# Supplementary material for: Untargeted Metabolomic Profiling and Antioxidant Capacities of Different Solvent Crude Extracts of Ephedra foeminea
Source: Metabolites. 2022 May 17;12(5):451. doi: 10.3390/metabo12050451 (PMC9146585; doi:10.3390/metabo12050451)
Supplement: Supplementary file 1 [file metabolites-12-00451-s001.zip]

Archive with 5 entries (5 files):
- Raw_data_GCMS.xlsx
- Raw_data_NEG_LCMS.xlsx
- Raw_data_POS_LCMS.xlsx
- Supplementary Figures.pdf
- Supplementary Tables.pdf
