# Supplementary material for: Untargeted Metabolomic Profiling and Antioxidant Capacities of Different Solvent Crude Extracts of Ephedra foeminea
Source: Metabolites. 2022 May 17;12(5):451. doi: 10.3390/metabo12050451 (PMC9146585; doi:10.3390/metabo12050451)
Supplement: Supplementary file 1 [file metabolites-12-00451-s001.zip › Raw_data_GCMS.xlsx]

## Sheet: Ace extract
Table S9: Raw spectral data of E. foeminea acetone crude extract analyzed using GC–MS
Name	Scan	RT(min)	Retention index	Model Masses	Model ion mz	Model ion height	Model ion area	Integrated height	Integrated area	SMILES	InChIKey	Dot product	Reverse dot product	Fragment presence %	Total score	Spectrum
Unknown	14	8.03105	961.037	[170.3]	170.6	18472.9	3450.27	929477	173603			-1	-1	-1	-1	50.3:0 51.3:1 52.3:1 55.2:4332 56.2:3570 58.3:12737 60.2:6668 61.3:1861 62.1:11 62.1:648 63.2:0 67.1:8201 69.2:0 71.2:7772 75.1:0 76.2:86958 77.1:1 79.2:0 81.1:11448 82.1:7928 83.3:11729 87.2:31294 88.1:5517 90.1:1226 92:9205 93.1:0 95:0 96.1:1481 105.1:6991 106.2:1 107:0 108.1:3880 110.1:273482 112.2:3934 120:12226 122.1:1360 124.7:190 128.10001:2993 134:73808 135.3:3972 136:3827 138.10001:10484…
Unknown	15	8.03327	961.165	[69.2]	69.2	292114	305657	2284649	2.39058e+06			-1	-1	-1	-1	52.2:0 53.3:96347 54.2:6045 55.1:14767 56.3:8069 58.3:77848 60.2:1293 61.1:4710 62.2:24050 65.4:13848 66:29422 67.1:17541 69.2:292114 76.1:137458 77.1:0 81.2:35194 82.1:36872 83.3:16079 87.1:39956 90:9718 91:19683 92.1:17405 94.3:14163 94.9:1 96:21353 96.7:6560 96.7:4979 101.1:28418 104.9:46011 108.2:2386 108.2:1235 110.1:140898 112.1:1655 114.9:46750 117.1:3501 118:19591 120.1:36079 123.1:9223 1…
Methoxyamine, 2TMS derivative	16	8.03547	961.293	[75.1]	76.2	118277	290476	6.46811e+06	15885030			-1	-1	-1	-1	50.3:0 51.3:1 52.2:834147 53.2:96494 54.2:10821 56.3:15218 57.2:68410 60.3:46937 61.2:48348 62.1:29547 63.3:1 64.2:23025 65.2:1251 68:10400 69.2:280659 73.1:778450 76.2:118277 79.1:1581111 81:29070 82.1:40350 84:59789 89:78568 90.1:4813 91:22743 95.1:2380 96:31806 96:31958 97.7:12801 99.1:62652 102:91353 102.9:53668 105:69126 107.2:36740 108.2:1892 110.1:200092 111.4:5646 114:15116 116.1:50617 11…
Gentamicin a	17	8.03768	961.422	[77.1]	79.1	1.71394e+06	4644938	6734818	18252022			-1	-1	-1	-1	53.3:93565 54.2:33805 55.1:67017 56.1:10916 58.1:62472 59.2:307851 63.1:60814 65.3:20656 66.1:39815 67.2:39472 79.1:1713937 80.3:71016 86.1:407273 91.1:34774 94.1:18595 95:2028 95.7:19681 96.4:18698 97.2:21218 100.1:560159 102.1:109010 103.9:1 105:20513 106.6:48286 108.7:7680 113:22277 113.9:46345 115.1:10330 117:131736 118.1:32984 119:82654 121.2:10858 122:31480 122.9:19758 123.7:6221 124.8:9576…
Trifluoromethyl-bis-(trimethylsilyl)methyl ketone	21	8.04653	961.936	[146]	146	708386	2.03399e+06	4.09014e+06	11744019			-1	-1	-1	-1	53.2:77715 54.4:31310 55.2:18353 56.2:2416 59.1:254396 62:12006 63.2:2195 64:36547 65.4:36385 66.1:32482 69.2:102806 73.1:1626 74.3:223063 75.1:1 86.1:398924 89.1:31417 90.2:9616 91.1:53242 93.1:14705 95.1:16072 96.3:1764 97:5044 102.1:63462 104:47138 104:46931 105.1:14335 107:24764 108.2:8217 110.1:175363 113.1:6004 114:12370 115:26135 116:51774 116.9:2370 118.9:44617 121.8:11081 123.1:14752 124…
Trifluoromethyl-bis-(trimethylsilyl)methyl ketone	24	8.05318	962.322	[73.1]	73.1	2.27764e+06	6857546	7284438	21932118			-1	-1	-1	-1	50.3:12486 53.2:125658 56.2:102236 57.2:120696 59.2:374010 60.2:9056 70.2:149000 71.2:82273 73.1:2277636 84:74525 86.2:144984 87.2:24773 89.1:68788 90.1:11331 99:73929 100.1:960431 102:152386 103:60961 105.9:36999 106.5:55916 107.2:15653 113:51267 113.6:4045 114.1:58418 115.1:2790 116:6422 116.9:50324 119.1:33486 122.1:13109 128.39999:20415 129.89999:57290 133:51184 135.5:10105 140.5:11880 142:35…
Unknown	26	8.0576	962.578	[121.8]	121.5	9805.17	18778.1	4.07396e+06	7802134			-1	-1	-1	-1	50.3:38518 51.2:141844 52.2:94382 54.2:39891 55.2:83826 56.2:60579 58.2:97643 60.3:37647 63.2:38202 65.2:38510 66.1:1285 67.1:41824 67.1:41867 69.2:275727 77.1:198560 79.2:8062 86.1:173261 88.1:34041 89.1:16309 91.1:39209 91.8:37514 93.1:1 94:30772 94.9:1 96:28765 96.9:16811 97.4:21720 100.1:205772 103.9:39015 104.9:42687 106.1:31844 106.9:6981 107.9:1590 110.1:162107 111.2:12063 113:51349 114:19…
L-5-Hydroxylysine, 4TMS derivative	30	8.06647	963.093	[79.1]	79.1	1.94467e+06	11402595	8.25799e+06	48420908			-1	-1	-1	-1	50.3:480135 51.3:564758 52.2:1015895 53.3:90870 54.1:27978 55.2:78406 56.3:45591 57.3:10911 58.3:95844 60.3:18922 61.1:23622 62.1:17986 63.2:61422 64.1:14034 65.2:38809 66:11288 67.4:39712 67.4:45195 68.1:5803 69.2:394691 75.1:590193 77.1:746063 79.1:1944665 81:39893 83.3:37614 84.2:21648 89.1:53885 91.2:60303 94.3:11769 96.1:29186 96.8:17720 99.1:15961 100.1:4460 101.1:11201 104.1:60379 105:1231…
Unknown	41	8.09082	964.507	[50.3]	50.3	14521.3	21792.8	427979	642287			-1	-1	-1	-1	50.3:14521 51.3:9813 52.2:10416 53.3:73883 54.2:725 75.1:12419 84.1:1926 93.1:12056 94.2:16672 103.8:9997 104.3:33168 108.2:1 120.1:1329 121.4:1923 121.9:2992 124.2:79 127.1:9037 139.10001:1386 148.2:11649 153.39999:3221 155.2:13592 156.8:2041 170.10001:361 171.60001:2446 178:0 189.2:9213 192.2:34564 196.7:826 198.7:160 201:1216 202.10001:522 214.7:536 220.7:6904 222:10586 226.5:282 238:314 240.3…
Unknown	43	8.09525	964.765	[281.5]	281	26747.2	15931.5	451791	269101			-1	-1	-1	-1	53.3:37063 54.2:536 64.3:8441 75.1:5125 84.9:20149 87.1:12467 88:3094 91.3:5335 106.9:697 106.9:13264 113.8:373 118:0 120.2:257 124:170 126.7:3593 130.89999:1697 133.8:18838 140.5:2513 141.39999:4518 141.39999:5909 145.89999:12242 146.89999:28630 148.89999:3781 152.39999:222 152.39999:1116 153.7:87 156:2904 157.39999:1319 159.5:6784 161:2570 165.39999:3125 165.89999:3535 169.89999:12510 172.7:344…
Unknown	52	8.11518	965.922	[75.1]	75.1	99950.1	198216	808735	1.60384e+06			-1	-1	-1	-1	50.3:0 52.2:1 53.2:55989 59.3:0 63.1:3512 64.4:2581 65:784 66.3:25154 67.1:2225 73.1:0 75.1:99950 76.2:68767 79.1:0 87.1:10646 90.2:2508 93:51107 94.9:1580 97:3475 100.9:22477 100.9:43532 102:1 103.1:10728 104:2722 105.8:5561 106.3:9311 107:1226 108.1:11914 109.1:5171 113.2:0 115.1:11895 116.1:0 116.9:1 118.1:38342 120.1:0 121.4:14113 127:3279 128:3394 130.89999:0 131.8:7890 134.2:11488 138.8:1 1…
Unknown	54	8.11962	966.18	[249.6]	249.7	31208.9	32390.3	1.2896e+06	1.33841e+06			-1	-1	-1	-1	50.3:1 51.2:0 53.2:49270 55.1:3870 57.4:11730 58.3:7251 60.4:7084 61.2:6202 62.2:10540 63.1:1204 65.2:1205 66.3:15659 67.1:7348 69.2:17839 76.2:3934 81:5316 84.1:0 85.2:17150 87.1:12493 89.1:2836 91.4:16278 91.4:8800 93:21701 94.1:10464 97.1:6204 101:3076 103.3:14720 104:1229 107.7:5858 110.1:1 113.2:2928 118.1:22826 121.8:4684 125:6811 127.7:2399 137.10001:3633 141.8:1411 144.7:7086 150.8:2040 1…
Unknown	57	8.12625	966.565	[83.2]	83.2	130400	313557	1.87523e+06	4.50914e+06			-1	-1	-1	-1	51.2:0 54.1:3814 55.2:39651 56.2:1807 57.2:5972 59.1:4461 61.1:7265 63.1:1423 66.1:13316 67.1:14881 69.2:19017 70.2:35231 71.1:24827 73.1:1 75.1:0 76.3:57286 77.1:0 80.3:68782 81.1:24965 82.1:12072 83.2:130400 85.1:13176 87.3:11365 88.1:8235 89.1:1 90.2:17539 91.2:9995 92.1:695 93.1:17803 95:7256 96.3:196 98.1:16960 99.1:14963 100:0 101.3:11409 103.1:0 104.1:6497 104.7:1 104.7:26095 106.3:262 107…
Unknown	58	8.12847	966.694	[266.9]	267	32830.5	77528	1.72404e+06	4.07125e+06			-1	-1	-1	-1	50.3:1 51.3:1 55.1:33067 58.5:22038 60.3:517 65.1:8089 66.9:2182 69.2:18044 70.2:36110 70.9:16209 76.3:123914 77.1:0 81.2:23758 82.1:11841 83.1:48785 86:1 90.1:32727 93.1:5518 95.1:7269 95.8:2755 96.9:824 97.9:11393 98.9:17700 100.1:0 101.3:16642 102:1567 107.2:0 108:15240 110.2:1 116.1:10712 119:3645 122.1:1656 126:314 126.8:5780 128.5:1799 129.89999:1 131.8:8467 134.8:17587 135.7:2477 136.5:422…
Unknown	61	8.13512	967.08	[125.4]	125.4	72041.2	159294	1.48541e+06	3284478			-1	-1	-1	-1	53.2:62955 55.2:21339 58.2:17325 65.2:1 67.1:4329 76.2:166589 77.2:0 81.1:4203 84.1:17221 89.1:7696 90:34759 91.6:14056 93:9083 94.3:12702 96.1:26018 97.8:6843 99:9704 101.2:14096 103.9:25875 106.1:7473 108.2:1236 111:19743 117.4:15853 121:18723 122.9:4481 123.5:4702 124.9:7373 125.4:72041 130.10001:0 133:71074 135.7:1567 139.10001:1170 139.8:4967 140.39999:4511 141.3:2816 151.8:2201 160.89999:42…
Cyclotetrasiloxane, octamethyl-	62	8.13733	967.209	[96.2]	97.4	9654.37	21594	4.16269e+06	9310707			-1	-1	-1	-1	51.3:0 53.3:9843 54.2:10930 57.2:1 58:26058 59.2:1 60.2:1917 65.2:0 69.3:1 70.3:18800 73.1:0 79.1:0 83.9:22887 86.3:0 87:5145 91.4:12197 97.4:9654 98.4:10777 100:0 103.2:1 105.9:1248 107:0 110.1:1 111:13468 112.1:2655 112.9:0 114:4372 117:13015 117:13994 121:18196 123.8:1575 125.2:71889 127.4:1011 129.89999:0 130.89999:0 133:66568 136.10001:3277 138:1188 139.89999:4259 140.8:826 141.8:3546 142.8:…
Cyclotetrasiloxane, octamethyl-	63	8.13953	967.337	[280.8]	280.8	2.26287e+06	5240875	4.96551e+06	11500289			-1	-1	-1	-1	51.3:0 53.3:47973 55.1:28205 57:8292 57.5:12037 61.1:3853 62.1:10100 63.2:1 65.1:22072 66.1:9345 69.2:58724 75.1:1 76.2:203098 77.1:1 83.2:82300 85:19892 89.1:1 90.2:30208 91.1:24310 93:45382 94.1:15613 96.1:12094 97.1:6667 101.2:11455 103.1:6182 105.1:10373 106.1:5486 107.1:686 108.2:10783 110.1:1 112.1:15405 114.3:5748 114.9:2948 117.6:32839 118.4:62271 118.4:54801 120:0 122.1:3403 125.2:13956 …
Unknown	70	8.15503	968.237	[282.7]	282.7	79934.5	44431.7	569499	316557			-1	-1	-1	-1	58.2:1807 60.2:641 67.1:3566 69.2:0 70.3:2161 76.1:25057 81:1999 82.2:1749 84.1:1934 87.9:8054 90.2:4605 92:117 93:9025 101.1:10099 107.9:4568 109.1:1489 111.4:15893 111.4:1317 121.1:1645 122.2:998 126.1:2847 130.89999:13981 135.60001:53 140:699 148.3:12556 148.3:17529 151.89999:444 152.60001:259 154:950 160.7:7513 163.8:437 165.60001:1405 170.8:8142 174.8:18141 177:27945 177:29947 178.8:316 182.…
Unknown	84	8.18603	970.037	[95]	95	69791.1	139690	3083454	6171671			-1	-1	-1	-1	60.3:4649 63.8:11042 69.3:1 71.1:38417 80.1:70395 84.2:13745 91:7347 91.7:20644 92.9:20520 95:69791 113.1:5075 117:18989 118.9:4206 122:2203 124:2315 126.4:3950 130.89999:25360 133:243676 134.89999:73779 135.89999:833 148.8:61713 151:10930 152.2:5087 155.8:8936 159:44447 159.89999:1 160.89999:44265 161.89999:7906 164.60001:6267 167.5:2393 174.89999:193727 178.7:8159 188.89999:150206 192.60001:238…
Boric acid, 3TMS derivative	86	8.19047	970.294	[73.1]	73.1	5040153	10110532	13405678	26891750			-1	-1	-1	-1	51.3:9591 52.2:0 53.2:41994 54.2:10134 55.1:4845 56.3:2069 57.2:1496 59.2:185390 61.2:27105 62.3:11130 63.2:2702 65.1:0 66.2:69813 67.1:1 69.2:3299 70.2:13292 73.1:5040153 74.2:353936 75.1:364706 76.1:29659 77.1:0 79.1:0 81.2:23273 82.1:18056 83.2:3199 85.1:35259 87.1:85890 88.2:41959 89.2:10942 90.3:8660 91.2:1075 93:1 95.1:6218 96.2:3642 96.9:0 97.6:1 99:0 100.1:1 101.1:49094 103:219630 105.1:5…
Unknown	88	8.19488	970.551	[146.8]	146.8	1.05914e+06	2.23089e+06	3.08563e+06	6499320			-1	-1	-1	-1	50.3:8429 51.2:10758 54.3:8068 55.2:5458 57.5:6601 58.2:13148 59.2:4848 60.2:14525 63.2:7752 64:1866 66.2:11575 68.1:8906 76.2:31930 81.1:24914 81.9:27915 81.9:16279 83:8313 83:18094 84.1:5544 85.1:33432 88:34733 101:32909 103.1:91096 104.1:12063 106.9:7892 108:6369 109.1:4596 111.5:1 115:50712 115.9:855 117:15867 119:10943 122:1978 124.2:1446 128.2:1549 129.7:11237 131:54183 135.89999:2315 140.3…
Unknown	91	8.20155	970.938	[151]	151	6676.02	11218.7	646770	1.08686e+06			-1	-1	-1	-1	50.3:5450 52.2:4678 56.4:1 59.2:7701 65:13145 66.1:9151 67.1:0 70.2:12002 82.9:1221 87.9:19356 90:1729 91:0 93:4623 95.1:9628 102.1:15073 103:5884 104:37017 104.9:1809 115.9:23958 117.9:590 120.1:1287 122.1:5196 123.1:5067 124.1:228 125.8:1114 129.10001:12462 132.89999:19198 134.89999:42026 138.2:1405 140.89999:3940 141.89999:416 143.3:3711 143.3:6245 148.89999:2751 151:6676 152.39999:1151 155.89…
Unknown	96	8.21262	971.581	[159.9]	159.9	23837.6	50009.1	308950	648149			-1	-1	-1	-1	51.2:5798 56.3:1 57.2:1 58.1:10823 60.1:672 63.1:1 64.3:7190 69.2:765 71.2:523 86:5622 86:12041 89.1:20071 92:7609 94.4:893 95.9:10969 95.9:5880 98:7690 99.3:3506 99.3:3506 100.9:498 101.6:2513 104:6198 104.8:3600 105.9:4904 106.4:659 108.1:0 110.1:1 112:5798 123.6:905 125.3:1 126.4:3663 127.8:1255 137.2:1 138:1008 140:2457 141.8:1025 144:340 147.89999:6359 149.89999:637 150.7:1074 152.60001:1172…
Unknown	97	8.21482	971.708	[224]	223.6	12570.5	9325.48	336529	249654			-1	-1	-1	-1	51.3:8236 57.3:3087 58.2:271 60.2:141 61.2:3580 62.1:14564 63.2:0 75.1:1 77.1:0 80.3:30494 86.2:3514 89:10286 91.1:9094 91.9:247 93:0 96.1:2039 105:11491 106.9:1143 109:5297 111:7738 113:5214 118.1:715 121.2:5959 124.4:4186 125.8:4841 126.9:1 127.9:375 129.89999:6102 133.7:1418 135.7:1043 138.10001:3339 144.10001:46 150:7477 151.8:469 154.8:1 156.3:7885 156.89999:7643 156.89999:13016 158.3:11788 …
Unknown	99	8.21925	971.966	[264.2]	264.6	9405.1	12092	596654	767112			-1	-1	-1	-1	50.3:0 51.2:15370 52.2:1 53.3:4663 55.1:622 57:7389 59.1:0 60.2:7822 61.1:7967 62.3:4461 63.1:7239 64.4:414 65.2:12701 66.1:0 73.1:1 75.1:33676 76.3:4494 77.2:7379 79.1:48120 81.1:8311 83.1:8238 84:0 85:3294 85.9:3887 87.9:9591 89.2:12169 94:2094 96.6:2720 96.6:7943 99.1:1111 100:0 101.2:1 101.9:5578 103.2:0 104.1:18201 105:2833 106.2:6667 107:5808 109.1:3081 110.1:3063 111.1:9368 113.1:2017 115:…
Unknown	103	8.2281	972.48	[132.1]	132.1	23837.7	31826.4	450947	602072			-1	-1	-1	-1	51.2:4618 53.3:14125 56.1:7038 57.2:5230 60.1:2765 61.2:3078 63.1:13985 69.2:0 81.1:776 84.2:11389 84.2:9601 89.1:17295 91:5279 91.8:3725 96.2:216 98:676 99.1:13361 99.1:25379 103.9:1 106.3:4932 108.9:4504 110:6960 111.2:20819 113.1:352 123.2:2338 125.7:0 128.39999:4635 129.8:9251 132.10001:23838 133.8:744 134.5:4564 137.8:7370 137.8:3396 140.10001:2265 141.8:3139 143.2:1392 151.7:1179 158:5951 1…
Unknown	107	8.23697	972.995	[137]	137.3	23005.8	55775.4	535832	1.29907e+06			-1	-1	-1	-1	50.3:1 52.3:3602 56.1:438 58.2:25422 64:6435 65.1:1676 69.3:0 70.9:14213 76.2:44597 82:12279 83:2830 84.1:1 86.2:1 89.1:1 89.9:12213 95.9:22780 98:14785 99:4210 101.9:237 103.3:12882 106.9:3791 107.6:4393 110.3:16356 122.1:772 125:21633 125:14615 127.9:10162 137.3:23006 137.3:19491 138.7:8128 140.60001:888 145.8:32925 154.89999:122 159.89999:6879 161.7:4354 161.7:1274 164.2:1 165.89999:0 166.5:25…
Unknown	110	8.24362	973.381	[154.9]	154.9	1.06896e+06	2.74218e+06	3.72164e+06	9547058			-1	-1	-1	-1	51.2:23039 54.2:13314 55.3:16533 56.1:9643 57.4:20139 59.3:1 60.1:1 61.2:51930 62.1:19903 63.2:11743 65.2:31979 66.4:7486 73.1:145751 75.1:803851 79.2:247617 80.2:72615 81.1:35070 83:7573 85:49042 85.9:0 87:494 87.8:0 88.4:905 89.1:26818 91:15248 91.9:17667 93.1:1152 94:3065 94.9:1084 97:65928 99:38193 101:1137 103:1 104.9:14095 106.3:12206 108.8:11423 110.9:32861 113:49224 115.1:50453 116.6:1761…
Unknown	113	8.25025	973.766	[70.1]	70.1	77707	107849	489855	679866			-1	-1	-1	-1	50.3:12017 52.2:16476 53.2:23164 54.1:10698 55.1:14022 62.1:19078 67.2:24056 69.2:0 70.1:77707 71.1:14871 77.1:0 83.1:14121 83.9:13804 93:6226 94.1:12543 95:1 100.1:12676 100.9:1 102.2:247 102.2:1585 107:2670 109.1:12954 111:4782 114:5926 122:3258 122:7533 123.9:611 124.9:864 132.89999:1 134.89999:390 137.8:1899 141.3:1272 150.60001:0 153.10001:2039 154.89999:2547 162.89999:1 163.89999:1072 165.8…
Unknown	155	8.34325	979.167	[239.6]	239.5	6457.1	11754.1	460269	837846			-1	-1	-1	-1	55.2:3992 56.4:54 73.1:40225 76.3:27611 81.7:1062 83.1:7863 86.1:588 87.5:2174 88.9:5912 89.5:6004 90.1:6249 93.1:20248 95:12850 99.1:8743 100.8:2181 103:0 104.7:11508 105.3:5556 105.8:5823 106.8:3273 108.1:2389 114:1592 122.8:0 123.9:1417 124.8:1065 125.8:7140 126.4:69 130.89999:5132 132.60001:3740 133.10001:6718 134:1770 134:814 135.8:665 143.3:1905 143.3:1522 144.10001:1466 146.7:1 148.5:8795 …
Unknown	162	8.35875	980.067	[159]	159	43322.7	129926	573172	1.71897e+06			-1	-1	-1	-1	56:2845 58.1:3524 68:11810 71.5:1432 73.1:25939 75.1:23378 76.3:145731 86:7701 87.2:3165 89:1333 95:1986 96.5:3136 103.1:15938 107.8:2492 112.1:801 112.6:3309 117:7641 119.1:7894 120.2:17125 121.1:3829 121.9:5499 121.9:4796 123:4139 127.5:2510 130:7176 130:7341 130.89999:9140 131.7:10916 132.39999:11805 133:1143 133:127 134.39999:3465 139.89999:2593 142.89999:3224 150.10001:1762 152.60001:600 154…
ORTHO XYLENE; EI-B; MS	169	8.37423	980.966	[107.2]	107	24619.9	26348.8	704726	754216	Cc(c1)c(C)ccc1	CTQNGGLPUBDAKN-UHFFFAOYSA-N	696.113	566.765	809.524	753.954	50.3:8400 51.3:1 52.2:6835 53.3:1 54.2:1285 55.2:0 57.3:3642 59.1:1793 60.1:1168 61.1:5680 62.2:924 63.1:1 65.1:0 66:1714 67.1:1826 73.1:1 75.1:1 77.1:1 79.1:0 81.2:1858 82.1:408 84.1:8553 85.1:3041 86:0 87:4334 87.8:1499 88.4:7319 89.1:3453 90.9:335380 90.9:1286 92.1:1846 93:1 96:0 99.2:3071 100.1:6529 101:1989 103.2:2606 103.9:541 104.9:12126 106.1:1 107:24620 108:679 110:1 111.3:30 112.9:0 116…
Unknown	171	8.37867	981.223	[120.1]	120.1	7169.89	7219.45	264115	265940			-1	-1	-1	-1	56.1:281 71.1:7731 72:13457 83.9:5237 90.1:12867 95.1:0 101.1:0 105.1:13388 108.9:2213 110.8:3459 113.6:2603 114.8:2347 116.9:8635 117.5:2555 120.1:7170 122:4877 123.6:1984 127.7:974 128.60001:1826 129.89999:3087 136.10001:14 136.7:1774 143.10001:5195 144.2:2736 145.7:3516 147.60001:4073 148.10001:9837 148.60001:6770 149:2495 152.3:692 156.39999:15 158.5:1586 160.7:1130 161.89999:481 164.39999:11…
Unknown	182	8.40303	982.638	[101.8]	101.8	24939.5	20826.5	2.47838e+06	2.06965e+06			-1	-1	-1	-1	50.3:36307 51.2:119300 52.2:83081 53.2:68325 54.2:8727 58.7:18745 59.5:55788 61.2:659 62.3:25538 63.2:31696 64.1:21834 65.2:31209 66.2:10815 67.2:2155 71:3094 71.9:6991 77.1:203255 79.1:505103 81.1:20097 82:3261 83.2:2358 84.1:4358 85.3:808 87.5:786 91.1:14369 94.1:24317 97.1:2838 101.8:24940 103:4379 104.1:3225 106:156565 111.4:354 111.4:4229 112.9:2957 118:2533 121:831853 124.9:1993 127:157 127…
Unknown	185	8.40967	983.024	[81.1]	81.1	24415.4	17237.2	683900	482831			-1	-1	-1	-1	52.3:4322 56.5:3872 57.4:15564 58.8:7505 59.6:18602 61.1:28358 62.2:117947 63.1:5970 64.3:723 65.2:17517 66.2:3436 74.2:22804 77.2:22374 79.1:103868 81.1:24415 89.1:13891 93.1:13309 94:22368 97:215 103:6446 104:7157 109.9:1281 109.9:6250 111.8:2357 116:9634 118:9034 125.8:1471 127.1:786 127.8:148 129.8:7749 130.5:1575 130.5:691 132.8:4385 133.89999:1997 140.89999:209 142.7:5021 143.2:4658 144.5:2…
Pyridine, 2,4,6-trimethyl-	187	8.4141	983.281	[75.1]	75.1	51873.3	150556	4.893e+06	14201361			-1	-1	-1	-1	50.3:41556 53.2:142597 54.2:48330 55.2:35011 56.1:7495 58.8:221509 59.5:51533 61.2:26569 62.1:345299 64.2:32749 65.2:775884 67.2:40470 68.2:88565 75.1:51873 81.2:128844 82.1:12066 83.2:4429 84.1:1800 84.9:10336 86:30641 88.3:39894 89:94469 91.1:23665 92.1:107489 93.1:1128245 94.1:879400 96.2:6550 99.3:1473 99.9:18902 101.1:775 103.2:148978 108.2:14439 110.2:11623 113.2:3558 115:5183 121:2013 128.…
Pyridine, 2,4,6-trimethyl-	189	8.41853	983.538	[121]	121	31856068	96067456	69724400	210265920			-1	-1	-1	-1	50.3:733928 51.2:1826563 52.3:1175130 53.2:1039864 54.3:170275 56.3:34202 57.1:42005 58.7:240414 59.7:251835 61.2:6221 62.2:317312 63.2:1058011 64.2:408705 65.2:795963 66.2:410509 67.3:181480 68.1:98645 69.2:36720 70.2:15041 74.3:150355 77.1:5730344 79.1:12249085 82.2:196497 83.6:10754 84.9:15006 86.2:31297 87:5420 87.9:43040 89.1:94028 91.1:952641 93.1:887366 94.1:907655 96:11291 96.7:10152 98:6…
Unknown	194	8.4296	984.181	[81.1]	81.2	61108.2	90686.2	1203743	1.78639e+06			-1	-1	-1	-1	52.2:9742 53.2:6234 55.2:87690 56.2:5534 59.7:12784 61.1:104430 66.2:1306 68.2:16855 71:5523 72:9829 73.1:19281 80.1:298598 81.2:61108 87.1:8559 89.1:1478 92.1:169156 95:57481 96.1:3395 98:12819 98.9:13783 100.1:370 103.1:1077 106.1:18220 113.3:251 115.8:21739 121:727 123.8:1943 124.9:568 125.7:654 125.7:1930 127.6:265 129.3:2412 130:4799 130.89999:2785 131.60001:3353 132.39999:4593 133:594 133.6…
Unknown	195	8.43182	984.31	[55.2]	55.2	76898.6	223669	1.31197e+06	3.81601e+06			-1	-1	-1	-1	54.3:9761 55.2:76899 61.2:102631 67.2:44849 68.2:80538 69.2:35433 70.1:21143 71:7291 73.2:112855 82.1:38142 84.2:8545 86.4:26027 88.1:29027 91.1:49570 93.1:42258 94.1:19731 96:2883 96.6:11543 98.2:10800 101.2:11496 103.2:8168 104.1:55369 106.1:45548 110.2:0 112.9:244 113.9:1879 115.9:31209 121:2741 124.1:2892 125.2:1335 126.1:5346 131.89999:6038 135:1519 135.89999:2843 136.8:4076 137.89999:4708 1…
Unknown	199	8.44067	984.824	[62.1]	62.1	111163	112929	374089	380034			-1	-1	-1	-1	55.1:489 56.3:571 62.1:111163 71.2:2133 83.2:1 85:13102 87.2:8020 87.2:6454 98.3:3401 99:8076 101.6:40757 109.1:299 111:3328 112.1:566 112.8:593 125.5:695 126.2:561 126.9:158 126.9:2178 128.8:118 130:2435 130.89999:1362 134.10001:224 134.89999:1457 138:690 138.8:1700 142:865 143.7:3589 148.8:3764 150.60001:770 151.60001:1573 157.3:3408 158.10001:1417 158.89999:2495 159.89999:533 162.10001:98 168:…
Unknown	208	8.46058	985.981	[86]	86	34629.9	58306.8	546727	920531			-1	-1	-1	-1	54.2:12 55.1:13137 57.2:17931 59:44502 67.3:964 68.3:24959 71.8:10191 83:2762 86:34630 86:18820 88:4296 90:7817 97.7:3725 100.1:4236 101:30642 108.2:5769 114.1:5886 114.8:4683 115.9:8901 123.1:3992 127.8:2171 128.7:3197 132.89999:3193 135:1630 136.3:693 142.10001:3731 143.60001:23965 143.60001:27596 146:9861 149.5:1968 150.3:290 152.39999:1505 152.89999:2303 156.2:1726 157.89999:1176 159:18099 16…
Unknown	210	8.46502	986.238	[267.6]	267.6	1551.77	2133.62	216394	297532			-1	-1	-1	-1	50.3:1 51.2:1 52.2:1 53.2:0 54.2:1 55.1:0 56.3:1966 58.3:5710 61.3:1 63.2:1 64.1:0 65.1:1 66.2:0 67.2:0 68:13578 69.2:0 71:4733 73.1:1 75.1:0 77.1:0 79.1:1 81.1:1 82.1:0 84.1:365 85.3:7268 86.1:1484 87.3:934 88.1:0 89.1:1 89.7:6280 91.1:0 93.1:0 94:1 96.1:6795 99.2:10853 100:1 102.9:1 104.1:0 106:0 108:429 111.4:2815 112.1:2184 112.8:3362 112.8:2933 116.9:1996 117.9:1 121:0 124.9:484 126.8:1016 1…
Unknown	231	8.5115	988.937	[89.2]	89.2	26883.2	64839.9	483428	1.16598e+06			-1	-1	-1	-1	53.2:56223 56.2:1575 57.3:19387 58.2:5776 63.1:4736 67.1:7121 71.4:1376 73.1:40008 75.1:15426 83.2:993 85.2:3392 89.2:26883 92:15417 96.9:3592 101.1:4282 108.9:1688 110:1816 111.3:336 113.8:2655 116.1:31105 117:19599 118.7:2104 126.8:2985 129.2:1554 129.89999:5462 133.39999:5389 139.7:3678 142.8:1143 142.8:10920 144.8:5708 147.89999:8643 149.5:2393 153:814 153.60001:285 154.7:3163 155.60001:4802 …
Unknown	235	8.52035	989.451	[56]	56	30162.5	44432.5	729189	1.07417e+06			-1	-1	-1	-1	50.3:6456 51.3:1128 52.3:19019 53.3:46802 54.9:11816 55.5:1 56:30163 56:7760 57.2:19698 59.1:1753 62.2:1111 63.1:1 64.2:3060 65.3:1 66.2:2097 66.2:4420 67.3:1 69.2:12375 70.2:7077 71.7:21816 75.1:0 77.1:13687 79.1:1 83.1:8664 83.1:11312 84:3919 84.9:4239 86.4:511 88.1:3672 91.2:3712 93.1:4155 94.3:7978 95.1:482 96.3:2817 96.3:8366 97.2:4740 97.8:7094 98.7:4388 99.3:11060 99.9:4988 100.8:3372 104:…
Unknown	238	8.527	989.837	[235.6]	235.6	5468.25	9303.97	440161	748913			-1	-1	-1	-1	56.3:13824 57.1:8720 68.1:11048 70.6:4027 82.2:2623 83:3650 83.6:5660 84.1:4418 86.9:9158 90.4:12744 91.1:7472 95.2:8422 101.8:3471 103.2:15779 103.2:1273 106.8:8492 107.8:6207 107.8:4953 117.1:6599 117.8:318 122.4:10956 123.8:3043 126.3:3544 127.7:1907 129.89999:1547 131.10001:8417 132.5:7137 135.89999:893 140.39999:565 143:6076 146.8:43327 148.89999:11108 151.5:430 154:4141 156:3904 159.8:1336 …
Unknown	239	8.52922	989.966	[235]	235	13310.7	27284.8	439176	900239			-1	-1	-1	-1	57.3:1 58.2:223 60.2:199 66:1274 67:0 68:8993 70.4:3088 82:2974 84.1:1426 85.5:2347 87.1:5602 88.8:20676 91.2:8479 91.2:16723 92:7884 95.2:5958 96.3:5896 98.5:2198 101.6:971 102.8:8723 102.8:17924 108.1:7459 108.8:2836 110.2:3981 113:111 113.9:1893 116.2:40437 123.6:1768 127.5:2836 128.3:3471 129.10001:2780 130:424 131.5:6624 134:3259 135.3:1 136.7:984 138.2:102 138.8:1253 139.60001:2206 140.3999…
Unknown	250	8.55357	991.38	[210.7]	210.7	7429.38	11826.9	348297	554456			-1	-1	-1	-1	50.3:7108 52.2:7773 53.2:5741 56:1934 56:727 60:1252 61:0 64.2:7008 68.2:3063 80.2:17877 82.6:599 84:231 85.9:1463 88.1:4816 90:458 91.3:296 91.9:6160 94.2:1 96.1:3031 97.9:1344 99.9:5122 100.5:8041 101.1:2719 104.8:2800 107:7126 110.2:5157 110.2:12605 111.8:171 112.7:2818 113.9:1330 118.1:5674 122.6:748 128.5:121 136.8:2833 141.7:1102 144.3:3412 148.7:0 150.2:1491 150.8:190 152.10001:1173 156.2:…
Unknown	251	8.55578	991.509	[174.6]	174.8	7689	9071.2	384082	453126			-1	-1	-1	-1	50.3:1538 53.2:25290 55.2:6336 57.1:3974 57.9:10919 59.2:1 60:498 62.2:2036 63.1:925 64:2833 65.3:392 66.2:3813 66.8:4942 67.3:3215 70.2:9552 71.1:30 73.1:1 75.1:1 85.2:0 86.8:3457 88.1:5331 89.1:0 92:11001 93:19317 95:0 96.5:3330 97.1:0 102.2:3739 103.6:0 103.6:1429 106:1 110:4185 111.2:6883 113.1:4896 114.9:1 123:4054 124.2:1031 125.1:2688 127.2:1 128.7:969 132.2:6717 132.8:5261 133.7:2771 134.…
Unknown	258	8.5713	992.41	[332.2]	332.2	3340.9	5831.81	314489	548966			-1	-1	-1	-1	51.2:14720 58.2:903 60.1:1166 60.6:4488 61.1:1002 61.8:4446 63.1:3163 67.1:5863 71.1:1300 77.1:1 84.3:9311 86.7:8541 86.7:5071 89.3:2516 94.2:3563 96.2:4095 97.3:2708 98.7:2150 100.9:3697 101.7:4782 102.3:5920 102.9:848 106:1 107.1:12025 108:2286 109.5:7497 114.2:946 115.8:11170 124.7:181 125.4:372 130:3196 131.5:1816 132:7789 134.2:2159 135.39999:839 137.60001:1923 141.3:3086 147.89999:12498 153…
Unknown	262	8.58015	992.924	[117]	117	94133.5	191105	591779	1.2014e+06			-1	-1	-1	-1	61.2:99 64:5676 65.1:4118 66.3:1122 68.1:7453 73.1:4923 75.1:15509 79.2:57462 81.2:29753 89.9:3833 91.1:0 93:9796 94:0 96.6:3303 103.1:165 104:4022 112.2:5924 113:7206 117:94134 118.8:16804 120.1:5081 122.1:4532 124.3:1117 124.9:39 126.5:11565 127.4:5106 130.60001:10043 132.89999:8143 138.7:7983 146.89999:25669 148.5:10721 149.10001:13244 150.89999:2080 152.60001:25 155:1188 156.8:9177 157.8:1617…
Unknown	265	8.58678	993.309	[73.1]	73.1	127761	260099	916080	1.86498e+06			-1	-1	-1	-1	50.3:4600 51.2:11730 52.3:4181 53.3:22486 54.2:15260 55.2:984 56:0 58.2:3631 59.2:9163 61.2:2169 63.2:2587 64.2:5144 66.1:21431 67.1:1782 68.2:12714 69.2:6236 73.1:127761 75.1:27034 76.1:28422 77.1:6733 79.1:43952 80.2:59087 82.2:6352 83.2:6749 84.1:4494 84.9:2980 85.5:7287 86:18885 87.7:5791 89.2:1104 95:10709 97:10885 98.9:18567 98.9:17135 101.1:5895 104.3:7240 108.9:2516 110.1:4130 110.9:16170…
Unknown	270	8.59785	993.952	[154.9]	154.9	223861	547990	1.07457e+06	2.63045e+06			-1	-1	-1	-1	59.1:956 60:5424 61.1:10298 62.5:6426 64.2:2195 73.2:179392 75.1:116103 76.2:21099 81:36974 83.8:11677 85.9:5567 87.2:5995 93:62743 95.2:7104 95.8:9409 100.1:17141 100.7:12311 103.1:1677 103.9:1920 105:1 106.1:22264 108:6935 118.6:1350 120.1:42898 123:2182 124.9:5755 127:21944 131.2:3934 131.2:4416 134.7:1591 137.3:5084 138.8:3403 143.2:0 152.8:736 154.89999:223861 157:10520 158.2:0 160.7:1862 16…
Unknown	273	8.6045	994.338	[156.5]	156.1	13961.9	16355.7	467159	547256			-1	-1	-1	-1	50.3:1 53.2:26313 55.1:1469 56.2:1 57.1:1 59.2:5456 61.2:1599 63.2:1645 64.1:13242 66.1:6486 71.2:1 71.9:3356 73.1:20453 75.1:37747 76.2:48829 77.1:10604 79.1:3789 82.1:1 85:5942 86.1:5906 87.8:696 89.1:1135 92:8046 93:9115 94.2:2711 96.4:5238 97:7232 99.3:7534 102.1:4914 104.1:5076 105:0 109:1943 111:8627 112.9:5829 114.7:4626 115.2:11521 115.9:2642 117.9:9811 120.8:1 122.1:619 122.9:573 124.8:8…
Unknown	274	8.60672	994.467	[169.9]	170	5515.9	12596.3	676545	1.54498e+06			-1	-1	-1	-1	50.3:0 51.3:0 52.2:25910 53.2:16413 54.2:16782 55.2:813 56.4:8085 57.1:1 58.2:1663 59.4:1260 61.3:5410 62.1:1757 64.2:12799 65.1:6253 66:15726 67.1:2435 67.7:7695 69.2:1003 70.2:8438 71.2:309 73.1:59415 77.1:1 79.1:36202 82.1:0 82.1:6339 83.2:8052 84.6:1 85.2:4589 89.2:3852 89.8:3738 91:1414 94:8887 95:888 97:22639 97:17359 98.8:7769 98.8:14323 102.2:5365 104.1:7726 108.2:311 108.2:2041 110.1:540…
Unknown	277	8.61335	994.852	[127.2]	126.9	1210.47	2210.52	408332	745684			-1	-1	-1	-1	52.2:14841 54.2:9860 58.1:6537 60.1:2993 63.9:3944 65:3488 87.8:930 90:2524 91.2:4499 91.2:4499 92:1 94.1:4865 99.7:24894 101:1087 105.1:26754 120.2:7353 124.1:850 125:210 126.9:1210 126.9:28180 128:10844 131:13718 136.5:4065 141.60001:1 143.10001:9876 143.89999:4933 147.8:14967 149.7:1963 151:2596 152.3:1183 153.39999:385 157.2:1811 158.39999:9981 158.89999:9534 158.89999:10547 160.7:786 162.7:1…
Unknown	291	8.64435	996.652	[128.1]	128.1	24503.6	58208.8	1047660	2.48874e+06			-1	-1	-1	-1	50.3:1 51.2:14276 54.4:26940 56.3:111671 59.1:1985 60.2:9446 61.1:6453 62.1:6333 64:251 68:21624 73.1:211473 75.1:75063 76.1:44782 77.1:9655 81.2:0 86.4:12930 87.2:957 89:8055 93:8192 95:776 96.1:1 97.1:25998 99.8:6340 100.9:5037 104.9:18770 106.6:4457 110.1:2555 112:12119 114.2:10811 115:13803 116.1:1 122.2:6640 124.5:1959 125.7:4840 126.2:2816 127.3:369 128.10001:24504 129:12175 131:61644 133.1…
Unknown	292	8.64657	996.781	[73.1]	73.1	235310	518959	852976	1.88117e+06			-1	-1	-1	-1	50.3:0 51.3:14871 52.2:8817 53.3:0 54.1:1851 55.2:1 56.2:45829 57.2:1 58.2:1 59.1:24575 60.4:8752 61.1:3594 61.8:8213 63.1:1 65.9:1 67.1:0 69.2:1 70.2:1 71.2:0 73.1:235310 75.1:48478 77.2:9751 79.1:0 82.1:22940 84.1:0 85.2:0 86.4:9163 88:2729 89.3:317 91:0 91.6:13604 93.1:1 93.9:1970 97.1:16861 98.3:1 99.1:0 100:6772 103:5878 103.7:9477 106.9:5780 108:1 108.8:1 110:2186 112.1:1 113.2:1 114:19234 …
Unknown	293	8.64878	996.91	[105]	105	52528.6	125040	672655	1.6012e+06			-1	-1	-1	-1	51.2:12570 54.2:19075 59.2:14206 60:6805 63:0 63.9:1693 64.5:7203 66.4:13659 73.1:22931 77.1:10124 86.2:6288 88.5:5117 91.1:1 100.2:34034 101:12529 103:3756 104:7775 105:52529 111.7:8840 120:27271 123:817 123.9:1515 127:4709 128:31959 129:3358 129.89999:2034 131:58118 132.60001:1437 135.8:344 138.3:2369 139.8:1 143:38706 147.89999:10006 149.89999:214 150.89999:1788 150.89999:4151 152.39999:782 15…
Unknown	295	8.65322	997.167	[182.9]	182.9	8247.93	12436.6	443362	668524			-1	-1	-1	-1	50.2:9112 54.1:20729 59.1:6052 65.1:0 66.3:16437 73.1:22441 75.1:15762 77.1:6976 78.2:755 79.1:0 83.1:13674 89.4:0 93:1599 94.8:5349 95.8:2476 97:17633 102.3:4814 102.3:8275 103.7:660 105:119 108.7:0 110.7:9195 114.9:675 116:19398 116:18943 118:473 122:6182 126.2:4543 128.3:8913 129:2986 129.7:17440 134.10001:2759 134.60001:2199 135.7:342 136.5:1 137.3:1506 139:4169 145.89999:15739 147:0 149:2459…
Unknown	301	8.6665	997.938	[144]	143.5	19411.7	19001.3	417608	408779			-1	-1	-1	-1	62.9:10327 62.9:4606 65.2:1 66.2:16755 70.2:1 71.2:0 79.2:7261 80.2:16600 81:0 84.3:1 86.3:27388 89.2:7893 94.1:4587 95.9:1444 101.1:1234 102.1:3286 108.1:994 108.9:1370 110:7577 110:17730 113.3:0 115.2:2138 116.4:17888 116.4:19031 117.8:180 120.9:6248 125.7:2149 131:3514 135.89999:1284 138.2:760 140.7:6659 143.5:19412 145.7:4018 146.8:2420 149:374 151.10001:359 152.39999:1032 154.8:2208 155.7:39…
Unknown	302	8.66872	998.067	[110.7]	110.2	14439.7	15225.3	520843	549182			-1	-1	-1	-1	50.3:14351 52.2:15086 59.3:4441 60.3:1741 60.3:370 66.3:18847 73.1:0 75.1:0 76.2:42901 79.1:34596 82:18559 83.2:16975 87.1:259 87.9:2587 88.9:7291 88.9:8188 91:4333 91.8:7266 93:425 95:0 102.9:7647 104.3:1 104.9:0 106.1:9923 107.3:1 108.1:329 108.8:2776 110.2:14440 116.9:9842 118:4968 119.1:5984 123.6:2263 123.6:4665 126.9:3329 128.10001:1 129.3:1759 130.39999:13117 132.3:16865 132.89999:3943 135…
decane	312	8.69085	999.352	[161.8]	161.8	26008.7	56129.1	10954481	23640794	CCCCCCCCCC	DIOQZVSQGTUSAI-UHFFFAOYSA-N	942.396	494.298	555.556	767.676	50.3:3599 51.3:7324 53.2:100920 55.2:628213 57.2:3954143 58.2:170040 62.2:9033 64.2:6139 65.2:16330 67.2:65647 68.1:1855 69.1:319708 70.2:820388 71.2:1785966 81.1:23754 84.3:524209 85.2:1101006 94.3:8440 95.9:494 98.2:304194 99.2:297619 108.2:3229 108.7:5804 110:9407 110.8:16078 112.1:100817 113.2:176377 114.5:3851 118.3:7708 119.1:4359 121:9489 129.89999:3718 131.89999:24400 132.60001:2698 134.6…
Unknown	315	8.6975	999.739	[83.1]	83.1	185220	170974	843104	778259			-1	-1	-1	-1	51.2:4346 52.2:4055 53.3:9867 55.2:36833 58.3:5198 63.1:10196 65.1:7523 66.1:15036 67.2:1812 68.1:35948 69.2:20110 71.2:24338 73.2:0 77.1:14545 79.1:61703 82.3:54079 83.1:185220 84.2:6601 87.2:5037 87.8:287 89:1095 89.9:5408 91:11729 92:10558 95:3645 96.3:13021 100.3:18593 103:1 104.1:10688 105.1:1 106.1:527 106.7:4686 109.1:4638 110.2:3816 112.2:4848 114.7:2204 116.2:8466 118.8:8194 120.2:39 123…
Unknown	321	8.71078	1000.33	[72.4]	72.4	252614	534441	879040	1.85973e+06			-1	-1	-1	-1	57.2:70 66.2:34542 70.2:23363 71.2:59147 72.4:252614 75.1:14066 85.3:17237 88:143 93.1:8808 99.3:13547 100.3:24645 101.1:4290 104.1:12642 106:5624 112.2:8300 113.2:16935 114.3:33238 117:0 118.1:1 120.1:7804 125:1246 125.7:2261 127:368 128.2:3477 128.7:8625 129.89999:3138 130.89999:0 132.10001:9297 132.8:1149 133.8:2407 137.89999:2742 138.8:2745 142.3:2991 143.3:26386 146:16275 146.89999:12436 150…
decane	325	8.71965	1000.66	[57.2]	57.2	11494104	37972540	32355952	106892856			-1	-1	-1	-1	50.3:25620 51.3:103906 52.2:40284 53.2:311411 55.2:1895772 57.2:11494104 58.3:476269 59.2:4469 61.8:3573 63.1:11499 65.1:65305 67.2:231168 69.2:1019503 70.3:2419422 71.2:5319736 77.2:45304 79.2:122112 81.3:53667 82.3:30825 84.2:1598614 85.3:3245229 88:7074 88.9:25548 88.9:23522 91.1:14985 92.2:6374 94.1:12736 94.6:35925 95.2:14426 96.2:7935 98.2:924193 99.2:918495 101.5:566 104:12209 107:13922 10…
Unknown	328	8.72628	1000.91	[81.1]	81.1	31143.1	46459	1.24926e+06	1.86364e+06			-1	-1	-1	-1	50.3:28134 51.3:14006 52.2:33441 55.2:16619 57.2:2482 59.2:1 60.3:1 61.1:0 62.1:3670 67.2:18787 69.2:45776 70.3:20489 71.2:69255 73.1:0 75.1:2902 77.2:9645 81.1:31143 81.1:28418 82.1:68101 84.3:86325 85.3:112468 86.3:96448 87.2:1449 89.9:9357 92.1:8117 93.1:10272 94.2:9279 95.2:16319 98.2:49265 99.3:47047 100.3:8410 101.2:3714 103:1 103:4881 105.1:0 107.1:1466 109.1:5076 109.8:2347 112.2:24703 11…
Unknown	330	8.73072	1001.07	[79.1]	79.1	29082.1	27835.9	495396	474169			-1	-1	-1	-1	50.3:15398 53.2:14490 55.2:11639 60:10823 63.1:10793 64.2:1656 67.2:4737 73.1:7741 77.2:9756 79.1:29082 80.7:14686 81.3:1230 90.2:481 90.9:17906 92:11168 102.8:6775 104.1:8897 108:5454 110.3:10789 110.3:12813 114.3:25803 115:1 116:655 117:5336 118.9:5952 121.1:13155 121.1:12335 125.1:2220 129.10001:2060 130:5567 132.2:8137 133.10001:3207 133.89999:784 140:10735 146.8:9411 148:6558 148.60001:1027 …
Unknown	335	8.74178	1001.48	[83.2]	83.2	71886.9	42869	408230	243444			-1	-1	-1	-1	50.3:4217 51.3:6065 59.1:466 60.5:2374 61.1:7787 66.1:20386 68.2:10115 76.1:29859 80.2:19309 83.2:71887 87.1:1182 89:16859 91.1:2102 95:1490 95.8:2439 105.1:1871 106:4988 106.8:6590 107.8:2290 109:1551 114.7:12383 114.7:14530 118.9:6519 122.1:6128 123.7:2563 124.8:1210 124.8:2013 125.9:1400 128.89999:772 131:893 132.39999:2347 136.8:4478 138.7:950 146.10001:11537 148.7:1881 150.7:1059 153.89999:8…
Unknown	339	8.75063	1001.81	[73.1]	73.1	510392	1.15567e+06	1.21559e+06	2752422			-1	-1	-1	-1	50.2:1 51.2:1 52.2:4140 59.2:83450 60.4:451 61.2:2265 62:1201 65:0 67.3:0 68.1:11171 73.1:510392 74.2:23393 75.1:76187 77.2:0 82.1:1 83.2:1 86.5:20319 89.1:179928 93:0 94:7341 97.2:659 101:3302 102:141 103.1:10785 103.9:8765 104.9:19948 107.9:2490 108.9:1 110:0 110.8:11344 112.2:0 115.4:9530 116.1:14671 117.9:1 118.5:9583 119.4:15146 121.9:6042 121.9:236 123.7:888 127.7:2576 135.8:0 140.10001:0 1…
Unknown	342	8.75728	1002.06	[100]	100	103884	152347	661138	969565			-1	-1	-1	-1	59.2:62832 60.3:3742 61.1:8418 62.1:7032 64.1:2920 68.3:13069 73.1:288 75.1:17503 76.2:20315 80.2:5631 87.1:10741 87.1:20111 89.1:61478 94.2:5291 95.8:2406 100:103884 101.1:14957 101.8:5708 103:20095 103:18138 105.2:15451 106.6:3569 107.8:1672 111.5:4787 115.1:9902 116:9358 118:9859 119:16567 120:3297 121.8:13805 124:1013 127.6:1956 134.2:1034 136.5:1150 139.39999:2903 141:2440 146.8:1 150.7:1 15…
Unknown	345	8.76392	1002.31	[90.1]	90.1	18432.6	18856.2	424134	433880			-1	-1	-1	-1	50.4:4229 51.3:1 52.2:13095 54.3:5909 60.3:5768 61:1633 62.1:1428 64.2:2002 65.1:325 66.2:5459 73.1:38176 75.1:14753 77.1:1890 80.3:9089 81:7018 82.1:962 87.1:14783 87.8:3658 90.1:18433 91:1 93.1:1310 96.1:739 98.7:1040 103.1:6963 103.9:1865 104.4:21674 104.9:14913 106:3018 106.9:1257 109.9:3378 109.9:4489 115:1614 117:409 117.9:492 120.1:14971 121:11576 123.1:3024 124.2:668 126.6:1 127.8:1928 13…
Unknown	354	8.78385	1003.05	[125]	125	8846.9	9633.32	443572	483002			-1	-1	-1	-1	50.3:10405 51.2:0 52.3:0 53.2:17678 55.1:1 56.4:0 57.2:1 58.2:0 59.1:1 60.1:1 61.1:1223 62.2:1 64.3:2314 65.2:2612 66.2:3506 67.1:412 69.2:1 70.1:0 71.2:0 73.1:0 75.1:7390 76.3:12657 77.1:3157 79.1:1142 80.2:110 81.2:9148 81.9:1 82.5:1799 83.1:4269 84:0 85.2:0 86.3:332 86.8:1422 87.6:1 89.2:1 90.9:14610 90.9:11489 93:648 94.8:6452 94.8:5836 96:0 98.2:0 99.2:2088 103:1 103.9:459 104.9:1 105.9:3606…
OCTAMETHYLCYCLOTETRASILOXANE; EI-B; MS	356	8.78827	1003.22	[280.8]	280.8	151914	305431	602100	1.21056e+06	C[Si](C)(O1)O[Si](C)(C)O[Si](C)(C)O[Si](C)(C)1	HMMGMWAXVFQUOA-UHFFFAOYSA-N	528.658	722.598	909.091	760.147	54.3:1896 63.2:5790 86:7387 94.1:3660 97:4448 107.9:900 108.6:2121 111.7:701 117.9:17308 125.4:2544 126.6:759 129.60001:4076 131.60001:3277 132.39999:8162 133:12634 133.89999:7220 134.89999:3639 135.8:1161 138:517 140.5:1105 144:3982 147.7:11368 149.8:1773 151.10001:22 152.8:369 156.3:4360 156.89999:1777 158.39999:2562 159.8:746 162.3:316 162.3:419 164.89999:443 167.10001:1855 168.5:1553 173.6000…
Unknown	383	8.84805	1005.45	[75.1]	75.1	699734	1.94841e+06	2.32166e+06	6.46467e+06			-1	-1	-1	-1	55.2:20511 56:5382 57.2:6979 58.2:10509 59.1:43258 61.1:34352 64.3:1279 66.1:8802 73.1:371326 75.1:699734 76.2:46471 81.1:15381 81.8:15749 85.2:13744 86.1:184 87.3:10768 97.4:778 100.9:43393 109:23 110.2:58 111:7579 115.1:7402 115.8:5921 122.2:25329 124.4:2163 127:3823 129.10001:309493 130.10001:19626 133.89999:2968 138.8:1090 143:32642 145:2141 155.10001:5323 157.10001:317463 159.10001:6078 159.…
Unknown	386	8.85468	1005.7	[143.2]	143.2	9635.23	16119.9	2248858	3762380			-1	-1	-1	-1	50.2:24767 51.2:50440 52.2:33328 53.2:35981 54.2:14545 55.2:18813 56.2:5383 57.2:1 58:14985 59.1:39723 60.2:10353 61.1:33967 63.1:21858 64.2:14953 64.7:12795 65.2:22658 66.2:7175 67:21559 68.1:7215 69.2:4901 70.1:22981 71.2:2733 73.1:332237 75.1:566268 77.2:112457 79.1:162297 81.2:1585 81.2:14802 83.2:3972 84:1 84.5:10993 85:13245 87.2:8877 89.2:0 90:1393 91.2:16064 93:9742 94:19533 95.2:2570 96:…
2,4,6-TRIMETHYLPYRIDINE; EI-B; MS	388	8.85912	1005.86	[121]	121	420805	1.07647e+06	1.40601e+06	3.59673e+06	Cc(c1)cc(C)nc(C)1	BWZVCCNYKMEVEX-UHFFFAOYSA-N	743.886	778.232	523.81	701.656	50.3:1538 51.2:18174 53.2:19751 54.3:15242 63.2:1174 64.2:6840 65:8594 67.2:4148 68.4:2960 77.2:40303 79.1:99083 81:6560 93:16835 94.4:10135 95.1:8825 101.2:27411 102.9:15301 104.2:14581 104.2:13094 106:53578 108.9:831 110:2791 110.9:2798 113:7247 114:7157 116:27224 120.1:316542 121:420805 123.4:351 126.9:3417 129:11217 130.7:1558 136.10001:2095 142.89999:7883 146.8:21584 148.8:3272 150.7:2677 15…
Unknown	410	8.90783	1007.68	[216.4]	216.2	5928.81	7291.93	401257	493511			-1	-1	-1	-1	50.3:5663 54.1:838 58.4:7509 58.4:4485 59.2:0 60:1841 60.6:3620 61.2:1859 62.1:3776 63:274 69.2:2890 71.2:10527 73.1:1 75.1:37661 80.2:28075 81.9:2332 86.1:176 87.1:3532 87.9:6092 88.8:534 90.7:4442 91.2:1283 93:6016 94.1:7526 95:13253 98.1:460 100:1 103.5:10695 104.1:4113 105:2297 106.5:3752 107.4:6567 108.9:2468 113:4563 114.7:3693 120.9:4410 122.9:32 123.6:892 125.8:1626 127.8:240 129.3:0 132.…
Unknown	413	8.91447	1007.92	[117]	117	174459	319388	796037	1.45733e+06			-1	-1	-1	-1	51.3:5403 54.2:7421 55.1:3991 57.2:752 65:10962 66:12666 67.1:4206 68.2:7311 71.2:8854 77.1:26214 78.1:52522 79.2:1638 81:486 82:3741 84.1:9125 87.8:3198 90.3:12202 91.8:14837 95.6:11421 96.4:3450 96.4:3158 97.9:6181 99:5751 100.9:18361 101.9:20708 102.9:8061 110.2:6182 111.2:2797 117:174459 118:28925 119.9:12028 124.1:3132 125.4:907 126.1:356 127:3266 127.7:3611 128.60001:5754 131:9996 131:16135…
Unknown	417	8.92333	1008.26	[146.8]	146.8	37637.9	58836.6	508327	794630			-1	-1	-1	-1	50.4:1 51.3:4172 52.2:9681 53.3:21657 55.1:0 56.2:1 57.2:2008 59.3:0 60.1:2916 61.1:1 61.7:0 61.7:2163 63.2:1367 64.4:2227 65.2:5105 66:5542 69.2:3925 71.1:2578 73.1:1 75.1:0 76.2:61443 81:6427 82.2:192 83.2:1 84:7459 85.2:8863 86.5:7779 86.5:2078 89:0 91.1:0 93.9:3922 96.1:2712 97.1:6447 101.7:25006 101.7:27232 104:0 105.2:8438 107.1:0 111.4:3583 112.4:7153 115.1:1450 117.1:6879 118.9:1 120.2:1 …
Unknown	421	8.9322	1008.59	[224.1]	223.7	5841.29	5670.66	322618	313193			-1	-1	-1	-1	54:915 62.1:2606 65.4:5084 65.9:3489 65.9:5271 67.1:3760 68.1:10692 69.3:499 71.2:10218 80.2:18596 81.3:777 83.9:5680 83.9:6173 87.9:8123 92.1:10912 95:6927 96.3:7494 98.7:3417 102:6171 103:7066 111.7:2582 118.1:10776 120:5846 121.6:7857 123:503 124.1:401 127:1 131.10001:7081 133.89999:3880 134.5:1216 135.10001:352 136.8:9 142.39999:3994 150.89999:1028 152.8:315 153.7:1228 155.8:515 157.39999:785…
Unknown	425	8.94105	1008.92	[71.4]	71.2	52238.9	88248.7	1.14602e+06	1.93601e+06			-1	-1	-1	-1	50.2:2908 51.2:9100 52.2:2875 56.1:4104 57.2:6900 58.2:31785 59.1:27464 60.2:8432 61.2:1962 62.1:0 63.1:211 67.2:7608 69.2:3114 71.2:52239 73.1:289366 77.1:28925 81.1:4437 82.4:3492 83.1:7676 84.3:13966 84.3:15924 87.2:2152 87.2:13194 89:45418 90.4:23231 91:10434 96.7:4308 100.1:8575 102.1:11298 104.1:47780 108.1:3784 111.1:2000 117.2:47678 119:28395 119:76560 123:2232 125.5:2239 126.9:1 127.9:24…
Unknown	427	8.94548	1009.08	[146]	146	323908	665193	1.09753e+06	2253937			-1	-1	-1	-1	50.3:1876 52.2:10477 53.3:53326 55.3:789 56.3:14514 64.2:1590 65.9:25495 70.4:12919 71.3:7079 79.1:3221 80.2:62438 85.9:17496 86.9:5691 90.9:23442 94:9974 95.9:2505 97:2543 98.2:1117 102:108949 105.2:24671 106.4:16037 107:1954 108.7:1416 111.9:186 113.2:544 115:3011 116.3:8124 120.5:63053 120.5:16567 122.7:5430 125:986 126.3:2324 128.39999:2455 131.89999:4633 132.5:8029 133.10001:991 133.7:6699 1…
Unknown	433	8.95877	1009.58	[75.1]	75.1	1.46886e+06	3824189	3857459	10042898			-1	-1	-1	-1	53.3:64749 55.2:30627 56.3:48114 57.3:10262 59.2:154271 60.2:61571 61.2:45467 62.1:10635 67.2:575 68:5532 69.2:11333 70.1:2780 71.3:33824 75.1:1468864 79.1:103819 82.4:9225 82.4:10220 83.1:33931 84.1:0 86.1:28654 89.1:258219 91:34281 95:2166 100.1:114717 102:90392 102.9:12723 104.1:116590 105.2:23584 107:8721 108.4:4085 110.2:944 115.2:1356 116:36844 119.1:195991 120.5:34080 122:16869 123:2901 12…
Methoxyamine, TMS derivative	434	8.96097	1009.66	[86.2]	86.2	31933.3	80047.7	4.2004e+06	10529189			-1	-1	-1	-1	51.2:16124 52.2:58942 53.2:50956 55.2:1179 56.2:9529 57.1:11016 59.2:336404 60.2:14657 61.2:134214 62.3:11084 63.1:18732 64.2:5949 69.3:2330 70.2:50672 73.1:974 74.2:650480 75.1:4408 77.1:1058 79.1:103677 81:4862 82.2:2208 85:1339 86.2:31933 89.1:891065 96:4468 97.6:1320 99:4914 101.1:1783 101.9:51858 104.1:676826 105.9:11608 106.9:2072 107.8:802 108.4:3775 110.1:1954 112:55 112.8:0 117:5951 119.…
Methoxyamine, TMS derivative	435	8.9632	1009.74	[73.1]	73.1	3.28973e+06	7.96345e+06	7.69603e+06	18629772			-1	-1	-1	-1	50.2:20104 51.3:36136 53.3:29063 54.3:696 55.2:19606 57.2:298 58.3:62971 59.2:260068 60.1:42099 61.1:61486 63:8491 63:23229 63.9:8232 65.2:1949 67.1:16395 67.1:6593 69.1:11441 70.1:38720 73.1:3289731 74.1:686733 77.1:74767 81.1:12468 83.1:32303 86.1:813 89.1:896169 91:17706 93.2:0 95.1:3090 96:3451 97.7:3185 100:75137 101.2:25218 104.1:685471 105.9:4054 108:3333 110:3037 111:1997 111:3404 113:0 1…
Unknown	436	8.96542	1009.83	[146.8]	146.9	61589.5	51231.9	805375	669934			-1	-1	-1	-1	52.2:6517 54.2:7668 55.2:2075 58.3:35930 59.2:4159 60.2:9857 62.4:2807 63.2:9336 64.4:2869 67.4:2671 68.3:6732 74.2:336398 77.1:2601 81.5:6224 83:11899 84.1:546 87.4:827 89.1:6765 91.1:14951 94.1:11025 96.7:1315 96.7:207 100:14075 101.3:11124 104.1:21154 107.1:12343 108:1235 109.3:1179 111.9:821 113:72 113.6:1217 114.8:791 117:28455 119.1:9458 121.2:6687 123.2:1396 124:208 126.2:216 126.8:0 127.3…
Unknown	441	8.97648	1010.24	[90.4]	90.4	24163.7	18079.3	522357	390827			-1	-1	-1	-1	53.2:14010 55.2:4234 59.2:2227 60.3:9195 63.9:167 65:1650 67.1:965 69.3:1716 73.1:0 81.1:3355 82.2:204 83.1:4313 83.7:12704 86.9:3708 87.4:5342 89.1:52425 90.4:24164 91.1:5467 93:1020 95:4554 99:4201 100.1:36214 101:10793 101.5:10447 104:30042 105.9:15495 106.8:4148 106.8:6046 108.1:257 109:1738 110:3940 114.3:2894 115.1:3612 119.1:26440 120.1:21781 123:802 123.9:938 125.5:613 127.1:8656 127.1:87…
Unknown	457	9.01192	1011.56	[210.5]	210.7	3537.93	5134.32	406887	590484			-1	-1	-1	-1	55.1:2918 57.8:961 57.8:11575 63.1:4796 64.2:4151 66.2:2323 68:2417 70.7:13486 79.1:13049 80.2:34907 81.2:6058 86:0 87.9:1 93.1:5282 95:0 97.1:2429 97.8:2768 102:6088 103:13606 105.6:1064 107.1:4515 110.7:4698 112:1552 114.3:2763 115.2:3904 116.9:6415 117.7:2803 120.1:8668 125.6:1190 127.9:1253 128.5:571 129.7:169 130.2:7527 131.2:4235 132.8:3529 133.89999:1321 135.8:1128 138.89999:678 139.89999:…
Unknown	484	9.0717	1013.79	[206.8]	206.8	135429	263824	723906	1.41021e+06			-1	-1	-1	-1	50.3:12983 52.2:20873 59.2:2004 59.2:12899 61.1:3801 62.1:2691 64:8211 65:6664 65:9936 67.1:1 67.9:2673 69.3:2664 73.1:9336 76.3:16908 79.2:5680 82:145 83.9:1558 85.9:0 87.1:5782 93.1:0 94.9:1 96.1:17315 96.8:4190 97.6:3416 98.3:3396 99.2:5424 99.9:137 100.8:1659 101.9:1645 103:3675 104:8887 107.6:5571 114.9:149 116.7:6488 120:13349 121.1:23697 123.4:1879 123.4:2027 124.6:0 127.3:973 127.9:2823 1…
Unknown	485	9.07392	1013.87	[208.5]	209.7	719.486	1263.32	527116	925544			-1	-1	-1	-1	51.3:7993 54.2:528 55.1:1 56:1 56:4865 57.1:1 58.4:1 59.2:7951 59.8:7013 66.3:7775 66.3:11463 71:0 73.1:1 74.1:20810 75.1:16928 77.2:7201 79.1:14720 81.1:7208 82.8:4953 85.2:598 86:23360 92:7822 92.9:0 96.2:5791 99.1:9805 101.5:2546 104:7508 104.8:4703 104.8:9951 106.3:5765 109:642 110:2804 112:1544 114.1:1767 114.1:1066 114.9:908 116:3528 118.2:5681 120.1:20405 120.9:21008 122.2:3054 123.7:1159 …
Unknown	486	9.07612	1013.95	[207.7]	207.9	13920.6	18456.5	419715	556477			-1	-1	-1	-1	50.3:2695 51.2:7167 52.2:9603 57.1:1 57.7:5701 57.7:6602 59.1:4985 60.1:2829 62.1:851 63:450 64.1:1 65:5657 66.1:3312 69.2:442 71.2:0 73.2:0 75.1:25410 77.1:24145 79.1:13761 81.2:11888 82.7:2661 83.3:762 84.2:2748 86.1:9411 86.9:3970 87.5:4709 90.9:0 97.2:1041 98.1:29 99.2:5979 99.9:1260 104.9:2854 105.7:1684 107.9:2560 110.1:1272 110.1:709 113.9:422 116:4778 117.8:5807 119:3133 120:10487 122:443…
Unknown	507	9.12262	1015.69	[113]	113	16780.4	35356	376314	792886			-1	-1	-1	-1	51.3:13500 52.2:1 53.3:15600 54.3:4587 55.2:949 68.1:6169 69.3:3493 72.1:8743 74.1:19378 79.2:0 81.1:1103 82:3085 83.2:6575 84.2:5170 84.9:83 89:5137 90.1:7491 91.7:11229 94:6130 96.1:2850 97.4:2450 103.5:702 108.3:315 110.7:808 113:16780 113:17175 113:13373 114.9:13446 117.2:12089 118.4:1451 121.1:1893 122.8:756 123.6:689 128.7:6930 129.39999:4311 134.2:4408 138:1162 140.8:1085 142.5:2854 145.7:…
Unknown	512	9.13368	1016.1	[126.9]	127.3	6439.32	13978	263331	571619			-1	-1	-1	-1	50.3:11245 52.2:15668 53.3:3736 54.2:265 56.1:372 57:482 63.1:2894 63.9:3783 65.2:4330 67:1110 76.2:7728 77.1:750 81.1:3536 83.1:960 85.6:8009 88.9:12745 94.9:3681 95.9:6833 105.9:3106 108.8:2947 108.8:3368 126.4:4386 127.3:6439 128.10001:1174 135.39999:1168 136:1228 137.8:67 146.89999:2164 148.10001:5904 149.8:698 150.7:330 151.39999:2478 152:2179 152.8:43 154.60001:432 156.60001:1336 159.8:1810…
Unknown	526	9.16467	1017.26	[175.6]	175.6	36499.7	49426.8	298595	404349			-1	-1	-1	-1	52.2:11579 54.2:4721 55:4157 55:5063 58.1:11577 62.1:1612 64:3032 68:1335 69.2:2185 71.4:2264 71.4:960 77.1:5345 79.1:2839 82.2:285 84.9:3986 87:9400 95:1564 97.3:499 99.1:1513 101.4:2226 104.9:243 106.9:1625 120.1:5706 123.7:988 124.5:728 127.4:4050 134.60001:1592 135.5:2724 136.10001:25 137.60001:411 138.89999:1050 143.10001:687 146.89999:1798 155:1306 156.39999:1649 158.60001:3510 159.7:195 16…
Unknown	531	9.17575	1017.67	[101.9]	102.1	2873.18	1727.6	342216	205769			-1	-1	-1	-1	50.3:5006 51.3:6392 53.3:11729 54.3:2071 55.3:1470 56.1:5855 57:2702 59.2:165 62.2:5373 63:1419 64.5:1813 66:774 67:4229 67:3205 68.1:2813 70.2:7608 71.6:4990 77.2:1441 78.2:21486 79.1:13516 82:2545 88:1223 89:555 91.1:162 93.1:4601 94.2:787 95:398 96.9:737 101.5:13749 102.1:2873 103:3322 103.8:3194 103.8:1611 105:1841 105.9:3794 105.9:2120 108:143 108:591 109.4:4088 115.8:16357 116.9:9172 118:24…
Unknown	533	9.18017	1017.84	[172.3]	171.9	6161.6	2897.79	351561	165338			-1	-1	-1	-1	50.3:8878 54.2:1484 60.2:721 65.2:6261 66.3:610 67.2:2390 71:1928 71:10890 76.1:33442 82:6504 82.6:6078 84:6208 86.1:5647 89.9:4862 92.2:12533 93:2548 94.9:6152 94.9:6590 96:3293 96.8:559 98.2:2310 101.1:2617 102.8:9520 105.9:1428 107.8:3258 109.2:664 110.4:5511 110.4:1032 114.1:6377 118.8:5596 119.9:7148 123.9:1606 124.8:764 125.7:449 131.10001:6249 132.8:5174 136.10001:233 137.8:948 141.10001:8…
Unknown	537	9.18902	1018.16	[59.2]	59.2	213793	560684	1.46879e+06	3.85198e+06			-1	-1	-1	-1	51.3:9576 52.2:12748 53.3:12693 55.1:7971 56.3:0 59.2:213793 60.2:8490 63.3:3411 65.2:4246 66.1:1336 67.2:6394 68.2:7733 70.9:12456 73.1:167639 75.1:44375 76.1:50161 77.1:1 79.2:1 83.1:3920 84:18294 86.1:151471 87.2:22466 89.2:2836 91:337 92.9:2838 93.8:7155 93.8:7465 96.7:4546 98:12076 100:56927 101.1:15341 103:0 105.6:2729 105.6:4950 106.9:4000 109:1065 110.3:3571 111:9544 112:11357 114:9182 11…
n-Propylamine; GC-EI-TOF; MS; n TMS; RT	539	9.19345	1018.33	[173.9]	173.9	836154	2.21565e+06	2.64566e+06	7010514	CCCN	WGYKZJWCGVVSQN-UHFFFAOYSA-N	827.334	755.071	529.412	851.782	50.3:5209 53.3:26484 54.2:9433 57.2:31140 60.5:14567 61:18343 69.2:9700 73.1:290821 75.1:42249 76.3:41579 81.2:7059 86.1:185660 88.1:11230 89.7:9591 92.1:11597 95:1085 95.9:4346 99:8097 100:78117 102.1:36132 103.1:11794 104.1:7754 105:1494 107.9:3239 110:6590 112.1:15606 114.1:377537 115.2:11943 120.9:115 122.1:3980 124.8:1262 126.9:445 127.9:18713 130:63324 139.10001:1847 139.7:2292 141.8:4088 1…
Unknown	543	9.2023	1018.66	[57]	57	11840.4	15785.7	376536	501998			-1	-1	-1	-1	51.2:23799 52.2:628 55.1:1412 56.2:3261 57:11840 59.1:21 61.1:223 62:4679 65.2:624 66.2:3263 67.7:2364 69.2:3458 70.3:11777 73.1:4256 75:9204 77.1:5839 79.1:14822 81.9:1809 82.7:3874 83.8:3375 86.1:97 88.8:8754 88.8:4957 91:4646 92.4:15876 93.1:1743 96.7:2355 97.4:2902 103.1:4996 107:591 109.2:3215 109.8:1569 110.5:12857 110.5:12903 112.1:1610 112.7:6581 116:7857 117.1:2033 117.9:5009 118.6:20 11…
Unknown	560	9.23995	1020.07	[198.2]	198	21706.5	51264.6	391616	924886			-1	-1	-1	-1	50.3:10602 54.2:2628 56.1:11246 61.8:1938 65.2:6044 66.1:2468 73.1:30093 75.1:1 77.1:5220 79.1:1957 81.1:2174 83:5073 89.2:630 89.2:2500 90.1:1788 91.9:2234 92.9:7699 94:1750 95.1:868 99.1:9755 101.1:1716 101.6:2377 103:7733 103.8:1400 105:6855 106.1:13634 110.1:354 113.2:5533 113.2:5120 113.9:3200 114.5:8821 118:1902 118.9:6667 118.9:10710 120:4928 121:849 123.6:42 124.4:1610 126:2135 128.10001:…
Unknown	570	9.26208	1020.89	[247.7]	247.7	147708	280183	900231	1.70763e+06			-1	-1	-1	-1	54.8:7208 62.1:5678 73.1:82250 76:20970 80.2:24758 82.2:3892 85:6341 88.9:9664 91:7553 91.6:5349 95.1:8537 96.5:2940 97.7:2939 98.4:4189 98.9:8764 103.2:5463 103.8:9044 104.9:0 106.9:4221 107.9:4038 110.2:2189 115.9:9845 116.9:1192 117.7:3191 119.9:61 119.9:2067 121.9:913 123.2:653 124.1:222 125.3:524 126.4:3692 132.60001:1473 133.2:18540 135.89999:46873 141.5:1474 145.60001:54 147.8:2318 149.899…
Unknown	574	9.27095	1021.22	[206.9]	206.9	26530.5	54143.4	511171	1.0432e+06			-1	-1	-1	-1	50.3:7446 51.2:12935 52.2:7974 54.1:2255 55.2:3426 56:1685 57.2:2091 59.1:12146 60.7:363 63.2:8374 64:5158 65.1:833 67.2:7303 67.2:8822 67.9:8700 68.4:9157 70.3:5155 71.1:10740 76.2:31972 81.2:1674 83:6570 86.3:6231 86.3:5291 86.9:1090 94.2:12581 94.2:14174 101.4:774 102:5397 103.8:367 106.1:4183 106.7:3752 110:2076 111.3:136 111.9:3868 116.2:317 116.2:15220 119:6666 127.9:1139 130:0 135.8:19740 …
Unknown	577	9.2776	1021.47	[173.4]	173.4	2102.39	1279.97	387466	235895			-1	-1	-1	-1	50.4:6411 53.2:2995 55.1:595 56.3:2084 58.1:2337 59.1:9168 62.4:2781 63:1 63.7:10786 63.7:3331 65.7:4717 66.4:2896 67.9:3436 69.2:5654 70.6:18751 73.1:0 75.1:0 77.1:3873 79.1:0 81.2:3598 81.9:803 83.9:2145 85.9:3815 85.9:5024 88.1:3471 91.9:3897 94:120 95:1 95.8:903 100:10427 101:713 102.3:5028 103.8:2216 105.3:1826 107.1:1252 108.5:5809 113:683 114.3:3036 115.3:0 116.1:5599 117.2:5422 118.9:3059…
Unknown	589	9.30417	1022.46	[71.4]	71.4	36008.1	96582.3	259617	696354			-1	-1	-1	-1	53.2:16639 55.1:2526 57.2:13821 64.1:6054 70.2:7057 70.2:691 71.4:36008 83.4:13039 84.1:6973 84.9:5460 95.2:1 110.2:1546 110.9:3061 112.4:4072 113:809 120.8:1164 125.8:2794 129.89999:2317 135.8:216 145.7:6032 148:3531 148:13501 148.89999:7427 169:194 180.8:554 184.8:2026 187.5:2263 187.5:402 195:789 202.2:171 213.39999:719 214.7:704 215.39999:551 219.5:949 228.5:192 230.8:654 231.8:58 234.2:1147 …
Unknown	591	9.3086	1022.63	[258.2]	258.6	6433.98	11390.7	462093	818089			-1	-1	-1	-1	51.2:29295 52.2:5031 53.3:336 54.3:5165 55.2:5015 56.3:8737 57.1:21459 59.1:0 61.1:3121 61.1:7404 63.1:1 63.7:282 66.1:2767 69.2:1 70.2:19799 71.3:5146 73.1:0 75.1:0 76.2:34668 77.1:0 79.1:37564 80.2:29757 81.1:1 82:3492 83:2322 83.9:6058 85.6:5773 90:5148 91:1733 92.1:2579 93.1:3285 94.1:2311 95:2770 99.9:1 103:1 105.2:1 105.9:4108 107.3:849 108.9:0 111.2:3813 115.1:0 117:0 117:0 118.9:2274 120.…
Unknown	596	9.31967	1023.04	[347.5]	347.8	1159.07	1559.07	249266	335289			-1	-1	-1	-1	50.2:15162 52.2:8059 54.1:1429 55.1:3468 56.2:1425 58.2:1 62:2153 64:252 64:4595 65.2:3367 67.1:6302 68.3:11957 71.4:72 74.1:26694 76.1:0 79.1:9409 82.1:2309 83.2:841 84.9:2772 88.7:583 89.2:5743 92:2785 94.1:240 97:1569 102.1:8408 108.7:2660 110.7:2403 111.8:666 132:5166 134.3:5477 136.39999:1 158.60001:2304 161.39999:2507 164.2:328 165.5:1123 169.89999:894 169.89999:5798 178.89999:1677 180.8:80…
Unknown	599	9.3263	1023.29	[148.8]	148.8	50336.5	21705	853936	368216			-1	-1	-1	-1	50.3:4008 52.2:4844 53.2:14024 58.1:764 59.2:92 61.2:752 65.3:5329 66.2:3729 68.2:3244 69.2:8970 73.1:133484 77.1:40112 82.3:1384 83.9:1415 86.1:1746 87.1:2995 88.1:2938 89.1:9037 96:1999 100:34394 101.3:8708 101.9:14869 104.1:13604 104.9:9867 106.5:11395 107.9:1907 108.8:1337 110.1:179 115.8:5758 118.9:2708 123.3:2883 123.3:698 124.8:1853 127.2:1712 131:1597 131.8:3803 132.89999:5828 135.10001:1…
Unknown	602	9.33297	1023.53	[263.6]	263.6	46243.8	45492.9	955031	939524			-1	-1	-1	-1	50.3:2687 51.3:12271 52.2:24705 54.3:6144 58.2:17957 59.3:2989 60.1:418 62:6259 66.2:9965 67:5008 69.3:21835 73.1:0 75.2:1668 77.1:28160 79.1:8267 82.2:3684 82.7:6650 86.2:36545 87.2:2733 87.9:14512 89.2:1689 93.9:4528 95:11523 98.2:3846 100:21007 103.1:3275 103.9:1151 104.9:41138 109.8:3255 115.8:16325 117:1545 120.2:27658 123.5:2547 126.8:5977 132:28936 132.89999:2609 133.8:17298 135:9879 136.8…
Unknown	604	9.33738	1023.7	[59.2]	59.2	61109.9	133747	1.79486e+06	3928284			-1	-1	-1	-1	50.3:21683 51.3:8631 55.2:4988 56.3:9531 57.3:0 58.3:26912 59.2:61110 60.3:9694 61.1:20389 63.2:22650 64.1:8941 66:44126 67.1:3685 68.1:4783 69.2:11098 75.1:28180 77.1:23650 79.1:55244 81.1:25000 83.2:4261 83.9:12930 89.1:11687 90.2:12546 91:5735 97.3:4201 100:5392 101:20776 103.2:45427 105.8:6853 106.4:1 107.1:18809 107.9:4732 108.9:7201 110:797 110.8:755 112.5:7829 113:9895 115.2:84527 115.2:85…
tris(trimethylsilyl)carbamate	606	9.34182	1023.87	[73.1]	73.1	2117528	4.50409e+06	9139053	19439238			-1	-1	-1	-1	52.2:20532 53.3:45027 55.1:7212 59.2:11283 61:20605 63.2:21423 66.3:44121 69.3:38011 73.1:2117528 74.3:130477 75.1:152615 77.2:651445 79.1:44802 84:2905 86.1:29321 86.8:30432 86.8:36154 87.9:9955 90.1:14379 91:4733 93:7471 95.1:5544 95.9:3285 95.9:13809 100:411465 101:27472 102:2346 102.9:40983 104:41540 104.9:37075 106:3060 107.8:6806 109:8945 109.9:3666 111.3:1145 113.1:1471 114.9:16674 116.1:2…
Unknown	608	9.34623	1024.03	[178.2]	177.9	27625.8	55529	1.56739e+06	3.15053e+06			-1	-1	-1	-1	50.3:17599 52.2:2211 56.2:5961 57.2:1039 58.1:20401 63.1:1814 65:8013 66.3:27481 67.2:6361 69.2:43472 71.2:8982 74.2:157837 77.1:43650 81.1:10669 85.2:5429 86.1:17507 88.1:7774 89.2:14609 91:2979 93.1:14985 93.1:15656 95.9:8643 98.2:2884 100:29750 101.9:28711 103.8:44588 103.8:40912 105:521 107.9:6812 107.9:3951 109.1:5148 109.8:885 111.4:2592 119:7592 123.8:4650 132.89999:95369 135:47564 137:210…
Unknown	611	9.35288	1024.28	[263.8]	263.6	15804.8	18981.2	386342	463990			-1	-1	-1	-1	50.3:28884 51.2:1 52.2:0 53.3:14490 54.2:0 57.2:1 59.2:1239 60.2:936 63.2:4213 66.2:4810 69.4:1959 81.1:5893 84.1:13566 95.1:4921 97.1:732 98.4:3894 100:5136 102.9:4936 104:332 104.8:3472 106.9:21793 108.8:2448 109.9:1191 111.1:244 111.1:142 112.8:1560 114.8:95 116.1:10339 116.9:12747 120:2485 122.1:524 127.1:5008 128.60001:677 131:3263 133.7:4370 134.8:1779 134.8:6163 137:817 138.8:2538 140.8:55…
Unknown	612	9.3551	1024.36	[159]	158.9	8633.78	7305.52	497822	421235			-1	-1	-1	-1	50.2:17785 51.2:0 55.1:3501 61.3:2149 64.1:210 65.2:3923 67.9:11590 75.1:2968 80.3:31081 83.1:3019 84.1:8623 84.1:9749 89:2319 89.9:9645 93.8:3780 95.1:9439 96.1:1739 97.3:3446 101.4:3870 104.6:12508 104.6:4136 106.9:18679 107.9:5251 110:934 113:2714 116:16222 118.1:3098 121.9:2251 123:2704 123.9:2831 125:2363 125.6:209 127.2:814 132.8:224 139.5:2246 141.10001:2666 146.89999:22013 149:18578 158.8…
Unknown	616	9.36395	1024.69	[243.3]	241.6	1231.3	849.748	174964	120747			-1	-1	-1	-1	51.3:6098 54.4:7457 58.1:3543 60.2:668 62.2:4560 67.4:1699 82:4066 82.9:1313 84.1:0 94.1:2144 98.8:1925 101.4:3420 107.8:0 109.2:1 112.4:4450 118:2777 124.1:1827 126.4:1187 127.3:0 128:2622 129.8:6950 137.8:4549 156:1 158.89999:1466 162.7:893 166.7:156 170.89999:7760 180.7:1068 180.7:203 184.8:777 202.10001:473 212.39999:1 214:1 217.89999:698 229.60001:398 232.5:521 235.89999:827 236.5:392 240.8:…
Unknown	623	9.37945	1025.27	[93.1]	93.1	2870.05	4406.84	286840	440430			-1	-1	-1	-1	51.2:3822 52.2:10154 55:108 55.8:5159 56.3:3995 57:0 59.1:1 61:0 65.4:2604 69.2:0 71.2:3390 76:46979 77.1:1 81.1:170 82:5224 82.8:2476 88:1891 93.1:2870 94.2:6893 95.1:2841 95.9:1 96.6:4227 97.1:3364 98.3:3603 100:0 102.2:1 103.1:632 104.9:4445 108.4:451 110.7:2431 118.8:1168 119.9:13622 123.1:776 126:1416 127.7:0 131.7:3287 132.8:0 132.8:0 134.39999:5949 134.89999:0 136.60001:1 137.7:1194 142:18…
Unknown	625	9.38387	1025.43	[79.1]	79.1	141491	310848	419982	922678			-1	-1	-1	-1	50.3:13759 51.2:13190 54.3:2761 56:1 57:0 58:0 62.3:9099 64.4:7866 65.1:9294 65.1:8472 67.2:4113 68:714 79.1:141491 82.8:2695 83.5:1 85:0 86:1 88.8:1540 88.8:3341 94:6466 94:623 96.4:1 97.9:1 104.1:64 106:1 110.1:0 113.4:1042 114.2:6337 121:30443 126:928 128.5:0 130.10001:1092 131.8:857 136.5:1 140.5:1011 140.5:2631 142.3:363 152.10001:3985 153.60001:1 156:0 161.39999:213 163.5:761 166:578 169.8:…
Unknown	627	9.3883	1025.6	[106]	106	450835	1220300	1.15035e+06	3.1137e+06			-1	-1	-1	-1	50.3:116 53.3:7798 60.1:339 61.4:1272 61.4:568 63.2:10615 64:8164 65.1:15477 70.1:1675 71.3:3250 76.1:46959 77.1:26097 79.1:9770 81.2:5335 82.3:155 83:0 84:750 87.3:872 89:6467 89.9:17822 91.1:25275 91.8:14396 93.1:21423 95.8:1545 98.8:5207 101.2:4096 102:424 103:3405 104:2288 106:450835 107.1:16887 114.3:7393 117.7:9000 119.9:31468 121.1:215705 122.1:5785 125.5:481 129:5814 130.2:8223 135.60001:…
Unknown	631	9.39717	1025.93	[90.2]	90	19912.4	42187.7	437523	926964			-1	-1	-1	-1	50.2:13288 51.2:3799 52.2:0 55:2198 56.2:2793 57.3:5156 58.3:0 59.1:1 61.2:0 63.2:3579 63.8:3627 64.4:5997 65.2:2813 65.9:1018 67:1811 67.9:5441 69.4:1 70.2:11055 71.1:4113 73.1:1 74.2:20892 75.1:1672 77.1:0 79.1:2203 81.1:3917 82.2:3712 83.4:3044 84.4:1 85:1 86:0 86.8:2819 89:0 90:19912 91:11248 91.9:18726 94.9:1033 96.1:1049 98.6:3019 100.1:0 101:3361 101.6:2543 102.2:7033 103.1:1 104.1:1 106:1…
Unknown	647	9.4326	1027.25	[72]	72	6696.07	4601.43	276773	190194			-1	-1	-1	-1	53.3:5434 54.1:2055 55.3:3446 56.4:1 58.4:3286 59.1:2517 60.9:788 63:0 65.9:1 69.2:1314 70.8:285 72:6696 73.1:1 75.1:14676 77.1:0 78.2:7532 81.2:3968 83.7:155 85.8:785 86.9:2608 88.8:1526 95.1:1286 95.1:306 97.9:876 99.8:1 100.7:3687 102.3:0 103:1928 104.7:5879 107.7:12913 107.7:5644 110.3:1878 111.4:894 112.1:2905 112.8:1889 113.4:2387 114.9:0 116.8:11386 116.8:7983 122:4280 123.8:433 124.6:449 …
Unknown	661	9.46358	1028.41	[145.8]	145.8	12365.1	10281.9	248459	206598			-1	-1	-1	-1	50.3:8617 51.3:6541 53.2:8865 54.1:1 55.2:2804 56:2541 62.1:3902 64:1130 65.1:1362 66:896 66.8:1812 74:3476 76.1:5630 80.3:24583 81.1:9109 82.2:3273 84.9:1406 86.1:4559 93.9:207 94.9:6203 96.1:1302 97.1:3310 99.9:2239 101.2:2272 109.7:46 110.2:3443 113:1255 116:851 117.6:4640 118.9:2985 123:587 125.6:547 128:490 129.10001:1631 131.10001:43 132.3:1221 132.3:2253 134.8:421 136:723 136.8:523 139.600…
Unknown	672	9.48793	1029.32	[150.6]	150.6	2099.24	2027.72	202852	195942			-1	-1	-1	-1	51.2:10612 52.2:23433 58.1:414 65.2:8407 80.2:8304 86.2:7429 88.1:1331 89.9:106 90.8:575 90.8:1278 100.9:28 101.4:1770 102.1:3228 108.5:3630 110.6:1188 111.2:507 111.2:179 112.5:1013 114.7:5564 115.9:2250 120:7199 120:1810 122.5:2033 125.7:1733 126.6:554 129:989 133.5:3214 143:2274 149.8:585 150.60001:2099 151.2:3071 152.7:2070 154.10001:563 154.8:1071 159.89999:2719 164.60001:432 165.39999:2034 …
Unknown	693	9.53445	1031.05	[77.3]	77.1	122548	173495	335027	474309			-1	-1	-1	-1	77.1:122548 80.2:20091 81.2:1 89:5423 100.9:161 103.9:3901 103.9:1732 107.1:3705 108.9:6015 113.9:649 115.9:5872 123.1:748 131.89999:2210 144.2:2281 153.89999:66405 158.3:542 169.7:558 179.7:1259 182.10001:110 182.10001:331 183.2:34 184.39999:24 185.8:259 188:714 193.60001:2396 202.10001:728 209.89999:4605 224.8:1000 228.7:375 236.60001:39 239.3:215 241.39999:173 243:263 248.10001:1190 252.7:834 …
Unknown	697	9.5433	1031.38	[123.1]	123.1	32027.8	23905.8	562370	419756			-1	-1	-1	-1	52.2:44 53.2:17307 54.3:8560 55.2:1233 56.1:7175 67.2:1650 70.3:12582 76.1:23805 80.3:16153 83:1060 86:22016 93:3684 94:16326 98.2:29357 99.9:14318 104.3:2743 107:221 111.9:3727 114.2:3251 116.4:12081 122.1:664 123.1:32028 123.7:20085 127.5:60 130.2:9691 136:1059 137.10001:5643 138:1223 138.8:3510 142:3833 147.8:5087 148.5:193 156.10001:1534 157.8:1359 162.10001:2507 166.89999:19407 169:907 171.6…
Methyltris(trimethylsiloxy)silane	702	9.55437	1031.79	[204.4]	204.8	8857.44	4624.75	13439791	7017338			-1	-1	-1	-1	50.3:3208 51.2:25176 52.3:6475 53.2:4642 54.2:4195 55.2:871 57.1:18298 58.2:8124 61.3:3689 62.2:11894 63:15988 63:5855 65.2:5130 66.2:94138 67.1:107930 69.1:126144 76.2:49275 78.1:19991 79.1:29371 81.1:1085 82.3:7307 83:160379 85.1:5932 87:208 88.1:743 92.2:8660 93.2:8691 95.1:143507 96.1:14297 97:9579 98:25056 100.1:281 102.1:4904 103:2072 103.7:15723 104.9:13905 107.9:5965 112.3:4904 113:2404 1…
2-Hydroxypyridine; GC-EI-TOF; MS; n TMS; RT	703	9.55658	1031.88	[151.9]	151.9	10210703	23528520	20594800	47456592	Oc(c1)nccc1	UBQKCCHYAOITMY-UHFFFAOYSA-N	794.823	825.477	764.706	878.516	50.3:54903 51.3:291520 52.3:95308 53.2:18662 55.2:71519 56.2:14540 57.1:24222 59.1:174401 60.2:35253 61.3:34524 62:28768 62:25150 63.1:5425 64.2:22986 65.2:45459 66.2:87655 67.2:107800 69.1:125625 70.1:53818 71.1:59582 73.1:581847 75.1:208323 78.2:1317593 79.1:161278 80.2:28920 81:77081 82.2:40715 83:163329 84:94276 85.1:28617 86.1:21443 88:1634 89:19607 92.1:123492 93.1:120368 95.1:137417 96:929…
Methyltris(trimethylsiloxy)silane	707	9.56545	1032.21	[206.8]	206.8	7162226	14633971	18535970	37872984			-1	-1	-1	-1	50.3:4172 53.2:26493 54.2:41 56.3:4612 57.2:1877 58.2:34277 59.1:151807 60.2:16497 61.2:7486 62:13197 63:19464 64:21789 65.2:14145 66.2:11157 69.2:6946 70.1:6709 73.1:4786482 75.2:238360 79.1:49166 83:2922 84.1:15557 85.1:30947 86.2:25193 87:47719 89.1:7519 91.1:22828 92.9:5581 95:2627 96.2:101986 97.1:14765 100.9:2444 102.1:1645 103.1:49387 106:29242 108.1:6881 109.2:10056 110:3486 111.1:11618 1…
Unknown	709	9.56988	1032.37	[133.8]	133.8	33235.6	26736	1.08271e+06	870977			-1	-1	-1	-1	51.2:13426 52.2:5737 54.2:7661 55.1:8592 57.2:63 61.2:8554 66.2:799 67.1:7722 71.3:3001 76.2:22021 77.2:130167 78.2:212821 79.1:2560 80.2:79261 81.1:10037 82.1:7073 83.1:2788 85.1:3953 87:10307 88:5056 89.2:26947 91.1:17527 92:17145 94:26422 95.1:8094 100.1:16917 101.1:5801 101.7:3098 103.1:5297 104.4:10217 106.9:7120 112:2282 116.9:1243 121:6107 124.1:6948 125.6:3387 130.89999:431 133:7020 133.8…
Unknown	713	9.57873	1032.7	[208.8]	208.8	93482.9	50089.1	722444	387093			-1	-1	-1	-1	54.6:4722 56.3:11534 56.3:3442 68.1:16384 77.2:88619 87.2:6574 91:7620 101.9:178 103:5848 104:14793 104.9:5641 106.9:3654 116.8:314 117.9:45679 118.9:23948 120.1:6237 120.7:9547 125.6:238 128.39999:4527 129.2:3694 134.89999:8062 139.8:1863 142.89999:969 147.89999:5504 150:1837 155.10001:3176 157:1332 159.89999:878 161.60001:3010 163.7:5711 168:12234 171.89999:896 174.39999:13965 178.39999:7075 17…
Unknown	735	9.62743	1034.52	[89.1]	89.1	62564.5	139690	421583	941280			-1	-1	-1	-1	64.3:6709 65.4:9959 65.4:8931 73.1:53901 83:3740 84.3:7735 87.9:3059 89.1:62565 90:9541 98.2:4695 100:20011 100.8:4186 101.6:872 103.9:11168 103.9:1808 105.6:345 109.2:4676 112.1:0 114.3:9563 116:2687 120.9:989 125.2:1812 125.8:1618 132.10001:1408 143.2:5115 144.2:902 146.89999:18936 148.39999:6078 153:9699 156:8888 158.2:5966 161.60001:430 165.3:1433 167.5:4395 171.89999:0 176:12117 180.8:33 181…
Unknown	742	9.64293	1035.1	[74.2]	74.2	40887.8	47949.3	470582	551855			-1	-1	-1	-1	50.3:1 51.2:5751 52.2:11625 53.2:0 56.2:3171 56.9:4352 58:6861 59:15844 59:12477 60:1858 61.1:2555 61.1:9079 64:3887 65.1:1 66.2:2902 67.2:343 71.1:530 73.1:1 74.2:40888 75.1:11828 76.1:34739 77:0 79.1:21691 80.3:23844 83.8:4930 85.1:1378 86.1:0 87:259 87:2935 89.1:25 90.6:7905 91.1:4845 92.2:12052 96.1:1 96.8:2523 102.1:3208 103.1:2273 105.1:693 106.8:8809 108.7:2273 111:0 114.4:2589 115.1:1101 …
Unknown	768	9.7005	1037.24	[144.1]	144.1	21406.6	46680	512383	1.11732e+06			-1	-1	-1	-1	50.2:3201 51.2:5926 52.3:17137 53.3:21105 54:416 57.4:4261 58.9:3463 61.1:614 64.2:1734 64.8:2829 68.4:1707 70.2:3737 71.4:3925 73.1:10502 75.1:1 77.1:8212 79.1:0 83.9:721 84.7:2100 85.5:906 87:1162 90.8:874 94.6:2100 95.1:4821 95.1:15196 95.6:3574 96.1:1528 104.7:1461 105.4:6928 107:913 108.2:783 108.8:1 110.7:7270 112.4:2242 113.2:716 114:3674 116.7:11153 120.2:11962 120.2:3033 121.3:7924 122.1…
Unknown	772	9.70937	1037.57	[234.9]	235.3	1874.46	1877.67	511180	512056			-1	-1	-1	-1	55.2:3109 57.1:219 58.3:6043 59:6146 60.1:3271 61.1:1153 61.9:2202 63.2:2854 67:2787 68:2583 69.3:11074 70.3:3207 70.9:2643 76.2:73556 77:11023 80.9:992 84:2410 86:5792 87.1:512 88.8:3534 90.2:657 91.1:10650 93.1:3298 96.4:996 99:2259 99.7:1218 100.2:8466 100.2:10099 101.8:1712 103.4:6445 103.4:8119 104.1:4350 106.9:5166 107.6:5413 108.9:1138 109.6:6563 110.5:5542 110.5:423 111.7:1669 114.9:3049 …
Unknown	781	9.72928	1038.32	[317.8,73.1]	317.8	298594	616147	2.20315e+06	4546177			-1	-1	-1	-1	50.3:16178 53.3:14734 54.2:7289 55:1452 56.3:5388 57.3:4040 59.2:10935 63.1:3954 63.8:5887 65:779 69.2:10243 71.1:5353 73.1:252260 74.2:18906 75.1:23226 77.2:116272 79.1:7784 81.9:2828 83.9:9 84.9:6078 86.5:9110 87.2:6668 88.4:2071 89.1:610 90:6817 91:6999 92.3:4408 95.1:1024 96.1:7057 97:22417 98.2:12340 99.9:7239 101.2:2846 102:2110 103.2:12781 105.1:90932 107.9:5966 107.9:706 109.1:3888 110.2:…
Unknown	785	9.73815	1038.65	[253.6]	254	1384.5	1262.71	495595	451998			-1	-1	-1	-1	51.2:9642 52.2:3621 54.3:996 59.2:29 60.3:523 61.3:2380 62.1:2742 66:4311 66.9:920 69.3:3877 70.2:625 71.4:5998 76.2:34702 80.2:3487 81.1:3255 83.9:2086 86.1:994 87.1:774 88:1615 89.1:4420 89.6:2630 92.3:3199 95:1830 98.9:3141 100:1441 101:1282 101.9:4397 102.8:2794 105:8656 106.6:979 110.5:1749 112.6:1017 114.9:3163 116.2:3385 117.9:4466 119:3099 120.7:1661 122:0 125:423 125.8:1404 127.4:2601 12…
Unknown	789	9.747	1038.98	[207.6]	208	6858.28	11043.6	285763	460151			-1	-1	-1	-1	51.3:20621 54.2:4061 56.2:2992 57.9:391 59.1:735 60:76 60.9:2952 60.9:2813 62.2:2612 64.2:1404 65.4:1242 67.9:2482 69.2:3224 71.1:2943 71.8:5546 73.1:1396 75.1:907 81.1:6347 81.9:4045 83.8:0 86.1:1546 89:1885 91.7:9133 93.1:2141 97.9:181 100.1:1825 100.1:782 102.3:5763 103.2:4717 105:3547 105:3426 108.7:1423 110:403 111.7:928 116.9:3770 118.2:7929 118.2:5593 119.1:1392 121.8:537 122.6:2670 122.6:…
Unknown	795	9.76028	1039.47	[122.7]	122.7	14340.2	33908.4	277211	655487			-1	-1	-1	-1	52.2:3907 53.2:2947 54.2:228 55.4:4431 55.4:4346 56.1:3024 57.3:5914 58:3194 63.1:78 67.3:1628 68:4808 70.6:1062 75.1:11975 89.1:10044 92.9:12291 94.3:796 94.9:2478 94.9:10111 96.2:232 96.9:3006 98.8:1237 105.2:10441 106.1:4272 107:2095 112.9:1195 113.9:2531 115.8:6990 117.9:106 119.6:1574 122.7:14340 122.7:16643 124.9:4201 127.9:2900 128.89999:1047 139.60001:156 150.2:5707 165.89999:206 167.1000…
Unknown	799	9.76915	1039.8	[145.4]	145.8	10721.7	12570.8	240270	281709			-1	-1	-1	-1	50.3:12436 51.2:5264 53.3:17583 56.1:2899 58.1:2287 60:824 60.9:3417 63.8:3306 64.3:0 70:5537 79.1:5686 80.2:13957 81:2539 82.9:760 83.9:1875 90.7:4778 91.8:3728 96.2:812 97.9:1924 99.9:138 100.7:2684 104.3:0 107:831 107.9:816 109.5:437 110:1787 111.1:2084 112.2:2841 116.1:1150 116.7:3428 123.1:355 123.1:2948 124.9:655 126.5:879 129:2033 131.8:1746 135:185 138.10001:201 138.8:0 138.8:195 140.6000…
Unknown	825	9.82672	1041.95	[169.2]	169.1	9239.05	9872.22	284802	304320			-1	-1	-1	-1	50.2:3011 51.3:12909 52.2:1 53.2:12775 54.2:2533 58.3:1 66.2:399 67.9:834 75.1:5393 78.1:43161 80.2:39586 83:1360 85.3:1640 85.9:2478 90.3:570 95:4355 96.9:609 98.2:2093 99.3:1152 101:593 103.1:306 105.9:3597 109:729 110.2:3389 112.9:1 114.1:3247 115.4:6939 116.1:1 119.8:3061 119.8:1224 122.7:816 123.7:430 125:461 125:1448 126.8:2306 127.7:190 130.5:0 131:948 133:713 133.89999:427 134.7:1316 137.…
Unknown	843	9.86658	1043.44	[127.1]	127.1	17073.8	24584.1	318562	458689			-1	-1	-1	-1	50.3:2185 53.3:8199 54.3:38 55.1:4009 56.2:831 58.4:4861 59.1:5094 60.2:143 63.1:419 70.1:6079 73:11256 80.3:29951 82.9:1653 84.1:998 85.1:2100 85.9:854 86.6:1349 91.1:3242 93:459 98.2:1377 99.2:11114 99.2:9847 101.2:2756 103.1:1183 104:344 105.5:1173 106.2:2735 107:2570 110:2158 115:4220 116:1671 118:2413 120.1:86 122.2:3016 126.6:6171 127.1:17074 127.8:403 128.89999:2171 130.7:1462 131.39999:81…
Unknown	898	9.98837	1047.98	[156.7]	156.7	18228.8	34209.5	349341	655599			-1	-1	-1	-1	50.2:11537 52.2:648 57.3:4366 60.1:3211 61.8:3825 64:0 65.9:1260 70.9:11251 70.9:16848 76.1:33709 81.1:3112 83.3:1246 84.1:3536 84.1:1862 85:5668 85:749 90.9:1585 93:1315 94.5:10802 99:4576 100.7:5343 106:5723 106.8:732 109:180 110:28 111.7:2248 112.9:1955 114.5:4408 115.8:2637 121:3669 122.3:1 123.3:955 124.2:1813 125.8:0 126.5:735 128.89999:16185 130.8:3670 132.2:1446 133.60001:90 135.60001:253…
Unknown	909	10.0127	1048.89	[213.9]	213.9	116194	255235	635831	1.39668e+06			-1	-1	-1	-1	51.2:398 53.2:20692 55.2:15530 57.2:9116 59.9:0 64.1:487 64.9:3176 66:5 67.2:4076 69.1:10630 73.1:1 77.1:58176 81:7844 82.8:787 84.1:18072 85.1:18708 86.9:4490 89.2:1 96.8:264 97.9:4523 103:4237 103.8:9124 105.8:5369 109.7:1846 111.1:2467 112.8:917 113.4:1143 114:0 115.1:15200 116.2:3563 117:0 122.2:975 123.8:2708 124.4:3142 131:5962 131:632 133.8:2773 134.60001:0 136.60001:358 137.89999:878 139.…
Unknown	914	10.0238	1049.3	[120.1]	120.1	44747.9	91472.1	552892	1.1302e+06			-1	-1	-1	-1	50.3:23609 52.2:0 55.3:1373 56.1:1 57.2:1694 58.3:10315 63.3:7697 64.2:5299 66.2:4016 67.1:1381 68.3:647 71:20285 77.1:41207 81:3859 87.1:9560 87.9:6508 90:4029 90.8:1 91.3:1834 92.3:11123 93.1:4332 95.3:8885 99:9360 100.9:8990 104.9:6049 107.6:4169 108.9:314 110.9:4104 115:14098 117.2:1 117.9:4628 119:5060 120.1:44748 123.1:2304 125.2:2619 125.9:2510 126.9:476 131.39999:12434 132.8:1 135.39999:4…
Unknown	919	10.0349	1049.71	[331.6]	331.6	9920.36	19260.8	762009	1.47947e+06			-1	-1	-1	-1	51.2:7164 53.2:36086 54.2:8701 55.1:7498 56.2:10528 59.2:18811 61.4:17735 61.4:17994 64.1:2366 66.9:2299 69.3:2975 70.1:11110 73.1:49 74.2:10743 76.2:57070 82:1659 82.9:3613 83.8:14531 84.8:8169 87.2:5343 88:810 89:456 94.8:3055 97.4:4781 100.1:11962 102:24519 105.3:5802 106.1:766 106.9:3804 109.8:725 110.3:676 111.4:56 114.3:877 114.9:19183 122:7978 123.8:553 127.4:817 130:14346 137.10001:3093 1…
Unknown	922	10.0415	1049.96	[116.2]	116.2	24520.8	39877.2	1.43384e+06	2331792			-1	-1	-1	-1	50.3:16908 51.2:3124 52.2:17971 55.1:11409 56.2:11972 57:1 58.3:242 59.2:29405 60.3:261 61.2:10924 62:8763 63.1:3888 68:10187 69.1:4744 70.2:27577 71.1:9478 73.1:2 76.3:24119 79.2:54422 80.2:29160 81.2:4598 82.7:260 86.1:35361 88:4375 89.8:5390 90.9:4702 92.1:8889 93:4076 95:1533 97.9:977 99:7994 100.1:60645 101.9:7990 102.7:4184 106.1:1794 106.8:1236 109.9:2027 111.8:1325 112.7:490 114.3:7328 11…
Tetrasiloxane, decamethyl-	927	10.0526	1050.38	[73.1]	73.1	2.63714e+06	6.6738e+06	6.50766e+06	16468899			-1	-1	-1	-1	50.2:14730 51.2:29187 52.3:21389 55.1:37582 56.2:33263 57.2:19082 58.2:20499 59.1:158779 60.3:29751 61.3:47786 63.2:2236 64.1:16876 66.1:3585 67.1:40 69.1:17359 70.1:85880 73.1:2637144 75.1:284119 76.1:20572 77.2:45800 81.2:4507 84.2:26507 85:15199 86.2:95043 89.1:6137 93:3979 96.1:22390 97.6:4756 100.1:146858 102.1:22587 102.8:18811 102.8:30791 104:7952 106.2:5591 106.9:4662 109:3079 109.7:1869 …
Unknown	928	10.0548	1050.46	[264.4]	264.5	10342.4	17933.9	1.71915e+06	2.98104e+06			-1	-1	-1	-1	51.3:13625 52.2:21953 53.3:23728 56.2:12780 57.2:3326 59.1:49596 60.3:4902 68.2:4606 70.2:11393 73.1:170376 78.1:8367 79.1:27324 82.3:6381 86.2:26099 94.9:5174 95.5:7882 96.2:9935 97.2:5510 100.1:60163 102.1:12213 103:2973 106.1:6656 106.7:8541 108.8:3029 112.4:2279 113.5:4727 114.1:5009 114.9:21479 116.9:40876 118.1:2813 119.2:3364 123.9:3592 124.5:1469 128:2858 130.10001:317929 132:3605 132.8:1…
Unknown	931	10.0614	1050.71	[206.8]	206.8	1.34678e+06	2750308	3.02134e+06	6170002			-1	-1	-1	-1	51.2:264 54.2:9098 58.2:22334 65.2:3614 66.9:8012 69.3:6829 74.2:20492 77.1:36173 82.2:5032 83.9:3299 84.7:20657 84.7:18786 87.3:19780 88.9:22596 95.7:10423 97.7:1460 103.1:3079 103.1:32849 104.8:1527 105.9:7407 106.9:3073 107.6:3942 111:106 112.4:2947 113:2839 113.7:12145 114.9:20136 114.9:28816 115.4:15432 118:12638 120.2:13283 121.7:6998 122.2:5754 123.9:9695 125.3:5275 127:7209 132.8:22071 13…
Unknown	934	10.0681	1050.95	[232.8]	232.9	3740.34	5635.68	826265	1.24496e+06			-1	-1	-1	-1	50.3:1862 54.3:3571 56.1:8428 57.3:6287 58.3:29 59.1:7203 61.2:22917 62.9:9126 62.9:10154 65.3:267 67.1:922 68:7068 70.2:9476 71:13764 73.1:36439 74.3:65784 75.1:43502 76.1:28058 79.1:38090 80.2:36019 81.1:2433 82.8:318 86.2:6853 87:464 89.1:1353 90.9:7985 92.3:18545 92.3:21216 93.2:4015 94.8:1850 100.1:8017 107.8:3332 109.1:1314 110.8:4933 114:1789 115.9:419 117:2860 119.3:8949 120.1:7291 120.9:…
Unknown	939	10.0791	1051.37	[231.7]	232	5960.68	6630.58	329324	366336			-1	-1	-1	-1	50.2:2483 52.2:16579 53.2:1349 54.2:7412 66.1:9317 67.4:816 77.1:7743 80.2:6397 81.3:4633 82.2:1135 87:2415 89.1:5926 93.1:8680 93.8:5105 93.8:1782 98.8:4463 104.5:9128 107.9:1542 108.5:2804 110.2:876 110.2:2044 111:0 124.5:1567 125.8:490 126.5:5129 127.1:8462 135.89999:441 137.5:313 138:759 138.8:1269 139.8:174 141.89999:1204 143.2:763 145.10001:36 146.8:4046 148:9011 149:427 149.8:2007 154.8:58…
Unknown	944	10.0902	1051.78	[208]	208	7789.66	6954.13	289753	258674			-1	-1	-1	-1	50.2:2918 65.1:76 66:1 67.1:1544 76:44458 78.1:11664 81:1972 95:633 95.8:451 105.9:4272 115.1:9661 123.9:1241 125:1636 130.89999:3827 131.8:2323 133.10001:1119 136.2:260 137.7:1418 139.3:1501 140.10001:1000 140.10001:1330 142:1509 143.2:324 144.10001:2515 146.89999:21857 148.89999:4390 153.2:1351 154.89999:1672 156.2:1290 163.7:1227 168.3:1160 169.7:3201 176.7:1 177.60001:751 183.3:176 188.3:8697…
Unknown	962	10.1301	1053.27	[89.1]	89.1	24175.6	18387.1	406650	309283			-1	-1	-1	-1	51.3:4124 52.2:2653 54.1:9077 76.2:57886 88:3761 89.1:24176 89.1:29777 94.5:5607 94.9:4178 95.9:6736 103.7:970 105.1:9277 107.9:337 110.2:970 118.7:17797 121:2965 121:4564 124.7:693 124.7:1003 127.7:2809 128.89999:3944 134.60001:10326 136.60001:73 137.2:1702 137.2:891 138.39999:1166 139.10001:987 139.10001:1968 141.3:160 143.89999:3411 149.10001:62349 150.2:5365 151.7:1676 152.60001:1407 164.8:11…
lactic acid	975	10.1588	1054.34	[73.1,146.9]	73.1	10556807	20006406	38698660	73338568	CC(O)C(O)=O	JVTAAEKCZFNVCJ-UHFFFAOYNA-N	747.014	878.661	708.333	870.452	50.3:5527 51.3:49401 52.2:97846 55.2:129317 58.3:258078 59.2:599658 61.2:185936 63.2:13935 66.2:940428 68:11680 73.1:10556807 74.2:367752 75.1:1724180 77.1:67913 79.2:44398 83.1:2278 87.3:198042 88.1:538123 90.1:2936 91.1:12479 91.7:8664 94.4:49438 94.4:24042 96.8:4257 99.1:40201 101.1:341023 102.1:210211 103:156924 105:78095 108.9:3157 111.1:4995 111.9:3685 115:173222 117.1:6561626 119.1:256733 …
lactic acid, 2TMS derivative	976	10.1611	1054.42	[158.8]	158.8	9284.45	14240.6	23332572	35787888			-1	-1	-1	-1	51.2:8306 52.2:6283 55.2:19801 56.4:17020 57.3:101367 59.2:615236 61.1:19729 62.3:17786 66.2:908860 68.1:9400 69.1:22205 70.2:1247 71.3:119193 73.1:10215248 75.1:1663188 77.1:1046 80.2:15472 82.1:4621 84.1:21008 85.2:66321 87.1:218092 88.2:13663 95.6:6140 96.8:5398 98:1 99.1:13303 101.1:356141 102.1:30688 108.3:3645 110.2:149 111.3:4838 113:23432 115:167515 117.1:6323626 119:280332 121.5:3618 122…
Unknown	978	10.1655	1054.59	[70.2]	70.2	90196	247654	2.0414e+06	5605125			-1	-1	-1	-1	52.2:87028 53.3:14767 54.2:5048 56.2:35999 57.2:75805 59.1:17613 61.2:25739 62.3:6065 66.2:33667 69.3:21946 70.2:90196 71.3:183002 75.1:206891 77.1:29503 79.1:49164 82.4:1687 84.2:6564 85.1:8928 87.1:108657 88.2:46221 94.3:3813 97.5:6610 99.1:28509 101.1:30319 102:46017 103.1:14731 105.1:12959 106.1:11675 106.8:3917 108.7:2372 110.1:3858 113:1660 119:62605 124.1:3012 126.8:4614 127.5:15217 130.89…
Unknown	980	10.1699	1054.75	[50.2]	50.2	8160.49	5273.6	403890	261008			-1	-1	-1	-1	50.2:8160 53.2:12776 57.2:0 62.2:1975 64.3:1209 71.2:50026 80.2:31762 81.2:6773 84.2:52420 87.2:23320 92:2053 92.9:3596 94.9:1151 96.3:2891 104.3:12301 106.4:1024 107:7129 110.2:2103 113.2:224 119.1:4275 120.3:16061 121.1:5180 121.8:333 122.8:1657 127.3:2398 135:4962 135.8:1280 137.2:1335 143.10001:4802 143.10001:1585 144.39999:11677 144.39999:3022 152.89999:389 154.39999:25 156.2:1488 156.89999:…
Tetratetraconatne	982	10.1744	1054.92	[85.2]	85.2	106218	344034	16821272	54483360			-1	-1	-1	-1	50.3:10430 51.2:19880 52.2:47375 53.2:44589 55.2:104230 57.2:27875 58.2:125343 59.2:258579 60.2:29980 61.2:89109 62.1:7827 63.1:6400 66.2:371374 68:6114 73.1:4289637 75.1:733778 77.1:53093 79.1:34730 81.2:8584 82.1:2343 84.1:54696 85.2:106218 87.3:100397 88.3:231505 91:6080 92.1:1991 93.1:11981 94.4:24636 94.9:17737 96:5848 97:2596 98.9:27011 98.9:40318 101:189261 102:102723 103.1:73503 104.8:311…
Unknown	985	10.181	1055.17	[57.2]	57.2	164353	479760	927368	2.70706e+06			-1	-1	-1	-1	54.2:11550 56.1:37012 57.2:164353 64.1:0 66.9:33312 69.2:37402 71.2:185833 76.2:64102 82.3:3712 83:13914 85.2:44 90.2:2390 92.1:8948 95.1:9415 98:9041 99.9:1 103.9:1480 105.9:8004 107.7:2427 109.9:898 111.1:2206 112.1:12804 120.2:18769 121.9:5235 126:3150 127:22525 139:1145 139.60001:1969 142.10001:4174 142.89999:11289 144.5:860 150:9342 152:3658 152.89999:1606 153.7:2118 155.60001:5172 158.3:140…
Unknown	1013	10.243	1057.48	[132.7]	132.8	23536.9	32778.2	514441	716427			-1	-1	-1	-1	53.2:2541 54.3:8048 54.3:5187 56.1:5515 57.2:11485 60.1:1386 62.2:840 66.2:105828 71.3:3193 76.1:16901 80.2:6412 83.3:2204 84:9719 85.4:11170 86:28883 87.2:21566 89.1:9659 90.1:5445 94.8:1448 96.1:3347 104:480 104.7:11132 106.1:7542 106.1:9692 106.6:4582 107.1:2730 112.1:8810 113.7:2263 119.2:5483 121.8:2408 122.6:753 123.9:957 126.1:5239 132.3:9789 132.8:23537 137.7:203 138.39999:1785 141.3:1226…
Unknown	1016	10.2496	1057.73	[146.9]	146.9	633595	1.32306e+06	2.33787e+06	4.8819e+06			-1	-1	-1	-1	52.2:37826 53.2:39050 54.1:29506 54.9:9865 56.1:10062 57.1:2995 60.5:5580 61.1:26380 63.8:2070 64.4:2748 67.1:17274 69.4:13814 70.2:98225 73.1:213727 75.1:117241 77.1:23368 79.1:20068 81:9599 82.1:3853 83.9:2147 85.1:2170 86.2:13178 87.5:24826 90.2:5798 92.2:1588 93.1:1966 94.5:12213 95:5464 96:9306 96:8709 98.4:565 100:526881 103.1:16430 104.2:4179 106.2:4291 106.8:5340 108.9:1281 115.8:18632 11…
glycolic acid	1017	10.2518	1057.81	[87.6]	87.1	3224.59	3872.27	1.26816e+06	1.52288e+06	OCC(O)=O	AEMRFAOFKBGASW-UHFFFAOYSA-N	762.842	613.953	428.571	751.562	51.2:11411 55.1:6595 55.9:465 59:15156 62.2:6290 63.1:7295 64:1094 65.1:3122 67:8111 68:11827 69.1:4096 70.1:15524 73.1:28154 77.1:6924 79.2:22994 81.1:5525 83.1:3304 83.9:4774 83.9:3079 85.1:5610 87.1:3225 87.1:25080 89:1957 90.1:4567 90.9:5960 91.7:8386 93:614 94.3:3602 96.4:3848 100:5158 102:14454 105:1418 110.3:1077 110.8:4663 112:1675 112:465 113:4050 115:10435 116.1:21293 116.9:9673 117.9:4…
Unknown	1027	10.274	1058.63	[147.8]	148	29172.4	33905.9	370288	430371			-1	-1	-1	-1	50.3:3494 51.2:20554 54.2:892 58.1:175 63:4108 64.3:812 64.9:3543 70.2:20616 79.1:0 80.2:3002 82.8:782 86.4:7367 90.9:6763 90.9:11448 97.5:1338 100:51516 101.1:8350 101.8:7168 107.6:402 108.8:2764 109.6:2557 110.2:2567 111.2:1352 113.1:1218 114.6:41 116.3:790 118.3:3 122.5:4 124.9:1218 127.5:1671 128.89999:6332 130.8:8769 132:2293 133.89999:4546 135.8:1435 136.5:337 137.2:213 141.89999:1502 142.8…
Unknown	1052	10.3293	1060.7	[71.2]	71.1	53651.7	172547	352986	1.13522e+06			-1	-1	-1	-1	55.1:1923 57.2:29229 62:3976 63.2:2759 65.2:2249 68:3200 71.1:53652 79.1:32108 80.2:7546 83.3:3552 84.1:2805 90:4346 91:1033 96.9:2113 103.9:11865 105.9:2871 105.9:2037 108:327 110:4319 112.1:2327 113.6:1377 114.3:493 117.7:6255 118.9:9380 120.4:5395 120.4:6048 122.4:113 123.1:2297 124.7:976 127.2:36 136:354 137.10001:208 139.89999:653 156.39999:3712 156.39999:1488 161.39999:2004 162:467 163.3999…
Unknown	1062	10.3515	1061.53	[85.3]	85.1	26748.2	59898.1	461973	1.03451e+06			-1	-1	-1	-1	50.3:6559 51.2:17344 53.3:7376 54.4:6762 55.1:5741 56.1:6480 57.3:12871 58.2:1 58.9:10167 61.2:1 63.3:2813 64.1:439 65:740 66.2:599 66.9:2108 67.5:1366 69:3161 69.5:15872 70.1:4096 71.2:1969 73.1:0 75.1:14191 77.1:9926 81:4862 82:4358 84.1:4276 85.1:26748 85.1:19759 86.6:2958 89.1:2803 91:4021 91.9:4305 94.9:0 95.8:160 97.1:0 97.9:1137 99.2:10590 100:0 100.9:4775 103:0 103:0 103.5:9924 105:0 107.…
Unknown	1066	10.3603	1061.86	[223.7]	223.7	18518.8	15273.1	485797	400655			-1	-1	-1	-1	52.2:10942 53.3:8271 56.2:4637 59.3:5212 60:8292 62.2:194 64.1:2655 65.5:4669 69.2:5877 70.1:9894 71.4:6310 73.1:21817 74.2:1481 76.3:38048 77.1:3876 78.1:16379 79.1:17148 81.1:1005 83.2:5057 84:2001 85.1:6968 87.9:3966 91.1:1008 94.3:865 97.1:1211 97.8:224 99:9507 103.2:2472 104:4219 105.2:2864 106.1:590 107:3403 110.9:3084 113:1062 116.3:8459 116.3:3285 117:3810 119:5195 120.8:3003 124.1:847 12…
Unknown	1070	10.3692	1062.18	[115.1]	115.1	9968.34	20677.7	632479	1.31198e+06			-1	-1	-1	-1	50.3:5915 52.2:6307 57.3:1 60.2:5324 61:17799 63:2809 65.1:5955 70.7:3390 71.3:1 73.1:40214 75.1:7467 77.1:12761 79.1:8161 81.1:1728 82.1:2889 82.1:5644 83.9:6458 85:17943 86.9:13703 88:3375 89:6495 97.2:5006 101.4:2175 103.1:19309 105.1:5259 105.9:4077 109.7:3902 112.8:10521 115.1:9968 122.3:969 123.3:2797 124.8:1524 126.8:2137 127.6:2542 128.60001:354 139.3:1526 142.39999:2141 143.2:2139 144.7:…
Unknown	1073	10.3758	1062.43	[130.8,188.8]	130.9	33565.9	66397.3	998604	1.97536e+06			-1	-1	-1	-1	50.3:3866 51.3:0 56.1:0 59.1:43513 61.2:5059 64:1005 70.2:5128 73.1:116613 75.1:55210 77.1:0 81.9:2570 83.1:4764 83.1:7867 84.1:4633 86:3129 88.7:21685 88.7:9080 91.2:2783 93.9:1839 95.2:34661 96.1:6724 96.9:4946 101.3:2374 103.1:23608 104:4504 105:16093 106.5:1621 111:1278 114.8:12433 115.9:2771 116.9:6912 121:4088 122.1:1286 124.6:1041 124.6:792 125.8:930 127.9:4432 130.89999:33566 133:23022 13…
Unknown	1074	10.378	1062.52	[220.8]	220.8	911773	1.88498e+06	3180406	6.57512e+06			-1	-1	-1	-1	51.2:0 52.3:1 55:0 57:0 59.2:46532 60.4:7001 61.1:14418 63:2898 63.9:5415 66:5606 67.2:9446 69.2:10544 71.2:0 73.1:656369 75.1:97883 79.2:14923 81.1:8084 82.1:4862 83.1:4932 85.2:5957 87.2:9757 89.1:14482 90:0 91.1:1766 91.8:2568 94.9:37981 94.9:39452 96.5:748 98:6312 101.2:3553 101.9:5219 103.1:259024 104.8:13658 106:348 108.2:2259 110:2218 113.1:0 115.1:6400 115.7:9372 116.3:6408 117:19522 118.…
Unknown	1079	10.3891	1062.93	[88.2]	88.1	3632.46	2857.08	445662	350531			-1	-1	-1	-1	51.3:15901 52.2:11406 53.3:20133 54.8:6152 54.8:6656 56.1:4093 57:1 58.1:17967 62.9:1 62.9:2783 64.3:2151 65.8:0 66.4:609 69.2:3305 71.2:1533 73.1:1693 75.1:4116 76.1:42178 77.1:1 79.1:2440 82:1111 83.9:381 85.1:5287 88.1:3632 92.2:3007 96.2:5387 98.2:13853 99:9736 101:1145 106.9:5963 108.2:3926 110:989 113.8:4208 116.1:2528 116.1:5775 118.9:11574 118.9:4035 120.2:6586 120.2:2798 122.9:640 123.4:…
Unknown	1081	10.3935	1063.09	[112.2]	112.2	20900.2	42428.2	431265	875485			-1	-1	-1	-1	50.3:3238 52.2:1149 53.2:11813 54.3:5205 55.3:1660 56:5204 58.3:9851 59.2:2784 60.9:2924 62.3:1311 63.9:715 65:1021 67.2:10799 68:437 79.1:14085 80.2:34507 82.7:5673 86:1500 87:4256 90.1:227 90.8:3821 91.5:1535 92.9:4606 94:8124 95:2607 96:2347 98:8581 99.1:9181 99.8:0 100.8:8322 101.8:5010 105:2112 106.3:2181 106.3:9697 107.9:1360 108.8:296 110:3979 111.7:13725 112.2:20900 114.9:1235 116.3:1295 …
Unknown	1098	10.4312	1064.5	[314.5]	314.5	7761.46	16480.5	301141	639437			-1	-1	-1	-1	50.3:10211 51.2:5317 52.2:10993 53.3:20682 54.1:4932 55.2:3788 63.3:1715 63.9:7574 64.9:1651 73.9:17667 76.2:9678 79.2:27263 81.3:1519 86.1:2918 90.6:2759 91.3:1 98:1 98:4085 100:1 101.7:4747 106.1:2859 107.9:2009 110:2051 110.7:1537 112:900 114.1:905 117.8:2259 118.8:2646 123.7:579 126.5:1873 127.1:299 128:3286 130.10001:4365 132.2:4161 134.2:3382 135.89999:307 137.7:234 138.3:466 141.5:3116 143…
Unknown	1119	10.4777	1066.23	[146.2]	146.2	7418.97	5238.62	220847	155942			-1	-1	-1	-1	51.2:2748 53.3:8871 57.1:3505 57.1:4883 58.2:4390 63.1:210 76.2:8797 80.3:13965 81.6:1925 84.9:3828 87.2:4977 89:984 90:1661 92.3:9871 100:1530 101.9:722 103.7:2469 104.5:4440 106:468 113.3:1248 113.9:75 119.4:10450 120:8162 121.1:2321 124.7:539 126.3:1233 127.5:1857 130.2:955 130.7:7848 130.7:5451 136:1013 137.39999:190 138.10001:1203 142.39999:628 146.2:7419 148.3:2707 153.89999:588 156.89999:2…
Unknown	1133	10.5087	1067.39	[108.9]	109.2	2334.82	5323.35	423629	965866			-1	-1	-1	-1	51.2:15935 53.2:15405 54:2197 57.2:2889 59.1:1869 60.2:4188 60.8:3714 62.1:1405 63:2990 65.1:1122 67.6:6687 69.2:2398 70:10896 76.1:11766 78.1:43923 79.1:8806 81.2:9397 82.9:2996 85.9:1 88.9:2864 90.8:10916 90.8:13383 92.8:3526 95:6708 100.1:3749 101.1:110 101.9:5429 105:229 105.7:324 106.7:7096 107.3:2953 108.6:4544 109.2:2335 110.2:2206 113.3:0 113.3:1913 114.1:3091 115:2192 118.1:5031 120.2:12…
Unknown	1138	10.5198	1067.8	[77.1]	77.1	24598.6	45259.2	413803	761358			-1	-1	-1	-1	54.2:7766 56.2:2811 57.3:4534 58.4:2004 59.2:4867 63:1357 64.1:4243 65:5817 66.1:4527 67:5816 67.8:5184 71.1:6792 73.2:2733 75.1:4484 77.1:24599 79.1:9512 80.3:4752 81.1:4619 82:1520 83.4:1414 84.1:3310 84.9:3351 85.7:1 86.4:2577 87:2321 88.9:1263 92:8059 93.1:1488 94.1:9448 95.1:7794 97.2:2243 98.1:4047 102.1:2888 102.8:5988 104.1:2152 106.7:5159 107.3:2373 108:2148 109.1:1960 109.8:4027 111.8:3…
Unknown	1141	10.5264	1068.05	[105.1]	105.1	53796.1	136103	411306	1.04059e+06			-1	-1	-1	-1	50.3:14507 52.2:9066 55.3:0 60:889 62.1:7242 62.1:5166 64.2:2022 71.9:4149 77.1:13097 79.1:4534 80.2:13709 89.1:3815 91:3184 95:2723 98.7:3916 99.7:8981 102.9:9277 105.1:53796 106.2:12182 108.7:6792 109.2:10415 110.7:75 114.9:1279 116.8:1575 120:7593 120.8:2330 122.9:3682 123.6:4771 125.1:1429 136.8:261 140.3:1362 142.8:2118 144.10001:2172 144.10001:933 145.7:2417 150.2:3581 152.60001:1985 153.89…
Unknown	1159	10.5663	1069.54	[75.1]	75.1	76386.9	133226	564089	983822			-1	-1	-1	-1	54.5:3688 56.1:4207 60:502 61.1:1931 62.3:5102 64:879 69.2:2220 71.2:1066 75.1:76387 77.1:15949 81.2:7554 82:5576 82.8:4254 86.1:3329 88.9:795 91.4:8324 93:2445 97.2:2545 98:2701 100.8:2198 102.1:4798 104:9701 105:8243 105.6:11779 105.6:11623 109:140 109.9:1929 116.9:24955 117.9:4440 120:6728 120.9:8397 122.2:963 127.2:92 129:8474 129.89999:9099 131:2736 131.89999:11069 131.89999:7319 133.8:3046 …
Unknown	1162	10.5729	1069.78	[225.1]	225.1	29633.5	64129.2	671108	1.45233e+06			-1	-1	-1	-1	50.2:12480 51.2:1431 52.2:10379 55.2:8548 55.9:2027 59:5420 61.1:1565 63:360 67.1:2299 68.3:3982 71:922 73.1:65502 75:24225 76.1:11913 77.1:12143 82.1:6068 82.1:4265 89.1:3678 92.2:488 94.1:1659 97.3:2861 98.1:338 99.2:6009 99.8:4502 99.8:9745 102:568 103:2320 105.1:10628 110.4:813 112.4:11026 113.1:3060 114.9:3171 116.1:10678 117.1:7392 121.8:2119 123:307 124.5:1645 126.4:1910 127.8:2127 130.100…
Unknown	1174	10.5995	1070.78	[177.5]	177.8	5983.21	6888.9	607544	699509			-1	-1	-1	-1	53.3:5079 54.2:6290 56.2:6621 56.2:14115 57:1954 57.5:9649 58.2:5561 60.1:7191 61.2:2370 62.2:3154 68:3355 69.2:4297 70.2:10135 70.8:11701 73.1:31006 75.1:10707 77.1:8563 79.1:28165 80.3:18146 81.2:8934 82.9:3230 83.4:3611 86.3:5661 88.1:13074 88.1:26580 89.1:8061 90.2:2898 90.9:4113 93:6715 93.9:344 94.7:8818 95.3:3684 97.1:1357 99.3:7153 99.8:8012 101.9:1277 103.1:7259 103.8:13132 105.1:196 105…
Glycolic acid; GC-EI-TOF; MS; 2 TMS; BP	1176	10.6039	1070.94	[146.9,73.1]	146.9	391988	841175	1.63723e+06	3.51337e+06	OCC(O)=O	AEMRFAOFKBGASW-UHFFFAOYSA-N	828.706	811.942	645.161	871.218	50.3:0 51.2:28726 52.3:23653 53.3:24693 57.2:4836 58.2:255 59.1:23019 60.1:9378 61.7:8096 64:153 65.1:5045 66.2:62478 67.2:4178 68.1:1563 70.4:708 73.1:406958 75.1:45833 77.1:25844 80.2:39209 84:5783 85:3593 87:4000 87.9:14352 88.8:17657 89.3:19934 90:3598 94.8:3776 96.1:2592 96.9:4402 98.5:0 100:2912 101.9:4693 103.1:25092 105.1:6720 107.1:2078 107.9:1646 110.6:6546 113.1:8335 114.9:12531 116:22…
Unknown	1178	10.6083	1071.11	[130.8]	130.8	15969.6	31380.7	595653	1.17047e+06			-1	-1	-1	-1	50.3:2622 53.3:23935 55.1:1925 55.9:2176 57:3602 59.1:22650 60.2:7108 60.9:4921 61.9:1789 63:3633 64.1:4303 67.9:3572 69.2:8208 75.1:18350 77.2:1 79.1:15899 82:4579 86.9:2233 90.2:1451 90.9:3729 93:5659 94.9:1454 96.9:3919 97.9:2269 97.9:3452 100.9:5133 103.1:18226 108.8:482 110:4535 111.1:2360 113.7:3833 115.1:11724 118.3:1 119.2:6720 123.1:2901 123.8:210 128.60001:0 130.2:2577 130.8:15970 132.8…
Unknown	1179	10.6105	1071.19	[208.1]	208.1	2409.15	3784.99	428315	672920			-1	-1	-1	-1	50.3:2223 51.2:11203 53.2:25565 58:9283 60.4:1304 61.2:444 62.6:2144 64.9:4225 66.1:15924 69.2:3976 70.2:7744 73.1:16323 75.1:18497 77.1:1 81.2:2092 81.9:6634 82.8:340 84:908 85:2057 86:4131 89.2:1387 91.1:2817 93:3630 95:3515 96.3:3093 97.1:583 99:1805 100.9:6543 106.2:1826 106.9:4788 109:2832 110.1:5132 111.9:2034 113.9:2642 114.8:6987 116:0 117.1:1 118.3:1 119.9:2156 124.3:345 124.3:1373 124.7…
Unknown	1181	10.615	1071.35	[150.7]	150.9	5961.11	12163.1	685864	1.39944e+06			-1	-1	-1	-1	50.2:7486 51.3:16889 52.2:31507 55.1:5158 59.2:4713 60.2:3845 62.1:1 66.2:27112 67.3:2102 73.1:61451 75.1:0 81.9:2023 83.3:3783 84.2:906 85:5622 85:3000 86:2510 86.7:3924 92.1:3050 94.3:0 97:1702 97.9:4623 98.9:3834 99.9:3600 101.3:8890 101.3:1426 101.3:7950 103.8:647 105:1 106.9:14808 108.1:719 108.9:1441 109.6:1987 112.9:2994 113.9:3634 114.8:985 115.3:10096 119:5536 122.8:1414 124.4:1368 125.8…
Unknown	1183	10.6194	1071.52	[203.7]	204.1	25913.6	44934.7	366167	634942			-1	-1	-1	-1	51.3:16847 52.3:27867 54.1:3206 55.1:1611 63.2:4784 64.7:11890 65.3:4450 71.3:3225 71.3:8012 81.2:1607 92.9:1 96:2281 96.6:4514 97.4:1423 104.6:7146 105.8:9476 107.2:4918 109.7:1422 111.1:5186 116:2572 116.8:4499 118.4:2487 123:1133 124.8:1744 126:5094 127.6:2474 131.89999:6730 136.8:7113 139.2:2296 139.89999:1140 141:2535 141.8:3173 144:4375 150.89999:1776 155:1863 155.5:1313 158.2:596 158.2:138…
Unknown	1203	10.6637	1073.17	[86.2]	86.2	26077.8	59614	379866	868376			-1	-1	-1	-1	50.3:239 51.3:1 52.2:16570 54.1:1022 55:1533 55.9:7950 57.1:6081 58:6054 58.6:9955 61.9:1077 65:2793 65.6:2051 66.3:2364 67.2:579 68:2238 69.3:3037 70.2:3309 71.1:2162 75.1:1 76.2:23415 79.1:6293 80.2:34206 83.9:1879 85.3:7081 86.2:26078 87.1:358 92:3444 93:362 96.2:7618 96.2:5855 98.5:4834 98.5:1505 99:3614 101.2:1398 102:1048 103.5:190 106.2:0 107:3186 108.9:1671 109.6:2108 110.8:3502 112.3:32 …
Unknown	1237	10.739	1075.98	[123.2]	123.2	20109.6	45077.8	391479	877543			-1	-1	-1	-1	50.3:1611 51.3:2546 52.3:4628 56.4:6226 56.4:4896 57.2:18461 59.1:1476 59.9:1943 65.8:1393 66.4:4673 67.1:4323 68.1:4793 76.2:16771 77.1:5427 80.9:14564 81.6:5964 84.3:81 84.3:5804 85:1205 86.1:3433 89.1:785 95.7:8735 96.7:2469 99.3:1274 100.8:776 102.4:2654 103.2:742 104.1:3160 105.8:1539 106.8:3284 106.8:1221 108.1:19103 108.9:1982 110.8:1682 110.8:1888 111.3:2773 115.8:3153 117.6:11257 117.6:6…
Unknown	1244	10.7545	1076.56	[69.2]	69.2	24432.4	50587.1	517612	1.07171e+06			-1	-1	-1	-1	52.2:1823 53.2:15458 54.1:142 55.2:11212 56:5011 57.1:12776 59.1:2408 61.1:5129 63.2:3178 64:3203 65.2:612 69.2:24432 70.1:25750 71.1:13391 73.1:17152 74.1:8135 75.1:12601 80.3:14620 82.1:8620 82.1:7588 83.3:15595 84:7484 84:13639 92.9:7645 92.9:5462 94:4804 95:2803 96.7:1276 100.1:3315 101.1:1865 101.7:2747 103.1:955 104.7:2127 108.5:13292 109.4:5947 110.1:1625 111.1:6365 112.9:3016 114.3:434 11…
Unknown	1251	10.77	1077.13	[70.9]	71.2	4786.67	3443.2	232286	167090			-1	-1	-1	-1	50.3:309 51.2:7387 52.2:4258 55.3:4275 55.9:1203 57.2:1522 57.2:886 58.3:2062 60:1360 60:2381 62.9:3112 69.1:536 71.2:4787 73.1:507 77:3081 80.1:7274 81.1:5129 83.1:4328 85.2:2664 86:2225 87.3:2471 88:1567 89:158 89.9:855 90.9:5840 96.3:1326 97.3:637 98.4:498 100.4:1188 100.4:2255 102.1:2982 103:1607 104.1:2474 104.9:2268 107.3:3924 107.9:160 111.1:1332 112.2:2861 115.8:2772 116.8:4079 117.6:1059…
Unknown	1289	10.8541	1080.27	[128.9]	128.9	28951.9	64627.4	395852	883633			-1	-1	-1	-1	52.2:13118 54.2:4821 58.5:5043 59.1:6781 60.1:288 62.1:1971 65.5:113 68.2:6739 81.1:12395 81.8:8893 84.7:9421 86.1:2499 89.1:2422 90:3703 91.1:1271 92.6:432 95:2116 96.1:3381 98.9:7962 99.5:7023 101.1:3226 101.1:2908 102.2:4514 102.8:2811 103.9:2992 105:2760 106.3:879 108.2:83 110.6:4515 113.8:4005 117:16217 118.2:1195 119.7:3904 120.2:7960 121:1500 122.8:1184 123.7:1164 124.2:3543 125.1:1267 125…
Unknown	1293	10.863	1080.6	[73.1]	73.1	201958	426976	801442	1.69439e+06			-1	-1	-1	-1	51.2:1284 55.1:12533 56.2:9077 57.2:10633 58.2:1981 59.3:11010 61.2:4935 63.2:2807 64.1:3079 65.1:25 66.2:171 67.1:3497 69.2:12584 71.6:11039 73.1:201958 75.2:48972 76:12065 77.1:5339 79.1:16312 80.2:20315 82.9:17866 83.7:6473 84.2:7431 85.1:1154 87.3:1677 89.9:1051 91.1:2240 93.1:1196 93.9:6885 94.5:4415 96.2:1919 97.9:6298 100:1973 101:678 102:7894 103.6:9016 107.8:1 108.9:2106 110.8:4004 111.5…
Unknown	1295	10.8674	1080.77	[89]	89	36008.3	69294.2	569475	1.0959e+06			-1	-1	-1	-1	50.2:3423 52.2:8274 54.4:6684 55.1:5745 57.1:96 59:6777 59.9:2992 60.5:5196 65.1:3543 68.1:10798 70.1:18521 71.4:13473 73.1:656 75.1:3168 76.3:15998 77.1:1587 78:54440 82.2:6893 82.8:18353 86.1:340 86.7:5172 87.9:2968 89:36008 91.2:4538 95:3572 96:1790 98.9:791 101.1:5990 101.9:6840 103:3369 105.1:1262 105.9:1232 107.3:193 108:1 108.6:0 110.9:4115 115.1:11008 117:62264 118.2:6272 118.9:3231 119.9…
Unknown	1325	10.9338	1083.25	[312.6]	312.8	4378.15	5247.03	279890	335436			-1	-1	-1	-1	50.3:3461 51.3:2716 52.2:1354 54:3497 57.5:0 59.3:12103 60.1:1656 62:4134 66.1:1093 73.1:0 76.1:24536 77.1:616 80.2:7397 86.3:383 89:7147 91.1:1 91.7:6234 91.7:6509 95.9:3506 97.8:503 99.8:727 101.9:1 103:2819 103.9:1193 105.5:2798 106.9:345 109.3:1472 110:1643 110.9:264 112:230 113.2:3645 114.9:324 115.6:533 118:176 121.9:3051 121.9:3568 125.8:1 127.4:423 129.10001:1298 131.10001:1725 132.60001:…
Unknown	1327	10.9383	1083.41	[192.6]	193	12790.8	20116.6	374358	588767			-1	-1	-1	-1	54.1:1533 54.9:1 56:1 59.1:10537 59.8:4667 61:593 61.9:4408 63.8:4912 67.3:2491 71.7:10557 75.1:7446 76:3320 77.1:3857 80.2:23202 81.1:4721 82.6:5532 83.9:2244 83.9:1198 86.1:1086 89.9:3570 90.9:184 93.2:1143 94.3:2138 97.4:1688 98.2:2675 98.8:2430 99.6:6089 99.6:3278 104.9:910 105.9:3747 109:3443 113.8:2994 117.9:1315 119.7:4808 120.2:8894 121:3034 123:601 123.7:1420 125:597 127.2:228 128.7:779 …
Unknown	1329	10.9427	1083.58	[310.7]	310.9	38575.8	79245.7	526255	1.08108e+06			-1	-1	-1	-1	51.3:7056 52.2:4715 53.2:1033 54.9:0 58.8:8749 62.8:1453 63.3:2363 64.3:1706 66:2210 69.2:1639 73.1:21083 77.1:14163 78.1:69961 79.1:2118 80.2:1286 81.2:2150 85:592 87.4:1610 89.1:12642 91.1:600 92:0 93:5742 94.4:2358 95:3266 97:688 101.1:4191 101.9:4085 103:7857 103.9:3048 105.4:3503 107:3795 107.9:2422 108.5:1598 110.8:685 112.9:207 114.1:2416 117:984 117:10671 119:3228 119.9:5675 121.1:1513 12…
Unknown	1340	10.9671	1084.48	[72.2]	72.2	96778.2	165089	426836	728118			-1	-1	-1	-1	51.3:14128 52.2:642 54.2:1159 55.1:9082 56.2:701 57.1:4168 58.1:4410 59:1281 60.2:1240 61.1:2826 63.1:222 64.6:5656 66:1529 70.1:10360 72.2:96778 73.1:17841 75.1:14893 76.1:14273 77.1:1 79.1:9204 81:170 81.6:1275 83:2572 84.9:2201 85.4:1533 86.2:1798 86.8:663 89:117 91.1:2136 91.8:2179 92.9:304 96:150 97.4:1270 98.1:1324 98.7:2558 101.5:747 103.2:3088 106.1:3127 106.1:913 106.8:554 109.6:923 110.…
Unknown	1349	10.987	1085.23	[237.4]	237.6	4633.69	4892.91	315703	333364			-1	-1	-1	-1	50.3:3856 51.3:5579 53.2:3927 54.2:1600 55.1:6053 56:1563 57.9:3220 59:2543 59.9:1569 61.2:2769 64.2:7981 64.8:12551 64.8:2696 67.3:1274 69.2:6574 70.1:571 73:7219 75:1971 79.1:5553 82.8:3627 87:2630 90.1:1787 91.9:651 93.8:5170 95.9:1 99.9:5678 101.1:97 103.1:3909 105.6:5247 106.2:1269 106.9:2781 111.1:592 113.1:4065 116:2672 120.1:2405 121:4907 122.2:1400 123.7:2295 126.3:1451 128.7:1440 128.7:…
Unknown	1351	10.9914	1085.39	[169]	169	7034.13	14288	482969	981025			-1	-1	-1	-1	51.3:15888 52.2:9549 55.3:6954 56.1:3702 57:3065 58:1333 61.8:2353 63.9:5663 65.2:363 65.9:366 67:1898 68.3:9634 72.1:34093 75.1:13652 76.1:32680 77.1:10775 79.2:25349 82.5:2850 84.2:938 85.2:4261 86.1:1129 86.9:1189 92:919 92.8:4612 94.7:2562 99.1:6604 99.9:9746 101:12924 101.7:3422 104.3:460 105.6:6856 111.1:2631 113:6183 114:1811 114.9:1314 115.9:2800 115.9:16420 117:1497 117.9:2903 120.1:616 …
Unknown	1354	10.9981	1085.64	[72.2]	72.2	21195.8	14676.4	290269	200989			-1	-1	-1	-1	50.3:5531 51.3:3149 52.3:748 53.3:11921 56.3:1437 57.3:902 58.2:1 60:4316 63:3664 66:2541 68.3:2326 68.3:6227 69.3:2196 71.1:564 72.2:21196 79.1:6109 82.1:6 84.1:812 87.6:2904 90:557 91:2850 95.1:5501 96.1:645 97:2892 100.7:7316 103.9:4419 106.9:2445 108.5:1292 110:2286 111:3369 111.9:4452 115.2:1141 115.9:8932 117.2:1436 118.1:3423 118.9:443 120.1:4753 121:3038 123.9:460 125.7:582 127.4:1220 128…
Unknown	1368	11.029	1086.8	[211.7]	211.7	6801.04	13051.6	252376	484326			-1	-1	-1	-1	50.3:7925 51.2:4269 53.3:4403 64.9:972 66:2352 67.3:2934 68.1:6207 70.1:10368 77.2:6620 80.2:20010 82.1:1237 82.7:128 89.9:1220 91.1:5511 92:4586 94.3:4494 95:3877 97.2:1544 98:1861 99.3:2637 100.1:1414 103.8:4490 105:557 105.7:409 107.1:72 107.8:2842 112.9:1613 113.8:1428 116.2:493 117.9:348 118.7:4402 119.3:1096 120.1:2440 124.4:625 126.9:2291 129.10001:5160 135.10001:2267 135.8:61 137.89999:56…
Unknown	1376	11.0468	1087.46	[154]	154	34183.5	78368.4	312354	716097			-1	-1	-1	-1	50.3:3478 51.2:4984 54.4:6753 57.3:2503 60.3:297 61.9:2668 63:1578 64.1:1220 68.1:4418 75.2:20346 80.8:4239 83.1:2631 83.9:5610 84.5:825 85.6:4459 89.2:10426 90.2:770 94.1:1116 96.1:1576 97.1:5271 98.1:1993 103.9:1842 104.4:3937 109.9:1966 113:2631 113.7:4906 114.8:2753 121.5:1477 124.5:630 126.5:3402 129.7:2736 134.2:740 134.89999:621 135.60001:1335 138.89999:424 139.7:1161 139.7:787 140.8:779 1…
Unknown	1388	11.0733	1088.45	[163.1]	162.8	17842.9	38224.2	307523	658796			-1	-1	-1	-1	50.3:314 53.3:1454 55.3:1855 57:1218 59.1:591 60.3:241 63.3:4660 64.8:2665 65.3:3723 66.5:5844 66.5:780 70.1:5917 80.3:18675 82:1489 82:1081 91.1:3002 92:3722 94.2:2802 95.1:3753 98.4:423 101.8:146 105:922 107:3924 108.9:4041 110:910 110.8:504 113:1140 113.7:3224 114.7:1102 116:2218 118:1537 118.5:3530 119.1:1637 122.3:393 123:736 125.3:1225 125.8:1616 128.8:1119 129.7:847 129.7:1791 132:1659 132…
Unknown	1401	11.1021	1089.52	[175.3]	175.5	2726.9	4040.69	334962	496344			-1	-1	-1	-1	51.2:5598 52.2:754 53.3:12883 54.2:2678 58:2266 61.9:3784 64.4:3813 65.7:10896 66.4:329 67.3:1123 68:5835 69.2:5319 73.1:900 75.1:17862 77.1:5012 79.2:3168 81.1:5255 86.1:2300 87.9:3569 90.9:2947 94.3:5988 100.1:40 102:537 104:3559 106:767 107.7:2125 109.5:2927 114.5:6630 115.2:851 116.8:4572 116.8:7166 117.8:5648 118.8:4197 119.3:5319 120.1:5241 122.1:714 123.3:1162 125:305 125.9:5345 128:4087 1…
Isobutylamine; GC-EI-TOF; MS; n TMS; RT	1405	11.111	1089.85	[173.9]	173.9	251763	617463	1.13735e+06	2789405	NCC(C)C	KDSNLYIMUZNERS-UHFFFAOYSA-N	748.78	768.163	625	840.661	52.2:11318 53.3:21395 57.1:5675 59.1:66601 63.2:4151 63.2:6973 64.9:4242 68:13513 73.1:1243 74.2:17872 79.1:27664 80.2:15436 82.1:4368 82.8:3943 84.1:4597 84.9:2425 86.1:95613 87:8783 89.1:938 93:14464 94.1:6456 94.8:56 99.1:4188 100.1:32910 101.1:9783 102.2:14335 103.1:33346 110.2:6942 112.3:1988 113:7267 114.3:4675 116:11161 120.9:7270 125:1744 126:2165 127.9:63774 129.89999:17042 129.89999:440…
Unknown	1407	11.1154	1090.02	[73.1]	73.1	342697	926044	1453429	3.92749e+06			-1	-1	-1	-1	50.2:8179 51.2:4815 52.2:12900 53.3:23394 56.2:5521 58.3:7806 59.1:65939 60.1:7838 61.1:5903 63.1:2510 63.9:2355 64.4:2250 65.3:7177 66:1856 66:13899 67:7910 68:7643 69.2:29117 73.1:342697 75:59531 77.1:11157 79.2:24956 81.1:9958 82.2:5036 84:5156 87.1:6610 87.8:8700 90.9:3337 99.1:12958 100.1:48557 101:12694 101.8:16556 103.2:34491 104.1:435 105.2:6310 106:3690 110:6311 111:9833 112.1:1970 113.2…
Unknown	1408	11.1176	1090.1	[175.5]	175.9	11715.1	24531.1	459640	962471			-1	-1	-1	-1	50.2:10325 52.2:13335 53.2:24191 56.1:3487 57:2624 60.2:1775 61.1:352 63.1:1045 66.1:1 67.3:6202 69.1:2036 70.9:5654 73.1:48 76.3:21306 82.2:2573 84.1:498 85:784 88.2:3686 91.2:512 92.1:2198 93:2792 96.4:1666 99:7494 101.1:6531 103:4497 104.8:6666 107.1:3888 108.7:628 109.9:1 110.5:2214 111:8688 112.7:3395 113.3:8931 115:3653 115.8:17232 115.8:18080 116.9:519 118.1:2655 120.8:2515 121.8:484 122.5…
Unknown	1411	11.1243	1090.35	[206.8]	206.8	110809	232326	709710	1.488e+06			-1	-1	-1	-1	50.2:9195 52.2:3964 54.3:1959 55.1:3745 56.2:3466 57.3:1 58.1:897 59.1:2438 60.2:5252 60.9:3460 60.9:4840 64:1657 65:1563 65:11094 66.1:0 66.1:4313 66.6:7416 69.2:25890 70.3:1841 75.1:23156 76.1:848 77.2:0 79.1:0 81:5716 81.8:3160 82.8:1913 83.9:3358 87:2017 88.2:138 89:1738 91.4:2203 96.2:4582 99:1725 100.8:9126 103.1:24199 104.9:7028 104.9:8293 105.9:6023 106.9:3248 106.9:2820 107.3:3596 109.1:…
Unknown	1412	11.1265	1090.43	[228.4]	228.8	1074.78	1570.79	456075	666549			-1	-1	-1	-1	54.4:1484 55.9:2188 55.9:47 58.2:7114 61.2:2917 63.2:441 66.2:11378 67.1:7480 69.1:1370 71.5:3416 75.1:816 76.1:8498 78.1:100730 83.3:0 88.2:1575 95.6:3082 96.4:4031 97:3521 103.8:1040 105:1024 106.1:3013 106.8:5788 108:2565 114.4:880 115:1434 116.9:1 117.8:4070 118.4:7704 119:4912 120:9473 122:1482 123.3:320 124.8:908 130.7:10093 132.89999:1304 134:2447 134.7:1835 135.5:2566 136.60001:5054 138.3…
Unknown	1419	11.142	1091.01	[244.8]	245.1	11045.7	8029.12	484087	351883			-1	-1	-1	-1	50.2:5121 51.2:12511 52.2:97 53.3:17743 55.1:3021 56.1:991 57.1:0 59.1:0 60.1:380 64.5:5007 64.5:3523 68.2:4872 69.2:4296 70.7:3261 73.2:55174 75.1:5000 76.1:29267 77.1:7644 79.1:13642 80.2:12795 81:5253 82:913 84:3405 85.2:2053 86.1:0 86.9:3227 88.4:0 91.2:505 93:3206 94.6:6653 94.6:2619 96.1:689 100:0 101:7632 101:11042 102:7104 103:6216 106:401 108.6:2892 109.8:226 111.3:2740 113:380 113.8:1 1…
Unknown	1421	11.1464	1091.17	[150.9]	150.9	84717.2	211732	678573	1695944			-1	-1	-1	-1	50.3:3363 51.2:5781 52.2:3369 53.3:5667 54.4:1015 55:0 55:5393 60.3:2561 61.3:2326 63.1:6803 64.2:246 66.3:10698 66.9:6019 69.2:9252 75.1:9045 77.1:49574 79.2:7474 80.2:23165 81:12243 82.9:479 85.1:2105 89:4398 90.6:2090 91.3:4658 92:1786 94.6:744 97.1:695 97.7:1887 98.4:7467 103.2:591 103.8:9735 104.5:4235 105.7:3807 107:1 120:16644 121:11437 122.2:2705 124.1:3330 127.1:6146 132.3:1288 133.2:581…
Unknown	1450	11.2106	1093.57	[71.1]	71.1	20755.3	57445.7	208693	577612			-1	-1	-1	-1	52.3:3303 53.2:2285 55.1:1476 57.4:3985 61:3531 61:242 62:554 66.4:1706 67.8:514 70.1:3867 71.1:20755 71.9:12228 74:717 76.2:8067 77.1:226 78:31 80.2:3411 81.7:114 82.8:1423 84:3935 85.2:7458 89:1761 91.1:2340 91.1:6069 97:1084 98:424 107:399 107.7:601 111.7:1043 112.3:1466 121.1:177 123.4:20 126:359 126.9:5426 130.89999:5086 130.89999:6483 133.8:2313 133.8:3152 135:791 140.2:51 140.8:93 142.8:13…
Unknown	1488	11.2948	1096.71	[187.8]	187.9	22152.5	51545.1	1390633	3.23577e+06			-1	-1	-1	-1	51.2:19375 53.1:24929 54.2:2501 56:14157 59.2:39764 61.2:4551 62.3:2710 66.1:44729 67.9:7451 70:13600 73.1:136377 75.1:20151 76.1:2005 82.8:2116 86.1:11418 87:9323 88.3:17001 90.1:1573 91.5:514 92.1:7611 94.9:12486 96.9:3772 99.1:1 99.8:12450 101.9:8242 101.9:15655 104.1:6763 104.9:8726 106.1:8870 106.8:1501 109.8:4360 110.6:2281 113.2:8973 114.7:6038 116:0 117.1:13805 122.1:678 127.3:422 129:344…
Unknown	1490	11.2992	1096.88	[144.1]	144.2	9512.08	18607.7	573589	1.12206e+06			-1	-1	-1	-1	50.3:2312 52.3:929 54.1:4752 55.2:6267 59.2:6225 60.1:1671 61:3873 63.1:7044 63.8:2969 66.2:5873 67.2:8530 70.2:12704 73.1:60013 75.1:32033 76.2:46936 79.1:5100 86.1:1067 88.1:2166 90.4:5805 91.2:3213 96.3:4201 97:450 100:22023 101.9:3166 102.9:13822 103.9:4900 104.6:1183 105.2:559 106:185 108.1:1332 111.5:0 112.9:9680 116.3:15545 119:2026 120.1:1 121.1:2220 122.2:249 123:783 124.6:821 125.3:470 …
Unknown	1492	11.3036	1097.04	[218.8]	218.8	5598.42	8320.77	2.54702e+06	3785557			-1	-1	-1	-1	51.3:19251 52.2:31281 55.2:6438 55.7:10313 56.3:10698 57.1:13817 59.2:79897 60:12363 61.2:720 63.1:4837 64.9:6259 66.2:16304 67.1:8163 68.1:7831 69.3:3692 70.1:11391 70.9:4962 73.1:371887 75.1:94954 77.1:12331 79.1:27901 81.1:1 82.3:1426 83:2617 84:3342 85.1:1 86.2:1294 90.7:5697 93.1:5872 94.5:9972 94.5:31527 96.7:3770 97.9:1525 100.8:613 101.5:3922 105:6910 106:3926 107.4:571 109.1:452 109.9:0 …
Unknown	1493	11.3058	1097.12	[146.9]	146.9	1.29423e+06	2.68163e+06	3.14112e+06	6508378			-1	-1	-1	-1	50.2:801 51.3:11211 52.3:23952 53.3:2163 54.1:10866 55.1:2897 56.1:16088 57.2:16818 58.4:4092 59.3:79086 60.1:9711 60.9:15760 60.9:2137 62.2:1916 63:1588 65.1:500 66.2:114414 67.2:5441 68.3:4373 69.1:2432 71.1:5056 73.1:368729 75.1:46180 76.1:8849 77.1:9228 79.1:32454 82.1:1524 83:2799 84.2:4168 86.2:40063 87.1:11202 87.8:29086 88.7:9904 89.3:3421 93:5330 94.9:34719 98.1:1793 99.1:3571 100.1:9706…
Unknown	1495	11.3103	1097.29	[57.2]	57.2	19058.6	21076.7	465667	514976			-1	-1	-1	-1	51.3:3395 53.3:1995 55.2:2677 56.5:25236 56.5:23262 57.2:19059 62.3:4632 65.3:6600 70.1:5679 78.2:30427 79.1:36383 81.1:1755 82.3:2112 83:2013 84:3009 84.9:3125 86:4992 86:6911 88:33716 90.2:5160 91:1 92.9:204 94.5:12177 97.1:0 98.1:1987 98.8:3883 106.8:4505 111.2:1936 113.9:1481 119.1:5328 122.1:792 123.8:1037 125.4:4566 127.2:1214 129.10001:938 130.8:3381 132.89999:49402 134.7:6564 134.7:2347 1…
Unknown	1499	11.3191	1097.62	[116]	116	51531.1	117849	447080	1.02245e+06			-1	-1	-1	-1	50.3:21742 54.2:9998 62:4272 63.9:305 73.1:25352 75.1:15750 87.3:5841 88.1:7618 88.9:473 91:2919 95.8:2330 99.9:15622 99.9:15534 101.9:1422 102.7:1779 103.2:8438 104:4191 104.9:13048 106.7:4515 106.7:2596 107.9:286 114.7:587 115.5:20381 116:51531 119.9:8163 119.9:6097 122.9:791 130.89999:12676 132:6483 132.89999:8541 135.39999:436 143.39999:2176 149:7898 152.7:1602 155.60001:597 159.89999:11290 1…
Unknown	1506	11.3346	1098.2	[150.8]	150.8	22519.4	37317.6	309062	512156			-1	-1	-1	-1	56.2:21393 64.5:3788 65.1:2885 85.7:0 89.9:774 94:12356 97.2:2390 108.9:2412 109.9:275 111:2455 113.9:1676 116.9:3077 118:3841 122.2:2116 123.8:1146 124.4:1392 125.7:6051 128.2:649 129:3242 129:1888 137.8:1520 148.5:12967 150.8:22519 150.8:24989 152:10333 157.8:1 163.89999:924 166.3:987 167.2:1010 168.2:59 176.39999:619 177.7:1422 180.7:0 181.60001:831 183.7:1596 185.5:3370 190.8:781 192.7:174 19…
Unknown	1509	11.3413	1098.44	[273.6]	273.6	6753.07	8951.2	281196	372725			-1	-1	-1	-1	52.2:1 54.2:3309 59.2:0 61.2:1324 63.8:4114 66:0 66:1 73:0 75.2:0 76.3:15696 90:759 91.9:3340 94.2:6723 96.7:7911 100.1:10383 101:1583 103.7:777 107.7:581 110.6:0 110.6:3643 115:2844 122.2:101 125:2309 131:0 132.8:1 135.8:962 136.7:596 139.89999:639 143:2751 144.2:1 146.89999:0 148.10001:17113 148.8:0 151:2235 152.8:9516 155:3419 160.3:3219 160.3:4977 168.3:80 170.10001:0 172.39999:9794 173.5:203…
Unknown	1516	11.3568	1099.02	[260.7]	260.9	3542.44	6258.9	478008	844562			-1	-1	-1	-1	60.5:3645 60.5:2671 61.9:2630 64:7314 66:0 72.9:27710 76.2:17662 78:36050 80.2:10578 90.1:2936 91.9:10932 94.1:501 97.2:13446 103.8:3611 106.7:1557 107.3:4197 109.6:2070 110.5:5155 111:16616 115.1:1336 116.8:2105 119.9:984 124.8:8 130.39999:2893 134.2:2438 136.89999:2075 138.60001:1367 139.2:2333 144.5:2147 145:3872 151.7:7219 151.7:12499 158.2:4691 159.3:9631 159.3:6876 160.7:3865 167.10001:943 …
undecane	1518	11.3612	1099.19	[243.9]	243.9	116636	299111	7.26746e+06	18637194			-1	-1	-1	-1	50.3:0 51.2:25623 52.2:1 53.2:0 55.2:409386 57.2:2546902 58.2:148766 60:4204 61.7:5323 62.4:549 63.1:5360 65.3:0 67.2:1 69.2:215435 71.2:1215232 72.3:138822 77.1:23463 79.2:1 80.3:37421 81.2:21293 82.1:21407 83.2:103953 84.2:219852 85.2:612737 89.1:2884 89.1:1051 91.2:1 91.9:11864 93:16178 94.9:12266 95.6:14290 98.2:177239 99.2:170223 104.8:0 106:2683 107.1:2851 107.9:285 109.2:4706 112.2:91002 1…
Unknown	1519	11.3634	1099.27	[72.3]	72.3	117925	86950	666203	491213			-1	-1	-1	-1	50.3:0 51.2:0 52.2:0 53.2:1 55.2:0 57.2:0 58.3:1 59.3:1 60.2:1390 60.9:910 60.9:1760 62:834 64.2:3411 65.2:1 67.1:1 69.3:1 70.2:109250 71.2:1 72.3:117925 75.1:9378 77.1:1 78.1:41047 79.1:0 81.1:0 83.2:0 84.3:1 85.2:0 87.2:1 88.9:1259 89.9:1 91.2:1 91.9:10801 93:5159 95.2:1 96:0 98.2:1 99.3:0 101.3:3466 102.9:0 102.9:10770 104.1:1 105.1:0 106.1:4435 108.4:4714 109:0 110.1:0 112.2:1 113.2:1 115.4:7…
Unknown	1522	11.3701	1099.52	[258.7]	258.7	4741.3	6315.5	531002	707303			-1	-1	-1	-1	51.2:9197 53.3:2243 59.2:4946 60.1:2191 63.1:4183 67.2:370 73.1:17564 75.1:4539 79.1:3914 87.3:4188 93:3686 95:7135 100.4:34708 101.7:4896 102.8:0 103.4:2865 104.4:6363 105:11991 107.9:2092 115:1 117:3932 118.2:13651 118.9:2522 120:13419 122.8:1879 128.3:199 129:3413 131:489 131.89999:7064 132.89999:5565 135.2:8618 136.8:1349 137.60001:4198 138.10001:6842 140.5:4963 141.7:5018 144.2:356 146.7:218…
Unknown	1524	11.3745	1099.68	[86.3]	86.3	44578.7	37163	1.08584e+06	905207			-1	-1	-1	-1	57.2:1422 58.3:94123 71.2:116126 77.1:301 83.2:10987 84.3:278636 85.2:26459 86.3:44579 87.8:4411 93:5694 94:12123 98.2:14165 100.3:23669 102.9:10831 105.8:5149 108.8:9067 109.4:3052 110:10889 110.5:4432 112.2:30445 114.2:48829 116:4575 116.9:4246 121:5833 122:1815 123:394 124:4100 127.2:27082 128.39999:7637 129.10001:9000 134:5471 134.60001:3107 137.10001:2977 138.7:3609 141:259 145:2890 151:1 15…
Undecane	1530	11.3878	1100.18	[81.1]	81.1	119877	315634	50723824	133554480			-1	-1	-1	-1	50.3:48811 51.3:25153 52.3:68020 53.2:103560 55.2:308024 57.2:17697060 58.3:726777 59.3:19619 60.5:4788 61.2:5417 61.8:12560 63.2:21411 64.1:35231 65.3:34081 67.2:148296 69.2:1743460 70.3:3315222 71.2:10667177 72.3:320849 73.1:59543 75.1:20164 77.1:40380 79.1:200693 81.1:119877 82.3:129936 83.1:111051 84.2:2299880 85.2:5530204 87.2:8616 89:41879 91:58523 92.3:6133 93:22842 95:11618 98.2:1637658 9…
undecane	1531	11.39	1100.27	[57.2]	57.2	17853554	42672640	54077156	129252416	CCCCCCCCCCC	RSJKGSCJYJTIGS-UHFFFAOYSA-N	933.427	541.394	615.385	824.284	50.2:28769 51.3:22229 52.3:76487 53.2:369880 55.2:2723958 57.2:17853554 58.3:725739 63:21639 65.2:39648 67.2:216477 69.2:1772866 70.3:3336985 71.2:10731225 77.2:34024 79.2:215188 81.2:123320 82.3:232507 83.2:743675 84.3:2322780 85.3:5571104 89.2:45464 98.2:1656687 99.3:1220675 104.8:21012 104.8:24164 104.8:20170 105.9:11824 106.7:4704 106.7:13027 107.8:5640 108.9:16332 112.2:733078 113.2:876302 1…
Unknown	1535	11.3989	1100.61	[133.1]	133.1	58448.6	109660	1.47366e+06	2.76485e+06			-1	-1	-1	-1	51.3:7447 57.2:3429 59.2:0 60.1:4118 60.1:6657 61.1:4411 62:1261 63.1:4613 65.3:2952 70.3:358874 71.2:29698 75.2:48953 80.3:23578 81:14884 86.3:136032 89.2:11452 94.4:11646 95.2:4512 96.3:7056 98.2:34794 101.3:3190 102:5077 103:4073 103.9:9234 109.4:1941 110:3016 113.2:46013 116:8260 117:17541 119.1:9350 122.1:2807 125.1:6286 126.2:16917 130.89999:11441 131.7:13474 132.60001:18856 133.10001:58449…
Unknown	1538	11.4055	1100.86	[157.5]	157.5	11534.8	7307.69	896755	568124			-1	-1	-1	-1	53.2:3753 55.2:6324 57.2:70 63.1:1987 64.2:496 65.2:251 69.2:13137 70.3:452267 71.2:38585 72.3:27354 73.1:0 74:3828 79.1:139 81.2:3330 82.2:29842 83.2:2804 84.3:101733 85.3:40858 89.2:304 90.2:1135 93.9:988 96.3:14489 98.2:2978 99.3:1075 101.7:1370 104:4539 107:1190 115.9:1557 116.8:2308 116.8:7257 118.7:971 120.3:2623 122.2:1000 123.9:94 125:611 130.10001:1686 133:432 136.10001:510 138.2:88 138.…
Unknown	1541	11.4122	1101.12	[103.2]	103.2	10995.2	16585.6	346587	522804			-1	-1	-1	-1	61.1:3001 63.9:5189 73.1:48663 75.1:33894 90.1:3878 92.1:6244 94.1:12368 96:1936 97:20713 101.3:3907 103.2:10995 103.2:10812 108.2:5004 121.8:412 123.7:3361 130.89999:2708 136.2:193 137.10001:0 137.7:241 142.10001:559 143.7:1585 144.8:699 146.8:1 147.8:11237 149.8:2223 151.8:1 153.10001:1395 160.3:0 166.10001:1 168.3:530 172.10001:3256 173.89999:1 175.2:2468 176.2:1834 178:1173 180.39999:0 180.89…
Unknown	1542	11.4144	1101.2	[187.4]	187.1	3233.38	3024.21	379040	354519			-1	-1	-1	-1	52.2:4831 59.2:13356 61.3:3409 63.7:15535 66.4:25393 72.4:1 73.1:78843 76.1:16206 87.2:2476 88:3644 89.9:3433 103.1:19763 105.8:0 106.8:0 108.5:1836 108.5:4030 115.3:6829 120.3:3138 121:7726 123.8:1224 129.8:8423 137:305 138.89999:1987 141.89999:3343 150.7:647 155:318 158.8:2102 161.10001:1153 161.10001:2521 162.39999:1 165.2:44 166.7:1164 168.5:1782 171:2213 173.89999:1280 179.5:650 181.3:436 18…
Unknown	1546	11.4232	1101.54	[202.9]	202.9	5423.99	2687.4	151710	75167.4			-1	-1	-1	-1	51.2:0 53.2:0 59.1:357 60.3:2876 61.1:0 64:2506 65.1:1 65.9:8981 75.1:1 77.2:0 79.1:0 88.3:2120 89:0 92.1:3733 93.1:1 94.7:0 95.5:0 103:1311 104:424 107.1:0 110:1 114.9:9198 115.6:0 116.2:2937 117:627 118.9:1 120.1:1 123:0 127.3:1 128.10001:2461 131.2:450 132.2:0 133:1 133:2973 134.3:37 135.2:1 136:732 137.8:845 137.8:69 140.60001:603 142:1458 143:1215 143:3553 146.7:0 147.8:1053 149.10001:1 150:…
Unknown	1550	11.4321	1101.88	[174]	174	151358	379230	696766	1745759			-1	-1	-1	-1	54.4:20086 59.1:24918 64.2:3375 66.1:10712 73:149556 74.1:6704 75.1:1 76.1:9602 87.5:2542 90.1:3084 92:4270 101:4744 101.7:6474 102.4:11521 104:3048 108.1:1474 116.8:1 117.8:79 117.8:2029 122.1:438 124.6:2998 127.9:56974 129.89999:11530 130.89999:7329 142:336 143.5:1868 148.10001:6922 159.89999:1777 166.3:1005 167.8:287 168.7:1188 169.60001:9358 169.60001:1877 171.8:3224 174:151358 174.89999:2656…
Unknown	1555	11.4431	1102.31	[56.3]	56.2	59154.8	70859.1	390494	467757			-1	-1	-1	-1	56.2:59155 58.1:1 60.2:682 63.2:3951 65.4:5026 65.4:3078 66.2:3412 67.4:26575 76.2:3002 80.2:21653 84:0 86.2:25232 88.2:6044 90.2:1228 97.2:7058 100:27641 100.9:3543 102:6821 106.8:694 107.6:734 113.9:7749 115.5:1932 118.2:5314 124.2:1065 128:18192 128.60001:7043 129.60001:5973 131.7:1542 132.60001:2538 132.60001:66 136:2370 136.60001:855 137.89999:2597 143.39999:538 150.7:741 150.7:2596 153:1051…
Unknown	1572	11.4808	1103.75	[335.5]	335.2	2197.46	4378.85	271640	541294			-1	-1	-1	-1	53.2:21478 54.2:1549 56.2:20141 64:2565 64:472 66.2:8170 67:3983 68.1:3769 76.2:13666 78.2:34723 82.2:6054 82.8:6946 86.1:5667 91.8:386 91.8:8380 97.1:9926 99.6:7526 104.1:1742 106.3:3956 115.3:156 117.9:623 124:1641 127.9:746 128.8:4041 145.3:2701 150.89999:319 162.10001:1034 165.39999:1996 173.60001:1407 183.10001:516 184:37 185:409 185.89999:252 193.3:1850 195.3:599 196.10001:107 200.2:148 201…
Unknown	1595	11.5317	1105.7	[113.2]	113.2	7105.08	12647.3	277157	493348			-1	-1	-1	-1	50.3:7127 51.2:2565 58.3:2231 61.1:3431 61.8:4379 63.2:4119 64.1:1668 65.1:4242 65.9:3293 70:776 71.9:2208 76.1:7077 80.1:4570 80.9:8448 82.3:1869 83:1571 87.1:824 90.1:3958 92.1:3285 93.1:712 94.2:496 94.9:5749 98.9:4796 99.5:3423 100.9:3226 103:3493 105.9:1867 107:848 113.2:7105 114.1:1635 114.9:403 115.7:6031 116.7:1 120.9:4130 124.2:1367 125.5:702 127.1:2460 132.7:0 135.5:918 136.10001:1119 1…
Unknown	1598	11.5383	1105.95	[71.2]	71.2	44614.8	105022	513862	1.20962e+06			-1	-1	-1	-1	50.2:140 51.2:0 52.2:16449 54.2:2355 55.2:15257 56.4:10570 57.1:35609 58.1:130 59.2:5754 62:105 63:5363 63.8:2806 65.2:1343 67.2:5886 67.9:5807 69.1:4741 70.1:7181 71.2:44615 73:14519 75.1:28421 76.3:1204 77.2:5856 79.1:4305 80.2:4481 82:3189 83:832 84.3:11631 85.1:25607 86.6:2679 88:974 89.1:1758 91:4018 94.1:2538 95.8:3242 97:4566 97.9:4145 100:2479 101.3:115 104.3:1704 105.3:3750 110.2:3147 11…
Unknown	1625	11.5982	1108.25	[88.2]	87.9	1225.52	803.585	197292	129366			-1	-1	-1	-1	50.3:4025 52.2:3137 54.1:4288 55.1:216 56.2:302 57.1:0 57.9:332 59:636 60.2:499 61.3:1980 61.3:268 65.1:1553 65.9:2588 67:4426 67.7:3325 69.1:2027 71:3351 71.8:10981 71.8:5729 74:3484 75.1:558 76.1:8038 77:839 79.1:6601 83.5:2740 84.3:3160 87.9:1226 89:212 91.9:3184 93.2:5091 93.2:4441 97.4:3948 98.3:1286 100:841 100.8:1570 104.4:205 106:0 109.9:1196 110.6:952 116.9:1581 119.2:1185 120.1:0 121.1:…
Unknown	1653	11.6601	1110.62	[71.9]	71.9	11116.7	15663.8	158494	223323			-1	-1	-1	-1	52.2:5358 54.2:5753 63.2:11084 68.1:1505 71.9:11117 82.1:2126 85.8:5485 104.2:4583 107:1292 111.9:0 113.3:1532 115:1350 126.7:1987 129.2:3482 132.60001:2629 138.89999:706 145.39999:5358 147.60001:1443 148.89999:3834 155.8:167 159.5:1316 160.8:1046 163:1094 166.10001:1842 198:609 205.2:3468 211.3:10 212.60001:19 218.60001:514 222.3:358 229.8:176 231.8:87 246.5:285 249.5:1317 257.5:1069 259.10001:5…
Unknown	1665	11.6867	1111.64	[259.5]	259.7	10143.6	7978.83	189952	149414			-1	-1	-1	-1	71:14994 94.6:15813 111.9:3676 117:28587 129.5:11593 151.89999:3575 164.10001:1531 168.8:4605 173.5:2159 182.3:983 187.39999:10261 191.60001:6961 195.89999:802 210.2:754 212.2:467 217.3:1006 218.10001:932 229.39999:323 230.89999:583 233.2:1690 234:775 248.5:1150 255.10001:624 259.70001:10144 260.79999:2151 261.5:1749 263.10001:257 283.89999:150 287.60001:1705 287.60001:1105 293.5:1063 296.89999:2…
Unknown	1666	11.6889	1111.73	[258.6]	258.1	0.517578	0.372157	191051	137373			-1	-1	-1	-1	50.2:1 51.2:587 52.2:0 53.3:1 54.2:1 55.1:1 56.2:0 57.3:0 58:1 59.2:0 60.1:0 60.1:1 61.3:0 62:68 63.1:1 64:1 65:1 66.2:0 67:0 68:8723 69.1:1 70.4:0 73.1:0 74.1:0 75.1:0 76:0 77.1:0 79.1:1 81:0 82.8:1 84.1:1 85.2:1 86.1:0 87:1 87.9:4966 89:0 91:0 92.9:1 94.5:12912 95:1 95.8:1 96.6:1023 98.8:1 99.9:0 100.9:1 103.1:1 103.1:0 104:0 105.1:6679 106.1:0 106.1:0 107.1:0 108:0 109:1 109.9:0 110.8:1 111.5:…
Unknown	1669	11.6956	1111.98	[171.1]	171.1	14909.6	10063.7	325662	219816			-1	-1	-1	-1	52.2:9714 58.4:88735 67.9:7259 71.3:29323 84:1719 93.9:5139 121.2:18602 135.60001:6795 150.10001:10795 156.5:4602 163.8:1930 171.10001:14910 178.2:4045 184.7:11332 189.3:5638 190.8:9502 190.8:9632 195.8:2133 200.7:6548 201.89999:1534 216.10001:6843 221.89999:759 233.39999:138 235.60001:6529 236.5:9584 238.3:5918 240.10001:4684 242.7:12455 243.89999:6403 252.10001:9 255.7:38 278.5:414 278.5:212 28…
Unknown	1672	11.7022	1112.23	[167.3]	167.3	30814.5	23753.1	2.28033e+06	1.75777e+06			-1	-1	-1	-1	50.3:0 51.3:73487 52.3:80516 53.2:1 55.3:1 56.1:1 59.2:0 60.2:0 61.1:0 63.2:1 64.4:1 66.3:0 69.2:0 70.2:0 73.1:1 74.2:1415605 75.1:0 77.1:1 79.1:1 81.1:1 83.1:1 85.2:1 87.1:1 90.2:202705 96.2:0 97.3:20549 99.1:0 102:57969 106.1:0 109.9:1 110.6:1 124:27401 125.6:0 127.1:0 135:0 136.89999:60234 140.2:1 143:14613 144.39999:27179 148.8:0 153.89999:5937 154.7:1 158.3:11580 159.60001:1 161:1 167.3:3081…
Unknown	1673	11.7044	1112.32	[290.5]	290.4	13938.8	11433.4	1235753	1.01364e+06			-1	-1	-1	-1	50.3:0 51.3:104649 52.2:108323 53.3:0 55.2:0 56.2:0 59.2:0 60.2:1 61.2:1 62.2:14631 63.2:1 66.2:1 67.2:19091 69.2:1 70.2:0 73.1:0 74.1:1 75.1:1 77.1:0 79.1:1 80.1:22034 81.1:1 86.1:1 90.1:299467 99.2:1 101.2:242 102.1:54121 105.9:0 114:30531 131.8:139063 148.8:0 152.5:34053 154.89999:1 160.8:0 161.39999:1 167:30024 172.10001:0 172.8:0 174.8:12008 177:44636 177.89999:8237 179:1 186.3:41606 196.5:4…
Unknown	1676	11.7111	1112.57	[143.1]	143.1	279054	247770	2.10926e+06	1.8728e+06			-1	-1	-1	-1	50.3:80218 51.3:130137 52.3:109391 57.2:0 58.3:361432 65.4:0 67.3:5378 74.2:0 82.4:0 90.3:76288 94.1:24411 99.1:432375 110.1:34873 132:269782 143.10001:279054 155.89999:7813 158.39999:33213 161.8:23177 177.89999:20938 179.2:1 184:32617 190.60001:44393 194.2:1 196.39999:3006 202:7162 203:2280 206.7:1926 208.10001:1 220.2:0 222:715 224:0 231.2:1439 236.8:33750 243.7:46845 245.10001:9350 250.8:0 251…
(2S, 3R)-3 [(4E,7E)-Nona-4,7-dienoyl]-N,N-bis (trimethylsily)oxirane-2-carboxamide	1678	11.7155	1112.74	[74.2]	74.2	8430193	6.79194e+06	10371949	8356346			-1	-1	-1	-1	50.4:214213 51.3:192603 52.3:55161 63.2:21507 64.4:32664 67.2:84176 74.2:8430193 83:67604 87.2:86550 101.1:93182 110.2:23725 111.2:44745 124.1:274312 137.10001:91917 144.39999:86651 148.89999:3324 154.3:15489 161:57425 172.60001:127975 193.39999:216185 205.10001:4396 206.2:154 206.7:2770 212:0 224.7:3064 226.2:0 227.60001:6103 230.39999:846 244.8:58829 245.7:6147 254.89999:3597 267.29999:1007 271…
(2S, 3R)-3 [(4E,7E)-Nona-4,7-dienoyl]-N,N-bis (trimethylsily)oxirane-2-carboxamide	1680	11.7199	1112.91	[176.8]	176.8	268260	208365	5065316	3934363			-1	-1	-1	-1	50.4:35165 51.3:107040 53.3:26256 55.3:38955 56.3:28977 57.3:85067 59.2:165693 60.3:41890 61.3:57595 63.2:33262 64.4:65659 66.3:14865 69.3:191900 70.3:42631 73.2:1148234 75.2:35698 77.2:449462 79.2:194609 81.2:85848 83.2:3578 84.2:9314 86.1:14678 89.2:74798 91.2:57139 93.2:23719 95.1:16887 96.2:25437 97.3:14133 100.1:0 103.1:0 106.1:126701 107.2:8118 108.1:19333 114.1:107310 124.2:191640 140.2:67…
(2S, 3R)-3 [(4E,7E)-Nona-4,7-dienoyl]-N,N-bis (trimethylsily)oxirane-2-carboxamide	1682	11.7243	1113.08	[73.2]	73.2	28339896	34904552	81701416	100626728			-1	-1	-1	-1	50.4:47556 51.3:21841 52.3:0 53.2:44594 54.2:31501 55.3:114362 56.3:89440 57.3:20962 59.2:1752480 60.3:380658 61.3:342705 63.2:613506 65.5:210421 66.3:254859 69.3:488391 70.3:340186 73.2:28339896 75.2:7308216 77.2:6696924 79.2:443222 81.2:854265 82.3:33852 84.2:213005 85.2:280467 86.2:207457 87.4:8685 89.2:4939102 91.2:1517818 93.2:354589 95.2:315160 96.2:326380 99.2:1140405 100.1:769030 103.2:39…
(2S, 3R)-3 [(4E,7E)-Nona-4,7-dienoyl]-N,N-bis (trimethylsily)oxirane-2-carboxamide	1684	11.7288	1113.25	[116.2]	118.3	422993	447160	50349928	53226648			-1	-1	-1	-1	82.4:132807 84.2:456128 85.2:654655 86.2:694461 87.3:578679 89.2:14727925 91.2:4729940 93.2:978115 95.2:1033652 96.2:938634 97.3:77114 100.1:4133592 103.2:2062262 104.2:3967657 107.1:315432 108.2:221627 109.1:311254 113:1316109 118.3:422993 119.1:3245632 120.2:5650421 122.2:119675 126.2:197611 128.2:42480 158.89999:23145 188.2:248230 196.5:3987 206.89999:9772 208.3:6663 210.60001:566 211.3:4932 2…
Methanimidamide, N'-(2,3-dihydro- 1,5-dimethyl-3-oxo-2-phenyl-1H-pyrazol-4-yl)-N,N-dimethyl-	1689	11.7399	1113.68	[192.3]	192.3	5.18961e+06	16052978	298674336	923887232			-1	-1	-1	-1	50.4:109242 52.4:1 53.3:108618 55.3:325733 56.3:275869 57.1:174908 59.2:3986998 60.3:877768 61.3:891418 63.3:1394629 64.4:116948 66.2:382907 67.2:49447 69.2:1707369 70.2:959406 73.2:84978512 75.2:15287902 77.2:18525882 79.2:727004 81.2:2148638 84.3:395993 85.2:512054 86.2:587223 87.3:489188 89.2:12318267 91.2:3937608 93.2:827514 95.2:854747 96.3:819520 100.1:3866677 103.2:1864512 104.1:3644990 10…
Benzo[1,2-b: 5,4-b']difuran-4,8-dione, 2-[1-(hydroxymethyl)vinyl]-5-methyl-	1693	11.7487	1114.02	[258.1]	258.1	78016392	214251808	95386424	261954096			-1	-1	-1	-1	67.2:80120 157.10001:9718 158.5:69931 163:272866 165.10001:682625 166.10001:140459 172.3:346099 176.2:263144 181.10001:293544 183.3:711764 185:520177 194.39999:280579 195.3:64316 199.2:1045982 203:3165 203.8:21346 208.39999:17103 208.39999:20127 211.60001:12269 214.2:1805013 219.3:41530 221.3:7326 223.10001:14983 224.89999:10965 225.60001:14278 226.3:23006 226.8:39706 226.8:15847 227.3:55294 228.…
Phenylpropanolamine, 2TMS derivative	1698	11.7598	1114.44	[116.2]	116.2	6799618	4927956	80519536	58355736			-1	-1	-1	-1	50.4:195441 52.3:0 53.2:68668 55.3:188734 56.3:146904 57.3:170452 59.2:1814560 60.3:338687 61.3:350298 63.2:657283 66.3:195320 67.4:15318 69.3:913435 70.2:397714 73.2:35332248 75.2:6193487 77.2:7407222 79.2:584738 81.2:804757 84.2:251816 85.2:216463 86.2:204781 89.2:3768842 91.2:1189218 93.2:238335 95.2:181665 96.2:318238 100.1:750886 104.2:731412 106.2:234059 107:65517 108.1:238818 109.1:62643 1…
2-Propen-1-ol, 1-[(1,1-dimethylethyl)dimethylsilyl]-	1699	11.762	1114.53	[73.2]	73.2	17519460	13109332	73155720	54740424			-1	-1	-1	-1	50.5:111908 53.3:177948 54.2:11373 55.3:83228 56.3:63553 59.2:1098920 60.3:273049 61.3:273389 63.3:271778 65.4:156994 66.2:143428 69.3:579004 70.3:310295 73.2:17519460 75.2:6264922 77.2:5128345 79.2:637100 81.2:694742 82.3:86772 84.2:89233 85.1:209955 86.2:154276 89.2:3949630 91.2:1407004 93.2:337206 95.2:437215 96.2:280976 99.2:363448 100.1:1094941 103.2:752627 104.1:1045344 107.1:116635 108.1:1…
Acethydrazide, N2-[4-(thiitan-3-yloxy)benzylideno]-	1701	11.7664	1114.7	[99.2]	99.2	1593623	1.41361e+06	19282042	17103954			-1	-1	-1	-1	50.4:190236 51.3:9536 52.3:1 53.2:110359 55.3:177317 56.3:151337 57.4:60595 59.2:905941 60.3:427623 61.2:139932 63.2:358880 66.3:180423 69.3:632240 70.2:287680 73.2:7092588 75.2:2286590 77.2:1753798 79.2:759320 81.2:172397 84.1:59472 85.1:33464 86.2:7526 87.3:28115 89.1:101 93.2:15419 96.2:72241 99.2:1593623 100.1:0 103.2:110146 104.1:0 106.1:0 107.1:1 108.1:238 109:1 110.2:2766 111.1:0 113:0 116…
Unknown	1704	11.7731	1114.95	[137]	137	146979	142119	1.18583e+06	1.14663e+06			-1	-1	-1	-1	50.4:21965 51.3:115462 52.2:253044 58.3:132488 64.3:17386 67.3:36788 97.6:27719 99.1:6141 125.1:15148 127.9:2443 137:146979 140.3:4220 140.8:6483 167.2:32087 176.8:137731 178.5:10973 186:31074 193.39999:96518 202.5:2945 217:10556 222.10001:2454 223.7:1030 237.5:5483 243.89999:19422 245:23181 245.5:96 267.70001:1160 274:4817 292.60001:2645 312.39999:533 312.39999:396 340.5:0 346.29999:102 359.6000…
Unknown	1710	11.7864	1115.46	[71.4]	71.4	38812.5	43323.7	600485	670279			-1	-1	-1	-1	51.2:81968 52.2:219499 58.1:20377 62.1:10123 71.4:38813 92.1:79 99.1:24128 105.1:18915 121:7374 124.1:1609 128.8:1500 131.8:4637 142.89999:10307 144.89999:1268 148.2:6735 150:8741 152.10001:5740 156.39999:1750 161.8:4111 163.8:3032 174.8:2087 175.39999:6961 177.89999:2512 179.7:2741 185.8:1249 186.39999:597 187.60001:26578 190.10001:8260 196.2:664 201.60001:664 212.8:1604 215.89999:3178 216.5:173…
Unknown	1727	11.824	1116.9	[217.7]	217.7	9127.73	19480.2	444340	948301			-1	-1	-1	-1	51.3:31429 52.2:68373 59.9:9401 67.9:829 71.2:17145 76.2:70436 83.5:14660 83.5:9291 88:4162 94:8553 96.8:4522 102.6:11254 111.3:3051 112.2:4840 114:2467 117.3:13797 121.1:5325 129.10001:1598 132.5:7664 138.89999:1552 143.60001:8091 144.60001:1799 150:2576 151.60001:2529 153.89999:2890 162.3:3351 164.3:2799 167:2192 168.89999:4456 170.8:5842 173.89999:7767 177.60001:2365 178.2:1090 179.89999:308 1…
Unknown	1729	11.8284	1117.07	[258.6]	258.2	0.737	0.399945	228733	124126			-1	-1	-1	-1	52.3:5949 53.2:162 56.4:792 59.1:0 60.3:3609 61.2:0 62.3:3649 63.2:1 65:1676 65.6:5233 66.3:218 67.9:69 68.4:4018 69.2:1 70.1:11674 71.2:864 73.1:1 75.1:1 77.1:1 78.2:9353 81:1 84:1 89:1 90.6:9884 91.1:3125 92:915 95:3839 96.1:1670 96.1:6767 99.9:1 102.7:2911 103.9:4229 104.5:5154 107.2:2578 108:119 111.7:3038 112.4:1002 113.7:812 114.8:1 115.5:6536 116.2:1 118.1:410 118.1:3809 118.8:2356 120.1:0…
Unknown	1755	11.886	1119.28	[248.2]	248	13782	19900	246719	356242			-1	-1	-1	-1	51.2:4156 52.3:4096 64.1:198 65:1042 76.2:3260 79.1:17484 82.9:3311 87.1:5315 87.1:5753 87.1:492 88.1:1496 92:1277 92:3763 94.1:1402 94.6:64 100:7023 106:2485 108:2509 109.9:240 113:1031 114.7:695 126.5:200 129.3:579 131.89999:864 133.2:4145 133.2:6928 136.3:2668 139.60001:269 140.8:1273 142.8:5576 144.3:991 144.3:1924 145.7:1977 161.39999:646 162.7:3558 162.7:716 170.3:903 171.2:1020 171.89999:1…
Unknown	1771	11.9214	1120.64	[109.2]	108.9	8457.07	22836.3	228748	617679			-1	-1	-1	-1	51.2:1 52.2:1595 53.2:9868 54.4:486 55.1:364 55.1:169 67.2:9147 69.1:332 76.2:11879 81.3:260 83.2:4437 83.7:2093 84.7:1341 92.8:2004 92.8:684 94:1297 95:3287 104.1:1 105:4584 106.5:3685 108.3:2761 108.9:8457 108.9:10458 110:2437 112.4:194 118.2:1915 122.4:1247 123.3:970 123.3:2819 124.4:572 128:1029 136.89999:8704 137.7:1041 138.3:1 139.3:141 145.5:2633 148.10001:5500 151.39999:1305 153.60001:166…
Unknown	1792	11.9679	1122.42	[168.9]	168.9	10147.9	11376.7	452354	507131			-1	-1	-1	-1	50.3:950 51.3:6610 52.2:11500 53.3:6156 54.9:0 56.1:3322 57.1:4312 58.2:3452 59.2:7220 60:2065 60.5:3102 61.2:2375 63:435 65.3:3982 66.1:4754 67.1:3139 67.9:8244 68.4:11351 69.2:1482 70.2:2290 71.4:872 72:2628 73:0 75.1:0 78.2:15777 79.1:9561 80.2:16317 82.2:1935 83:4241 84:1 84.9:3835 85.7:2634 86.2:4216 87.1:1478 94.7:3631 96.8:814 100:1916 101:3180 101.7:3770 102.6:2894 103.2:1 104.6:6259 112.…
Unknown	1794	11.9724	1122.59	[167.8]	167.8	66264.3	153378	493470	1.14221e+06			-1	-1	-1	-1	52.2:24899 54.2:1607 57.1:3847 62:283 62.9:5910 62.9:5303 67.1:1266 76.1:43023 79.1:36426 85.3:8297 91:3884 92.9:1894 94.2:10224 95.2:5255 96.1:3018 96.7:2695 98:52 99:4428 102.1:6378 102.9:4698 105:5431 105:5309 107.8:825 111:214 112.1:1301 117.7:207 122:6756 122.8:2454 123.4:2032 127:2408 132.3:6015 133.89999:4394 136.2:4180 138.10001:3771 139.8:3873 139.8:4403 141.8:1696 145.5:3311 147.8:8946 …
1-BUTYL-1-ETHYLHYDRAZINE; EI-B; MS	1796	11.9768	1122.76	[138.1]	138.1	16151.9	26666	1.79086e+06	2956635	CCCCN(N)CC	GGVXCUYZOPPOAM-UHFFFAOYSA-N	888.353	618.564	615.385	844.955	50.3:4046 51.2:3661 52.2:16235 54.1:3690 54.9:0 55.5:4039 56.3:0 57.2:1325 58.1:0 58.9:9310 58.9:11987 59.8:4311 60.5:1 61.4:0 62.3:0 63.2:2157 65:1878 66.1:5092 67.9:4892 69.3:0 70.2:5572 70.2:9760 71.2:1 73.1:1337384 75.1:1 77.1:4430 79.1:16990 82.2:2694 82.9:1 84:669 85.5:254 86.1:418 86.8:381 87.8:1395 88.9:2753 88.9:7509 90.8:2498 90.8:3376 91.8:7724 94.2:11650 95.3:6662 96.1:2631 96.9:2291 …
Unknown	1810	12.0078	1123.95	[219]	219	31692.6	30036.5	247366	234440			-1	-1	-1	-1	53.2:6295 55.1:249 58.1:5035 63.1:6037 64.1:45 76:14890 80.1:23598 84.9:2498 95.9:2302 98.7:3510 120:3649 122.3:3594 122.3:1879 123.8:91 125.6:770 129.8:3058 137.8:4335 140.7:1121 141.60001:27 142.2:1 152.3:255 154.8:432 156.10001:965 162:1230 164.60001:730 165.3:422 166.60001:961 167.89999:1061 168.8:1311 170.10001:1326 174.60001:7389 176.60001:1364 177.2:523 179:350 180.60001:415 181.7:6 184.7:…
Unknown	1813	12.0144	1124.2	[174.9]	174.9	16460.2	18526.9	480405	540722			-1	-1	-1	-1	51.2:11048 52.2:30070 57.2:2377 58:8623 61.2:5984 61.2:12298 63.8:2586 64.5:999 65.1:4728 68:2327 69.2:3232 70.2:7258 71.3:7607 75.1:5909 79.1:15279 81.9:8600 82.6:2712 87.1:10655 90.1:252 91.1:7487 93:4463 93.8:5366 94.7:6819 97.2:398 101.2:4940 102.1:7332 102.9:7605 103.8:3629 104.4:6481 106.9:0 108.1:681 108.8:1883 109.6:1728 110.3:1063 114.7:4841 115.7:7093 116.9:6485 124.8:1861 127.3:4953 12…
Unknown	1819	12.0277	1124.71	[101.1]	101.1	34266.5	31192.9	932465	848826			-1	-1	-1	-1	50.2:15715 53.3:11159 55.2:9690 58.2:9352 59.1:4536 60.3:10487 61.1:6107 63.1:11474 66.4:27391 66.4:23503 67.2:1129 73.1:252748 75.1:58184 77.1:10460 78.1:57473 81:4360 81:4585 83.1:7362 86.2:18416 87.2:12701 87.8:2652 89.2:731 89.2:4606 92:6891 95:1913 98.3:2658 100:16285 101.1:34267 102:648 104.7:4368 106.2:703 109.9:778 114:6949 114.9:296 118.2:4860 119:2690 119.9:3577 120.9:4112 128.89999:174…
Oxalic acid; GC-EI-TOF; MS; 2 TMS; BP	1823	12.0366	1125.05	[146.8]	146.8	5362372	10424552	12422759	24150076	OC(=O)C(O)=O	MUBZPKHOEPUJKR-UHFFFAOYSA-N	747.557	681.336	777.778	838.281	51.2:8799 52.2:18152 54.3:13190 55.2:11869 56.2:176725 57.2:11917 59.2:302319 60.1:14284 61.1:26592 61.9:859 63.1:3175 65:2951 66.1:50052 68.2:13495 69.4:8737 70.1:99431 71.2:164028 73.1:1797454 75.1:298148 77.1:18335 79.1:14220 80.2:14800 81.3:5417 82:3120 82.8:1752 84.2:17017 86.1:258667 87.2:17350 88:23082 88.7:7019 89.2:11064 89.9:2057 91.4:5129 91.4:4416 92.1:5713 93:3064 94.5:3975 95:4196 9…
Unknown	1825	12.041	1125.22	[150.4]	150.7	4808.54	3254.64	399511	270408			-1	-1	-1	-1	50.3:657 55.2:395 60.3:8196 61.1:1383 63.9:1431 66.2:2344 67.1:11062 73.1:9656 74.3:12955 75.1:17855 81.1:2418 82.1:3887 86.1:16926 87.2:21123 89.1:652 91:3137 93.1:3757 94:2803 94:3835 95:7631 95:2553 101.9:2692 103.3:493 104:11529 104.5:17673 105.1:365 108:1667 108.9:553 109.9:2408 110.6:2417 111.3:1424 113:2262 114.1:1086 114.9:3175 116.5:10480 121.6:1536 123.8:1776 124.5:980 126.1:228 127.1:7…
Unknown	1828	12.0477	1125.47	[101.2]	101.2	35411.6	25436.7	501749	360415			-1	-1	-1	-1	50.2:2604 52.2:5193 53.3:19420 54.1:4575 55.2:3824 56.2:7424 60.2:2509 63.9:215 67.2:3019 68.2:1941 69.2:5136 70:1968 71.1:16195 76.2:27852 79.1:4652 84.2:1221 84.2:1949 87.3:5709 88:2781 91:3723 92:7131 101.2:35412 102:8776 102.9:9294 104.6:2321 105.1:17254 107.7:1041 110:408 112.9:112 113.7:1090 115:3774 118.8:3244 118.8:6442 119.8:3600 119.8:1783 121.3:136 123.1:373 124.5:1799 124.5:524 127.9:…
Unknown	1846	12.0875	1127	[71.3]	71.1	11052.5	9772.27	3.19896e+06	2.82843e+06			-1	-1	-1	-1	50.3:8672 52.2:9735 53.2:4084 54.2:0 55.2:12586 56.1:0 59.2:77904 60.3:19674 61.2:32546 62.1:3353 63:5042 64.1:1526 65.1:3073 66.1:0 68:0 71.1:11052 73.1:1233622 75.1:192143 79.1:18593 81.1:5993 84.1:15711 86.1:57080 87.1:42260 89.2:1 91.9:3970 93.1:1556 94.9:1 96.1:906 98:3995 100:1 102:25679 103:10782 104.1:3400 112:1 114:11590 117:17791 119.7:1363 123.7:431 125.9:128 130:420676 131.2:22765 132…
Unknown	1848	12.0919	1127.17	[176.1]	176.1	38350.5	28229.8	648882	477642			-1	-1	-1	-1	50.3:4976 51.3:2965 53.3:8395 54.1:3661 56.2:7733 58.3:7840 59.1:15137 61.1:2975 62.3:3253 65:4593 67.1:137 68.1:1228 70.2:4377 71.3:0 73.1:173 76.2:37894 77.1:12145 84:6572 86.1:11946 89.1:6516 94.1:7602 95:180 96.8:5875 97.8:4384 98.7:828 100:7270 101.9:6191 103.7:10836 105.1:1745 107.7:4221 107.7:5768 111.2:287 114.1:7205 115.9:7507 117:4197 118.2:6832 119.1:3742 120.1:1 121.6:1455 122.7:704 1…
Unknown	1850	12.0964	1127.34	[100.9]	100.9	28290.3	22637.2	573204	458663			-1	-1	-1	-1	50.3:7844 54.2:22781 57.3:33762 59.2:16149 60.1:15043 61.2:12788 63:1231 64:1589 64.8:5505 67.2:1958 68:20944 69.2:6495 75.1:27396 76.1:5993 80.2:17676 86.1:11511 87.2:15205 88.1:19702 90.1:3625 94.1:8365 96.9:2 100.9:28290 102:2690 103.2:6978 104.1:2493 106.9:1 109.7:2291 111:793 117.2:8148 121.4:174 125.9:1503 130.10001:27885 132.89999:27092 133.89999:3011 137.10001:0 138.8:1782 140:1145 141.8:…
Ethyl(2-hydroxyethyl)carbamic acid, O,O' bis(trimethylsilyl)	1853	12.103	1127.6	[73.1]	73.1	4999573	9728108	13703738	26664566			-1	-1	-1	-1	50.2:5472 51.3:18025 52.2:52149 53.3:19093 54.3:21992 55.1:30769 56.2:110929 57.3:25908 58.3:181136 59.1:321286 60.2:40236 61.2:121846 62.3:3523 63.3:8824 64:1857 66.1:19478 67.3:7703 68.1:25472 70.2:125161 73.1:4999573 75.1:776082 76.1:21863 77.1:42427 79.1:65742 81.3:6731 82.1:8850 82.6:9065 84.1:75512 85:17720 86.1:241153 87:124735 88.2:20681 89:49747 90:6483 91.1:9577 93.1:1674 95.2:1069 96.2…
Unknown	1856	12.1097	1127.85	[74.2]	74.2	271197	262821	1.37386e+06	1.33142e+06			-1	-1	-1	-1	51.3:13875 53.2:33230 55.2:5411 56.3:10674 61.1:1726 67.2:4087 70.2:2567 73.1:2062 74.2:271197 75.1:11512 76.1:31923 78.2:15249 82.8:4702 85.1:6949 86.1:26207 88.2:3952 89:5092 90.4:4748 91:339 94.9:4442 95.8:7827 97:5758 100.1:26646 101:7250 102:9980 102.9:9471 104:8215 105:4245 106:588 106.5:4552 106.5:1596 109.4:3294 110.3:3461 111:4186 112.1:5165 114.2:146 115:12392 115.9:6320 117.2:14183 118…
Unknown	1858	12.1141	1128.02	[175.8]	175.8	26928.3	21553.9	733468	587081			-1	-1	-1	-1	50.2:8113 52.2:6198 53.2:23613 54.3:5307 56.2:1512 57.2:16686 58.2:4528 59.1:3410 62.2:3888 63.2:4233 64:1910 66.2:5566 68:3005 69.3:8424 71.1:21620 76.2:8830 77.1:821 78.1:70174 80.2:21512 84.1:2584 89.2:201 91.1:12511 92.8:3662 93.4:14212 95.7:5005 97.1:4321 98:2641 105.7:0 106.9:2975 108.7:1508 116:14688 118.6:4025 119.4:20028 120.8:8146 122.7:636 124.4:2533 126.7:339 127.5:2989 128.2:3518 132…
3-Desoxo-3, 16-dihydroxy-12-desoxyphorbol 3,13,16,20-tetraacetate	1860	12.1185	1128.19	[191]	191	86001.3	196619	6985064	15969474			-1	-1	-1	-1	50.2:14164 51.3:5696 52.2:40489 53.3:9576 54.3:20546 55.2:16776 56.2:65284 57.3:28451 58.2:107379 59.1:153960 60.4:12304 61.2:59715 62.3:3326 63.1:9124 65.7:1994 66.3:7462 67.7:13516 68.3:18304 70.1:77845 73.1:2337866 75.1:372607 76.3:34445 77.1:35124 79.2:52588 81.2:951 82.1:9193 82.1:9366 84:41640 85:15030 86.2:110033 87.1:55188 89:39833 90.3:4708 91:11352 93.1:5944 95.2:2217 98.3:4098 100:7123…
Unknown	1862	12.1229	1128.36	[245.5]	245.5	11505.4	23713	565384	1165274			-1	-1	-1	-1	53.2:10256 60.3:16487 62.1:6425 67:1818 68.1:19009 69.3:13637 71.2:25037 81.7:14866 89.9:6683 92.5:29665 93.9:6961 97.9:6134 98.8:12688 108.6:2029 109.7:3539 113.1:7297 120:15320 120.8:13203 122.3:3789 126.1:499 126.8:4663 132.8:33444 132.8:23466 134.60001:870 136.8:572 140.89999:18 145.5:10733 149.2:8744 154.8:613 155.8:2229 156.7:997 165.3:2888 169.10001:1410 169.8:5746 176.60001:2075 176.60001…
Unknown	1868	12.1362	1128.87	[144.9]	144.9	11418.1	22066.5	338602	654381			-1	-1	-1	-1	52.2:5066 54.2:1476 62.7:4050 63.3:4505 65:2749 69.2:1440 69.9:577 79.1:30442 81.1:1894 81.1:6952 82.1:2649 82.8:3895 90:1665 90.9:2806 91.9:2599 96.1:3216 96.8:3148 98:605 98.8:706 99.4:17407 100:5395 103:6342 103.9:2743 106.9:1482 108.1:288 110.2:277 111.2:994 112.4:3005 113:2211 114.9:6133 118.7:3756 118.7:1335 122.9:846 123.7:1530 126.8:302 136.5:600 137.5:1802 138.10001:694 138.89999:88 139.…
Unknown	1874	12.1495	1129.38	[50.2]	50.2	42911.6	24430.8	306618	174567			-1	-1	-1	-1	50.2:42912 50.2:42912 52.3:1 55.3:0 56.2:0 58.3:1 59.1:1 61.2:0 64.3:2323 66.1:1792 67.2:0 68.1:2023 69.9:4663 73.1:0 75.1:0 76:5008 79.1:1120 82.6:3890 84.1:1 85.1:288 85.9:1 87.1:1 88.1:2805 89.1:0 90.9:2341 93.1:1509 97.5:2710 98.9:2705 100:0 102.2:2128 105.7:4646 107.9:88 108.9:509 110.1:1438 112.1:647 114.1:1 116:0 116.6:0 117.8:1627 118.8:2910 121.5:818 125.5:156 125.5:273 126.8:964 127.4:2…
Unknown	1881	12.165	1129.97	[72]	72	9848.05	6720.06	246100	167933			-1	-1	-1	-1	50.2:341 52.3:12997 54.8:6930 55.3:1142 56.1:1 57.1:1551 58:3676 59.1:1 60.8:5998 60.8:1314 62.9:1361 64.1:1212 64.9:2709 64.9:55 66:1887 66:5042 67:4001 69.2:151 72:9848 73.1:0 74:21085 75.1:4090 76:1918 81.2:117 82.1:1944 86.1:0 87.1:881 88.4:1629 89:1312 93:1246 94.9:1144 96.7:525 100.1:5024 100.1:6194 102.3:1 103.9:6132 104.4:1060 105.8:72 107.6:684 108.5:2610 109.2:244 112:2762 113.1:430 114…
Unknown	1906	12.2204	1132.1	[72.2]	72.2	10926	9503.38	244757	212888			-1	-1	-1	-1	50.3:2822 51.3:3029 52.2:2391 53.2:3461 54.2:1123 55.2:496 57.2:370 58.8:1 60.2:1542 61.1:0 63.1:2980 64.4:513 65.1:1561 66.4:0 68.1:1805 70.3:2598 72.2:10926 73.1:1 75.1:0 76.2:15628 77.1:3007 79.1:11358 80.3:10528 82.1:2318 83.9:2090 86.4:2989 86.4:840 88.1:868 88.8:1 89.6:1066 91:1 97.8:525 100.2:1 101:4490 101.9:2068 102.8:2892 103.4:3765 104:2528 105.2:3380 107.9:1366 109.8:1609 109.8:3092 1…
Unknown	1915	12.2403	1132.86	[166.9]	166.9	60780.3	128103	754635	1.5905e+06			-1	-1	-1	-1	50.2:3569 51.3:5863 52.2:12629 54.2:2172 55.2:1 57.1:429 58.3:9068 58.9:1 60.2:1 61.2:2571 62.3:3438 64.3:1121 65:7815 66.1:5697 67.2:951 69.1:22563 70.4:7700 73.1:1 75.1:0 77.1:1731 79.1:15849 81.2:5687 83.2:1298 85.1:7538 86.2:248 87:2797 88.6:5611 89.2:0 91.7:3683 93:3169 94:2764 95.1:5118 96:5006 97.2:2177 98.9:6024 100.1:1 101.7:6048 103.3:1 104.7:0 105.9:1507 106.9:2795 108.2:5021 108.9:517…
Unknown	1916	12.2425	1132.94	[357.5]	357.7	12978	11856.6	548397	501012			-1	-1	-1	-1	50.2:8553 51.3:13091 52.3:11817 53.3:12505 54.2:7447 55.3:2013 56.1:3006 56.9:0 59.1:0 60.9:863 63:3748 66:3558 70.1:8012 73.1:0 75:15561 77:4886 79.2:33226 82:3785 82.8:3549 83.9:0 86.1:1 87.1:3207 88.9:2537 89.9:3014 91.1:0 91.9:6230 93.1:4422 94.1:853 96.9:2261 99:2029 100:1 100.8:4905 101.4:2691 101.9:7558 103.1:0 103.9:0 105.2:3117 105.8:2747 105.8:2453 106.3:2978 108.1:2871 109.2:1667 111:2…
Unknown	1920	12.2514	1133.28	[268.8]	268.8	81108.9	163622	1.36461e+06	2752848			-1	-1	-1	-1	55.2:8498 55.2:8380 56.1:1 56.7:1 57.9:7793 59:1 60.1:4237 60.9:1 62.1:1 62.8:5199 63.3:3047 65:7391 66:952 66.8:14398 66.8:15792 67.8:4823 69:47712 69:46384 71.3:9098 73.1:229065 75.1:8939 77.1:1 81.1:3613 81.9:1621 83.8:1 85.8:1 86.6:0 87.6:1514 88.8:796 89.6:1843 91.3:0 93:5630 95.1:4764 96.2:4682 98:4001 98.7:16282 99.2:16341 99.9:1 103.3:0 103.9:2909 105.5:284 107:4666 108.2:7811 111.1:1202 …
Unknown	1921	12.2536	1133.37	[73.1]	73.1	229177	204234	1.18213e+06	1.05347e+06			-1	-1	-1	-1	50.2:1 51.3:1042 52.2:23013 54.4:1070 55:7504 55:8390 56.3:0 57.2:5239 59.2:1 60.2:6124 61.1:1 63.3:7442 64:2172 65.3:2717 66:1029 73.1:229177 75.1:6034 77.1:1 79.1:34162 82.2:2694 84:0 86.1:1 86.9:1014 87.9:6667 89.1:1 90.9:1 91.6:4939 92.8:502 94.9:5457 95.9:1801 98.1:4305 98.8:1462 99.9:0 103:1 104:2678 104.8:0 105.8:4266 107.2:5107 107.2:5718 110:4160 111.4:6116 112.3:2796 113:265 115:0 115.8…
Unknown	1925	12.2624	1133.71	[248.7]	248.7	34301.2	83061.6	1.51495e+06	3.66851e+06			-1	-1	-1	-1	50.2:2749 53.2:16607 57.2:8048 67.1:13156 67.7:8812 68.3:7759 71:6456 76.1:21692 78.2:81114 93:14602 97.8:1534 99:805 100.8:7572 101.6:7062 102.2:8950 103.9:0 110:8680 113.6:3498 118:400 120.2:2278 123:1939 124.2:2428 133.7:7519 136.10001:853 139:327 141.3:6512 142.89999:6772 148.39999:0 150.60001:6953 153.89999:6577 155:2741 157:8421 158.8:1023 168.39999:6500 171.5:1018 172.2:1916 172.8:1257 174…
Unknown	1928	12.2691	1133.96	[147.9]	147.9	31196.4	22189.2	466531	331832			-1	-1	-1	-1	53.3:8766 54.7:7722 58.1:6083 63.1:1 64.1:732 65.2:1994 67.2:2825 68.1:5650 69.3:2480 82.6:98 85.1:2551 88.3:983 90:2973 97.8:236 103.8:1 103.8:1 109.8:1264 111.8:92 118.3:6643 120:9329 126.2:304 126.2:9156 127.6:2427 128.89999:515 136.89999:1502 142.60001:437 147.89999:31196 149.39999:4529 154.10001:3141 156.89999:1845 166.89999:13132 168.2:878 179:983 180.10001:289 180.8:183 187.10001:2899 191:…
Unknown	1931	12.2757	1134.22	[71.3]	70.9	16020	13501.5	367081	309372			-1	-1	-1	-1	51.3:3045 57.1:1425 58.2:15939 64.2:2605 69.1:30039 70.9:16020 76.2:4765 78.1:8136 80.2:16277 83.1:8606 93.9:1202 97.8:6220 104.1:7783 106:3509 118.1:5579 119.8:6801 129.7:12378 135.89999:1035 137:968 143.2:2026 148.89999:60680 152.89999:893 156.39999:2937 157.2:1069 171:1541 172.8:549 175.3:784 176.8:1655 176.8:2212 184.39999:660 184.89999:600 186.8:665 190.8:13429 192.8:2862 193.7:1484 195.3:12…
Unknown	1934	12.2824	1134.47	[102.1]	102.1	90488.2	73485.8	643633	522696			-1	-1	-1	-1	50.3:4605 51.3:9978 52.2:12874 53.1:1 67.2:17330 80.3:18457 83.1:3400 92:1014 93:3897 101.1:42452 102.1:90488 104:21542 107.6:7015 109.1:2288 109.9:1202 120.1:16272 122.1:1048 122.8:1477 134:57852 134.7:138075 135.8:4810 139.2:3152 143.2:10452 143.2:5866 157.2:11531 161.10001:30766 169.89999:769 171.7:1066 174.89999:16807 176.8:794 181.3:1 182.89999:1047 186.60001:1005 191.8:12321 195:152 196.899…
Unknown	1937	12.289	1134.73	[57.2]	57.2	82615.9	64197.1	472530	367182			-1	-1	-1	-1	50.2:15637 51.3:20989 57.2:82616 68.2:1 80.9:7604 82.7:7223 82.7:5045 90.2:68531 94:9243 97.6:7403 106.1:24914 107.1:8551 108:3447 122.1:6171 136.89999:7462 151.89999:7189 155.7:1035 156.5:3621 164.60001:27971 167.89999:2547 171.10001:771 177.3:5051 183.60001:798 184.89999:1 194.89999:0 196.10001:32 198.10001:887 198.10001:193 200.39999:354 201.39999:0 206:18647 206.89999:28665 211.5:975 212.8999…
Unknown	1941	12.2979	1135.07	[79.2]	79.2	301665	523048	1.61762e+06	2804747			-1	-1	-1	-1	50.4:50290 51.2:113229 52.3:137361 64.3:7774 77.2:68954 79.2:301665 80.3:12092 81.2:14203 87.2:329133 95.9:4655 96.5:2637 109.5:1 110.1:0 116.1:384789 121:21824 127:21796 138.3:5628 169.3:5397 170.3:2136 176.89999:11502 195.7:165 199.60001:0 212:707 213.89999:2813 214.60001:4488 215.39999:85 225.3:1127 231.60001:4086 231.60001:7360 242.60001:640 243.89999:15 244.7:1574 248.10001:1972 253:1453 253…
Unknown	1943	12.3023	1135.24	[151.8]	151.9	57269.8	57153.6	648291	646975			-1	-1	-1	-1	51.2:5174 52.2:15013 53.3:44145 55.3:0 56.3:21589 59.2:1 60.3:3470 61.2:3638 62.2:24287 63.2:4805 66.3:1 68.4:31950 70.2:1 75.2:0 77.1:51253 81.1:20070 82.1:7765 92.2:9752 93:23338 94.7:2783 94.7:18177 95.8:4817 97:9792 107:50808 108.3:1 108.3:5508 111:6286 120.7:12199 122:9374 123.5:1 124.9:2111 125.7:5408 127.1:16235 134.89999:1 138.10001:6290 140.10001:0 151.89999:57270 154:2924 154:2008 155.5…
5,6-Dihydrouracil; GC-EI-TOF; MS; 2 TMS; BP	1944	12.3045	1135.32	[134.9]	134.9	2.19287e+06	2519383	91245760	104832064	O=C(C1)NC(=O)NC1	OIVLITBTBDPEFK-UHFFFAOYSA-N	817.853	573.51	422.222	801.409	50.3:1 51.4:107998 52.2:188325 53.2:188290 55.2:308768 56.3:265522 59.2:7230386 60.3:497430 61.2:731471 62.3:52067 63.3:34823 66.3:919586 68.1:27307 70.2:3000770 73.2:45238300 75.2:5833331 77.2:283768 79.2:256490 82.3:3718 84.1:318018 86.2:4245866 89.2:4025854 91.1:99227 93:21080 94.4:14201 95.1:28531 97.1:11729 100.1:6512634 103.1:2483896 105.1:204161 107.2:53540 108.1:6590 109.2:5616 110.2:1555…
Oxalic acid, 2TMS derivative	1946	12.3089	1135.49	[73.2]	75.2	10874751	11976407	45253352	49837696			-1	-1	-1	-1	53.3:195046 54.4:46683 55.3:448014 56.3:346404 59.2:10281739 60.3:1065669 61.2:1138729 62.3:68634 63.3:37238 66.3:1227563 70.2:4147918 75.2:10874751 77.2:386453 78.2:10685 81.2:10292 108.9:6650 109.8:17379 119:23 121:132850 122.7:8249 123.5:5355 124.2:4651 126.1:9745 131:77427 133:3002237 139.89999:11399 139.89999:34834 141.89999:1 144.10001:32725 147:1 152:1 152.89999:10147 152.89999:10480 154.1…
Disiloxane, ethylpentamethl-	1953	12.3244	1136.08	[119]	119	3.57794e+06	10789204	161980208	488447616			-1	-1	-1	-1	50.3:1 52.2:0 53.2:53030 55.3:371031 56.2:298200 59.2:8951925 60.3:876417 61.3:952374 63:26841 66.3:1066676 70.2:3700242 73.2:79085240 75.2:9557651 77.1:258570 79.4:1 84.2:428029 86.2:11473574 87.3:1119738 89.2:9501602 91.1:477930 92.4:31882 93.9:12525 95.2:19342 96:1687 100.1:16496714 103.1:8460198 105:1266472 110.6:19355 113.1:191531 115.1:1224729 117.1:1461336 119:3577942 121:187879 122.2:1545…
Disiloxane, ethylpentamethl-	1955	12.3289	1136.25	[147]	147	113679584	330223936	255246496	741456832			-1	-1	-1	-1	64.5:7069 68.3:13733 68.3:6494 82.1:0 92.7:17189 94.4:11478 108.4:5223 109:4675 111.6:24125 113.1:291339 115.1:1059028 117.1:2543029 124:3462 126.2:1 131:11147498 133:51733388 138.5:15176 139.89999:15228 142.10001:1 144.10001:1075530 147:113679584 153.7:4899 154.60001:0 158:735911 160:11484309 162:2314298 162.89999:2043838 167.39999:13669 168.2:2968 171:16206 171.8:19540 174:4907870 178.60001:160…
Disiloxane, pentamethyl-2-propenyl-	1960	12.3399	1136.68	[73.2]	73.2	3594306	2.75432e+06	8.2745e+06	6340744			-1	-1	-1	-1	50.4:1 51.4:1 52.3:38082 53.3:176364 55.3:13705 56.3:20125 59.2:678371 60.3:49356 61.2:45123 62.3:1901 63.2:788 64.2:17140 66.3:67180 68.3:20842 70.2:270559 73.2:3594306 75.2:214023 77.2:318922 79.3:1 82:8461 82.5:11943 84.2:48216 86.2:430114 89.2:336563 93:10324 96.2:6212 100.1:538731 103.1:235910 105:27099 107:28062 109:8416 109.8:1393 110.9:16580 113:16910 115.1:77391 117.1:48373 123.4:272 123…
Pyrdinium, 1-methyl-, iodide	1965	12.351	1137.1	[79.2]	79.2	289930	469674	51996276	84231688			-1	-1	-1	-1	50.4:1 51.3:120090 52.2:179630 53.2:115062 54.3:59329 55.3:194004 56.1:199658 59.2:4329886 60.2:65920 61.2:486192 62.3:25466 63.4:16384 66.2:482747 68.1:34228 70.2:2033111 73.2:29647460 75.2:3277572 77.1:230512 79.2:289930 81.1:0 82.1:10665 84.1:296631 86.1:1787857 89.1:1835561 91.1:36971 92.3:17717 93.1:22007 94:19087 95.2:8703 96.1:13692 96.8:19056 100:3935613 103.1:824192 105:12574 107:36268 1…
Unknown	1966	12.3532	1137.19	[50.2]	51.3	114310	201394	559327	985438			-1	-1	-1	-1	51.3:114310 55.3:0 56.2:0 61.2:0 62.3:5274 68.2:11889 75.1:1 79.2:0 80.3:21552 84.1:1 86.1:0 93:6731 95.1:10195 97.2:5183 105:0 107:0 108.8:1 110.3:11295 111.3:13435 113:1 115:0 117.1:1 119:1 121.9:9851 122.5:6489 123.9:0 125.4:0 126.9:12431 127.5:8455 131:0 132.89999:1 134.8:36790 139.3:6277 140:1 143.2:24556 144:1 146.89999:1 152:22514 152.7:1968 153.8:3080 155.7:1 157:1 158:0 159.89999:0 162:1…
Unknown	1969	12.3598	1137.44	[102.2]	102.2	194807	161612	573169	475502			-1	-1	-1	-1	50.3:2687 51.2:24495 52.2:29148 54.2:7150 56.1:0 57.2:7907 60.2:0 62.3:6105 63.3:1 64:1 79.1:3143 81:5503 81.6:604 82.2:9144 93:5809 94:7586 96.4:0 101.2:67662 102.2:194807 107.8:1672 107.8:6325 109:1 111.2:1 121.2:20397 123.5:852 127.8:15598 128.39999:5376 137:6608 138.10001:3584 153.39999:776 164.2:4181 167.10001:1712 177:225 178.7:1 181.60001:1 184.7:1 185.89999:2036 186.39999:2210 195:643 197…
Unknown	1973	12.3687	1137.78	[155.7]	155.2	7741.27	10053.6	353387	458943			-1	-1	-1	-1	63.9:1457 67.2:32411 69:0 81.2:4130 87.1:2596 97.3:5471 102.1:2858 104.3:21716 104.3:21483 108.7:3241 111.9:13414 114.2:3190 118.1:12892 120.1:16977 120.7:3235 123.7:875 125.5:7789 127.5:136 128.10001:2672 129.2:0 139.8:0 144.10001:2408 155.2:7741 168.10001:1375 170.2:5875 172:606 181:1280 187.7:0 189:599 196.7:1148 197.8:179 197.8:382 200.7:945 202:486 206.60001:4017 217.10001:1433 218.2:29 222:…
Unknown	1977	12.3776	1138.12	[97.9]	97.9	20879.9	28700.7	923051	1.26879e+06			-1	-1	-1	-1	50.3:12539 51.3:19259 57.2:10837 58.2:34097 64.2:6309 65.2:6419 79.1:32752 80.2:0 81.1:2836 82:4250 85.2:14147 87.9:12273 89.9:12919 92:11579 94.1:2723 95.9:2294 97.9:20880 97.9:31802 101.1:68473 102:11814 105.9:5314 106.5:5370 107.6:4402 110.7:660 112:9770 121.5:3058 122.1:1 124.4:1100 125.7:473 126.2:7541 126.9:2991 134.89999:17563 139.10001:238 140.10001:5658 140.10001:7057 141.89999:325841 15…
Unknown	1979	12.382	1138.29	[78.1]	78.1	37431	33095	539938	477392			-1	-1	-1	-1	55.1:979 59.1:1 60.3:0 61.2:1 62.7:301 64.2:9952 65.2:19916 66.2:1 67.3:4963 68.1:2019 69.2:18674 70.1:0 73.1:0 75.1:0 76.1:47218 78.1:37431 81.1:21293 84.2:1 85.2:46723 86.2:1 87.2:0 89.2:0 91.1:1 95:4563 96.1:7587 96.1:10391 100:0 101.2:40360 102.9:1 105.3:1 114.2:23944 115.1:1 115.9:5784 117.2:1 118.2:2305 119:1 121:274 124.6:2741 124.6:2803 125.9:2749 126.5:120 128.7:9343 129.5:17324 131.1000…
Unknown	1980	12.3842	1138.38	[114.2]	114.1	24643.2	60183	879194	2147143			-1	-1	-1	-1	50.2:19162 62.3:6011 63.1:12383 65.1:5745 67.2:24379 69.2:40095 76.1:55974 78.1:29602 80.2:19564 81:11185 81:14256 85.2:15849 101.9:53760 105.8:16588 111.1:2516 111.9:38349 114.1:24643 119.7:27408 119.7:28950 123.8:454 124.9:7489 126:4529 126.8:6390 128.8:5366 137.89999:2527 139.89999:4632 141.89999:68498 151.10001:1831 152.89999:1440 154.8:50757 156:28243 157:1091 158:18863 159.10001:6348 161.2:…
butyrolactam NIST	1985	12.3953	1138.8	[141.9]	141.9	2.27803e+06	11167554	6066222	29738306	OC1=NCCC1	HNJBEVLQSNELDL-UHFFFAOYSA-N	728.881	753.67	473.684	783.532	52.3:52556 53.2:44472 54.3:24309 55.1:35305 56.2:32720 57.3:23031 58.1:19865 59.2:194120 60.4:33113 61.3:43296 62.2:7793 63.3:11524 66.1:13815 68.1:48713 69.1:45317 70.1:107341 73.1:1 75.1:545868 76.2:55009 77.1:55993 79.1:30881 80.2:37525 81:18846 81:21766 81.9:40831 84.1:49889 86.1:112465 87.1:8793 89.1:51851 91:8669 91.9:7274 93.1:17791 95.1:5031 96.2:8470 96.7:11176 97.2:13548 98.1:4575 100:5…
3-hydroxypropionic acid	2003	12.4352	1140.33	[146.9]	146.9	1.22762e+06	2.35255e+06	3.18815e+06	6109627	OCCC(O)=O	ALRHLSYJTWAHJZ-UHFFFAOYSA-N	829.168	782.719	600	847.011	50.3:35992 51.3:21803 56.9:18179 62.4:7203 64.2:1638 65.1:1889 66.2:103713 67.6:22962 67.6:27081 69.1:34072 71:17200 73.1:293538 76.1:16039 79.1:17748 81.1:23627 83:13803 85:54503 87.1:51702 88.2:18397 98.1:14916 101.1:63415 102.3:6819 105.9:4846 112:12155 113.9:8787 115.9:66705 117:18821 117.9:12047 120:16561 122:306 128.89999:41851 129.8:12366 132.89999:97860 133.89999:16673 135.7:2312 136.6000…
Unknown	2008	12.4462	1140.75	[258.2]	258.2	9598.82	14970.5	475044	740890			-1	-1	-1	-1	50.3:5026 51.3:11483 54.2:4925 58.1:14056 64.8:9081 69.3:10338 71.2:3277 77.9:26466 79.1:60290 80.3:18647 81:10390 81:11194 82.1:2789 82.1:3953 85.3:2048 88.2:3339 93:6732 94.2:5729 96:2208 96.9:369 97.7:170 101.1:1239 102.1:27357 104.1:3452 105.8:2065 109.5:2477 121.8:1933 122.5:2669 123.7:156 124.6:4371 129:5919 133.8:9068 150.8:9934 154.39999:911 156:9910 156.89999:18279 161:2405 164.39999:614…
Unknown	2022	12.4772	1141.94	[197.7]	198	4748.91	3614.38	465566	354341			-1	-1	-1	-1	53.2:25218 57.2:3665 63:0 64.1:1514 69.4:1 72.1:44112 80.1:10577 83.2:4523 87.3:1 92.7:4796 95.1:3796 96.1:5681 97.9:8603 98.8:13619 108.6:2482 108.6:22 110.5:3171 113:4008 122.1:1192 122.1:4033 128.60001:0 131:33757 132.2:7667 133.89999:2945 134.5:4402 135.3:1044 138.39999:1873 143.10001:11729 146.8:1 148.2:16352 148.89999:9520 149.7:5292 149.7:2442 150.89999:1899 154:824 156.39999:9059 160.7:23…
Unknown	2023	12.4794	1142.03	[72.2]	72.2	43849.3	33559.3	460778	352648			-1	-1	-1	-1	50.2:8500 51.3:291 52.2:5708 55.3:1 56.1:7800 57.2:4619 58.4:11803 59.1:1 61.1:710 65.1:838 66.1:2096 67:5358 68.3:5575 70.2:10172 71.1:6848 72.2:43849 73.1:5502 75.1:0 77.1:5823 79.1:5713 80.2:4233 81.1:0 82:1 84:1 85.3:4769 86.1:0 87:0 87.9:631 89.1:977 91.1:3517 92.1:7761 92.8:1550 96.8:800 99.9:1 100.9:4309 102:0 103.1:3834 104.1:6610 104.9:1 107.5:3289 109.6:2560 110.4:5598 110.4:3421 112.3:…
Unknown	2033	12.5016	1142.87	[190.8]	190.8	91224.7	215381	516200	1.21874e+06			-1	-1	-1	-1	50.2:6033 51.2:4693 55.1:3477 56.2:965 58.1:4385 61.9:620 63:1499 65.3:4679 67.1:506 67.9:232 67.9:7963 69.2:9597 70:11005 80.2:31287 82.4:1317 83:6908 84:3574 84.6:8559 85.6:3151 86.1:17852 86.7:5052 92:8772 108.9:2455 109.6:1643 110.2:1076 111:681 111.8:0 113:6342 114:77 114.9:4263 115.6:10705 117.3:9794 120.6:3234 122.7:1870 123.3:1 124.8:2228 125.8:0 127.9:5546 130.3:16757 131.2:2077 132.8:12…
Unknown	2040	12.5171	1143.47	[73.1]	73.1	364815	924322	1.67748e+06	4250194			-1	-1	-1	-1	53.2:19768 54.1:7933 55.2:4276 56.3:0 59.2:48277 61:6841 64.1:4848 65.9:6092 66.5:0 68.1:1400 70.9:13879 70.9:23520 73.1:364815 75.1:24570 77.1:5522 79.2:44501 80.3:37782 82.2:1350 85.1:15704 86.9:179 89.1:114288 91:3256 93.1:6570 93.8:4605 94.7:9017 94.7:13726 96.7:4225 100.1:47498 101.3:12982 101.9:10814 104:25298 105.9:5342 107:3806 116.9:15034 119:7011 124:2798 126.8:545 128.2:1392 128.2:7872…
Unknown	2041	12.5193	1143.55	[119]	119	72456.7	170378	1.30383e+06	3065882			-1	-1	-1	-1	52.2:12500 53.2:21838 54.2:6540 55.2:3242 56:0 58.1:1476 59.2:18080 60:10328 61.1:6808 64.1:4774 69.2:6509 70.1:21 73.1:356262 79.1:2303 80.3:34625 81.2:1 82.2:1326 83.1:4063 84.1:785 84.9:14306 86:10113 89.1:56800 90.9:539 92.4:7866 93.1:8191 93.9:6249 94.9:9961 94.9:10092 94.9:11661 97.3:0 100.1:53629 102.1:6821 104.1:35970 106:3882 109:2370 109.7:2384 110.3:4668 111.3:4743 113.1:8584 116.9:175…
Unknown	2044	12.5259	1143.81	[74.1]	74.1	49125.6	31495.6	419075	268679			-1	-1	-1	-1	50.2:11263 52.3:4687 53.3:11367 60.4:4375 61.9:142 63:2744 65:1344 66:2743 67.5:9100 70.1:4934 74.1:49126 75.1:8216 77.2:4773 83:2415 83.9:974 84.7:3630 86.1:5266 87.2:6155 89.1:4556 91:7704 94.7:5609 95.2:2344 100:847 101:14471 104:4959 107:3397 110.4:3358 111:148 114.9:1638 115.8:1756 116.4:19102 117:4637 118.9:2711 123.1:1876 124.9:871 126.1:170 126.1:1612 126.6:597 129.10001:3073 130.7:2023 1…
Unknown	2048	12.5348	1144.15	[265.8]	261.9	96.783	106.603	368265	405629			-1	-1	-1	-1	50.3:11905 51.3:12266 52.2:12569 58.1:7905 60.2:709 65:6781 66.2:6027 67.1:2263 69.1:1 70.2:1 78.1:45275 81.1:3451 85.2:753 90.7:7014 92.5:12596 97.8:1473 99:9836 100:7534 104:7710 104:8007 106.8:5708 106.8:3804 109:2040 110:1 111:1424 112:1428 112.8:5891 115.1:13218 121:3148 122.8:1975 123.8:165 125.3:2058 128.8:2753 136.89999:792 137.5:1372 138.3:155 140.89999:3072 144.2:2431 145:62 152.89999:1…
Unknown	2052	12.5436	1144.49	[266.7]	266.9	21860.7	53310.1	349062	851230			-1	-1	-1	-1	51.2:7384 53.2:3112 54.1:3222 55.2:468 56.2:1 61.4:1 61.4:8946 62.5:1734 63:4356 68.1:8839 77.1:10212 80.4:3669 81.1:2101 82.2:2302 83.8:1211 85.9:0 86.8:0 88:652 94.1:373 96.4:2885 97.5:27 105.2:6325 106.9:6352 108:2739 109.6:482 113.6:0 116:548 119.9:7098 121.8:3046 123.2:0 123.8:252 125:405 126.2:935 132.10001:11213 135.7:542 137.7:257 138.89999:601 139.5:1 150:1379 150.60001:1380 155.2:3278 1…
Unknown	2053	12.5458	1144.57	[354.5]	354.5	17842.9	36784.5	421835	869645			-1	-1	-1	-1	50.2:6284 52.2:1 57.2:3651 58.1:126 59.1:1 60.2:0 63.1:1845 64.1:1052 64.9:7592 66.1:0 67.3:676 70.3:1 71.3:7540 73.1:1 75.1:1 76.2:9540 77.1:8520 79.1:2107 82.3:2447 83.4:10477 84.8:5307 85.8:1 87.1:0 89.1:1 91.1:1 93.1:480 98:4688 99.2:7161 100:0 101.3:6770 103.9:1 105.7:8792 106.9:4552 109.7:516 110.9:399 111.5:0 114.3:4073 114.9:0 116.8:3921 118.9:1 121.2:4199 123:1106 126.6:489 128:903 129.1…
Unknown	2073	12.5901	1146.27	[122.6]	122.3	438.185	639.77	298764	436209			-1	-1	-1	-1	51.2:1 52.2:3838 54.1:6390 55.3:288 58.1:1354 59.1:2277 61.2:1 61.8:1211 63.2:2719 66.2:0 69.1:1046 73.1:0 75.1:0 76.2:32807 77.1:5020 79.2:3661 82.2:3546 82.8:6489 83.5:6993 84.1:4118 85.1:1738 87.3:3753 89.1:541 89.9:2816 92.9:0 95.1:3275 97.2:420 97.8:848 98.8:3842 99.9:1 101.3:5294 103.2:1690 103.8:5030 104.8:3301 105.8:2793 106.5:1374 107.1:209 108:1345 113.1:0 113.9:1561 114.7:1899 115.9:16…
Unknown	2076	12.5968	1146.52	[69.2]	69.2	39144.6	85706.9	410217	898167			-1	-1	-1	-1	53.1:8502 55.1:14465 56:3082 57.1:1187 61.9:580 65.2:1840 66.8:8828 67.3:14215 69.2:39145 72.1:7479 77.1:511 81:4908 82:172 85.5:2227 95.1:12523 96.9:2410 102:6728 102.6:3841 103.8:8535 105.8:4722 106.6:4660 107.3:316 108.9:17649 110:10208 111.1:20819 112:301 114.8:3523 118:2527 118.5:5361 121.4:3372 123.2:2708 123.9:4502 125.2:1821 136.8:15540 138.10001:11 138.10001:353 140.7:244 145.60001:1559 …
Unknown	2091	12.63	1147.8	[78]	78.1	43474.8	28769.9	235885	156099			-1	-1	-1	-1	52.2:8674 53.2:5338 53.9:4578 67.9:4525 70.3:2896 75.1:18197 76.1:1013 78.1:43475 79.1:1363 87.2:3483 87.2:437 87.8:749 89.8:556 95.8:3062 105.6:1352 106.2:872 107.3:378 107.9:1183 109.5:3004 114.3:1254 117:3621 122.9:4559 130.2:688 137.7:1600 138.60001:134 140:934 142.5:185 146.60001:6178 146.60001:3878 150.8:1182 152.60001:2327 154.8:369 163.10001:693 163.7:360 168.2:127 168.7:1912 175.89999:93…
Unknown	2102	12.6544	1148.73	[78.2]	78.2	68816.4	70412.5	315418	322734			-1	-1	-1	-1	51.2:1994 55.2:2665 56.3:3014 56.3:4155 57.2:0 58.2:334 60.2:315 61.7:744 61.7:1681 66:2209 68.1:5147 70.1:8553 71.1:2527 75.1:3544 78.2:68816 79.1:11200 80.2:986 81.8:667 83.8:5087 93.9:1704 93.9:5128 96:2323 97.3:777 98.9:5594 103.3:4326 103.8:1516 104.8:6444 106.2:1006 107.4:4335 109.4:2325 112.9:2335 114.8:168 119.8:3668 119.8:2390 121:670 124.2:1858 126:767 126.8:831 128.89999:1489 133.89999…
Unknown	2112	12.6765	1149.58	[151.9]	151.9	81337.1	211590	483624	1.2581e+06			-1	-1	-1	-1	52.2:12063 54.9:3441 56.2:3955 58.1:403 60.1:5219 61.3:6828 61.3:419 62.1:1520 63.1:4311 66.1:2692 67.1:3287 69.2:3000 70.3:11616 71:2428 73.1:8881 77.2:845 79.1:29778 81.9:3849 82.9:2611 84:1 85.9:0 87.2:1082 93:2362 95.9:735 95.9:7399 97.4:1947 99.1:1099 100.8:4150 108.7:2103 110:4193 111:0 112.1:2768 114.3:6618 116:3982 117:7719 118.8:1984 121:3791 121.9:8067 125:1206 125.9:1359 127.2:2512 127…
Unknown	2115	12.6831	1149.83	[175.8]	175.8	22669.6	50160.4	320691	709582			-1	-1	-1	-1	50.3:5232 51.2:9432 53.3:23626 56.2:1193 59.2:5165 61.3:1806 63.2:6017 65.1:225 65.8:6122 66.7:10125 69.2:4268 70.2:4346 71.1:1 79.2:17572 81:3754 81:3243 82.1:1535 83.9:6445 84.4:1876 87.3:3086 90:2401 91.7:3769 94.6:704 99.1:6792 100.9:2907 103.3:426 104.1:2674 105:4233 105.8:6676 107.3:1113 112.3:1828 118:1446 118.6:122 120:2622 121.4:597 122.4:2229 124.8:0 135:1 139.39999:1200 149.89999:1747 …
Unknown	2117	12.6876	1150	[166.7]	166.7	26357.9	67428.2	537921	1.3761e+06			-1	-1	-1	-1	50.2:9711 51.2:20003 54.2:6584 55.1:5312 57.5:2040 58.9:7402 65.4:7041 65.4:9970 67.1:4777 73.1:0 75.1:31233 77.1:6179 81:4412 84.2:1868 85.1:3757 86.2:0 86.2:1068 87.5:3560 89:20596 89.8:5225 90.4:5172 91:5472 93.1:1645 94.1:1 95.1:6350 96.2:555 100:1134 102.8:6934 102.8:8377 104:11901 104.9:5761 105.6:1425 106.7:1691 109:1824 111:6027 112.7:350 114.9:1 115.7:811 119:2346 120:5718 124.2:555 125.…
Unknown	2132	12.7208	1151.28	[174.8]	174.8	11564.8	10183.3	361774	318558			-1	-1	-1	-1	51.3:1157 53.1:6849 55.2:3285 56:84 57.1:844 59.1:886 60.3:2262 61.1:1239 63.9:5241 65.1:3864 65.8:9180 70.4:3168 75.1:8462 76.2:17732 77.1:6671 82.8:1 83.4:1023 84.1:1089 85.1:1262 86:10122 89:8411 91.1:7846 93:2029 93.6:5391 95:1 96:51 97.4:1902 97.4:4529 98.7:91 100:5092 101.3:5367 101.9:5491 102.5:370 103:7429 107.5:1998 112.5:676 113.3:3168 113.9:1953 114.6:1978 116.2:4012 116.2:10215 117.4:…
Unknown	2137	12.7319	1151.7	[174]	174	54969.5	136116	421180	1.04293e+06			-1	-1	-1	-1	50.3:700 52.2:4206 58:2974 61:1720 63:2688 66.2:1337 67.1:3658 68.1:2026 70.3:3685 71.1:4572 71.7:1781 74.2:20553 80.2:13873 81.8:3562 84.1:1399 86.1:3808 87.1:236 87.7:6059 89.1:11849 91.1:6564 92.2:1145 94.6:10142 98.7:7392 103.9:3993 105:992 105:780 107.3:4814 108.2:2035 109.1:2275 112.3:1964 112.9:1436 120.9:751 121.7:1822 127:4165 127.5:2642 128.89999:3144 134.7:6184 135.7:1079 141.39999:907…
Unknown	2142	12.7429	1152.12	[73.1]	73.1	95525.2	167961	791176	1391116			-1	-1	-1	-1	51.3:3506 52.2:26772 53.2:10814 55.2:3304 56.2:1 58.3:0 59.1:20104 60.4:3153 61.2:3694 64.2:3474 65.1:2395 65.7:12258 66.9:2728 66.9:4355 69.2:3836 70.1:2866 73.1:95525 75.1:24216 76.1:34699 77.2:6358 81.1:2681 83:2238 83.9:7850 84.9:4667 86.1:10186 87:833 89.1:38431 90.7:4930 93.1:2081 94.2:5740 95:3711 97.8:1412 100:47487 101.3:8725 102:11449 103.3:12734 104:2611 105:2393 105.8:3597 106.6:288 1…
Unknown	2150	12.7607	1152.8	[83.2]	83.2	48994.7	112936	433891	1000146			-1	-1	-1	-1	52.2:3961 53.3:10045 54.2:742 57.1:2437 57.1:4036 64.9:1939 65.9:317 66.5:84 68.2:1560 70.1:9586 71.2:601 75.1:3541 79.1:5210 80.1:12424 83.2:48995 84.2:1793 86:15226 89.1:4010 92.3:7126 97.3:693 101.7:58 103:5414 108.7:1940 110.8:574 113.5:3136 115:1339 115.9:1396 117.6:2539 118.7:1852 120.9:1846 124.9:996 126.3:1604 127.7:2549 127.7:3009 128.7:3550 129.7:310 130.5:1930 130.5:1074 131.89999:5789…
Unknown	2163	12.7894	1153.91	[129.8]	129.8	23561.6	50052.1	509307	1.08193e+06			-1	-1	-1	-1	52.2:6425 54:8887 54:6808 62.4:566 63.1:1656 64:2642 65:1241 65.7:1386 66.5:1 67.1:2581 68.2:635 71.5:7137 76.3:7013 78.1:14817 80.9:2220 83.1:243 84:733 85.2:1196 87:3705 90.9:2953 94.7:1748 97.4:1470 99.2:12364 100.9:4187 101.5:3151 105.1:3167 111.3:3125 113.3:1637 115.6:3418 117.9:12308 117.9:11207 127.2:2398 127.8:493 129.8:23562 130.39999:5185 132:15025 134:2610 135.5:3163 138:1055 139.3:0 1…
Unknown	2170	12.8049	1154.5	[210.6]	210.8	15901.6	37698.8	933916	2.21408e+06			-1	-1	-1	-1	52.3:21297 53.2:3059 54.1:6575 55.2:890 56.3:1022 60.4:3581 60.4:5200 64.4:5920 65.1:2590 67.2:1 68.1:12045 70.1:5218 71.2:1701 75.1:10688 79.1:9081 80.3:30753 81.1:5820 81.9:1354 82.9:0 84.3:1619 85.3:6653 86.1:466 87.8:2479 89.1:1502 93.1:4175 94.1:4163 95.9:7200 96.9:0 97.7:5030 98.9:15494 103.3:4650 103.9:288 107:2292 110.8:2141 117.5:5546 118.7:6565 121.3:4017 123.2:941 123.8:2027 125.8:1158…
Unknown	2171	12.8072	1154.59	[206.9]	206.8	66779.9	177832	1.12165e+06	2.98691e+06			-1	-1	-1	-1	50.3:4307 51.3:860 52.2:24873 53.3:15587 54.5:2861 57:4046 58.2:6806 60.2:2919 61.1:13006 65.5:1519 65.5:2060 67:1 68.1:11451 71.3:1 73.1:251151 76.2:20330 79.1:13500 80.1:7773 83.1:0 85.1:4695 87.1:1537 90.1:1 91:2354 94:4720 95.1:2022 96:2165 97.2:37 98:1 104.1:4152 105:2426 108.1:1238 110.2:2140 113:1700 113.8:1 115.2:3442 117:1 117.9:9106 120:17242 122.9:2308 123.5:338 124.5:485 126.3:1611 12…
Unknown	2172	12.8094	1154.67	[73.1]	73.1	252391	611838	1148442	2.78402e+06			-1	-1	-1	-1	51.3:5953 52.2:26922 53.3:16572 55.2:16207 56:1045 56:3961 59.1:6496 60.3:5334 61.1:2327 61.9:960 64.9:0 66.2:972 67.4:5833 68.1:11243 69.2:21276 70.2:6724 70.8:6079 73.1:252391 75.1:15934 77.1:17360 80.1:23776 83.9:1765 84.9:6846 86.3:1831 87.8:559 88.9:6748 88.9:3376 91.1:2598 93.1:194 94:4618 96.1:3777 98:0 100:33879 101.4:7284 102.6:6295 103.2:6938 106.2:5091 108.1:2448 110:1193 111.1:1204 11…
Unknown	2174	12.8138	1154.84	[77.1]	77.1	91083.7	240059	832318	2193647			-1	-1	-1	-1	52.2:21008 53.2:19859 54.2:3390 58.5:14691 60.1:5767 60.1:6044 63.2:1907 63.8:758 66:1327 67.2:3696 77.1:91084 79.1:27506 80.9:5295 83.6:6049 87.3:3928 88:2335 90.9:2124 92.9:3709 94.8:4588 96.6:2763 101.9:4460 103:5546 105.9:3230 109.9:1427 112:0 115:4517 118.3:1593 118.9:2050 119.9:24546 121.1:1422 122.5:3456 123.9:1825 126.8:3438 128.3:690 129.89999:9322 131.5:9397 132:24680 132.8:3339 134.100…
Unknown	2176	12.8182	1155.01	[100]	100	40105.6	89479	676703	1509781			-1	-1	-1	-1	51.2:10641 52.3:0 53.3:18168 55:3732 57.1:3404 57.1:8284 58.2:9566 60.2:4374 61.1:785 62:0 65.1:2228 66.2:1276 67.2:4042 68.1:4162 69.3:9989 70.3:7285 71.4:5101 71.4:4199 73.1:8606 74.2:21242 75.1:16764 77.1:899 79.2:26291 80.2:24824 82.3:3058 85.9:1835 89.4:472 92.4:11564 93.8:4957 97.1:2160 98:4740 98.8:7023 100:40106 101.1:6081 101.9:1 103:2425 104.8:3999 106.9:1200 110:1206 111:0 111.7:491 11…
Unknown	2179	12.8249	1155.27	[241.6]	241.6	29999.9	64989.1	870313	1.88536e+06			-1	-1	-1	-1	50.3:3721 51.3:13123 52.2:0 54.6:1853 56.1:0 57:4350 61.9:5707 63.2:2318 64.8:793 64.8:1699 69.1:17092 70.1:6622 71.1:4369 73.1:94458 75.1:2473 76.1:56999 81.2:6703 83:2662 83.7:6618 83.7:3535 86.1:0 87.2:1619 88.8:5909 88.8:7091 90:3170 92.3:6671 94.1:8762 96:787 100:17008 102.4:10471 103.1:6 104:3772 106.9:1 107.6:3563 107.6:4325 108.8:2065 111.9:5498 116.2:4890 116.2:6748 117.2:994 118.5:4399 …
Unknown	2180	12.8271	1155.35	[50.3]	50.3	14538.4	13079.6	346788	311993			-1	-1	-1	-1	50.3:14538 55.2:967 57.1:3442 62.1:1634 65.8:638 67.2:2137 68:0 70.1:6746 71:5054 75.1:1312 76.1:32396 81.2:5480 82:2522 82.8:1593 84.1:1012 85.4:2405 85.4:4791 85.8:240 87.7:1734 88.9:4280 89.9:2718 91.1:326 91.7:5330 92.2:5221 93.8:904 94.3:3478 95:2849 97.3:719 97.8:1697 98.3:1730 100:1190 101.2:6680 102.1:4730 103.9:4801 104.9:1327 104.9:8134 106:3302 107.1:1 107.6:983 108.7:3516 111.9:9106 1…
Unknown	2186	12.8404	1155.86	[111.6]	111.9	6636.88	10657.7	264312	424440			-1	-1	-1	-1	51.2:13602 53.2:18866 56.3:5787 58.1:857 58.1:6212 60.1:2405 61.3:1808 61.3:2279 63:4635 64:154 65.3:1565 76.1:0 83.1:1245 85.9:742 88.6:10111 89.2:0 90.1:2563 91.1:1626 92.1:1156 92.8:1525 95.2:1769 101.8:0 103:6618 106.9:1095 107.9:2594 109:1445 109.9:615 111.9:6637 112.5:3549 113.6:512 115.9:2000 120:1924 120:14029 122.1:1731 126.3:945 134.8:3098 135.8:1883 138.2:693 141.60001:706 145.2:1 148.…
Unknown	2189	12.847	1156.11	[146.9]	146.9	67723.7	132675	358198	701735			-1	-1	-1	-1	51.2:5557 52.2:4287 54.4:5285 55.3:1512 56:0 57.1:1620 61.9:81 63.1:806 64:3209 66.1:3056 67.3:8367 75.1:13900 81.1:7517 81.8:4954 82.5:1 84.2:134 85:1769 87.2:1331 88:4644 88.5:6707 90:1404 91.7:2085 94.1:51 96.8:2360 97.8:1026 98.9:11292 99.5:3319 100.9:2734 100.9:1154 105:842 106.2:355 106.8:939 109.2:1940 112:1281 113.3:1976 116.9:15388 121.3:1647 122.9:1779 127:2983 128.89999:7260 137.60001:…
Unknown	2198	12.8669	1156.88	[50.3]	50.3	10928.6	9851.98	257620	232240			-1	-1	-1	-1	50.3:10929 53.2:1463 54.9:523 56.1:392 57:825 61:1746 65.4:574 66.9:806 69.2:792 70.2:4180 71.3:16912 76.1:5154 78.1:50560 80.2:1635 82.1:368 88.9:3375 90.9:1396 93:2075 100.9:3345 105.1:1 106.8:1129 108:2201 108.7:974 109.6:519 112.2:1042 113.3:1200 118:4066 118.8:1424 120.2:2771 121.6:3468 127:274 131:1069 132.8:211 135.89999:1997 138.8:1600 139.5:2151 139.5:2929 140.60001:1460 142.10001:1764 1…
Unknown	2203	12.878	1157.3	[99.4,70.1]	99.4	39846.6	80128.2	460123	925268			-1	-1	-1	-1	51.2:4366 52.2:7096 54.2:7163 56.4:8186 57.2:0 59.2:1626 61.1:2645 67.7:1 68.3:1 69.2:10379 70.2:21321 71.1:7455 72.2:19175 74.1:10121 75.1:6103 76.2:16880 79.1:788 80.2:4888 81.2:4002 82.6:4272 82.6:2964 84:7811 85.3:3979 86:436 89:1411 94:1467 96.1:7688 97.7:2461 99.4:39847 99.4:37762 100.8:3436 104.1:1305 104.1:2951 104.6:3193 106.1:0 111:1240 113.7:2257 116.1:3657 116.9:3291 122.9:782 124:339…
Unknown	2206	12.8847	1157.56	[72.2]	72.2	32982.5	41329.7	499633	626081			-1	-1	-1	-1	50.3:395 52.2:0 53.2:3903 55.2:1214 56.1:8320 56.9:2541 58.4:5592 59.2:6933 60.3:2170 61.2:2932 62.3:2866 63.9:2688 66.1:693 67:9726 69.1:4765 70:20008 72.2:32982 73.1:5308 75.1:16403 77.1:2578 79.1:15980 80.2:2988 82.7:6021 83.8:1 84.4:340 84.4:4865 86.9:204 88.8:5245 88.8:2302 90:3105 90.9:1971 91.9:6922 92.5:21826 93:2730 95:0 95.9:1274 97:914 98.3:12668 98.3:12524 99:10819 99.7:8902 99.7:1392…
Unknown	2207	12.8869	1157.64	[355.7]	355.7	5030.67	3756.5	427939	319551			-1	-1	-1	-1	51.3:3916 54:3489 59:4859 62.1:475 63.1:1651 64.9:5140 64.9:545 66.8:3175 67.3:10336 72.2:52036 73.1:6572 75.1:13427 76.1:18956 80.2:11153 84.2:741 85.8:2035 92.1:11796 93:3889 98.2:10970 99.3:7156 100:9529 101.8:1820 102.8:2462 105.9:5350 107:2831 108:1291 110.1:8266 111.7:350 112.7:1609 116:591 120:1278 123.8:1851 126.7:1492 128:1683 129.5:3223 133.7:2715 133.7:2130 136.89999:2372 139.60001:152…
Unknown	2218	12.9112	1158.58	[285.4]	285.4	5508.15	7392.58	295215	396213			-1	-1	-1	-1	51.2:3559 52.2:2694 53.2:78 59:2303 63.1:973 64.8:2618 66.1:1653 68:3228 77.2:6778 79.1:18822 81.6:2311 86.1:854 86.1:2568 91.2:5501 92:2606 93.2:5250 93.2:1602 94.1:4868 100.1:2287 100.1:1935 102.7:4679 103.2:7741 103.9:4477 106:2848 107.8:495 110.1:203 111:2136 112.6:532 113.9:1175 122:1384 123.2:2949 124:1 124.9:390 128:2488 130.8:0 130.8:5361 134.39999:81 135.7:2348 135.7:1572 137.7:92 139.8:…
Unknown	2222	12.9201	1158.91	[177.5]	177.9	9603.41	16829.6	231568	405814			-1	-1	-1	-1	52.3:1888 54.4:3066 55.4:180 58.1:3405 61.2:1 63.9:3653 66:1130 69.1:3959 71.3:346 76.1:1305 77.2:562 81.4:3297 82.2:1627 83:2579 83.5:2932 85.1:2594 88:2360 88.8:747 89.4:0 92.1:5451 94.1:189 95:2997 97.9:3190 98.6:1303 103.9:154 105.4:1 106.7:1984 107.4:1445 109.5:1562 110.1:2668 111.9:207 112.6:541 118:76 118.9:657 121:1699 121.9:1 123.4:331 126.9:1262 127.7:374 128.60001:1 130.60001:1809 135:…
Unknown	2223	12.9223	1159	[204.7]	204.5	12932	25001.6	306574	592705			-1	-1	-1	-1	50.3:674 51.3:1376 53.3:6762 55.2:3452 56.9:700 58.2:5450 58.2:1051 60.1:428 63.1:340 64.9:2603 67.1:717 67.9:854 73.1:3983 75.1:7592 79.1:0 82.7:7432 84.7:1872 85.3:2918 85.9:4672 87.1:1065 91.3:2096 92.9:215 94.3:3880 94.9:1784 97.2:0 100:551 101:2378 104.1:2972 105:0 105.9:1 107.6:1514 111.1:55 112.8:1998 114.4:328 115.9:1287 116.8:1178 118.9:1536 120.1:723 126.7:2715 127.7:198 130.60001:5712 …
Unknown	2245	12.971	1160.87	[137]	137	111246	269164	507539	1.22801e+06			-1	-1	-1	-1	50.2:1808 53.3:5453 54.9:6588 56.1:1813 57.2:12876 59.9:3770 63.1:1066 65.2:3189 67.1:1803 69.1:778 77.2:8983 81.1:30356 83.2:3904 83.8:5859 85.9:628 85.9:874 91:20272 91.8:2364 92.9:4249 95.1:68152 101:379 104.9:7099 105.7:4925 107:16136 109:19256 113.4:1652 114.8:2448 118.9:1702 119.7:1708 120.3:1372 121:10718 121.7:4492 122.9:4136 123.8:1231 125:1017 128.39999:0 129.3:2874 133.8:18 134.7:1089 …
Unknown	2257	12.9976	1161.88	[151.7]	151.8	13212.3	24780.8	242746	455290			-1	-1	-1	-1	51.2:1404 54:6186 58.1:338 61.9:73 63:710 64.1:1303 65.1:2808 69.2:661 70.1:3194 71.2:5255 73.9:20151 76.2:8346 79.1:16152 80.4:26735 80.4:1563 86.8:2559 88.8:362 91.9:317 93.7:5396 99.1:3745 103.9:1597 105.9:373 106.9:262 109.5:944 111.2:4301 113.9:1166 115.6:2375 117.7:512 119.9:761 120.9:1006 124.2:1436 128.10001:401 131.7:966 134.10001:1253 138.3:1371 146.3:6090 151.3:1568 151.8:13212 153:171…
Unknown	2274	13.0352	1163.33	[281.5]	281.5	22675.5	22090.7	233727	227699			-1	-1	-1	-1	50.3:14042 53.2:1823 54.1:4815 55.2:2028 56.1:1440 70.1:1797 72:8038 76.2:7111 80.2:1421 80.9:464 82.1:515 83.8:3309 92.2:4202 93.1:1061 95.1:5668 98.2:277 102.3:3436 107.2:443 114.5:4779 115.7:2081 122.5:518 127.2:605 130:4638 132:2179 136.5:2360 141.10001:1595 147.8:9363 152.10001:1084 153.3:1096 157.7:612 159.39999:1643 169.60001:2144 170.10001:687 173:330 183.39999:810 184.39999:80 188:535 19…
Unknown	2278	13.0441	1163.67	[283.8]	283.8	13806.5	10218.3	296738	219619			-1	-1	-1	-1	51.2:7159 52.3:1234 54.9:3053 57.1:0 59.1:0 59.7:1 61.2:0 62.9:2895 65.2:4774 65.9:0 67.1:1370 67.9:0 70.8:0 73.1:1 74.2:6625 75.2:0 76.3:32860 80.2:12303 82.1:3210 83.1:1 84.8:0 84.8:0 87.3:1 89.2:311 90:1172 91.1:2015 93.2:1722 95.1:4458 96:0 97.1:0 97.8:509 99.9:5571 99.9:6135 101.1:1 102.9:0 103.9:2456 104.8:1174 106.3:0 106.9:142 108.4:547 111.2:0 112.7:1340 113.5:1134 114.1:1136 115.1:1 116…
Unknown	2280	13.0485	1163.84	[265.6]	265.6	10328.2	10356.1	775942	778039			-1	-1	-1	-1	50.2:1062 53.2:13920 54.2:562 56.6:615 56.6:2721 58.1:6759 60:5776 61.2:1712 62.3:1473 63.6:3265 66.1:10926 67.2:6281 68:3615 69.2:9265 71:4781 73.1:41790 76.1:8341 78:61604 79.1:12454 81:692 82:391 82.9:3369 84.9:3241 86.1:5623 87.4:2609 90.9:2454 93:2642 97.9:4417 98.5:2811 100:697 101.1:1407 103:5961 103:4477 104.8:3287 105.9:143 109.5:6136 110.2:8664 111.5:2958 111.5:4653 113.9:73 115:3599 11…
Unknown	2287	13.064	1164.43	[148.7]	148.7	69173.3	48745.2	1.26529e+06	891629			-1	-1	-1	-1	53.3:7577 54.1:1112 56.1:1603 57.1:2485 58.2:2846 59.2:15082 61.1:3425 62.2:3077 64.6:295 66.2:7829 68.1:8203 69.2:3412 71.3:5912 73.1:217592 77.1:1788 79.2:11919 82.2:786 82.9:1454 87.2:4816 87.9:1746 89:1168 92.9:3266 94.3:4294 95.9:5531 97.2:262 99:8380 103:3500 104:3958 104.9:6112 107.1:1945 109.1:551 109.1:3252 110:1853 111.1:3432 112.8:2718 114.5:1722 118.8:2932 120:6924 120.8:1425 121.8:97…
Unknown	2289	13.0684	1164.6	[252.6]	252.6	25009.6	52927.5	1.03923e+06	2.19932e+06			-1	-1	-1	-1	50.2:6723 51.3:9431 52.2:3647 53.3:15446 54.2:2476 56.3:4707 56.3:16546 58.2:9080 61:5481 65.2:1782 70.3:7216 71.1:13733 75.1:70793 80.3:9436 81.1:12499 81.9:4160 84:1776 85.3:7909 88.3:2325 89.2:214 90.1:3172 94.1:6910 95:3119 95.8:9365 97.2:5859 98.7:7476 103:34766 104.2:1243 105:15941 106:3945 107:2390 107.9:3650 109.9:3602 110.7:3406 110.7:15244 112.8:7326 117:30183 118.2:7074 119:2760 120.1:…
Pentasiloxane, dodecamethyl-	2292	13.0751	1164.86	[280.8]	280.8	4628200	9249750	15722053	31421516			-1	-1	-1	-1	50.2:5202 54.2:1 56.9:2880 58.2:8981 59.2:117373 65.1:839 66.2:9070 73.1:3360532 75.1:11838 77.1:18697 79.2:27891 80.9:16621 82:2754 83.1:10392 84:2059 85.8:1396 87.2:26399 88.9:10546 90.9:2612 92.1:7592 93.1:7588 94.1:7423 94.8:7947 96.2:23354 97:3149 103:36810 104:6175 104.7:15125 108.1:4773 110.6:13803 111.9:8258 113.7:362 114.9:17035 115.5:11352 117:64648 119:28196 124.9:23621 127.9:2409 127.…
Unknown	2294	13.0795	1165.03	[188.7]	188.7	60917.7	130542	2.573e+06	5513723			-1	-1	-1	-1	51.2:2625 52.2:7308 55.1:13927 56:6178 57.3:10269 61.2:7469 66.2:22612 67.1:8355 67.9:7746 69.2:6156 71.1:10549 73.1:456854 74.2:58474 75.1:53140 79.2:31455 82.9:4687 84.9:20139 86:5266 87.1:2169 89:7184 90.3:3007 91.1:23 91.1:6764 93:9496 93.7:7227 94.5:2695 95.2:1918 96.1:17960 96.8:4897 97.5:3370 98.1:713 99.6:2643 100.1:5493 101.1:3640 103.8:4707 109:487 109.9:6517 112:5937 112.6:8626 115:133…
Unknown	2296	13.0839	1165.19	[148.8]	148.8	163310	130054	797114	634790			-1	-1	-1	-1	52.2:11144 53.2:17818 54.5:2220 55:9419 55:7572 56.3:6886 57.2:900 59.2:7672 61.1:3336 62.1:3274 63.1:3498 64.8:3599 65.3:5858 68.2:5369 69.2:2121 70.2:11837 73.1:79694 75.2:32982 77.1:10213 79.1:15434 80.2:20756 81.2:4446 82:3098 83.1:978 84:2655 85:1406 87.1:938 88:7236 93:6081 93.9:5214 94.9:7572 94.9:6343 97.5:3718 97.5:2931 99:2862 99.9:7438 101.2:8502 101.2:3796 105:27 105:4059 106.1:1414 1…
Unknown	2301	13.095	1165.62	[186.7]	186.9	30479.6	66720.2	424959	930242			-1	-1	-1	-1	50.2:1184 51.3:7193 63.5:6816 64.2:2257 71.4:3818 76.3:30223 80.2:13744 81:8514 85.2:2260 90.1:1614 91.3:198 96.9:3193 96.9:1214 110.3:3161 113.1:7529 117.1:2983 117.9:3511 118.8:605 121.2:1787 124:462 128.89999:11912 130.89999:3576 140:2318 141.39999:3462 142.5:555 143.10001:3439 145.10001:3439 149.89999:2163 154.2:1892 156.60001:58 162.2:840 164.2:862 167.8:2225 179.8:631 186.89999:30480 191.7:…
Unknown	2320	13.1371	1167.23	[151.1]	151.1	18257.6	36300.9	410113	815413			-1	-1	-1	-1	50.2:8033 52.2:2582 53.2:1306 53.9:6857 59.2:10957 62:1760 65:4270 69.2:2609 76:16795 76:16795 77:9891 79.1:15080 80.3:10721 90.9:760 93.1:8998 100.1:7959 101.9:1707 103.9:1723 107:1575 116:4491 123.7:336 129.3:5036 131.8:3292 133:18618 137.2:1696 138.3:777 139.2:1206 141.39999:866 143.10001:5364 147.89999:7187 150.60001:15777 151.10001:18258 151.7:5306 152.2:3879 155:8991 162.89999:1793 167.8:38…
Unknown	2325	13.1481	1167.66	[345.6]	345.7	3075.52	3548.67	598352	690405			-1	-1	-1	-1	50.2:1656 51.3:11837 53.3:4253 55:2138 59.2:7991 62.6:672 63.1:2748 63.9:2502 66.1:2220 70.4:1233 71.2:1323 73:100247 75.1:28954 77.2:3706 82.9:2176 84.9:3247 86.2:1160 87.2:1990 87.8:5539 89.2:1060 89.9:2929 92.6:1267 93.1:4975 97.5:4290 99.3:7017 99.9:2380 101.4:8006 102:1445 102.9:9408 104.8:3586 105.5:1293 106.9:1485 108.8:196 110.8:661 113.2:1428 114.3:2089 116.6:7471 117.3:775 119.1:7071 11…
Unknown	2337	13.1747	1168.67	[188]	188	91453.3	215885	890383	2101843			-1	-1	-1	-1	50.2:6083 51.3:10910 52.2:12157 54.4:1207 55.2:9536 56:38212 57.2:198 58:24760 59.2:8384 61.2:5489 62.1:2760 63.1:4674 64.1:2098 66.1:6175 66.9:3610 69.1:6000 69.8:43924 69.8:18973 77.1:8239 78.1:38459 81.1:12936 81.9:8445 84:14560 86.2:20669 86.2:17970 88.9:12700 90.6:685 90.6:6902 91.7:1 94.4:10852 95.1:15187 96.2:1530 98:3799 100.1:28691 102:16998 104.8:1630 108.1:5018 108.1:1719 110:945 111.7…
N-Methyl-DL-Alanine; GC-EI-TOF; MS; 2 TMS; BP	2340	13.1814	1168.93	[73.1]	73.1	776832	1.75996e+06	2.44262e+06	5.5339e+06	CNC(C)C(O)=O	GDFAOVXKHJXLEI-UHFFFAOYNA-N	531.138	762.723	875	784.919	53.2:13724 54.1:10828 56.1:21314 56.1:43423 57.3:23604 58.5:1228 59.1:15377 59.9:4664 60.4:10796 61.1:27871 65.1:4049 66.1:3171 67:8415 67.5:8686 69.2:9719 70:7379 73.1:776832 74.1:30185 75.2:185570 76.1:2329 77.2:16025 79.1:31870 80.2:17244 82.3:13444 82.3:10797 83:6630 84.6:9064 86.2:37982 86.9:21718 88.3:6609 89:13587 90.7:6870 93:12025 96.8:5385 96.8:4282 101.1:6098 102.2:19583 103:8058 103.7…
Unknown	2344	13.1902	1169.27	[214.7]	214.9	15854.4	32106.7	1.04359e+06	2.11337e+06			-1	-1	-1	-1	50.2:9262 52.3:9434 55.1:12951 56.2:2481 56.8:35425 56.8:14258 58.1:28591 58.1:35949 59.1:17666 62.3:3915 63:4210 64.2:1 66.6:1749 67.9:4701 70.3:5740 70.3:9102 71.1:9691 73.1:71455 76.1:1907 81.1:543 82.4:7715 84:15156 86.1:32079 87:16615 89.1:10788 91:2209 94.1:5230 95:4478 96.3:3058 100:24066 108.9:5682 110.1:1415 111.1:3789 111.7:1753 112.9:3175 117:16559 118:7972 120:2889 120.9:1885 121.9:16…
Unknown	2387	13.2854	1172.92	[82.7]	83.1	6555.58	4748.21	405480	293690			-1	-1	-1	-1	50.2:1572 51.2:7457 53.1:7146 59.1:655 63.2:31 64.1:4028 65.2:4655 66:1572 68:2783 69.2:4254 70:1358 73.1:19271 75.1:0 76.2:10242 77.1:3261 83.1:6556 83.9:641 85.1:1 87.2:4598 88:1453 88.9:5835 90.5:2983 91.1:4269 93.9:3625 95:2667 98.1:13572 99:6287 100:1214 101.5:1718 102.9:6304 103.7:4791 104.8:3443 105.8:1258 106.9:492 108.3:3528 113.2:1 114.5:1502 115.1:1450 116:1 118:521 118.7:190 120.1:643…
Unknown	2394	13.3009	1173.51	[110.1]	110.1	389111	1.1102e+06	1.40678e+06	4013805			-1	-1	-1	-1	50.3:8347 52.2:50523 53.1:15568 55.2:16464 57.2:1486 59.2:5231 62.1:2617 63.3:4595 64.1:8756 66.2:23879 67.2:130986 69.1:7314 71:7712 79.1:143590 81.2:9562 82.1:26026 86.1:17813 93.1:69674 94:21332 95.9:10122 98.3:62282 99:5362 101.6:1483 102.4:5039 102.9:7157 103.9:5361 110.1:389111 111.2:21711 113.8:2157 117:5430 119.9:906 124.2:7253 125.1:69718 126.6:4378 127.3:467 128:1237 129.7:4537 131.8:11…
Unknown	2395	13.3032	1173.6	[65.2]	65.1	22846.4	37791.7	780993	1.29189e+06			-1	-1	-1	-1	50.3:4425 52.2:48865 53.2:1149 54.3:1361 55.1:852 56:3127 62.4:374 63:2210 65.1:22846 67.2:1 68.2:1568 69.1:5556 71.2:1182 71.9:4600 73.1:17347 75.2:4848 77.1:0 79.1:17875 82.2:447 84.2:353 84.9:3128 86.2:1 88.3:2657 88.9:404 93.1:12159 95.5:678 99.1:7733 100.6:2057 101.6:1882 102.8:2703 104.1:5757 105.1:780 105.9:1255 106.9:3147 110.1:362794 114.1:2163 115.8:0 116.9:3820 118.5:1379 120.1:3043 12…
Unknown	2396	13.3054	1173.68	[67.2]	67.2	119504	298690	1.19884e+06	2.99641e+06			-1	-1	-1	-1	51.3:30430 52.3:52117 53.3:49645 54.2:32218 55.2:4491 56.3:8697 59:3049 61.2:2503 62.5:7124 64:14926 65:29422 66.2:72555 67.2:119504 68.2:55182 69.2:1809 73.1:16668 75.1:6965 77.2:1 79.1:54879 80.1:61609 82.1:36571 83.2:23333 85:0 87.2:1910 87.9:3734 89:3725 91.2:2116 91.9:6709 93.1:31463 94:41632 97.1:7204 98:35542 100.3:8806 101:2522 101.9:3301 104.1:7366 104.1:9897 104.9:4634 108.2:1811 110:71…
Unknown	2401	13.3164	1174.11	[86.1]	86.1	25548.8	42029.2	300989	495145			-1	-1	-1	-1	51.3:15257 56.3:800 56.3:4792 56.8:3019 56.8:1386 58.1:12773 59.9:2823 60.5:7495 62.4:533 63.4:3001 63.4:4464 64.1:237 67.1:1640 70.1:6047 82.6:2241 82.6:8701 84.5:8228 86.1:25549 87.4:603 90.3:1042 94.9:6837 96:1989 96:13325 98.9:2985 100:1745 100.9:509 107.1:914 112.2:2520 112.7:2434 113.8:821 115.1:2011 118.1:3832 122:1111 122.6:277 127.7:1649 129.2:2855 132.2:3216 135.5:609 140.7:644 144.6000…
Unknown	2420	13.3585	1175.72	[192.2]	192.2	14594.5	27977.2	676558	1.29694e+06			-1	-1	-1	-1	50.2:1228 51.3:11970 53.1:10917 55.1:3011 56.1:1253 56.8:3510 57.3:5137 58:10161 60.4:6838 61:344 63.2:1514 66.1:0 67.3:14336 69.1:19860 69.1:19860 70.3:4835 71.2:8608 73.1:0 75.1:0 77.1:0 79.1:8053 80.1:32525 80.9:5936 82.1:2775 83.8:6298 84.6:3490 85.9:44543 87.2:2119 88.9:211 90.1:1892 90.9:2940 91.6:2231 93.1:7753 94.1:4067 94.9:1 95.9:2933 97.2:1772 98.2:8231 100:2844 102.1:1293 103.2:15532 …
Unknown	2421	13.3607	1175.8	[101.9]	102	87099.2	178765	557045	1.1433e+06			-1	-1	-1	-1	50.2:1 51.3:8173 52.2:3992 59.1:22131 60:2854 62:2744 62.6:4326 65.1:4916 69.2:19302 71.2:7618 71.8:8375 80.2:31662 86.2:44506 95:0 102:87099 105.8:3194 111.2:297 114.9:4512 128:4436 128.60001:2336 129.89999:19489 132.2:1738 133.89999:738 135.7:585 140.89999:1 148.8:1 149.39999:1739 153.7:63 158.10001:1272 159.89999:3715 161.89999:213 165:1 165.89999:1 173.5:15649 181.5:129 184:564 188.2:511 192.…
Unknown	2423	13.3651	1175.97	[77.1]	77.1	4516.01	5197.49	426550	490917			-1	-1	-1	-1	51.3:2570 53.3:16818 54.2:3752 55.1:0 56.1:155 58:7464 59.2:9287 61.1:0 63:3694 63.7:4120 64.2:5898 65:3807 66:7389 67.3:1 70.1:888 71:0 74:22043 75.1:1 77.1:4516 79.1:7346 84.3:3619 85:1511 86.2:8426 87.9:0 89.2:0 90.5:7008 92.9:4796 94.1:0 98:1 99.9:445 100.9:1599 102.1:3617 103.3:5257 105.7:6665 106.4:2133 110.1:1 111:2709 111.9:688 116.1:1 117.8:5361 118.6:0 119.1:5511 120.1:17257 121.6:401 1…
Unknown	2425	13.3696	1176.14	[150.8]	150.9	0.665283	0.569313	401699	343753			-1	-1	-1	-1	50.3:479 52.2:11071 53.2:2530 54:4314 55.1:1 56.1:4701 57.4:1593 59.2:6999 61.2:0 62.1:2495 63.2:2782 64:4368 65:1186 66.2:2297 67.1:1 68:1 69.3:2781 73.1:0 75.1:1 76:3020 77.1:16884 79.2:10550 81.3:2450 82.3:280 83.1:1174 84:726 84.9:3363 86.2:7314 87.2:2166 92.1:1596 93.1:4423 94:5030 94.7:0 95.3:0 96.3:262 97.1:6773 98.1:3763 100.1:1 101:4931 104:3702 105:0 107.2:0 110.1:1 111.3:971 112.2:556 …
Unknown	2432	13.385	1176.74	[266.9]	267.1	20609.1	38801.5	422986	796370			-1	-1	-1	-1	51.2:6001 55.2:15755 59.1:1 61.2:1 62.1:3108 65.1:2225 66.4:12969 80.1:35704 87.9:9041 87.9:893 89:1 92.1:3886 98.1:6571 101:6609 102.1:0 103.5:3035 107.8:2670 111:2906 116.1:9567 118.1:7329 120.8:1144 129.3:1481 129.89999:9067 131.60001:3448 138.8:0 139.8:421 148.60001:2518 153.7:4424 159.8:6132 162.3:2735 165:128 165.7:14125 166.3:11564 173:1711 178.39999:1 197.3:1382 198.7:960 199.2:2166 203.3…
Unknown	2433	13.3873	1176.82	[334.6]	334.6	1211.05	820.762	209126	141730			-1	-1	-1	-1	50.3:879 52.2:0 53.2:1 54:6190 55.3:1629 56.1:1061 58:0 62.1:3464 64.1:2480 66.4:14063 67.1:0 70.3:4616 73.1:0 75.1:0 77.1:1 79.1:1457 80.2:37633 81.1:414 82.9:2124 84.3:1721 85:0 85.8:1 88.9:1 90.2:0 90.9:1 91.5:1 93.1:1 95.1:4298 96:1108 100.1:0 104.8:1 105.7:5671 105.7:4009 110:0 111.9:982 113:1451 114.8:1017 118.2:2706 118.8:0 119.9:0 122.3:266 126:250 126.6:0 128.7:0 130.8:0 136.89999:0 137.…
Unknown	2437	13.3961	1177.16	[116]	115.9	46995.2	94212.1	463221	928628			-1	-1	-1	-1	53.3:15197 54.1:3652 54.1:21818 55.3:1 57.2:0 58:1 62.2:3333 64.1:1266 66.3:2851 66.3:23078 67.2:626 70.2:15099 71.1:7483 79.1:0 81.1:1 82:1 82.9:2491 88.3:8787 88.3:11915 91.4:2819 91.9:7570 92.9:713 97.3:0 97.3:0 97.9:1 101.1:0 102.4:3316 102.4:1 106.1:7320 109.1:0 110.9:4061 115.9:46995 115.9:26072 117.6:15858 123.2:1 126.1:1 133.89999:0 133.89999:1 136.3:12290 137.7:3374 138.60001:1074 141.8:…
Unknown	2438	13.3984	1177.25	[257.8]	258.1	6580.48	11348.3	597576	1.03054e+06			-1	-1	-1	-1	52.2:4570 53.1:14871 54.2:4296 56.1:188 66.2:10008 76.2:36388 89:5385 93.9:14634 96:7895 104:1615 108.1:6778 113.6:1496 117.3:15741 118:5335 121.9:3598 129:2522 135.10001:2591 143.8:7242 145.60001:6302 148.89999:2739 152:24023 157.5:7623 164.5:8517 165.5:10203 165.89999:1675 170.10001:5065 171.5:610 176.3:5746 181.3:2031 193.8:1186 198.2:316 198.89999:665 208:19547 213.3:1757 216.39999:1720 217.2…
Unknown	2441	13.405	1177.5	[319.1]	319.1	42747.3	49265.2	670284	772485			-1	-1	-1	-1	50.2:6240 52.2:3973 64.1:3427 66.1:1 70.1:26262 73.1:2295 74.1:71214 84.4:12084 87.3:3072 87.9:6076 94.2:14977 97.7:5944 101.1:16427 106.3:7237 107.5:6896 110.1:9947 112.2:1899 118.1:5553 122.1:13910 128.3:3693 129.5:5125 129.5:4596 131.2:9996 131.2:11700 141.39999:4174 143.60001:1281 144.60001:1764 150.89999:21773 155.7:11006 159.89999:6298 161.8:2152 163:1765 163.8:3257 166.89999:5549 171.60001…
t-Butyldimethyl(2-styryl[1,3]dithian-2-yl)silane	2447	13.4183	1178.01	[209]	209	141257	278890	6.41379e+06	12662990			-1	-1	-1	-1	50.2:19687 51.1:15820 52.2:28043 53.2:33736 54.1:11076 55.1:46963 56.4:26660 57.1:106462 60.3:15105 63.2:8127 63.9:530 65.2:21122 67.3:66904 68.2:140045 69.2:148634 75.1:190684 77.1:288144 79.1:42221 80.2:32829 81.1:60303 82.2:70258 83.2:34854 84.2:19551 85.4:44388 86.1:32638 89.2:26566 89.2:25205 91.1:30427 91.1:30892 93:41400 95.1:79438 96:27878 97.1:133715 100:80560 101.8:18186 103:52900 103.8…
t-Butyldimethyl(2-styryl[1,3]dithian-2-yl)silane	2449	13.4227	1178.18	[73.1]	73.1	3.41964e+06	7586243	10520634	23339316			-1	-1	-1	-1	52.2:33584 54.1:14705 59.2:92570 61.1:15897 63.2:28551 69.2:16799 70.1:43272 70.8:38552 73.1:3419641 75.1:203323 77.1:526779 85:37241 86.1:40512 87.2:38192 88.9:29874 88.9:30066 89.9:13745 95.9:38814 100:255288 101.1:28979 101.8:29515 103.1:23209 103.1:69484 104.1:38698 105.1:135236 111.1:12001 112.9:14079 114:9746 114.9:15379 116.2:60220 116.8:33513 117.8:18423 119:52289 120.1:86137 121:15247 12…
Unknown	2452	13.4293	1178.43	[152.9]	152.9	81837.7	193345	2.9867e+06	7056205			-1	-1	-1	-1	50.3:32703 51.3:25718 55.2:27561 57.2:21201 58.3:44096 62.3:10261 64.2:1848 67.2:118735 68.1:34235 70.3:23266 71.3:14537 79.1:89304 81.1:18877 82.1:26531 83.1:24082 84.2:12429 85.1:1209 87.1:1561 93:47504 95.1:17179 103.2:4694 105.1:24751 105.9:11960 107:37766 109:22304 110:6460 111.1:7213 112.9:13110 115:747 116.7:7844 119.1:8236 120.9:1110 122.9:79329 124.1:12280 124.9:21249 126.7:18415 126.7:9…
Oleic acid, eicosyl ester	2456	13.4382	1178.77	[243.8]	243.8	511102	1.11163e+06	5621510	12226561			-1	-1	-1	-1	51.3:7443 52.3:26530 53.3:76631 55.1:104 56.3:58263 57.2:1516 58.5:36810 59.1:29697 61.1:203 62:3045 65.1:40190 67.2:50497 68.2:19854 79.2:126554 81.1:169190 82.1:3575 83.2:94462 84.1:42583 85.3:9565 85.8:36292 85.8:47870 87.2:696 93:90100 95.1:171574 97.1:396537 101.9:13581 103:39438 106.9:53316 109:274081 110.9:21082 112:8860 112.9:29686 118.1:8845 120.1:20412 121.4:26519 124:155464 125:1071 12…
Unknown	2458	13.4426	1178.94	[57.2]	57.2	329209	758790	4.08768e+06	9421645			-1	-1	-1	-1	50.3:25671 51.3:20150 53.2:33891 55.3:107707 56.3:69678 57.2:329209 58.2:18549 60.4:7718 60.9:7352 65.1:34685 67.3:222660 68.2:429165 69.2:43094 79.2:124637 81.1:161690 82.2:227179 83:90064 84:38986 87.9:3580 91.1:42713 93.1:26037 95:163601 97:398745 98.5:21434 99.6:156748 102.5:9335 106.9:39246 109:275111 112.9:8236 116.6:18471 120.5:21080 124:152831 125.1:20777 125.7:7559 125.7:4740 127.8:5056 …
Unknown	2461	13.4492	1179.2	[138]	138	13811.8	12031.2	2.36633e+06	2.06128e+06			-1	-1	-1	-1	50.3:440 52.2:18598 53.2:691 54.1:2401 57.2:149 59.2:0 61.8:2200 63.2:5610 64.3:7170 65.1:2679 69.1:51002 71.9:5108 73.1:340958 75.1:0 77.1:104214 78.1:31501 80.3:4808 85:12246 87.2:10911 90:0 91.2:8893 95.1:1178 99.3:6680 100:56681 101:11834 101:9959 102:8675 103.1:18078 103.9:1 105.1:29737 114.9:28284 116.7:20444 117.3:1 118:1 119.1:12169 120.1:0 121.9:4958 123.9:1984 126.6:2252 126.6:1174 128.…
Unknown	2463	13.4537	1179.37	[123.1]	123.1	28063.8	18980.5	626606	423795			-1	-1	-1	-1	51.2:3043 53.3:13128 55.1:10769 57.2:637 59:1 61.9:2312 63.3:894 64.2:4943 64.2:6835 69.3:2458 70.2:9921 71.1:4076 73.1:0 75.1:0 80.4:16519 85.1:5513 88:1 89:0 93.9:2461 95:4994 95.9:4320 101.1:2287 102.4:1 102.4:0 103.1:7013 104.9:4472 104.9:14317 106.1:2706 107.2:240 107.2:4071 111.9:622 112.7:356 114.8:2702 114.8:2332 116:1 117.7:4758 118.9:0 119.4:8290 123.1:28064 127:1010 128.10001:3311 128.…
Unknown	2465	13.4581	1179.54	[188.1]	188.1	11032.8	7844.3	213784	152001			-1	-1	-1	-1	62:1547 66.2:15017 70.2:20688 71.5:7168 75.9:38155 89.7:1786 125.6:1778 131.7:4483 153.89999:2741 166.5:970 167.10001:190 181.2:1311 188.10001:11033 203.8:183 224.10001:4005 229.10001:2530 232.5:1525 260.60001:3993 266.60001:1500 268.10001:1933 268.79999:725 277.60001:819 280.29999:356 281.39999:1243 283.20001:1258 284.20001:549 285.79999:649 288.20001:95 290.5:361 291.29999:52 292.20001:11 292.7…
Unknown	2476	13.4825	1180.47	[266.8]	266.8	18144.9	35718.1	302855	596168			-1	-1	-1	-1	54.4:8846 65.9:11550 66.4:14615 76.1:39445 78.2:24302 88.7:4007 91.7:1 94:12631 98.2:7402 100.8:3797 105:2346 106:379 117.7:1904 132.39999:629 166.89999:1751 183.8:987 185:825 188:1422 195.39999:861 200.7:261 219.5:685 224:1075 229:737 230.8:1309 235.3:1663 240.7:449 244.8:126 250.8:2011 256.60001:480 258.89999:1445 266.79999:18145 267.39999:8100 268.20001:3249 277.60001:160 281.20001:3271 282.60…
Unknown	2478	13.4869	1180.64	[355.2]	355.2	20294.2	29605.7	390446	569592			-1	-1	-1	-1	50.3:6029 51.2:0 52.2:3226 53.2:8900 54.2:8203 55.3:1 56.1:0 57:1 58.1:1 59.1:1386 60.1:1677 61.9:1065 63:1 63.8:1799 65.2:237 67.1:1 68.3:0 69.2:0 71.2:1404 73.1:0 75.1:2090 77.1:330 79.1:1 81.2:0 82.1:0 82.9:0 84:1 84.7:960 86.1:1082 86.8:703 87.4:1574 89.4:2502 89.4:1877 90.9:0 92.6:10495 93.1:11554 94.9:1 96.2:7806 97:0 98.9:1 99.8:3649 99.8:3387 100.9:4216 102.1:953 103:2639 104.1:2414 105:1…
Unknown	2489	13.5113	1181.57	[182]	182	20963.7	44234.9	341813	721252			-1	-1	-1	-1	50.3:7894 54.1:8499 58.4:2484 61.9:1847 64.2:4171 65:3667 70:684 71.8:5544 73.1:1 74:9488 83.9:965 86.1:1 86.8:2097 87.8:1694 88.9:3218 91:547 93.9:8467 94.6:3293 96:2720 98:1757 100.9:1742 102.3:5080 103:1887 105.9:795 107.8:2006 111:1137 112.7:3080 113.2:5537 115:284 116.9:1066 116.9:5729 118.4:1972 119.9:3946 121.7:457 125.4:1091 127.3:1528 129.8:543 130.60001:3432 133.60001:1348 138:276 139.2…
Unknown	2494	13.5223	1182	[166.1]	166.1	10900	22904.5	296121	622247			-1	-1	-1	-1	52.2:14788 53.2:11291 54.4:1366 60:3413 61.1:2807 62.4:1763 66:3976 69.2:11589 71:274 75.1:605 76.1:14813 80.3:28633 83:6020 85.7:2155 90.2:2504 92:4292 102.1:392 106.1:1681 110.1:1049 119.1:735 124.9:940 127.9:683 129.10001:0 131.10001:572 133.5:979 135.8:895 141:762 143:86 144.10001:519 148:5386 149:1787 150.5:556 162.5:86 162.5:2116 164.39999:906 165.60001:7304 166.10001:10900 166.8:1409 167.7…
Unknown	2538	13.6198	1185.73	[67.1]	67.1	36832.7	119354	424001	1.37395e+06			-1	-1	-1	-1	50.3:6830 51.2:5371 56:5293 56:4552 59.1:3874 59.9:506 60.7:6329 65.1:6196 67.1:36833 69.1:6452 80.3:17395 83:3493 87.5:3074 88.8:2336 90.6:7546 94.1:15840 98.1:22032 102.1:4725 108.4:3430 110.1:37544 111.8:327 117.9:5129 118.4:3342 119:3180 120.7:2797 122.5:405 125.2:1015 126.6:3724 127.7:1188 130:1650 131.5:9123 133:1001 138.10001:863 140.2:1021 140.2:2090 147:1300 152.10001:1491 155.89999:5940…
Unknown	2540	13.6242	1185.9	[125.2]	125.2	9473.64	14590	346524	533671			-1	-1	-1	-1	50.2:4311 51.2:1913 52.3:4767 56.2:2396 57.1:4787 59.1:102 66.1:1533 70:8863 70.6:245 71.1:5989 75.1:11711 77.1:4195 79.1:11070 82.2:2203 83.8:1137 84.7:6006 87.3:2188 89.9:1105 95.1:2384 102.3:1810 102.3:4801 103.3:4649 104.5:3634 105.7:3893 106.5:1904 107.1:978 113.2:647 114.5:1484 116.2:1804 117.1:1288 119.2:4419 122.3:2216 123.4:2802 125.2:9474 126.1:2852 127.8:2190 129:2627 129.8:3406 131.2:…
Unknown	2542	13.6286	1186.07	[66.1]	66.1	35468.9	99849.6	722544	2.03406e+06			-1	-1	-1	-1	50.3:14925 51.2:10984 52.2:36186 53.3:15120 54.1:7362 55:829 56:1632 57:3790 57.9:11889 62.1:289 63.3:2925 65.1:2180 66.1:35469 68:32051 69.3:4094 75.1:7674 79.1:34552 81.3:1755 82.1:10284 83.3:10128 83.9:1691 85.1:2988 87.2:4014 88.1:1985 89:6625 90.2:1838 91.4:2978 93.1:3802 94.1:6041 95.2:2649 95.8:5191 97.9:23651 98.8:1504 101.6:4247 103.4:11534 104.1:5203 104.9:2282 105.9:4261 110:59434 114.…
Unknown	2545	13.6353	1186.33	[191.2,136]	190.9	23514.4	55530.9	656834	1.55116e+06			-1	-1	-1	-1	50.3:10538 51.2:1329 52.2:26016 55.3:13157 57.2:4092 57.9:11339 57.9:1495 58.9:3053 63.9:3712 68.1:34348 73:16298 75.1:6056 76.1:3645 77.1:7045 82:2372 83.1:1880 83.1:3772 83.7:1657 85:4455 86.1:3832 87.2:740 89.1:679 89.9:8750 90.8:3895 91.7:4131 95.1:4140 95.8:2693 98:5670 100.1:2493 101:1733 103.3:9992 103.3:6972 103.8:14129 103.8:12400 105:2080 105.7:2723 107.8:3715 111.1:4837 112.1:959 113.8…
Unknown	2546	13.6375	1186.41	[205.8]	206.1	31566.5	74068.7	626234	1.46942e+06			-1	-1	-1	-1	51.3:8853 53.3:18837 54.1:2847 55:8974 56.1:5309 57.4:1604 59:1299 60.1:2715 61.1:2403 62.2:704 63.2:381 67.2:26889 69.2:7588 71.2:5266 71.8:6897 73.1:12815 76.2:19819 77.1:5000 79.1:10644 81.2:4068 82:14376 83.9:2173 84.8:1286 86.1:6887 86.1:4863 87.2:1 87.9:2025 88.9:3527 93:8687 96.4:7764 99:8254 99.9:2554 99.9:12119 100.4:12448 102:3494 103.2:638 104:5400 105.1:2008 106.2:3499 107:1182 109:47…
Unknown	2547	13.6397	1186.5	[188.6]	188.9	6055.13	8930.6	498461	735171			-1	-1	-1	-1	52.3:16608 55.1:975 57:3284 59:88 60:3275 61.1:259 64.5:8232 68.1:9212 69.2:2131 73.1:6824 74:4240 75.1:9969 78:70869 79.2:10299 81:2954 82.3:8439 82.3:3293 83.2:3476 84.1:1644 85.6:1083 86.2:1061 88.6:7957 88.6:5493 89.1:5283 90.4:9079 90.9:5864 91.9:2135 96.3:8015 96.9:9603 98.1:4765 98.9:7072 101:2366 104.1:1519 105:1838 105.9:1386 108.3:520 111:1082 112.8:1705 113.7:438 114.5:125 116:2214 116…
Unknown	2556	13.6596	1187.26	[170.5]	170.8	12406.5	21914.4	372846	658582			-1	-1	-1	-1	59.3:655 60.2:2931 61.2:181 63.2:144 69.2:171 69.9:1374 71:6155 71.8:3336 73:16769 75.1:809 76.2:11156 78.1:34788 80.1:11883 81.3:4987 86.2:2067 87.1:3207 88.9:1 90.9:3526 90.9:1045 98.2:6209 99.1:5953 101:1408 103.3:2359 107.4:130 108.1:2298 108.8:6286 111:4538 113.2:171 113.9:361 115.2:291 115.9:5242 116.5:743 117.1:474 118.1:1141 120.1:2001 123.6:527 127.1:478 127.9:213 128.39999:3608 129.5:16…
Unknown	2578	13.7083	1189.13	[158.8]	159.2	15908.2	34176.2	258021	554318			-1	-1	-1	-1	50.3:7796 52.2:6748 57.1:185 59.2:87 62.8:2646 64.9:27 71.9:4951 73.1:15100 75.1:9905 76.2:1068 81.1:3527 82.7:1370 86.6:128 89:2803 92:382 93.9:3491 94.8:99 95.9:2968 97.2:277 99.1:3040 101.8:592 103.1:1656 103.9:1049 105:758 105.6:208 106.6:326 108:6 108.7:937 111.3:2746 112.2:1104 112.8:624 114.2:695 116:143 117.6:2263 129.8:1371 130.3:1945 132.8:1588 134.8:195 137.3:1440 138.10001:982 138.899…
Unknown	2611	13.7814	1191.93	[154.1]	154.1	11785.2	22091.2	316111	592545			-1	-1	-1	-1	50.4:4397 51.2:5431 53.3:12719 56.2:2050 58.9:1151 67.1:3510 70.9:2453 72:3667 73.1:780 75.1:1335 80.3:17085 81:8266 84:1798 86:2500 87.7:3522 89.9:691 93.1:937 96.8:4010 98.1:1607 99.9:3776 105.8:2682 107.1:2488 111.1:1755 112:5084 112.9:1267 113.8:1237 118.8:2951 122.5:1353 124.2:358 124.7:2921 125.5:1557 125.5:1192 128:3951 129.39999:3871 131:807 132:2688 134.89999:0 136.5:260 137.60001:155 13…
Unknown	2616	13.7925	1192.35	[88.9]	88.9	25880.3	50066.6	657230	1.27144e+06			-1	-1	-1	-1	52.3:14873 53.2:1077 54.1:7250 54.7:9728 55.2:3356 57.3:2834 58.1:4181 59.1:8996 61:3392 63:1299 63.8:2922 66:411 68.1:323 69.2:13667 71.6:6276 73.1:42493 75.2:14210 76.2:22140 77.1:5223 78.1:74666 79.1:16878 82.7:6869 83.8:2352 85.1:7136 88.9:25880 88.9:23490 91.2:6441 91.2:6314 92.1:1686 94.3:5119 94.3:7999 96.5:3898 98.9:6053 99.9:582 101.5:423 102.1:2211 103.1:2492 103.1:4817 104.3:2709 105.1…
Unknown	2620	13.8013	1192.69	[276.7]	276.7	4316.52	3129.62	243740	176720			-1	-1	-1	-1	50.3:5871 51.3:1862 53.1:15786 56.3:1102 59.1:2900 60.5:2613 61.4:1410 62.1:335 63.2:1111 64.9:2593 65.8:890 65.8:3926 67.1:2666 70.2:93 71.1:1061 73.2:17084 75.1:5110 82.1:3682 82.8:4101 83.5:437 85.4:706 89.2:2128 95:1876 95.9:1425 95.9:243 98.5:401 102:731 103.6:408 104.3:3499 104.8:1084 107:3 110.2:3930 111.5:3002 113.6:634 121.9:838 123.7:745 125.6:2414 127.1:232 130.89999:1244 132.7:1200 13…
Unknown	2641	13.8478	1194.47	[220.6]	220.7	25379.8	53915.1	526946	1.11941e+06			-1	-1	-1	-1	50.3:1516 51.3:4478 57.6:156 62.8:872 64:1649 65.1:2660 67:2043 69.1:1795 70.3:1376 71.1:2398 73.1:59421 74.2:7811 75.1:4155 77.1:15713 79.1:10908 81.3:3946 82:2706 84:2685 85.4:292 87.1:1736 89:3520 89.8:699 93.1:4254 99.9:7590 101.8:2186 102.8:1029 103.5:367 105.2:3893 106.7:1398 107.4:1854 108.8:3127 113:2809 118.4:3908 119.9:594 120.9:505 122.2:186 126.1:1730 127.9:738 128.89999:4776 128.8999…
Unknown	2645	13.8567	1194.81	[221.5]	221.8	4064.57	4763.82	336225	394068			-1	-1	-1	-1	50.2:1 52.2:5153 54.2:2162 55:4190 56:4259 60.1:1191 61.5:940 63:1385 66.1:1583 69.2:4447 70.1:1063 73.1:7632 75.1:1 76:30970 83.9:682 87.1:2031 88:2546 94.1:7649 96.2:16 97.4:514 98.5:5954 99.1:6593 99.9:6795 102.4:4726 106.5:2374 107.9:1136 108.6:991 112.4:649 114.7:2309 118.1:0 123.4:1283 126.8:1497 127.7:1 132.8:226 134.3:1053 134.3:2084 137.7:1321 143.10001:1435 144.89999:902 145.60001:2175 …
Unknown	2646	13.8589	1194.9	[216.9,214.9]	216.8	3474.65	5616.7	424873	686799			-1	-1	-1	-1	51.4:2673 52.2:155 53.2:279 53.9:9094 54.5:4715 55.2:317 56.1:1139 57:1 58.1:438 58.9:9676 60:2400 61:3215 62.2:2907 64.8:2865 67.9:1604 71.4:817 72.9:6830 76.3:19396 78:12852 79.2:1385 80.1:14668 82:1053 82.7:2012 84.2:4235 85.4:1325 87.8:150 89.1:3687 91.2:3650 98.6:2158 101.1:3415 101.8:339 104.3:4580 104.9:1358 107.8:726 108.7:3304 110:3855 112.9:348 115.5:1916 116.8:4520 117.4:2383 118.8:153…
Unknown	2656	13.8811	1195.75	[166.5]	166.7	6915.24	12777.9	224917	415599			-1	-1	-1	-1	52.3:17348 55.4:3209 60:2189 63.8:4565 65.8:221 76.2:7112 77.1:9638 80.1:14956 90.4:1322 93.8:8983 101.4:750 102.8:64 108.4:2844 116.9:337 118.2:3284 118.2:114 119.5:771 120.3:617 120.3:6529 125.1:1108 131.89999:3369 138.7:1895 139.39999:652 144.3:1273 149.8:2777 150.7:574 151.39999:67 152.2:1697 153:1511 154.89999:386 156.60001:238 157.60001:130 159.8:695 160.39999:367 160.89999:1023 164.89999:1…
Unknown	2678	13.9298	1197.62	[218]	218	34826.8	63452.7	360638	657066			-1	-1	-1	-1	54.2:9881 57.8:1 59.3:1943 68.1:0 69.9:5037 70.7:4574 73.1:21873 74.1:11943 80.1:4725 96.1:5304 100.1:10056 101:5629 101.9:4997 106:2564 107.4:315 108.2:2888 110:432 110.9:3629 110.9:3040 114.8:2064 115.9:1 118.2:971 122.4:1142 122.4:454 131:5808 141.5:1485 142.39999:3013 142.89999:6837 144.39999:1926 144.89999:6234 151.10001:873 151.7:281 152.5:728 155:760 156.8:2970 156.8:3754 159.10001:1190 15…
Unknown	2681	13.9364	1197.87	[147]	146.8	47226.5	106775	491377	1.11096e+06			-1	-1	-1	-1	52.2:8144 56.1:15731 59:2077 60.2:265 61.3:5313 61.3:3334 62.2:1038 62.9:1577 64:2375 64.9:396 65.9:11488 68.3:1158 70:4439 73.1:68562 76.3:36972 79.1:14175 81:1429 84.7:1 88:753 89.1:0 93.2:9634 95:996 95.7:2093 99.9:9601 101.1:2830 102.9:1 103.7:1710 107:1659 108.1:1291 108.8:4710 110.1:3095 110.1:4615 115.6:2549 116.3:3623 116.9:1911 117.6:53 118.5:1343 119.9:1775 122.8:1173 128.7:432 130.8999…
Unknown	2693	13.963	1198.89	[114.4]	114.4	8713.57	10964.3	1.02443e+06	1.28904e+06			-1	-1	-1	-1	53.3:851 55.2:4737 60:3249 67.2:1845 69.2:21991 71.2:237063 72.3:48470 82:45371 82:18253 83.2:32182 83.2:16792 85.2:140981 88.9:79 91:5771 92.2:3178 95.2:1879 96.3:3409 96.3:7363 98.3:22326 99.2:28658 110.7:7176 112.1:34126 112.9:17711 114.4:8714 119.8:4464 120.9:223 123.2:49 126.3:21143 127.1:37342 127.1:35299 139:2352 140.10001:6602 141:10860 141:15561 142.2:5286 150.3:1456 154.5:245 156.39999:…
Unknown	2696	13.9696	1199.14	[72.3]	72.3	104116	86346.4	461326	382592			-1	-1	-1	-1	51.2:1611 53.2:923 58.2:16989 63.8:5056 66.2:10381 68.2:62854 72.3:104116 73.9:9742 79.1:9975 81.1:23638 82.1:446 93:5221 97.4:22730 101.2:427 102.2:802 103.8:2819 105.9:3909 108:2137 109.1:1955 110:11408 110.7:5427 115.6:1567 118.1:391 120.6:7541 122.9:1656 129.8:6852 130.89999:1 130.89999:3279 136:196 142.89999:11594 144.39999:1390 144.39999:4039 144.8:3374 155.7:2686 156.5:2214 159.8:3 160.600…
dodecane	2706	13.9918	1199.99	[57.2]	57.2	21647046	46004204	60079748	127681216			-1	-1	-1	-1	50.3:4846 51.3:18434 52.2:10235 53.2:454775 55.2:3615915 57.2:21647046 58.3:900404 62.3:8426 63.3:22178 65.1:80391 67.2:418514 69.2:1902644 71.2:14066205 77.1:132106 81.1:18075 83.2:1220195 85.2:7575214 89.1:16189 91:1222 92:11213 93.1:37068 98.2:1825555 99.3:1515266 104.9:19838 107.5:16188 112.2:1029180 113.2:1045089 116.2:12505 116.9:16437 118:1803 126.2:416421 127.3:606833 133.7:23 137.89999:6…
dodecane	2708	13.9962	1200.17	[82.2]	82.2	399122	809794	4566563	9265285			-1	-1	-1	-1	51.3:27986 52.2:13527 53.2:26908 55.2:30811 57.2:93 60.3:352 64:10967 67.2:92062 69.2:231585 71.2:1103718 75.1:2871 77.1:101996 79.1:35415 81.1:97811 82.2:399122 83.2:116902 85.2:605935 88.3:3333 89:11494 91:20956 93:10184 95.2:38125 98.2:128948 99.2:137380 100.3:58767 101.6:4879 103:0 104.1:807 106.7:6004 107.3:9581 112.2:219838 113.3:24669 114.4:36922 115.9:5976 117:12691 120:1 121.7:7969 122.8…
Unknown	2713	14.0073	1200.63	[72.3]	72.3	207161	135257	914032	596782			-1	-1	-1	-1	50.2:13226 51.2:10833 52.2:2082 53.2:2687 55.2:27691 60.3:1426 61:620 61.9:1321 63:6686 63.8:6016 65.1:7697 67.2:23011 72.3:207161 75.2:8037 77.1:49084 79.1:30350 80.2:15076 81.2:21744 87.6:3437 89.1:3056 91.1:9397 92.2:3870 93.1:2954 94:6407 95:12563 96.2:47809 97.2:2525 100.2:5236 102.9:11471 103.8:14306 105:3160 106.5:4606 107.2:169 108:116 109:4303 110:11064 116.1:910 117.5:4298 117.5:6592 11…
Unknown	2719	14.0206	1201.17	[111.1]	111.1	19335.5	15342	1.07929e+06	856381			-1	-1	-1	-1	50.3:9952 53.3:13787 54.3:32247 56.3:78213 60:3497 62.2:2875 63.1:6504 64:5614 65.3:13865 65.3:6019 66.1:6530 67.2:3003 68.2:56757 70.3:203492 75.1:2431 77.2:32974 79.1:35902 84.3:145084 88.2:4308 89.1:3029 89.1:10687 91.1:8630 94.3:12492 95.1:6927 95.9:6611 104:14218 104.7:10062 105.9:244 107:922 107.8:1545 109.1:3340 111.1:19335 115:2296 120:11394 121:8006 123.1:1567 123.8:831 125.2:2198 129:20…
Unknown	2723	14.0294	1201.53	[100.1]	100.1	37313.4	70055.3	1.02592e+06	1.92615e+06			-1	-1	-1	-1	51.3:7513 52.2:15134 56.3:38693 59:5425 60.4:5264 66.2:12976 66.2:22671 70.2:86519 73.1:66747 74.2:22119 75.1:21798 77.1:23542 84.3:4315 88.4:6918 90.2:481 91.3:16326 96.2:2232 100.1:37313 101.9:5310 103.1:18477 104.9:3634 119.1:8475 120:29805 122.4:802 128:2193 131:509 133:9507 134.89999:4860 136.8:2843 137.39999:3785 138.89999:2716 143.10001:5784 144.39999:2734 145.10001:2120 146.89999:148240 1…
Unknown	2724	14.0317	1201.62	[73.1]	73.1	410344	780722	2.03663e+06	3.87491e+06			-1	-1	-1	-1	51.3:8210 52.2:14586 54.2:26634 59:1156 60.4:4917 60.4:6024 61.2:4441 66.1:32114 73.1:410344 74.3:32312 75.1:57983 76:8319 77.1:128105 80.3:8703 84.2:77139 86.4:15419 87.3:4157 92:4093 94:16015 95.8:18343 96.4:22188 100.1:56416 101:5041 103.1:73044 104.5:7639 105:192 105.7:1023 106.8:0 106.8:6012 108.1:1197 109.9:1870 115:18388 115.8:14818 116.6:930 117.3:7478 118.1:2026 118.9:8447 120.2:39242 12…
Unknown	2729	14.0427	1202.08	[174.6]	174.6	9656.08	6007	544337	338629			-1	-1	-1	-1	50.3:2854 54.2:17874 58.9:149 62.9:1933 64:5011 66.2:974 73.1:63924 75.1:14038 77.1:9439 80.2:15172 84.1:1977 86.6:1246 87.3:3779 89.9:2281 96.2:589 100.9:2569 103.1:3498 104.5:4381 105.7:3784 107:4672 107.9:136 111.3:6296 115:5212 116.2:3903 116.9:3877 117.4:6678 120:2394 121.4:2471 122:329 125.1:1859 127.9:11078 129.8:3385 131:3935 132.89999:13938 132.89999:22244 134:2475 136.10001:3015 138.5:1…
Unknown	2735	14.056	1202.62	[368.4]	368.7	2652.29	2650.66	562473	562128			-1	-1	-1	-1	54.2:4085 56.3:13087 59.1:4286 66.2:6128 70.1:10482 73.1:106281 75.1:11565 76.2:12914 87.3:386 88:548 89.8:756 94:2769 100:5169 103:12021 103.9:678 111:28 119.5:2181 120.1:13443 121.1:5618 124.9:477 130.89999:3830 132.60001:3967 133.2:7678 134:469 134.89999:2439 136.7:503 146.89999:46622 148.8:11660 150.89999:25295 151.8:2661 153.39999:1899 153.89999:1611 154.5:758 155.89999:748 157:3588 157.8:21…
Unknown	2743	14.0737	1203.34	[369.3]	369.1	27068.6	52475.5	597294	1.15792e+06			-1	-1	-1	-1	51.2:1783 52.3:9763 53.2:13531 55.2:441 56.1:1 57.2:1 58.2:2660 59.1:3971 62:1 67.2:496 70.2:1 71.1:1 76.2:6473 80.8:0 80.8:1 82.7:11478 82.7:9371 83.2:743 85.3:0 86.3:7120 86.3:5290 89.1:4153 91:1 94.1:1382 95.1:5631 96.2:2591 96.9:0 96.9:1982 98.2:1 99.1:1316 100.1:2150 101.8:1 105:1530 106.7:716 106.7:344 108:112 111.1:1227 111.1:2745 112.8:1589 112.8:1484 115.8:2410 119:3573 122.8:1263 122.8:…
Unknown	2744	14.0759	1203.43	[280.8]	280.8	244554	511013	936643	1957184			-1	-1	-1	-1	51.3:9295 63:1591 66:4341 68.3:1 79.1:2434 86.9:1376 90:1844 92.1:5284 93.1:9903 101.4:2766 103.7:3502 108.6:425 109.9:1187 116.2:2869 116.9:3954 119.1:5753 125:1421 129.60001:1536 130.89999:2317 134.39999:2612 135.89999:23 138.3:1353 140.8:2033 146.8:66003 147.7:31423 148.3:24295 149.60001:3873 153.89999:2867 155.2:578 158.5:169 159.2:902 159.89999:159 162.89999:812 164.2:344 165.60001:923 166.8…
Unknown	2750	14.0892	1203.98	[281.7]	281.7	16211.6	7951.18	298834	146567			-1	-1	-1	-1	50.3:154 51.2:1977 52.2:11131 53.2:10449 54.1:2295 54.8:1 55.5:0 56.1:1 57.2:0 58.1:1710 59.1:1123 59.9:1847 61.9:599 64:1563 64.9:4856 66.3:2827 67.4:3311 69.3:1 70.1:5389 71.1:1 73:0 75.1:1358 76.3:10901 77.3:0 79.1:18404 81:6474 82.4:1633 83:3686 84:1 85:0 85:9487 86.2:3357 87.1:314 88:581 89.1:0 90.1:951 91:2686 92.2:2721 94.1:2644 95.9:1233 96.7:2369 97.6:1 98.5:0 99.8:0 101.8:0 103.2:1 104.…
Unknown	2787	14.1711	1207.33	[145.8]	145.8	4474.21	4702.42	283002	297437			-1	-1	-1	-1	53.1:28036 55.7:3572 56.3:3325 57.9:3284 59.2:727 60:2212 61.2:911 62:4081 67.8:7629 72:3738 73:1583 79.1:15574 83.1:1 86.3:3729 87.2:1446 88.7:1126 89.3:7585 90:289 91.9:3133 93.9:3964 95:1843 95.8:1146 97.5:525 98.9:2831 102.2:1635 103.9:3476 105:3944 105.7:3397 106.3:5278 108.5:1244 109.2:124 109.9:1 111.1:992 113.5:0 119.9:317 122.1:538 128:1173 129.8:4438 133.7:1074 133.7:2505 137.89999:646 …
Unknown	2788	14.1733	1207.42	[186.6]	186.8	1098.62	981.888	301600	269554			-1	-1	-1	-1	50.3:529 51.2:12834 52.2:6466 54.2:6225 55.2:1359 56.1:204 57.2:991 58:2682 59.1:587 62.2:4458 63:3021 64:1 65.1:2522 66:1579 67:3033 67:7238 69:237 73.1:0 75.1:4486 76.2:1 77.1:1954 78.1:29325 82.2:1 84.1:892 84.9:0 86.4:1767 86.4:1426 88.9:8636 88.9:9127 90.9:1 91.5:5350 93:3315 94.1:1328 96.1:2731 96.8:0 97.9:869 98.7:2985 99.8:2734 100.4:0 101.8:1916 102.7:1 103.9:3032 105.3:5328 106.4:4477 1…
Unknown	2802	14.2044	1208.69	[154.9]	154.7	22057.2	55181.9	174236	435897			-1	-1	-1	-1	51.2:724 61.8:238 64.9:1448 66.1:1985 76.1:6154 77:1006 82.9:4201 90:4101 92.8:213 94.8:429 99:377 100:4775 103.8:3401 103.8:2311 109:1082 109.9:3195 111.3:2096 122:1514 123:116 124.7:917 129.3:125 132.8:5011 133.89999:703 134.89999:642 138.3:783 139.3:238 140.8:461 141.7:1214 148.2:528 148.89999:67 150.39999:547 154.7:22057 156:5471 162.3:689 163.3:336 166.5:757 167.3:1025 172.39999:0 175.8:814 …
Unknown	2815	14.2332	1209.87	[297.8]	297.9	52070.4	97265.4	518094	967779			-1	-1	-1	-1	50.2:24240 50.2:24240 54.2:10866 56.2:4478 57.2:4253 57.9:1 59:0 62.2:2446 63:2953 63.8:0 65:2975 65.8:6562 67.7:4707 68.2:2293 69.1:5360 71.2:2601 73:1 76:13599 77.1:7883 82.1:886 85:4374 86.2:1 86.8:0 87.7:397 91.2:2653 91.8:1703 96.6:2532 97.8:1429 98.5:1 99.1:3462 101.9:2335 102.8:3355 110:2001 113.6:1536 114.4:2884 115:0 115.7:869 118.4:2480 120:1871 121.3:277 122.2:916 124.1:1904 125.1:860 …
Unknown	2817	14.2376	1210.05	[298.8]	298.8	7287.1	13434.7	323756	596886			-1	-1	-1	-1	51.2:11781 52.3:4345 53.1:10135 63.1:2827 66:1328 70.1:1063 77.1:8883 79.1:8135 85.1:1143 86:3220 87.1:0 87.8:117 91.9:6164 93.1:1932 94.2:5781 95.1:2924 97.8:1592 99.5:4019 103.8:4236 105.8:0 108.5:1779 111.3:2544 113.2:733 116:164 121.5:1565 123.1:302 124:218 127.2:911 127.9:1 128.89999:281 131.60001:1 132.2:0 133:6136 135.89999:165 136.8:1175 138.2:1467 138.8:1040 140.8:2518 142.89999:2097 143…
Unknown	2823	14.2509	1210.59	[264.4]	264	2033.29	3298.24	414310	672059			-1	-1	-1	-1	50.3:4852 55.2:4436 56.2:4053 58.3:7025 59.1:10753 60.2:1245 61.1:6244 61.9:2184 63.1:536 63.7:1706 65.1:2002 65.9:591 66.5:2922 71.1:4035 73.1:55589 75.1:25901 76.2:4595 77:941 80.1:12277 85.2:795 85.9:4055 87.7:1469 89.2:9042 93:2431 94.7:2289 97.3:1 99.3:4810 100:3914 101.1:10624 102.1:4574 102.9:487 103.9:215 105.5:6008 105.5:1877 108.1:154 108.8:577 110:628 113.1:1618 114.5:3227 115.7:5341 1…
Unknown	2826	14.2575	1210.86	[100.2]	100.2	31707.1	70359.2	372883	827440			-1	-1	-1	-1	51.2:6885 54.2:6249 55.3:37448 57.3:1 59:7804 60.4:654 61.2:27 62.2:2241 63.2:1025 64.1:2912 66.6:2632 68.4:3259 70:6373 70.9:4869 76.2:668 77.2:1 79.2:14484 80.2:3368 84.9:1005 86.2:8840 90.6:5369 90.6:3569 91.8:4968 96:1833 100.2:31707 100.2:1729 101.1:671 101.9:3334 103:1630 103.6:0 104.1:393 104.9:4585 106.6:1055 107.8:2151 108.6:1790 109.9:797 109.9:4998 111.6:1 118.5:9065 120.5:3161 122.1:2…
Unknown	2828	14.2619	1211.05	[155.8]	155.8	98785.8	227675	575190	1325662			-1	-1	-1	-1	52.2:11852 53.2:11849 55.2:37755 62.4:2876 66.1:1531 67.3:1003 68.2:5682 69.4:6759 70.1:3379 71.1:6982 72:14509 79.1:2751 82.8:1829 84:8369 89:9694 93.9:5370 94.8:3592 95.9:3141 96.6:4927 99.9:17670 104.1:1107 104.1:9348 105.7:3262 110.9:1520 115.4:4504 118.9:8060 120.2:4952 121.4:1968 122.5:778 123.3:1492 127.4:5582 128.39999:403 131:9806 132.60001:2651 133.5:3083 134.8:562 135.5:2153 136.7:834 …
Unknown	2831	14.2686	1211.32	[117]	117	120165	306802	931355	2.37791e+06			-1	-1	-1	-1	51.1:7285 54.1:13089 55.2:3163 56.1:11984 57.3:15648 58.1:12595 59.2:11742 60:1081 61:11107 62.1:609 64:3596 67:1591 68:4951 70:16943 75.1:56820 76.1:18364 77.2:8129 79.1:17310 82.2:3026 83.1:2012 84.1:7013 85.1:3704 86:28402 90.9:7305 93:7263 96:2499 98.1:1167 101.2:42366 102.3:7903 102.3:15682 105.9:3386 106.7:347 107.9:1321 112.2:928 112.8:2754 113.5:0 114:3333 114:4582 117:120165 118.1:15591 …
Unknown	2832	14.2708	1211.41	[157.9]	157.9	22872.9	56195.4	738311	1.81392e+06			-1	-1	-1	-1	51.3:8163 52.2:7957 53.1:18985 54.3:13218 55.3:2903 56.1:6162 57.4:13527 62.8:519 65:604 67.3:5116 68.2:5846 69.2:2208 70.2:18636 73.1:136 75.2:4447 76.1:18703 79.1:16184 81:6053 82.9:4349 85.2:162 86.3:15921 87.2:3078 93.2:9539 93.2:5695 94:4205 95.1:3000 96.5:2011 98.3:4514 100.9:13248 100.9:28787 102.8:7941 104.1:790 106.8:1144 107.7:524 110.9:2620 112:992 112.6:3179 117.1:120151 117.9:7354 11…
Unknown	2835	14.2774	1211.68	[73.1]	73.1	298191	667212	1.36479e+06	3.05375e+06			-1	-1	-1	-1	50.2:11386 51.3:11832 54:11355 56.4:9923 58.2:24108 59.3:34212 59.3:35026 61.3:10487 61.3:11237 63.1:3523 63.9:3781 65.1:2712 65.1:5280 66.2:3959 67.4:3028 71.2:4925 71.9:7170 73.1:298191 75.1:30748 76.1:9189 77.2:17888 80.2:24372 81:7868 82.1:3273 83.9:7260 85:8490 86.1:31279 87.2:1446 89:4316 91.3:3361 95.7:3811 96.7:2366 97.8:6411 98.7:4708 98.7:8254 101:92 101.6:10792 101.6:13458 103.7:858 10…
Unknown	2840	14.2885	1212.13	[159.1]	158.8	4816.7	4793.98	239553	238424			-1	-1	-1	-1	50.3:5074 52.2:7012 53.3:9473 56.2:2531 64.8:2130 65.9:2250 65.9:7751 67.1:2002 69.2:10099 71:230 71:4787 78.1:545 83.2:279 84:235 85.3:775 87.1:665 89.9:1530 90.8:640 95.2:138 97:537 98.8:647 103:1 103:10309 104.1:1168 105:298 108.6:37 109.2:892 111.2:468 115.9:7050 120.8:2522 121.5:1916 122.7:515 123.5:552 124.2:1120 125:1202 126.1:508 127.8:1994 127.8:1069 132.89999:0 134.7:557 136.7:890 137.8…
Unknown	2843	14.2951	1212.4	[83.1]	83.1	22141.2	52128.2	472906	1.11339e+06			-1	-1	-1	-1	51.3:5127 52.3:1452 53.2:26605 56.1:7095 57.3:32737 57.3:31237 57.9:4342 59.2:2606 59.9:858 62.3:2459 66:189 67.2:1208 69.1:6511 70.3:8054 71.2:10993 71.2:16374 73.1:1618 76.2:2321 77.1:2953 79.1:19291 80.9:5684 83.1:22141 83.9:2234 85.1:516 90.1:599 92:4477 93.6:20008 94.7:3313 95.2:1300 96.8:1073 98.5:9472 99.1:4189 100.1:195 103.1:2160 103.8:2642 106.5:1711 107.6:520 109.9:650 112.3:3422 113.9…
Unknown	2853	14.3173	1213.31	[57.3]	57.3	16447.1	11419.9	254046	176395			-1	-1	-1	-1	57.3:16447 57.3:26208 61.4:2812 63.3:2550 64:1464 65.3:4830 66.2:4005 66.9:3011 69.9:3188 71:5278 72:2296 81.9:4241 87.1:487 88.1:735 90.7:3961 93:3732 94.9:1594 94.9:9220 98:1457 99.3:3665 103.6:5195 105.9:2175 107.7:11 111.4:685 113.1:139 114.8:1484 116.1:1402 117.9:1103 118.9:840 123.7:1290 124.3:1177 125.8:733 127.8:1551 128.5:2122 131.3:4810 134.39999:101 135.89999:811 137.3:1111 138:232 138…
Unknown	2858	14.3284	1213.76	[220.8]	220.8	2278.44	1786.66	291660	228708			-1	-1	-1	-1	50.3:1896 51.3:4568 53.2:24485 55.2:1 56.2:3562 57.2:11936 59.9:2306 63:1662 64.1:1072 65.2:396 66.9:3608 67.5:4357 69.1:5339 69.1:2580 70.7:6954 71.7:3120 77.1:200 80.2:446 80.9:1379 83.1:641 83.7:0 84.2:2067 84.8:7543 84.8:1 87:1298 89.2:1050 89.9:4426 91:194 94.4:262 96.1:517 98.2:687 99.2:4152 104.1:2284 105:3436 105.9:2122 107.5:505 108.1:1017 111.2:1401 112:185 112.9:728 114.9:1478 120.8:37…
Unknown	2861	14.335	1214.04	[193.2]	193.4	11964.3	25617	208993	447481			-1	-1	-1	-1	50.3:5365 52.3:3268 54.2:844 60.3:1320 63:1405 64.3:3050 65.2:716 66:695 68:4968 69.3:1021 77.1:1326 77.9:20629 86.8:553 88.4:3441 91.1:836 93.1:1128 94.6:9708 104.5:3141 105.7:986 105.7:4406 108.1:192 109.5:219 110.1:184 115.7:874 116.2:3776 117.6:486 119.2:2335 121.8:777 122.6:1130 124:373 124.6:794 128.60001:967 132.8:1615 135.2:559 138.60001:1057 140.8:1 145.5:390 152.3:1220 157.8:524 161.8:1…
Unknown	2864	14.3416	1214.31	[193.5]	193	4998.86	3150.53	217255	136925			-1	-1	-1	-1	53.2:18800 54.2:973 58.6:0 59.1:3121 59.9:1 60.4:534 61.6:3194 65.3:1247 66:1448 66.8:3508 76.1:2129 80.3:4637 81.3:7612 82.1:107 85.1:0 89.8:601 90.8:2839 90.8:3520 92.1:2809 94:4250 94:3157 95:1928 96.2:566 100.1:1356 102.8:1766 105.8:312 106.8:2778 110.1:496 119.9:2870 121.9:75 123.9:505 125.3:123 127.9:819 130.8:186 132.39999:1271 134.60001:1135 137.7:1713 139:0 142.89999:1292 146.8:2130 147.…
Unknown	2872	14.3594	1215.03	[307.6]	307.7	5850.12	13246.9	319380	723200			-1	-1	-1	-1	50.3:6009 51.3:12148 52.3:16494 54.2:3392 58.2:1333 59:2426 62.1:2523 63:1108 68.1:4715 69.2:1 73.1:12449 75.1:1 76.1:9777 77.2:1446 79.1:4216 82.6:0 84.7:1890 86.2:110 91.1:3851 91.1:7979 93.9:4805 95.9:1679 97:2828 98:266 100.8:4509 100.8:4926 103.1:3965 106.2:1896 107.1:2001 108.1:1656 109.1:1620 109.9:575 109.9:2947 112.1:2312 113.9:1101 115:229 116.9:0 117.8:3239 118.6:3725 119.8:5397 122.9:…
Unknown	2874	14.3638	1215.21	[219.6]	220	5970.25	12362.9	314841	651959			-1	-1	-1	-1	51.3:11910 52.3:8611 54.1:4787 55.1:4407 58.6:8642 58.6:4474 60:229 60.7:1 60.7:1801 61.9:1854 64.1:3041 66.1:345 70:7384 70.8:428 73.1:3861 83.2:2860 83.9:669 84.9:670 85.7:1598 86.2:4496 89.8:2234 92:932 92.9:2499 94.7:7628 96.1:1472 96.9:2214 98.2:1960 101.1:2053 105.2:1680 107.3:3299 108.4:1 110.1:160 111.7:1236 112.3:1206 117:0 118.4:4452 119.1:4307 121.2:1048 122.1:0 123.3:1505 124.4:344 12…
Unknown	2876	14.3682	1215.39	[308.6]	308.4	4187.66	6115.5	307009	448345			-1	-1	-1	-1	50.2:604 53.3:3556 54.2:442 56.2:2068 57.1:2703 58.9:1633 61.3:382 64.9:2586 66:1050 67.2:5846 68:1212 69.1:0 73.1:12834 75:0 76.1:8765 77:591 79.1:3007 85.3:2894 86.2:2242 87.7:395 88.9:515 90.8:0 91.5:2848 94:3853 95.1:3551 95.8:4742 98.9:3832 100:3803 102.9:2199 104:4362 105:2338 106.2:1153 107:3205 112.4:1 112.4:4042 113.6:827 118.6:1422 122.8:755 123.7:2032 123.7:944 125.5:1683 129.8:1 131:9…
Unknown	2877	14.3704	1215.48	[226.7]	226.4	12669.7	22821	308292	555304			-1	-1	-1	-1	53.3:22526 56.1:1714 58.1:185 60.1:1511 60.9:1379 65:392 67:4612 67.6:4647 70.6:7593 73.1:8097 79.1:4909 83:2018 84:1750 89.2:226 90:396 91.9:6328 94.4:3769 95.4:5535 96:3196 97.5:2268 99:1025 99.7:1618 99.7:4987 100.2:2834 102:2444 103:2897 103.9:2462 105:1438 107:3083 108.9:510 109.9:1466 110.5:2381 112.4:1007 113.3:1781 115.6:1388 119.6:288 124:3 125.8:205 130.8:1083 131.39999:5677 132.60001:3…
Unknown	2891	14.4014	1216.75	[243.5]	243.3	4792.4	3629.01	277625	210230			-1	-1	-1	-1	52.2:3496 53.1:10317 55.3:4300 55.3:2006 59.8:566 61.2:1854 62.1:881 63.3:2117 65.2:2371 67.3:3267 70.6:1799 71.3:2479 73.1:2042 77.1:1534 79.1:2189 81.1:7308 81.9:5914 81.9:5805 84:1989 85.3:4952 86.3:360 89.8:2382 91.8:163 94.9:1783 95.7:3221 95.7:3749 98.8:671 103.1:1516 103.9:1825 105.9:3246 108:2618 108:702 108.3:1885 110.8:532 116:1413 119:2641 121.2:1901 122.1:1427 127.7:1474 127.7:1946 13…
Unknown	2892	14.4037	1216.84	[155.1]	155.1	16177.5	32249.2	330582	659004			-1	-1	-1	-1	50.3:5442 52.3:2101 54:3415 59.2:1432 61.1:143 66.2:2910 67.3:617 68.4:2989 69.2:4203 73.1:19489 75.1:8910 76.2:892 78.1:127 79.2:6423 81.2:4972 82.2:9572 84:1911 86.9:2289 87.5:1637 90.1:3050 90.9:2154 93.1:3282 95.1:2783 95.8:3658 97.5:406 98.9:3594 104.1:925 105.9:3159 107.6:66 110:1027 110.7:2380 111.5:1656 113:1310 113.9:200 114.8:3569 117.5:162 118.5:517 121.8:182 123:1143 123.7:2204 124.9:…
Unknown	2900	14.4214	1217.57	[274.5]	274.5	2716.18	3373	288913	358776			-1	-1	-1	-1	51.3:4194 52.2:1587 53.1:2636 55.1:1142 56:1168 57.1:3107 57.8:5316 58.3:4720 59.9:334 64.8:1979 65.6:656 65.6:303 71.4:1005 75.1:5855 77.9:37709 79.1:4508 80.4:9619 81.1:1972 82.8:2410 84:2855 85:6495 86.3:170 95.9:19 98.5:3878 98.5:3784 99.9:4322 101.1:538 102.6:3602 103.9:903 105.1:2709 109.2:1384 109.9:154 113.3:1191 114.3:481 115.7:1505 116.8:3096 117.6:633 119.3:1894 120.9:160 124.6:1391 12…
Unknown	2915	14.4546	1218.93	[185.7]	185.7	33812.1	80391.3	512487	1.21848e+06			-1	-1	-1	-1	50.2:1 51.2:23427 53.2:6764 54.2:1776 55:1684 56.1:3052 57.2:8288 58.1:7522 58.8:3700 59.4:5973 61:2238 62.8:4359 64.1:2637 68:5471 69.2:3875 71.4:17 74:9167 75.1:22148 77.1:4181 78.2:18844 79.1:8950 82.9:2285 85.2:4261 86:5047 89.1:29781 90.8:2694 91.5:5809 92.1:4056 93:1603 95.4:8378 98.9:2357 100:1321 100:1178 101.2:3718 104.8:3246 107.3:2844 107.3:2801 110.3:3400 110.3:4339 112.1:8961 112.8:7…
Unknown	2919	14.4634	1219.29	[142.1]	142.1	9532.96	18243	279710	535272			-1	-1	-1	-1	51.2:6415 52.3:29 54.2:705 58:4688 59:1915 59.8:3246 61:247 62:3559 62.8:405 67.9:3539 75.2:19842 77.1:5352 79.1:6895 83.1:1205 84:4044 85.7:3369 88.9:18647 92:1541 95:1416 95:2495 96.2:430 97:1648 97.8:292 99.6:4076 99.6:2895 100.1:1698 100.9:5 103.7:397 103.7:3027 104.8:25 105.9:1098 107.1:3013 108.6:711 111.8:8559 117.8:712 120.5:545 121.1:754 122.9:173 126:2995 128:7419 129:360 135.7:344 136.…
Unknown	2943	14.5166	1221.46	[282.5,248.9]	282.5	36007.3	68454.1	1.05335e+06	2.00254e+06			-1	-1	-1	-1	51.2:2947 55.2:4053 56.1:3907 56.9:7837 56.9:5742 58:182 59.1:202 60.3:222 61.1:2749 62.3:1353 65.1:1675 66.1:1960 67:2664 68:2063 69.3:2000 70.1:4032 71.2:10616 73.1:139907 75.1:9078 79.2:309 80.1:8690 81:5002 81.6:4643 82.8:2375 85.1:6328 86:4643 88:423 89.7:1432 91.1:710 92.1:2090 93.8:1400 94.9:342 96.2:4259 97:1506 98.8:611 99.7:1388 102.9:532 103.8:4135 108:404 111:551 113.2:1897 114.7:65 1…
Unknown	2944	14.5188	1221.56	[206.9]	206.4	10445.6	19819.3	893513	1.69533e+06			-1	-1	-1	-1	51.2:17878 52.3:4406 54:3803 58.5:5213 58.5:5358 59.1:4055 59.8:602 61:4129 64.2:1391 65.1:6048 65.7:1722 68.6:8683 69.2:2322 73.1:26305 75.1:4786 76:7775 80.3:19157 81.2:8711 83.7:1826 85.1:3921 86:7624 88:1891 88.9:1753 90:287 91:63 99.2:4358 99.9:2330 101.9:1519 103.1:3433 106.9:511 109.9:2007 111.8:2992 113.2:214 115.7:1445 115.7:1797 117:11048 120.1:6028 122.1:2107 122.1:381 124.1:1908 126.3…
Unknown	2945	14.521	1221.65	[280.9,146.8]	280.9	194695	398422	1.00773e+06	2.06219e+06			-1	-1	-1	-1	52.2:7397 56.8:4426 57.3:10848 59.1:4408 63.2:5346 64:2779 64.7:5733 69.1:7918 70.2:6576 71.2:12559 73.1:35133 79.2:14865 80.1:13531 82.1:2776 82.9:2168 85:5057 85.6:3826 87.6:3807 87.6:1815 89:1955 89.9:1483 90.8:4533 91.7:2455 93:908 95:982 96.1:5258 98.9:2795 99.5:4422 103.9:1174 104.7:1 104.7:4793 105.9:1630 107.7:1358 112.2:0 112.8:2032 116.9:8792 117.5:1670 118.5:2732 121.8:4067 122.4:1146 …
Unknown	2947	14.5254	1221.83	[264.9]	264.9	36776.8	64627.6	454407	798527			-1	-1	-1	-1	51.3:12955 52.2:10292 54.3:3154 55.3:4069 56.6:4150 56.6:9949 58.3:2847 60.1:2006 60.8:6134 60.8:4753 63.9:3338 68.3:1235 68.3:8004 69.2:1645 70.1:7926 71:11731 76.2:7659 77.2:3048 82.3:3060 84:2848 85:5643 86.1:1514 87.4:1157 88.2:2595 89.1:2585 92.8:2771 95.9:3518 98.6:1730 98.6:4580 100.1:3298 100.1:7043 101.7:501 102.7:0 105:714 106.2:2605 106.8:1279 108:1034 110:0 110.8:1634 111.6:3268 113.4…
Unknown	2951	14.5343	1222.19	[188.8]	188.5	1525.65	1677.14	308118	338714			-1	-1	-1	-1	51.2:19051 53.2:15735 55.1:1187 57.1:627 58:1795 58.5:3285 62.4:817 65.2:1812 69.3:687 71.4:4202 75.1:14312 79.1:11621 80.2:20180 81:4933 84.9:3679 86.2:1373 87.6:987 89.6:2274 91:3349 92:764 94.2:4380 95.8:2635 96.9:2128 96.9:2697 98.1:1016 100.9:1828 102.7:3225 104.8:1642 107:2482 109.2:1 110:177 110.9:2185 115.6:2662 116.7:4005 120:4476 124.9:781 127.9:2253 129.2:4122 129.2:2386 130.89999:2388…
Unknown	2977	14.5919	1224.55	[73]	73	39817.6	91990.2	313267	723739			-1	-1	-1	-1	51.2:1332 53.1:1119 55.1:1231 56.2:1515 57.2:1 58.3:1 59.1:1515 64.1:71 65.1:1729 66.1:3036 67:0 69.3:982 70.1:2558 73:39818 74.2:8688 83.5:2587 84.9:2361 87.2:1642 88.5:3470 90:1385 93.1:3244 95:1 96.8:2577 98:171 99.7:4315 101.8:118 102.9:2936 104.6:1 105.4:3610 107.6:3789 108.3:793 109.8:1 111:839 112.5:1582 113.1:1156 114.7:1 117:2169 118.7:346 122:2226 123.7:621 125:0 127:4485 127.7:1038 128…
Unknown	2979	14.5963	1224.73	[190.9]	191	29179.5	64384.6	413949	913380			-1	-1	-1	-1	50.3:13467 51.2:2354 53.1:14649 59.9:2154 61.2:339 62:3112 64.1:1561 66.1:2991 69.2:2760 70.1:590 72:4742 75.1:15496 76.2:17489 77:3761 78:13594 79.1:16258 81.9:1824 85.1:1799 86.4:3708 86.4:3521 88:1115 90.1:3046 91.1:407 91.8:2807 96:3784 98.8:2115 101.2:4643 102.5:6265 103:9349 105.9:1084 110.8:1062 112.1:1130 114:146 115.2:2476 116.4:3970 116.9:3377 118:520 120:4415 124:2126 126.7:1904 127.6:…
Unknown	3002	14.6472	1226.81	[110.9]	110.9	16801.8	24448	369657	537883			-1	-1	-1	-1	50.3:5983 51.2:4569 53.1:9609 55.1:4765 56.3:3758 58.1:2308 59.1:597 59.7:4156 61.8:566 64.1:1129 67.1:4274 68.1:2124 69.2:11770 70.2:1356 71.3:478 73.1:19609 75.1:9519 77.1:989 79.1:7854 80.1:19750 81.2:4796 82:2645 83.5:4866 85.7:2639 86.3:3152 87:1931 89.1:4493 90.2:388 90.8:5616 92.1:4382 93.1:312 93.8:1597 95:1604 96.4:4111 97.2:1626 98.9:1807 100.9:1796 101.6:302 105.1:1782 106.9:619 107.9:…
Unknown	3015	14.676	1227.99	[272.6]	272.6	12563.2	14214.5	530000	599663			-1	-1	-1	-1	50.3:6584 51.2:3301 53.2:573 55.1:2005 56.2:5145 57:840 58.3:4160 59.1:4690 59.9:1295 63.1:914 64.2:620 65.1:944 66.2:2029 69.2:12418 70:4059 71.9:1760 73.2:12714 75.1:13214 76:5334 80.3:13682 83:599 84:4502 86.3:2665 86.3:4228 89.1:2607 90.1:2847 93.1:5203 95:1045 100.9:525 101.8:6293 103:6020 103.7:3054 104.9:1095 106.7:2027 106.7:2528 108.5:2396 110.8:8931 111.5:1852 112.2:150 114:6231 114.7:5…
Unknown	3019	14.6849	1228.35	[243.8]	243.8	503532	1.11238e+06	2.64027e+06	5832762			-1	-1	-1	-1	50.3:6652 51.2:4860 52.2:12043 53.3:13384 54.2:5555 55:2942 56.2:18258 57.2:12998 58.1:8184 62:1880 63.3:3776 65.2:7009 66.2:8941 67:8426 67:22845 68.1:38151 70.4:10454 70.9:4970 73.2:22664 74:8826 77.1:3741 78.1:43431 79.1:13331 81.7:1046 83:7729 84.1:7764 88.9:10992 91:541 93.1:59901 95.1:807 96.1:1716 97.1:13126 97.9:11725 99.2:15181 99.8:18270 99.8:1483 101.5:1492 102.9:4211 105:5924 105.7:41…
Unknown	3021	14.6893	1228.53	[95]	95	25944.4	48258.5	662250	1.23183e+06			-1	-1	-1	-1	58.2:4011 60.1:1 63.1:4196 64.1:1589 65.1:1169 67.2:17487 68.1:27668 69.3:7185 75.1:7908 78:10787 80.3:13496 81:6175 85.5:6749 85.5:4740 86.9:3083 89.2:7670 89.8:515 93:20134 95:25944 96.8:5254 99.8:1107 106.3:1368 107.8:1177 109.8:1569 114.1:1690 114.8:3325 115.4:17906 116.9:11535 119:3877 120.2:6019 120.8:2439 122:320 123:4540 124:23 124.7:2348 125.5:3884 130.3:1072 130.89999:145 131.7:1699 132…
Unknown	3054	14.7624	1231.52	[224.5]	224.5	4429.34	7575.82	215391	368398			-1	-1	-1	-1	50.2:3453 53.2:6586 58.9:564 61.6:2856 64.9:2601 66.2:496 69.1:6677 70:209 73.2:4179 75.1:11648 77.1:933 79.1:4292 81.1:2255 82.1:761 83:150 84.7:80 105:2846 117:1394 118.6:1676 120.1:226 121.7:586 125.7:2233 130.7:2920 132.8:1922 135.89999:469 138.8:1353 140.89999:1365 143:1415 146.8:17395 147.89999:2540 152.10001:532 161.8:1047 162.3:479 167.3:323 170.10001:355 173.8:778 178.8:323 181:208 190.8…
Unknown	3057	14.769	1231.79	[317.6]	317.9	14895.4	32706.8	361880	794602			-1	-1	-1	-1	50.2:7408 51.3:5463 52.2:594 53.2:1747 55.4:6184 56.2:4376 58.4:2379 60.9:1826 63.1:452 64.1:3557 69.1:7253 69.9:4858 73.2:27734 73.8:2996 75.1:28916 76.1:7624 77.1:4640 79.2:6152 81.1:7014 83.1:757 84.3:2351 85.6:1754 87.1:1101 87.1:201 93:1 97.8:955 99:3831 101:93 101.8:3888 103.2:815 104.1:3673 105:3851 107.8:1422 108.7:1 110:381 111.4:799 112:71 112.9:900 114.8:3389 115.7:0 117.5:2112 119.8:7…
Unknown	3058	14.7712	1231.88	[319.3]	319.3	889.674	984.244	210146	232484			-1	-1	-1	-1	51.2:6688 54.3:747 55.2:624 58.2:15 59:1630 62.4:569 63.1:307 64.2:3412 66:1361 67.3:2327 69.9:3229 71.1:501 72.2:1197 73.1:30068 75.1:6887 79.1:1 81.5:2152 81.5:18 82.9:708 84:388 85.2:1817 86.8:809 92.9:1821 94.7:139 95.9:871 97:77 99.2:1394 101.5:1461 105.2:3202 106.6:778 109.8:44 111.1:1048 111.1:2192 112.9:219 113.7:968 116.1:1701 117:309 117:7970 119.4:3428 120:1632 120.8:1947 126.9:136 127…
Unknown	3062	14.7801	1232.25	[146.8]	146.8	70821.3	148199	389439	814928			-1	-1	-1	-1	51.2:1516 52.3:3106 53.2:5735 55.2:3244 55.9:2096 55.9:788 57:8485 59.1:2802 61:2556 61.7:2338 65.3:1714 65.3:3057 66.2:14 67.2:2058 69.2:5260 71.2:8246 73.2:4401 75.1:17681 80.9:2149 83.8:4105 85.2:5575 87.2:1417 87.8:2075 89:2918 89.8:4129 91.9:6077 96:1588 97.2:391 98.4:609 100:982 101.1:4376 102.8:1144 102.8:4668 105.2:3696 108.7:950 109.9:3604 112.2:235 113.1:1638 115.7:301 117.1:17154 118:1…
Unknown	3095	14.8532	1235.24	[73.2]	73.2	130752	257379	1.28586e+06	2531162			-1	-1	-1	-1	55:5625 58.1:6965 59.3:10574 60.2:2159 63.2:6396 64.1:7218 65.3:5643 66.2:2307 68.2:12699 69.2:21413 70.2:26821 73.2:130752 75.1:33613 77.1:32604 78:46552 79.1:27700 82.1:5 83.2:1514 83.2:1317 84.1:3866 85.9:6132 87:5395 88.3:5163 89.1:1436 90:1185 93:1752 93.9:2895 95.1:1939 96.1:3133 97.5:3611 98.9:19255 101.1:7371 102.2:13066 103.6:18598 103.6:10451 104.1:14449 106.1:3543 107.6:857 108.6:3302 …
Unknown	3097	14.8576	1235.42	[212.8]	212.8	175805	379887	973551	2.1037e+06			-1	-1	-1	-1	51.3:11563 52.2:21180 54.2:6757 55.1:948 56.2:10027 57:3950 60.9:446 63.1:6164 64:6915 65.3:4732 66:2319 70.1:11480 75.1:24927 76.2:33136 81.1:1272 84:5373 85:8992 86.8:304 88.8:6629 90:5548 91:4104 92:16198 93.1:1285 98.1:4578 100:15842 101.2:8155 103.9:14683 105:5035 106.4:4528 107.7:3191 111:11521 114.1:16758 115.2:5237 116:7328 116.9:8343 117.7:8592 118.9:1584 119.8:10296 125.4:1130 126.4:176…
Unknown	3099	14.862	1235.6	[82]	82	31344	72460.9	640478	1.48065e+06			-1	-1	-1	-1	50.4:10878 51.2:16272 53.3:11426 59:5382 60.9:2436 67.1:1369 67.9:12935 69.3:12931 70.2:14104 71:4082 72:11509 73.1:6768 77.1:6381 78.1:32523 79.2:15136 82:31344 83.5:4029 85.1:1448 86.6:3712 89:3944 91.6:10136 92.4:14309 93:1365 95:1 96.2:2721 96.8:1 97.4:2211 98:5563 98.9:5819 99.8:7179 101.9:538 102.9:2754 106.8:1853 107.6:2412 108.5:4179 110.9:8911 112.4:2094 114.1:12357 117.6:6837 119.1:752 …
Unknown	3104	14.8731	1236.05	[171.9]	171.7	8579.73	5484.24	234611	149966			-1	-1	-1	-1	51.2:7531 52.2:3002 53.3:6654 54.2:5097 56.2:638 57.1:1316 58.3:199 60.9:3221 62.5:394 63.2:1387 65.2:1139 66.1:231 69.1:1040 70:1143 73:6269 77.1:3618 80.9:2787 82:655 84:886 85.2:2139 85.9:733 88.7:449 89.6:1262 91:4454 91.6:900 94:72 95:1 95.8:152 97.8:1119 102.8:5345 114:5186 117.7:540 117.7:3456 119.1:572 125:133 126.2:43 127.5:90 128.3:1699 130.7:1713 130.7:1563 132.8:87 137.39999:21 140.60…
Unknown	3105	14.8753	1236.14	[71.7]	72	11794.7	7089.17	268372	161304			-1	-1	-1	-1	50.2:1627 52.3:6092 55.2:3228 59:2725 59.9:1692 62.7:388 64.1:2340 66.3:2464 67:4525 67.6:502 69.3:2657 71.3:3285 72:11795 75.1:304 76.2:17437 79.1:780 82:929 83.3:66 84.8:821 85.3:252 89.5:198 90.9:798 92.1:2610 93:1142 94:3912 95.1:2287 98.8:2111 101.8:1265 102.9:486 106.1:935 107.9:3206 109.2:1675 110:2298 111.2:1 113.9:1143 115.2:1870 116.8:1466 117.4:3101 119.2:783 119.9:4271 120.8:323 123.1…
Unknown	3112	14.8908	1236.78	[220.8]	221.1	3991.59	5653.47	248425	351855			-1	-1	-1	-1	50.4:1308 53.3:6241 57.2:639 58:1666 60.1:1355 66:2184 68.2:2930 78:40447 81.1:1744 83.3:2565 84.1:375 85.6:827 86.6:778 87.2:1298 91:2881 91.6:1945 93.1:2623 93.9:3391 94.9:1961 99.3:3016 107.9:2268 110:3638 111:584 113:2262 116.8:444 117.7:964 118.8:1 123.8:1278 125.8:54 128.39999:2102 129:5608 131.8:2400 133:2729 138.8:1088 140:643 140.5:1572 144.10001:1873 157.2:1036 157.2:982 159.60001:622 1…
Unknown	3117	14.9019	1237.23	[167.1]	167.1	7744.98	11098.2	252572	361923			-1	-1	-1	-1	51.1:1408 60.1:279 62.9:663 65:2107 75:3895 79.1:723 80.3:16322 81:124 95.2:8875 95.9:527 97.9:1847 104.8:404 106.4:2745 107.8:1627 110.2:12814 111:44 112.4:231 120.9:2045 121.6:3831 125.8:671 126.8:1225 128:2675 133.60001:4 134.7:2387 138.89999:182 149.39999:956 150.89999:22891 151.89999:3015 152.89999:1921 153.7:842 164.89999:4769 166.60001:4465 167.10001:7745 169.60001:597 175.5:468 179.7:459 …
Unknown	3121	14.9108	1237.59	[150.4]	150.8	9183.16	11164.6	205150	249414			-1	-1	-1	-1	50.1:1656 52.3:6300 55:1835 55:2484 60.4:183 62.3:1822 65.7:1854 66.6:5715 70.1:3013 82.8:4468 84.4:4592 91:1793 91.9:2282 94:3119 105.3:3379 110.1:1997 111.6:4251 114.9:564 117.9:2022 121.7:9 123.7:3913 125.2:2177 130.39999:986 134.89999:3459 135.39999:4315 138.3:2753 139.5:580 141.8:1243 147.89999:6877 149.5:1319 150.8:9183 150.8:3033 152:904 153:134 159.3:1698 160:633 161.60001:1212 164.89999:…
Unknown	3142	14.9572	1239.49	[73.1]	73.1	149503	315106	459414	968302			-1	-1	-1	-1	50.3:13255 57.9:1002 61.3:4840 73.1:149503 75.1:22193 87.3:5406 93.8:3934 93.8:5356 101.1:11744 103.1:20504 111.9:97 116.3:3955 117.1:73008 118.3:2675 118.9:2410 123.7:1679 130.60001:2556 132.89999:5896 134.7:1204 135.7:1474 146.7:11127 153.7:71 158.5:1813 159.3:749 160.10001:1600 161.7:1556 169.8:1233 176.7:1665 179.7:571 186.89999:269 190.2:1954 191.60001:7556 193:585 193.60001:335 196.5:1474 1…
Unknown	3153	14.9816	1240.49	[285.5]	285.2	1015.09	2099.64	223196	461663			-1	-1	-1	-1	50.3:3828 53.2:9757 58.4:703 61:1259 63.1:1659 64.1:1636 66.9:875 71.3:6324 72:2191 80.2:2735 83.8:1108 85.2:1 88:175 90.8:5231 94.3:4059 99.3:3913 100.1:5279 100.9:1443 107.9:1081 110.2:4024 114.8:1938 117:4803 120.1:1 125.3:0 126.4:2239 127.1:7531 127.1:0 133:1879 135:339 139.2:285 142.7:0 145.8:198 146.89999:3383 155.2:1 155.8:347 156.39999:3013 157.7:2872 159.8:1272 166.2:865 171.3:214 172.2:…
Unknown	3159	14.9949	1241.04	[214.5]	214.9	5800.17	10293.3	235604	418116			-1	-1	-1	-1	58.1:3530 73.1:2015 91.1:6950 91.7:900 100:9962 105.8:7698 119:6307 124:3371 132.8:472 137.10001:5459 138:2250 145.8:5924 148.8:11184 152.2:469 152.8:3621 153.7:490 164.8:2070 166.2:666 170:4633 182.8:1539 184:1093 185.89999:3054 195.39999:1120 195.89999:1223 196.8:215 199.39999:675 201.7:1183 204:525 204.8:1079 206.39999:1340 207.2:307 209.39999:495 209.89999:616 212.39999:0 214:2854 214.89999:5…
Unknown	3160	14.9971	1241.12	[257.7]	257.7	9636.46	17881.5	477815	886637			-1	-1	-1	-1	51.2:1 52.2:0 53.1:1 54.2:0 55.3:0 56.2:1 57.3:0 58.2:1672 59.1:0 60:2230 62.9:1 64.2:0 65.1:0 66.1:1 68.1:1 69.1:0 70.2:1 71.3:24372 76.1:1728 77.1:1 79.1:0 80.1:7852 81.3:4374 82.1:1 83.3:0 84:1 85.3:15430 86:1 87.3:730 88.5:0 89.1:0 91:6833 93.2:0 95.1:0 96.1:0 97.1:758 98.4:5126 99.9:13799 102.1:0 103:1 104:1 106:4933 107.1:0 108.2:0 109.3:0 110:0 110.9:3493 111.9:4195 113:0 114.6:298 116.1:1…
Unknown	3161	14.9993	1241.21	[259.3]	259.5	535.748	471.638	680062	598684			-1	-1	-1	-1	50.2:4148 51.3:2505 52.2:1893 54.2:12577 55.8:31882 57.2:4241 61.8:3133 63.3:520 64:1703 66.2:732 67.1:8784 68.2:3131 69.3:10153 70:8728 72:1120 73.1:1 75.1:14636 78:62302 79.1:521 82.1:8700 83:2631 84.1:438 90.1:11300 91:41 96.1:27861 103:6611 103.7:4576 105.7:5996 108.3:6350 109:832 113:2561 113.6:8322 114.8:1145 115.8:3667 116.9:1391 118.9:2101 121.3:6482 123:12617 124.6:17831 128.2:8284 129.7…
Unknown	3166	15.0104	1241.67	[67.2]	67.2	27742.5	25157.5	425900	386215			-1	-1	-1	-1	50.3:2033 51.2:8492 53.2:4482 57.2:12674 59.3:4606 60.4:394 61.2:684 63.2:945 64.3:5343 64.9:7356 66.1:3721 67.2:27743 68.2:2827 69.2:2160 70.2:8774 71.2:14415 72.2:9055 73.2:0 76.1:4650 77.1:24400 78.1:21766 79.1:5251 81.1:11454 83.3:8853 85.4:13859 87:969 88.1:9504 89.1:416 90:6025 91.1:846 93:4572 99.9:1878 101:6229 102.2:8303 102.9:3143 103.9:2134 107:1514 109.1:2940 110.1:1720 111.1:1942 116…
3-(n-Propylamino)-2,1-benzisothiazole	3170	15.0192	1242.03	[192]	192	2773119	6.27692e+06	11682513	26443236			-1	-1	-1	-1	50.2:18643 51.2:61187 52.2:119658 53.2:70376 54.2:122650 55.2:43842 56.2:37823 57.2:122949 59.3:12616 60.2:1869 61.1:727 62:5528 62.9:5512 64.3:27052 65.2:16276 66.2:55564 68.2:118592 69.2:315272 70.2:273212 71.3:25703 72.2:38555 75.1:39836 76.1:85943 77.2:7804 79.1:68979 80.2:28912 82.2:110261 84:12617 84:13719 87.2:18671 88.1:70468 89.1:167655 91:9118 91.7:5475 93.1:64493 95.1:576886 96.1:85992…
3-Fluoro-5-(trifluoromethyl)benzaldehyde	3171	15.0214	1242.12	[86.2]	86	31838.6	53131.3	4.62125e+06	7.71181e+06			-1	-1	-1	-1	51.2:31229 52.2:118192 54.3:742 55.2:10484 56.1:35336 57.2:6038 58.2:0 59.2:3136 60.1:2856 62.2:5317 63.1:1164 64.3:6208 65.1:8115 68.3:16381 69.2:4565 70.2:13427 72.1:10640 73:6452 75.1:11012 76.2:2736 77.2:63438 79.1:9803 81.1:25842 82.1:7779 83.1:17796 84.1:16033 85.2:5105 86:31839 89.2:19555 95.1:85293 97.3:649 101.2:10598 102.2:9846 103.1:11762 104.1:134521 105.3:1940 106:20693 107:591 108.4…
Unknown	3174	15.0281	1242.39	[90.2]	90.2	11753.9	16194.7	382542	527071			-1	-1	-1	-1	50.2:3174 52.2:4471 54.2:3856 56.3:2135 58.2:1881 61.3:4265 63.1:117 73.2:11355 73.2:11355 84:1465 86.1:3989 90.2:11754 96:40907 98.8:538 104:7687 108.1:9032 113:1782 114.2:3180 117.1:2587 120.1:926 121.1:243 123:3545 124.9:4698 127.9:1183 129.10001:7915 130:3781 131:5664 134:4982 136:5482 145.10001:1519 146.8:311 148:9182 149.10001:39094 149.89999:10950 153.2:219 155.2:1610 157:4584 158:4688 160…
Unknown	3184	15.0502	1243.3	[121]	121	2909.37	2681.3	260078	239691			-1	-1	-1	-1	56.4:4912 60:665 65.4:1609 65.4:3756 71.8:564 76.2:11613 79.2:6311 80.1:31591 83.3:9538 83.3:2181 86.9:192 91.1:796 102.1:301 103.3:2783 109:851 109.9:666 110.7:1166 112:1194 112.9:155 113.2:1884 115:767 118.8:1014 121:2909 122.1:8482 124.1:8155 126.5:1061 127.3:1745 133:696 137.89999:633 138.89999:498 138.89999:404 143:3288 146.7:3374 153.8:684 161.2:1331 178.3:6310 181.60001:1391 182.39999:1034…
Unknown	3187	15.0569	1243.57	[179.9]	180.1	10600	7952.37	209020	156812			-1	-1	-1	-1	53.1:2381 55.1:268 60:1718 60.6:2173 64:2771 65:4980 73.1:10821 81.1:3045 81.1:3045 86.1:0 90.9:335 92.2:8361 94.1:5335 97.1:2487 105:53 108.1:1397 111.3:2131 117.1:2846 119.4:3841 119.9:907 121:2904 126.1:284 133.10001:738 134.89999:1198 137:728 138.10001:1774 146.7:12320 154.7:1211 155.7:696 158.5:895 159.8:1997 165.10001:45 165.8:670 167:85 174.3:5190 178.89999:9355 180.10001:10600 183.7:356 1…
Unknown	3190	15.0635	1243.84	[216.9]	217.3	5474.16	8956.96	277171	453515			-1	-1	-1	-1	51.3:4712 53.3:8813 55.1:0 56.2:0 57.2:1 58.2:5142 61.1:1874 62.1:1684 63.2:253 75.2:2002 78.1:19159 79.1:11942 81.3:1667 82:509 85.1:2113 87.4:453 91.6:3914 97:2527 99.3:2324 100:647 101.1:562 105:6202 106:10143 108.8:0 110:0 118.1:1971 119:3638 119.9:0 120.5:8733 125.6:409 127.6:1 135:865 147:3844 150.8:3561 151.89999:1824 153.2:296 154.2:779 154.89999:1005 155.7:3057 165.10001:1960 165.60001:2…
Benzoic acid; GC-EI-TOF; MS; n TMS; RT	3196	15.0768	1244.39	[178.9,77.1]	178.9	157986	355430	905522	2.03721e+06	OC(=O)c(c1)cccc1	WPYMKLBDIGXBTP-UHFFFAOYSA-N	640.585	830.073	500	788.451	50.3:18720 51.2:14148 58.4:3551 60.8:286 61.5:1325 63.1:3456 63.1:7853 73.1:130 77.1:113846 79.1:6295 82.3:6921 83.9:1098 89.4:9935 90.6:6002 91.2:2591 91.8:4850 98.4:2478 100.5:6199 100.5:5285 105.1:165392 117:4054 119.1:8342 122:14441 122:7464 125.9:226 125.9:1311 127.8:2554 129.7:4016 134.89999:109432 137:6241 139:18 142.5:2495 142.5:2331 158.7:1984 164.10001:3175 165.8:2113 166.60001:443 171.…
Unknown	3201	15.0879	1244.84	[194.1]	193	2228.22	5368.81	323471	779392			-1	-1	-1	-1	52.2:6959 60.1:4047 63.8:1470 65:2234 73.2:9869 74.1:7899 75.1:717 80.2:11069 92.2:5530 97.2:1850 98.6:1417 105:11549 108.6:2981 112.5:78 115.5:1701 117.9:6933 119.8:4231 120.4:1 124.1:1640 125.4:2430 128.39999:1 130.7:3439 132.8:417 134.89999:12451 138.10001:2433 138.8:350 140:2237 140.5:685 144.89999:2015 145.8:4115 146.5:14033 146.5:4580 148:1173 159.5:2000 161.7:1517 165.7:1090 167.89999:1 16…
Unknown	3204	15.0945	1245.11	[232.8]	233	2775.93	4393.68	419528	664018			-1	-1	-1	-1	51.2:0 52.3:0 53.2:6303 54:0 55:463 57.1:1 58.2:2452 59.2:3315 60.1:425 66:1 67.1:2477 67.8:1 69.1:1 70:4127 71.1:4155 71.7:4467 73:24831 74.1:5060 77.1:6081 82:273 83.9:3472 85.3:3016 86:2963 88.2:2854 89.2:1 93.1:1 93.7:6787 95.1:1865 95.1:1 95.9:3390 96.9:1329 98.1:114 99:2873 100:7369 100.9:2711 101.8:782 102.9:1 103.7:1435 105:1391 106.9:863 108.2:3183 108.2:3823 110:1269 111.9:2608 113:1 11…
Unknown	3205	15.0967	1245.2	[230.7]	230.7	40839.3	90660.8	502484	1.11548e+06			-1	-1	-1	-1	50.3:1 52.2:0 53.1:22428 54.2:0 59.2:8027 60.2:498 63.1:1490 66:1 71.6:122 73.1:42841 77.1:25983 81:0 83.4:2823 84:1754 86.2:11430 87.8:1437 89.2:1 89.8:0 98.1:2086 98.7:719 101.8:0 105.1:36452 108:3207 109:0 112.3:1686 113.9:2842 115.9:2159 116.7:3793 117.8:373 119.2:4612 122.9:0 124.1:1587 125.7:1079 128:294 129.3:4975 129.8:5378 130.8:0 132.10001:1778 134.8:30664 135.89999:0 139.60001:143 141:…
Unknown	3208	15.1034	1245.47	[159.8]	160	2887.57	5507.79	372777	711042			-1	-1	-1	-1	53.2:23551 54.2:1753 54.9:0 56:0 58.1:3425 58.1:3881 59.1:4236 60.9:1045 62.3:292 63.5:1666 64.1:2604 65.1:1778 66:757 67.2:0 69.3:692 70:2767 71.9:2429 73.2:21201 74.1:12513 75.2:1 76.1:18718 79.2:3309 82:2630 82:938 83.2:0 86.1:3921 87.1:2965 88.2:1047 89.2:6499 90.9:1353 94:297 94.9:1 96.1:2023 96.8:1 99.9:6042 99.9:6379 102:916 103.2:3252 105.8:5056 108.9:1455 109.9:1 110.7:2425 111.2:1558 11…
Unknown	3219	15.1277	1246.47	[167.5]	167.9	11829	22989.7	317974	617986			-1	-1	-1	-1	54.6:0 55.1:3875 57.1:22805 60.5:335 61.8:289 63:340 69.2:1029 70.1:7301 70.9:17165 71.4:21175 72.1:2705 75.2:7772 83.9:984 85.1:10375 94.3:2558 97.3:541 99.1:515 101.1:1084 104.1:3206 111.3:1935 112.1:3095 117.4:2341 118.1:1884 125.9:3575 127.8:1134 132.8:2921 139.7:1662 141:2836 141.7:2034 141.7:3171 146.89999:3546 148.60001:90 148.60001:1650 153.10001:2333 154.2:704 154.8:1 155.8:5216 157.6000…
Unknown	3232	15.1565	1247.65	[315]	315	4617.77	5114.15	323042	357766			-1	-1	-1	-1	50.3:249 52.2:4445 53.3:6348 54.3:2547 55.2:4646 56.2:4339 57.2:17970 59.1:1286 60:1741 61:117 63:89 64.2:1263 65.2:1008 65.9:2954 68.4:1362 71:9489 71:13178 73.2:3454 75.1:1329 76.3:15353 81:2228 83.1:132 84.3:3265 85.4:11584 85.4:13403 88.1:2580 89:2860 93.9:1711 100.1:2489 103.2:79 103.9:2412 107.6:772 110.9:122 113.1:4013 115:1911 115.5:2096 117.6:2559 119.2:324 120.1:4600 121.1:493 121.1:147…
Unknown	3236	15.1654	1248.01	[73.1]	73.1	175417	353534	1.06212e+06	2.1406e+06			-1	-1	-1	-1	51.2:1180 56.1:7469 57:14058 58.2:10310 59:8220 59.7:1653 60.9:2117 63.1:1915 64.2:78 65:295 67.3:7 69.4:15997 69.4:17811 70.2:10253 71.1:29552 73.1:175417 75.2:16525 77.2:16965 78.1:31482 79.1:2532 81.1:2425 82.1:216 84.1:3175 84.9:6577 86.8:2359 87.9:11953 89.2:4578 90:2153 90.6:4400 91.2:9567 92.1:2116 92.8:4273 95:4428 95:4472 96.1:1842 96.9:1926 97.5:3136 98.6:2146 100.1:24134 101.1:901 103:…
Unknown	3239	15.172	1248.28	[88.7]	88.9	8700.27	6392.97	288075	211678			-1	-1	-1	-1	50.3:5788 52.2:7934 54.7:1 55.3:1616 64.3:542 68.1:5480 70.1:2213 73:17 76.3:15926 80.2:3271 81:911 81.9:256 83.9:1892 88.2:1634 88.9:8700 90:468 91.7:252 94.3:4565 96.1:1767 98.7:1651 101.1:2650 101.8:235 106.1:1414 106.8:845 107.8:1047 113.1:5117 113.9:3698 113.9:7391 115.7:2456 117.1:953 121.2:871 122.9:4882 125.6:494 126.2:221 127.2:1235 127.2:381 129:1337 129:374 129.89999:256 130.89999:969 …
Unknown	3242	15.1786	1248.55	[328.7]	328.6	4423.87	812.172	443582	81436.7			-1	-1	-1	-1	50.2:434 52.2:3849 56:796 59.2:1564 60.3:1310 60.9:42 65.1:865 66.3:205 66.3:788 67.7:1504 68.2:2852 69.3:703 73.1:63457 75:7061 76.2:3473 77.1:12406 80.3:9856 81.2:2043 81.9:706 83.7:3448 86:257 86.9:4802 87.5:1258 88.1:2004 89.1:2743 90.1:1798 91.1:1336 92.1:2110 93.1:314 94.1:350 95.9:336 97.6:1915 100:5818 101.1:2690 101.8:3567 103.9:390 105.8:1026 108.1:370 109:1788 110.1:3988 111.4:1144 111…
Unknown	3261	15.2207	1250.28	[57.2]	57.3	14524.3	18213.3	355041	445218			-1	-1	-1	-1	50.2:1 57.3:14524 57.3:11361 59.1:2579 60.3:122 61.1:449 63.7:1700 63.7:4282 66.1:4650 69.2:0 70.8:217 73:0 75.1:1150 76.2:6218 77.1:5590 79.1:0 81.1:88 82:1 85:1418 86:197 87:1641 88.1:683 88.9:1 90.2:3165 92:516 94.1:4536 94.1:4456 95:2128 97.8:3016 98.7:2709 99.5:5341 100.5:1 101.6:4937 101.6:2695 103:2982 105:1167 106.3:1637 106.9:4285 107.9:818 110:1150 111.1:1389 112.3:805 113.4:556 114.5:2…
Unknown	3264	15.2274	1250.55	[174.9]	174.9	54248	121252	377127	842936			-1	-1	-1	-1	50.2:1 51.2:10314 52.2:1409 53.3:8301 54.1:1432 61.3:4325 63.1:475 64.5:4482 65.2:3695 66:2473 67:1726 68.1:7600 68.1:2919 70.1:2454 71.2:5314 75.1:5020 79.2:8440 83.3:1657 85:4969 91.1:8259 91.8:9694 93.1:4672 93.8:914 95:4283 96.5:1748 96.5:1026 99.7:2550 105.9:1049 109.4:2742 114:1625 114.7:60 116.6:9730 125.7:1740 127.5:566 128.10001:1047 128.89999:4721 135.10001:2604 137.5:296 139.89999:2111…
Unknown	3270	15.2407	1251.09	[367.7]	368.1	30285.4	53829.7	471732	838463			-1	-1	-1	-1	50.3:896 53.2:11420 61.2:1892 62.1:3824 65:4454 70:5501 79.1:21437 81.2:1 82:1614 84.4:3516 92.8:10879 92.8:7101 94.9:2458 95.5:8970 99.1:1457 102.1:2521 105:3882 107.6:1756 109:2085 110.8:375 112.6:144 112.6:1070 113.7:0 114.8:655 119.2:1422 122.7:0 123.5:2531 126.6:1654 127.3:2418 134.2:0 135.7:1166 135.7:1632 139.39999:777 145.7:18519 146.8:15907 150.89999:12 152.7:1920 153.60001:379 155.10001…
Unknown	3271	15.2429	1251.18	[279.8]	279.9	32922.7	64090.5	500087	973519			-1	-1	-1	-1	52.2:5748 55:2143 56:589 57.2:10250 58:2590 59.1:0 63.1:477 66.2:1716 69.2:613 73.1:5021 76.3:27452 78.1:53854 80.1:15653 86.3:0 89.8:3248 92.6:8005 93.9:177 95.1:5297 97.8:1421 103.1:0 104.1:1131 106.5:591 107.8:0 108.7:981 112.1:1045 117.4:376 118:1637 120.1:1603 120.9:0 122:1057 122:1719 123.2:1 126.1:1256 129.7:874 132.3:366 133.60001:2483 135.89999:1262 138.60001:1808 142.2:465 145.8:16328 1…
Unknown	3286	15.2761	1252.54	[121.9]	121.9	45660.2	96457	731106	1.54446e+06			-1	-1	-1	-1	50.2:10224 52.3:3463 54.3:2554 55.4:2469 56:335 58.1:4526 59.1:1006 61.1:3289 63.9:2702 66:1667 67.1:508 69.3:36903 73.1:70976 76.1:14544 77.1:11780 82.1:540 82.7:3105 85.9:4109 86.4:9739 87.2:1129 88:3041 89:3132 93.8:5723 94.7:3005 98.3:5564 100:7743 103.1:41091 105:1194 107.7:271 109.5:4250 111.5:3223 112.7:853 114.6:2643 115.9:6716 116.9:6797 119:6196 119.8:4776 120.5:7493 121.9:45660 125.2:7…
Unknown	3290	15.2849	1252.9	[220.9]	220.9	95357.9	127430	881745	1.17831e+06			-1	-1	-1	-1	56.2:3401 58.3:11934 60.1:2108 61.1:7057 64.1:10700 66.9:1 67.9:4014 75.1:30217 76.1:8491 77:2363 78:40070 79.1:10765 80.1:11889 83.9:8476 84.4:1733 87:451 91:1742 91.8:3232 93:1861 94.7:1583 98.5:1284 101.2:8461 103.1:33337 104:13625 106.7:1228 112.5:4132 114.2:9622 117.1:4463 118.2:16561 121:21092 122:252 124:1535 125.2:1837 127.9:3125 131.10001:4913 134.8:548 136.10001:1936 137.60001:770 138.2…
Unknown	3293	15.2916	1253.17	[74.2]	74.2	41290.6	49260.6	1.57387e+06	1.87767e+06			-1	-1	-1	-1	52.3:5002 57.3:9571 57.3:21328 58:19085 59.2:6110 60.1:821 60.6:14369 61.4:11570 63.1:5494 63.8:1702 63.8:6471 67.2:5235 67.2:7903 70.2:13077 71.2:5478 73.1:662110 74.2:41291 75.1:27827 80.2:7828 84.3:8534 87.1:3361 89.1:9549 91.5:5462 92.9:7031 94.1:5848 94.9:2994 95.6:15118 99:1933 100:3877 101.1:10200 101.9:6798 103.1:2168 104:15958 105.9:1626 107:5284 109.7:2705 110.3:3819 110.9:2812 112.8:57…
Unknown	3294	15.2938	1253.26	[73.1]	73.1	671236	1.45109e+06	3.36047e+06	7.26471e+06			-1	-1	-1	-1	50.2:9827 53.3:1 54.2:2831 55.1:5578 58.2:2634 59.1:82670 60.2:10180 61.8:2784 64.2:17865 66.9:2717 67.5:7829 69.2:34140 70:10685 70:14291 73.1:671236 74.1:64564 76.1:31792 77.2:13690 78:52275 81.2:1947 82:4310 83.3:6584 83.9:11412 86.3:22193 87.2:16661 88.2:25182 89:37203 94:2418 94:11046 95.1:1 98.2:5041 100:41477 101.1:8766 103.1:60640 104:14712 106.7:3705 106.7:4065 109.6:2894 110.6:4711 112.…
Unknown	3296	15.2982	1253.45	[219.8]	219.8	372328	787826	2461327	5.20804e+06			-1	-1	-1	-1	50.3:5321 51.3:15086 52.2:0 53.2:16047 54.2:4680 55.2:11922 56.1:7074 59.2:82515 62.9:4768 65.1:5964 67:7553 68.4:7016 70.5:13614 71.3:14830 76.1:31386 78.1:50021 84.9:11731 85.6:18430 87.1:24990 89.1:41835 90.1:9368 93.1:8412 94:3433 97.1:3059 104.1:8678 105.1:13438 105.9:827 107.8:1492 108.6:1946 109.9:1751 111.4:4562 113.2:2783 113.2:19796 114.9:3602 116.6:40849 116.6:4146 117.8:8322 118.9:484…
Unknown	3300	15.3071	1253.81	[179]	179	48534.3	105337	1.15228e+06	2500873			-1	-1	-1	-1	50.2:9619 52.2:10774 55.3:12460 57.2:1667 58.3:7428 62:2899 66.2:9479 66.2:9322 68.1:4830 69.2:19007 71.2:3677 73.1:69 79.2:22832 80.2:1 80.8:6854 82:6598 82.9:1375 88:18897 91.1:5091 95:6449 96.1:4863 97.7:910 99.8:2455 102:9457 102.5:14607 103.1:27186 106.4:680 109.6:3201 110.8:3232 112.2:6141 113:4234 113.5:10969 113.5:11574 118.9:3466 121.9:13526 122.8:4492 124.8:1037 126.2:923 126.2:4048 127…
Unknown	3302	15.3115	1253.99	[189.1]	189.1	19757.1	16023.5	683501	554337			-1	-1	-1	-1	53.2:1253 56.2:2804 57.2:8500 57.2:8460 59.1:1930 60.9:1632 62:162 62.9:2837 65:4146 67.1:508 71.1:3988 73.1:21791 74.2:11441 75.1:11901 75.9:24651 84:4440 84.9:3423 86:5313 86.8:3659 88:1572 89.1:7969 93.2:2322 94:1671 95.1:6290 95.7:7758 97.3:2432 98.1:2849 98.9:2458 99.7:12219 99.7:6027 101.9:1380 103:8348 106:3910 107.3:3868 107.3:3162 110.6:1281 113.8:1078 114.8:694 117.1:10873 118.2:10314 1…
Unknown	3366	15.4532	1259.79	[244.6]	245	6578.32	6542.43	227210	225971			-1	-1	-1	-1	50.3:4113 54.1:749 56:6078 57.1:5312 63.2:7889 63.2:4104 63.8:608 68.1:311 69.2:3704 70:1476 71:6559 81.2:3237 82.7:2063 82.7:1604 83.5:1571 84:2233 85.2:78 88.9:3338 89.8:299 93:4710 94.5:1409 95.1:2075 95.9:404 99.1:2311 102.6:2470 105.1:4761 106.7:102 106.7:951 109:150 110.2:649 112.4:1556 114.3:860 115.9:4929 117.8:1747 123:693 124.7:351 126.8:925 127.4:1722 132.89999:1767 134.5:1687 135.6000…
Unknown	3370	15.4621	1260.15	[248.1]	247.6	2764.78	4353.95	375229	590907			-1	-1	-1	-1	50.3:1 51.3:6853 52.2:20294 53.2:13691 55.2:1 56.4:3865 57:5030 58.1:1071 65.1:7590 65.1:192 69.9:7128 71:3894 71.6:15419 82:624 83:1912 83.9:939 85:558 87.1:266 87.7:1542 88.2:1130 90.9:2073 93:9098 94.3:1836 94.9:3467 96:459 96.7:1880 97.5:0 98.1:131 98.9:4315 100:0 102.1:3770 103.8:4469 105:402 105:3906 108.6:2545 110.3:2015 112.4:2669 113.2:3987 114.6:5203 116:5034 118.9:2316 123.9:390 127.3:…
Unknown	3372	15.4665	1260.33	[245.5]	245.6	2636.97	6334.33	560664	1.34679e+06			-1	-1	-1	-1	51.2:9660 52.2:15520 53.3:14268 55.3:0 56.2:3918 57.2:4665 59:1 60.1:2759 61:890 62:2719 63.1:440 64:1913 64.8:2009 65.4:2636 66.1:4663 66.9:5287 69.2:0 71:6329 73.1:1 75.1:1 77.2:7240 79.1:9622 80.2:6447 82.2:615 84:1 85.1:1910 86.5:1 87.2:1367 88.6:2016 90.3:927 91.3:4213 93:6676 95:2952 96:0 97:735 97.9:0 99.2:3414 99.8:1583 99.8:5761 101:3526 101.6:293 102.2:764 103:0 104:3245 105.6:1157 108:…
Unknown	3373	15.4687	1260.42	[243.8]	243.8	57534.5	123421	580608	1.2455e+06			-1	-1	-1	-1	50.2:4793 51.2:7397 52.2:16541 58:1509 62.2:3685 64.2:4772 65:6828 66.1:7298 67.1:5610 70.2:1928 75.1:6909 77:763 80.2:3380 91:4067 93.9:10100 98.1:542 99.9:2852 100.9:2441 103:10129 103.5:2471 105.5:3061 108.2:3994 113.1:4592 115:3543 118.5:631 118.5:7151 120.7:7782 122.2:4375 122.9:3269 126:1 129.2:10992 132:5011 133.7:487 136.8:8498 136.8:6238 138.89999:3602 143.7:2663 144.89999:5307 147.89999…
Unknown	3380	15.4842	1261.06	[117]	117	8078.2	16368.6	403556	817712			-1	-1	-1	-1	51.1:4290 52.2:27650 53.2:1 54.1:4812 56.2:5228 59.1:5369 61:1141 64.2:6072 66.7:6414 67.2:5641 75.1:2335 76.2:7441 77:14804 79.2:22407 81.2:1258 83.6:2335 90.8:195 94.1:8482 98.6:964 101:5092 103.1:2379 104.5:4499 107.6:3191 108.7:308 109.4:5047 110:659 110.9:629 110.9:3474 111.8:2220 117:8078 118.9:0 120.9:1568 122.8:2399 125.6:1073 129:6712 132:12524 139.39999:191 142.60001:3770 144:0 145:6937…
Unknown	3382	15.4887	1261.24	[75.1]	75.1	86564.8	210868	585491	1.42623e+06			-1	-1	-1	-1	50.2:2468 51.2:7878 55.2:7534 56.3:2433 56.3:1 57.3:3055 58.1:8158 59.1:7225 60.9:5125 62.4:4446 64:1236 65:1 66.2:4164 66.9:9077 67.4:6322 68:9443 69.2:3612 71.1:0 75.1:86565 76.2:429 77.7:15138 79.1:10138 81.7:9351 82.5:4885 85:511 85.7:1 86.6:2351 87.7:960 88.5:2378 90.9:2940 96:4804 97.2:526 99.5:20870 100:4254 104:895 108.2:437 110.1:1 111.1:2303 113.1:193 113.7:0 116.8:4545 120.1:1736 120.7…
Unknown	3384	15.4931	1261.42	[277.5]	277.7	8304.11	14583.9	433898	762026			-1	-1	-1	-1	51.2:4467 53.2:10890 60.2:3466 60.9:3251 63:1712 69:4094 73.1:87982 77.1:10340 80.2:7235 81:4330 84.2:4510 88:2685 88.7:1726 92.9:1565 94.7:7687 96:4937 101.4:1773 101.9:3310 105:5065 105.6:1403 108:1662 109.4:3049 111:3317 111.7:2800 115.8:2829 117:288 118.1:4683 119:4378 119:3361 120.1:1448 122.9:3911 125.6:1556 126.3:3915 127.9:700 131:2592 132.10001:2080 132.8:4611 134.10001:1782 135.10001:43…
Unknown	3398	15.5241	1262.69	[100]	100	27083.6	53004.6	733692	1.43589e+06			-1	-1	-1	-1	50.3:997 51.3:921 53.2:14830 54:5263 54.9:5437 55.4:10276 56.3:11838 57.1:34271 59.1:8737 60.3:2152 61.9:2584 63.1:47 64.9:1579 66.1:401 68.2:5714 69.2:8525 70.3:8693 71.1:25692 73.1:29001 75.1:1254 79.2:13434 80.2:11604 81.8:2716 82.6:4934 84.1:9084 85.2:33611 85.9:23057 88.3:1979 88.9:252 89.9:1979 90.9:1282 92:7521 96.1:17131 97:4146 98.1:4791 98.8:910 100:27084 101.6:10064 101.6:7656 103.9:31…
Unknown	3400	15.5285	1262.87	[73]	73.1	79824.8	133638	640774	1.07275e+06			-1	-1	-1	-1	52.3:0 56.1:371 57.1:9247 58.2:1050 59.1:1753 60:769 61.1:2368 62.1:1666 63.1:2207 64.5:3609 65.9:3215 67.2:903 71.1:1510 73.1:79825 75.1:8820 76.1:16290 79.1:14510 80.3:2866 83:26 84.2:1742 85.2:1141 85.8:404 85.8:6822 88:2486 88.9:1345 90.8:2265 90.8:7850 93:3085 93.9:4184 98.2:1031 100.1:5952 101.8:8056 102.8:3920 103.7:4514 104.7:2696 106:1908 106.9:0 108.7:2505 111.1:1565 112.3:633 113:1349 …
Unknown	3401	15.5307	1262.96	[317.3]	317.3	6275.63	11386.7	485137	880247			-1	-1	-1	-1	52.2:1 53.3:1391 54.1:1357 55.1:4465 56.2:4908 57.3:4864 58.4:3734 59:1914 60.2:1251 64.1:2844 65.1:1737 68.1:3081 79.2:12023 80.2:15874 85.2:4018 86:1074 88.1:2847 89:412 90.3:2254 90.9:5737 93.8:4686 97.9:7906 98.7:6533 99.4:8787 102:4162 105.2:1451 107.7:1021 108.6:2744 111:0 114.5:7986 114.5:4696 115.1:7677 117:1728 117.9:4058 120.2:633 121.3:3935 121.3:4554 122.8:3046 125.2:1295 125.9:1370 1…
Unknown	3403	15.5352	1263.14	[220.9,230.8]	220.9	11843.8	24159	686319	1.39996e+06			-1	-1	-1	-1	50.3:4068 51.3:2789 52.2:3971 53.2:6896 55.2:2257 56:909 57.2:25193 58.1:3207 59.2:8518 61:1934 62.2:4218 65.9:2568 68.2:1 69.3:6736 70.1:6971 71.2:16724 73.1:923 75.1:1 76.2:12994 77.1:10998 80.9:5119 81.8:1807 83.1:3529 84:11304 85.1:17197 86.1:22510 87:3339 88:437 89.6:2653 93:3860 95.9:0 97.5:1 98:7440 98.9:5914 100:17152 101.1:1270 102.7:5152 109.4:3790 112.6:3503 114:5296 114.8:7723 117:683…
Unknown	3406	15.5418	1263.41	[334.7]	334.6	24651.2	57239.9	411531	955572			-1	-1	-1	-1	51.2:2854 52.2:19194 54.2:5953 66.9:1367 70.1:10140 77.1:4710 78:24156 81.1:6896 94.2:8665 94.9:8021 96.7:1080 99.2:1295 104:3517 105.3:3264 110.3:1314 115.7:1259 118.9:4667 122.7:2907 123.7:518 125.2:2795 126.7:2934 127.2:4366 138.3:978 139.3:323 140.3:4 147.8:9987 153.10001:2005 160:1007 171.3:503 172.60001:3197 177.7:1214 179.3:660 182.8:590 191.39999:661 193.3:2622 194.7:1479 195.7:1235 197.3…
Unknown	3426	15.5861	1265.22	[210.7]	210.7	8055.47	14538.9	609787	1100575			-1	-1	-1	-1	50.2:4853 52.2:15324 53.3:3715 54.2:5398 55.1:3832 55.7:11427 56.2:9083 57.1:8246 58.5:1 59:2724 60.2:429 61.2:3860 62.9:3142 64.2:3349 65.1:2214 66.1:1527 66.8:7319 68.4:5053 70.2:2980 71:5556 73.1:19367 75:19385 76.3:2567 77:2889 79.1:12738 84.1:3523 85:1967 85.7:0 86.7:1903 87.8:1863 88.9:2398 89.5:4610 90.6:4177 91.2:3377 92:4630 93:2477 94.8:8379 94.8:5969 95.8:2725 95.8:6150 97:3698 99.2:61…
Unknown	3430	15.595	1265.59	[298.5]	298.7	57993.6	132205	399414	910525			-1	-1	-1	-1	53.3:18582 67.1:4659 80.2:22844 83.1:3775 88.3:3157 94.3:9702 98:1679 100:2166 101.8:3218 107.4:3591 110:1923 110.7:3497 113.7:0 116.3:10244 119.8:2628 124.6:253 126.4:5958 127.7:1061 130.89999:4001 133.89999:2033 136.89999:1742 139:1425 140.5:1617 142.7:2597 143.89999:3536 147.60001:12664 148.89999:3078 150.3:1370 155.60001:342 156.10001:6342 163:2069 176.5:2058 182.10001:2250 188:2992 188.7:262…
Unknown	3452	15.6437	1267.58	[157.6]	157.5	13945.2	28381.4	291286	592826			-1	-1	-1	-1	50.2:6554 51.2:499 53.3:0 55.1:958 56.2:2551 57.3:1573 59.2:0 60:1 61.2:1 62.3:2858 63:1 65.2:1775 68:289 69.2:2915 70.1:0 73:1 75.1:0 76.3:17991 77.1:2365 78:1418 80.2:8568 81.9:2026 83.4:9898 84.2:782 84.9:1 84.9:353 86.8:1 86.8:1 87.7:2956 88.9:1 90.9:2154 91.6:0 93:4661 94.7:3366 95.3:761 96:1 96.6:2369 99.4:1257 99.4:3005 100.7:1 100.7:1 102.9:0 103.7:7611 105:0 107.1:1 109.1:565 110.8:0 111…
Unknown	3454	15.6481	1267.76	[185.8]	185.8	65966	154435	407040	952931			-1	-1	-1	-1	50.1:4663 51.3:10113 52.2:1385 54.2:5087 58.7:13911 62:2849 67.2:460 69.1:6178 71.4:3520 81.7:2997 83.8:5363 86.7:0 87.9:2031 94.9:1171 97.6:548 100.3:565 106:1596 110.4:1573 111.8:3842 114.3:7988 116.2:66 118.1:6998 120:11412 121.8:1782 121.8:2259 123.7:654 125.2:1469 127.6:1953 128.5:7447 133.89999:2790 136.8:916 139.7:1802 139.7:1441 142:37401 143.89999:5109 147.8:22234 155.7:6612 160.10001:13…
Unknown	3455	15.6503	1267.85	[147.8]	147.8	22156.5	15500.5	171193	119765			-1	-1	-1	-1	51.2:7184 53.2:1 57.2:0 59:1 60:1187 61.2:1 63.2:3404 69.2:1597 70:1 71.7:1827 73.1:1 75.1:0 81.1:1 82:233 82.8:1653 84.1:1450 85.1:0 86.8:1 88.8:1 93.1:1375 96:1771 98.2:1 99:1 99.9:3056 101.2:1 103.2:1 104.8:1 105.9:1 106.5:1 108.9:0 109.5:164 110.7:749 114.6:0 115.3:0 115.9:1 117.1:1 118.9:1 120.1:129 122.4:129 124.7:1199 126.7:1819 128.39999:3277 128.89999:0 131.10001:0 132.89999:1 134.60001:…
Unknown	3462	15.6658	1268.49	[203.4]	203.7	33714.2	23742.9	195522	137695			-1	-1	-1	-1	54.4:3870 64.9:4114 70.8:5951 71.4:9264 95.8:3024 98.3:1583 122.2:1436 123.1:178 123.8:249 126.7:162 127.6:1627 139.10001:685 141.7:4954 143.60001:898 154.89999:1229 156:4725 162.2:3438 181.7:282 182.89999:2189 183.60001:224 185.89999:656 189.7:8091 191.8:16210 198.7:672 200.89999:1259 200.89999:7155 203.7:33714 210.8:1 211.7:922 213:124 215.7:188 220.5:1846 224:99 227.5:299 227.5:237 230.2:1257 …
Unknown	3464	15.6702	1268.67	[88]	88	38194	26020.1	217849	148412			-1	-1	-1	-1	50.3:3607 52.2:0 53.2:6494 54.1:2201 65.2:60 67:17423 71.2:7722 79.1:0 82:0 88:38194 94.4:4206 94.9:1 95.4:5133 97.1:5201 106.1:7837 109.5:648 122:2427 123.7:440 137:1 140.8:0 143.8:3578 151.89999:0 153:399 154.89999:283 160.10001:824 166.60001:1 167.8:0 170.5:0 171.8:0 173.39999:4593 178.10001:9841 178.7:0 182.10001:381 182.7:1013 184:185 188.10001:2225 193.5:1730 194.5:288 196:653 197.2:940 198…
Unknown	3466	15.6747	1268.85	[221.6]	221.6	22246.3	19169.2	545132	469730			-1	-1	-1	-1	52.2:12090 54.1:2249 55.2:11099 58.2:80498 59.1:5282 60.3:105 61.1:4010 62.2:5601 64.2:2842 66.1:1905 67.9:6673 69.2:6537 75.1:8092 77.1:894 81.3:738 82.9:4194 86.1:21922 89.1:509 92.3:3305 96.5:8177 96.5:9646 99.1:5247 106.2:6710 107.3:2733 109.3:932 110.8:771 111.6:2188 113:3378 120.1:16394 120.9:7816 123.2:2043 125.1:1584 126.1:2577 132.89999:16550 134.8:10689 137.8:208 139:521 140.5:2814 142.…
Unknown	3469	15.6813	1269.12	[54.1]	54.1	24431.6	16325.9	567825	379436			-1	-1	-1	-1	50.4:1440 52.2:13955 54.1:24432 55.2:2970 56.2:1283 57.3:5129 59.2:20043 60.3:7598 61.2:16704 66.1:11925 67.2:32556 69.2:14607 70.1:8177 73.1:4 75.1:42042 77.1:3197 79.1:15413 80.2:19201 82:631 84.2:12324 85.1:8413 95.1:1519 98.1:4478 101.1:2290 107.6:10390 109.9:1385 111:4063 121:5947 122.2:1283 123.9:462 137.89999:636 139.10001:1583 139.7:294 142.8:12518 148.8:11631 154.10001:1306 154.8:532 167…
Glycerol; GC-EI-TOF; MS; 3 TMS; BP	3474	15.6924	1269.57	[73.1]	73.1	27557908	53831764	105800080	206670432	OCC(O)CO	PEDCQBHIVMGVHV-UHFFFAOYSA-N	981.344	839.946	648.649	915.555	50.3:5532 51.2:17990 52.2:22548 53.1:60388 55.2:230624 56.2:87397 57.1:94947 59.2:1607562 60.2:151947 61.2:264931 62.3:13333 63.2:15977 63.2:27654 64.2:1003 65.1:1210 66.1:183436 68.4:12180 69.2:3421 70.2:108424 73.1:27557908 75.1:2928768 77.1:135889 79.2:52923 81:15834 81.8:6804 82.9:24807 84:20774 85.2:205099 86.3:28563 87.2:218255 89.1:958850 90.9:49880 93.1:832 94.1:13866 95.1:25053 96.1:1213…
Glycerol; GC-EI-TOF; MS; n TMS; RT	3477	15.699	1269.85	[220.6]	220.7	107007	116131	1.55833e+06	1.69121e+06	OCC(O)CO	PEDCQBHIVMGVHV-UHFFFAOYSA-N	708.104	676.145	477.273	765.618	51.2:3913 55.2:10134 57.1:5137 62.3:8524 63:3964 63:6859 64.4:148 65.1:938 66.2:4683 68:9112 69.2:26957 70.1:7021 71.3:8377 73.1:21 77.2:1826 79.1:13609 83.4:6797 83.4:1059 85.1:11347 87.2:10821 91.1:249 92:6934 93:3049 95.1:2070 97:5743 97:20078 99.1:5659 101.1:22563 103.1:29905 108.9:3542 110.8:5730 113:11819 115:9968 117:35833 119:3240 123.1:2279 125.3:1751 129:13353 131:16920 132.89999:194783…
Unknown	3479	15.7035	1270.03	[144]	144	11738.7	9620.34	715112	586064			-1	-1	-1	-1	50.4:4881 51.2:4409 52.2:23570 55.1:1488 56.3:5111 57.2:13796 59.2:36330 60.3:4159 61.2:20805 63.9:6259 66.2:9815 69.2:14392 70.2:5224 71.1:87533 75.1:530 77.1:19423 79.2:2947 80.5:10879 84:10813 85.1:22186 89.1:4912 94.6:4859 95.1:4743 97.2:862 99:3170 101.1:17115 103.1:11956 107.1:416 109.8:923 110.9:5256 111.8:3052 120.3:20021 121.1:19619 121.8:4944 124.4:295 125:1943 136.8:4685 138.89999:551 …
Unknown	3488	15.7234	1270.84	[173.8]	173.8	13871.6	11236.2	420209	340374			-1	-1	-1	-1	50.2:8398 58.3:13328 65.1:5705 68.2:3644 71.2:15328 74.1:99382 79.1:0 86.1:13863 91.7:8922 93:1481 96.1:3905 97.9:414 99.9:12482 104.1:16332 108.9:1051 119.9:9864 124.2:739 136:299 139:854 150.10001:4323 151.5:4097 153.39999:2223 153.39999:439 155.7:1283 159.8:166 160.3:6607 168.2:96 170:1 171.5:2091 173.8:13872 187.8:1596 192.10001:6780 194.5:671 195.39999:1273 196.39999:137 199.60001:343 201.39…
Unknown	3489	15.7256	1270.93	[216.7]	216.7	13613.8	10296.7	221516	167542			-1	-1	-1	-1	51.2:4544 52.2:1 53.4:2435 55:1 56.2:1 57.3:0 59.1:1 60.2:1 61.1:0 62:0 62.9:0 64:2239 66.3:1 68:2701 69.2:1 69.9:0 71.2:3596 73.1:0 75.1:1 76.9:2705 76.9:2990 80.6:8009 81.3:1 82.2:2332 83:1 85.2:1 86.1:0 86.9:1 89.1:0 90.7:0 91.3:1 93:6703 94:1 94.6:0 95.2:1 95.2:3483 96.9:1 98.9:0 98.9:1 101.2:0 103:1 104.5:14183 105.1:0 106.2:5065 106.2:807 108:2604 109.5:2258 110.1:254 110.9:0 111.5:0 113:1 …
Unknown	3491	15.73	1271.11	[115.9]	115.7	13760.8	16790.5	232350	283505			-1	-1	-1	-1	50.1:1225 53.2:11083 54.8:7133 61.9:1908 65.1:0 68.1:2366 77.9:3958 79.2:3370 95.6:822 99.9:8371 105.9:2923 107.9:2251 114:3015 115.7:13761 122.9:1 124.8:551 127.6:5375 127.6:1858 129.8:7256 133.89999:3792 153.7:1358 155:3110 156:332 156.7:918 165.7:684 166.5:244 168.60001:1994 169.89999:2256 173.60001:2884 180.89999:0 183.10001:2633 183.89999:1 187.60001:277 188.2:2440 196.7:871 197.89999:429 19…
Unknown	3520	15.7942	1273.74	[429.4]	429.6	2450.72	4181.16	191231	326257			-1	-1	-1	-1	51.2:911 52.2:1705 54.4:389 55.2:564 56.2:1112 58.3:2504 60.1:2606 62:2701 62.9:1162 64.2:0 64.7:1160 67.5:0 68.3:1878 69.2:5907 73.1:5316 81.3:1436 82.5:3354 83.1:1 86.2:498 88:1778 89.1:1200 93.1:500 93.1:2189 94.9:1918 96.5:1138 98.9:622 100.9:1979 102.8:1206 102.8:833 103.2:2143 105.6:4138 106.5:1749 107.9:1668 111.2:508 111.2:862 114.1:2690 118.8:2128 120.9:1013 121.9:94 125.9:1549 129.7:293…
Unknown	3540	15.8385	1275.55	[57.2,71.2]	57.1	167622	348341	980732	2.03809e+06			-1	-1	-1	-1	50.2:259 51.3:2610 52.2:5996 53.3:14995 54.2:6025 55.2:33586 57.1:167622 58.4:7069 61:1 63.1:2496 63.9:4439 67.1:5788 67.1:11577 68.3:9699 69.1:30720 69.9:15973 71.2:163510 75.1:0 79.2:784 81:9018 82:1985 83:24454 83.8:29908 85.2:103646 86.7:4100 88:1813 89.9:159 90.9:529 91.9:25 93.8:1565 94.9:4389 97.1:7684 98.3:2877 99.1:30508 99.9:5528 102.8:2105 104.8:898 105.8:3755 106.6:3703 107.2:0 108:93…
Unknown	3544	15.8474	1275.92	[70.1]	70.3	21470	24739.5	265908	306401			-1	-1	-1	-1	50.3:5135 52.2:3421 58.2:3158 59:3504 65.3:310 67.8:5292 69.3:2198 70.3:21470 71.2:1785 72.2:4278 73.1:7032 80.1:3773 81.5:4339 82.6:6700 83.3:7358 88.9:313 91:1326 93.1:1236 94.9:4952 100.9:2135 104:2858 104.7:1902 105.9:1630 111.6:6432 113.1:6317 116.9:3778 118.8:2823 118.8:5541 121:70 122.9:773 123.8:669 129:1879 129.60001:1018 132.10001:22 132.60001:2713 134.2:2600 134.89999:1576 135.60001:80…
Unknown	3573	15.9116	1278.54	[321.5]	321.8	55899.6	121195	604923	1.31152e+06			-1	-1	-1	-1	50.2:2300 51.2:2142 52.2:1505 53.2:645 57.4:5434 58.2:16135 59:9541 61.3:659 63.2:3890 65.1:2160 66.1:2807 73.1:74651 76:9842 77.2:1243 81.9:2956 85.7:2990 86.3:6081 88.1:2892 89.1:27057 89.1:24734 89.8:667 90.9:0 94.2:317 95.1:1481 96.9:1893 98:1245 99.7:3478 100.5:3097 101.1:2892 103.2:14409 104.7:4592 105.9:805 105.9:2427 107.1:426 108.9:1147 109.7:1670 110.9:6 113.1:845 114:3935 114.8:468 118…
Unknown	3575	15.9161	1278.72	[233.7]	233.7	17087.2	33938.3	464742	923061			-1	-1	-1	-1	51.2:7568 52.3:5033 53.1:936 54.2:2193 55:2424 56.2:647 60.7:1360 61.2:5172 64.1:747 64.9:1735 67.1:3719 69.2:5409 71.9:1294 73.1:1062 76.1:23126 79.1:3374 81.4:699 86:657 89:9542 90.2:5495 92.1:3086 92.9:4361 93.9:2651 95.2:3249 95.9:0 97:1255 97.8:4076 99.6:966 100.1:1883 101.3:1084 103:3989 107.3:1280 109.7:435 113.3:2068 114.3:2925 115.6:1 116.4:6874 118.6:4487 119.6:5054 120.2:2847 121.6:148…
Unknown	3580	15.9271	1279.18	[89]	89.9	5056.91	14638.4	380124	1100361			-1	-1	-1	-1	52.2:374 55:4145 56.9:1701 62:749 63.8:2229 65.1:2468 67.4:5949 69.3:34 70.2:6510 71.1:3570 73.1:6885 75.1:5289 76.2:10226 79.1:6032 82.1:826 83.5:104 84:9161 85.1:3665 85.9:1375 86.9:1134 87.8:281 89.9:5057 90.7:1746 93.1:713 94.9:5478 96.1:4194 98.2:3069 99.4:6559 101.2:2731 105.1:3435 106.8:3116 106.8:1965 110.2:2057 114:3280 115.7:4725 116.7:2901 118:1410 118.8:201 120.3:1436 121.6:1328 123:6…
Unknown	3583	15.9338	1279.45	[73.1]	73.1	89617.5	297486	571314	1896483			-1	-1	-1	-1	50.2:3823 51.2:3007 53.2:9006 54.1:3864 58.2:8029 59.2:9686 60.1:4019 62.2:5289 64.1:1985 64.9:3270 70.1:7708 73.1:89617 75.1:15165 79.1:4651 81.8:5041 82.6:1727 84.1:6287 84.9:6605 86:575 87.2:2023 88.1:5077 89.1:24288 90.9:4472 95.9:1647 97.2:2446 101.3:4165 103:5165 105.3:8092 105.3:4125 106.5:3196 107.6:2702 113:4721 113.7:5193 118:390 119:2551 120.5:3474 121.3:2411 122.8:2114 123.5:3050 127.…
Unknown	3587	15.9426	1279.81	[351.8]	351.9	17820.7	30996.3	396613	689849			-1	-1	-1	-1	51.2:4418 54.2:1101 56.1:3920 57.3:2360 59.1:5049 61.1:929 62.1:3495 62.8:5643 64.1:371 66.1:865 67.9:5262 70:4346 71.2:1019 73:149 75.1:15750 77.2:7941 80.6:15300 81.1:2903 82.1:3804 82.9:1496 84:559 84.8:3369 86.2:2208 87.8:2398 89.2:4654 89.2:2956 91.1:2199 96.2:2578 97.4:1639 98.1:1012 101.8:776 108.1:936 109.3:1849 110.4:592 111.3:469 112:569 112.7:670 114:1874 115.7:2253 116.2:1852 118.4:31…
Unknown	3590	15.9493	1280.08	[207]	207	21735.2	52032	411574	985270			-1	-1	-1	-1	52.2:3588 53.3:9398 60.2:128 60.9:1972 62.1:4051 63.9:2955 64.9:81 66:3830 67.2:1315 68.2:4296 71.9:747 79.1:10426 82.7:648 84:6272 86:6931 87.6:8065 89.5:9419 93:5163 94:2232 94.9:4745 100:7318 103.3:2013 105.4:4245 107.2:1556 108.1:71 109.8:1856 111:3401 111.9:1072 114.1:2241 114.7:1 116:2822 117.2:4144 118:1717 120:5351 121.5:2215 121.5:4754 122.6:1210 125:1818 127.9:1167 129.5:4537 130.3:3819…
Unknown	3613	16.0002	1282.17	[313.7]	314	11253	19693.7	682667	1.19473e+06			-1	-1	-1	-1	50.2:7017 52.2:1858 53.3:13189 55.2:1 55.9:9106 55.9:5269 59.1:4716 61:2437 63.8:6264 65.2:2221 66.4:5264 68:5925 70.1:813 70.8:1374 73:43684 74.2:4184 75.1:2689 76.3:15554 78.1:16762 82.7:1675 82.7:3279 84.3:3935 86.2:279 87.7:2118 89.2:1 91.6:5239 92.8:7778 94.1:3782 94.1:5260 95.1:2204 97.3:22 97.3:1183 97.8:1067 99.7:2157 100.2:2954 100.9:3997 101.7:1467 102.6:3591 104.1:3190 104.9:2648 105.5…
Unknown	3615	16.0046	1282.35	[297.7]	297.7	154232	358261	854672	1.9853e+06			-1	-1	-1	-1	51.2:3262 52.2:5116 54.5:1224 54.5:4582 56.4:8108 58.2:8078 60:5 61.2:2490 62.1:1439 63:1345 64:2973 66.9:1133 67.4:9596 71.3:3267 73.1:76217 75.1:7543 77:990 79.1:2776 83.9:5487 85.5:4163 86.7:4973 91.4:1571 93.1:612 96:762 97.4:1077 99.7:2431 103:3268 105.1:2700 107.2:2448 118.9:3410 120.1:532 120.7:695 122.1:444 123.5:839 124.2:508 124.8:798 125.5:0 126.1:1 127.8:4954 132.2:9975 132.89999:2192…
Unknown	3616	16.0069	1282.44	[212.6]	212.4	3392.98	4081.71	574497	691111			-1	-1	-1	-1	50.2:1884 51.3:1258 55.2:4599 55.2:10895 56.2:6283 57.4:1 58.2:1294 59.2:4934 60.1:843 64.8:1 65.7:3979 65.7:4028 67.1:5648 67.1:3553 69.2:575 70.3:1087 70.8:6603 71.5:1416 73:41087 74.1:13819 75.1:5107 77.1:7803 78.2:20146 79.1:144 81.1:1660 81.9:1162 82.7:2074 84:4977 85:0 85.9:1366 85.9:4774 87.1:1668 88.8:2382 90.6:1 93:3341 94:4821 96.3:0 97.7:555 98.8:2014 99.6:1049 100.7:3002 103.2:2445 10…
Unknown	3619	16.0135	1282.71	[228.4]	228.8	3306.95	1649.68	169087	84349			-1	-1	-1	-1	52.2:1453 54.1:516 54.8:2608 58:2059 60.2:609 61.1:545 62.3:1161 63:1124 66.1:753 69.3:1315 73.1:3279 76.2:1099 77.1:4926 79.1:3681 81:2841 82.1:1393 86.9:1484 88.3:495 89.2:0 91.1:2287 93:300 93.8:3231 103.1:644 110.5:623 116.5:3377 119.6:391 123.7:1155 124.9:925 125.6:832 126.1:1511 126.8:422 130.5:1740 136.7:1757 137.3:65 139.60001:499 143.60001:158 147.39999:6121 150.3:56 151.10001:792 153.8:…
Unknown	3622	16.0201	1282.98	[300.5]	300.1	35919.9	13025.7	504746	183037			-1	-1	-1	-1	50.3:895 51.1:3923 52.2:11461 58.1:2493 59.1:682 60:1459 60.9:1768 63:1369 64.1:2537 64.9:3460 67.2:0 68.3:5613 71.9:3918 73.1:3894 76.1:3454 79.1:7518 81.6:741 82.3:2032 87.3:1081 90.9:264 93.9:4890 94.9:3318 105.2:3680 107.2:109 108.4:331 113.6:387 115.2:2422 118.1:3126 120:910 121:420 122.3:453 123:923 124.6:307 125.9:536 128.7:1010 132.8:2615 133.8:1788 135.7:133 136.3:326 137.2:1249 138.5:20…
Unknown	3633	16.0445	1283.98	[57.1]	57.1	26830.7	51167.7	475043	905935			-1	-1	-1	-1	51.2:15497 52.2:8765 53.1:16061 54.1:3062 55.3:5580 56.1:0 57.1:26831 58.2:429 59.2:5374 60:2800 61:1 66.9:3390 67.5:1685 68.1:590 69.2:3173 71.1:8491 72:3953 73:0 76.2:20661 77.1:1 78.1:32144 80.3:8186 84.1:9837 85.1:13639 87:1751 88.9:7295 90.2:1420 92.8:1780 94.9:897 96.4:4087 96.4:2963 98:1429 99:6717 99.6:7980 100.9:1289 102:1069 105:3833 105.6:0 106.1:5815 107.8:751 109.5:901 110.2:1600 110…
Unknown	3634	16.0467	1284.07	[71.1,119]	71.1	23352.7	41510.5	382750	680356			-1	-1	-1	-1	50.3:7991 51.3:13038 53.2:23543 64.3:4645 65.1:3918 65.9:1310 70.2:8401 71.1:23353 74:7009 75:9305 76.2:8720 79.1:4508 83.7:9565 85.1:7066 86:4506 89.1:9341 92.1:2897 93:1 94.2:38 95.1:381 96.7:3501 102.1:1154 102.1:7695 103.2:2019 104.8:3388 107.1:0 108:1105 109.8:1857 113.4:812 115.8:2870 120.1:0 120.1:1320 121.6:1032 121.6:273 124:795 126.1:3280 128.2:43 129.39999:3655 135.89999:1899 135.89999…
Unknown	3637	16.0533	1284.34	[186.8]	186.8	35922.4	73832.6	582267	1.19675e+06			-1	-1	-1	-1	50.2:5101 53.3:21359 56:5553 57.2:27850 62.1:4754 65.1:3513 66.3:70 67.5:6732 69.3:2894 77.2:6796 79.2:1805 80.8:2418 80.8:5049 82.8:5404 82.8:5996 84:5518 86.3:3505 88.1:2883 89.1:2061 93.7:3959 97:2592 103.3:4128 104.1:10225 104.7:0 110.7:1931 111.7:633 113.2:4379 114:2539 115.8:3048 119:33491 120.2:3206 122.1:1447 126.5:3003 127.7:1774 130.3:15825 130.3:21540 131.10001:1903 134.2:1812 142.7:39…
1-deoxyerythritol	3651	16.0844	1285.61	[73.1]	73	106440	215273	822353	1.66319e+06	OCCC(O)CO	ARXKVVRQIIOZGF-UHFFFAOYNA-N	480.204	879.642	724.138	782.133	51.2:1786 52.2:11085 53.2:10988 54.1:3909 55.1:6954 58.1:6444 59.1:4450 61.1:1891 61.9:2708 63.1:1280 64.3:1511 67.2:1748 68.2:3145 73:106440 75.1:33473 76.1:12627 77.1:2872 79.1:7909 80.9:1 82.9:2938 85.2:5781 88.9:582 91.1:1126 92.6:13654 93.1:6281 93.9:7848 95.2:5314 95.8:3071 98.4:3024 100.2:4214 101.3:10709 103:14011 104.2:6483 105:3793 105.9:1328 105.9:2280 107.9:4808 107.9:1516 114.1:3227 …
Unknown	3652	16.0866	1285.7	[117.2]	117.1	21680.3	45927.6	507675	1.07546e+06			-1	-1	-1	-1	54:4436 55.3:4399 55.3:2225 57.1:16962 58:7638 60.1:2906 62.2:2889 64.5:8281 64.5:4928 64.5:1135 65.9:6721 66.9:1997 69.2:1294 70.5:3249 73.1:103970 76.3:6425 83.6:2979 83.6:4880 85.1:2287 85.7:1235 86.5:3260 88.2:3078 90.8:3697 92.2:10058 92.9:1771 94.8:4983 95.9:1678 96.9:3171 98.9:2645 99.4:4075 104.6:2011 105.9:3770 107.1:2840 107.8:4819 108.9:3886 110.8:3118 112.1:1752 113.2:512 117.1:21680 …
Unknown	3658	16.0999	1286.25	[342.3]	342.4	2504.72	2541.05	220133	223326			-1	-1	-1	-1	51.3:4454 52.2:218 54.1:1029 63.1:3 64.1:106 69.3:8266 70.3:1365 75.1:8403 77:561 79.1:2214 80.1:1541 84:124 89.1:1749 90.5:3078 91.2:1821 91.8:317 94.3:2519 94.3:3045 95.9:1779 96.7:307 97.4:653 100.8:2221 102.3:829 105.4:2722 106.8:323 108.1:1075 109.2:160 109.7:2013 112.4:11 117.1:1526 117.8:138 120.3:493 124.1:3166 125.8:655 129.2:2647 129.2:1929 131:4072 132.7:981 133.3:7730 137.8:639 137.8:…
Unknown	3682	16.153	1288.42	[157.7]	157.9	38681.3	83956.8	342977	744422			-1	-1	-1	-1	52.2:1082 53.2:12627 60:2958 61.3:3392 61.3:2414 62.1:1543 64.2:210 69.2:1762 73.1:3876 75:16123 80.1:11572 81.9:2860 86.1:6813 87:1208 87.8:1951 90:1803 90.8:173 93:3318 94:1919 94.9:1936 95.8:2192 96.6:1462 102.3:1856 102.9:9087 104.8:1755 104.8:4462 107:2912 110.2:1257 112.4:2616 113.8:721 114.4:2604 116.1:4293 121.3:722 122.7:149 124.7:1169 126.2:733 128.7:4705 129.39999:866 133.7:2834 134.89…
Unknown	3688	16.1663	1288.96	[117.1]	117.1	57386.5	122142	483238	1.02853e+06			-1	-1	-1	-1	52.2:274 53.1:5357 56.2:3077 57.2:9503 58.8:10305 58.8:9224 60.9:1320 62:2621 67.1:5986 67.8:1612 69.3:1603 70:0 71:9765 71.8:3139 76:16304 77.1:2651 80.7:1 82:906 84.1:3934 87:1897 88.8:256 91.9:1 92.8:2746 93.8:8861 94.9:1029 96.1:1738 100.2:9163 100.7:8741 101.3:6295 103.8:7698 106:518 107.3:3924 108.9:1333 109.6:3074 112.1:1069 113.1:1260 116.3:15037 117.1:57387 118:7310 122.2:1568 122.9:864 …
Unknown	3690	16.1707	1289.14	[73.1]	73.1	82223.9	163907	578843	1.15388e+06			-1	-1	-1	-1	50.2:4195 51.3:3248 52.2:14650 54.1:6093 55.1:6334 55.1:5092 58.1:1264 58.9:10155 62.9:6107 65.1:3549 66.2:5786 73.1:82224 75:11658 76.1:16490 79.2:8644 80.9:5912 83:5262 84.2:4861 85.4:12231 87.5:3051 89.1:1073 92.1:2954 94.3:2557 95.8:1188 96.3:592 97.1:5384 97.9:3057 98.9:218 101.7:2233 103.1:9192 106.7:1301 108.7:2018 116.9:1387 119.3:5072 121:2053 121:1582 123.1:371 123.7:257 124.8:213 125.8…
Unknown	3697	16.1862	1289.78	[71.2]	71.2	24094.3	44557.2	389689	720645			-1	-1	-1	-1	50.2:5683 51.1:2774 53.3:14786 55:2623 56:4432 57.1:19731 58.1:2606 59.2:555 61.2:811 62.9:591 63.9:1500 66.1:2168 66.9:1898 69.2:6545 71.2:24094 73:1797 76.2:9183 77:1960 79.1:16130 81.4:0 83:4032 83.7:1807 85.1:12856 87.3:307 88.1:918 97.9:941 99.1:1689 101.9:3475 101.9:3140 105.1:4794 105.6:3715 106.8:3138 108.2:281 109.2:2191 110.2:243 111.2:3119 112.6:3604 113.1:2156 114:2558 115.8:10033 119…
Unknown	3703	16.1995	1290.32	[179.5]	179.5	6189.5	10612.5	257178	440957			-1	-1	-1	-1	50.2:4667 52.2:388 53.2:2492 54.2:2433 58.1:5380 60.1:1628 66:392 71.1:1801 71.9:4446 80.1:4362 84:3829 88.1:1655 92.2:2644 92.2:2690 93:1575 94:912 95.8:854 97.1:1506 97.9:2930 99:1152 100:1919 101.1:70 101.7:2389 103.8:2784 106.3:3905 106.3:1130 108.2:202 111:3377 112.5:641 114.7:993 117:1572 118.4:1788 124:421 125:423 126:682 128:268 129.2:4333 130.8:3227 132.60001:43 134.2:1915 134.2:1779 135…
Unknown	3722	16.2416	1292.04	[277.8]	277.2	2421.07	5036.96	384682	800318			-1	-1	-1	-1	50.3:2026 51.2:3386 53.3:1152 55.1:3499 56.2:4535 57:17797 58.1:2219 59.1:1179 60.3:541 61:2768 61.8:6757 62.9:735 62.9:4272 64.3:548 70.2:8005 71.4:14979 73.2:12513 75.1:3545 76.2:18245 77.1:9567 79.2:0 82:2586 83.1:6563 85:5191 86.9:2011 86.9:3288 88.1:2088 89.1:1361 90.2:569 91.2:0 91.2:813 91.9:3045 96:4551 96.9:1200 98.3:1633 98.3:1291 99.4:433 99.9:2191 101.2:2857 102.9:840 103.9:489 104.9:…
Unknown	3724	16.246	1292.23	[276.7]	277	6413.82	12263.9	330105	631197			-1	-1	-1	-1	52.2:3833 56.1:3331 60.6:3160 61.9:69 64.2:2122 64.2:8859 66.2:5963 66.2:5084 67.9:5004 69.1:2664 70.4:1686 74:7230 77.1:8207 80.2:6876 81.2:1671 83.2:3675 83.9:2839 85.1:7319 85.1:1860 86:1810 86.6:3003 93:1742 94.6:7961 94.6:6046 96:1907 97.1:1007 102.3:2283 103.9:283 104.8:1761 104.8:8408 106.8:188 108.7:2506 113.3:799 115.3:5210 118:2281 120.2:1472 122:1531 123.1:2229 126.4:1390 127:47 128.8:…
Unknown	3740	16.2814	1293.68	[164.2]	164.4	6997.84	7893.72	276456	311849			-1	-1	-1	-1	50.2:8575 53.2:3147 54.9:1359 60.1:102 62.1:1014 63:1105 65.1:8861 65.1:6307 66:4940 67:1972 67.7:7096 70.1:7003 71.1:2265 73:18103 75.1:10470 76:5801 77.1:780 80.2:12541 83.1:2069 85.1:2195 89:4051 89.8:5390 91:7159 91.9:1005 92.4:1860 94.7:164 96.8:1082 97.9:4475 99.1:821 103.1:3045 105:33 105.6:336 107.1:1745 109.8:48 113.9:1123 115.9:2636 117.5:177 119.6:1728 120.8:3095 124.1:1033 127.8:181 1…
Unknown	3757	16.3191	1295.22	[316]	316	3960.21	5111.87	220389	284480			-1	-1	-1	-1	50.2:132 59.7:2110 60.2:546 68:6065 73.1:4308 76.1:17072 77:15461 81.7:2297 82.3:3790 89.9:3012 90.6:1 92.3:2401 92.8:1819 93.3:1054 94.8:4108 94.8:2668 99.9:3246 101.1:243 105.1:5432 106.7:1935 107.4:1768 109.3:80 114.8:855 120:1709 120.8:2307 123.5:114 129.60001:659 137.89999:520 142.7:462 143.3:694 144:521 144.60001:1108 150.7:2454 152.7:882 154.2:2180 156.7:300 158.5:872 159.8:95 160.39999:75…
Unknown	3772	16.3523	1296.58	[73.1]	73.1	45761.3	87461.3	566441	1.08261e+06			-1	-1	-1	-1	52.2:637 53.2:17049 55.1:3975 56.1:2298 57.2:8147 59.2:8114 60.3:3478 62:2783 63:1523 64.3:2949 65.6:1181 66.2:952 67.1:5189 67.9:7602 69.2:6352 71.3:13298 73.1:45761 76.1:5435 77.1:3397 80.2:9901 81.1:566 83.1:4987 84.1:3921 84.8:9723 86:24743 86:23024 89:2984 90.5:5095 90.5:5154 92.3:6418 94.1:4409 95.3:7325 95.3:2594 96.3:148 96.9:1745 99.6:6412 100.2:725 100.8:4941 101.7:2346 104.7:2872 106:2…
Unknown	3773	16.3545	1296.67	[244.6]	244.9	56632.1	134182	467033	1.10657e+06			-1	-1	-1	-1	54.3:10892 56.2:8448 59.1:2660 61.1:1234 66:4753 66.7:8099 67.9:8578 69.2:6046 70.3:9611 73.1:44462 74.1:10374 83.2:7209 83.9:5229 85.8:18803 91.8:0 95.4:6344 100:18489 101:5931 101.6:6615 103:2397 107.9:1189 110.8:3850 115.1:7429 116:5175 121.8:711 126.2:2761 128.89999:1492 129.7:5486 132.2:915 132.89999:778 134:2062 142.8:455 143.7:4178 144.89999:2756 144.89999:3682 147.8:5570 151.8:1477 155.7:…
Unknown	3777	16.3634	1297.03	[56.9]	56.9	17819.9	22710.7	414980	528875			-1	-1	-1	-1	50.3:4654 51.3:7613 52.3:1 53.3:13312 54.3:3178 55:8013 55:8013 56.9:17820 56.9:17830 58.2:2844 59.3:11 61.3:1 64.1:579 66.9:886 68.2:3672 69.2:3203 70:9829 71.2:15880 73.2:1560 75.1:3865 78.1:19618 79.2:18875 83.1:3206 83.8:4756 84.3:7874 85.4:9222 86.2:2013 88.4:1235 89.1:5867 90.2:3541 92.1:4520 94.1:1280 95.1:2085 95.1:920 97.1:2142 98.3:1960 99.2:2623 101.7:2565 105.1:952 107.9:905 109:499 1…
Unknown	3794	16.401	1298.57	[56.2]	56.2	74014.6	56161.8	177118	134396			-1	-1	-1	-1	56.2:74015 64.2:2779 66.2:1753 70:18166 80.2:4798 137.2:1157 145:62 148.10001:1627 148.10001:5676 151.89999:2586 159:1331 181.2:713 181.7:395 197.5:3309 199.5:717 202.10001:625 205.60001:1300 210.5:163 211.2:47 220:641 220.89999:318 221.8:398 225.60001:9 225.60001:39 227.89999:274 232.7:137 236.89999:618 242.39999:782 242.89999:616 243.89999:1302 257.5:2 261.60001:901 271.5:393 286.29999:399 286.…
Unknown	3797	16.4077	1298.84	[197.5]	197.2	4109.19	5018.45	119409	145831			-1	-1	-1	-1	60:24 63:0 66.2:642 87.4:0 89.8:2109 94.1:992 104:475 121.9:473 128.89999:535 143.3:1578 147.89999:407 149.7:1051 151:1052 153:1895 163.8:0 164.39999:1447 165.3:1097 167:287 171.3:74 175.10001:479 180.39999:1850 181.3:1361 188.10001:225 189.2:910 191.7:15 195.8:596 195.8:35 197.2:4109 197.89999:2420 199.39999:176 202.60001:63 204.2:1366 206.7:1 206.7:5174 207.8:1661 210.5:178 211.3:424 212.89999:…
Unknown	3801	16.4165	1299.2	[479.6]	479.9	3909.39	6029.49	723213	1.11542e+06			-1	-1	-1	-1	57.2:28 60:962 61.9:1867 63.6:6416 64.3:7289 68.1:78764 72.3:177968 78.1:30911 82.2:106753 87.4:125 92.3:406 98.2:12251 101.1:361 109.3:1480 109.9:9603 111.2:54092 117.9:2150 120:1409 121.2:467 128.3:21611 129.10001:900 133.7:577 134.8:377 136.89999:1778 138:2269 148.10001:3219 155.2:6609 156.5:6563 160:1192 160.5:1058 162.3:2528 163.5:971 166.39999:1669 167.8:1281 169.89999:2887 172.2:507 176.7:…
Unknown	3805	16.4254	1299.57	[96.2]	96.2	56247.1	53751.7	1913047	1.82817e+06			-1	-1	-1	-1	53.2:12317 55.2:56148 57.2:1 58.3:130474 62.1:244 71.2:440540 74.1:15360 76.2:16186 82.2:111744 85.2:419000 87.3:5435 88:1325 92.2:15156 95.2:53327 96.2:56247 97.2:5113 98.2:17009 99.3:74381 100.3:1112 106.1:1692 112.2:54296 113.3:35258 119.9:5273 120.7:3667 121.6:2299 126.2:7311 127.3:30745 132.2:7841 136.5:963 136.5:2640 140.3:3790 144.2:1983 151.39999:1109 154.2:2417 157.39999:947 159.5:1617 1…
tridecane	3810	16.4365	1300.02	[57.2]	57.2	22095262	45652612	53915000	111397664	CCCCCCCCCCCCC	IIYFAKIEWZDVMP-UHFFFAOYSA-N	975.956	547.925	586.207	860.992	50.2:63098 51.3:107969 52.3:76280 53.2:47369 55.2:3980172 57.2:22095262 58.3:195676 59.3:29530 60.3:5451 61.3:6762 62.3:10701 63:2004 64:4370 65.2:99720 67.2:459030 69.2:2326436 71.2:10069507 72.3:637912 73:286130 77.1:66428 78.1:24125 79.2:239119 81.2:185234 83.2:1115469 85.2:4535906 88.9:15580 88.9:17595 91.1:31966 93.1:36994 93.9:17734 97.2:525393 98.2:1168522 99.3:1276857 100.3:98407 103.1:15…
tridecane	3811	16.4387	1300.12	[141.2]	141.3	482912	949288	23940758	47061764			-1	-1	-1	-1	50.3:59738 51.2:106225 52.3:72034 53.2:388257 55.2:257977 57.2:206 58.3:923365 61.2:6317 61.9:10575 63.2:9974 63.9:5783 65.2:42036 67.2:155841 69.2:170999 71.2:6714816 72.3:621960 74.3:26352 75:42119 76:12605 77.2:24067 79.1:175062 81.1:23133 82.3:485882 83.2:594625 85.2:5426260 87.4:6309 88.8:13427 90:3215 91.1:54190 92.9:33609 97.2:448324 98.2:565188 99.3:869655 100.4:96412 102.9:16250 104.1:98…
Unknown	3818	16.4542	1300.79	[173.8]	173.8	70286.4	162572	1.20276e+06	2.78197e+06			-1	-1	-1	-1	50.3:5151 51.3:30129 52.3:9496 53.3:4877 59.3:2184 60:155 61.1:611 63:635 64.1:318 66.1:3079 67.2:29691 68.2:103356 73:153567 75.1:5854 77.1:27444 79.2:31300 81.1:20484 89:21993 91.1:13754 94:1733 95.2:17128 101.3:3350 102:10189 103.1:13753 104.1:3775 105:12484 106.9:1425 107.5:3323 108.2:12775 109.1:5136 115.9:266 116.7:9105 117.4:7164 118.5:12316 120.1:2115 120.9:180 122.5:4605 123.6:4500 124.1…
5H-Cyclopropa[3.4]benz[1.2eļazulen-5-one, 2,9,9a-tris(acetyloxy)-3-{acetyloxy)methyl]-1,la,lb.2.4a,7a.7b,8,9,9a-decahydro(acetyloxy)methyl]-1,1a,1b,2,4a,7a,7b,8,9,9a-decahydro-4a,7b-dihydraxy-1,1,6,8tetramethyl-. [1aR-(laa, 1bß.2B,4aß.7aa,7ba 8a.B.9aa)}--	3820	16.4586	1300.99	[110.2]	110.2	27422.3	26414.5	4.67937e+06	4.50739e+06			-1	-1	-1	-1	50.3:11237 51.2:5088 52.2:24208 53.2:32730 55.2:371870 57.2:1311714 58.3:97974 60:1628 60.9:2331 60.9:6100 62:4568 62.9:6864 62.9:5930 63.4:4532 65.1:11304 66.2:20047 67.2:31283 69.2:157474 71.2:876302 72.4:17076 73.1:11273 75.1:20915 79.2:4880 81.1:12026 83.2:96432 85.2:437865 89.1:12001 89.1:10379 91:7558 93:13774 93.8:11901 95.3:20180 96.1:45765 97.1:61000 98.2:49336 99.3:87409 101.6:7446 101.…
Unknown	3826	16.4719	1301.57	[230.5]	230.5	4144.56	5256.74	331973	421056			-1	-1	-1	-1	54.2:16401 60:951 61.2:1279 65.7:5972 70.3:61597 76.2:12574 87.1:1365 88.8:2300 90.4:4341 92.1:2810 92.1:1705 96.2:7800 101.6:1137 110.2:1043 115.5:3368 118:3106 128.89999:5804 143.8:4698 146.8:66132 148.2:6565 149.8:103 150.39999:2270 157.3:52 160.5:291 162.2:732 166.39999:95 169.8:1590 174:12838 190.89999:3342 196.39999:189 197.8:504 198.60001:69 199.89999:1272 201.7:1163 202.60001:256 206.2:15…
Unknown	3835	16.4918	1302.44	[354.5]	354.2	1472.17	2148.01	208538	304275			-1	-1	-1	-1	54.3:547 56.1:7447 66.1:2728 70.2:23307 75.1:1 76:3499 86.2:3601 91.9:1550 93.8:6 93.8:3604 95.9:5251 99.4:12538 104.3:2333 104.3:2711 107.1:1703 109.5:2781 120.1:601 122.9:81 139.60001:306 142.3:839 151.10001:277 152.7:1736 156.39999:1831 158:2075 158.8:360 168.89999:0 175.5:931 176.5:401 177.89999:561 180.7:720 181.60001:1129 186.10001:2178 186.8:2880 186.8:1716 188.89999:445 189.7:750 190.5:54…
Unknown	3861	16.5494	1304.95	[138.6]	139	2883.8	1801.2	177817	111063			-1	-1	-1	-1	51.2:2614 52.2:6436 53.2:0 54.2:4588 58.3:1668 59.1:0 62.6:314 63.2:2978 64:660 65.1:2806 66:1639 67.2:0 68.3:1767 69.2:0 71:996 74.1:13883 79.1:13316 82:2468 83.1:0 84.2:1137 85.3:0 86.1:4671 88.9:0 91.1:588 94:2015 94.5:8817 96.7:0 97.3:0 99.1:1 100.3:1 103.1:1 104:1890 106.1:380 108:232 108.6:468 110.7:572 111.7:2426 114.5:6565 116:1537 117.1:1 119.9:4373 120.8:1389 121.7:270 123.9:1522 124.7:…
Unknown	3863	16.5538	1305.14	[124.4]	124.7	8881.88	15952.7	531904	955351			-1	-1	-1	-1	50.3:3079 52.2:1231 53.2:274 54.2:5415 55.2:3761 56.2:2050 58.2:16257 59.2:2300 60.4:10538 61.2:2025 61.8:0 64.4:2943 70.2:0 74:1062 75.1:7179 76.3:19587 77.1:2717 77.9:23601 80.1:15879 81.1:19192 82:3468 83:1037 87:6023 87:744 90.3:307 92.3:1618 93:3557 94:8972 94.9:3907 94.9:8367 97:3730 98.5:3344 100.9:3446 102.2:8433 105:244 106:898 107:3437 108:11370 108.9:5194 109.7:4379 110.9:7043 111.8:20…
Unknown	3873	16.5759	1306.11	[88.1]	88.1	17089.2	21271	732408	911630			-1	-1	-1	-1	50.4:3999 53.2:17352 59.2:6359 60.2:19414 61.2:2348 63.2:5649 64.1:12960 65.1:5400 68.2:15071 71.1:4053 75.1:31890 80.2:16596 81.2:12344 82.3:12901 88.1:17089 89.1:4823 90:6942 93:1575 95.1:7083 96:8971 97:4600 99.1:10859 102.1:28088 104.4:15937 104.4:3472 107.4:2494 108.1:7616 109:1904 110.1:7575 111.1:4293 115:75628 120.1:5292 124.9:977 126.1:4872 129.10001:76087 130.89999:6377 133.10001:8967 1…
2-Ketohexanoic acid, trimethylsilyl ester	3876	16.5826	1306.4	[73.1]	73.1	5.25832e+06	10611308	18265126	36859096			-1	-1	-1	-1	50.3:2020 51.2:58759 52.2:17895 53.2:8389 55.2:565593 56.3:50254 57.2:29530 58.2:167784 59.2:387382 61.2:237282 62.3:23253 64.1:1571 65.3:24823 66.1:3683 67.1:83705 73.1:5258318 75.1:2207985 76.2:72057 77.1:160517 80.2:17359 83:33632 83:35912 85.1:176562 86.1:19487 87.1:127162 93.1:26868 95.1:74581 97:10235 99:80197 101.1:326835 102.6:46724 103.1:57105 103.9:13216 105.1:23175 105.8:4749 107.4:336…
Unknown	3878	16.587	1306.6	[71.3]	71.3	63115	127295	1.37052e+06	2764162			-1	-1	-1	-1	51.2:69521 51.2:69521 52.2:1879 53.2:22295 55.2:19257 56.3:44745 57.1:92853 62.2:21609 63.1:18007 63.9:27450 65.1:10722 67.2:30699 68.1:17876 69.2:9579 70.1:34808 71.3:63115 79.1:9005 81.7:5336 85.2:60275 88.1:1036 89:45626 97.2:22057 99:27946 103:42716 105.7:5729 111.1:29053 117.1:61316 122.8:8701 135.3:153 137.10001:999 140.89999:14372 142.89999:40547 145:38766 152.39999:4306 152.39999:3999 157…
Unknown	3891	16.6158	1307.85	[118.1]	118.1	15908.1	13984.8	476189	418616			-1	-1	-1	-1	51.2:11089 52.2:2110 57.1:0 58.2:2033 59.1:4979 61.2:6055 64.1:852 64.6:2513 65.5:3113 67.2:5214 67.2:17226 68.3:1407 79.1:9999 85:3202 87.1:1622 88.1:565 91.3:7923 93.6:13655 95.9:2627 98.5:12414 99.1:1023 100:7713 106.1:3135 107.9:2300 113.9:4363 115.8:20878 117:33559 118.1:15908 118.8:13847 119.9:2772 121.6:2715 121.6:2288 123.9:563 129:1635 130.2:29357 132.2:656 139.5:1815 141:3569 143.10001:…
Unknown	3898	16.6313	1308.53	[208.5]	208.8	3694.53	8750.15	301561	714217			-1	-1	-1	-1	50.2:0 52.2:0 54.1:0 63.1:2076 64:845 65:1712 66:1285 66:5141 68.1:3499 70.1:7905 79.1:1 81.7:3762 82.3:4041 84.1:11426 89.1:6535 90.9:0 90.9:5869 92:3769 92.9:191 96.3:9157 97.1:473 98.1:1479 102.9:8227 103.7:3892 109.1:4268 109.1:6141 110.4:4414 111.7:2767 112.3:3785 120.3:1087 121:1587 132.8:89 136.89999:1500 137.5:1607 146.8:14144 147.89999:1647 148.8:7567 149.7:2594 150.60001:4006 152.10001:…
Unknown	3900	16.6358	1308.72	[147.9]	147.9	74440.1	63060.5	591867	501388			-1	-1	-1	-1	53.2:8924 55.2:11953 56.1:6379 57.1:2326 57.1:0 59.1:955 61.2:2443 62.7:321 62.7:2235 64.3:2065 67.1:0 67.9:1492 70.4:4265 71:4426 73.1:100689 75.1:51668 77.1:10218 81.1:2565 84:6534 85.1:1008 85.9:5725 86.7:0 88:3757 91.7:5273 94.7:4039 97.3:2437 98.4:291 98.9:514 101.1:6273 102:1286 104.4:5880 105:4484 108.2:1125 108.9:1667 110.1:1954 112.9:5679 114:482 115:0 115:10034 117:1 118.1:3092 119.9:10…
Succinic acid; GC-EI-TOF; MS; 2 TMS; BP	3904	16.6446	1309.11	[146.9]	146.9	741991	1.54018e+06	1749371	3.63123e+06	OC(=O)CCC(O)=O	KDYFGRWQOYBRFD-UHFFFAOYSA-N	827.792	813.027	774.193	873.997	50.3:3713 51.3:2075 52.2:8444 55.2:26389 58.2:12696 58.2:0 59.1:1 60.2:7155 61.1:10064 62.8:1863 64.2:2021 66.2:13407 67.2:1616 69.2:11135 69.8:20241 69.8:7500 73.1:169576 75.1:107345 77.1:10504 79.1:5786 80.2:24363 81.1:5323 82.2:6472 83:571 86.2:5500 86.9:1017 87.6:884 89.1:4007 94.1:3432 94.7:469 94.7:4396 96.8:6506 98.9:0 99.6:9925 99.6:8135 101.1:5158 103:3454 104:5294 104:395 104.8:592 107.…
Unknown	3906	16.649	1309.3	[157.3]	157.7	0.955078	1.49884	752736	1.1813e+06			-1	-1	-1	-1	50.4:5402 52.2:8600 55.3:25002 56.2:14831 57.2:2546 58.3:2738 59:0 60.1:5919 61.2:9649 63.1:2255 64.2:1518 66.1:4107 66.9:10090 69.2:786 70.3:14012 71.1:2175 73.1:157616 75.1:119929 76.1:6649 77.2:11546 80.1:5511 81.3:3579 83:118 84.8:14575 87.1:1633 89:4810 89:5381 92:5550 94.7:1336 94.7:16734 97:4654 99.4:3751 99.4:4511 101.1:4533 102.5:7414 103.1:889 105.1:1179 107.9:0 110:3330 110.9:2768 110.…
Unknown	3907	16.6513	1309.4	[75.1]	75.1	124396	247318	1.01322e+06	2.01444e+06			-1	-1	-1	-1	50.3:402 51.2:2423 54.2:10064 55.2:24122 56.1:18873 57.1:11932 58.2:856 59.1:0 60.1:3495 61.2:8437 63.1:1581 65.2:2624 66.2:11375 67.1:6208 68.2:1448 69.3:19949 70.1:11451 71.1:10000 73.1:145619 75.1:124396 77.1:11362 78.1:30129 79.1:14022 82:375 83.1:8497 84:14860 85.1:4525 86:4115 86.7:3263 87.4:1 88.9:1864 91:3331 92.9:7739 94.7:1288 95.3:0 96.4:1020 97.3:5199 98.8:0 101.2:2286 103:8590 104.4:…
Unknown	3916	16.6712	1310.27	[173.6]	173.8	24944.9	49586.8	355577	706834			-1	-1	-1	-1	51.2:5892 53.3:6136 54.1:7757 56.3:15337 59:0 62.9:4243 62.9:7019 67.9:4795 70.6:13796 71.1:10566 71.7:2527 81.2:1669 83.2:544 84.1:5623 85.1:1 88:953 90.1:2337 91.7:5419 94.2:2421 96.6:827 100.8:0 103.9:2916 105:1479 108.9:1012 110.2:4019 111:223 111:13681 112.6:3567 113.8:5180 122.2:467 123:2167 125.5:496 127.6:3638 137.8:2096 139:444 140.8:11 148.7:0 150.89999:1984 153:3560 154.2:3845 154.8:20…
Unknown	3918	16.6756	1310.46	[170.6]	170.5	8511.95	18271.1	367225	788256			-1	-1	-1	-1	51.2:2398 52.2:8459 53.2:1177 54.1:2605 57.1:11141 60.2:5743 65.1:3736 65.9:0 65.9:283 67.1:0 68.3:6800 69:2811 70.1:2049 75.1:1 76.2:28087 79.1:0 80.9:8584 83.1:9873 84.3:12496 84.3:12325 86.1:2508 87:1903 89:1 90.1:84 91.2:2929 93.1:2270 95.9:2880 100:1 101.2:0 102.9:0 103.9:733 105.9:1631 105.9:1974 106.9:2065 107.9:485 108.9:603 111:1811 113.4:365 114.6:1351 117.1:0 118:966 119.1:2901 120.1:1…
Unknown	3950	16.7465	1313.56	[123.8]	123.9	4947.57	8284.24	725086	1.21409e+06			-1	-1	-1	-1	50.2:58 51.2:4808 53.2:7438 54.3:5247 55.4:1323 56.2:3155 57.3:1455 58:6225 59.2:0 62.7:1754 63.3:596 64.3:2082 66.1:2073 67.1:1501 68.2:856 69.4:5560 69.4:5560 70.2:0 71:696 73.1:1989 75.1:2212 76.1:4981 77:1 80.6:12206 81.3:1 81.3:4565 83:836 83.9:608 85:1 86.9:2167 86.9:2522 87.9:1954 89.1:0 89.9:14 91:816 91.6:2093 94.7:5595 95.9:1542 97.7:295 98.2:5086 99.1:2465 99.7:0 101.2:3717 102:1 103.2…
Unknown	3952	16.7509	1313.75	[201]	201	6820.59	13043.5	329682	630474			-1	-1	-1	-1	52.3:7575 54.3:6064 56.9:0 57.7:9989 58.3:3550 59.6:2423 60.9:1 63:3306 64.1:689 65:68 67.2:1369 68.3:3017 71.1:1 73.9:10165 79.2:8251 80.1:3300 80.9:11991 81.9:2556 84.9:0 86.1:1428 86.8:1670 88.7:1 89.5:2445 90.9:968 93:3923 93:2955 94.2:2699 94.8:6166 95.6:3548 101:1 105:524 107:3635 107.8:7163 108.8:1922 108.8:0 109.9:2390 110.9:4297 111.7:3800 111.7:5363 114.2:791 114.9:220 115.8:5515 116.7:…
Unknown	3972	16.7952	1315.68	[191.8]	191.8	6366.15	3419.37	632604	339782			-1	-1	-1	-1	52.2:2869 53.1:5688 55.2:5625 57:6500 57:15632 59.1:4547 62.2:136 64.2:2563 67.2:3190 68.2:917 69.2:3673 70.2:6763 71.4:4415 75.1:5400 76.1:6629 77:2169 79.1:4436 81.1:5206 81.8:7466 84.1:2514 85.1:3893 87:2634 87:6968 89.1:11860 90:1523 91.1:1139 92:3578 93.2:3411 94.2:606 94.9:202 95.5:9277 97:1379 98.5:1443 99.1:4130 100.1:8630 100.1:12209 101.8:7096 103.1:1608 103.8:2690 104.4:702 105.4:3429 …
Unknown	3977	16.8062	1316.17	[193]	193	74361.1	149639	2032304	4089660			-1	-1	-1	-1	50.3:4417 53.3:20502 54.2:5150 56:12967 57.2:5907 61.2:6523 61.2:15138 63.1:9338 69.2:39233 70.2:19039 71.1:22576 75.1:23733 76.2:19060 77.1:16745 80.4:8576 81.2:9367 83.1:5243 89.2:36875 90.2:3130 91.1:11439 92:8329 93:11961 94.2:6477 94.9:874 95.8:1 95.8:15630 99.1:10754 100:30910 100.9:7710 105.6:207 106.6:641 108.6:4315 113.1:9829 115:7222 115.7:4742 117.4:12952 118.8:12926 119.3:9704 120.1:9…
Strychnidin-10-one, 2,3-dimethoxy-, 19-oxide	3979	16.8107	1316.36	[73.1]	73.1	1615945	3367889	5518982	11502444			-1	-1	-1	-1	50.3:11127 51.2:6896 59.2:40245 65.1:3517 66.2:4115 67.3:2451 68.1:8865 69.2:32499 71.7:14138 73.1:1615945 75.1:41644 77.2:115106 77.9:28714 79.2:20554 80.2:11998 81.1:0 82.1:4666 83:3177 85.1:17066 86.8:14040 89:5286 90.2:4882 93.2:8043 95.4:5511 96:11960 97.1:2248 98.5:2040 99.9:14352 101:5144 101.6:8265 103:7387 103.8:16230 105.1:5120 105.9:3586 107.9:1341 109.2:1209 109.9:4619 110.9:4918 111.…
Unknown	3984	16.8218	1316.85	[393.5]	393.5	38253.1	32508.8	577720	490967			-1	-1	-1	-1	50.3:109 53.2:11503 54:5947 54:7345 58.2:2158 61.1:1488 63.1:2621 63.8:3834 65.3:198 66.9:1571 73.1:0 75.1:1645 77.1:10514 79.1:1892 86.4:4573 87.1:10146 87.9:1296 95:1192 100:4673 100.6:4206 103:1885 104.9:3164 105.6:1449 107.2:2875 110.3:2967 114.8:483 118.1:2124 120.1:429 124.5:500 125.8:4782 133:2389 134.7:1173 136.60001:2884 139.39999:536 140:289 142.5:90 143.10001:935 146.89999:603 152.6000…
Unknown	3986	16.8262	1317.04	[192.4]	192.7	11668.4	4499.42	331269	127740			-1	-1	-1	-1	51.2:2676 52.2:727 53.2:22780 54.1:1236 56.2:3053 60.2:1489 61.1:3521 62.9:998 70.2:2631 70.9:2396 75.1:2411 77:1778 80.1:1780 85.8:126 88.9:490 90.1:138 92.9:0 103.8:2196 107.2:1931 107.2:17 108.4:179 113.3:283 114.9:916 115.8:2107 117.2:369 120.1:1209 122:551 122.8:14 127.1:988 127.8:1224 128.8:900 129.8:0 133.8:1942 134.60001:410 136.10001:1527 136.7:899 136.7:973 143:1154 146.89999:757 148:32…
Unknown	3992	16.8395	1317.62	[207.6]	207.9	23502.3	20526.3	177713	155209			-1	-1	-1	-1	51.2:3665 52.2:4032 54.2:4413 63.7:372 68:602 76.3:13596 78.2:14904 81:148 82.2:3073 83.2:564 83.9:1843 84.7:6109 91.8:1324 94.1:517 99.1:618 104.8:1207 107.8:259 108.5:418 111.2:1955 112.8:518 113.4:174 115.7:3724 118.4:2917 125.8:1975 127.5:688 135.2:1 138:465 138:2006 140.3:1533 141.8:1127 147.89999:2514 153.60001:1575 158.10001:55 161.3:146 161.3:894 164.10001:0 171.39999:168 183.60001:545 18…
Unknown	4014	16.8882	1319.75	[279.8]	279.5	2943.6	3739.77	337843	429221			-1	-1	-1	-1	50.4:1873 52.2:3003 54.6:13360 55.3:1 57.1:1 59.2:2462 59.2:4347 60.3:1595 61.2:720 61.9:3992 67.1:3857 71.7:0 73.1:1 73.9:15773 75.1:1771 77:6151 78:21144 80.2:7338 81.1:7635 82.2:857 83.9:0 85:2084 85.9:271 87.1:628 90.8:4102 92.9:4479 95.6:1 98.7:0 99.7:1808 103.3:5403 103.3:2911 104:0 104.9:2741 106.2:1599 106.9:1149 107.7:3506 108.9:2445 111:0 111.6:726 112.9:2485 114.1:1617 115.3:2282 115.3…
Unknown	4015	16.8904	1319.84	[277.8]	278.2	3304.91	5758.77	314634	548248			-1	-1	-1	-1	50.3:1555 51.3:1841 52.2:7392 53.2:10645 54.2:281 55.8:1733 57.2:1 57.9:5547 61.4:514 62.1:1990 63:1301 64:1 65.2:1717 66.1:3478 67.2:9172 69.3:6916 70.1:1550 71:0 72.2:2781 75.2:3092 76:0 77.1:2668 79.2:13742 81:6521 82.8:0 83.9:1 85:0 85.9:5655 87:0 87.6:1281 89.9:2387 91:281 93:266 94.2:1844 94.9:1 95.8:1149 96.9:1 101.2:310 102:0 102.9:1940 104.9:2267 104.9:5280 105.8:744 106.6:2347 107.5:289…
Unknown	4017	16.8948	1320.04	[195.9]	195.9	42714.1	86971.7	417987	851078			-1	-1	-1	-1	53.2:2787 58.2:348 58.2:3312 60.3:2571 63:4025 64.9:1247 65.5:9130 66.4:7641 75:3044 77.2:110 81.1:10398 83.3:2974 86:5537 94.3:1475 94.9:1 101:4956 102.1:2836 104:0 107.5:1335 108:4075 114.9:1637 115.9:2005 118.2:1352 118.2:5248 119.1:3551 120.4:3522 120.4:4856 122:2008 124:812 124.7:700 126.2:1787 128.5:1454 129.10001:1488 129.10001:6226 135.8:979 135.8:1733 138.2:3568 144.10001:1597 144.89999:…
Unknown	4020	16.9015	1320.33	[341.6]	341.8	2983.52	4753.64	303861	484142			-1	-1	-1	-1	52.2:3127 54:4952 54:1042 56.1:3942 57.1:1 58.2:2265 61.2:2769 63.1:1651 63.9:2705 66.1:1272 70.1:2558 71.1:1 74:9048 75:2279 79.1:17712 81:7148 82.1:3356 84.4:1135 85.8:5897 86.9:1918 88.7:2303 89.4:3945 91.8:628 92.5:8264 93.2:1536 93.8:3812 94.9:738 96.8:1 98.1:1357 99.8:2958 100.4:2972 101.9:2279 104.8:184 105.8:4079 107:419 108:883 108.7:1851 109.9:1762 111.4:1253 112.5:590 112.5:816 113.1:1…
Unknown	4026	16.9148	1320.91	[204.7]	204.7	16097.4	30092.9	439284	821208			-1	-1	-1	-1	50.3:1054 51.2:2870 56.3:8995 63.3:2679 66.7:5244 68.2:4388 69.1:7601 70.1:1 80.2:13085 81:6765 83.1:8518 84:2962 87.8:1566 89.8:7829 91.7:4856 94:4075 96:2310 97.1:192 99.6:1345 100.8:1165 102.6:4487 103.2:4093 103.9:4121 106.4:2594 106.9:0 107.7:1397 110.7:5608 111.7:6070 113.8:5747 114.7:3818 116:210 117.2:1269 117.8:2194 120:1977 120.9:2518 125.3:2073 128.5:5346 129.8:3342 131.10001:9720 132.…
Unknown	4032	16.928	1321.49	[73.2]	73.2	94712	221947	978799	2.2937e+06			-1	-1	-1	-1	50.2:5004 52.2:5642 53.1:23274 54.2:5551 55.2:17381 59.1:13912 61.8:4711 64:2153 64.9:3139 66:4091 67.4:6019 68.2:14081 69.3:29886 70.4:31675 71.2:10781 73.2:94712 75.1:26205 76.1:13654 77.1:12501 80.7:20802 82.2:52522 84:25988 85.2:67422 86.3:1835 87.6:393 88.9:18394 90.9:3577 91.9:2794 93:8622 95.1:3938 96:5757 97.1:130 97.9:2805 99.1:19192 101:3189 102.2:2163 103:2965 104.5:629 104.5:3004 105.…
Unknown	4033	16.9303	1321.58	[69]	69	33763.3	51853.7	743606	1.14203e+06			-1	-1	-1	-1	50.2:10367 51.3:12768 56.2:1521 57.2:19672 58.2:6993 59.1:2863 61.1:3736 62:4088 64:1572 64:9073 65.1:1821 65.8:6792 68.1:16011 69:33763 69:33763 70.2:27695 73.1:93774 75.1:19470 77.2:10031 79.1:15932 81.1:7786 82.1:9576 83.3:7742 84.3:28047 87.3:568 90.5:4394 91.9:10898 93:7976 94.2:1976 95.1:2009 95.8:7096 96.9:6545 98.8:3651 100.3:0 101.7:468 103:1825 103.9:2962 104.9:217 106:1153 106:1901 108…
Unknown	4036	16.9369	1321.87	[71.2]	71.2	137074	308425	886132	1.99385e+06			-1	-1	-1	-1	52.2:12029 53.2:17884 54.1:4812 55.1:20809 57.2:103673 58.5:914 60:3549 60.7:2954 63:1956 65.2:4933 65.2:3654 66:469 67.1:3602 71.2:137074 73.1:27144 76.2:17521 78.1:30464 79.1:19464 80.4:11901 82.9:14164 85.1:89597 86.4:5101 88:624 89:14831 91.1:6625 91.1:9661 97.6:3049 98.2:6374 99:13410 103.7:3729 108.1:2068 108.9:643 109.9:169 112.3:14943 113.1:17699 114.7:812 116.1:4498 121.7:3053 124.7:2561…
Unknown	4045	16.9568	1322.74	[220.7]	220.5	4628.88	8738.34	282555	533404			-1	-1	-1	-1	51.3:2252 57.2:19890 58.6:3524 61.9:3766 62.5:1777 64.1:1359 65.1:258 66.9:2930 66.9:7731 68.2:5157 69.2:7024 69.9:14132 71.3:6240 75.1:11218 77:3979 84.1:7526 85.1:2959 86.8:207 93:2560 93.9:1618 95.1:3010 95.8:3538 96.6:4185 97.4:1264 103:2260 103.8:2279 106.9:3356 108.8:4 110:1 112.1:1046 117.7:1413 117.7:4536 119.7:2891 120.8:1263 123:4331 124.7:2999 126.3:3772 134.60001:1153 135.39999:244 13…
Unknown	4059	16.9878	1324.1	[291.4]	291.4	1088.73	155.402	135306	19313.1			-1	-1	-1	-1	51.2:184 52.2:7967 54.8:1491 54.8:803 55.8:1461 57.1:3019 62.4:952 71.2:2766 76:3087 77.1:1306 80.2:3192 81:135 84:1449 85.1:1559 90.9:127 96:983 98:119 99.1:458 100.9:341 102:1680 103:1839 103.9:2203 105:111 107.1:746 110.5:1115 111.1:1610 113.1:519 113.1:1202 114:580 116.1:291 118.8:116 123.7:211 126.6:67 127.3:263 129.2:1586 129.7:64 130.39999:2861 132.89999:248 134.5:1619 135.5:428 148.39999:…
Unknown	4064	16.9989	1324.58	[291.8]	291.8	15639.3	32828.2	341822	717513			-1	-1	-1	-1	50.3:10445 52.2:2777 53.3:25293 63.1:6708 77.1:4615 80.1:894 86.9:1897 93.1:2810 93.9:1 94.6:3643 95.9:1 101:3615 101.9:11068 102.8:14563 113.9:773 116.8:9780 118.5:9655 119.6:7567 125.3:2384 129.8:1204 129.8:7627 131.5:985 132.8:19057 133.8:1501 135.60001:2741 136.60001:289 137.10001:2588 138:0 144.2:1699 148.3:1306 158.5:3596 160.5:2189 163.89999:1012 167.2:4488 174.60001:2703 175.2:4202 178.3:…
Unknown	4065	17.0011	1324.68	[73.1]	73.1	84595.2	181230	657618	1.40883e+06			-1	-1	-1	-1	51.3:5890 52.3:4647 53.2:8110 54.9:1 56.3:2045 57.3:1 58.2:4547 59.2:10108 60.1:2121 60.9:2707 63.1:174 64:3107 64.9:2388 65.8:2979 66.5:1 67.1:4180 67.9:2090 69.1:1027 71:0 73.1:84595 75.1:9412 79.1:12543 80.9:6165 81.6:2656 82.9:1523 84.1:3688 85.1:1 86.1:2721 88.2:3814 89:7070 90:0 91.7:575 97:489 98.6:2421 99.9:14508 102.4:3153 103:12545 103.6:3904 104.5:5194 105.7:2999 105.7:6550 106.2:4197 …
Unknown	4068	17.0078	1324.97	[174]	174	42628.9	105516	583757	1.44493e+06			-1	-1	-1	-1	50.2:10197 51.2:2662 54.2:4905 55.1:1 56.5:6649 57.1:1 59.1:1221 60.1:4038 61.1:2576 64.4:3848 66.6:6591 68.2:5657 69.2:6878 71.2:0 73.2:7122 73.9:18321 75.1:16759 78.2:17781 79.1:16306 80.2:8325 81.1:1042 81.9:1099 83.3:3689 83.9:1600 84.7:1425 86.1:7027 86.8:2579 88:1935 89:10203 90.7:3018 91.8:1 92.8:11582 97:754 97.9:1 98.8:4933 99.9:17235 101.7:13711 101.7:15403 102.8:7700 104:73 105.6:7805 …
Unknown	4074	17.021	1325.55	[167.9]	167.9	69332.9	140700	513127	1.04131e+06			-1	-1	-1	-1	52.2:2457 55.9:7826 55.9:10020 61.1:225 62.3:2906 65.9:1128 75.1:12950 78.2:10073 80.2:15953 82:125 83.7:833 88:1155 89.1:4443 90.9:2701 92.3:8631 95.8:2394 96.9:995 99.8:836 100.8:4936 106.7:534 107.9:3051 110.1:0 111:2464 113:1300 115.9:3124 118.1:0 123.8:1312 124.5:956 125.4:3039 125.4:6934 127.6:2797 129.89999:9989 130.89999:4588 132.2:3015 132.7:6810 133.5:7785 134.3:5396 138.60001:809 140.7…
Unknown	4076	17.0255	1325.74	[227.2]	227.2	28529.3	52854.2	607651	1125751			-1	-1	-1	-1	52.2:2312 54.8:468 55.3:4014 56.3:7319 57.3:0 59.1:6456 60.9:2119 61.9:959 63.9:593 65:5666 68.1:5007 69.2:2636 70:2740 70.8:5042 71.7:3338 73:20620 74.1:3516 77:0 80.1:12940 82.1:117 83.1:2581 84.2:0 84.9:2939 87.1:0 90.2:2378 91.1:3892 91.9:11691 93:3472 93.7:2067 95.9:3587 97.2:2901 98:1963 99.4:20 101:2342 102:2893 103.1:6879 105.1:1636 105.7:7839 106.3:4702 106.3:134 111.1:1787 112.6:1606 11…
Unknown	4079	17.0321	1326.03	[183.9]	183.9	12923.7	30661.7	483187	1146369			-1	-1	-1	-1	51.3:1129 52.2:1598 53.2:17105 58.1:5603 58.9:5415 61:803 63:2794 63.8:2820 65:2273 66:5738 67.3:2687 69.2:3156 70.2:9444 71.9:4734 73:10987 76:18310 81.3:4146 82.2:657 83.8:1 85.1:3056 85.8:10652 87.6:689 90.8:1360 92.9:5742 93.6:14579 94.3:4711 94.9:664 96.5:370 98:2460 98.8:2570 99.9:7887 102.1:4728 103:3263 104.3:449 106.1:4589 108:3621 108.5:6171 109.4:1847 110.7:907 110.7:158 114.6:3635 115…
Unknown	4105	17.0897	1328.55	[269.8]	269.8	7767.59	11438.8	341584	503028			-1	-1	-1	-1	50.3:6689 54.3:5552 55.2:868 62.3:6776 64.2:5061 66:1765 70.1:1163 79.1:3203 82:4175 82.9:1809 88.9:2282 90.3:1083 92:1714 94.2:2206 94.8:3425 96:457 98.3:2827 99.7:1159 103:980 103.6:2103 107.1:1181 107.7:2477 110.8:1664 111.3:78 112.4:322 114.6:5318 116.3:1975 117:5919 119.9:999 121.6:1092 122.6:3778 124.8:2500 127.5:627 129:0 133:10994 135.5:983 138:1573 139.7:1850 140.8:471 143.7:2574 144.5:3…
Unknown	4109	17.0985	1328.93	[297.7]	297.7	201956	438284	1.26779e+06	2751360			-1	-1	-1	-1	51.3:2808 52.2:6671 53.2:18547 56.2:7043 57.2:7260 58.3:13747 59.1:8442 61:138 61.6:5219 63.3:2934 65:4276 67.1:487 68:3882 69.2:5054 70.9:2569 73:110743 76.1:25179 77:9749 80.1:11232 81.1:4128 84.1:4450 86:6393 87:5718 90.1:3229 90.1:3547 93:13247 94.9:1889 96.1:4453 96.9:3631 97.7:1155 98.8:2257 99.5:1463 99.5:2039 102.8:837 104.8:3389 105.9:538 106.6:2181 108.4:1738 110:3279 112.8:443 113.7:16…
Unknown	4122	17.1273	1330.19	[189.9]	190.1	9139.53	23901.2	268971	703397			-1	-1	-1	-1	51.2:9327 53.2:16 54.2:884 55.1:4481 56.2:1716 61:1846 62.2:2744 63.1:119 64:1580 65.9:669 65.9:3663 75.1:7698 78.1:7866 80.1:6177 87.8:2315 92:2740 95.9:466 97.8:131 101.1:2956 101.9:2315 102.6:4327 103.9:5500 107:204 109.8:0 110.7:952 110.7:1031 114.7:3445 115.9:2587 117.7:239 118.7:146 119.9:4797 119.9:4694 122.6:2107 128.8:2752 130.7:3351 133.10001:12111 135.5:71 140.89999:1295 142.89999:2141…
Unknown	4133	17.1517	1331.25	[113.1]	112.9	4003.23	2845.61	267873	190412			-1	-1	-1	-1	51.3:7738 52.3:2139 53.2:8784 54.1:7825 56.1:972 57.1:151 58.3:5804 59.1:62 64.8:1826 66.2:1137 66.2:502 67.7:3678 67.7:2984 69.4:13708 69.4:13264 80.3:10801 83:2670 83:5953 84.3:6589 84.9:3626 91.1:811 91.8:463 95.2:3443 96.2:0 99.1:3584 100.4:770 101:3470 101.8:2496 103:12 104.1:1547 105.1:97 105.8:1283 106.7:1143 107.5:105 108.6:98 111.1:805 111.8:1459 112.9:4003 112.9:6490 114:1368 118.1:1599…
Unknown	4136	17.1583	1331.54	[71.1]	71.1	19512.1	46293.4	249704	592437			-1	-1	-1	-1	50.2:1146 52.2:193 53.2:551 55.1:7155 56.1:473 57.3:11543 58.9:2599 61.1:1557 62.5:486 63.4:826 64.1:1 65:4996 66.1:796 67.9:2823 69.1:3722 70.2:2879 71.1:19512 74:13264 77.1:5013 79.1:9062 81:1650 84.4:14080 84.4:4675 85.1:3188 86.4:3753 92:1194 98.9:6907 101.8:863 106.1:710 107.8:1308 111:1552 111.9:2026 116.2:420 117:2773 118.9:2344 120.1:163 122.8:575 124.8:2258 124.8:616 125.9:1661 127.1:129…
Unknown	4142	17.1716	1332.12	[254.6]	255	14628.8	26283.3	323615	581434			-1	-1	-1	-1	51.2:4279 52.2:3475 53.3:1925 54.6:5368 57:8048 58.3:1739 60.2:2733 62.6:6 66.1:2429 70.2:3205 71.1:6820 76.1:9897 77:3634 79.1:4016 82.9:1331 83.7:6334 84.3:5077 85.3:2833 86.6:1207 88.4:1936 90.1:33 91.1:1821 93:1047 96:125 97.1:0 97.9:2244 99:10672 99.9:2466 104.3:3763 105:552 107.2:3068 108.7:323 110.8:1236 113.2:9913 113.2:7358 115.7:227 117.1:72 118.3:1250 118.9:387 120.1:169 122:2902 123.3…
Unknown	4148	17.1849	1332.7	[255.6]	255.2	2759.52	2494.12	281386	254324			-1	-1	-1	-1	50.3:3297 51.2:3906 52.2:9981 53.2:5472 54.1:4121 56.2:4352 57.1:8641 61.1:16 62.9:546 64.7:742 66.3:1803 67:3102 69.2:4856 70.3:2258 71.1:6322 75:13914 80.1:4720 80.9:223 81.8:2074 82.4:1086 82.9:2184 84:1561 84.9:2469 85.6:1516 88.9:277 92:1640 93.8:1198 94.9:1000 96.9:5997 98.9:5796 106.9:166 112.4:3221 113.2:2498 114:544 115.1:1329 121.6:276 123.7:94 125.7:1236 125.7:954 127.1:1361 128.8:357 …
Unknown	4154	17.1982	1333.29	[338.6]	338.7	11487.1	16340	415457	590971			-1	-1	-1	-1	51.2:2582 52.2:10464 56:1056 64.3:1403 64.9:102 66:2019 70.3:6311 71.3:3993 73:19455 75.1:740 80.9:6819 81.7:505 84.1:55 85.1:1399 86.3:1663 88.4:4491 88.9:1695 88.9:287 90.2:3217 94.4:6093 97.1:2104 97.7:2218 102.8:1691 102.8:2135 105.2:112 106.2:640 107.1:304 111.9:1113 111.9:4578 114.5:1059 114.5:2497 116.2:2632 116.9:104 116.9:8657 117.9:3049 118.8:1505 120.2:2002 121:1401 121.7:1303 122.6:35…
Unknown	4159	17.2093	1333.77	[221.2]	221.2	24150.8	38680.3	685131	1.09732e+06			-1	-1	-1	-1	50.4:9423 51.2:35 53.3:9931 55.1:7023 57.2:5142 58.1:2895 59.1:8203 60:2411 61.2:1476 62.2:769 62.2:1108 63.2:1600 64.2:1588 64.2:1117 65.1:205 67:1635 68:1788 68:8979 69.2:4021 71.1:0 73.1:60109 75.1:4669 78:4696 79.1:9416 80.1:18029 83.4:3825 84.3:1881 84.9:2401 89:5669 92.1:4486 92.9:1048 95:1809 97.1:883 99.3:4089 101.1:509 103.1:389 104.8:2224 106.8:59 107.9:253 110.3:2470 110.9:1887 113:346…
Unknown	4163	17.2181	1334.15	[204.8]	204.6	13593.2	27107.3	478698	954612			-1	-1	-1	-1	50.3:5601 54.1:1234 56:1391 56:2755 59:1867 60.1:677 62.2:347 62.9:190 65.9:4894 67.1:1044 68:805 71.8:2548 78:17336 85:10453 87.1:2663 89:4440 90.9:2830 92.3:6729 92.3:2443 93:4303 94:1556 97.9:2895 102.9:2022 104.7:2938 106.1:1216 109.6:336 113.9:1275 115.1:2666 116.1:2952 118.9:673 120.3:1702 120.3:1446 122.6:1293 123.9:745 135.8:301 137.60001:155 139.60001:73 140.3:1199 141:59 142.2:1067 146.…
Unknown	4199	17.2979	1337.64	[75.1]	75.1	66571.2	145069	728322	1.58713e+06			-1	-1	-1	-1	51.2:7253 53.2:0 55.3:19740 56.1:0 59.2:8181 61.1:99 62.3:2612 66.1:139 67.2:5982 67.8:4912 69.2:3301 70.2:3625 73.1:4 75.1:66571 77:6677 78.1:20235 79.1:2678 80.2:17857 82.6:2331 85.1:12402 88.2:2363 89.2:4321 91.2:1038 91.9:4343 93.1:5569 95.7:1435 98.2:570 99.1:2290 101:9022 102:10357 102.8:7642 107.7:336 109.3:3124 113.2:3496 113.2:4863 115:13913 115.9:11678 117:80394 118.3:11673 121.4:1612 1…
Unknown	4201	17.3023	1337.83	[73.1]	73.1	307258	768835	1.31855e+06	3.29935e+06			-1	-1	-1	-1	50.4:3634 51.2:4914 52.3:15562 55.3:27048 57.2:4981 58:6211 59.2:25142 60.2:1098 61.2:14506 63:4230 71.1:7933 71.1:3991 73.1:307258 75.1:80337 76.1:21386 77:11552 79.1:21327 80.1:21455 81:4468 82.1:4107 83.1:4981 84.1:1 85.1:12022 86.2:3540 87.3:7105 89:5851 89:3969 92.9:2740 94.5:7702 97:6683 99.1:6990 100:4162 101:21308 103.1:1850 103.8:5924 105:2660 105.7:1350 107.2:327 108.8:3273 109.8:3014 1…
Unknown	4207	17.3156	1338.41	[203.8]	203.8	8337.06	13745	285325	470405			-1	-1	-1	-1	50.2:4077 52.2:5754 53.2:3841 54.1:1198 55.2:1541 56.1:2888 57.4:1772 58.2:918 59.1:963 60:140 61:3363 61.9:1416 63.1:1213 66.2:2122 66.9:265 68.3:460 69.4:1994 70.2:514 71.8:291 73.1:80 75.1:1557 76.1:6228 83:728 83.9:217 84.4:2266 88.7:2283 89.8:1274 90.8:2571 93.2:2258 94.3:1068 95.1:1629 95.8:2553 96.9:1734 97.5:3994 99.9:1 102.8:3463 104.8:1032 106:4296 106:2344 107.2:1519 107.2:918 108.1:72…
Unknown	4209	17.32	1338.6	[80.1]	80.1	56819.5	43806.1	409610	315797			-1	-1	-1	-1	52.2:5 53.3:286 55.2:2493 58:6250 59:912 64.2:757 66:709 66.9:966 73.1:1461 75.1:17908 76:13426 77.1:6023 79.2:13211 80.1:56819 80.9:4987 84.1:923 85.9:5236 87:1668 90:101 90.8:1740 91.9:906 91.9:2400 93:3191 95.9:2077 97.8:53 98.9:1976 100.9:2001 102.8:455 107.7:1690 109.6:848 111:1928 111:4933 112.3:533 113:111 115.8:16550 117.1:3062 118.3:498 120.2:1 120.9:214 123.2:2217 124.4:2706 127.5:1233 …
Unknown	4212	17.3267	1338.89	[216.6]	216.9	3756.72	4695.75	274173	342706			-1	-1	-1	-1	51.2:5598 52.2:4344 54.2:777 62.1:2362 63:2664 64.1:5925 65:4681 66.1:653 67.2:695 68:2420 69.2:837 70.3:598 71.1:6621 78.1:40005 83:252 83.7:3771 86:602 91:2860 101.7:6316 103.4:5151 107:1914 108.6:214 111.7:2356 119.9:3759 121.4:1894 121.4:2400 123:782 124.7:1 125.4:153 127.8:2594 130.2:0 132:891 132.89999:2988 134.2:696 135.2:1195 137.60001:909 137.60001:1804 146.89999:8958 148.2:2869 149.8:14…
Unknown	4219	17.3422	1339.57	[71.2]	71.1	6212.96	12539.1	354508	715473			-1	-1	-1	-1	50.2:159 51.3:735 52.3:3295 57.1:1820 58.1:11084 63.3:235 63.3:1592 66.1:850 67:2702 68.4:1051 71.1:6213 79.1:289 80.2:200 81:6009 84.2:10387 86.2:3108 86.8:715 89.9:1216 91.3:7696 93.1:1373 96.5:320 97.6:2038 99.9:4098 106:2187 106.8:355 107.8:3117 108.4:2823 109.9:1064 111:853 112.1:1996 112.9:5343 115.1:1248 116.1:9524 122.7:275 123.6:170 127.8:2842 128.89999:5 132.8:5360 133.5:6807 135:3538 1…
Unknown	4226	17.3576	1340.25	[229.9]	229.9	41082.6	115260	494138	1.38633e+06			-1	-1	-1	-1	53.3:2274 54.2:180 57.1:18573 61.4:1003 62.4:3235 65.9:2327 67.1:1393 67.1:9723 68.2:3628 69:10491 69.9:17406 71.3:30238 76.2:19200 77.2:1328 78.1:22032 81.2:453 82.5:1727 83.1:3953 84.1:9393 85:9302 86.2:3619 86.8:2879 91.3:3505 92.1:1 96.2:3504 99.2:2437 100:4760 103.8:1077 104.8:2180 107.5:3107 109.4:2197 112.3:3159 113.1:52 115:6712 116.9:4398 116.9:4579 126.9:2744 127.7:2825 133.89999:534 13…
Unknown	4229	17.3643	1340.54	[115.1]	114.9	6382	15220.1	343924	820209			-1	-1	-1	-1	50.3:3126 54.2:1528 55.1:4539 58:0 59.1:0 60.3:1963 61.1:1575 63:3696 63.6:7101 66.2:3563 71.2:2989 73.2:0 75:0 76.1:11210 79.1:7069 80.2:17664 81.1:4426 82.2:1182 83.2:1990 84:6467 85.1:4327 87.7:1969 88.2:4090 91:2437 93:1251 94:7553 94.8:7027 94.8:1275 96.9:1159 100.8:1 102.8:1606 103.9:2390 104.5:5035 105.2:2239 109.2:2307 110:1234 110.7:1679 113:4783 113.7:4028 114.9:6382 116.5:734 117:5109 …
Unknown	4230	17.3665	1340.63	[299.6]	299.9	3014.81	4450.74	353869	522414			-1	-1	-1	-1	50.3:457 53.3:1467 54.2:4623 55.1:4468 56.2:3279 57:6984 59.2:1 59.9:1113 61.2:893 62:2635 63.1:2499 64.1:255 65:3067 66.1:1134 67.1:1440 69.2:4905 70:13459 73:0 75.1:1709 77.1:2945 79.1:3271 80.2:15420 82.2:550 82.2:3715 83.9:3292 87:1512 88.5:165 89.6:3297 90.9:7535 90.9:3227 95:5154 95.9:3399 97.1:444 101.6:3110 102.7:7561 102.7:3941 104.2:926 105:489 107.2:2259 109.8:1077 111:498 113.3:3098 1…
Unknown	4232	17.371	1340.83	[238.6]	239	18052	42795.8	470294	1.11492e+06			-1	-1	-1	-1	51.2:2470 52.2:5330 53.1:1949 56.2:4603 57.2:25697 64.9:1793 66.9:2909 66.9:1941 67.9:9861 69:9141 71.3:28118 77.1:7028 82.5:8075 84.3:1755 85:10592 87.1:216 88:2173 91.1:7186 91.9:6223 94:5587 95.8:3499 99.1:3313 99.7:2056 99.7:5821 105.9:4920 111.9:1572 112.7:6376 113.5:1582 114.9:3559 119.3:5613 120.1:357 126.7:2644 127.2:4951 127.2:1711 136.8:1287 138:2173 139.3:1026 139.3:2132 141.3:3762 143…
Unknown	4237	17.382	1341.31	[71.1]	71.1	22241.9	19497.2	235687	206602			-1	-1	-1	-1	52.3:3500 53.2:3974 56:586 57:4665 60.4:1932 67.9:3307 69.1:5123 70:2653 71.1:22242 71.1:19232 76.4:8564 79.1:7708 81.2:212 82.8:2482 83.8:3134 83.8:5418 85.1:2827 91.2:1054 92.4:5352 94.8:850 94.8:1919 95.9:670 105:287 112.9:1000 123.2:1271 125.6:915 126.2:2593 127.2:2296 127.2:3376 128:1280 141.7:1891 149.5:141 150.39999:1290 150.89999:1777 158.8:82 160.39999:1209 162.2:1866 163.3:217 164.10001…
Unknown	4252	17.4152	1342.76	[173.6]	173.6	7674.06	16015.1	289318	603780			-1	-1	-1	-1	52.3:3562 53.4:1288 55:80 56.2:2997 57.3:4326 60.9:2486 62.1:1385 64:3603 65.8:439 70.1:2053 71.1:8173 79.2:0 83.2:1793 84:1048 84:2710 85.2:420 86:1294 87.1:1167 88.2:654 89.6:947 90.3:2576 90.9:4884 92.9:5395 94.2:7546 95.1:3220 98.1:729 102.6:865 104.7:3094 108:2970 109.5:49 109.9:2043 109.9:35 113:1097 114:295 117.8:1123 120.1:3175 122.1:828 125.7:382 126.8:0 126.8:1657 128.10001:1483 135.600…
Unknown	4253	17.4174	1342.86	[312.6]	312.4	3662.3	2568.68	218119	152985			-1	-1	-1	-1	50.3:12059 52.2:5257 54.1:4460 56.1:1167 57.2:0 59:1895 61.2:11 63.9:178 65.4:341 68.2:1 69.1:1247 73.1:3350 76.1:442 80.3:6396 82.6:261 84.1:1486 85:1562 87.4:3995 87.4:1528 88.4:1644 89.2:848 90.5:107 91.2:1 92.5:1225 94:2694 94:692 96:811 97.9:198 99.7:1761 102.7:3015 102.7:5495 104.1:1705 104.7:3024 105.3:504 106.7:390 107.6:3737 108.2:390 108.8:1229 109.7:86 111.5:2822 113.1:1119 114.9:1 116…
Unknown	4257	17.4263	1343.24	[313.6]	313.5	757.371	1336.49	361618	638127			-1	-1	-1	-1	50.3:11442 53.2:7891 54.2:10144 55.1:2602 55.8:2521 58.2:4506 59:1072 60.3:1838 60.9:1815 64.5:268 64.5:1931 66.1:2547 67.1:3095 68:3601 69.2:2794 69.9:3281 71.2:2161 73.2:0 77.1:2673 79.1:5130 81.1:5140 82:1063 85.1:1 86:3262 87.4:86 88.9:180 92.9:1287 98.7:1239 99.9:2109 103.2:3199 103.9:2616 106.7:2378 107.8:5663 108.9:1425 110.8:3833 112.2:1239 113.1:694 113.6:1658 114.8:440 115.6:4303 115.6:…
Unknown	4269	17.4529	1344.4	[131]	131	23649.3	53956.7	233401	532512			-1	-1	-1	-1	51.2:1355 53.2:726 59.2:7794 62.3:1212 62.9:3346 64.2:1749 65:820 66.2:431 68.1:711 72:3923 76:665 77.2:1 88.3:1082 93.1:4679 101.1:3112 102.9:2248 105.3:654 105.9:1592 107.9:753 110.6:1033 115.9:2677 116.6:6091 117.2:2085 118.5:449 124.5:1201 125.4:491 129.60001:6315 130.5:3810 131:23649 132.60001:3646 134.89999:962 135.89999:1548 137.3:351 142.7:1812 145.2:394 146.2:11637 146.8:12011 148.5:1355…
Unknown	4291	17.5016	1346.53	[353.5]	353.5	9197.85	8099.24	303986	267678			-1	-1	-1	-1	51.2:2823 52.2:2599 53.2:790 54:103 55.4:1352 57:384 58:4886 59:1 61.1:651 62.1:956 63:3312 64.1:1 65.9:1 67.3:1690 68:3276 70.3:1221 71:2477 71.7:3287 73.1:40155 75.1:1 78.1:1191 79.1:104 80.3:8393 81:8040 81.9:5164 84.9:1645 84.9:4898 87.5:286 88.8:1 90:3399 91.2:1323 92.1:1 92.8:1 94.2:0 95.7:297 97.4:1374 99.1:1870 99.9:1722 101.2:1117 103.8:1646 104.4:3744 105.8:89 106.5:1 108:1 108.9:0 111.…
Unknown	4294	17.5083	1346.82	[351.7]	351.7	51562.6	106225	422336	870066			-1	-1	-1	-1	50.2:8057 56.2:7132 61.2:689 62:2420 63:1466 66.1:1446 67.4:1788 83.4:558 87.8:2040 95.2:4362 95.8:3225 102.4:1306 103:162 103.6:4148 109.8:3103 114.2:4351 115.8:0 116.9:1 117.7:453 121.8:701 129.7:26 130.5:3826 131:1823 132.7:4194 132.7:4315 134.5:1310 135.7:1644 136.89999:571 142.5:536 143.10001:1 143.7:3085 150.5:964 156.60001:1324 158.60001:181 160:1305 162.10001:334 163.7:222 165.60001:4819 …
Unknown	4296	17.5127	1347.02	[152.8]	152.8	8401.1	6066.24	271826	196279			-1	-1	-1	-1	50.2:5090 52.2:8656 54.1:320 55.8:3142 61.9:1161 63:773 64.1:2694 67.9:1377 69.1:676 71:426 73.2:1947 77.2:5681 79.1:1 80.2:593 81.1:1574 82.1:335 85.1:148 85.1:7849 85.6:2802 87.1:1392 90:1247 91:2037 91.8:1121 94.1:2344 94.9:2458 96.9:752 99.2:3409 101:2117 102.3:3642 107.2:292 107.9:2048 110.4:5678 110.4:5492 111.6:5267 111.6:1555 113.9:2053 114.7:3979 118:414 121.1:823 121.7:1137 122.9:1304 1…
Unknown	4298	17.5171	1347.21	[73.1]	73.1	94874.1	204081	792927	1.70565e+06			-1	-1	-1	-1	50.3:2560 51.2:9573 52.3:2856 53.3:14604 54:2574 55.1:3579 56.9:3321 58.1:8532 58.1:11074 58.9:11289 58.9:15651 60.7:4712 61.2:1988 64.1:2433 64.7:4701 65.2:1908 67:3083 68.2:1087 70.6:4748 71.3:3752 73.1:94874 75.1:21284 76.4:8584 77.1:3368 78:6274 81:16517 82.1:22955 83.1:863 84:3033 85.1:3175 85.6:11661 86.2:4764 87.2:328 91.9:2955 91.9:7641 94.9:5280 95.8:4828 97.1:5087 98.1:6797 99.1:4689 99…
Unknown	4302	17.526	1347.6	[89.3]	89.2	17938.1	27704.6	453053	699720			-1	-1	-1	-1	51.2:5851 52.2:5527 53.3:16131 54.2:5941 56.2:158 57:1699 58.2:2884 58.9:6288 59.4:6050 61.1:1282 62.1:961 63.1:1241 64.1:1688 66:5435 68:1 69.2:8762 70.1:6191 73.1:1 75.1:10748 77.1:1 79.1:15418 82.1:11005 83.9:2224 85.1:6665 85.1:7706 87.1:1120 89.2:17938 89.2:16068 89.8:2607 91.1:4191 92:4942 93.1:7021 93.9:0 95.2:183 96.8:5840 97.4:2319 98:3112 102.5:3753 103.1:1347 106:2975 106.6:3812 107.2:…
Unknown	4329	17.5858	1350.21	[85.2]	85.2	14305.4	23500.9	295889	486087			-1	-1	-1	-1	50.2:1250 51.2:1206 52.2:1633 55.1:3535 56.2:8399 56.2:8141 57:13706 61.3:3587 62.1:751 63.3:917 64.3:391 65.6:1799 66.5:588 66.5:696 70.1:8818 71.1:17667 75.2:2185 76.1:7714 77.1:1352 79.2:1530 80.1:8771 83.3:1681 84:655 84.7:807 85.2:14305 86.2:224 87.1:751 89.9:1518 95.7:2195 95.7:2767 99:4346 100.6:810 103.1:4555 106.1:3447 107.9:417 111.2:1592 113.1:1918 115.7:312 119.6:1089 120.1:2819 121:4…
Unknown	4349	17.6301	1352.14	[266.6]	266.6	11375.2	24219.7	326005	694121			-1	-1	-1	-1	51.2:0 56.1:212 57.2:32 58.6:2972 63:1377 64:934 66.3:3876 71:3664 71:3566 71.4:6159 73:5379 74.1:6120 80.2:9708 84.1:4007 84.1:3980 84.7:472 84.7:93 86.5:156 87:743 87.8:543 93.9:1418 95.9:1235 96.6:3660 97.1:3151 99:970 99.8:255 99.8:2765 103.9:1844 105.1:135 109:1680 115.2:4085 118:2366 119.1:1176 124.6:1081 127.8:1402 127.8:946 132.3:2220 133.10001:2378 133.10001:4022 134.60001:83 137.3:831 1…
Unknown	4350	17.6323	1352.24	[443.6]	443.7	1597.27	1584.66	199772	198195			-1	-1	-1	-1	50.2:8108 52.2:1207 61.2:0 62.9:1560 66.1:3318 67.1:2017 69.1:3915 70.2:1751 71.9:857 76.1:16691 77.2:1 78:10603 82.2:790 84.2:4220 84.2:2992 85:1990 85.7:293 88.8:632 93.1:278 97.1:5101 98.2:126 98.8:988 102.9:1989 104.8:791 105.5:644 106.6:183 107.3:778 107.9:740 111.2:858 113:19 115.2:2565 116:990 116:1002 118.7:485 120:1 124.9:278 126:585 126.7:567 129:0 131.3:3610 135.8:1723 138:1 138.89999:…
Unknown	4382	17.7031	1355.33	[203.6]	203.4	7049.61	15031.9	223202	475936			-1	-1	-1	-1	50.3:2727 51.3:743 52.2:1481 54.1:809 57.1:4213 58.9:3563 63.7:875 66.1:1304 68.1:1826 75.1:7442 77.9:20601 83.1:1919 91:636 94.8:1037 94.8:2302 95.8:3801 98.9:393 99.7:3509 101:1227 103.7:1686 104.7:412 107.5:815 109:1389 110.4:309 111.7:1727 112.6:476 112.6:829 116:3604 119.6:6539 120.3:223 121.2:472 122:1525 124.5:41 125:1216 127.3:706 134:496 135.3:1234 138.60001:46 141:873 143.2:2865 146.7:3…
Unknown	4387	17.7142	1355.82	[323.6]	323.9	8327.43	19034.3	303386	693460			-1	-1	-1	-1	52.2:1089 60:1729 62.8:114 64.1:1967 65.1:628 69.3:5455 69.3:5289 71:825 71.9:3037 77.1:6697 79.1:17133 80.1:2887 81.6:6735 82.1:2512 86.2:1021 89:2533 89.7:147 93:899 99:2085 99.9:2219 102.9:3783 106.2:2274 107:4789 107.7:387 108.9:2782 110.2:42 111.7:0 112.9:515 115.3:2878 115.8:5466 117.9:50 118.8:2422 120.1:2609 120.9:1016 121.6:277 123:1266 125.1:1822 125.8:1451 127:1192 127.9:1771 129.8:119…
Unknown	4396	17.7341	1356.69	[297.4]	297.5	2369.13	2207.46	221121	206032			-1	-1	-1	-1	50.3:6759 52.2:1 53.2:3795 54.3:3737 57.3:2912 59.3:1 62.3:545 63:2899 64.2:426 65.5:1269 68:0 70.1:3573 71.1:559 71.1:2861 81.5:0 83.4:5623 83.4:3352 84.1:3060 85.5:2754 86.3:1292 86.8:401 88.3:191 95.5:1922 96.7:909 99.9:1 103.9:0 104.4:2058 105.5:3904 106.2:792 109:686 110:1024 112.7:556 113.5:115 137.2:40 138.5:526 148.7:706 151:590 155.89999:2310 160.60001:56 161.8:2121 163.7:1318 165.2:307 …
Unknown	4397	17.7363	1356.78	[297.8]	297.9	32578.1	62518.4	508606	976033			-1	-1	-1	-1	51.3:0 52.2:917 53.2:7031 54:6366 56.3:2066 58.3:5596 60.4:2728 61.2:2300 62.9:2904 63.9:3451 66.1:1 66.9:2116 68.3:948 69.3:5097 73.2:24026 75:17463 77.2:7238 79.1:9619 85.2:1434 87.2:1 89:1 90.2:2041 91.2:201 93.6:5128 96.1:3725 102:1066 103:4535 107.4:1960 109.6:4948 110.8:0 111.6:1418 111.6:2331 112.1:2282 114.9:2411 116.8:17892 117.3:9304 118.8:2319 121.3:1380 122.4:1656 123.1:2164 124:81 12…
Unknown	4402	17.7474	1357.27	[299.1]	299.1	4579.2	7360.88	335849	539864			-1	-1	-1	-1	50.3:2579 51.3:754 53.3:13021 57.7:3189 58.3:3528 59:2857 64.3:1026 65:81 67.1:233 68.2:6464 70.2:2713 71.2:2174 73.1:20799 75:16035 77.1:4857 78.1:26409 80.4:3340 82.9:1094 84.1:6209 85.9:1297 86.7:3230 87.3:2789 87.8:2685 88.5:2726 90.8:355 93.1:390 97:2697 97.8:3232 101:1569 101.8:1030 104:1235 104:2715 106:1910 107.5:2703 110.8:1696 116:1712 117:6248 122:767 123.7:956 125.8:2210 125.8:3378 12…
Unknown	4403	17.7496	1357.36	[131.9]	131.6	43601.7	81059.5	524118	974383			-1	-1	-1	-1	52.2:1 54.3:2371 55.2:12441 56.9:5092 57.9:6730 60:3133 61:8731 61.8:6665 64.9:3780 66:1323 67.3:8603 68.2:6815 69.1:4902 75.1:18732 76.1:3440 77.1:12117 79.1:17121 81:3802 86.2:2259 87.6:23 89:0 90.3:0 91:852 91.9:2266 93.2:3581 94.1:5460 96.3:2649 99.2:4815 99.2:5813 99.8:1464 105.3:8557 107.1:316 108.8:1163 108.8:2275 111.5:474 112.4:1489 113.4:1339 115.1:3832 117.1:25508 119.3:5203 121.5:2379…
Unknown	4405	17.754	1357.56	[129]	129	43218.7	107171	745809	1.84942e+06			-1	-1	-1	-1	50.2:3351 52.2:3378 54.2:1 55.2:2822 56.1:6494 58.1:8488 59.1:2255 59.8:5925 61.3:2774 62.2:2009 63.1:1 63.9:1 65.1:1805 67:11276 68.1:5677 70:4511 70.7:4346 73.1:2025 75.1:138412 76:22087 77:9336 79.2:9771 80.2:12715 81.1:13067 82:2565 85.4:4461 86.1:1460 86.9:2908 88.9:5729 90.1:1892 92:1589 93.8:2771 94.5:7162 95.1:2951 96.1:4063 99:3141 103.1:6111 103.9:3913 104.9:2595 105.7:2765 109.4:2933 1…
Unknown	4406	17.7563	1357.65	[73.1]	73.1	111441	251891	795879	1.79894e+06			-1	-1	-1	-1	50.3:2263 53.5:9933 55.2:10551 56.1:6592 56.9:4416 58.9:5301 58.9:1113 58.9:9217 61.1:1275 66.9:8884 70.1:319 71:6165 73.1:111441 75.1:137969 76.4:23150 80.1:10737 81.9:3605 83.1:305 84.1:7791 84.9:3690 86.2:1167 87:4556 87.6:4160 89.2:953 90:2401 90.8:1815 91.9:2528 94.3:7949 96.9:1660 98:1428 100.9:7829 102.2:514 104.1:3808 105.1:4493 106.7:1 107.6:1767 108.9:1250 110.9:3409 113.7:1984 114.7:33…
Unknown	4410	17.7651	1358.04	[145]	145	17116.8	35616.6	540757	1.12521e+06			-1	-1	-1	-1	51.2:4569 52.2:11799 55.2:7539 56.8:4813 61.1:14290 61.1:10822 63.3:1276 65:1404 66.2:4459 67:1117 68.2:13 69.3:6592 71.7:14041 71.7:9430 73.1:8804 79.1:8103 81.2:7419 82.1:2366 82.9:3889 86.4:640 88.5:2006 88.5:2853 91.2:3126 93.1:6735 93.1:8716 93.9:676 94.9:1809 95.8:255 98.6:745 99.3:3794 99.9:7045 99.9:8478 102.4:6957 103:15896 104.8:5636 106.1:3445 107:1895 108.8:1988 109.6:489 110.8:423 11…
Unknown	4412	17.7695	1358.23	[172.8]	172.8	4470.22	6309.61	281335	397097			-1	-1	-1	-1	50.2:2012 51.1:1222 52.2:6418 53.2:11925 54.2:1112 55.2:2773 60.1:607 60.9:3982 63.8:62 70:1257 71.1:4368 71.9:7582 73.1:852 75.1:8469 81:274 83.1:1836 84:6172 85.2:3648 89.9:1624 91:152 91.8:1 94.8:3784 94.8:364 96.1:1534 97.1:4124 98.9:3173 100:949 101:3926 102.9:3937 103.5:591 104.2:2190 105.2:4302 106.1:1042 109.2:2430 110.2:950 111:471 116:1367 117.1:461 118:4112 119.9:1722 124.7:1940 125.5:…
Unknown	4420	17.7873	1359.01	[174]	174	55388.5	119651	338850	731990			-1	-1	-1	-1	50.3:3074 51.2:4803 59.2:8598 64.7:1076 66.1:1405 68.3:499 69.2:331 70.2:624 71:1867 73.1:21555 77.1:2280 79.1:4405 80.4:5604 81:486 83.2:393 85.1:80 86.2:15261 88.5:2142 89.1:1893 92.9:2332 95:1291 95.6:1841 96.9:83 100:9788 101.5:142 103.1:2171 103.7:4290 105.3:2839 106.6:455 111.1:112 112:470 113.7:5175 114.8:1679 115.9:1126 120:1496 122.6:436 125.1:154 125.1:941 127.8:144 129.5:1473 130.10001…
Unknown	4432	17.8138	1360.17	[293.5]	293.8	20181.1	35034.6	359703	624448			-1	-1	-1	-1	51.3:5712 52.2:1494 53.2:7113 55:1 59.1:2514 59.7:1 61.5:4728 63.3:6116 64.8:4273 67.1:1012 69.2:3188 71.3:420 73.1:1 76.4:0 79.1:9968 83.8:941 85.7:1820 85.7:6852 86.9:2054 87.8:2783 88.7:1296 96.6:4124 100.1:1590 101:2418 101.5:3460 102.2:3250 104.3:1353 107.1:3238 108.8:331 110:2489 113.6:731 114.7:2349 116.8:1618 120.6:3379 121.9:674 123.1:472 124.8:1276 126.2:439 129.10001:1432 129.10001:0 1…
Unknown	4433	17.816	1360.26	[294.7]	294.7	10251.8	10869.4	300399	318495			-1	-1	-1	-1	50.2:3284 51.2:2059 52.2:4155 54:1272 55.3:0 57:2910 58.1:1132 58.8:4646 58.8:2065 61:2950 63.1:2037 64.9:4176 68.1:123 69.2:2260 73:1 75.1:7714 78.1:18752 79.1:9153 81:451 83:1 83.8:843 85.5:4895 89:567 91:61 91.7:3569 91.7:6135 92.9:1005 96:1127 96.8:1743 100.6:4123 101.2:1280 102.3:4772 104.7:1536 105.3:0 106.8:824 109.2:1420 110.3:627 111.1:433 113.9:1739 116.8:1 118.4:3961 122.7:257 123.9:1 …
Unknown	4434	17.8182	1360.36	[382.5]	382.1	1660.46	1241.12	250072	186917			-1	-1	-1	-1	50.2:6057 51.3:161 52.2:6852 53.2:1524 56.1:3514 57.4:3588 59.1:766 60.4:575 62.2:2191 66.2:2812 66.2:3651 67:1148 67.8:1232 68.4:6485 71.1:1439 75.1:9817 76.2:2250 78:11388 80.3:4376 80.9:2441 82.1:598 83.1:388 85:2976 87:2152 87.9:4703 91.1:6200 97:369 99.1:1998 100.9:2191 104.7:154 106.6:987 107.8:1682 108.8:2822 111.6:700 115.1:661 115.7:2680 122.8:167 125.5:548 127.9:1734 137.3:254 139.2:963…
Unknown	4446	17.8448	1361.52	[118.6]	118.9	8982.44	11108.1	265946	328882			-1	-1	-1	-1	51.3:1849 52.3:1095 53.2:1644 54:6533 56.1:1748 61.8:750 63:2528 63:4358 65.2:4731 66:3768 66.7:4245 67.9:933 75.1:7301 76.1:11171 77.9:5069 79.2:2141 80.6:3118 80.6:1158 82:4450 83:2637 84.9:2535 86.4:3840 89.9:6119 91:850 94.1:1232 94.9:790 95.9:3185 97.4:1093 98.8:2043 105.3:1651 105.3:4025 106.5:213 108.6:3494 111.2:1796 116:1415 117.9:5092 118.9:8982 120:1447 120.9:1942 125.7:838 127.6:377 1…
Unknown	4452	17.8581	1362.1	[91.3]	91.3	20272.8	32796.7	335817	543276			-1	-1	-1	-1	50.3:5652 52.2:692 53.3:5418 54.1:3458 55.1:1098 56.7:9658 58.4:220 62.8:942 63.5:3152 65.1:5378 65.7:4947 66.5:82 75:9513 78:27145 81.5:1242 84.2:389 85:3150 88.5:1041 90.8:14121 91.3:20273 92.1:651 93.1:3242 94.2:5012 96.1:2470 98.1:204 103.5:91 106:1003 110.9:6 115.8:759 116.5:182 118:852 118.9:20864 120.1:2449 121.7:749 123.7:236 127.1:2190 127.8:454 128.60001:2425 129.10001:4103 130.8:603 13…
Unknown	4473	17.9046	1364.13	[318.1]	317.7	0.690674	0.690856	178939	178986			-1	-1	-1	-1	50.2:6236 51.1:2917 53.2:4712 57.2:10 59:2511 63.2:1480 64.2:346 66.6:84 72:583 73.9:20 76.1:0 79.1:6837 81:2096 84.1:5465 85.1:4600 86:4129 86.7:0 86.7:1114 90.9:2074 94.9:882 95.9:1 97.2:1369 97.9:717 99.7:5089 99.7:1034 102.9:1391 105:1684 105.7:1519 107.6:674 110.7:2568 113.9:1327 117.5:1654 118.2:2572 121.2:856 124.8:1720 126:197 126.8:689 136.60001:800 138.2:1 140.5:197 141.10001:854 142.10…
Unknown	4476	17.9113	1364.42	[57.2]	57.2	19887.7	39919.8	327866	658110			-1	-1	-1	-1	51.3:8954 55.1:2820 56.1:8597 57.2:19888 58.1:77 58.8:5500 60.6:50 64.6:3895 65.3:1905 66:1899 69.3:1579 71.4:8748 74:4893 75.1:695 77.1:2001 80.1:0 83.1:3825 85:10870 87.6:419 90.2:1950 90.9:1301 91.8:4577 93:3483 96.9:3137 101.5:2607 102.9:3013 103.9:1223 105.9:868 107.1:1 109.8:4022 110.9:447 112.7:2942 114.4:2499 116:2950 116:6777 118.8:80 120:5167 120.7:1042 122.7:1370 124.5:596 124.5:113 12…
Unknown	4531	18.033	1369.74	[212.6]	212.7	12295.5	25096.7	372842	761018			-1	-1	-1	-1	52.3:8427 53.1:3753 54.1:1189 55.4:3543 55.4:4077 57.4:0 59.7:2118 62.5:3070 63.2:3207 65:3062 66:3529 69.3:584 70.8:1417 71.5:613 73.1:104 75.1:13626 77.2:0 78.1:4171 79.1:6906 81.9:2814 83.6:3744 84.1:7261 85:4179 89:4502 93.2:1411 94.9:335 97.3:1074 98:907 99.2:1749 99.9:622 104.9:2863 107.9:2797 109:1797 109.5:5011 110:2668 111.7:2084 113:1880 113.7:1872 117.1:1220 117.1:8185 121.7:1146 123.3…
Unknown	4534	18.0397	1370.03	[73.1]	73.1	82366.4	160179	499845	972052			-1	-1	-1	-1	50.2:1715 55.2:2896 56.2:1977 59.2:7664 60.8:2860 61.5:4649 62.1:1036 63.8:2845 64.6:750 67.1:4014 69.9:4085 73.1:82366 76.2:4685 79.2:1 80.2:272 81.3:4102 81.3:5792 82.2:6287 84.3:2551 85.1:805 85.8:6125 86.8:197 88.3:56 89.1:13166 91.9:5687 93:363 93.9:1759 95.8:4867 97.2:3660 98.6:1580 101.1:3167 103.1:26398 104:5916 106.9:2004 107.7:2783 108.4:1071 108.9:1035 109.9:2744 110.4:4173 113.9:3457 …
Unknown	4536	18.0441	1370.22	[218.8]	218.8	7952.07	14385.7	312408	565162			-1	-1	-1	-1	51.3:1 54.2:9063 58.1:4086 58.9:9445 61.1:1418 62.8:784 63.6:5917 66.1:274 67.2:4604 68.4:3081 69.2:3629 71.1:0 76:7869 77:1 78.1:24209 80.2:7267 81:44 87.2:595 89.9:2441 91:2832 91.7:6061 94.9:1146 96:3505 97.3:2018 99.1:1325 99.7:4329 100.2:3633 102.1:2324 103.9:5549 105.6:1647 108.8:1 111.2:6762 112.1:1551 118.1:1985 120.1:3030 125.8:1583 128:2187 129.5:282 132.39999:1968 136:2619 136:1409 137…
Unknown	4572	18.1238	1373.7	[109.1]	109.1	21056.5	45263.9	331391	712372			-1	-1	-1	-1	51.2:2039 52.2:8098 54:340 54.9:2301 58.2:6153 62.2:2856 63:646 63.7:669 64.3:2235 65.9:1758 67.2:5996 67.9:1918 68.4:8204 69.3:4479 70:2811 70.9:2336 75:2124 79.1:7688 80.2:10681 82.4:2032 83.1:3830 83.8:1512 86:660 87:1152 87.7:2550 90.8:5752 90.8:6139 92.8:5219 92.8:7779 94.8:1655 94.8:7204 96:1444 98.6:1326 99.9:2617 100.5:1945 102.7:1028 103.3:1555 104.8:2849 104.8:4818 106.9:2851 107.6:367 …
Unknown	4579	18.1393	1374.38	[165.6]	165.8	8222.69	19002.5	266498	615872			-1	-1	-1	-1	51.2:3040 53.2:8838 55.2:975 57.1:155 58:888 60:2354 65.1:2865 66:2904 67.2:2423 68.2:1894 70.3:1473 76.1:9793 77:2685 79.1:163 81.2:348 83.6:483 85.4:3163 86.3:1330 87:1100 87.9:1629 89.7:1195 90.7:5860 91.8:5211 94:1419 94.7:3575 95.4:3448 96.5:453 98.8:1041 99.8:667 101.6:1479 102.9:293 103.9:497 105.1:432 106.2:850 108.9:829 110.3:1877 111.5:1590 112.8:182 114.1:151 118.5:1275 119.8:1767 122.…
Unknown	4594	18.1726	1375.83	[81.9]	81.9	16452.7	32731	376551	749113			-1	-1	-1	-1	50.2:5189 52.2:12740 54:2351 55.1:1114 55.9:4257 59:7517 61:3205 61.9:2106 64.2:3680 67.3:587 68.5:7350 70.3:2347 77.1:5416 80.2:9855 81.9:16453 81.9:5544 83.5:3394 84.9:3316 86:1957 87.3:79 89.1:9747 90.5:775 91:850 93:1776 93.7:3822 95.3:4570 98.9:3283 100.1:2953 101:1716 104.5:1775 105.1:4246 106.6:1249 107.9:4500 109.2:1485 110.2:1387 110.9:2517 113.4:3268 115.6:756 115.6:4007 118.7:5974 119.…
Unknown	4597	18.1792	1376.12	[73.1]	73.1	30597.2	64967.5	425490	903448			-1	-1	-1	-1	51.3:4943 54.3:7738 57.3:1332 58.1:527 59.9:1493 61.4:5247 65.4:150 66.1:662 71.3:4848 73.1:30597 75.1:24916 78.1:22213 79.2:15223 81:8777 82.1:20295 83.8:1933 86.3:3894 88.9:2975 88.9:5273 92:4411 93.1:4314 98.1:450 102.9:1058 102.9:1093 111.6:5598 112.7:2054 114:119 123.5:1479 126.5:745 127.1:1930 133.2:1055 135:3693 136.10001:2195 136.60001:544 137.8:863 138.89999:1960 140.5:1056 143:677 143:9…
Unknown	4617	18.2235	1378.06	[239]	239	7098.98	5426.41	194910	148987			-1	-1	-1	-1	50.3:5167 51.2:2961 57.9:3961 57.9:223 59.1:205 61.2:1563 67.1:3503 73.1:1756 78.2:1564 80.3:8825 82.4:4131 87.1:1712 88.4:3167 90.9:209 91.3:247 92.9:1897 92.9:4834 96.1:2689 98:1334 99.9:2442 103.8:785 104.6:509 106.1:29 107.8:1154 109.5:63 111.3:109 115.5:133 118.2:1729 118.2:6368 120.9:6445 124.9:10 128.89999:133 129.5:1077 135.3:595 137.3:205 137.8:97 138.3:1372 139.5:473 140.2:1265 143.8:75…
Unknown	4625	18.2412	1378.83	[241.5]	241.7	1689.42	2815.2	313687	522718			-1	-1	-1	-1	50.2:8993 51.2:3913 52.2:8253 54.1:5679 57:236 58.3:1 59.8:1540 64:530 64.5:3414 65.6:59 66.1:4853 67.2:4589 68.3:0 69:1 71.2:2466 77.1:5755 79.1:9213 81.2:2757 83.9:960 85:1 85.9:0 86.5:814 87.1:196 93:6395 94.3:39 96:3604 96:4990 97:1025 97.7:0 98.9:4082 98.9:7791 99.9:4078 105.9:2579 107.7:2635 108.3:2334 109.8:885 111.5:444 112.2:1807 121.2:2443 121.8:1 122.8:2881 123.4:56 124.4:284 125.2:28 …
Unknown	4626	18.2434	1378.93	[239.6]	239.6	46858.5	128435	356669	977597			-1	-1	-1	-1	50.4:7418 51.2:5831 52.2:7598 53.2:4233 60.4:691 61.1:0 61.7:2399 63:564 64:1245 64.8:1728 65.3:7428 72:555 79.1:21402 90.9:3184 92.9:5710 93.9:1168 99.6:3938 100.8:121 101.6:2785 103:2061 105.1:3230 105.8:1704 106.8:4274 109:1591 112.6:8287 116.6:1450 118.9:1428 125:1255 125.9:646 127.7:1832 129.2:336 130.60001:5217 136.5:2220 138.7:629 142.8:3143 147.89999:1788 152.3:1553 153:1894 158.3:0 159:1…
Unknown	4627	18.2456	1379.02	[253.6]	253.9	786.649	2020.52	310408	797287			-1	-1	-1	-1	51.2:6458 52.3:7116 54.1:2147 56.5:0 57.6:822 58.2:0 62.1:432 63.2:1 65.2:5711 65.2:6042 67.2:6291 68:1893 69.2:1 70.1:0 70.9:1289 71.8:6336 75.1:0 76.2:8579 79.2:14311 80.2:3972 81:3234 84.1:1610 85:1747 87.4:3206 89:0 91.9:2130 94.9:1268 95.9:3424 96.7:1414 98:2216 98.6:4258 102.3:0 103:836 103.8:785 104.8:4548 107.5:1936 109.8:0 110.3:1006 112.3:4808 112.3:5418 114.7:1 116.7:536 120.2:1602 121…
Unknown	4631	18.2545	1379.41	[120.5]	120.8	1790.99	2076.4	263045	304964			-1	-1	-1	-1	51.3:3622 52.2:389 53.2:9993 55.2:1041 57.1:112 59.1:837 64.1:1321 64.6:140 65.2:2012 66.5:2583 67.3:2508 67.8:9894 71.8:2463 75:3254 76.2:5287 77.2:737 78:20822 80.2:5137 84.9:3153 86.4:78 87.5:2591 89.1:1 93.9:72 95.1:1582 97.1:1525 97.9:587 99.6:1873 100.1:2264 101.4:1155 102.1:213 103.9:2714 106.6:2915 106.6:2568 109.9:1 111:1986 112.6:5718 116.8:1681 118.8:3375 120:2136 120.8:1791 122.2:1411…
Unknown	4636	18.2656	1379.89	[130.8]	130.7	12534.8	26875	389234	834529			-1	-1	-1	-1	50.2:702 53.2:2126 54.1:3307 56.1:2355 57:1474 58:3809 59.1:1600 60.1:1645 63.2:737 66.4:5795 69.2:525 70:3739 70.8:534 73.1:31505 74.1:12125 75.1:15685 76.2:22256 79.2:14858 80.3:15441 82:199 84.2:4787 84.2:4748 85.8:476 86.7:1014 88.7:99 90.6:2815 91.4:845 92.8:643 94:1468 95:1357 95.7:0 96.5:3381 97.8:0 98.9:6014 99.9:1797 100.8:273 103.3:4921 104.2:9 104.9:3406 110:162 113.1:807 113.9:1562 11…
Unknown	4639	18.2722	1380.18	[246.2]	246.5	3506.8	5135.34	342065	500918			-1	-1	-1	-1	51.2:5552 52.2:8695 53.2:14214 55:4159 56:5318 57.8:3746 58.6:5677 61:2191 61:996 61.9:312 63.1:2734 63.8:2426 64.4:1505 65:3226 68:4122 71.1:1064 73.1:9679 75:12669 76:1520 77.1:3786 80.1:3061 84.5:762 84.5:403 88.4:1618 89.1:2366 90.4:2519 91:624 92.1:1 93.9:1913 95.4:2982 97.9:772 99.4:3752 100:5016 100.7:5589 101.3:2197 102:6784 102.5:9026 103.1:614 104:1414 106.3:1336 109.6:1644 113.1:556 11…
Unknown	4643	18.2811	1380.57	[218.4]	218.4	4167.08	4851.75	210620	245226			-1	-1	-1	-1	50.2:2976 51.2:1782 52.2:276 54.1:2303 55.1:1399 59.1:301 60:682 62.1:3284 63:311 65:162 69:30 71.1:97 72:2793 73.2:1650 82.1:2792 83.3:2749 85.6:452 86.4:306 87:379 89.1:399 89.9:293 93.8:338 95.7:2746 96.4:2424 97.4:3490 98:880 100.1:715 101.1:1193 101.9:1975 103:536 106.9:84 108.3:1753 111.1:2098 114.3:1950 114.9:158 114.9:5604 117:1766 119.7:4841 124.6:66 126.9:825 127.8:1366 129.2:3349 129.8…
Unknown	4650	18.2966	1381.25	[153.8]	154	11301.3	24482.2	517139	1.12029e+06			-1	-1	-1	-1	51.2:5810 52.2:16088 53.9:3210 54.4:7050 55:1879 55.9:5796 59.1:1163 63:559 63.7:870 64.3:2773 65.1:2716 69.2:5270 71.3:3568 71.3:3059 73.2:1 76.1:1 77:2708 77.9:18008 79.1:24581 81.1:2383 84:2276 85.2:2759 85.9:3472 86.9:291 87.9:1519 88.9:1132 89.9:1704 90.7:1 92:9379 92.9:522 96.2:4857 100.9:3312 102.9:3723 103.7:3106 109.6:2106 110.3:412 112.3:0 113.4:1110 113.9:2123 116.7:3911 118.5:5535 119…
Unknown	4653	18.3032	1381.54	[167.8]	167.8	40678.1	89846.3	371781	821158			-1	-1	-1	-1	50.2:8043 52.2:2337 53.1:8116 56.1:3098 57:6283 58:1487 58.9:9243 60.1:3610 61.2:4836 64.9:3503 68.2:1754 70.3:2363 73:1 75.1:2854 77.1:2531 79.1:6636 81.9:3050 83.9:44 87.9:1477 91:704 93:567 94.7:1256 96.1:1575 98.4:6195 105:799 106.1:6264 108.2:1285 108.2:6016 108.8:1372 112.9:4121 116.5:3991 117.6:3493 122:992 126.9:2546 127.7:94 131.10001:1 133.7:2635 135.5:3074 136.3:959 140.60001:2228 141.…
Unknown	4662	18.3231	1382.41	[212.9]	213.1	10653.9	23792.4	341722	763138			-1	-1	-1	-1	51.3:4823 52.3:2964 54.1:5401 55.8:2188 58.1:803 59.1:3497 61.1:1337 63.2:4723 64.1:4128 70.2:4774 70.8:2074 75.1:16637 78.1:11319 80.2:11013 82:4792 84.2:5030 85.1:1322 86.4:4225 87.3:1 88.3:2783 89.1:6866 92:5591 92.7:10472 94:4624 94.9:330 104.4:0 105.2:549 106:1851 108:1038 108.9:1451 109.6:1972 111.3:2683 112:3869 114:86 121.2:1 123:1641 123.7:289 125.2:1264 126.5:149 127.7:1 128.3:0 128.8:5…
Unknown	4663	18.3254	1382.5	[73]	73.1	42305.3	57360.8	398669	540546			-1	-1	-1	-1	50.3:5872 53.3:11378 54.1:6074 55.1:3901 56.1:3196 60.3:3072 62.3:697 65.1:3057 65.9:5639 67.1:5104 68:2489 69.2:3231 70.9:2084 71.8:3038 73.1:42305 74:3636 76.1:3443 77.2:6360 80.8:2253 81.4:7622 82.1:3922 82.8:3941 83.9:3956 86.1:4881 86.8:1094 87.6:1548 88.2:2697 89.1:630 90.7:3203 93:4009 93.7:6648 95.8:2856 97.2:2204 97.9:0 98.7:1 101.1:0 102.6:1652 103.5:4884 106.2:3792 107:1520 108:21 108.…
Unknown	4681	18.3652	1384.24	[221.5]	221.7	8893.14	12047.9	297245	402691			-1	-1	-1	-1	51.2:5331 52.2:5714 58:2054 59:3317 61.4:2371 64.3:3713 65:216 69.1:2743 69.9:1900 73:14575 75.1:7694 76.1:7690 78.2:5582 80.2:80 81.1:3413 82:3659 82.7:2930 82.7:2793 85:1 87.8:597 87.8:1343 91.1:1976 92.8:954 93.8:3430 97.1:1066 99.9:1316 107.1:1251 108.7:946 109.8:1 112.1:1759 112.8:554 112.8:2471 114.6:4029 117.8:1954 120:1499 121:123 121.9:755 127.2:366 134.8:2824 139.60001:1328 140.10001:19…
Unknown	4684	18.3718	1384.54	[73.2]	73.1	67220.9	122697	587898	1.07308e+06			-1	-1	-1	-1	50.2:6535 51.3:2533 53.2:5156 54.1:4185 55.1:2556 55.7:223 56.3:3705 56.3:4074 58.1:3088 63:317 66:221 67.2:2377 73.1:67221 75.1:3955 76.3:6326 77.1:5739 79.1:5838 81.2:3236 84:1976 86:1516 87:1177 87.8:1628 91:3351 95.9:1605 97.8:1268 98.9:3469 101.1:2112 102.8:9278 103.9:2499 107.1:1998 108.4:542 111.1:613 113.1:639 115.7:2165 117.1:3967 118.9:1477 119.4:2502 120.1:7 120.7:1 122.1:1818 123.5:18…
Unknown	4714	18.4383	1387.44	[364.8]	365.6	2894.84	2662.24	209588	192747			-1	-1	-1	-1	50.3:4522 54.3:3149 55.1:430 56.2:1159 59:477 59.7:1698 60.8:1569 61.6:3243 63:537 64.9:3907 66:897 68:2454 69.4:1558 70:6651 70.6:5410 74:5687 75.1:5564 77.1:4458 79.1:2748 81.9:2711 83.5:2074 83.5:1467 84.5:820 85.9:1576 89.9:2498 92.9:405 95.9:1360 95.9:6163 99.9:2446 101.2:1474 104.9:1874 106:1771 114.7:356 117.8:1416 119.8:531 121.3:567 123.1:1464 131.39999:1554 132.8:996 133.8:1 137:1469 14…
Unknown	4733	18.4804	1389.27	[213.1]	213	3065.05	7285.44	503124	1.1959e+06			-1	-1	-1	-1	54:4678 55.1:13087 56:2312 57.2:13692 58.5:10597 59.1:16224 63.9:2423 66.2:1927 69.2:8716 71.1:4520 77.1:5332 79.1:0 82:2833 85.2:3096 88.9:15980 92.9:5541 95.2:6076 97:7991 97.9:5678 98.8:6466 100.1:7530 103.2:7493 103.2:15558 106.8:456 107.8:932 109.6:1266 112:12968 113.1:6929 116.1:1389 118.2:2626 123.7:5005 124.9:50 130.8:20039 137:2601 139.10001:2398 140.2:10780 142.2:1682 143.3:6500 144.7:2…
Unknown	4734	18.4826	1389.37	[228.7]	229.1	9598.09	17782.4	584971	1.08378e+06			-1	-1	-1	-1	53.3:16551 55:15417 55:8567 56.1:2572 56.6:6365 58.9:23289 58.9:7768 61.9:1960 62.7:2591 63.8:3410 66.2:7906 69.3:5043 77:4166 80.1:10397 81:3710 82.1:6095 83:3429 84.9:5565 88.1:2613 89:16854 94.8:3774 97.9:2375 98.9:1793 101.5:1292 103.1:11043 104.1:431 105:349 105:3064 106.5:2629 108.1:9607 110:7342 112.1:9924 113.2:9484 113.2:9756 115.8:2291 118.3:678 119.5:2683 122.8:4982 125:1419 126.5:9056…
Unknown	4736	18.487	1389.56	[73.1]	73.1	165439	323360	956860	1.87024e+06			-1	-1	-1	-1	51.2:14476 52.2:17845 55.2:9765 57.1:2894 58:1231 59.1:17542 60:2275 67.2:8472 68.1:3570 71:3217 73.1:165439 75.1:12858 76.1:6153 79.1:2127 80.3:18041 81.2:11367 82.1:20972 84.1:5554 85.7:3605 87.3:4466 87.3:3273 88.9:15291 90.1:1809 91.1:1791 91.9:7476 92.7:277 96.2:5029 97.1:1579 98:5486 99.9:6202 101.9:6153 105:486 106.7:1264 108:7508 108.9:8480 109.6:8703 110.7:3337 111.6:8807 112.1:10668 114…
glutaric acid	4740	18.4959	1389.95	[146.7]	146.7	79648.2	136974	820714	1.41141e+06	OC(=O)CCCC(O)=O	JFCQEDHGNNZCLN-UHFFFAOYSA-N	515.259	808.939	788.462	792.365	50.3:2146 51.2:3478 53.3:17715 54.1:6714 56.2:188 59:6121 61.1:6003 61.1:7295 62.9:3414 63.7:8179 65:719 65.9:9009 66.6:8869 68.1:4703 69.2:6586 70.8:4633 71.8:4945 73.1:65660 75.1:49106 77:901 79.2:12260 80.2:3104 80.9:4995 84.9:240 85.5:3990 90.2:184 91.7:499 92.9:4519 95:1403 95.7:2939 97.1:4996 99.1:9622 100.9:7473 101.9:7026 103:2470 103.9:2694 104.9:3939 107:24 108.7:21 110.7:1958 111.4:322…
Unknown	4756	18.5313	1391.5	[295.7]	295.7	2558.05	1040.31	247171	100520			-1	-1	-1	-1	50.2:2838 53.2:2670 54.9:109 58.1:964 60.1:658 61:1020 61.9:118 63.2:852 64:841 65:1983 65.8:2677 68.2:160 79.1:824 80.2:2618 81.9:3007 83.1:573 83.8:2173 85.8:2360 87.5:3591 87.5:2284 93.1:4137 94.6:512 94.6:2219 98.7:263 101.2:3492 102.2:915 104:1459 107:285 109.2:1382 109.9:636 110.7:2028 112.6:346 114.6:1232 117.1:1458 118.3:4377 119.9:351 121.4:562 123.7:226 126:11 126.5:497 128.8:3540 130:2…
Unknown	4762	18.5446	1392.08	[414.5]	414.1	59847.2	132687	1.24935e+06	2.76994e+06			-1	-1	-1	-1	50.2:3244 53.3:9299 55:1959 55.7:9519 57.8:3043 59.1:10524 61.3:3217 62.2:1383 63.1:611 65:926 67.1:3550 69.3:1724 70.2:499 73.1:34661 74.1:1491 75.1:13397 77:2676 80.9:2598 82.6:5959 85.3:6950 87.1:2749 89:7110 90.9:6107 92.3:6567 93.1:828 95:6281 96.1:1961 99.9:5197 104.3:6140 104.3:2822 106.1:2657 107.8:805 109.8:1736 116:3698 116.9:2181 117.9:6336 119.6:8460 119.6:6624 125.2:1322 126.7:2592 1…
Unknown	4763	18.5468	1392.17	[177.5]	177.7	207.529	218.83	450802	475350			-1	-1	-1	-1	50.3:3027 52.2:1 55.2:2882 59.9:999 63.8:371 68.4:5577 70.4:2531 74.3:22475 75.1:29373 78.1:7481 80.2:1320 80.8:762 83:953 83.8:777 85:1378 87:3008 89.1:1054 91:483 95.3:1704 96.1:463 97.9:102 100.8:658 106:702 108.1:687 116.1:1098 116.1:1524 118.6:98 120.1:319 120.7:56 121.4:2003 122.2:561 124.4:337 125.2:224 126.4:725 127:100 129.8:8224 134.8:421 139.89999:561 141.8:352 142.39999:97 146:6553 14…
Unknown	4765	18.5512	1392.37	[73.1]	73.1	594503	1.15867e+06	3.01866e+06	5883293			-1	-1	-1	-1	50.4:1 51.2:3931 54.2:0 55:5358 56.2:395 56.9:2003 59.2:52502 60.1:7069 61:2685 62.1:1066 65.2:1028 67.3:8689 68.6:13967 70.1:8952 70.9:5791 73.1:594503 74.1:49268 75.1:30799 77.2:827 80.9:3303 82:2602 83.1:5233 83.9:2923 85:4660 87.1:22099 88.2:20411 89.1:73026 92.1:712 94.6:4279 95.2:4304 96.3:4299 97.8:3076 98.9:2950 101.1:4103 102:5743 103.9:7789 105.1:6492 105.1:6017 106.8:1594 111:1302 113.…
Unknown	4766	18.5534	1392.46	[309.8]	309.8	52150.8	97902.5	2.41291e+06	4.52975e+06			-1	-1	-1	-1	51.2:6029 52.2:8413 54:2386 59.1:72561 60.2:7345 63.1:2078 70.2:8916 73.1:593410 76.2:29082 77:6219 77.9:32878 79.1:7738 86.1:25357 89.1:86349 91:5195 94.8:6353 95.5:2207 98:4041 99.9:18604 100.5:10490 104:4942 105.8:2220 108:1818 112.2:4495 113.3:845 116.8:14275 121.7:2121 123.1:1541 124.6:3210 125.3:1989 127.5:2298 130:42890 131:14276 134.7:8049 141.89999:4301 146.89999:125214 148.89999:1168 15…
Unknown	4769	18.5601	1392.75	[282.7]	282.7	4644.84	4206.75	701767	635578			-1	-1	-1	-1	50.2:1942 51.3:3786 52.2:6005 53.2:4017 54:3247 54:5434 56.2:4722 56.9:5040 59.3:5898 60.1:1081 61.1:3319 62.9:2275 64:1138 65:1020 66:3175 68:3660 69:2780 70.7:1092 70.7:4768 73.1:54620 75:25646 79.2:192 81.2:7011 82.2:0 82.7:4864 83.3:5143 84.1:3503 84.1:6466 86:1028 87.9:5926 89:3222 90:2427 92.3:5521 93:4182 93.9:383 95.8:4259 97.2:3425 97.9:3306 98.9:3571 100.8:2395 102.1:2633 102.9:9963 103…
Unknown	4774	18.5711	1393.24	[295.1]	295.1	34434.8	28954.1	649619	546224			-1	-1	-1	-1	52.2:1735 53.3:7920 54.1:396 55.2:332 56.3:307 57.2:835 58.1:1587 59.1:5664 60.9:67 61.6:1141 63.2:1886 64.4:649 67.2:621 68.8:3050 68.8:5919 73.1:20690 75:4818 77:2354 78:16595 80.1:4477 83.9:1191 84.8:126 85.9:1695 87.9:8133 88.9:5297 90.9:1939 92.7:4236 92.7:1868 94.7:1120 94.7:360 95.9:607 96.9:1098 99.7:3236 100.3:3127 103:4128 105.8:1573 109.8:11 113.2:78 113.9:27 115.2:2798 115.2:704 119.1…
Unknown	4784	18.5933	1394.2	[258.6]	258.7	12362.8	24701.7	177180	354017			-1	-1	-1	-1	52.2:13613 53.2:1024 54.1:4162 55.8:413 58.2:2719 62:1157 63.8:2285 63.8:1360 66.2:597 68.1:877 71.7:4826 76:77 79:1377 82.7:1048 83.3:1145 92.8:3477 94.7:2589 96.3:1610 98.1:1568 99.1:1079 106.7:381 108.9:533 109.9:1444 111:2246 113:562 114.4:771 115.3:2220 120:1103 121.9:1264 125.7:27 133.7:1858 135.3:909 136.10001:1751 136.7:909 138.8:233 140.60001:2377 145.3:316 151.2:1481 153.3:371 153.8:961…
Unknown	4815	18.6619	1397.2	[238.5]	238.7	12072.5	24779.4	475756	976516			-1	-1	-1	-1	51.2:0 52.2:10769 53.2:17075 53.9:4007 55.1:0 57.2:0 58.1:0 61.2:2923 62.3:1819 64.1:1231 65.3:2722 67:2845 68.3:2487 69.2:2189 71:0 77.1:18499 79.1:0 81:1738 82.1:721 83.2:97627 84.3:4079 87:886 87.9:2740 90.8:6093 90.8:7289 91.2:6404 94:7069 95:973 96.7:4431 97.3:1432 98.1:124 98.8:1 99.4:0 100.1:1 100.8:4606 102:497 102.9:803 103.9:3916 103.9:11665 104.9:4014 106.9:372 109.4:312 109.9:2632 112…
Unknown	4820	18.673	1397.69	[146.9]	146.9	86040.4	168559	939540	1.84062e+06			-1	-1	-1	-1	51.3:5070 54.5:6602 56.2:9673 59:15392 60.2:4018 61.3:3916 64.1:1755 66.4:16852 73.1:139999 75.1:43350 76.2:82 80.1:5286 83.9:2576 84.7:9574 86:5388 87.1:401 88.7:2667 101:62965 102.8:13952 109.9:4296 114.9:0 116:51781 117.5:6862 117.5:4822 118.9:1188 121.2:1505 125.2:2201 131:9967 132.39999:8914 132.89999:29376 134.60001:4208 135.5:1203 136.7:801 142.8:10837 144.89999:37073 146.89999:86040 148.1…
Unknown	4827	18.6885	1398.36	[84.1]	84.1	28584.7	20853	268290	195721			-1	-1	-1	-1	54.1:1431 59.1:6365 61:972 63:827 73.1:4911 75.1:7777 84.1:28585 88:740 101:12544 102:921 102.8:1585 102.8:579 103.8:1847 106:1624 106.9:2246 108.2:29 109:93 115.3:9216 116:5585 117:1119 117.7:4755 129.10001:3462 131:770 132.89999:1320 142.60001:265 145:10840 146.8:569 148:3580 149.7:789 150.89999:2302 152.89999:1030 157.89999:723 160.60001:358 161.89999:356 170.39999:204 171.60001:1 172.5:1200 1…
Unknown	4829	18.6929	1398.56	[70.1]	70.1	110315	76836.2	386973	269533			-1	-1	-1	-1	51.2:0 59.2:512 61.1:2666 62.3:2418 64.4:1800 66.1:10228 68.2:12422 70.1:110315 77.1:1 78.1:4397 86.3:26792 87.2:461 88.9:4283 92:1 92.8:0 93.4:0 94.4:435 102.3:3466 102.9:3008 103.8:1866 108.9:2763 111.2:1 114.6:3005 116.1:1568 116.7:0 118.5:1621 119:0 120:0 122.8:1005 124.1:0 131.8:2308 132.60001:1764 139.5:10695 141.89999:9734 141.89999:9722 143:5925 147:3673 149.8:416 150.7:919 152.2:0 153.89…
Unknown	4830	18.6952	1398.65	[351.4]	351.4	10580.1	19855.1	415063	778924			-1	-1	-1	-1	58.2:15849 65:3527 70.2:107074 78.2:16567 87.8:683 88.5:5640 91.9:1268 91.9:1715 92.9:3861 96.1:21359 110.4:7418 110.4:9130 114.3:8855 115:2108 129.3:1 129.8:1104 135.89999:138 142.8:4691 142.8:9414 157.10001:1249 158.10001:1159 166.8:1628 171.8:2045 173.10001:3629 173.7:21122 175.10001:3938 179.8:2438 181:1026 190.7:1616 192.2:11 192.8:750 193.89999:1514 195.89999:6348 195.89999:574 199.3:2584 2…
Unknown	4840	18.7173	1399.62	[221.1]	220.9	8665.32	14645.9	1.06475e+06	1.79962e+06			-1	-1	-1	-1	53.3:36195 55.2:36246 57.2:1 58.3:108621 59.4:6092 63:699 63.9:5013 82.2:252015 83.2:2138 87.3:7981 94.9:7313 106:1736 108.3:4062 111.3:269316 116.8:1822 118.6:3848 119.7:1331 122.9:4722 126.2:1114 129.89999:9879 131.89999:2506 135.2:3425 136.5:2247 137:8380 138.10001:2943 141.3:17357 143.3:1779 152.5:130 154.2:22520 156.39999:12892 157.7:2894 158.7:2465 159.39999:1859 160.8:51 162.39999:365 164.…
tetradecane	4844	18.7262	1400.01	[57.2]	57.2	22948908	47468848	75386696	155934208	CCCCCCCCCCCCCC	BGHCVCJVXZWKCC-UHFFFAOYSA-N	954.13	561.9	633.333	849.679	50.3:57631 51.2:124302 52.2:54800 53.2:508334 55.2:4377847 57.2:22948908 58.3:865480 60.1:160 61.9:5773 63.1:18527 63.9:2918 65.1:120054 67.2:684873 69.2:2520637 71.2:16271337 72.3:222491 75.1:4499 77.2:123559 79.2:261795 80.2:43381 81.1:249747 82.2:391904 83.2:1808289 85.2:10069899 89:11263 89.6:3767 91.1:80026 92.2:15717 93:44394 95.2:73913 97.2:1130348 98.2:1706095 99.2:2617353 100.3:147125 10…
Unknown	4846	18.7306	1400.21	[107]	107.1	1718.59	2984.43	860442	1.49421e+06			-1	-1	-1	-1	50.2:7821 51.3:5035 52.2:3686 57.2:121 58.3:12526 59.3:875 59.9:5042 61.1:2044 62:6779 63.2:18155 69.2:3547 75.2:1095 81.2:14104 83.2:3900 85.2:101502 91.1:6973 93:5687 94.1:13587 97.1:19703 98.2:27101 99.2:21732 101.9:1705 102.9:1688 103.5:14978 104.1:11894 105:9559 107.1:1719 107.9:3719 112.2:22942 113.2:12396 114.2:52893 115.7:18625 115.7:7267 116.7:6009 119.2:10470 120:2558 120.5:12029 121.8:…
Unknown	4847	18.7328	1400.32	[173.7]	177	447.848	1000.39	863852	1.92964e+06			-1	-1	-1	-1	50.4:10545 52.3:10771 53.2:6429 55.2:30217 57.2:583 58.3:4686 59.3:3488 62:11875 63.1:2468 65.2:4927 67.2:11857 68.2:334263 75.1:63 77.1:1905 79.1:8911 81.2:19217 83.1:15237 90.2:5781 91.1:6526 92.1:3828 94:13122 95.3:11428 97.1:4634 103.6:58 104.2:864 105:22064 106.3:1070 107:365 108:2603 111.2:85131 115.4:1541 115.4:2612 116.9:246 117.8:5563 119.9:7444 119.9:2881 120.8:267 131:1457 134:1676 134…
Methyl glycocholate, 3TMS derivative	4850	18.7394	1400.62	[129]	129.2	10513.1	14585.9	8.32118e+06	11544854			-1	-1	-1	-1	50.3:15355 51.2:26983 52.3:12670 53.2:41817 55.2:441140 57.2:2330620 58.3:8553 60.9:1193 62.3:5812 63.2:7322 65.1:16954 67.2:105794 69.2:284381 71.2:1612523 72.3:25336 73.1:10586 75.1:7464 77.2:30865 79.1:53308 81.1:49397 83.2:187147 85.2:1048060 87.4:5550 88.4:3302 89.1:5113 89.9:3480 91:25173 92.3:3846 93:14191 95:10767 97.1:141394 98.2:205336 99.2:282701 100.3:53857 101.2:7170 102.1:2862 103:5…
Unknown	4856	18.7527	1401.24	[170.1]	170.1	6210.82	2662.15	158348	67873			-1	-1	-1	-1	61.3:711 73.1:17674 75.1:0 82.2:0 89.1:1 91.2:0 91.8:950 94.1:4532 102.2:3062 103.3:1475 103.9:2561 104.6:2421 104.6:2402 107.2:3437 107.2:1643 107.9:2327 107.9:1912 114.3:842 115:5516 120:728 120.6:0 121.8:1397 121.8:880 124:0 130.89999:529 131.8:276 133:1 134.10001:519 136:1172 137.8:0 142.39999:2086 147.7:1462 149.89999:973 150.89999:54 150.89999:509 152.7:198 159:620 159:223 163.5:210 164.7:6…
Unknown	4860	18.7616	1401.65	[70.3]	70.3	105186	95485.1	452712	410962			-1	-1	-1	-1	52.3:3480 54.1:38863 58.9:1753 60.1:117 63.9:5295 66:8971 70.3:105186 73:38921 75.9:12662 89:1563 89.7:1478 92:4692 93.1:1 96:578 101.9:7873 103.1:5027 104:5409 110:5450 114.9:394 117.5:1 118.3:2313 119.4:10057 119.9:3308 123.8:0 125.1:4467 132.39999:4729 135.7:1 136.2:594 151.89999:1 152.8:2544 157.5:8008 159.10001:1511 164.3:638 165.8:259 171.5:2233 175.60001:1 177.39999:208 178.8:52 179.60001:…
Unknown	4863	18.7682	1401.96	[240.8]	240.9	35043	90589.7	461823	1.19386e+06			-1	-1	-1	-1	54.3:29960 56.2:710 59.9:1704 66.3:17723 73.1:1 76:25492 84.1:10345 87.1:284 88:2384 92:10843 96:18446 101.1:9038 105.5:7354 106.6:1608 107.2:1 110.6:7346 114.8:1447 119:5655 119.8:2969 119.8:3953 120.3:4711 123.7:2187 125.1:2293 134.2:3539 134.2:2099 134.2:774 143.2:6467 143.2:3988 144.5:2414 145.7:3667 150.7:824 151.8:1528 156.10001:1799 156.8:1 157.89999:2933 160.39999:2516 161.60001:1896 162.…
Unknown	4864	18.7704	1402.07	[84.2]	84.2	39544.4	42148.8	449678	479294			-1	-1	-1	-1	50.3:1 51.2:3948 52.3:4651 53.2:1 55.1:0 57.2:0 58.3:1 59.3:1 60.6:4059 61.2:903 63:1 65.2:0 67:0 68.1:0 69.2:1 71.2:0 75.1:0 77.1:859 78.2:50539 79.1:1 80.4:3719 81.1:1 82.2:0 83.1:0 84.2:39544 85.2:1 87.9:1557 88.8:1968 89.3:1 91:0 91.9:10181 91.9:13838 93:1785 93.8:342 95:1 97.1:1 98.1:0 99:0 99:0 100.3:1 101.4:5035 102.8:645 104.1:1 105:1 105:10472 106.1:486 108:1771 111.2:1 112.2:0 113.2:1 1…
Unknown	4867	18.7771	1402.38	[181.9,183.8]	182	69194.9	154240	790502	1.76208e+06			-1	-1	-1	-1	50.2:0 51.2:5137 59.1:0 60.4:2570 61.6:6063 63:755 64.5:6471 65.2:1 67.3:1 73.1:20828 74.1:12326 75.1:1 76.1:24900 77.2:1715 78.2:49472 79.1:0 80.9:1 86.7:3538 87.4:0 88.9:0 90.1:386 91:0 93.2:1365 94:8202 95.1:1881 96:10005 102:10252 102.7:561 103.4:5062 104.4:1855 105:0 106:7824 106.9:1977 108.3:2276 109.7:3204 110.4:6193 114.9:8470 115.9:530 116.6:176 116.6:1 117.9:2852 120:8336 122:3645 122.9…
Unknown	4869	18.7815	1402.58	[242.6]	242.7	34950.2	82154.5	491619	1.15561e+06			-1	-1	-1	-1	54:15059 56.3:38700 60:4250 60:6494 62:5169 66.3:5048 69.9:33824 80.1:16739 83.8:19471 87.7:272 93.8:7693 93.8:2897 100.9:7091 107.9:4328 109.6:2458 125.1:2023 128.3:6351 134.89999:1605 137.2:1541 143:6160 150.39999:689 156:19466 157.60001:3320 158.10001:3219 160.60001:1974 164.3:1140 167.10001:1663 169.5:4454 175:1905 181.89999:33601 185.89999:8815 187:1748 187.60001:3347 202.60001:610 208.89999…
Unknown	4901	18.8524	1405.88	[173.8]	173.8	54050.2	111578	419224	865422			-1	-1	-1	-1	51.2:12744 54.1:11469 56.1:5608 60:3315 63.8:1236 66.2:4793 66.2:6124 70.5:2221 73.1:1 74.1:6810 78:40304 80.2:6839 84.1:9205 92.9:5448 93.9:41 114.8:3833 118.1:891 128.89999:5721 130.60001:2080 132.10001:1789 142.39999:3559 142.39999:1377 146.3:13679 148:6576 155:11765 156.8:3298 157.60001:3632 168:2086 173.8:54050 173.8:47166 174.8:745 178:1721 180:409 182.3:1 182.8:841 184.60001:690 187.5:155 …
Unknown	4905	18.8612	1406.29	[226.6]	226.5	8293.45	15331.6	301066	556561			-1	-1	-1	-1	50.2:1022 53.2:17718 57.2:1 59.2:1269 61.9:275 63:4092 63.9:1052 67:1924 67.8:0 71.1:0 76:13270 77.2:419 79.1:487 81.3:990 82.2:4737 82.9:2725 83.5:5162 84.2:3047 85:5277 86.1:10739 87.2:2427 89:5805 90:3448 90.9:3030 92.3:2587 95.9:0 97.9:1344 97.9:1192 99.2:3749 100:5887 103.1:1 104:3636 104.9:1399 105.9:1905 107:892 108.9:1518 110.9:2077 110.9:4776 112.3:1907 112.9:1338 117.8:1645 121.6:650 12…
Unknown	4906	18.8634	1406.39	[258.1]	258.1	6854.37	7370.41	344395	370323			-1	-1	-1	-1	52.2:1 53.2:2800 59.2:4761 61.1:2414 63.1:3757 64.3:972 65.1:3918 66:1 67.1:1959 70.2:8106 71.2:1 73.1:0 74.1:1049 76.3:4251 77.1:2712 80.2:6374 81.2:440 82:384 83:6755 85.2:6630 85.9:3544 86.9:1436 88.7:1911 89.4:152 91:1814 93:0 96.8:1 98:1524 99.8:1242 100.3:4634 104.1:3307 104.9:2958 106:1821 107.7:1760 107.7:1587 109.4:1405 111.6:6702 111.6:2180 113.1:3511 115.5:2587 115.5:4576 116.9:3188 11…
Unknown	4910	18.8723	1406.8	[336.8]	337.2	105.065	123.678	271325	319392			-1	-1	-1	-1	53.2:21466 54.1:1637 57:3837 60.5:71 63.9:2368 66.1:804 66.8:5608 67.4:1316 71.1:3636 75.1:4793 76:3866 77.1:5213 79.1:1958 80.2:6551 83.1:0 84.5:3556 85.1:1366 86.1:5145 87:1 88.3:625 89:699 91.9:147 93.1:1237 94.8:129 96:3215 96.7:2468 96.7:327 98:1145 100.1:2320 102.1:3143 102.9:0 103.9:1277 104.9:162 106.6:1837 107.7:533 109.8:1162 113.7:289 116:2136 118.6:2163 120:2464 121.1:118 121.7:94 122…
Unknown	4911	18.8745	1406.91	[146.8]	147	5509.22	3257.91	288946	170870			-1	-1	-1	-1	50.3:11002 51.3:5629 52.2:2989 55.2:2273 61.4:2812 65.9:701 66.9:2735 71.2:833 73.1:2 74.1:1111 77.3:5318 78.1:2695 80.1:4108 82.3:413 83.2:306 87.9:2112 90:1598 90.7:1173 91.7:184 93.1:3185 98:1686 99.7:1 102.7:402 104:2023 106.7:1803 109.1:1799 109.1:2631 111.8:2038 112.5:2434 115.1:1755 116:1 116.8:2624 119.4:6683 119.9:2798 120.5:2505 121.2:463 121.9:373 125.4:1367 128.39999:54 132.8:1570 134…
Unknown	4917	18.8878	1407.53	[73.1]	73.1	98869.1	312895	620614	1.96408e+06			-1	-1	-1	-1	52.3:11891 53.3:10471 54.1:4325 59.1:6889 61.1:2389 64.1:61 65:772 65.9:2810 68.2:247 70.1:2887 73.1:98869 75.1:7008 81.1:544 82.3:1255 83.7:7730 84.9:5311 85.5:0 86.2:3185 89:1641 90:345 96:309 100.9:2099 106.1:2309 108.8:26 110.9:1 111.5:953 112.4:1 113.4:353 114.6:2694 116.5:1518 116.5:3279 118.2:595 118.9:6134 121.2:423 125.6:0 126.7:753 127.8:1568 128.5:2775 130:1365 130.89999:5954 132.8:462…
Unknown	4921	18.8967	1407.94	[146.8]	146.8	10855.9	6274.01	377776	218331			-1	-1	-1	-1	51.2:4833 55.2:781 56.1:1841 57.8:8774 68:773 70.3:923 70.8:3682 71.3:10040 73.1:1622 77.1:3612 82.2:1227 87:506 89.8:46 91.1:1877 94.1:2557 96.6:2305 97.4:0 99:5583 103.4:1971 104:1 104.7:928 105.9:1811 107.7:519 113.7:288 115.3:2093 117.1:800 118.6:1789 121:1186 122.2:2122 124.4:387 129.5:435 133.60001:1160 136.60001:1 137.89999:888 139.89999:1719 144:1820 145:614 145:613 146.8:10856 146.8:1360…
Unknown	4926	18.9077	1408.45	[412.5]	412.1	4495.66	3049.95	320908	217710			-1	-1	-1	-1	52.2:306 56:302 58.1:3108 63.8:442 66.2:1380 69.2:3249 70:2489 71.1:3837 73.1:3697 75.1:5566 77.3:6639 79.1:3930 84.1:386 87:1976 91:1116 93.1:2193 94:1940 102.9:283 106.8:1510 107.7:190 108.3:2162 110.8:807 111.9:602 113.1:2006 114.6:2205 116.2:466 118.8:1360 120.1:3389 121.7:882 123.7:1600 127.2:882 128.89999:14 130.10001:903 133.8:1929 136.2:1095 138.89999:1328 139.5:940 141.39999:30 144.5:438…
Unknown	4941	18.9409	1410	[97]	97	44926.1	104013	643949	1.49087e+06			-1	-1	-1	-1	50.2:1935 52.2:6458 55.1:7226 56.1:4202 57.2:19917 59:3211 61.2:1 61.8:150 64.2:1667 64.9:4557 66.2:5582 67.2:4238 68.1:5020 68.7:9591 69.2:24664 70.1:7052 73.1:5919 75.1:8073 77:17695 79.1:8118 80.4:7585 83:5076 84:3651 89.2:7006 90.7:11000 91.3:9893 92.1:973 92.8:18283 92.8:12141 94.1:4364 95:5694 97:44926 99.3:5060 102:611 103.9:5184 105:5876 105:8253 107:13326 108.4:8547 109:2683 110:3713 111…
Unknown	4944	18.9476	1410.31	[102]	102	71559.3	181013	612425	1.54916e+06			-1	-1	-1	-1	51.3:9052 52.2:10690 53.1:26024 54.2:3920 55:11527 57.2:16929 58:5021 58.8:6736 60:1423 62.1:2728 63.1:2453 65.1:4652 65.9:3110 67.1:7034 69.3:585 71.1:0 72.1:4751 76.1:6353 77.2:10722 79.1:23187 81.1:15246 82.2:269 85:2373 86.1:3585 86.9:2054 87.9:997 88.8:7103 95.2:12279 95.9:2938 99.1:26439 100.7:2487 102:71559 103:713 104:16895 108.1:350 109:5618 110:4818 110.9:3082 113.9:687 116:9121 116.8:1…
Unknown	4997	19.0649	1415.77	[97.1]	97.1	209128	490036	1.88635e+06	4.42016e+06			-1	-1	-1	-1	50.2:5701 51.2:25826 52.2:10831 53.1:14008 55.2:55823 56.3:81264 57.2:162708 58.2:6230 60.2:2649 61.1:2175 63.2:3018 64.2:2564 65.2:19268 67.2:50736 69.2:47102 74.2:18506 75.1:6230 76.1:9780 77.2:37635 79.1:80022 81.1:33695 82.3:26671 83.2:16139 83.9:21396 84.5:7457 86.1:6864 87.5:8563 91:39371 92.9:18606 95.1:27270 95.1:21012 97.1:209128 99.3:125221 102:65120 104.1:23629 105:10328 105.8:377 106.…
Unknown	5001	19.0738	1416.18	[73.1]	73.1	160900	338854	1.6667e+06	3.51006e+06			-1	-1	-1	-1	50.2:8214 51.3:17565 53.2:28873 55.1:29772 56.2:8628 57.2:17550 58.3:9230 59.2:36622 66:5721 67:53315 68.2:17416 69.1:3979 73.1:160900 74.1:16618 75.1:19030 78.1:38542 80.3:14853 81.1:15245 82.1:35770 83.2:10955 84.2:16138 86.1:23154 87.7:4567 88.6:12296 89.1:22945 89.1:22440 91:38527 93:30173 95:20231 97.1:966 99.2:37571 100.1:34081 101:3273 102.1:17660 103.1:13142 104.1:27068 104.8:23326 106.7:…
Unknown	5003	19.0782	1416.38	[154.2]	154.2	82678.8	177335	847523	1.81783e+06			-1	-1	-1	-1	50.2:6001 52.2:8881 54.1:9484 60.9:5405 62.1:2495 64:4346 70.1:22425 71.2:8443 77.2:29865 77.9:43529 82.2:7205 83.1:23164 87.1:5257 94.3:12332 98.3:297 102:13809 103.8:25699 109:3160 111.1:4251 112.9:5220 113.8:8454 115:3054 119.1:8735 120.7:12972 121.4:11434 124.9:2762 125.9:5563 126.9:4852 128.10001:10791 129.10001:16336 129.89999:407 130.5:20769 135.3:5599 136.89999:2548 137.60001:3405 139.899…
Unknown	5012	19.0982	1417.31	[146]	145.6	6099.57	8354.89	313596	429549			-1	-1	-1	-1	51.4:3502 52.2:9523 53.3:8226 56.2:260 60:1943 63:1369 71.2:7999 71.9:6740 75.1:9264 78.1:27751 79.1:1907 80.1:13574 81.2:2619 82.1:4344 83.1:722 84:1326 84.9:6110 86.1:4763 86.1:4463 87.4:2328 87.4:3453 89:361 91.1:2907 92.9:985 104.9:1379 104.9:4452 106.1:246 108.3:745 110.4:1156 111.3:1008 112:2495 113:2701 114.7:171 117.7:292 120.2:3558 124.5:920 125.7:198 127.7:1740 128.39999:2395 132:2758 1…
Unknown	5045	19.1712	1420.71	[246.7]	247	5571.31	6865.46	237485	292650			-1	-1	-1	-1	50.3:1650 51.2:2120 55.1:497 57.1:3659 59.1:1515 60:2382 61.1:940 63:935 64.1:585 65:355 66.1:2079 67.1:682 67.8:2625 69.2:1935 71.3:3220 73.1:14706 74:1131 75.1:644 80.2:6654 82.7:942 82.7:162 84.2:1120 85:1397 85.6:553 85.6:1366 86.8:643 90:1762 93:568 93.8:1324 95.2:2666 96.9:1455 99.9:845 101.3:4302 102.6:912 103.1:4535 106:112 107:1346 108.2:1 109.1:799 112:1760 113.1:64 114.6:7 115.7:1952 1…
Unknown	5057	19.1978	1421.94	[178.7]	178.9	15096	31615.4	269058	563485			-1	-1	-1	-1	50.3:500 53.2:3815 55.2:3143 55.2:4756 56:2818 57:2151 58.9:3283 61.2:1552 61.9:194 63.1:910 63.9:1215 65.3:1868 66:241 67:603 68.2:844 69.1:4081 70.1:4647 71:3035 73:19222 76.2:6450 78.3:9706 82:373 85.1:1775 87.2:1498 91:3077 92.9:916 93.8:3170 96.7:690 98:1232 99.3:1226 99.8:2356 101.2:3181 101.2:3635 103.2:2694 104.9:9 106.9:917 108:465 111.3:972 113.7:218 114.6:24 115.4:2920 115.9:826 121.6:…
Unknown	5099	19.2908	1426.27	[174]	174	8784.23	15143	207784	358197			-1	-1	-1	-1	51.2:11063 52.3:2023 53.3:5167 54.1:1349 58:3555 58.8:1373 58.8:1310 60.3:258 61.8:45 63.1:1404 65.1:48 69.2:714 70.2:2680 71.6:4683 73.1:0 77.1:2763 78:7465 80.3:8567 83.9:276 83.9:2753 86.1:1007 87.1:1454 94.9:40 98.9:324 100.4:893 100.9:4488 101.8:1572 102.7:510 102.7:971 103.7:2106 106.8:448 108:609 109.8:262 110.4:671 111.1:744 115.5:1136 116.7:2610 120:1216 124.7:1195 126.2:1395 127.9:101 1…
Unknown	5113	19.3218	1427.71	[232.5]	232.8	6088.1	8711.16	267374	382571			-1	-1	-1	-1	52.2:2630 54.3:3442 56.2:1555 56.8:5534 56.8:1185 60.9:1618 63.1:327 63.7:2461 66.2:10 66.9:3460 70.1:699 71.1:437 75:7364 82:1523 82.5:5367 84.2:3924 84.9:878 87.3:402 87.3:983 88:419 88.9:3136 91.9:1324 93.1:1738 95:4415 95:1463 96.9:5162 98.9:4029 98.9:6889 101.1:6807 102.9:1265 106:495 106.8:3608 107.9:627 110.5:4156 112:1260 112.6:1651 113.3:518 114.1:356 115.2:1264 116.8:4758 117.8:137 118.…
Unknown	5132	19.3639	1429.67	[135.9]	135.9	8157.88	17243.5	279061	589856			-1	-1	-1	-1	50.3:4404 52.2:12142 53.3:8083 55.3:4004 55.3:6834 56.3:1633 57.1:1035 58.1:5013 61.1:413 63.3:1899 64:1751 66:816 66.6:6245 66.6:2359 68:2530 70:1086 70.7:2771 71.6:1194 75.1:2392 77.1:4870 82.3:1615 82.3:1050 82.9:1430 84:784 85.7:594 87.7:980 89:453 91.1:1234 93:2626 96.7:3247 96.7:1578 98.1:546 99.2:127 99.7:7195 101.2:122 103.9:2131 103.9:2229 105:477 106:3472 106.6:1098 107.6:601 109.1:3698…
Unknown	5140	19.3816	1430.49	[504.5,392.9]	504.3	6556.57	12467.4	625230	1.18888e+06			-1	-1	-1	-1	50.2:4999 51.2:1883 52.3:12085 53.1:17588 55.2:162 59:3295 63:2179 65:2632 66:1798 69.3:23353 70.2:4860 73:31852 77.1:54663 78.3:41971 79.1:10126 80.3:4021 81.1:5758 82.9:4236 84.8:5498 89:1226 91.8:1968 93:646 93.8:6487 97.8:3156 99.9:7764 101.4:1974 103.6:4289 104.4:3676 107.9:1582 108.4:4549 109.6:3444 112:663 114.3:732 115.7:4395 119:2584 119.9:13103 121.4:835 122:1954 122.6:430 124.3:556 125…
Unknown	5142	19.386	1430.7	[73.1]	73.1	107095	177868	711896	1.18235e+06			-1	-1	-1	-1	50.3:2851 51.3:5556 54.2:8036 58.2:2666 60.3:1920 60.9:1435 62.2:1459 63.3:1394 64.1:1177 64.7:6831 66.2:3090 67.2:1 69.1:1210 71.1:1357 71.7:8954 73.1:107095 74:5604 75.1:13404 76.1:13380 77:53492 81.1:4396 82.8:1169 83.7:1162 84.4:4709 85.6:4699 86.1:496 87.4:2130 87.4:2469 89.1:1588 91.2:1927 94.8:4295 96.2:3482 97.2:923 98.7:935 99.9:1014 101.3:1381 103.1:2423 106.8:6289 108.8:3952 110.9:3314…
Unknown	5161	19.4281	1432.66	[206.7]	206.7	24767.7	39646.7	466919	747416			-1	-1	-1	-1	50.2:4999 51.3:1495 52.2:7029 56.2:8773 56.7:4858 59:9087 61.1:383 63.2:400 65.2:433 67.1:1712 68.1:4468 71.4:1295 73.2:22082 74.1:7569 75.1:1 77.2:1513 80.9:1 82.2:3383 83.5:136 87:2027 89.2:2716 92.9:383 94.1:1863 94.8:2809 96.8:273 98:1518 98:1047 98.6:1880 100.1:407 102.9:3685 104.4:2351 105.8:0 106.4:321 106.9:3491 108:2524 108.8:626 109.8:1112 110.8:1414 112.9:611 114.7:0 118:2372 118.8:800…
Unknown	5164	19.4348	1432.96	[397]	397	34566.7	75936.1	468887	1.03005e+06			-1	-1	-1	-1	50.4:19264 50.4:19264 51.3:0 54.1:0 56:193 59.2:5398 66:1039 67.8:1 69.1:1 72:2236 75.1:2506 76.1:6906 77.8:3402 79.2:1 80.1:6951 82.7:1506 83.6:0 86:1708 88:1938 89:306 90.8:682 91.5:1158 92.2:5136 93:2465 94:5447 96:2397 99.9:7970 101.7:3446 103.7:2355 105.6:5839 109.8:1607 110.8:1139 112.5:1 113.3:767 115.1:1291 116:1 119:2885 119.9:412 122.1:0 123.6:776 126.6:275 128.3:1611 132.60001:1861 134…
Unknown	5165	19.437	1433.07	[307.9]	307.9	17949.9	33846	362067	682708			-1	-1	-1	-1	50.3:15467 53.2:12573 56.8:1303 57.3:3643 60.9:1281 61.5:2987 62.2:2578 65.1:438 70.9:0 71.7:1184 73.1:27474 81.1:1009 84.1:2222 87.1:2429 87.1:2918 91.9:4751 94.1:3833 95:3794 97.3:1978 98.2:920 98.9:101 99.9:431 102.7:3219 103.3:2569 104.7:2823 105.6:5377 106.6:663 107.9:1340 108.4:2715 109.1:359 110:718 114.8:1851 125.4:0 127.9:1807 129.8:2477 129.8:3802 130.8:3872 132.60001:687 132.60001:7089…
Unknown	5166	19.4392	1433.17	[308.6]	308.9	4510.87	4875.27	336606	363797			-1	-1	-1	-1	50.2:8011 51.1:1 54:1470 55.9:0 58.3:1 59.2:1758 61.2:497 62.3:234 63.3:700 66.1:1252 67.2:1101 69:11598 70.4:791 73.1:26178 74:3704 75.1:1113 77:769 78.1:30561 79.1:1160 80.4:660 81.5:7643 82.8:0 84.9:1 85.4:1 86:1510 89:204 89.8:50 90.9:0 91.6:30 93:3958 96:2687 97.1:1032 100:2679 101.1:2058 101.8:3123 110.3:1163 110.9:341 111.5:653 112.4:788 114.5:1009 117.2:3895 117.2:2063 118.5:1217 120.1:27…
Unknown	5182	19.4746	1434.82	[242.6]	242.6	5872.12	11001	242687	454657			-1	-1	-1	-1	52.2:8633 62:550 64:5341 65.4:5649 66:1049 71:2967 72:1659 76:11128 77.1:3737 78.1:13146 79.2:11727 81.1:3661 81.6:2787 82.2:1185 83:461 83.9:1273 84.9:2205 86.2:2827 89.1:1972 91.1:2450 93.1:771 93.1:7264 95.9:606 103.8:3082 105.9:1968 106.7:899 107.8:1861 108.5:766 110.8:617 114:605 116.9:376 126.7:895 127.3:1003 130:5841 131.89999:2107 133:2943 137.2:2509 139.7:462 141.3:1747 146.89999:3041 15…
Unknown	5186	19.4835	1435.23	[245.2]	244.7	2277.2	4916.81	346596	748354			-1	-1	-1	-1	50.3:5310 51.3:8144 53.2:2872 54:1044 55.1:2735 55.1:1738 56:2031 57.2:1801 58.1:2130 59.1:2310 60.7:1695 62.9:703 63.4:2662 65.1:155 66.9:1814 68.3:5187 69.2:3417 70.1:5013 73.1:17904 74.1:401 75.1:30636 76.1:13384 85.5:385 86.2:329 87.1:958 88.7:469 89.6:428 90.7:2182 93.9:3645 95:1907 97.6:3121 99:1498 99.9:1467 100.9:2461 103.1:12697 105:5392 107:1439 110.1:1682 111.9:1226 113:1379 114.5:2176…
Unknown	5239	19.6008	1440.69	[141.1]	140.9	12301	28409.2	334192	771817			-1	-1	-1	-1	53.3:8284 57.1:1623 58.1:2414 60.9:3232 60.9:2740 60.9:1716 63.9:1691 65.8:2901 66.5:1760 67:2276 67.9:6653 69.1:8384 70.1:2734 71.1:632 72.2:4501 73:3180 75.1:1587 77.2:4203 81:6412 82:0 84.9:1814 86:1863 87.1:1157 87.9:871 88.9:4001 91.6:2358 93.6:7329 95:1 95.9:297 98.4:1300 101:689 102.1:561 103.4:2945 104.1:2130 104.9:1157 105.5:200 107.9:2603 108.5:1963 111:859 112.8:1645 114.3:95 114.8:854…
Unknown	5246	19.6163	1441.41	[169.2]	169.2	61261.4	118697	506072	980538			-1	-1	-1	-1	50.2:12261 51.3:8182 53.9:3406 55.2:1946 56.3:5289 58.1:5133 59.1:4190 59.9:2239 62.1:2673 63.1:4690 64.5:3033 70:1007 71.2:1284 71.9:2061 75:5687 76.1:11822 77.1:976 79.1:9124 80.2:7386 81.2:2118 82.9:370 82.9:5784 84:3810 85.3:2205 88.9:1221 89.6:4770 91.1:3229 93:4075 94:3672 96.1:4465 97.8:1430 98.9:3063 99.9:1782 102.5:754 103:4820 105.2:2457 106.4:2574 107:1072 111:351 113:11299 113.7:1852 …
Unknown	5252	19.6296	1442.03	[77.2]	77	28391.8	32665	180389	207539			-1	-1	-1	-1	52.2:5506 57.9:242 60.8:970 62:1705 63:1331 64.2:3085 67.4:348 71.3:1247 71.3:2345 77:28392 79.1:5378 81.2:1108 82.5:1456 84.1:1049 85:239 86:1510 87.1:352 89:910 92.2:1162 94.1:1361 96.9:2705 99.9:2092 101:1013 101:1147 102.1:998 103.8:592 104.8:312 106.4:559 108.9:1775 108.9:1470 109.8:402 110.7:246 112.8:831 114.5:1457 119:1325 120:532 121.5:230 125.9:324 127.3:542 127.9:460 128.89999:407 130.…
Unknown	5299	19.7337	1446.87	[155.8]	155.9	37938	75575.7	311737	621006			-1	-1	-1	-1	51.2:6152 52.1:3519 54.2:1462 55.9:665 57.2:1 58.1:1713 61:784 63.1:2019 65.3:0 65.9:1227 67.8:268 68.4:1 70.1:3537 71.2:4774 73.9:191 75.1:6242 76.1:9384 77.2:6697 79.1:14077 82.3:1523 82.3:1397 83.6:1 84.1:1252 85.4:6347 85.4:4532 88.9:1665 89.6:880 91.8:3577 92.9:2921 94.9:989 97.5:912 99.2:2758 99.9:1786 100.5:4235 101.2:2629 101.9:2466 103:1466 106:933 109.3:1592 110:528 110.7:1480 112:550 1…
Unknown	5324	19.789	1449.44	[57.3]	57.2	11095.8	8274.47	186113	138789			-1	-1	-1	-1	54:749 54.8:251 57.2:11096 58.3:11 60.1:1053 60.6:1634 66.1:681 67.1:1116 69.2:2702 70.2:2078 71.3:351 77.1:508 78.1:14954 79.1:4950 82.9:661 85.2:2136 86:2274 88.9:1 89.8:429 90.9:154 93:1438 96.1:2257 97:1429 97.7:295 98.8:2417 98.8:4832 99.7:1137 101.2:289 102.6:239 102.6:1041 104.1:2037 104.9:1202 106.8:608 110:0 110.6:1075 115.7:3464 120.6:3102 121.8:1035 123.9:2132 125.3:0 128.5:2538 128.5:…
Unknown	5353	19.8532	1452.43	[136.7]	136.7	10239.4	21730.2	194661	413110			-1	-1	-1	-1	50.2:936 51.2:2032 52.2:2984 57.2:4781 58.4:1580 64.3:942 66:112 67.1:395 68.8:8294 68.8:7343 78.1:1198 81.9:4956 82.4:3181 83.1:2392 84.1:979 87.1:298 87.9:2009 89.2:159 91.6:42 95:2227 103.1:200 106.1:131 106.9:1449 107.8:1053 110.7:2 112.5:242 118.6:2221 121.2:1807 122.4:108 124.3:496 125.8:1161 128.2:1 135:879 136:116 136.7:10239 138.3:1184 141.2:1723 143.7:329 145.8:883 146.7:3370 149.60001:…
Unknown	5373	19.8975	1454.49	[73]	73.1	22578.5	48929.9	436406	945738			-1	-1	-1	-1	54.2:3413 55.1:4255 58.1:2668 59.2:4502 60.5:3482 61.2:1519 63:2450 64.1:0 64.7:1913 65.5:3640 67:7376 70.1:4658 73.1:22578 75.1:53670 79:18556 80.8:3637 82.2:5181 83.1:1 89:2108 90:3361 91:1224 91.7:4338 92.2:7204 93.2:1213 94.1:1500 95.1:603 95.9:1164 98.1:2623 101.7:836 103.7:1 105.2:2520 107.8:1549 108.8:465 110:3459 110:2333 110.9:1249 112.5:188 114.3:1653 115.6:6721 117:15138 117.9:2085 118…
Unknown	5375	19.9019	1454.69	[228.6]	228.7	29401.8	60350.2	543772	1.11615e+06			-1	-1	-1	-1	50.3:3622 51.2:7790 52.3:12076 53.2:16646 56:2097 57.3:198 58.3:2861 62.1:1 63.8:576 66.1:1402 67:4213 68:4851 69:6707 70.2:6297 70.8:2930 71.4:1 73:27370 74:13944 75.1:55129 76.1:9414 77:4483 79.1:14703 81.2:2712 85:1761 87.1:1432 87.9:2179 97:4673 98.9:2620 99.9:3892 100.5:1767 103:1706 104.3:1 105.1:1700 106.5:1347 107.1:1584 108.9:1167 110:2489 111.3:919 112.8:0 117:22715 118.6:2513 120.8:392…
Unknown	5381	19.9152	1455.31	[295.4]	295.1	1256.79	1487.19	286225	338699			-1	-1	-1	-1	50.3:8442 52.2:4876 54.9:3610 56.1:3270 59.3:357 60.1:3280 60.8:2863 62:2859 63.8:293 64.5:713 65.4:7077 65.9:1155 68.1:7 70:2297 76.2:9101 77.1:2294 79.1:15186 81.2:2962 81.2:1125 84.3:1223 87.6:291 88.7:915 90.2:1834 93:2387 96.3:808 96.9:2968 97.5:326 99.9:3429 100.8:216 102.5:2600 103.9:647 105.9:1512 105.9:2441 107.2:1725 110:804 110.9:0 114.6:2234 116.1:2276 117:1422 119:97 120:2515 120:309…
Unknown	5383	19.9196	1455.52	[466.6]	466.3	4310.77	7371.07	226139	386680			-1	-1	-1	-1	50.2:8092 51.2:1311 53.2:7335 54:3 55:374 55.9:4905 64.2:2051 66.3:169 76.1:1245 83.1:1050 87.1:570 89.1:408 90.8:22 94:3716 95:302 100.9:108 102.2:1285 104.1:3181 107.8:2008 110.1:2754 113.8:2010 117.8:5938 124.8:136 132.5:366 133.89999:2973 135.7:1 138.2:2190 138.8:2260 141.5:1847 146.8:6750 152.3:5165 153:4482 156.7:167 158.7:1 160.8:1019 164.89999:0 166.8:30 170.89999:2331 177.10001:676 179.3…
Unknown	5399	19.9551	1457.17	[85.3]	85.3	9406.43	14208.2	225789	341048			-1	-1	-1	-1	52.2:911 55.1:1140 57.1:14730 59:1812 59:546 62:1587 64.1:1499 70:1886 70.7:3167 71.3:14046 81.7:1192 82.2:4809 84.2:1528 84.8:7041 85.3:9406 86.3:2449 88.7:1336 90.7:3044 97.1:1637 98.1:1007 99.1:6726 99.1:5338 108.2:832 111.1:1380 113.1:2126 113.8:88 116.4:1685 124:142 125.6:1377 126.2:1427 126.7:1345 135:154 139.7:502 142.8:351 144.3:867 147.8:2770 148.7:1791 152.60001:149 154.8:5301 158:665 1…
Unknown	5402	19.9617	1457.47	[240.6]	240.6	8413.8	6824.26	408375	331225			-1	-1	-1	-1	53.2:10850 54.3:1 57.1:6405 60.8:1321 64.2:1166 64.9:3582 65.4:4805 66.1:2924 67.1:4238 67.1:6032 68:4022 70:13460 71.1:9690 75.9:8441 79.2:13856 80.1:11072 82.7:1196 89.7:1 91.3:2394 92.9:3988 92.9:4363 94.7:1915 95.7:3865 98:3003 100.9:5348 102.1:1641 102.9:1365 104.3:148 105.2:1266 105.8:1637 109.2:408 111:805 111.8:2910 114.8:3839 116.8:4950 117.5:1 120.1:314 123:520 123:2030 124.4:227 125.3:…
Unknown	5405	19.9684	1457.78	[181.8]	181.8	87453.1	202766	786508	1.82357e+06			-1	-1	-1	-1	53.3:15615 55.1:1325 58.1:20492 59.9:745 61.1:3539 61.9:154 63.3:2518 64.2:1215 67.4:6607 70.3:12193 71.2:8468 75.1:8137 76.3:11250 80.3:19547 83.5:1401 84.1:2175 85.2:1635 88:2863 89.4:1779 91.1:9625 92.1:12787 94:6675 96:4857 97.1:2715 98:4266 98.9:8937 99.8:5156 102.4:4014 103:2823 103.9:3272 108.2:1199 111.8:1196 112.9:4445 115.7:2723 121:3753 122.2:6464 122.2:7906 126.5:9438 129.8:6730 130.8…
Unknown	5407	19.9728	1457.99	[183.6]	183.6	69390.4	163918	691810	1.63423e+06			-1	-1	-1	-1	50.2:2508 52.2:20357 53.1:13559 56.1:10915 56.1:2157 57.2:1638 58.9:1 61:4138 66.1:4441 66.9:2482 68.2:3895 69.2:0 71:5046 72.1:3679 79.1:12750 80.1:18931 83.7:132 84.5:9068 84.5:3152 86.2:6587 87.8:3160 89.8:1688 91.7:946 95:841 96.9:4281 101:5079 102.6:2147 103.6:190 104.2:5073 104.2:2227 106:1629 107.4:0 109:0 109.9:2455 110.9:274 112.8:6794 114.8:3686 116.7:2396 117.6:2509 118.9:2437 119.9:14…
Unknown	5417	19.9949	1459.02	[73.1]	73.1	37486.7	75137.7	654543	1.31195e+06			-1	-1	-1	-1	50.2:6347 51.2:805 54.3:4944 55.2:3826 57:9708 58.2:10500 59.9:2168 61:1662 62.3:1476 62.9:6214 62.9:5357 65.9:0 66.7:2223 69.2:18435 70.2:11312 71.1:0 73.1:37487 75.1:12463 77.2:18849 79.2:3431 81:8777 81.9:3097 84:5609 84.9:808 85.5:6276 86.1:3398 87.1:3295 88.2:3310 89:1 90.9:2554 91.9:8132 96.1:5382 97.8:2023 99.1:7365 99.1:7686 100:21352 104:5927 104.8:2790 107.9:3948 108.9:2457 111.2:2108 1…
Unknown	5418	19.9971	1459.12	[58]	58	35918.6	79888.5	638886	1.42098e+06			-1	-1	-1	-1	51.3:2310 52.2:8568 53.1:7668 56.3:10315 58:35919 58:45079 61.2:1718 63.2:7285 64.1:1853 64.9:2158 66:0 71.7:7824 71.7:9589 73:20972 75.1:10638 76.1:6163 77.2:31231 82.6:2771 85.6:3169 86:10046 87.2:4612 87.2:8056 87.9:3314 87.9:3427 89.7:4087 93.9:1727 95.1:3802 96.3:6453 102.8:4442 104.1:6989 107.3:1943 110.5:200 112:410 113.9:3677 114.9:1728 117:1322 118:2520 120.1:3348 120.9:8288 123.9:2098 1…
Unknown	5424	20.0104	1459.74	[164.7]	164.7	25558.4	50267.1	383941	755117			-1	-1	-1	-1	51.3:915 53.2:13749 54.4:751 57.1:9280 59.3:18 60.7:599 61.8:787 65.1:1197 66.1:4993 67:1270 67.8:1144 69.2:2343 74.1:5038 76.1:3569 77.1:3671 78:8087 79.2:4890 80.1:7684 84.1:2597 84.1:4258 86.8:2494 87.4:731 90.9:4926 95.2:690 96.8:1347 97.6:309 101.1:1318 102.5:89 102.5:1597 103.5:2170 104.9:7001 107.4:2977 109.3:1746 110.3:1115 110.3:2050 111:4779 115.9:183 117.7:968 119.4:7195 120.1:703 122:…
Unknown	5459	20.0879	1463.35	[85.2]	85.2	8093.83	13617.2	270642	455330			-1	-1	-1	-1	50.2:5098 52.2:2018 53.1:5823 60.5:3844 60.5:2047 60.5:1287 61.8:229 63.2:554 65:758 67.3:0 69.1:7587 73:1 76.1:21384 77.1:4438 77.8:26905 79.1:5788 82.1:1872 85.2:8094 88.9:1 90.9:2034 92.1:4221 93.1:2080 94:3510 95:2673 96:1318 99.3:5987 102.4:3082 103.1:1 104:1 104.9:171 106.9:1613 109.5:1137 109.5:1914 114.7:18 115.6:1132 116.9:662 121.8:1178 122.7:1637 124.5:1 126.8:1560 128.89999:231 130.89…
Unknown	5462	20.0946	1463.65	[57.2]	57.3	38908.6	93234.8	381751	914772			-1	-1	-1	-1	50.1:11978 50.1:11978 51.3:4426 53.2:10627 54:5107 54:5021 55.1:6942 56.2:5938 57.3:38909 58.5:3904 61.2:734 62.1:2427 63.9:1039 64.9:1429 65.8:3159 66.3:3194 67:5196 68:3144 69.2:9520 70.1:7479 71.2:22534 80.1:8808 81:4414 84.1:4491 85.3:16761 86.6:1592 89.6:2593 90.6:1326 91.3:1876 93:2034 94.3:1789 96.9:3618 98.3:2372 99.1:3543 99.7:1120 106.9:1886 107.5:1165 109.8:1567 110.8:1549 112:599 113.…
Unknown	5477	20.1278	1465.2	[389.5]	389.5	2030.21	3560.53	310801	545075			-1	-1	-1	-1	50.2:1769 54.2:7006 55.1:2122 56.1:6589 58.3:1414 60.2:2975 61:681 61.9:4178 65.1:3586 65.1:611 66.1:1970 68.3:4441 69.8:5274 71.2:4645 73.8:8787 76.1:12545 77.2:3829 78.1:1068 80.2:2676 81:3322 83.3:477 84.2:364 85.3:1 87:473 88.8:851 91.1:432 94:3393 94.9:3410 98.3:1803 100:2942 101.1:1934 104.6:4482 105.1:3981 106:1287 109.7:1953 110.4:4514 111.5:1187 114.7:852 116.3:1535 118:2735 118.8:5202 1…
Unknown	5479	20.1322	1465.41	[176.9]	176.9	14437.6	34927.5	425346	1.029e+06			-1	-1	-1	-1	51.3:2669 54.1:132 58.1:875 59.1:1127 59.8:1061 62.3:4297 67:6363 67.9:2729 69.2:8922 69.2:8009 70.4:7065 71.1:4558 71.8:6366 73.1:5428 77.1:2421 78.1:12350 86.3:2087 87.8:54 89.5:27 91.2:3493 92.1:4754 93.1:3202 93.9:3432 96.2:1091 97.2:1706 98.6:4954 101.4:3362 102:1998 104.6:3763 105.3:4214 105.8:4758 105.8:3907 107.3:5034 108.8:3447 109.9:2982 113.1:0 113.8:942 115:1035 116.8:1717 118:792 118…
Unknown	5484	20.1433	1465.92	[326.4]	327.9	6.91209	1.22951	156361	27813.3			-1	-1	-1	-1	50.4:585 51.2:1258 56.1:364 56.9:0 58:270 59.1:957 59.7:662 64.9:698 66.2:4275 66.2:5611 67.1:322 68.3:1 71.1:1 71.9:3823 76.3:6869 80.1:1943 82.1:1563 83.2:1619 84.1:571 85:1749 86:97 87.9:69 90.1:238 91.4:114 92.2:1287 93.1:2752 93.1:8472 94.2:1479 95:1038 96:568 96:5599 97.3:1191 98:724 103.9:291 104.6:270 111.2:796 111.7:293 113.7:607 115.2:3012 117.5:559 119:83 123.8:1 124.9:430 127:716 127.…
Unknown	5487	20.1499	1466.23	[326.5]	326.5	33066.1	74550	389591	878364			-1	-1	-1	-1	50.3:902 53.2:12522 55.1:0 56.2:1773 58.1:4065 61.1:91 63.1:1046 64.4:1006 65:0 66.2:1189 66.9:9876 66.9:1548 75.1:4400 76.1:3391 77.1:6548 81:1092 82.9:1735 85.2:1 86.1:3955 87.2:1355 89.5:1241 91:3712 93:9566 94.3:586 95:0 97.6:0 99.9:1 101.1:0 102.6:3965 104.3:850 105.2:1695 106.5:2295 111.8:507 112.7:1142 114:2103 115.8:2793 116.8:2282 118.8:2143 120.1:4334 124.7:781 126.1:1431 128.7:1470 130…
Unknown	5490	20.1566	1466.54	[73.1]	73.1	74809.8	155623	652949	1.3583e+06			-1	-1	-1	-1	50.3:1 51.2:6734 52.2:14741 54.2:3116 56:1 57:0 59.1:4355 62.4:762 63:3025 67.1:5384 69.2:5136 71:1 71.9:4854 73.1:74810 74.2:10508 76.1:6402 79.1:17072 80.2:8606 82:2560 82.9:1 83.9:2469 84.8:1 86.1:2867 87:177 88.1:1776 89.1:0 92.2:3981 95.8:479 96.6:4014 100.9:0 102.9:1 103.5:5544 104.8:2333 106.4:2473 107.4:2564 111:1432 112.4:866 113.1:1643 113.9:1196 115.8:467 116.9:1628 117.5:2606 118.8:16…
Unknown	5493	20.1632	1466.85	[147.1]	147.1	44205.4	96337.8	418092	911158			-1	-1	-1	-1	51.3:2952 52.2:3308 53.2:13192 54.2:2471 60.7:1966 62:2327 63.2:2994 64.1:776 64.9:3760 68.1:2371 69.1:5101 70:1114 73.1:107 77:2109 78.1:18809 79.1:7206 82.1:2703 87.2:536 87.2:1 89.1:1 91.7:3932 94.5:4241 99.1:1164 100:177 100.7:247 101.3:925 103:3521 103.7:8126 104.3:3754 105.3:1471 107.6:907 108.4:135 109:1927 110.5:2484 112:1579 114.6:3017 116.9:2497 122.4:822 124:256 125.9:166 128.7:3184 13…
Unknown	5495	20.1676	1467.05	[398.4]	398.4	2580.56	1772.18	289400	198744			-1	-1	-1	-1	50.3:1807 52.2:5055 53.2:8264 54:1746 55:761 57.9:424 59:5459 61.7:4770 63.3:2639 64:347 66.8:2624 67.3:1180 68.1:1382 68.8:0 69.3:3774 76:12515 77:4149 78.2:22592 80.3:4459 82.9:30 82.9:231 84.7:789 86.9:2063 89:1026 90.5:2322 90.5:956 91.8:1062 95.1:2451 96.9:1813 99.9:1072 101:2830 101:3640 103.8:3301 105.8:0 108.1:663 109:1554 112.4:1762 113.1:245 114.8:518 120:639 122.9:331 124.7:1148 126.1:…
Unknown	5496	20.1699	1467.16	[216.5]	216.5	4398.4	8914.37	235289	476866			-1	-1	-1	-1	50.3:3980 53.1:14636 54:2529 55:3582 58.3:782 61.1:454 67:5728 68:193 75.1:8709 76.3:5135 78:6181 81.1:2215 81.1:3096 83.2:4333 83.2:3672 86.5:1671 87.1:2133 90.2:5422 93:57 94.8:3555 95.5:3354 100.9:2466 103:507 105.5:616 106.5:0 107.8:410 111.7:193 115.8:0 120:2444 123.7:160 124.9:47 127.8:2427 129:2822 144.7:1211 145.3:0 147.8:6815 150.2:1407 151.5:34 153.8:1949 155.89999:2847 155.89999:5322 1…
Unknown	5517	20.2164	1469.32	[116.6]	117	10279.4	11490	332260	371392			-1	-1	-1	-1	50.3:2670 53.2:9559 54.2:738 58.3:1280 58.9:3280 60:495 62.2:1400 64:1561 66.8:4428 68:620 69.1:845 73.1:4564 75.1:3824 77.2:11315 80.2:7384 81:1998 83.1:690 83.7:3290 86.9:2240 88.9:620 92.1:1773 93.1:3771 95.9:2635 98.2:4531 100:2083 100.9:1952 102.9:857 104.9:3393 108:955 108:4274 110.1:1742 110.9:2029 111.4:2565 112.9:2014 115.7:3581 115.7:1947 117:10279 118:356 118.9:4066 121.1:2451 124.9:14…
Unknown	5523	20.2296	1469.94	[219.7]	219.8	4608.92	8949.91	569935	1106739			-1	-1	-1	-1	53.2:3219 54.1:1816 56.2:3823 57.2:7140 58:3398 59.2:4404 59.9:2079 61:3741 63:415 66.9:3560 68.3:4094 69.1:4991 69.8:6136 71.1:854 73.1:221 74:4806 77.3:2009 77.3:18708 80.2:11172 80.9:3107 82.8:1007 83.5:637 84.6:4652 85.3:2206 86.9:1830 87.6:2681 88.8:21190 88.8:9158 90.9:1333 91.6:2567 94.7:4534 94.7:2241 95.9:4554 97.2:1146 98.1:132 99.9:4818 101.1:1 101.9:2277 104.7:7938 107.3:1284 109.6:18…
Unknown	5524	20.2319	1470.04	[132.7]	132.7	42512.9	82002.6	676666	1.30521e+06			-1	-1	-1	-1	55.2:0 56:712 61:4079 62.7:501 63.9:1 64.9:988 67.7:2432 69.9:6757 71.2:5294 75.1:3749 80.8:3134 81.8:2001 85:4583 86.1:5901 87.2:3712 89:14871 95.1:1402 96.6:506 99.5:10040 101.9:5739 103:6860 103:5080 104.2:2287 104.7:6531 106.2:2445 106.7:576 107.7:2233 113.2:1437 113.9:2889 116.6:9524 118.5:10833 119.8:139 121:0 122.1:1537 122.1:4162 123.5:367 125.5:3735 126.3:1694 126.3:1243 128.10001:3020 1…
Unknown	5525	20.2341	1470.14	[73.1]	73.1	68409.7	145161	803840	1.70569e+06			-1	-1	-1	-1	50.3:3472 51.3:5844 53.2:5464 54:1954 58.2:1 59:14052 60.2:2138 62.9:1369 66:5276 66.9:738 67.9:3466 70:1606 73.1:68410 75.2:6034 77:4529 79.1:2182 80.7:11613 84.8:3076 86.1:10747 89.1:19338 91:1142 92:3662 93.9:1730 93.9:1904 96:2304 98.4:2112 100:7749 102.1:5747 102.9:2892 105:3064 108.5:1 109.8:0 110.3:1988 111.1:0 114.8:4538 115.3:2816 115.8:6796 116.6:8311 118.8:17473 122.9:652 123.8:787 125…
Unknown	5528	20.2407	1470.45	[205.7]	205.7	10664.2	19360.7	540715	981662			-1	-1	-1	-1	55.1:476 57.1:7545 60.9:1810 61.5:590 63.3:1975 64.3:1793 66.2:2915 69.1:2919 71:6869 73.2:270 75.2:9657 76.1:10685 81.8:3801 82.6:3207 83.4:4606 85.5:6478 87:253 90.3:3625 93:2956 95.2:1 97.1:2983 98.9:4771 98.9:3704 101.9:4661 102.9:1345 104:1116 105.8:1448 106.9:674 109.1:768 112.3:332 113:2764 113.8:2603 114.5:2475 116:1589 117.7:6343 118.8:3508 118.8:3522 120.2:1026 123.5:1730 123.5:898 125.…
Unknown	5581	20.3581	1475.91	[179]	179	22220	47616.3	326715	700133			-1	-1	-1	-1	50.2:7957 52.2:12291 53.2:5960 54.8:152 57.1:5346 60.2:57 60.9:2144 61.6:691 62.8:456 67.3:2919 68:4136 70:2530 71:4179 73.1:469 75.1:18131 77.2:5803 81.7:1100 84.1:1315 85.1:3082 87.4:1207 89:1 90.3:3286 92:3117 94.3:575 94.9:1004 96.3:1838 97:28 98:846 98.9:340 99.6:3561 102.8:195 104.1:10557 105:1665 106.1:2596 106.9:855 107.7:425 108.9:573 110.1:1930 113:2868 113:1736 113:1854 114.6:1652 116.…
Unknown	5596	20.3913	1477.46	[210.1]	210.2	1606.49	1996.34	519126	645103			-1	-1	-1	-1	50.3:496 51.2:5417 52.2:1239 54.9:404 54.9:6311 56.4:4018 57.1:2621 59.2:1755 60.5:2836 61.4:343 61.4:2149 63.1:1087 64.1:2035 66:504 67.6:87 68.4:6865 69.2:1372 69.9:5052 70.4:2053 70.4:4073 73.1:14820 75.2:12800 77:2136 79.1:5616 80.3:5614 81.1:285 82.8:3216 84.1:550 85.9:4373 86.7:400 87.3:3816 89.2:2226 89.2:2059 90:1685 92.5:9959 94:913 95.1:1041 95.9:7702 95.9:7038 97:2174 97:3841 98:1957 9…
Unknown	5600	20.4002	1477.87	[326.5]	326.7	12922.6	31947.5	385829	953856			-1	-1	-1	-1	50.2:4950 55.2:0 56.1:982 59.1:8 60.8:388 63.8:2625 65.9:2901 67:1155 68.1:0 69.3:9321 73.1:1820 75.1:8508 76.2:10537 77.1:3924 77.9:24411 79.1:4120 80.2:13519 80.9:504 82.1:2847 86.1:1681 87.7:1318 89.1:4708 90.4:2871 91.1:3094 96.8:1103 99.4:0 100:2966 101.2:136 101.9:1256 102.9:800 103.7:1 104.6:5345 104.6:3461 106:3178 108.3:3180 109.8:1410 110.3:6355 110.9:4535 112.3:1259 114.3:176 115.7:703…
Unknown	5603	20.4068	1478.18	[328.7]	328.8	9672.08	17913.8	427574	791916			-1	-1	-1	-1	53.2:2528 54.2:4631 57.1:550 58:5526 60.3:3783 62.9:2327 65:4621 69.2:3932 73:8504 74.1:5400 81:2279 82:1398 84:3078 84:6014 84.9:1690 89:6159 90.8:1265 91.5:3023 93:2492 93.9:6271 95.1:6352 97.7:2828 100.9:3709 102.1:1684 108.3:513 114:1387 116:4454 118.1:3570 118.9:6440 119.9:3333 121:1780 122.3:1233 124.7:359 125.3:507 127.5:1968 129.39999:1565 130:549 131.89999:2864 132.39999:665 133:1419 134…
Unknown	5638	20.4843	1481.78	[132.8]	133.1	4381.41	7108.99	312756	507457			-1	-1	-1	-1	50.3:92 52.2:8101 53.2:1 56.1:1110 57.3:935 57.3:447 59.9:718 64.1:3989 64.1:3729 65.2:908 66:1800 67.8:7503 69.3:3898 69.3:10720 71.5:1382 72.9:2 74:9585 75.1:10837 76:25059 77.2:1628 79.1:7114 81:1784 82.1:2596 84:1290 86.1:1309 86.9:2427 88.8:206 91.9:547 95.3:2480 96.1:2558 97.8:0 102.9:2586 106.8:0 108.1:1372 110.8:0 112.2:28 112.8:1025 113.4:540 114.1:1569 114.1:395 117.6:3269 120:1180 121.…
Unknown	5642	20.4932	1482.19	[73]	73	78685.6	181128	482481	1.11063e+06			-1	-1	-1	-1	50.2:5279 51.2:6823 53.1:3119 55.2:3154 58.2:1469 58.9:8203 61:4134 62.3:900 62.9:343 63.5:2620 64.1:2193 67.4:829 73:78686 78:11123 79.1:697 80.3:8105 82.7:18 83.9:3511 92.7:1346 94.2:3628 94.9:1 95.4:7607 97.9:420 99.4:2887 100.2:2867 100.2:12702 101.2:1932 103.7:558 105.6:1857 112.1:376 115.1:1930 116:5142 116.9:5981 119.8:1831 120.4:2273 121.2:2500 122.4:1796 124.1:1515 125.2:2096 129.7:1607 …
Unknown	5644	20.4976	1482.4	[146.9]	146.9	27753	62269.8	373893	838908			-1	-1	-1	-1	52.2:5561 53.2:4870 56.3:160 57:0 57.8:0 60.2:2792 63:74 65.1:4470 66.2:1227 70.2:1592 73.1:3852 75.1:18279 77.1:3181 81.4:3909 85.1:0 86.3:1543 87.8:2079 91.1:7910 97:181 98.1:308 99:1 100.9:3625 101.9:2797 102.7:5465 105.7:3024 108:736 109:1329 110:1427 111.2:1078 113.5:470 113.5:2129 114.7:884 116.6:3522 118.8:4797 119.8:2230 122.9:1236 124.9:1357 126.2:962 128.39999:0 130.2:1711 131:4121 132.…
Unknown	5656	20.5242	1483.64	[71.3]	71.3	19899.2	38139.5	402377	771209			-1	-1	-1	-1	51.2:2672 53.3:3535 55.2:3063 56.1:961 57.2:5760 58.1:2214 61.3:2485 62.3:3897 63.2:1391 66.2:807 67.2:211 67.8:908 70.2:603 71.3:19899 71.3:19487 73.1:7938 74:7532 77.1:3629 79.1:4359 80.2:14425 89.2:0 90.9:1934 91.8:333 94.5:4623 97:990 99:5554 99.8:618 102.3:4849 105:2708 105.9:2929 116.8:4473 125.1:1596 125.6:1388 127:5275 127.8:2988 135.8:1312 137.39999:667 147.39999:15612 154.89999:40 158.7…
Unknown	5659	20.5308	1483.95	[85.3]	85.3	14356.2	27426.2	329925	630293			-1	-1	-1	-1	50.2:1096 54.1:3064 56.2:3025 57.2:10281 59.2:1 60.2:1996 60.2:2520 60.8:801 64:3294 64.8:383 65.8:494 67.2:1584 69.2:1222 73.1:2024 74:8856 75:539 76:15267 79.2:4915 81.1:1659 83.2:6387 83.2:5573 83.9:283 85.3:14356 85.3:19672 87.1:1720 87.7:1028 89.9:2823 90.8:1695 92.9:1646 95.2:1 96:3371 98.4:16 99.7:2456 100.7:1459 102.9:3740 107.4:2231 108.2:1152 108.7:2736 109.6:3924 113.2:1917 115.8:1513 …
Unknown	5671	20.5574	1485.18	[183.5]	183.5	4468.71	8097.24	328108	594527			-1	-1	-1	-1	50.2:5463 52.3:3420 54.2:3749 57.7:12942 59.3:5652 60.2:473 63.9:988 65:0 66.2:0 68.2:7693 73.1:65 77.1:952 78:17565 81.1:2487 81.7:709 84.2:2343 89.1:10409 89.8:1834 90.9:5897 95.1:3964 97.9:2241 99.5:309 101:1 104.7:326 105.3:2283 106:3186 110.9:1662 113.2:731 114.8:1718 115.7:3780 116.3:2505 117.2:0 119.3:626 122:1574 123.7:592 125.7:1491 127.1:41 128.7:1802 131.8:4859 132.5:5040 134.10001:367…
Unknown	5674	20.5641	1485.49	[131.1]	131.1	17485.3	30628.9	483912	847664			-1	-1	-1	-1	51.3:848 55.2:6427 57:3561 58.2:10915 61.3:3007 62.3:214 64.1:0 66.2:1785 67:1296 68.1:2763 71.2:1684 74:3391 76.2:15795 77:7036 78:4274 81.1:3572 82.9:1002 83.8:1994 85.2:5418 87.6:757 90.6:4994 94.9:856 96.8:628 98.1:3514 98.1:3588 99.1:1381 99.8:7759 101.8:4071 104.9:5767 104.9:461 107.9:706 108.8:925 110.7:6162 111.3:2093 112.1:850 112.8:1811 113.9:3767 114.9:6524 118:1152 121.7:511 123.1:284…
Unknown	5676	20.5685	1485.7	[73.1]	73.1	47433.7	86020.9	400869	726974			-1	-1	-1	-1	50.3:1 51.2:11396 52.3:5590 53.1:2488 54.1:3971 56.2:2584 59.2:1804 65.9:3126 65.9:1667 69.2:560 70:1635 73.1:47434 75.2:9606 77.1:6914 79.2:4083 80.2:6390 82.7:207 88.9:4962 88.9:24713 91.7:2547 93:1 93.8:0 97.1:1101 102.2:3990 102.8:0 104.2:430 104.7:3252 106.6:433 106.6:3031 109.9:1744 109.9:772 113.1:360 116.9:0 118.1:5020 119:5568 120.1:2562 130.89999:5425 132.10001:4291 132.8:3237 134.7:196…
Unknown	5679	20.5751	1486.01	[144.8]	144.7	6022.14	6287.52	370841	387183			-1	-1	-1	-1	53.3:3189 54.2:801 55.2:3196 58:4620 59.1:2599 61.1:916 62.2:2149 63:242 63.7:4416 64.6:3486 65.6:7177 67.1:110 68.1:1758 76.1:9158 78.1:11733 80.1:10912 81:2451 83.1:129 84:1 85.6:1 89.2:1297 90.1:2589 90.6:1679 96.8:6270 96.8:4782 98:1456 98:4789 98.9:727 99.7:5368 100.3:2786 100.3:2968 101.9:2604 103.8:218 106.2:1191 107:2281 108.3:2901 110.7:2559 111.2:2992 111.9:1 112.7:920 114.8:6484 117.9:…
Unknown	5692	20.6039	1487.34	[225.5]	225.9	5543.99	10064.4	188210	341673			-1	-1	-1	-1	50.3:218 52.2:1683 56.2:2851 57:8877 58.1:758 58.1:430 60:588 61.1:141 61.9:360 66:1279 69.2:4033 69.9:11506 70.9:8745 70.9:8554 75.1:7835 78.1:668 82.1:1596 83.7:4016 85:47 85.8:3384 87.5:797 90.4:5588 92.5:5455 93:5144 100.1:973 101.9:2164 106.1:284 110.2:1223 112.3:907 113.2:2886 116.7:2145 122.6:322 134:332 138.5:1818 140.7:1504 143.10001:1 149.39999:32 152.39999:109 166.89999:330 170.10001:2…
Unknown	5703	20.6283	1488.48	[113.3]	113	11642.1	21859.4	395275	742175			-1	-1	-1	-1	50.2:274 51.3:12142 52.2:8628 56.2:10752 57.2:5516 67.1:5872 68.2:6348 69.2:9395 71.1:9415 79.2:10534 80:13292 82.1:7898 84.1:2471 85.2:9619 87.8:1137 90.7:749 90.7:2465 91.9:850 92.9:2220 94.1:5195 95.7:1343 99.1:5316 100.1:2268 102.8:5957 104.8:5103 104.8:1499 107.7:1722 109.8:1154 112:2801 113:11642 113:20796 114.1:3359 116.8:2080 118.3:668 118.3:1781 119.1:5306 120.1:1663 123.3:2958 123.3:258…
Unknown	5707	20.6371	1488.89	[71.2,57.2]	71.2	89276.5	186453	734273	1.53352e+06			-1	-1	-1	-1	50.2:1427 52.2:10599 54.2:3339 55.2:17694 57.2:91322 58.2:2622 59.4:4555 60.4:609 63:3265 63.9:4072 65.1:1469 66:2092 69.2:12676 70.2:2636 71.2:89276 72.1:3738 73.2:23547 75.1:0 76.3:13014 77.1:3422 79.1:23780 81:7051 83.1:12782 83.9:9185 85.2:54341 86.1:3128 87.2:2150 89.8:3737 91:5666 92:2935 92.6:1604 96.8:4084 97.7:6437 99:15845 100.8:5072 101.8:1634 102.4:676 105.9:3177 106.9:558 110:931 111…
Unknown	5717	20.6593	1489.92	[222.9]	222.9	26029.2	63838.8	399708	980318			-1	-1	-1	-1	52.3:4138 59.1:1070 60.9:797 64:1724 64.7:658 67.2:3257 67.2:9757 72:582 73.1:16327 77.2:1577 79.1:18479 80:8920 86.7:4148 87.2:1205 87.2:2158 88.3:95 89:2370 89.7:9060 89.7:2214 90.9:7877 91.9:2250 91.9:89 93:995 94.2:3719 94.8:3289 95.9:2779 101.9:3805 103.1:393 103.9:4332 105:2039 105.7:1247 107.8:21 108.9:2256 110:295 113.7:662 116.7:469 117.9:2292 119.2:1693 123.8:1044 124.4:2485 125.1:3034 …
Unknown	5720	20.6659	1490.23	[207.9]	207.9	12230.1	17367.3	266222	378047			-1	-1	-1	-1	52.2:739 54.1:1231 55.2:2544 56.1:1019 58.8:7125 59.9:659 61:2382 63:1876 64:341 65:1427 66:794 67:2651 68.1:2691 70.5:9728 71.9:2426 75.1:236 76.1:17779 77.2:16010 81.9:2413 84.1:3558 85.1:2886 86.2:969 91.1:1085 92.7:988 92.7:5618 95.9:1484 98.2:3906 98.8:4247 98.8:7080 100:3994 100.9:740 101.8:1279 105.9:1820 106.7:2489 106.7:3878 107:3727 108:4175 114.8:1501 119:2261 122.5:680 123.6:1500 125.…
meso-Erythritol; GC-EI-TOF; MS; n TMS; RT	5752	20.7368	1493.52	[101.1]	101.1	24897.3	63115.2	1.38277e+06	3.50535e+06	OCC(O)C(O)CO	UNXHWFMMPAWVPI-UHFFFAOYNA-N	725.795	852.104	721.312	852.73	52.3:10219 54.1:1405 54.7:8615 55.3:3044 57.9:3530 59.1:7932 61.1:2025 62:1002 63.1:1680 64:953 65.1:2353 66:1173 69.1:8545 71.3:1 73.1:242248 75.2:34482 78.1:13708 79.1:8480 82.1:152 82.7:1924 83.9:0 86.9:366 87.8:2805 89.1:6275 93:4610 94.2:2632 94.8:1162 94.8:5522 95.2:5142 97.9:469 97.9:779 99:1 99.6:1297 101.1:24897 103:77285 105:5239 105.6:2110 112.1:2649 113.1:3198 114.7:6151 116.1:15218 1…
Unknown	5755	20.7434	1493.83	[103.1]	103.1	89039.4	172191	1.04892e+06	2.02847e+06			-1	-1	-1	-1	50.2:1697 51.2:0 52.2:18325 55:925 56.8:0 59.1:12449 62:2115 63:0 64.2:1201 64.7:4096 66:1168 67.3:3211 69.2:13834 73.1:5738 80.2:10284 81.1:2957 82.2:2893 85:1 86:1674 87.6:1232 91:4522 91:4685 93.5:5105 96:419 97:56 98.9:6256 103.1:89039 104.9:8340 105.7:1558 107.4:1374 108.7:790 109.9:2510 117:14033 118.7:12595 120.2:1 121.4:2953 122.1:1070 122.9:1114 124.1:1784 124.8:3006 126.7:1362 129.10001…
Unknown	5756	20.7456	1493.94	[73]	73	292103	572484	1.10168e+06	2.15915e+06			-1	-1	-1	-1	52.2:14046 53.3:13675 54:6525 56.2:0 58.1:3452 59.1:9492 60.2:440 60.9:4029 61.9:3423 62.9:1652 64.2:313 64.9:2085 66:4438 67:8332 67.6:11875 69.2:14994 70.1:4669 71.1:0 71.7:9490 73:292103 74:17784 75.1:40644 79.1:14557 80.2:2886 82.1:2444 82.8:1425 83.8:2083 85.1:0 88.9:13273 90.8:7507 93.8:1956 99.3:3246 101:9378 103.1:4552 104.9:7040 106.6:156 110.9:1076 113.8:0 117:57396 119.7:1604 120.9:603…
Unknown	5771	20.7788	1495.48	[128.3]	128.6	475.772	661.289	284182	394994			-1	-1	-1	-1	51.3:5426 54:4961 55:785 56.2:4515 57.3:4761 58.2:1889 58.9:5974 60.2:563 63.1:2082 65.1:232 65.7:1167 69.1:3082 71.2:1723 76:12962 79.1:2340 80.3:296 81.1:2106 83.9:1621 85.3:8371 87:1214 91.1:1157 92.3:1140 94.9:2163 98:1808 99.6:4362 100.1:3274 100.8:3970 101.7:4012 106:1412 106.8:3159 110.1:2590 110.9:243 113.7:2429 114.4:891 119.4:5637 121.1:160 125.1:363 125.8:362 126.9:467 127.9:6909 128.6…
Unknown	5774	20.7855	1495.79	[173.5]	173.5	35665.3	65996.6	388086	718131			-1	-1	-1	-1	50.2:472 52.2:2064 53:7931 55.1:2209 55.9:726 57.3:13645 62.7:4624 65.2:961 65.2:4792 67:6388 68.3:1500 70.1:6149 71.2:9424 77.1:1487 79.1:8481 81:2591 82:2468 83:5310 84.1:2039 85.1:641 86:8493 89:4012 89.8:1139 91:6539 91.5:471 93:2300 93.6:3181 95.1:558 95.7:1028 96.6:987 97.1:3564 98.9:3596 99.5:5628 100.3:7983 102:414 104.9:1720 106.7:237 108.8:3411 110.8:1009 112.1:4642 112.9:4055 113.6:173…
Unknown	5803	20.8497	1498.78	[66.1]	66.1	10986.7	8899.91	188631	152802			-1	-1	-1	-1	54.2:21394 60.2:1407 63.9:2094 66.1:10987 72.3:27829 74:2188 80.2:4595 94.3:4356 108.2:246 109.9:6953 117.9:420 129.2:3868 129.2:1 143.60001:337 147.7:358 166.5:2496 168.8:10177 171.10001:354 173.8:5398 178.7:695 184.3:2125 186.39999:464 195.7:45 198.39999:262 199.3:1332 200.2:149 201.2:54 205.39999:0 209.39999:711 221.60001:776 226.39999:867 228.3:743 229.39999:395 232.2:268 233.3:47 241.3:685 2…
Unknown	5806	20.8563	1499.09	[96.1]	96.1	79973.7	59950.8	371130	278210			-1	-1	-1	-1	50.3:2528 58.2:36597 80.2:15104 82.1:32813 93.7:4069 96.1:79974 103.9:3642 106.1:985 120:1 122.4:1850 124.3:1542 128.3:24753 135.8:2980 137.5:598 150.8:2391 152.2:730 154.3:941 162.3:957 163.89999:613 164.89999:2 170.2:4735 171.8:241 173.8:21172 175.7:1214 178.39999:5934 179.10001:2183 182.39999:2042 186:1619 188.10001:2177 199.39999:1084 200.3:111 205.8:4612 206.60001:972 206.60001:5212 208:51 2…
Unknown	5811	20.8674	1499.6	[82.2]	82.2	163649	118217	577261	417005			-1	-1	-1	-1	57.2:1 58.3:74633 64.2:3155 68.2:32429 80.2:13862 82.2:163649 88.1:2594 89.1:14547 95.1:76198 99.2:8091 114.3:8867 120:1010 121.8:324 131:1400 135.8:2477 137.60001:1143 138.2:1162 140.10001:8681 144.39999:3846 164.7:3480 166.3:310 173.60001:12474 175:3964 178.60001:3312 183.39999:7094 187.7:1993 187.7:2072 193.7:314 195.60001:5 196.3:421 197.8:511 198.5:355 199:1750 199.60001:756 206.2:3888 210.2…
pentadecane	5814	20.8741	1499.91	[57.2]	57.2	22324842	46241928	75762088	156927648	CCCCCCCCCCCCCCC	YCOZIPAWZNQLMR-UHFFFAOYSA-N	896.559	565.807	600	802.871	50.2:56547 51.2:107608 52.3:71189 53.2:442134 55.2:4420104 57.2:22324842 58.3:911173 59.3:13226 60.2:968 61.2:11119 62.1:10142 63.1:16294 65.3:103465 67.2:704231 69.2:2540840 71.2:15950947 75.1:51045 76:16789 77.1:111275 79.1:239583 81.2:282567 83.2:1932581 85.2:10390675 89:4804 91.1:80727 92.2:17585 93.1:34567 95.1:66694 97.1:1365386 98.2:1574214 99.2:3063744 101.9:16031 104.3:9235 105:15302 105…
Unknown	5819	20.8851	1500.45	[82.2]	82.2	86247.6	55458.8	988682	635741			-1	-1	-1	-1	52.3:3909 55.2:33133 59.3:42488 61.2:243 61.8:7179 63:659 65.3:4767 67.2:13021 69.2:29368 71.2:102976 75.2:1840 77.1:15304 78.1:17107 81.2:10557 82.2:86248 83.1:35406 85.2:39170 87.3:7482 91.1:10654 92.1:240 93:1693 94:5805 95.1:14447 97.1:34364 98.2:4381 105:887 105.9:3388 106.7:3314 108:3823 109.1:8453 111.2:19001 112.2:10585 113.2:15246 115.9:7840 118.4:8039 120.2:1326 120.7:7492 124.2:7330 12…
Unknown	5823	20.894	1500.89	[217.6]	217.6	29373.5	26553.2	875147	791120			-1	-1	-1	-1	50.4:11186 52.2:130 53.2:31829 55.2:23262 57.2:14 60.1:3524 62.3:1591 63.9:5697 65.2:5174 67.2:13303 82.2:11085 87.8:2064 89.1:14260 91:7601 92:3631 93:4190 93.9:9460 100.5:38569 101.2:11139 102.2:23921 106.8:548 108.9:4518 111.1:13184 114.6:20393 117:6894 120.8:930 123:7796 124.2:8937 127.3:16474 128.89999:27054 130.3:32645 138.2:2521 141.3:2382 143:14924 144.8:44 150.89999:4414 158.10001:4384 1…
L-Threitol, 4TMS derivative	5825	20.8984	1501.11	[75.1]	75.1	312269	817791	16862460	44160492			-1	-1	-1	-1	50.2:30375 51.2:50731 52.2:34481 53.2:118112 55.2:910098 57.2:4405863 58.3:157918 59.1:37959 60.1:6156 60.9:18021 62.4:7802 63.1:8364 65:38317 65:39079 67.2:166595 68.3:111463 69.2:523538 71.2:3021415 75.1:312269 77.2:48205 79.2:91481 81.1:81527 83.1:387744 85.2:1879663 87.2:9054 89.8:10635 91:37094 93.1:20542 95.2:32710 97.1:351718 98.2:300887 99.2:578917 100.4:29595 103.1:70897 104.1:8953 105:2…
Unknown	5827	20.9028	1501.32	[189]	189	117622	267282	1.08981e+06	2476468			-1	-1	-1	-1	62.2:1083 64:1149 73.1:22137 75.1:1 80.3:26264 89.1:22785 90.1:5636 94.2:2071 96.2:10498 101:3575 103.1:6386 105:1147 106.5:8494 110.1:21613 117:73117 122.9:5849 128.89999:32221 130.3:15129 130.89999:30984 132.89999:2777 143:38491 149.60001:5626 153.5:5441 157.3:6745 158.2:3907 158.8:3705 161.10001:12434 163.39999:330 167.60001:4254 172.10001:5127 175.60001:2885 176.39999:3156 177.10001:2620 177.…
Threitol	5830	20.9095	1501.65	[146.8]	146.8	413174	909030	3.44712e+06	7584062	OCC(O)C(O)CO	UNXHWFMMPAWVPI-UHFFFAOYSA-N	724.379	779.84	620	755.525	54.3:28271 60.3:1099 63.7:5556 66.1:22586 73.1:877082 74.1:35805 76.1:34486 86.3:7672 87:3257 89.1:24371 96.2:22016 96.2:28199 101.1:81129 103:190042 109.8:7264 114.9:12891 116:61209 117.1:128823 118.2:16434 125.1:9224 129:74312 130.89999:34721 132.8:50708 136:3327 139.39999:6626 144.60001:7752 146.8:413174 148.5:32198 148.5:54772 153.7:11172 160.5:8323 162.7:2854 163.3:7193 163.89999:387 164.5:7…
Unknown	5834	20.9183	1502.09	[56.3]	56.3	71894.7	55017.7	693047	530357			-1	-1	-1	-1	50.3:8997 51.2:7593 52.2:14438 53.2:4598 55.2:0 56.3:71895 57.2:0 58.2:0 58.2:1276 59.2:1331 59.9:4929 60.5:1075 61.9:4597 63.1:2705 65:4495 66.1:2446 67.1:1 67.8:18429 69.2:1 71.1:1 77:10238 77.7:16638 78.2:22695 79.1:27168 81.1:12510 82:1 83.3:1 84.1:13719 85.1:1 86.5:4990 87.2:535 88.9:8076 91.1:9093 92.1:5261 93:3829 94.9:2743 97.2:1 97.2:1 98:1 99.1:0 99.1:0 104.2:7368 105.9:2552 107.2:1787 …
Unknown	5839	20.9294	1502.64	[217.7]	218	3171.5	3602.38	248112	281821			-1	-1	-1	-1	54.1:5810 56.1:22044 64.2:988 66.1:5606 73.1:21724 78.2:891 84.3:5874 89:6036 90.5:6910 117:6757 120.1:1583 121.6:88 125:1013 130.39999:8314 131:2180 139.7:5706 139.7:2096 151.2:290 165.7:617 166.3:21 176.10001:1010 178.2:1847 184.7:1444 190.89999:2195 192.2:1420 194.7:716 196.10001:716 197.89999:433 199.7:41 201.8:550 203.60001:1590 216.60001:22185 218:3172 223.8:137 225.39999:163 235.8:1937 239…
Unknown	5849	20.9516	1503.73	[58.2]	58.2	25812.9	49678.9	466878	898543			-1	-1	-1	-1	50.2:5398 53.8:1 56.3:22415 58.2:25813 61.1:3767 63:4295 64.1:3665 70.4:9706 77.2:16690 84.5:17464 86:9122 89.9:5753 94.5:8584 94.5:4086 103.8:1194 106.1:527 107.9:285 110:2111 119.7:9906 120.4:9273 122:2551 122.7:3985 123.9:2360 129.8:8685 134.89999:9375 136.3:1920 137.89999:1060 138.7:717 140:2786 142.7:2770 144.10001:844 150.7:3769 151.89999:2734 156:3081 159.7:4410 159.7:3907 164.7:0 165.6000…
Unknown	5853	20.9604	1504.17	[411.1]	411.1	10276.6	16792.5	492361	804544			-1	-1	-1	-1	50.2:5418 51.2:19369 55.2:711 61:2623 62.1:550 63.2:5893 67.2:4472 67.9:1696 72:5133 73:1 77.1:9318 79.1:8254 82.2:6193 84:9381 87:1060 87.8:3463 89:0 91:5230 93:224 93.8:5479 95.9:4671 99.2:2406 101.9:10839 102.8:518 103.5:2390 104:1180 104.7:4798 105.8:3580 107.7:2058 107.7:6094 111.8:4916 114.1:120 114.7:868 115.7:2768 116.5:1 117.1:1 117.9:474 124.8:604 126.4:1488 128:6960 131:1 131:2716 132:…
Unknown	5857	20.9693	1504.6	[348.6]	348.8	7949.1	14068.4	432554	765540			-1	-1	-1	-1	51.4:15558 52.3:2983 53.2:2381 55.2:0 56.3:1 57.2:1 58.4:14897 66:2343 67:1483 68.1:883 70.3:7483 71:0 73.1:0 75.1:1 76.1:8355 77.1:3573 80.1:16006 80.1:12240 80.5:7177 82:0 85.2:812 86.2:3655 87.4:984 91.9:869 93:2648 94.1:2477 95:2297 97.1:796 98:2072 99.4:0 99.9:930 100.7:10 101.3:3251 103.1:3217 105:2315 105.9:3370 107:970 108:2915 109:2775 111.7:2750 112.2:3860 113:0 115.7:5852 115.7:6022 11…
Unknown	5863	20.9825	1505.26	[204.9]	204.9	62134.8	140604	560951	1.26937e+06			-1	-1	-1	-1	50.3:1919 53.3:17594 54.2:1 60.1:1189 62.1:1316 64.3:2604 65:5994 66.2:4768 68.3:2805 77.1:8756 80.3:998 80.9:10356 81.6:4366 83.8:4992 90.1:1770 90.9:5445 94.2:547 94.9:3032 99.8:7955 101.9:8307 104:4735 105.1:5934 106.6:2291 107.2:3778 110.2:3166 110.2:4456 111.4:2286 118.5:7190 119.9:5865 120.6:10231 122.4:1495 123.1:115 124.2:435 124.9:877 127.7:9567 128.89999:11819 129.8:1 130.8:3384 131.8:9…
Unknown	5866	20.9892	1505.59	[177.1]	177.1	18242	26452.9	387805	562360			-1	-1	-1	-1	54.6:4811 58.2:1 61.2:1751 62.4:2642 64.1:3307 66.9:10982 77.1:1 79.1:2620 85.8:4435 87.1:2713 87.8:2925 91:3672 93.6:3699 99.8:3573 102.1:6545 106.1:2947 108.1:3389 115.1:20131 115.1:14609 117.7:5409 119.8:4208 120.5:878 122:552 123.2:1242 124:1608 125.6:349 126.5:5353 128.10001:17222 131.5:8383 134.7:6773 135.8:725 136.89999:2206 138.60001:850 140.8:3812 151:2697 153.3:17 156:1595 158.8:2630 15…
Unknown	5868	20.9936	1505.81	[104.7]	104.7	16008.2	36031.5	407727	917719			-1	-1	-1	-1	50.2:1335 51.2:12127 56.2:0 58.9:6883 67.2:7263 68:2031 70.1:5899 76.1:18505 77.1:1 77.8:31931 79.1:2954 86.5:0 87.2:2417 88.5:4902 88.5:337 91.2:13317 91.2:14884 91.9:3545 93:1950 94.1:1 96.9:861 96.9:1274 98:388 100.7:4383 104.7:16008 104.7:4334 106.1:2436 107.9:648 108.5:525 111:1473 112:383 115:19493 115.6:11972 116.6:1677 126.4:3150 132.8:3460 138.7:416 139.3:1 141.10001:502 141.7:6390 144.8…
Unknown	5875	21.0091	1506.57	[296.7]	296.8	3568.27	4502.75	404388	510290			-1	-1	-1	-1	54.1:11211 55.2:1342 59.1:3889 60.9:3222 61.8:3095 63.8:5102 65.1:191 67.2:3854 69.2:4713 69.9:10518 71.2:2990 73.9:2543 75.1:4315 76:786 78:4761 79.2:8777 81.1:10909 84.3:5667 84.3:8308 89:8697 93.1:448 93.8:635 97.7:0 98.3:1290 98.8:4440 98.8:3396 103:126 104.4:10187 107.9:577 108.8:1748 109.9:1833 111.1:372 114.4:7184 115:0 116.9:4629 119:1312 121.4:2105 122:619 122:2471 124:287 124.7:1451 124…
[truncated: 682 more rows]

## Sheet: DCMMeOH extract
Table S10: Raw spectral data of E. foeminea dichloromethane/methanol crude extract analyzed using GC–MS
Name	Scan	RT(min)	Retention index	Model Masses	Model ion mz	Model ion height	Model ion area	Integrated height	Integrated area	SMILES	InChIKey	Dot product	Reverse dot product	Fragment presence %	Total score	Spectrum
[truncated: 1,686 more rows]

## Sheet: EtOH extract
Table S11: Raw spectral data of E. foeminea ethanol crude extract analyzed using GC–MS
[truncated: 1,477 more rows]

[truncated: 2 more sheets: EA extract, MeOH extract]
