# Supplementary material for: Untargeted Metabolomic Profiling and Antioxidant Capacities of Different Solvent Crude Extracts of Ephedra foeminea
Source: Metabolites. 2022 May 17;12(5):451. doi: 10.3390/metabo12050451 (PMC9146585; doi:10.3390/metabo12050451)
Supplement: Supplementary file 1 [file metabolites-12-00451-s001.zip › Raw_data_NEG_LCMS.xlsx]

## Sheet: Ace extract
Table S19: Raw spectral data of E. foeminea acetone crude extract analyzed using ESI–LC–MS
Name	Formula	Annot. Source: Predicted Compositions	Annot. Source: mzCloud Search	Annot. Source: ChemSpider Search	Annot. Source: MassList Search	Annot. DeltaMass [ppm]	Calc. MW	RT [min]	Area (Max.)	# ChemSpider Results	# mzCloud Results	Mass List Match: Arita Lab 6549 Flavonoid Structure Database	Mass List Match: EFS HRAM Compound Database	Mass List Match: Endogenous Metabolites database 4400 compounds	Mass List Match: Extractables and Leachables HRAM Compound Database	Mass List Match: GC Orbitrap Contaminants Library Compound Database	Mass List Match: GC Orbitrap Flavor and Fragrances Compound Database	Mass List Match: GC Orbitrap Metabolomics Library Compound Database	Mass List Match: Natural Products Atlas 2020_06	MS2	Area: EF_ACE_M_02.raw (F1)
D-Iditol	C6 H14 O6	Full match	No results	Full match	Full match	-0.58	182.079	0.596	6.9193e+06	14	0	No matches found	No matches found	Multiple matches found	No matches found	No matches found	No matches found	No matches found	No matches found	No MS2	6.9193e+06
	C2 H N3 O5 P2	Full match	No results	No results	No results	-3.2	208.938	0.661	3.14842e+06	0	0	No matches found	No matches found	No matches found	No matches found	No matches found	No matches found	No matches found	No matches found	No MS2	3.14842e+06
	C3 H4 N2 O8 P2 S3	Full match	No results	No results	No results	2.9	353.862	0.664	1.87752e+06	0	0	No matches found	No matches found	No matches found	No matches found	No matches found	No matches found	No matches found	No matches found	No MS2	1.87752e+06
	C3 H N3 O6 P2	Full match	No results	No results	No results	-2.67	236.933	0.669	4.3671e+06	0	0	No matches found	No matches found	No matches found	No matches found	No matches found	No matches found	No matches found	No matches found	No MS2	4.3671e+06
Sch 725674	C18 H32 O5	Full match	No results	Not the top hit	Full match	1.35	328.225	7.086	1.57837e+07	122	0	No matches found	No matches found	No matches found	No matches found	No matches found	No matches found	No matches found	Multiple matches found	No MS2	1.57837e+07
[FAtrihydroxy(18:0)]9_10_13-trihydroxy-11-octadecenoicacid	C18 H34 O5	Full match	No results	Partial match	Full match	1.26	330.241	7.418	3.98245e+07	13	0	No matches found	No matches found	Multiple matches found	No matches found	No matches found	No matches found	No matches found	Multiple matches found	No MS2	3.98245e+07
Neorustmicin B	C21 H34 O7	Full match	No results	Not the top hit	Full match	-3.68	398.229	7.418	6.62609e+06	6	0	No matches found	No matches found	No matches found	No matches found	No matches found	No matches found	No matches found	Single match found	No MS2	6.62609e+06
Hexadecanedioicacid;Thapsicacid	C16 H30 O4	Full match	No results	Partial match	Full match	0.93	286.215	7.543	5.12514e+07	56	0	No matches found	No matches found	Single match found	Multiple matches found	No matches found	No matches found	No matches found	Multiple matches found	No MS2	5.12514e+07
Hydroleptosphol	C19 H30 O6	Full match	No results	Partial match	Full match	-4.83	354.203	7.543	7.71965e+06	13	0	No matches found	No matches found	No matches found	No matches found	No matches found	No matches found	No matches found	Multiple matches found	No MS2	7.71965e+06
Koninginin G	C16 H30 O5	Full match	No results	Not the top hit	Full match	1.34	302.21	7.632	4.8537e+06	10	0	No matches found	No matches found	No matches found	No matches found	No matches found	No matches found	No matches found	Multiple matches found	No MS2	4.8537e+06
10_16-Dihydroxyhexadecanoicacid	C16 H32 O4	Full match	No results	Partial match	Full match	0.94	288.23	7.684	2.185e+07	37	0	No matches found	No matches found	Single match found	Single match found	No matches found	No matches found	No matches found	No matches found	No MS2	2.185e+07
Hexyl fumarate	C16 H28 O4	Full match	No results	Full match	Full match	1.02	284.199	7.732	4.53343e+06	80	0	No matches found	No matches found	No matches found	Single match found	No matches found	No matches found	No matches found	Multiple matches found	No MS2	4.53343e+06
Vitexin 2"-O-p-coumarate	C30 H26 O12	No match	No results	No match	Full match	3.98	578.145	7.798	5.39795e+07	3	0	Multiple matches found	No matches found	Single match found	No matches found	No matches found	No matches found	No matches found	Single match found	No MS2	5.39795e+07
	C36 H27 N2 O6 P S	Full match	No results	No match	No results	0.22	646.133	7.798	8.17997e+06	9	0	No matches found	No matches found	No matches found	No matches found	No matches found	No matches found	No matches found	No matches found	No MS2	8.17997e+06
Vitexin 2"-O-p-coumarate	C30 H26 O12	No match	No results	No match	Full match	3.98	578.145	7.887	1.68002e+07	3	0	Multiple matches found	No matches found	Single match found	No matches found	No matches found	No matches found	No matches found	Single match found	No MS2	1.68002e+07
Hexadecanedioicacid;Thapsicacid	C16 H30 O4	Full match	No results	Partial match	Full match	0.93	286.215	7.92	7.40961e+06	56	0	No matches found	No matches found	Single match found	Multiple matches found	No matches found	No matches found	No matches found	Multiple matches found	No MS2	7.40961e+06
Hydroxymethyldecylparaben	C18 H28 O4	Full match	No results	Partial match	Full match	1.44	308.199	8.196	6.43582e+06	103	0	No matches found	No matches found	No matches found	No matches found	No matches found	No matches found	No matches found	Multiple matches found	No MS2	6.43582e+06
Phthalic Acid, Bis-N-Pentyl Ester	C18 H26 O4	Not the top hit	No results	Partial match	Full match	1.43	306.184	8.64	5.67406e+06	141	0	No matches found	Single match found	Single match found	Single match found	No matches found	No matches found	No matches found	Multiple matches found	No MS2	5.67406e+06
exo-1,7,7-Trimethylbicyclo(2.2.1)hept-2-yl acrylate	C13 H20 O2	Full match	No results	Partial match	Full match	0	208.146	8.754	7.19408e+06	86	0	No matches found	No matches found	No matches found	Single match found	No matches found	No matches found	No matches found	Multiple matches found	No MS2	7.19408e+06
8-Hydroxyluteolin 4'-methyl ether 7- (6"'-acetylallosyl) (1->2) (6"-acetylglucoside)	C32 H36 O19	No match	No results	Not the top hit	Full match	-3.04	724.183	9.171	1.9268e+08	3	0	Multiple matches found	No matches found	No matches found	No matches found	No matches found	No matches found	No matches found	No matches found	No MS2	1.9268e+08
	C42 H31 F6 O7 P	Full match	No results	No results	No results	0.07	792.171	9.176	2.30711e+07	0	0	No matches found	No matches found	No matches found	No matches found	No matches found	No matches found	No matches found	No matches found	No MS2	2.30711e+07
6-Hydroxyluteolin 6-glucoside-7- [ 6"'- (3-hydroxy-3-methylglutaryl) glucoside ]	C33 H38 O21	No match	No results	No match	Full match	-1.97	770.189	9.176	1.07938e+07	2	0	Multiple matches found	No matches found	No matches found	No matches found	No matches found	No matches found	No matches found	No matches found	No MS2	1.07938e+07
	C29 H29 Cl N10 O13	Full match	No results	No match	No results	-0.07	760.16	9.178	1.43491e+07	1	0	No matches found	No matches found	No matches found	No matches found	No matches found	No matches found	No matches found	No matches found	No MS2	1.43491e+07
L-Tyrosinemethylester	C10 H13 N O3	Full match	No results	Partial match	Full match	-0.35	195.089	9.43	1.12537e+07	149	0	No matches found	No matches found	Single match found	No matches found	No matches found	No matches found	No matches found	Multiple matches found	No MS2	1.12537e+07
20-beta-Dihydroprednisolone	C21 H30 O5	Not the top hit	No results	Partial match	Full match	-4.61	362.208	9.998	5.061e+06	118	0	No matches found	Single match found	Multiple matches found	No matches found	No matches found	No matches found	No matches found	Multiple matches found	No MS2	5.061e+06
(9Z)-(13S)-12_13-Epoxyoctadeca-9_11-dienoicacid	C18 H30 O3	Not the top hit	No results	Partial match	Full match	1.04	294.22	10	2.6108e+07	74	0	No matches found	No matches found	Multiple matches found	No matches found	No matches found	No matches found	No matches found	Multiple matches found	No MS2	2.6108e+07
(9S_10S)-9_10-Dihydroxyoctadecanoate	C18 H36 O4	Not the top hit	No results	Partial match	Full match	1.47	316.262	10.016	5.43865e+06	36	0	No matches found	No matches found	Single match found	No matches found	No matches found	No matches found	No matches found	No matches found	No MS2	5.43865e+06
(9Z)-(13S)-12_13-Epoxyoctadeca-9_11-dienoicacid	C18 H30 O3	Full match	No results	Partial match	Full match	1.04	294.22	10.078	4.55709e+07	74	0	No matches found	No matches found	Multiple matches found	No matches found	No matches found	No matches found	No matches found	Multiple matches found	No MS2	4.55709e+07
[FA(18:3)]13S-hydroperoxy-9Z_11E_14Z-octadecatrienoicacid	C18 H30 O4	Not the top hit	No results	Partial match	Full match	1.25	310.215	10.266	2.90014e+07	67	0	No matches found	No matches found	Multiple matches found	No matches found	No matches found	No matches found	No matches found	Multiple matches found	No MS2	2.90014e+07
6-beta-Hydrocortisol	C21 H30 O6	Full match	No results	Partial match	Full match	-4.12	378.203	10.267	1.86157e+07	58	0	No matches found	Single match found	No matches found	No matches found	No matches found	No matches found	No matches found	Multiple matches found	No MS2	1.86157e+07
	C14 H25 F3 O10	Full match	No results	No match	No results	1.75	410.141	10.271	7.64018e+06	206	0	No matches found	No matches found	No matches found	No matches found	No matches found	No matches found	No matches found	No matches found	No MS2	7.64018e+06
(9Z_15Z)-(13S)-12_13-Epoxyoctadeca-9_11_15-trienoicacid	C18 H28 O3	Not the top hit	No results	Partial match	Full match	1.03	292.204	10.274	1.22802e+08	58	0	No matches found	No matches found	Multiple matches found	Single match found	No matches found	No matches found	No matches found	Multiple matches found	No MS2	1.22802e+08
20-beta-Dihydrocortisol	C21 H32 O5	Full match	No results	Partial match	Full match	-4.48	364.223	10.575	2.23882e+07	70	0	No matches found	Single match found	Multiple matches found	No matches found	No matches found	No matches found	No matches found	Multiple matches found	No MS2	2.23882e+07
Caffeic acid, 3TMS	C18 H32 O4 Si3	No match	No results	No match	Full match	1.47	396.161	10.578	1.07787e+07	277	0	No matches found	No matches found	No matches found	No matches found	No matches found	No matches found	Single match found	No matches found	No MS2	1.07787e+07
[FA(18:0)]12R_13S-epoxy-9Z-octadecenoicacid	C18 H32 O3	Full match	No results	Partial match	Full match	1.05	296.235	10.58	1.85307e+08	67	0	No matches found	No matches found	Multiple matches found	No matches found	No matches found	No matches found	No matches found	Multiple matches found	No MS2	1.85307e+08
(5R,5aS,9R,9aR,9bR)-9,9b-dihydroxy-6,6,9a-trimethyl-1-oxo-1,3,5,5a,6,7,8,9,9a,9b-decahydronaphtho[1,2-c]furan-5-yl hexanoate	C21 H32 O6	Not the top hit	No results	No match	Full match	-4.08	380.218	10.797	2.77071e+07	3	0	No matches found	No matches found	No matches found	No matches found	No matches found	No matches found	No matches found	Multiple matches found	No MS2	2.77071e+07
(9Z)-(13S)-12_13-Epoxyoctadeca-9_11-dienoicacid	C18 H30 O3	Full match	No results	Partial match	Full match	1.04	294.22	10.81	2.51872e+08	74	0	No matches found	No matches found	Multiple matches found	No matches found	No matches found	No matches found	No matches found	Multiple matches found	No MS2	2.51872e+08
	C35 H63 F O9	Full match	No results	No match	No results	-0.54	646.445	10.812	9.88746e+06	3	0	No matches found	No matches found	No matches found	No matches found	No matches found	No matches found	No matches found	No matches found	No MS2	9.88746e+06
(7S_8S)-DiHODE	C18 H32 O4	Full match	No results	Partial match	Full match	1.26	312.23	10.813	6.80478e+07	97	0	No matches found	No matches found	Multiple matches found	No matches found	No matches found	No matches found	No matches found	Multiple matches found	No MS2	6.80478e+07
	C17 H26 F2 O9	Full match	No results	No match	No results	4.6	412.156	10.813	1.75086e+07	252	0	No matches found	No matches found	No matches found	No matches found	No matches found	No matches found	No matches found	No matches found	No MS2	1.75086e+07
2-Oxooctadecanoicacid	C18 H34 O3	Full match	No results	Partial match	Full match	0.96	298.251	11.148	1.16673e+07	59	0	No matches found	No matches found	Single match found	Single match found	No matches found	No matches found	No matches found	Multiple matches found	No MS2	1.16673e+07
[FA(18:0)]12R_13S-epoxy-9Z-octadecenoicacid	C18 H32 O3	Full match	No results	Partial match	Full match	1.05	296.235	11.356	1.43132e+07	67	0	No matches found	No matches found	Multiple matches found	No matches found	No matches found	No matches found	No matches found	Multiple matches found	No MS2	1.43132e+07
[FAhydroxy(18:0)]12_13-dihydroxy-9Z-octadecenoicacid	C18 H34 O4	Full match	No results	Partial match	Full match	1.36	314.246	11.358	1.19861e+07	49	0	No matches found	No matches found	Multiple matches found	Single match found	No matches found	No matches found	No matches found	Single match found	No MS2	1.19861e+07
[FA(18:0)]12R_13S-epoxy-9Z-octadecenoicacid	C18 H32 O3	Full match	No results	Partial match	Full match	1.05	296.235	11.432	2.75105e+07	67	0	No matches found	No matches found	Multiple matches found	No matches found	No matches found	No matches found	No matches found	Multiple matches found	No MS2	2.75105e+07
[FAhydroxy(18:0)]12_13-dihydroxy-9Z-octadecenoicacid	C18 H34 O4	Full match	No results	Partial match	Full match	1.36	314.246	11.435	2.75863e+06	49	0	No matches found	No matches found	Multiple matches found	Single match found	No matches found	No matches found	No matches found	Single match found	No MS2	2.75863e+06
Pregna-4_9(11)-diene-3_20-dione	C21 H28 O2	Full match	No results	Partial match	Full match	1.1	312.209	11.457	5.36558e+07	124	0	No matches found	No matches found	Single match found	No matches found	No matches found	No matches found	No matches found	Single match found	No MS2	5.36558e+07
	C14 H25 F3 O8	Full match	No results	No match	No results	1.07	378.151	12.412	9.60623e+06	208	0	No matches found	No matches found	No matches found	No matches found	No matches found	No matches found	No matches found	No matches found	No MS2	9.60623e+06
[FA(18:2)]9Z_11E-octadecadienoicacid	C18 H32 O2	Full match	No results	Partial match	Full match	0.93	280.24	13.071	6.60175e+06	83	0	No matches found	No matches found	Multiple matches found	Single match found	No matches found	No matches found	No matches found	Single match found	No MS2	6.60175e+06
	C6 H4 Fe S	Invalid mass	No results	No match	No results	-12173.5	161.943	13.075	6.36732e+06	2	0	No matches found	No matches found	No matches found	No matches found	No matches found	No matches found	No matches found	No matches found	No MS2	6.36732e+06
	C17 H26 F2 O7	Full match	No results	No match	No results	4.16	380.166	13.078	1.67173e+07	190	0	No matches found	No matches found	No matches found	No matches found	No matches found	No matches found	No matches found	No matches found	No MS2	1.67173e+07
	C6 H4 Fe S	Invalid mass	No results	No match	No results	-12173.5	161.943	13.743	1.51669e+07	2	0	No matches found	No matches found	No matches found	No matches found	No matches found	No matches found	No matches found	No matches found	No MS2	1.51669e+07
	C15 H26 F2 O7	Full match	No results	No match	No results	4.27	356.166	13.748	6.55474e+06	208	0	No matches found	No matches found	No matches found	No matches found	No matches found	No matches found	No matches found	No matches found	No MS2	6.55474e+06
		No results	No results	No results	No results		135.902	13.756	3.78913e+07	0	0	No matches found	No matches found	No matches found	No matches found	No matches found	No matches found	No matches found	No matches found	No MS2	3.78913e+07
		No results	No results	No results	No results		137.899	13.876	3.26135e+07	0	0	No matches found	No matches found	No matches found	No matches found	No matches found	No matches found	No matches found	No matches found	No MS2	3.26135e+07
		No results	No results	No results	No results		135.902	13.984	5.49459e+07	0	0	No matches found	No matches found	No matches found	No matches found	No matches found	No matches found	No matches found	No matches found	No MS2	5.49459e+07

## Sheet: DCM_MeOH extract
Table S20: Raw spectral data of E. foeminea dichloromethane/methanol crude extract analyzed using ESI– LC–MS
Name	Formula	Annot. Source: Predicted Compositions	Annot. Source: mzCloud Search	Annot. Source: ChemSpider Search	Annot. Source: MassList Search	Annot. DeltaMass [ppm]	Calc. MW	RT [min]	Area (Max.)	# ChemSpider Results	# mzCloud Results	Mass List Match: Arita Lab 6549 Flavonoid Structure Database	Mass List Match: EFS HRAM Compound Database	Mass List Match: Endogenous Metabolites database 4400 compounds	Mass List Match: Extractables and Leachables HRAM Compound Database	Mass List Match: GC Orbitrap Contaminants Library Compound Database	Mass List Match: GC Orbitrap Flavor and Fragrances Compound Database	Mass List Match: GC Orbitrap Metabolomics Library Compound Database	Mass List Match: Natural Products Atlas 2020_06	MS2	Area: EF_DCM_M_02.raw (F2)
D-Iditol	C6 H14 O6	Full match	No results	Full match	Full match	-0.67	182.079	0.602	1.58369e+07	14	0	No matches found	No matches found	Multiple matches found	No matches found	No matches found	No matches found	No matches found	No matches found	No MS2	1.58369e+07
	C3 H4 N2 O8 P2 S3	Full match	No results	No results	No results	2.72	353.861	0.666	1.51514e+06	0	0	No matches found	No matches found	No matches found	No matches found	No matches found	No matches found	No matches found	No matches found	No MS2	1.51514e+06
	C3 H N3 O6 P2	Full match	No results	No results	No results	-2.61	236.933	0.672	4.75331e+06	0	0	No matches found	No matches found	No matches found	No matches found	No matches found	No matches found	No matches found	No matches found	No MS2	4.75331e+06
		No results	No results	No results	No results		198.815	1.471	1.51755e+07	0	0	No matches found	No matches found	No matches found	No matches found	No matches found	No matches found	No matches found	No matches found	No MS2	1.51755e+07
Tetrachloro(hydrido)iron	H Cl4 Fe	No results	No results	Full match	No results	0.68	196.818	1.471	1.1982e+07	1	0	No matches found	No matches found	No matches found	No matches found	No matches found	No matches found	No matches found	No matches found	No MS2	1.1982e+07
		No results	No results	No results	No results		200.812	1.471	7.35334e+06	0	0	No matches found	No matches found	No matches found	No matches found	No matches found	No matches found	No matches found	No matches found	No MS2	7.35334e+06
1(2H)-Isoquinolinone	C9 H7 N O	Full match	No results	Partial match	Full match	-0.95	145.053	5.355	1.21576e+07	60	0	No matches found	No matches found	Multiple matches found	Multiple matches found	No matches found	No matches found	No matches found	No matches found	No MS2	1.21576e+07
Azelaicacid	C9 H16 O4	Full match	No results	Partial match	Full match	-0.5	188.105	5.845	7.51605e+06	50	0	No matches found	No matches found	Single match found	Multiple matches found	No matches found	No matches found	No matches found	Multiple matches found	No MS2	7.51605e+06
Sch 725674	C18 H32 O5	Full match	No results	Not the top hit	Full match	1.35	328.225	7.092	2.82895e+07	122	0	No matches found	No matches found	No matches found	No matches found	No matches found	No matches found	No matches found	Multiple matches found	No MS2	2.82895e+07
Neorustmicin B	C21 H34 O7	Not the top hit	No results	Not the top hit	Full match	-3.53	398.229	7.423	1.43337e+07	10	0	No matches found	No matches found	No matches found	No matches found	No matches found	No matches found	No matches found	Single match found	No MS2	1.43337e+07
[FAtrihydroxy(18:0)]9_10_13-trihydroxy-11-octadecenoicacid	C18 H34 O5	Full match	No results	Partial match	Full match	1.36	330.241	7.424	9.95673e+07	68	0	No matches found	No matches found	Multiple matches found	No matches found	No matches found	No matches found	No matches found	Multiple matches found	No MS2	9.95673e+07
Hexadecanedioicacid;Thapsicacid	C16 H30 O4	Full match	No results	Partial match	Full match	0.82	286.215	7.544	3.55765e+07	56	0	No matches found	No matches found	Single match found	Multiple matches found	No matches found	No matches found	No matches found	Multiple matches found	No MS2	3.55765e+07
Hydroleptosphol	C19 H30 O6	Not the top hit	No results	Partial match	Full match	-4.83	354.203	7.544	5.51399e+06	13	0	No matches found	No matches found	No matches found	No matches found	No matches found	No matches found	No matches found	Multiple matches found	No MS2	5.51399e+06
10_16-Dihydroxyhexadecanoicacid	C16 H32 O4	Full match	No results	Partial match	Full match	0.83	288.23	7.686	1.53385e+07	19	0	No matches found	No matches found	Single match found	Single match found	No matches found	No matches found	No matches found	No matches found	No MS2	1.53385e+07
Hexyl fumarate	C16 H28 O4	Full match	No results	Full match	Full match	1.13	284.199	7.732	5.37027e+06	80	0	No matches found	No matches found	No matches found	Single match found	No matches found	No matches found	No matches found	Multiple matches found	No MS2	5.37027e+06
Vitexin 2"-O-p-coumarate	C30 H26 O12	No match	No results	No match	Full match	4.09	578.145	7.801	1.5761e+07	3	0	Multiple matches found	No matches found	Single match found	No matches found	No matches found	No matches found	No matches found	Single match found	No MS2	1.5761e+07
Hexadecanedioicacid;Thapsicacid	C16 H30 O4	Full match	No results	Partial match	Full match	0.82	286.215	7.927	7.03353e+06	56	0	No matches found	No matches found	Single match found	Multiple matches found	No matches found	No matches found	No matches found	Multiple matches found	No MS2	7.03353e+06
Hydroxymethyldecylparaben	C18 H28 O4	Full match	No results	Partial match	Full match	1.14	308.199	8.2	9.1175e+06	103	0	No matches found	No matches found	No matches found	No matches found	No matches found	No matches found	No matches found	Multiple matches found	No MS2	9.1175e+06
Phthalic Acid, Bis-N-Pentyl Ester	C18 H26 O4	Not the top hit	No results	Partial match	Full match	1.23	306.183	8.644	6.97776e+06	141	0	No matches found	Single match found	Single match found	Single match found	No matches found	No matches found	No matches found	Multiple matches found	No MS2	6.97776e+06
exo-1,7,7-Trimethylbicyclo(2.2.1)hept-2-yl acrylate	C13 H20 O2	Full match	No results	Partial match	Full match	-0.22	208.146	8.758	7.68029e+06	86	0	No matches found	No matches found	No matches found	Single match found	No matches found	No matches found	No matches found	Multiple matches found	No MS2	7.68029e+06
8-Hydroxyluteolin 4'-methyl ether 7- (6"'-acetylallosyl) (1->2) (6"-acetylglucoside)	C32 H36 O19	No match	No results	Partial match	Full match	-2.87	724.183	9.18	1.30795e+08	3	0	Multiple matches found	No matches found	No matches found	No matches found	No matches found	No matches found	No matches found	No matches found	No MS2	1.30795e+08
	C36 H34 F2 O18	Full match	No results	No results	No results	0.02	792.171	9.18	1.65581e+07	0	0	No matches found	No matches found	No matches found	No matches found	No matches found	No matches found	No matches found	No matches found	No MS2	1.65581e+07
	C30 H32 Cl F N10 O7 P2	Full match	No results	No match	No results	-0.04	760.16	9.18	9.76564e+06	1	0	No matches found	No matches found	No matches found	No matches found	No matches found	No matches found	No matches found	No matches found	No MS2	9.76564e+06
6-Hydroxyluteolin 6-glucoside-7- [ 6"'- (3-hydroxy-3-methylglutaryl) glucoside ]	C33 H38 O21	No match	No results	No match	Full match	-1.89	770.189	9.182	7.44999e+06	2	0	Multiple matches found	No matches found	No matches found	No matches found	No matches found	No matches found	No matches found	No matches found	No MS2	7.44999e+06
L-Tyrosinemethylester	C10 H13 N O3	Full match	No results	Partial match	Full match	-0.27	195.089	9.434	1.1594e+07	149	0	No matches found	No matches found	Single match found	No matches found	No matches found	No matches found	No matches found	Multiple matches found	No MS2	1.1594e+07
(9Z)-(13S)-12_13-Epoxyoctadeca-9_11-dienoicacid	C18 H30 O3	Full match	No results	Partial match	Full match	1.04	294.22	10.004	2.38786e+07	74	0	No matches found	No matches found	Multiple matches found	No matches found	No matches found	No matches found	No matches found	Multiple matches found	No MS2	2.38786e+07
(9S_10S)-9_10-Dihydroxyoctadecanoate	C18 H36 O4	Full match	No results	Partial match	Full match	1.37	316.262	10.021	7.39087e+06	36	0	No matches found	No matches found	Single match found	No matches found	No matches found	No matches found	No matches found	No matches found	No MS2	7.39087e+06
(9Z)-(13S)-12_13-Epoxyoctadeca-9_11-dienoicacid	C18 H30 O3	Not the top hit	No results	Partial match	Full match	1.04	294.22	10.083	3.54753e+07	74	0	No matches found	No matches found	Multiple matches found	No matches found	No matches found	No matches found	No matches found	Multiple matches found	No MS2	3.54753e+07
[FA(18:3)]13S-hydroperoxy-9Z_11E_14Z-octadecatrienoicacid	C18 H30 O4	Not the top hit	No results	Partial match	Full match	1.25	310.215	10.267	1.63837e+07	67	0	No matches found	No matches found	Multiple matches found	No matches found	No matches found	No matches found	No matches found	Multiple matches found	No MS2	1.63837e+07
6-beta-Hydrocortisol	C21 H30 O6	Not the top hit	No results	No match	Full match	-4.28	378.203	10.272	1.16239e+07	1	0	No matches found	Single match found	No matches found	No matches found	No matches found	No matches found	No matches found	Multiple matches found	No MS2	1.16239e+07
(9Z_15Z)-(13S)-12_13-Epoxyoctadeca-9_11_15-trienoicacid	C18 H28 O3	Full match	No results	Partial match	Full match	1.03	292.204	10.279	7.31763e+07	58	0	No matches found	No matches found	Multiple matches found	Single match found	No matches found	No matches found	No matches found	Multiple matches found	No MS2	7.31763e+07
20-beta-Dihydrocortisol	C21 H32 O5	Not the top hit	No results	Partial match	Full match	-4.57	364.223	10.581	2.18297e+07	64	0	No matches found	Single match found	Multiple matches found	No matches found	No matches found	No matches found	No matches found	Multiple matches found	No MS2	2.18297e+07
[FA(18:0)]12R_13S-epoxy-9Z-octadecenoicacid	C18 H32 O3	Full match	No results	Partial match	Full match	0.95	296.235	10.583	1.86554e+08	67	0	No matches found	No matches found	Multiple matches found	No matches found	No matches found	No matches found	No matches found	Multiple matches found	No MS2	1.86554e+08
Caffeic acid, 3TMS	C18 H32 O4 Si3	No match	No results	No match	Full match	1.32	396.161	10.584	9.79034e+06	278	0	No matches found	No matches found	No matches found	No matches found	No matches found	No matches found	Single match found	No matches found	No MS2	9.79034e+06
(5R,5aS,9R,9aR,9bR)-9,9b-dihydroxy-6,6,9a-trimethyl-1-oxo-1,3,5,5a,6,7,8,9,9a,9b-decahydronaphtho[1,2-c]furan-5-yl hexanoate	C21 H32 O6	Not the top hit	No results	Not the top hit	Full match	-4.16	380.218	10.811	2.01617e+07	35	0	No matches found	No matches found	No matches found	No matches found	No matches found	No matches found	No matches found	Multiple matches found	No MS2	2.01617e+07
(9Z)-(13S)-12_13-Epoxyoctadeca-9_11-dienoicacid	C18 H30 O3	Not the top hit	No results	Partial match	Full match	1.04	294.22	10.812	1.41327e+08	74	0	No matches found	No matches found	Multiple matches found	No matches found	No matches found	No matches found	No matches found	Multiple matches found	No MS2	1.41327e+08
(7S_8S)-DiHODE	C18 H32 O4	Full match	No results	Partial match	Full match	1.26	312.23	10.814	4.14874e+07	97	0	No matches found	No matches found	Multiple matches found	No matches found	No matches found	No matches found	No matches found	Multiple matches found	No MS2	4.14874e+07
	C12 H24 N6 O10	Full match	No results	No match	No results	2.34	412.156	10.817	9.15174e+06	252	0	No matches found	No matches found	No matches found	No matches found	No matches found	No matches found	No matches found	No matches found	No MS2	9.15174e+06
(9Z)-(13S)-12_13-Epoxyoctadeca-9_11-dienoicacid	C18 H30 O3	Not the top hit	No results	Partial match	Full match	1.04	294.22	10.921	2.68882e+07	74	0	No matches found	No matches found	Multiple matches found	No matches found	No matches found	No matches found	No matches found	Multiple matches found	No MS2	2.68882e+07
(9Z)-(13S)-12_13-Epoxyoctadeca-9_11-dienoicacid	C18 H30 O3	Full match	No results	Partial match	Full match	1.04	294.22	11.053	1.74028e+07	74	0	No matches found	No matches found	Multiple matches found	No matches found	No matches found	No matches found	No matches found	Multiple matches found	No MS2	1.74028e+07
2-Oxooctadecanoicacid	C18 H34 O3	Full match	No results	Partial match	Full match	1.06	298.251	11.151	1.03327e+07	59	0	No matches found	No matches found	Single match found	Single match found	No matches found	No matches found	No matches found	Multiple matches found	No MS2	1.03327e+07
[FA(18:0)]12R_13S-epoxy-9Z-octadecenoicacid	C18 H32 O3	Full match	No results	Partial match	Full match	0.95	296.235	11.436	1.55468e+07	67	0	No matches found	No matches found	Multiple matches found	No matches found	No matches found	No matches found	No matches found	Multiple matches found	No MS2	1.55468e+07
Pregna-4_9(11)-diene-3_20-dione	C21 H28 O2	Full match	No results	Partial match	Full match	1.1	312.209	11.46	4.61821e+07	124	0	No matches found	No matches found	Single match found	No matches found	No matches found	No matches found	No matches found	Single match found	No MS2	4.61821e+07
	C14 H25 F3 O8	Full match	No results	No match	No results	1.55	378.151	12.415	9.63104e+06	2	0	No matches found	No matches found	No matches found	No matches found	No matches found	No matches found	No matches found	No matches found	No MS2	9.63104e+06
	C6 H4 Fe S	Invalid mass	No results	No match	No results	-12173.2	161.943	13.08	5.02711e+06	2	0	No matches found	No matches found	No matches found	No matches found	No matches found	No matches found	No matches found	No matches found	No MS2	5.02711e+06
	C17 H26 F2 O7	Full match	No results	No match	No results	4.49	380.166	13.082	1.21006e+07	195	0	No matches found	No matches found	No matches found	No matches found	No matches found	No matches found	No matches found	No matches found	No MS2	1.21006e+07
	C6 H4 Fe S	Invalid mass	No results	No match	No results	-12173.2	161.943	13.746	1.54457e+07	2	0	No matches found	No matches found	No matches found	No matches found	No matches found	No matches found	No matches found	No matches found	No MS2	1.54457e+07
		No results	No results	No results	No results		137.899	13.746	1.036e+07	0	0	No matches found	No matches found	No matches found	No matches found	No matches found	No matches found	No matches found	No matches found	No MS2	1.036e+07
	C15 H26 F2 O7	Full match	No results	No match	No results	4.27	356.166	13.75	4.88446e+06	208	0	No matches found	No matches found	No matches found	No matches found	No matches found	No matches found	No matches found	No matches found	No MS2	4.88446e+06
		No results	No results	No results	No results		135.902	13.754	3.42462e+07	0	0	No matches found	No matches found	No matches found	No matches found	No matches found	No matches found	No matches found	No matches found	No MS2	3.42462e+07
		No results	No results	No results	No results		137.899	13.897	2.04879e+07	0	0	No matches found	No matches found	No matches found	No matches found	No matches found	No matches found	No matches found	No matches found	No MS2	2.04879e+07
		No results	No results	No results	No results		135.902	13.917	4.53545e+07	0	0	No matches found	No matches found	No matches found	No matches found	No matches found	No matches found	No matches found	No matches found	No MS2	4.53545e+07

## Sheet: EtOH extract
Table S21: Raw spectral data of E. foeminea ethanol crude extract analyzed using ESI– LC–MS
Name	Formula	Annot. Source: Predicted Compositions	Annot. Source: mzCloud Search	Annot. Source: ChemSpider Search	Annot. Source: MassList Search	Annot. DeltaMass [ppm]	Calc. MW	RT [min]	Area (Max.)	# ChemSpider Results	# mzCloud Results	Mass List Match: Arita Lab 6549 Flavonoid Structure Database	Mass List Match: EFS HRAM Compound Database	Mass List Match: Endogenous Metabolites database 4400 compounds	Mass List Match: Extractables and Leachables HRAM Compound Database	Mass List Match: GC Orbitrap Contaminants Library Compound Database	Mass List Match: GC Orbitrap Flavor and Fragrances Compound Database	Mass List Match: GC Orbitrap Metabolomics Library Compound Database	Mass List Match: Natural Products Atlas 2020_06	MS2	Area: EF_ETOH_M_03.raw (F3)
D-Iditol	C6 H14 O6	Full match	No results	Full match	Full match	-0.58	182.079	0.597	5.65671e+06	14	0	No matches found	No matches found	Multiple matches found	No matches found	No matches found	No matches found	No matches found	No matches found	No MS2	5.65671e+06
	C4 H6 N O P3 S	Full match	No results	No results	No results	0.65	208.938	0.662	3.51694e+06	0	0	No matches found	No matches found	No matches found	No matches found	No matches found	No matches found	No matches found	No matches found	No MS2	3.51694e+06
	C5 H F4 N2 O2 P3 S2	Full match	No results	No results	No results	-3.98	353.861	0.668	2.70779e+06	0	0	No matches found	No matches found	No matches found	No matches found	No matches found	No matches found	No matches found	No matches found	No MS2	2.70779e+06
	C3 H N3 O6 P2	Full match	No results	No results	No results	-2.74	236.933	0.671	6.4871e+06	0	0	No matches found	No matches found	No matches found	No matches found	No matches found	No matches found	No matches found	No matches found	No MS2	6.4871e+06
		No results	No results	No results	No results		198.815	1.464	1.06035e+07	0	0	No matches found	No matches found	No matches found	No matches found	No matches found	No matches found	No matches found	No matches found	No MS2	1.06035e+07
Tetrachloro(hydrido)iron	H Cl4 Fe	No results	No results	Full match	No results	0.68	196.818	1.464	8.4489e+06	1	0	No matches found	No matches found	No matches found	No matches found	No matches found	No matches found	No matches found	No matches found	No MS2	8.4489e+06
		No results	No results	No results	No results		200.812	1.464	5.21743e+06	0	0	No matches found	No matches found	No matches found	No matches found	No matches found	No matches found	No matches found	No matches found	No MS2	5.21743e+06
1(2H)-Isoquinolinone	C9 H7 N O	Full match	No results	Partial match	Full match	-0.95	145.053	5.413	7.49773e+06	60	0	No matches found	No matches found	Multiple matches found	Multiple matches found	No matches found	No matches found	No matches found	No matches found	No MS2	7.49773e+06
Sch 725674	C18 H32 O5	Full match	No results	Not the top hit	Full match	1.44	328.225	7.093	1.56227e+07	122	0	No matches found	No matches found	No matches found	No matches found	No matches found	No matches found	No matches found	Multiple matches found	No MS2	1.56227e+07
[FAtrihydroxy(18:0)]9_10_13-trihydroxy-11-octadecenoicacid	C18 H34 O5	Full match	No results	Partial match	Full match	1.36	330.241	7.418	3.68339e+07	68	0	No matches found	No matches found	Multiple matches found	No matches found	No matches found	No matches found	No matches found	Multiple matches found	No MS2	3.68339e+07
Neorustmicin B	C21 H34 O7	Not the top hit	No results	No match	Full match	-3.53	398.229	7.42	6.16387e+06	1	0	No matches found	No matches found	No matches found	No matches found	No matches found	No matches found	No matches found	Single match found	No MS2	6.16387e+06
Hexadecanedioicacid;Thapsicacid	C16 H30 O4	Full match	No results	Partial match	Full match	0.82	286.215	7.543	3.88701e+07	56	0	No matches found	No matches found	Single match found	Multiple matches found	No matches found	No matches found	No matches found	Multiple matches found	No MS2	3.88701e+07
Hydroleptosphol	C19 H30 O6	Not the top hit	No results	Partial match	Full match	-4.83	354.203	7.543	5.93981e+06	13	0	No matches found	No matches found	No matches found	No matches found	No matches found	No matches found	No matches found	Multiple matches found	No MS2	5.93981e+06
Koninginin G	C16 H30 O5	Full match	No results	Full match	Full match	1.24	302.21	7.633	4.12408e+06	115	0	No matches found	No matches found	No matches found	No matches found	No matches found	No matches found	No matches found	Multiple matches found	No MS2	4.12408e+06
10_16-Dihydroxyhexadecanoicacid	C16 H32 O4	Full match	No results	Partial match	Full match	0.83	288.23	7.685	1.63035e+07	37	0	No matches found	No matches found	Single match found	Single match found	No matches found	No matches found	No matches found	No matches found	No MS2	1.63035e+07
Vitexin 2"-O-p-coumarate	C30 H26 O12	No match	No results	No match	Full match	4.09	578.145	7.8	2.89771e+07	3	0	Multiple matches found	No matches found	Single match found	No matches found	No matches found	No matches found	No matches found	Single match found	No MS2	2.89771e+07
	C30 H27 F O15	Full match	No results	No match	No results	-0.41	646.133	7.8	4.80099e+06	9	0	No matches found	No matches found	No matches found	No matches found	No matches found	No matches found	No matches found	No matches found	No MS2	4.80099e+06
Vitexin 2"-O-p-coumarate	C30 H26 O12	No match	No results	No match	Full match	4.09	578.145	7.889	8.5913e+06	3	0	Multiple matches found	No matches found	Single match found	No matches found	No matches found	No matches found	No matches found	Single match found	No MS2	8.5913e+06
Hexadecanedioicacid;Thapsicacid	C16 H30 O4	Full match	No results	Partial match	Full match	0.82	286.215	7.924	5.55506e+06	56	0	No matches found	No matches found	Single match found	Multiple matches found	No matches found	No matches found	No matches found	Multiple matches found	No MS2	5.55506e+06
Hydroxymethyldecylparaben	C18 H28 O4	Full match	No results	Partial match	Full match	1.24	308.199	8.198	5.73618e+06	103	0	No matches found	No matches found	No matches found	No matches found	No matches found	No matches found	No matches found	Multiple matches found	No MS2	5.73618e+06
Phthalic Acid, Bis-N-Pentyl Ester	C18 H26 O4	Not the top hit	No results	Partial match	Full match	1.43	306.184	8.642	5.5648e+06	141	0	No matches found	Single match found	Single match found	Single match found	No matches found	No matches found	No matches found	Multiple matches found	No MS2	5.5648e+06
exo-1,7,7-Trimethylbicyclo(2.2.1)hept-2-yl acrylate	C13 H20 O2	Full match	No results	Partial match	Full match	-0.15	208.146	8.755	7.06748e+06	86	0	No matches found	No matches found	No matches found	Single match found	No matches found	No matches found	No matches found	Multiple matches found	No MS2	7.06748e+06
8-Hydroxyluteolin 4'-methyl ether 7- (6"'-acetylallosyl) (1->2) (6"-acetylglucoside)	C32 H36 O19	No match	No results	Partial match	Full match	-3.04	724.183	9.179	1.15162e+08	3	0	Multiple matches found	No matches found	No matches found	No matches found	No matches found	No matches found	No matches found	No matches found	No MS2	1.15162e+08
Plectosphaeroic acid B	C39 H32 N6 O9 S2	No match	No results	No results	Full match	4.97	792.171	9.179	1.34339e+07	0	0	No matches found	No matches found	No matches found	No matches found	No matches found	No matches found	No matches found	Single match found	No MS2	1.34339e+07
	C46 H27 Cl F6 O2	Full match	No results	No match	No results	0.05	760.16	9.181	8.46398e+06	1	0	No matches found	No matches found	No matches found	No matches found	No matches found	No matches found	No matches found	No matches found	No MS2	8.46398e+06
L-Tyrosinemethylester	C10 H13 N O3	Full match	No results	Partial match	Full match	-0.27	195.089	9.429	1.07792e+07	149	0	No matches found	No matches found	Single match found	No matches found	No matches found	No matches found	No matches found	Multiple matches found	No MS2	1.07792e+07
(9Z)-(13S)-12_13-Epoxyoctadeca-9_11-dienoicacid	C18 H30 O3	Not the top hit	No results	Partial match	Full match	1.04	294.22	10.008	3.13647e+07	74	0	No matches found	No matches found	Multiple matches found	No matches found	No matches found	No matches found	No matches found	Multiple matches found	No MS2	3.13647e+07
(9Z)-(13S)-12_13-Epoxyoctadeca-9_11-dienoicacid	C18 H30 O3	Full match	No results	Partial match	Full match	1.04	294.22	10.075	3.47916e+07	74	0	No matches found	No matches found	Multiple matches found	No matches found	No matches found	No matches found	No matches found	Multiple matches found	No MS2	3.47916e+07
[FA(18:3)]13S-hydroperoxy-9Z_11E_14Z-octadecatrienoicacid	C18 H30 O4	Full match	No results	Partial match	Full match	1.25	310.215	10.265	2.31416e+07	107	0	No matches found	No matches found	Multiple matches found	No matches found	No matches found	No matches found	No matches found	Multiple matches found	No MS2	2.31416e+07
6-beta-Hydrocortisol	C21 H30 O6	Not the top hit	No results	No match	Full match	-4.12	378.203	10.266	1.4822e+07	1	0	No matches found	Single match found	No matches found	No matches found	No matches found	No matches found	No matches found	Multiple matches found	No MS2	1.4822e+07
(9Z_15Z)-(13S)-12_13-Epoxyoctadeca-9_11_15-trienoicacid	C18 H28 O3	Full match	No results	Partial match	Full match	1.03	292.204	10.277	9.5582e+07	58	0	No matches found	No matches found	Multiple matches found	Single match found	No matches found	No matches found	No matches found	Multiple matches found	No MS2	9.5582e+07
[FA(18:0)]12R_13S-epoxy-9Z-octadecenoicacid	C18 H32 O3	Full match	No results	Partial match	Full match	0.95	296.235	10.578	1.41061e+08	67	0	No matches found	No matches found	Multiple matches found	No matches found	No matches found	No matches found	No matches found	Multiple matches found	No MS2	1.41061e+08
Caffeic acid, 3TMS	C18 H32 O4 Si3	No match	No results	No match	Full match	1.16	396.161	10.58	7.89841e+06	278	0	No matches found	No matches found	No matches found	No matches found	No matches found	No matches found	Single match found	No matches found	No MS2	7.89841e+06
20-beta-Dihydrocortisol	C21 H32 O5	Not the top hit	No results	No match	Full match	-4.65	364.223	10.581	1.69701e+07	6	0	No matches found	Single match found	Multiple matches found	No matches found	No matches found	No matches found	No matches found	Multiple matches found	No MS2	1.69701e+07
(5R,5aS,9R,9aR,9bR)-9,9b-dihydroxy-6,6,9a-trimethyl-1-oxo-1,3,5,5a,6,7,8,9,9a,9b-decahydronaphtho[1,2-c]furan-5-yl hexanoate	C21 H32 O6	Not the top hit	No results	Not the top hit	Full match	-4.08	380.218	10.807	2.18704e+07	43	0	No matches found	No matches found	No matches found	No matches found	No matches found	No matches found	No matches found	Multiple matches found	No MS2	2.18704e+07
(9Z)-(13S)-12_13-Epoxyoctadeca-9_11-dienoicacid	C18 H30 O3	Not the top hit	No results	Partial match	Full match	1.04	294.22	10.809	1.79824e+08	74	0	No matches found	No matches found	Multiple matches found	No matches found	No matches found	No matches found	No matches found	Multiple matches found	No MS2	1.79824e+08
	C16 H28 O12	Full match	No results	No match	No results	-4.1	412.156	10.809	1.15059e+07	252	0	No matches found	No matches found	No matches found	No matches found	No matches found	No matches found	No matches found	No matches found	No MS2	1.15059e+07
(7S_8S)-DiHODE	C18 H32 O4	Full match	No results	Partial match	Full match	1.26	312.23	10.811	4.8309e+07	97	0	No matches found	No matches found	Multiple matches found	No matches found	No matches found	No matches found	No matches found	Multiple matches found	No MS2	4.8309e+07
(9Z)-(13S)-12_13-Epoxyoctadeca-9_11-dienoicacid	C18 H30 O3	Not the top hit	No results	Partial match	Full match	1.04	294.22	11.049	1.30916e+07	74	0	No matches found	No matches found	Multiple matches found	No matches found	No matches found	No matches found	No matches found	Multiple matches found	No MS2	1.30916e+07
2-Oxooctadecanoicacid	C18 H34 O3	Full match	No results	Partial match	Full match	1.27	298.251	11.153	9.1055e+06	59	0	No matches found	No matches found	Single match found	Single match found	No matches found	No matches found	No matches found	Multiple matches found	No MS2	9.1055e+06
[FA(18:0)]12R_13S-epoxy-9Z-octadecenoicacid	C18 H32 O3	Full match	No results	Partial match	Full match	0.95	296.235	11.35	1.16724e+07	67	0	No matches found	No matches found	Multiple matches found	No matches found	No matches found	No matches found	No matches found	Multiple matches found	No MS2	1.16724e+07
[FAhydroxy(18:0)]12_13-dihydroxy-9Z-octadecenoicacid	C18 H34 O4	Full match	No results	Partial match	Full match	1.27	314.246	11.353	5.90555e+06	49	0	No matches found	No matches found	Multiple matches found	Single match found	No matches found	No matches found	No matches found	Single match found	No MS2	5.90555e+06
[FAhydroxy(18:0)]12_13-dihydroxy-9Z-octadecenoicacid	C18 H34 O4	Full match	No results	Partial match	Full match	1.27	314.246	11.425	4.61513e+06	49	0	No matches found	No matches found	Multiple matches found	Single match found	No matches found	No matches found	No matches found	Single match found	No MS2	4.61513e+06
[FA(18:0)]12R_13S-epoxy-9Z-octadecenoicacid	C18 H32 O3	Full match	No results	Partial match	Full match	0.95	296.235	11.432	1.93625e+07	67	0	No matches found	No matches found	Multiple matches found	No matches found	No matches found	No matches found	No matches found	Multiple matches found	No MS2	1.93625e+07
Pregna-4_9(11)-diene-3_20-dione	C21 H28 O2	Full match	No results	Partial match	Full match	1.1	312.209	11.455	5.4011e+07	124	0	No matches found	No matches found	Single match found	No matches found	No matches found	No matches found	No matches found	Single match found	No MS2	5.4011e+07
	C14 H25 F3 O8	Full match	No results	No match	No results	1.23	378.151	12.405	1.07492e+07	208	0	No matches found	No matches found	No matches found	No matches found	No matches found	No matches found	No matches found	No matches found	No MS2	1.07492e+07
	C17 H26 F2 O7	Full match	No results	No match	No results	4.41	380.166	13.069	6.46953e+06	194	0	No matches found	No matches found	No matches found	No matches found	No matches found	No matches found	No matches found	No matches found	No MS2	6.46953e+06
[FA(18:2)]9Z_11E-octadecadienoicacid	C18 H32 O2	Full match	No results	Partial match	Full match	0.93	280.24	13.07	5.58786e+06	83	0	No matches found	No matches found	Multiple matches found	Single match found	No matches found	No matches found	No matches found	Single match found	No MS2	5.58786e+06
	C6 H4 Fe S	Invalid mass	No results	No match	No results	-12173.4	161.943	13.739	1.36435e+07	2	0	No matches found	No matches found	No matches found	No matches found	No matches found	No matches found	No matches found	No matches found	No MS2	1.36435e+07
	C15 H26 F2 O7	Full match	No results	No match	No results	4.45	356.166	13.742	3.84084e+06	208	0	No matches found	No matches found	No matches found	No matches found	No matches found	No matches found	No matches found	No matches found	No MS2	3.84084e+06
		No results	No results	No results	No results		135.902	13.747	1.87246e+07	0	0	No matches found	No matches found	No matches found	No matches found	No matches found	No matches found	No matches found	No matches found	No MS2	1.87246e+07
		No results	No results	No results	No results		137.899	13.75	9.34515e+06	0	0	No matches found	No matches found	No matches found	No matches found	No matches found	No matches found	No matches found	No matches found	No MS2	9.34515e+06
		No results	No results	No results	No results		137.899	13.904	2.35707e+07	0	0	No matches found	No matches found	No matches found	No matches found	No matches found	No matches found	No matches found	No matches found	No MS2	2.35707e+07
		No results	No results	No results	No results		135.902	13.909	5.87949e+07	0	0	No matches found	No matches found	No matches found	No matches found	No matches found	No matches found	No matches found	No matches found	No MS2	5.87949e+07

## Sheet: EA extract
Table S22: Raw spectral data of E. foeminea ethyl acetate crude extract analyzed using ESI– LC–MS
Name	Formula	Annot. Source: Predicted Compositions	Annot. Source: mzCloud Search	Annot. Source: ChemSpider Search	Annot. Source: MassList Search	Annot. DeltaMass [ppm]	Calc. MW	RT [min]	Area (Max.)	# ChemSpider Results	# mzCloud Results	Mass List Match: GC Orbitrap Contaminants Library Compound Database	Mass List Match: GC Orbitrap Flavor and Fragrances Compound Database	Mass List Match: GC Orbitrap Metabolomics Library Compound Database	Mass List Match: Natural Products Atlas 2020_06	MS2	Area: EFEA_M_01.raw (F5)
D-Iditol	C6 H14 O6	Full match	No results	Full match	Full match	-0.5	182.079	0.591	6.3837e+06	14	0	No matches found	No matches found	No matches found	No matches found	No MS2	6.3837e+06
	C2 H N3 O5 P2	Full match	No results	No results	No results	-3.34	208.938	0.657	3.3637e+06	0	0	No matches found	No matches found	No matches found	No matches found	No MS2	3.3637e+06
	C3 H4 N2 O8 P2 S3	Full match	No results	No results	No results	2.64	353.861	0.66	2.23701e+06	0	0	No matches found	No matches found	No matches found	No matches found	No MS2	2.23701e+06
	C5 H6 N O2 P3 S	Full match	No results	No results	No results	0.91	236.933	0.665	5.26251e+06	0	0	No matches found	No matches found	No matches found	No matches found	No MS2	5.26251e+06
Sch 725674	C18 H32 O5	Full match	No results	Not the top hit	Full match	1.25	328.225	7.081	1.46373e+07	122	0	No matches found	No matches found	No matches found	Multiple matches found	No MS2	1.46373e+07
[FAtrihydroxy(18:0)]9_10_13-trihydroxy-11-octadecenoicacid	C18 H34 O5	Full match	No results	Partial match	Full match	1.36	330.241	7.407	3.83063e+07	68	0	No matches found	No matches found	No matches found	Multiple matches found	No MS2	3.83063e+07
Neorustmicin B	C21 H34 O7	Not the top hit	No results	Partial match	Full match	-3.53	398.229	7.407	5.86686e+06	5	0	No matches found	No matches found	No matches found	Single match found	No MS2	5.86686e+06
Hexadecanedioicacid;Thapsicacid	C16 H30 O4	Full match	No results	Partial match	Full match	0.82	286.215	7.527	5.28199e+07	56	0	No matches found	No matches found	No matches found	Multiple matches found	No MS2	5.28199e+07
	C18 H25 F3 N4	Full match	No results	No match	No results	-1.88	354.202	7.527	7.1755e+06	2	0	No matches found	No matches found	No matches found	No matches found	No MS2	7.1755e+06
Koninginin G	C16 H30 O5	Full match	No results	Not the top hit	Full match	1.45	302.21	7.619	4.31958e+06	115	0	No matches found	No matches found	No matches found	Multiple matches found	No MS2	4.31958e+06
10_16-Dihydroxyhexadecanoicacid	C16 H32 O4	Full match	No results	Partial match	Full match	0.83	288.23	7.668	2.22507e+07	37	0	No matches found	No matches found	No matches found	No matches found	No MS2	2.22507e+07
15α-methoxy-O-methyldihydrobotrydial	C19 H32 O6	Not the top hit	No results	No match	Full match	-4.96	356.218	7.668	3.45483e+06	5	0	No matches found	No matches found	No matches found	Multiple matches found	No MS2	3.45483e+06
Hexyl fumarate	C16 H28 O4	Full match	No results	Full match	Full match	1.02	284.199	7.713	3.90013e+06	80	0	No matches found	No matches found	No matches found	Multiple matches found	No MS2	3.90013e+06
Vitexin 2"-O-p-coumarate	C30 H26 O12	No match	No results	No match	Full match	4.09	578.145	7.781	5.2501e+07	3	0	No matches found	No matches found	No matches found	Single match found	No MS2	5.2501e+07
	C34 H22 Cl F3 N2 O4	Full match	No results	No match	No results	-0.09	614.122	7.781	4.36901e+06	14	0	No matches found	No matches found	No matches found	No matches found	No MS2	4.36901e+06
	C25 H32 N2 O14 P2	Full match	No results	No match	No results	0.21	646.133	7.785	7.89396e+06	9	0	No matches found	No matches found	No matches found	No matches found	No MS2	7.89396e+06
Vitexin 2"-O-p-coumarate	C30 H26 O12	No match	No results	No match	Full match	4.09	578.145	7.872	1.59325e+07	3	0	No matches found	No matches found	No matches found	Single match found	No MS2	1.59325e+07
Hexadecanedioicacid;Thapsicacid	C16 H30 O4	Full match	No results	Partial match	Full match	0.82	286.215	7.907	5.93362e+06	56	0	No matches found	No matches found	No matches found	Multiple matches found	No MS2	5.93362e+06
Hydroxymethyldecylparaben	C18 H28 O4	Not the top hit	No results	Partial match	Full match	1.24	308.199	8.184	5.85309e+06	103	0	No matches found	No matches found	No matches found	Multiple matches found	No MS2	5.85309e+06
Phthalic Acid, Bis-N-Pentyl Ester	C18 H26 O4	Full match	No results	Partial match	Full match	1.13	306.183	8.622	4.89275e+06	141	0	No matches found	No matches found	No matches found	Multiple matches found	No MS2	4.89275e+06
exo-1,7,7-Trimethylbicyclo(2.2.1)hept-2-yl acrylate	C13 H20 O2	Full match	No results	Partial match	Full match	-0.22	208.146	8.733	6.44283e+06	86	0	No matches found	No matches found	No matches found	Multiple matches found	No MS2	6.44283e+06
		No results	No results	No results	No results		724.685	9.155	2.68042e+06	0	0	No matches found	No matches found	No matches found	No matches found	No MS2	2.68042e+06
8-Hydroxyluteolin 4'-methyl ether 7- (6"'-acetylallosyl) (1->2) (6"-acetylglucoside)	C32 H36 O19	No match	No results	No match	Full match	-3.13	724.183	9.158	1.80158e+08	16	0	No matches found	No matches found	No matches found	No matches found	No MS2	1.80158e+08
	C41 H32 F2 N4 O7 P2	Full match	No results	No results	No results	-0.11	792.171	9.159	1.96995e+07	0	0	No matches found	No matches found	No matches found	No matches found	No MS2	1.96995e+07
	C46 H27 Cl F6 O2	Full match	No results	No match	No results	-0.19	760.16	9.16	1.30416e+07	1	0	No matches found	No matches found	No matches found	No matches found	No MS2	1.30416e+07
6-Hydroxyluteolin 6-glucoside-7- [ 6"'- (3-hydroxy-3-methylglutaryl) glucoside ]	C33 H38 O21	No match	No results	No match	Full match	-1.97	770.189	9.162	9.9921e+06	2	0	No matches found	No matches found	No matches found	No matches found	No MS2	9.9921e+06
[FA(18:4)]6Z_9Z_12Z_15Z-octadecatetraenoicacid	C18 H28 O2	Full match	No results	Partial match	Full match	1.13	276.209	9.977	4.16173e+06	78	0	No matches found	No matches found	No matches found	Single match found	No MS2	4.16173e+06
20-beta-Dihydroprednisolone	C21 H30 O5	Not the top hit	No results	Partial match	Full match	-4.78	362.208	9.988	4.50532e+06	105	0	No matches found	No matches found	No matches found	Multiple matches found	No MS2	4.50532e+06
(9Z)-(13S)-12_13-Epoxyoctadeca-9_11-dienoicacid	C18 H30 O3	Full match	No results	Partial match	Full match	0.94	294.22	9.992	3.70185e+07	74	0	No matches found	No matches found	No matches found	Multiple matches found	No MS2	3.70185e+07
(9S_10S)-9_10-Dihydroxyoctadecanoate	C18 H36 O4	Full match	No results	Partial match	Full match	1.47	316.262	10.001	4.8959e+06	36	0	No matches found	No matches found	No matches found	No matches found	No MS2	4.8959e+06
(9Z)-(13S)-12_13-Epoxyoctadeca-9_11-dienoicacid	C18 H30 O3	Not the top hit	No results	Partial match	Full match	0.94	294.22	10.068	3.27906e+07	74	0	No matches found	No matches found	No matches found	Multiple matches found	No MS2	3.27906e+07
20-beta-Dihydroprednisolone	C21 H30 O5	Not the top hit	No results	Partial match	Full match	-4.78	362.208	10.072	4.75104e+06	118	0	No matches found	No matches found	No matches found	Multiple matches found	No MS2	4.75104e+06
[FA(18:3)]13S-hydroperoxy-9Z_11E_14Z-octadecatrienoicacid	C18 H30 O4	Full match	No results	Partial match	Full match	1.25	310.215	10.249	2.98804e+07	107	0	No matches found	No matches found	No matches found	Multiple matches found	No MS2	2.98804e+07
6-beta-Hydrocortisol	C21 H30 O6	Not the top hit	No results	Partial match	Full match	-4.12	378.203	10.252	1.64598e+07	80	0	No matches found	No matches found	No matches found	Multiple matches found	No MS2	1.64598e+07
(9Z_15Z)-(13S)-12_13-Epoxyoctadeca-9_11_15-trienoicacid	C18 H28 O3	Full match	No results	Partial match	Full match	0.93	292.204	10.261	1.1743e+08	58	0	No matches found	No matches found	No matches found	Multiple matches found	No MS2	1.1743e+08
	C15 H21 F3 N4 O6	Full match	No results	No match	No results	-1.44	410.141	10.264	6.16709e+06	203	0	No matches found	No matches found	No matches found	No matches found	No MS2	6.16709e+06
	C31 H51 F N8	Full match	No results	No match	No results	-2.75	554.421	10.555	6.18568e+06	1	0	No matches found	No matches found	No matches found	No matches found	No MS2	6.18568e+06
20-beta-Dihydrocortisol	C21 H32 O5	Not the top hit	No results	Partial match	Full match	-4.65	364.223	10.556	1.66224e+07	70	0	No matches found	No matches found	No matches found	Multiple matches found	No MS2	1.66224e+07
[FA(18:0)]12R_13S-epoxy-9Z-octadecenoicacid	C18 H32 O3	Full match	No results	Partial match	Full match	0.95	296.235	10.557	1.85356e+08	67	0	No matches found	No matches found	No matches found	Multiple matches found	No MS2	1.85356e+08
Caffeic acid, 3TMS	C18 H32 O4 Si3	No match	No results	No match	Full match	1.24	396.161	10.562	1.15673e+07	278	0	No matches found	No matches found	Single match found	No matches found	No MS2	1.15673e+07
	C42 H62 O S	Full match	No results	No match	No results	4.81	614.455	10.563	4.92421e+06	2	0	No matches found	No matches found	No matches found	No matches found	No MS2	4.92421e+06
(9Z)-(13S)-12_13-Epoxyoctadeca-9_11-dienoicacid	C18 H30 O3	Full match	No results	Partial match	Full match	0.94	294.22	10.741	6.18917e+07	74	0	No matches found	No matches found	No matches found	Multiple matches found	No MS2	6.18917e+07
(7S_8S)-DiHODE	C18 H32 O4	Full match	No results	Partial match	Full match	1.26	312.23	10.742	1.55717e+07	97	0	No matches found	No matches found	No matches found	Multiple matches found	No MS2	1.55717e+07
(5R,5aS,9R,9aR,9bR)-9,9b-dihydroxy-6,6,9a-trimethyl-1-oxo-1,3,5,5a,6,7,8,9,9a,9b-decahydronaphtho[1,2-c]furan-5-yl hexanoate	C21 H32 O6	Not the top hit	No results	No match	Full match	-4.08	380.218	10.782	2.4637e+07	3	0	No matches found	No matches found	No matches found	Multiple matches found	No MS2	2.4637e+07
1-Cyclohexyl-3-[3-(1H-imidazol-1-yl)propyl]thiourea	C13 H22 N4 S	Full match	No results	Not the top hit	No results	-4.16	266.155	10.787	1.63364e+07	10	0	No matches found	No matches found	No matches found	No matches found	No MS2	1.63364e+07
(9Z)-(13S)-12_13-Epoxyoctadeca-9_11-dienoicacid	C18 H30 O3	Not the top hit	No results	Partial match	Full match	0.94	294.22	10.788	1.69718e+08	74	0	No matches found	No matches found	No matches found	Multiple matches found	No MS2	1.69718e+08
	C35 H62 F3 N2 O3 P	Full match	No results	No match	No results	0.2	646.445	10.788	7.7864e+06	3	0	No matches found	No matches found	No matches found	No matches found	No MS2	7.7864e+06
	C16 H28 O12	Full match	No results	No match	No results	-4.1	412.156	10.789	1.55481e+07	252	0	No matches found	No matches found	No matches found	No matches found	No MS2	1.55481e+07
(7S_8S)-DiHODE	C18 H32 O4	Full match	No results	Partial match	Full match	1.26	312.23	10.795	4.39725e+07	97	0	No matches found	No matches found	No matches found	Multiple matches found	No MS2	4.39725e+07
(9Z)-(13S)-12_13-Epoxyoctadeca-9_11-dienoicacid	C18 H30 O3	Full match	No results	Partial match	Full match	0.94	294.22	11.03	1.40491e+07	74	0	No matches found	No matches found	No matches found	Multiple matches found	No MS2	1.40491e+07
(9Z)-(13S)-12_13-Epoxyoctadeca-9_11-dienoicacid	C18 H30 O3	Full match	No results	Partial match	Full match	0.94	294.22	11.088	3.74415e+06	74	0	No matches found	No matches found	No matches found	Multiple matches found	No MS2	3.74415e+06
2-Oxooctadecanoicacid	C18 H34 O3	Full match	No results	Partial match	Full match	1.06	298.251	11.142	9.14806e+06	59	0	No matches found	No matches found	No matches found	Multiple matches found	No MS2	9.14806e+06
[FAhydroxy(18:0)]12_13-dihydroxy-9Z-octadecenoicacid	C18 H34 O4	Full match	No results	Partial match	Full match	1.07	314.246	11.329	7.28897e+06	49	0	No matches found	No matches found	No matches found	Single match found	No MS2	7.28897e+06
[FA(18:0)]12R_13S-epoxy-9Z-octadecenoicacid	C18 H32 O3	Full match	No results	Partial match	Full match	0.95	296.235	11.332	1.32054e+07	67	0	No matches found	No matches found	No matches found	Multiple matches found	No MS2	1.32054e+07
[FA(18:0)]12R_13S-epoxy-9Z-octadecenoicacid	C18 H32 O3	Full match	No results	Partial match	Full match	0.95	296.235	11.407	2.7839e+07	67	0	No matches found	No matches found	No matches found	Multiple matches found	No MS2	2.7839e+07
[FAhydroxy(18:0)]12_13-dihydroxy-9Z-octadecenoicacid	C18 H34 O4	Full match	No results	Partial match	Full match	1.07	314.246	11.412	6.94258e+06	49	0	No matches found	No matches found	No matches found	Single match found	No MS2	6.94258e+06
Not named	C21 H34 O6	Not the top hit	No results	No match	Full match	-4.13	382.234	11.413	4.48728e+06	2	0	No matches found	No matches found	No matches found	Multiple matches found	No MS2	4.48728e+06
Pregna-4_9(11)-diene-3_20-dione	C21 H28 O2	Full match	No results	Partial match	Full match	1.39	312.209	11.439	6.28011e+07	124	0	No matches found	No matches found	No matches found	Single match found	No MS2	6.28011e+07
	C14 H25 F3 O8	Full match	No results	No match	No results	1.39	378.151	12.382	1.04506e+07	208	0	No matches found	No matches found	No matches found	No matches found	No MS2	1.04506e+07
[FA(18:1)]9Z-Octadecen-12-ynoicacid	C18 H30 O2	Full match	No results	Partial match	Full match	1.03	278.225	12.383	4.32234e+06	111	0	No matches found	No matches found	No matches found	Multiple matches found	No MS2	4.32234e+06
Xanthoxin;Methoxsalen	C15 H22 O3	Full match	No results	Partial match	Full match	0.53	250.157	12.952	7.45952e+06	265	0	No matches found	No matches found	No matches found	Multiple matches found	No MS2	7.45952e+06
[FA(18:2)]9Z_11E-octadecadienoicacid	C18 H32 O2	Full match	No results	Partial match	Full match	1.15	280.241	13.045	6.06227e+06	83	0	No matches found	No matches found	No matches found	Single match found	No MS2	6.06227e+06
	C14 H27 F3 O8	Full match	No results	No match	No results	1.16	380.166	13.05	1.14692e+07	190	0	No matches found	No matches found	No matches found	No matches found	No MS2	1.14692e+07
	C6 H4 Fe S	Invalid mass	No results	No match	No results	-12173.4	161.943	13.052	5.76335e+06	2	0	No matches found	No matches found	No matches found	No matches found	No MS2	5.76335e+06
2,2'-Methylenebis(6-tert-butyl-4-ethylphenol)	C25 H36 O2	Not the top hit	No results	Full match	Full match	2.07	368.272	13.19	4.19991e+06	37	0	No matches found	No matches found	No matches found	Multiple matches found	No MS2	4.19991e+06
	C34 H37 N6 O2 P	Full match	No results	No match	No results	-0.83	592.271	13.396	4.95578e+06	52	0	No matches found	No matches found	No matches found	No matches found	No MS2	4.95578e+06
	C15 H26 F2 O7	Full match	No results	No match	No results	3.93	356.166	13.711	6.36071e+06	206	0	No matches found	No matches found	No matches found	No matches found	No MS2	6.36071e+06
	C6 H4 Fe S	Invalid mass	No results	No match	No results	-12173.4	161.943	13.719	1.00293e+07	2	0	No matches found	No matches found	No matches found	No matches found	No MS2	1.00293e+07
		No results	No results	No results	No results		135.902	13.733	2.27985e+07	0	0	No matches found	No matches found	No matches found	No matches found	No MS2	2.27985e+07
		No results	No results	No results	No results		137.899	13.827	1.11935e+07	0	0	No matches found	No matches found	No matches found	No matches found	No MS2	1.11935e+07
		No results	No results	No results	No results		135.902	13.831	2.44776e+07	0	0	No matches found	No matches found	No matches found	No matches found	No MS2	2.44776e+07
		No results	No results	No results	No results		135.902	13.973	2.76076e+07	0	0	No matches found	No matches found	No matches found	No matches found	No MS2	2.76076e+07
		No results	No results	No results	No results		137.899	13.976	8.5377e+06	0	0	No matches found	No matches found	No matches found	No matches found	No MS2	8.5377e+06

## Sheet: MeOH extract
Table S23: Raw spectral data of E. foeminea methanol crude extract analyzed using ESI– LC–MS.
Name	Formula	Annot. Source: Predicted Compositions	Annot. Source: mzCloud Search	Annot. Source: ChemSpider Search	Annot. Source: MassList Search	Annot. DeltaMass [ppm]	Calc. MW	RT [min]	Area (Max.)	# ChemSpider Results	# mzCloud Results	Mass List Match: Arita Lab 6549 Flavonoid Structure Database	Mass List Match: EFS HRAM Compound Database	Mass List Match: Endogenous Metabolites database 4400 compounds	Mass List Match: Extractables and Leachables HRAM Compound Database	Mass List Match: GC Orbitrap Contaminants Library Compound Database	Mass List Match: GC Orbitrap Flavor and Fragrances Compound Database	Mass List Match: GC Orbitrap Metabolomics Library Compound Database	Mass List Match: Natural Products Atlas 2020,06	MS2	Area: EF,MEOH,M,01.raw (F4)
D-Iditol	C6 H14 O6	Full match	No results	Full match	Full match	-0.58	182.079	0.598	9.87457e+06	14	0	No matches found	No matches found	Multiple matches found	No matches found	No matches found	No matches found	No matches found	No matches found	No MS2	9.87457e+06
	C2 H N3 O5 P2	Full match	No results	No results	No results	-3.34	208.938	0.66	3.53755e+06	0	0	No matches found	No matches found	No matches found	No matches found	No matches found	No matches found	No matches found	No matches found	No MS2	3.53755e+06
	C3 H4 N2 O8 P2 S3	Full match	No results	No results	No results	2.72	353.861	0.667	2.60943e+06	0	0	No matches found	No matches found	No matches found	No matches found	No matches found	No matches found	No matches found	No matches found	No MS2	2.60943e+06
	C3 H N3 O6 P2	Full match	No results	No results	No results	-2.74	236.933	0.669	4.02436e+06	0	0	No matches found	No matches found	No matches found	No matches found	No matches found	No matches found	No matches found	No matches found	No MS2	4.02436e+06
Tetrachloro(hydrido)iron	H Cl4 Fe	No results	No results	Full match	No results	0.45	196.818	1.469	5.48497e+06	1	0	No matches found	No matches found	No matches found	No matches found	No matches found	No matches found	No matches found	No matches found	No MS2	5.48497e+06
1(2H)-Isoquinolinone	C9 H7 N O	Full match	No results	Partial match	Full match	-1.06	145.053	5.351	1.06228e+07	60	0	No matches found	No matches found	Multiple matches found	Multiple matches found	No matches found	No matches found	No matches found	No matches found	No MS2	1.06228e+07
9,10,13-trihydroxy-11-octadecenoic acid	C18 H34 O5	Full match	No results	Partial match	Full match	1.45	330.241	7.416	7.55509e+07	13	0	No matches found	No matches found	Multiple matches found	No matches found	No matches found	No matches found	No matches found	Multiple matches found	No MS2	7.55509e+07
Thapsic acid	C16 H30 O4	Full match	No results	Partial match	Full match	0.82	286.215	7.541	4.2411e+07	27	0	No matches found	No matches found	Single match found	Multiple matches found	No matches found	No matches found	No matches found	Multiple matches found	No MS2	4.2411e+07
10,16-Dihydroxyhexadecanoic acid	C16 H32 O4	Full match	No results	Partial match	Full match	1.04	288.23	7.681	1.67793e+07	37	0	No matches found	No matches found	Single match found	Single match found	No matches found	No matches found	No matches found	No matches found	No MS2	1.67793e+07
Vitexin 2"-O-p-coumarate	C30 H26 O12	No match	No results	No match	Full match	4.3	578.145	7.799	8.28665e+06	3	0	Multiple matches found	No matches found	Single match found	No matches found	No matches found	No matches found	No matches found	Single match found	No MS2	8.28665e+06
Thapsic acid	C16 H30 O4	Full match	No results	Partial match	Full match	0.82	286.215	7.922	5.14445e+06	56	0	No matches found	No matches found	Single match found	Multiple matches found	No matches found	No matches found	No matches found	Multiple matches found	No MS2	5.14445e+06
Hydroxymethyldecylparaben	C18 H28 O4	Full match	No results	Partial match	Full match	1.14	308.199	8.196	9.953e+06	103	0	No matches found	No matches found	No matches found	No matches found	No matches found	No matches found	No matches found	Multiple matches found	No MS2	9.953e+06
Phthalic acid, Bis-N-Pentyl Ester	C18 H26 O4	Full match	No results	Partial match	Full match	1.13	306.183	8.638	7.11848e+06	141	0	No matches found	Single match found	Single match found	Single match found	No matches found	No matches found	No matches found	Multiple matches found	No MS2	7.11848e+06
exo-1,7,7-Trimethylbicyclo(2.2.1)hept-2-yl acrylate	C13 H20 O2	Full match	No results	Partial match	Full match	-0.15	208.146	8.752	7.00198e+06	86	0	No matches found	No matches found	No matches found	Single match found	No matches found	No matches found	No matches found	Multiple matches found	No MS2	7.00198e+06
8-Hydroxyluteolin 4'-methyl ether 7- (6"'-acetylallosyl) (1->2) (6"-acetylglucoside)	C32 H36 O19	No match	No results	No match	Full match	-3.13	724.183	9.172	5.62012e+07	16	0	Multiple matches found	No matches found	No matches found	No matches found	No matches found	No matches found	No matches found	No matches found	No MS2	5.62012e+07
	C46 H26 F5 N4 O2 P	Full match	No results	No results	No results	0.06	792.171	9.173	6.74989e+06	0	0	No matches found	No matches found	No matches found	No matches found	No matches found	No matches found	No matches found	No matches found	No MS2	6.74989e+06
6Z,9Z,12Z,15Z-octadecatetraenoic acid	C18 H28 O2	Not the top hit	No results	Partial match	Full match	1.13	276.209	9.995	5.37879e+06	78	0	No matches found	No matches found	Single match found	Single match found	No matches found	No matches found	No matches found	Single match found	No MS2	5.37879e+06
20-beta-Dihydroprednisolone	C21 H30 O5	Full match	No results	Partial match	Full match	-4.52	362.208	9.999	8.52072e+06	105	0	No matches found	Single match found	Multiple matches found	No matches found	No matches found	No matches found	No matches found	Multiple matches found	No MS2	8.52072e+06
(9Z)-(13S)-12,13-Epoxyoctadeca-9,11-dienoic acid	C18 H30 O3	Full match	No results	Partial match	Full match	0.94	294.22	10.003	4.39755e+07	74	0	No matches found	No matches found	Multiple matches found	No matches found	No matches found	No matches found	No matches found	Multiple matches found	No MS2	4.39755e+07
(9S,10S)-9,10-Dihydroxyoctadecanoate	C18 H36 O4	Full match	No results	Partial match	Full match	1.37	316.262	10.013	7.59017e+06	36	0	No matches found	No matches found	Single match found	No matches found	No matches found	No matches found	No matches found	No matches found	No MS2	7.59017e+06
(9Z)-(13S)-12,13-Epoxyoctadeca-9,11-dienoic acid	C18 H30 O3	Not the top hit	No results	Partial match	Full match	0.94	294.22	10.084	3.79029e+07	74	0	No matches found	No matches found	Multiple matches found	No matches found	No matches found	No matches found	No matches found	Multiple matches found	No MS2	3.79029e+07
13S-hydroperoxy-9Z,11E,14Z-octadecatrienoic acid	C18 H30 O4	Not the top hit	No results	Partial match	Full match	1.25	310.215	10.262	1.75471e+07	67	0	No matches found	No matches found	Multiple matches found	No matches found	No matches found	No matches found	No matches found	Multiple matches found	No MS2	1.75471e+07
6-beta-Hydrocortisol	C21 H30 O6	Not the top hit	No results	No match	Full match	-4.12	378.203	10.265	1.33359e+07	1	0	No matches found	Single match found	No matches found	No matches found	No matches found	No matches found	No matches found	Multiple matches found	No MS2	1.33359e+07
(9Z,15Z)-(13S)-12,13-Epoxyoctadeca-9,11,15-trienoic acid	C18 H28 O3	Not the top hit	No results	Partial match	Full match	1.03	292.204	10.274	7.3917e+07	58	0	No matches found	No matches found	Multiple matches found	Single match found	No matches found	No matches found	No matches found	Multiple matches found	No MS2	7.3917e+07
20-beta-Dihydrocortisol	C21 H32 O5	Not the top hit	No results	No match	Full match	-4.57	364.223	10.572	2.19403e+07	6	0	No matches found	Single match found	Multiple matches found	No matches found	No matches found	No matches found	No matches found	Multiple matches found	No MS2	2.19403e+07
12R,13S-epoxy-9Z-octadecenoic acid	C18 H32 O3	Full match	No results	Partial match	Full match	0.95	296.235	10.576	1.97727e+08	67	0	No matches found	No matches found	Multiple matches found	No matches found	No matches found	No matches found	No matches found	Multiple matches found	No MS2	1.97727e+08
Caffeic acid, 3TMS	C18 H32 O4 Si3	No match	No results	No match	Full match	1.24	396.161	10.577	1.1062e+07	3	0	No matches found	No matches found	No matches found	No matches found	No matches found	No matches found	Single match found	No matches found	No MS2	1.1062e+07
	C38 H62 O6	Full match	No results	No match	No results	0.74	614.455	10.578	5.54901e+06	2	0	No matches found	No matches found	No matches found	No matches found	No matches found	No matches found	No matches found	No matches found	No MS2	5.54901e+06
(7S,8S)-DiHODE	C18 H32 O4	Full match	No results	Partial match	Full match	1.16	312.23	10.804	3.75388e+07	97	0	No matches found	No matches found	Multiple matches found	No matches found	No matches found	No matches found	No matches found	Multiple matches found	No MS2	3.75388e+07
	C16 H28 O12	Full match	No results	No match	No results	-4.1	412.156	10.804	8.42974e+06	252	0	No matches found	No matches found	No matches found	No matches found	No matches found	No matches found	No matches found	No matches found	No MS2	8.42974e+06
(9Z)-(13S)-12,13-Epoxyoctadeca-9,11-dienoic acid	C18 H30 O3	Not the top hit	No results	Partial match	Full match	0.94	294.22	10.805	1.29234e+08	74	0	No matches found	No matches found	Multiple matches found	No matches found	No matches found	No matches found	No matches found	Multiple matches found	No MS2	1.29234e+08
(9Z)-(13S)-12,13-Epoxyoctadeca-9,11-dienoic acid	C18 H30 O3	Full match	No results	Partial match	Full match	0.94	294.22	10.917	2.06218e+07	74	0	No matches found	No matches found	Multiple matches found	No matches found	No matches found	No matches found	No matches found	Multiple matches found	No MS2	2.06218e+07
(9Z)-(13S)-12,13-Epoxyoctadeca-9,11-dienoic acid	C18 H30 O3	Full match	No results	Partial match	Full match	0.94	294.22	11.047	1.49824e+07	74	0	No matches found	No matches found	Multiple matches found	No matches found	No matches found	No matches found	No matches found	Multiple matches found	No MS2	1.49824e+07
2-Oxooctadecanoic acid	C18 H34 O3	Full match	No results	Partial match	Full match	1.06	298.251	11.149	1.16472e+07	59	0	No matches found	No matches found	Single match found	Single match found	No matches found	No matches found	No matches found	Multiple matches found	No MS2	1.16472e+07
12R,13S-epoxy-9Z-octadecenoic acid	C18 H32 O3	Full match	No results	Partial match	Full match	0.95	296.235	11.431	1.49167e+07	67	0	No matches found	No matches found	Multiple matches found	No matches found	No matches found	No matches found	No matches found	Multiple matches found	No MS2	1.49167e+07
Pregna-4,9(11)-diene-3,20-dione	C21 H28 O2	Full match	No results	Partial match	Full match	1.1	312.209	11.455	4.94852e+07	124	0	No matches found	No matches found	Single match found	No matches found	No matches found	No matches found	No matches found	Single match found	No MS2	4.94852e+07
	C17 H24 F2 O7	Full match	No results	No match	No results	4.25	378.151	12.406	1.37374e+07	208	0	No matches found	No matches found	No matches found	No matches found	No matches found	No matches found	No matches found	No matches found	No MS2	1.37374e+07
9Z-Octadecen-12-ynoic acid	C18 H30 O2	Full match	No results	Partial match	Full match	1.03	278.225	12.406	4.78948e+06	111	0	No matches found	No matches found	Multiple matches found	Multiple matches found	No matches found	No matches found	No matches found	Multiple matches found	No MS2	4.78948e+06
	C17 H26 F2 O7	Full match	No results	No match	No results	4.16	380.166	13.071	1.37677e+07	190	0	No matches found	No matches found	No matches found	No matches found	No matches found	No matches found	No matches found	No matches found	No MS2	1.37677e+07
	C6 H4 Fe S	Invalid mass	No results	No match	No results	-12173.3	161.943	13.071	5.25153e+06	2	0	No matches found	No matches found	No matches found	No matches found	No matches found	No matches found	No matches found	No matches found	No MS2	5.25153e+06
2,2'-Methylenebis(6-tert-butyl-4-ethylphenol)	C25 H36 O2	Full match	No results	Full match	Full match	1.98	368.272	13.207	5.63569e+06	37	0	No matches found	No matches found	No matches found	Single match found	No matches found	No matches found	No matches found	Multiple matches found	No MS2	5.63569e+06
	C6 H4 Fe S	Invalid mass	No results	No match	No results	-12173.3	161.943	13.739	1.60875e+07	2	0	No matches found	No matches found	No matches found	No matches found	No matches found	No matches found	No matches found	No matches found	No MS2	1.60875e+07
	C15 H26 F2 O7	Full match	No results	No match	No results	4.53	356.166	13.741	6.41343e+06	206	0	No matches found	No matches found	No matches found	No matches found	No matches found	No matches found	No matches found	No matches found	No MS2	6.41343e+06
