# Supplementary material for: Untargeted Metabolomic Profiling and Antioxidant Capacities of Different Solvent Crude Extracts of Ephedra foeminea
Source: Metabolites. 2022 May 17;12(5):451. doi: 10.3390/metabo12050451 (PMC9146585; doi:10.3390/metabo12050451)
Supplement: Supplementary file 1 [file metabolites-12-00451-s001.zip › Raw_data_POS_LCMS.xlsx]

## Sheet: Ace extract
Table S14: Raw spectral data of E. foeminea acetone crude extract analyzed using ESI+ LC–MS
Name	Formula	Annot. Source: Predicted Compositions	Annot. Source: mzCloud Search	Annot. Source: ChemSpider Search	Annot. Source: MassList Search	Annot. DeltaMass [ppm]	Calc. MW	RT [min]	Area (Max.)	# ChemSpider Results	# mzCloud Results	mzCloud Best Match	mzCloud Best Match Confidence	Mass List Match: Arita Lab 6549 Flavonoid Structure Database	Mass List Match: EFS HRAM Compound Database	Mass List Match: Endogenous Metabolites database 4400 compounds	Mass List Match: Extractables and Leachables HRAM Compound Database	Mass List Match: Natural Products Atlas 2020_06	MS2	Area: ID_12_EF_ACE_LCMS.raw (F13)
	C26 H49 F O	Full match	No results	No match	No results	-3.51	396.375	0.519	765772	5	0			No matches found	No matches found	No matches found	No matches found	No matches found	DDA for preferred ion	765772
UV6260496	C6 H9 N3	Full match	No results	Full match	No results	-0.76	123.08	0.531	1.05803e+06	50	0			No matches found	No matches found	No matches found	No matches found	No matches found	No MS2	1.05803e+06
N-Methyl-2-pyrrolidone	C5 H9 N O	Full match	Full match	Partial match	Partial match	-1.15	99.0683	0.531	997424	63	4	79	9	No matches found	No matches found	No matches found	Multiple matches found	No matches found	DDA for preferred ion	997424
NP-021293	C30 H48 O4	No match	Invalid mass	No match	No results	-38135.2	454.342	0.536	1.56621e+06	2	5	78	8.9	No matches found	No matches found	No matches found	No matches found	No matches found	DDA for preferred ion	1.56621e+06
Lanosta-8,24-dien-3beta,23-diol	C29 H48 O2	Not the top hit	No results	Partial match	Full match	-0.42	428.365	0.536	1.30069e+06	61	0			No matches found	No matches found	Multiple matches found	No matches found	Single match found	DDA for preferred ion	1.30069e+06
Choline	C5 H13 N O	No results	Invalid mass	No results	No results	17.8	103.102	0.578	4.61436e+06	0	5	71.6	8.6	No matches found	No matches found	No matches found	No matches found	No matches found	DDA for preferred ion	4.61436e+06
		No results	No results	No results	No results		103.098	0.582	2.42457e+06	0	0			No matches found	No matches found	No matches found	No matches found	No matches found	DDA for preferred ion	2.42457e+06
Choline	C5 H13 N O	Full match	Full match	Partial match	Full match	-1.89	103.1	0.583	5.92365e+07	20	5	71.6	8.6	No matches found	No matches found	Single match found	No matches found	No matches found	DDA for preferred ion	5.92365e+07
	C4 H10 F2 N2 O5	Full match	No results	No match	No results	1.17	204.056	0.591	899522	10	0			No matches found	No matches found	No matches found	No matches found	No matches found	DDA for preferred ion	899522
4-Oxo-3,4-dihydroquinazoline-2-carbohydrazide	C9 H8 N4 O2	No match	Invalid mass	No match	No results	-18.75	204.061	0.595	9.86699e+06	2	1	76.8	8.8	No matches found	No matches found	No matches found	No matches found	No matches found	DDA for preferred ion	9.86699e+06
Corymboside	C26 H28 O14	Not the top hit	Full match	Full match	Full match	-1.24	564.147	0.626	1.84233e+06	49	3	94.6	84	Multiple matches found	No matches found	Single match found	No matches found	Single match found	DDA for preferred ion	1.84233e+06
Adenine	C5 H5 N5	Full match	Full match	Partial match	Full match	-1.27	135.054	0.626	1.73508e+06	32	1	85.2	53.1	No matches found	No matches found	Single match found	No matches found	No matches found	DDA for preferred ion	1.73508e+06
2-(Methoxymethyl)furan	C6 H8 O2	Full match	No results	Partial match	Full match	-0.8	112.052	0.626	1.03552e+06	93	0			No matches found	No matches found	Multiple matches found	Multiple matches found	Multiple matches found	DDA for preferred ion	1.03552e+06
		No results	No results	No results	No results		85.0513	0.627	5.30071e+06	0	0			No matches found	No matches found	No matches found	No matches found	No matches found	DDA for preferred ion	5.30071e+06
Buphedrone	C11 H15 N O	Full match	No results	Partial match	Full match	-0.46	177.115	0.627	4.75271e+06	135	0			No matches found	Multiple matches found	No matches found	No matches found	Multiple matches found	No MS2	4.75271e+06
1-Methylamino-1-(3,4-Methylenedioxyphenyl)Propane	C11 H15 N O2	No match	No results	Partial match	Full match	-1.43	193.11	0.627	2.82749e+06	218	0			No matches found	Multiple matches found	Single match found	Multiple matches found	Multiple matches found	No MS2	2.82749e+06
Nicotinamide	C6 H6 N2 O	Full match	Full match	Partial match	Full match	-1.12	122.048	0.627	1.73564e+06	50	1	92.2	63.8	No matches found	No matches found	Single match found	No matches found	No matches found	DDA for preferred ion	1.73564e+06
Kynurenic acid	C10 H7 N O3	Full match	Full match	Partial match	Partial match	-1.07	189.042	0.627	1.18403e+06	90	1	96.2	76.9	No matches found	No matches found	Multiple matches found	No matches found	Multiple matches found	DDA for preferred ion	1.18403e+06
3-(Dimethylamino)propyl acrylate	C8 H15 N O2	Full match	No results	Partial match	Full match	-1.18	157.11	0.627	959946	84	0			No matches found	Single match found	No matches found	Multiple matches found	Single match found	DDA for preferred ion	959946
Gabapentin	C9 H17 N O2	Full match	No results	Full match	Full match	-0.96	171.126	0.627	949216	55	0			No matches found	Single match found	No matches found	Single match found	Single match found	DDA for preferred ion	949216
Acetonecyanohydrin	C4 H7 N O	Full match	No results	Partial match	Full match	-1.94	85.0526	0.628	5.5e+07	47	0			No matches found	No matches found	Single match found	No matches found	No matches found	DDA for preferred ion	5.5e+07
	C9 H17 F3 N4	Full match	No results	No match	No results	4.25	238.142	0.629	896487	1	0			No matches found	No matches found	No matches found	No matches found	No matches found	No MS2	896487
NP-101A	C9 H10 N2 O2	Full match	No results	Partial match	Full match	-1.41	178.074	0.63	1.66203e+07	97	0			No matches found	No matches found	No matches found	No matches found	Single match found	DDA for preferred ion	1.66203e+07
2-Ethyl-2-oxazoline	C5 H9 N O	Full match	No results	Not the top hit	Full match	-1.15	99.0683	0.63	2.04317e+06	63	0			No matches found	No matches found	No matches found	Multiple matches found	No matches found	No MS2	2.04317e+06
exo-1,7,7-Trimethylbicyclo(2.2.1)hept-2-yl acrylate	C13 H20 O2	Not the top hit	No results	Partial match	Full match	-0.35	208.146	0.63	1.11579e+06	86	0			No matches found	No matches found	No matches found	Single match found	Multiple matches found	No MS2	1.11579e+06
(Hydroxyethyl)methacrylate	C6 H10 O3	Full match	No results	Partial match	Full match	-0.73	130.063	0.63	1.0677e+06	104	0			No matches found	No matches found	Multiple matches found	Multiple matches found	Single match found	DDA for preferred ion	1.0677e+06
Aflatoxin G2	C17 H14 O7	No match	Invalid mass	No match	No results	-6.45	330.072	0.631	4.73945e+06	1	6	74	8.7	No matches found	No matches found	No matches found	No matches found	No matches found	DDA for preferred ion	4.73945e+06
2-Amino-6-({[(2-chlorobenzyl)oxy]carbonyl}amino)hexanoic acid	C14 H19 Cl N2 O4	No match	Invalid mass	No match	No match	-18.51	314.098	0.631	3.97999e+06	51	3	65.5	8.3	No matches found	Single match found	No matches found	No matches found	No matches found	DDA for preferred ion	3.97999e+06
Acetonecyanohydrin	C4 H7 N O	Full match	No results	Partial match	Full match	-1.94	85.0526	0.897	3.548e+07	47	0			No matches found	No matches found	Single match found	No matches found	No matches found	DDA for preferred ion	3.548e+07
2,3-Dihydroxysuccinohydrazide	C4 H10 N4 O4	No results	No results	Full match	No results	-1.87	178.07	2.995	2.12717e+06	9	0			No matches found	No matches found	No matches found	No matches found	No matches found	DDA for preferred ion	2.12717e+06
NP-101A	C9 H10 N2 O2	Full match	No results	Partial match	Full match	-1.41	178.074	2.998	2.56503e+07	97	0			No matches found	No matches found	No matches found	No matches found	Single match found	DDA for preferred ion	2.56503e+07
Kynurenic acid	C10 H7 N O3	Full match	Full match	Partial match	Partial match	-0.67	189.042	3.237	2.85162e+06	90	2	95.2	74.4	No matches found	No matches found	Multiple matches found	No matches found	Multiple matches found	DDA for preferred ion	2.85162e+06
MM3670000	C12 H26 O7	Full match	No results	Full match	No results	-0.61	282.168	3.598	2.07229e+06	1	0			No matches found	No matches found	No matches found	No matches found	No matches found	No MS2	2.07229e+06
3,6,9,12,15,18-Hexaoxaicosane-1,20-diol	C14 H30 O8	Full match	No results	Full match	Full match	-0.44	326.194	3.819	1.7161e+06	14	0			No matches found	No matches found	No matches found	Single match found	No matches found	No MS2	1.7161e+06
	C19 H35 F N3 O2 P	Full match	No results	No match	No results	3.03	387.246	4.027	2.10117e+06	4	0			No matches found	No matches found	No matches found	No matches found	No matches found	No MS2	2.10117e+06
Istamycin C1	C19 H37 N5 O6	Full match	No results	Full match	No results	-3.64	431.273	4.216	2.2905e+06	2	0			No matches found	No matches found	No matches found	No matches found	No matches found	No MS2	2.2905e+06
Netilmicin	C21 H41 N5 O7	Full match	No results	Full match	Full match	-3.69	475.299	4.384	2.31308e+06	4	0			No matches found	Single match found	No matches found	No matches found	No matches found	No MS2	2.31308e+06
Skeletocutin P	C29 H44 O9	Not the top hit	No results	No match	Full match	2.57	536.3	4.51	1.82305e+07	25	0			No matches found	No matches found	No matches found	No matches found	Single match found	DDA for preferred ion	1.82305e+07
	C23 H45 N5 O8	Full match	No results	No match	No results	-2.08	519.326	4.533	1.95807e+06	1	0			No matches found	No matches found	No matches found	No matches found	No matches found	No MS2	1.95807e+06
Gageomacrolactin 3	C30 H46 O10	No match	No results	No match	Full match	1.24	566.31	4.534	6.75113e+06	49	0			No matches found	No matches found	No matches found	No matches found	Single match found	DDA for preferred ion	6.75113e+06
	C25 H49 N5 O9	Full match	No results	No match	No results	-1.97	563.352	4.665	1.65802e+06	3	0			No matches found	No matches found	No matches found	No matches found	No matches found	No MS2	1.65802e+06
NP-000919	C11 H18 O4	No match	Invalid mass	No match	No match	-84114.9	196.11	4.71	9.88033e+06	66	4	33	6.7	No matches found	No matches found	No matches found	No matches found	Multiple matches found	DDA for preferred ion	9.88033e+06
(2R,3S,4S,5S,6R)-2-({7-hydroxy-4-[(3Z)-5-hydroxy-3-methylpent-3-en-1-yl]-4a,8,8-trimethyl-3-methylidene-decahydronaphthalen-2-yl}oxy)-6-(hydroxymethyl)oxane-3,4,5-triol	C26 H44 O8	No match	Invalid mass	No match	No match	45394.9	506.289	4.724	4.40717e+06	39	5	75.3	8.8	No matches found	No matches found	No matches found	No matches found	Multiple matches found	DDA for preferred ion	4.40717e+06
NP-000919	C11 H18 O4	No match	Invalid mass	No match	No match	-84114.9	196.11	4.799	5.83309e+06	66	4	33	6.7	No matches found	No matches found	No matches found	No matches found	Multiple matches found	DDA for preferred ion	5.83309e+06
(2R,3S,4S,5S,6R)-2-({7-hydroxy-4-[(3Z)-5-hydroxy-3-methylpent-3-en-1-yl]-4a,8,8-trimethyl-3-methylidene-decahydronaphthalen-2-yl}oxy)-6-(hydroxymethyl)oxane-3,4,5-triol	C26 H44 O8	No match	Invalid mass	No match	No match	45394.9	506.289	4.821	1.46768e+07	39	5	75.3	8.8	No matches found	No matches found	No matches found	No matches found	Multiple matches found	DDA for preferred ion	1.46768e+07
(2R,3S,4S,5S,6R)-2-({7-hydroxy-4-[(3Z)-5-hydroxy-3-methylpent-3-en-1-yl]-4a,8,8-trimethyl-3-methylidene-decahydronaphthalen-2-yl}oxy)-6-(hydroxymethyl)oxane-3,4,5-triol	C26 H44 O8	No match	Invalid mass	No match	No match	45394.9	506.289	4.887	3.42695e+07	39	5	74.1	8.7	No matches found	No matches found	No matches found	No matches found	Multiple matches found	DDA for preferred ion	3.42695e+07
Amoritin	C31 H38 O6	No match	No results	Partial match	Full match	4.57	506.269	4.887	3.2216e+06	67	0			Multiple matches found	No matches found	No matches found	No matches found	No matches found	DDA for preferred ion	3.2216e+06
(2S,3R)-2-Amino-1,3-dodecanediol	C12 H27 N O2	Full match	No results	Full match	No results	-0.35	217.204	5.664	2.50675e+06	5	0			No matches found	No matches found	No matches found	No matches found	No matches found	No MS2	2.50675e+06
3-hydroxy-3,4-bis[(4-hydroxy-3-methoxyphenyl)methyl]oxolan-2-one	C20 H22 O7	No match	Invalid mass	No match	No match	-48138.9	356.126	6.045	2.31993e+06	167	2	36	58	Multiple matches found	No matches found	Single match found	Single match found	Multiple matches found	DDA for preferred ion	2.31993e+06
NP-018660	C13 H22 O3	No match	Invalid mass	No match	No match	-79637.7	208.146	6.406	3.80355e+06	86	2	40.7	59.3	No matches found	No matches found	No matches found	Single match found	Multiple matches found	DDA for preferred ion	3.80355e+06
4-hydroxy-6-[2-(2-methyl-1,2,4a,5,6,7,8,8a-octahydronaphthalen-1-yl)ethyl]oxan-2-one	C18 H28 O3	No match	Invalid mass	No match	No match	-61637.1	274.193	6.518	2.34868e+06	68	4	87.6	80.7	No matches found	No matches found	No matches found	No matches found	Multiple matches found	DDA for preferred ion	2.34868e+06
(11E,15Z)-9,10,13-trihydroxyoctadeca-11,15-dienoic acid	C18 H32 O5	No match	Invalid mass	No match	No results	66972.8	350.207	6.519	1.83335e+06	4	13	97.8	9.9	No matches found	No matches found	No matches found	No matches found	No matches found	DDA for preferred ion	1.83335e+06
NP-017152	C13 H23 N O2	Full match	Full match	Partial match	Partial match	-1.06	225.173	6.658	4.2146e+06	27	1	35.9	6.8	No matches found	No matches found	No matches found	Single match found	Multiple matches found	DDA for preferred ion	4.2146e+06
3-(1′-Hydroxypentyl)phenol	C11 H16 O2	Full match	No results	Partial match	Full match	-1.73	180.115	6.769	3.07718e+06	103	0			No matches found	No matches found	No matches found	Single match found	Multiple matches found	DDA for preferred ion	3.07718e+06
Phloretin	C15 H14 O5	Full match	Full match	Partial match	Not the top hit	-0.78	274.084	6.798	2.18293e+06	127	4	52.2	7.6	Multiple matches found	Single match found	Multiple matches found	Single match found	Multiple matches found	DDA for preferred ion	2.18293e+06
5-Hydroxy-7-(hydroxymethyl)-2-methyl-2-(5-oxotetrahydro-2-furanyl)-2,3-dihydro-4H-chromen-4-one	C15 H16 O6	Not the top hit	Full match	Partial match	Full match	-0.33	292.095	6.805	1.57245e+07	157	3	37.1	38.9	No matches found	No matches found	No matches found	No matches found	Multiple matches found	DDA for preferred ion	1.57245e+07
Coumarin	C9 H6 O2	Full match	Full match	Not the top hit	Partial match	-0.86	146.037	6.805	4.03402e+06	19	4	68.3	47.8	No matches found	No matches found	Multiple matches found	Single match found	Multiple matches found	DDA for preferred ion	4.03402e+06
Kaempferol	C15 H10 O6	Full match	Full match	Full match	Full match	0.67	286.048	6.805	2.08451e+06	69	28	97.5	80.5	Multiple matches found	No matches found	Multiple matches found	No matches found	Multiple matches found	DDA for preferred ion	2.08451e+06
(12Z)-9,10,11-trihydroxyoctadec-12-enoic acid	C18 H34 O5	No match	Invalid mass	No match	No results	66564.1	352.223	6.826	8.67511e+06	2	18	99.5	10	No matches found	No matches found	No matches found	No matches found	No matches found	DDA for preferred ion	8.67511e+06
Palmitoleic Acid	C16 H30 O2	No match	Invalid mass	No match	No match	86476.1	276.209	6.839	3.05193e+06	78	2	80.3	50.3	No matches found	No matches found	Single match found	Single match found	Single match found	DDA for preferred ion	3.05193e+06
(±)13-HpODE	C18 H32 O4	No match	Invalid mass	No match	No match	-57683.2	294.22	6.84	4.31137e+06	74	18	95.5	84.3	No matches found	No matches found	Multiple matches found	No matches found	Multiple matches found	DDA for preferred ion	4.31137e+06
6-heptyl-2H-pyran-2-one	C12 H18 O2	Full match	No results	Partial match	Full match	-0.32	194.131	6.849	3.08401e+06	104	0			No matches found	No matches found	No matches found	No matches found	Multiple matches found	No MS2	3.08401e+06
2-[(3S)-1-(Cyclohexylmethyl)-3-pyrrolidinyl]-1H-benzimidazole-5-carbonitrile	C19 H24 N4	No results	Invalid mass	No match	No results	19.49	308.206	6.87	1.53457e+06	5	4	94.8	9.7	No matches found	No matches found	No matches found	No matches found	No matches found	DDA for preferred ion	1.53457e+06
1,3,6-Octatriene	C8 H12	Full match	No results	Partial match	Full match	-0.74	108.094	6.871	1.91616e+06	60	0			No matches found	No matches found	No matches found	Single match found	Single match found	DDA for preferred ion	1.91616e+06
NP-001596	C16 H30 O4	Full match	Full match	Partial match	Partial match	0.36	286.215	6.872	3.32923e+07	56	30	99.7	10	No matches found	No matches found	Single match found	Multiple matches found	Multiple matches found	DDA for preferred ion	3.32923e+07
1,3,5-Heptatriene	C7 H10	Full match	No results	Full match	No results	-0.99	94.0782	6.872	1.5984e+06	36	0			No matches found	No matches found	No matches found	No matches found	No matches found	DDA for preferred ion	1.5984e+06
3-Methyl-1-phenyl-1,2-nonadiene	C16 H22	Full match	No results	Full match	No results	-0.35	214.172	6.873	4.67504e+06	5	0			No matches found	No matches found	No matches found	No matches found	No matches found	DDA for preferred ion	4.67504e+06
		No results	No results	No results	No results		250.2	6.873	1.78946e+06	0	0			No matches found	No matches found	No matches found	No matches found	No matches found	DDA for preferred ion	1.78946e+06
OPEO	C16 H26 O2	Full match	Full match	Partial match	Not the top hit	0.08	250.193	6.874	2.64388e+07	70	5	68.2	47.7	No matches found	No matches found	Multiple matches found	Multiple matches found	Single match found	DDA for preferred ion	2.64388e+07
NP-001596	C16 H30 O4	No match	Invalid mass	No match	No match	-62927.5	268.204	6.874	6.55651e+06	39	3	80.2	62.1	No matches found	No matches found	No matches found	No matches found	Multiple matches found	DDA for preferred ion	6.55651e+06
Decanophenone	C16 H24 O	Full match	Full match	Partial match	No results	-0.02	232.183	6.874	6.28825e+06	23	2	62.4	43	No matches found	No matches found	No matches found	No matches found	No matches found	DDA for preferred ion	6.28825e+06
Tetranor-12R-HETE	C16 H26 O3	No match	Invalid mass	No match	No match	-67661	248.178	6.884	1.87416e+06	76	3	72.8	45.9	No matches found	No matches found	No matches found	Multiple matches found	Multiple matches found	DDA for preferred ion	1.87416e+06
5-Hydroxy-7-(hydroxymethyl)-2-methyl-2-(5-oxotetrahydro-2-furanyl)-2,3-dihydro-4H-chromen-4-one	C15 H16 O6	Full match	Full match	Partial match	Full match	-0.33	292.095	6.94	5.522e+06	157	4	35.8	38.6	No matches found	No matches found	No matches found	No matches found	Multiple matches found	DDA for preferred ion	5.522e+06
NP-020214	C16 H32 O4	No match	Invalid mass	No match	No results	76264.8	310.212	6.982	2.09918e+06	6	4	84.3	9.2	No matches found	No matches found	No matches found	No matches found	No matches found	DDA for preferred ion	2.09918e+06
Wortmannine F	C16 H28 O2	Full match	No results	Partial match	Full match	-1.05	252.209	6.985	4.0531e+06	71	0			No matches found	No matches found	No matches found	No matches found	Multiple matches found	DDA for preferred ion	4.0531e+06
2,6-di-tert-butyl-4-ethylphenol	C16 H26 O	Full match	No results	Partial match	Full match	-1.23	234.198	6.985	2.72248e+06	42	0			No matches found	No matches found	No matches found	Single match found	No matches found	DDA for preferred ion	2.72248e+06
NP-020214	C16 H32 O4	No match	Invalid mass	No match	No match	-62487.9	270.219	6.985	1.51351e+06	27	2	85.2	53.1	No matches found	No matches found	No matches found	No matches found	Multiple matches found	DDA for preferred ion	1.51351e+06
6-cyclohexyl-5-(cyclohexylimino)-4-thia-6-azaspiro[2.4]heptan-7-one	C17 H26 N2 O S	No match	Invalid mass	No match	No match	-71781.7	284.199	7.009	1.24347e+07	80	4	76.6	8.8	No matches found	No matches found	No matches found	Single match found	Multiple matches found	DDA for preferred ion	1.24347e+07
NP-008563	C16 H28 O4	No match	Invalid mass	No match	No match	-63373.5	266.188	7.014	9.64992e+06	69	4	68.5	47.8	No matches found	No matches found	Multiple matches found	No matches found	Multiple matches found	DDA for preferred ion	9.64992e+06
Tetranor-12R-HETE	C16 H26 O3	No match	Invalid mass	No match	No match	-67661	248.178	7.014	2.34071e+06	76	6	68.7	44	No matches found	No matches found	No matches found	Multiple matches found	Multiple matches found	DDA for preferred ion	2.34071e+06
1-[(2-Hydroxyethyl)amino]-2-dodecanol	C14 H31 N O2	Full match	No results	Full match	No results	0.05	245.235	7.022	8.62418e+06	3	0			No matches found	No matches found	No matches found	No matches found	No matches found	DDA for preferred ion	8.62418e+06
N,N-Dimethyldecylamine N-oxide	C12 H27 N O	Full match	Full match	Full match	No results	-0.02	201.209	7.054	3.37153e+06	5	1	83	51.8	No matches found	No matches found	No matches found	No matches found	No matches found	DDA for preferred ion	3.37153e+06
NP-015468	C20 H16 O4	Full match	Full match	Partial match	Partial match	-0.14	320.105	7.133	2.11063e+06	55	14	57.1	7.9	Multiple matches found	No matches found	No matches found	No matches found	Multiple matches found	DDA for preferred ion	2.11063e+06
tetradecaphytosphingosine	C14 H31 N O3	Full match	No results	Full match	No results	-0.82	261.23	7.158	3.93106e+06	3	0			No matches found	No matches found	No matches found	No matches found	No matches found	DDA for preferred ion	3.93106e+06
NP-001596	C16 H30 O4	No match	Invalid mass	No match	No match	-62927.5	268.204	7.188	8.93293e+06	39	3	87.6	54.5	No matches found	No matches found	No matches found	No matches found	Multiple matches found	DDA for preferred ion	8.93293e+06
NP-001596	C16 H30 O4	No match	Invalid mass	No match	No results	76802.8	308.196	7.188	4.2584e+06	21	13	99.7	10	No matches found	No matches found	No matches found	No matches found	No matches found	DDA for preferred ion	4.2584e+06
OPEO	C16 H26 O2	Full match	Full match	Partial match	Not the top hit	0.08	250.193	7.188	4.24272e+06	70	3	75.7	72.1	No matches found	No matches found	Multiple matches found	Multiple matches found	Single match found	DDA for preferred ion	4.24272e+06
Arthpyrone E	C24 H33 N O8	Not the top hit	No results	No match	Full match	-1.56	463.22	7.232	2.72309e+06	88	0			No matches found	No matches found	No matches found	No matches found	Multiple matches found	DDA for preferred ion	2.72309e+06
2-[1-(2H-1,3-benzodioxol-5-yl)propan-2-yl]-6-methoxy-4-(prop-2-en-1-yl)phenol	C20 H22 O4	Full match	Full match	Partial match	Partial match	0.1	326.152	7.232	1.50513e+06	138	1	36.2	41.9	Multiple matches found	No matches found	No matches found	Single match found	Multiple matches found	DDA for preferred ion	1.50513e+06
Cyprodenate	C13 H25 N O2	Full match	No results	Full match	No results	-0.29	227.188	7.235	7.56162e+06	13	0			No matches found	No matches found	No matches found	No matches found	No matches found	No MS2	7.56162e+06
exo-1,7,7-Trimethylbicyclo(2.2.1)hept-2-yl acrylate	C13 H20 O2	Full match	No results	Partial match	Full match	-0.2	208.146	7.377	1.6319e+06	86	0			No matches found	No matches found	No matches found	Single match found	Multiple matches found	No MS2	1.6319e+06
ML-236C	C18 H26 O3	Full match	No results	Full match	Full match	0.19	290.188	7.424	6.16737e+06	78	0			No matches found	No matches found	No matches found	Single match found	Multiple matches found	DDA for preferred ion	6.16737e+06
Allahabadolactone B	C18 H26 O3	Full match	No results	Partial match	Full match	0.19	290.188	7.506	1.57939e+06	78	0			No matches found	No matches found	No matches found	Single match found	Multiple matches found	DDA for preferred ion	1.57939e+06
Phthalic anhydride	C8 H4 O3	Full match	No results	Full match	Full match	-1.48	148.016	7.518	2.02323e+06	3	0			No matches found	No matches found	No matches found	Single match found	No matches found	No MS2	2.02323e+06
Allahabadolactone B	C18 H26 O3	Full match	No results	Partial match	Full match	0.19	290.188	7.547	1.57597e+06	78	0			No matches found	No matches found	No matches found	Single match found	Multiple matches found	DDA for preferred ion	1.57597e+06
5-(6-hydroxy-6-methyloctyl)-2,5-dihydrofuran-2-one	C13 H22 O3	No match	Invalid mass	No match	No match	-79637.7	208.146	7.689	2.41011e+07	86	6	51.6	62.5	No matches found	No matches found	No matches found	Single match found	Multiple matches found	DDA for preferred ion	2.41011e+07
Bis(methylbenzylidene)sorbitol	C22 H26 O6	Full match	Full match	Partial match	Partial match	-0.58	386.173	7.807	1.1182e+07	334	6	99.6	10	Multiple matches found	No matches found	No matches found	Single match found	Multiple matches found	DDA for preferred ion	1.1182e+07
F1839-B	C24 H33 N O6	Not the top hit	No results	Not the top hit	Full match	-0.2	431.231	7.807	4.34896e+06	149	0			No matches found	No matches found	No matches found	No matches found	Multiple matches found	DDA for preferred ion	4.34896e+06
Styrene	C8 H8	Full match	No results	Full match	Full match	-0.51	104.063	7.807	1.6448e+06	10	0			No matches found	No matches found	No matches found	Single match found	Single match found	DDA for preferred ion	1.6448e+06
Tetranor-12(S)-HETE	C16 H26 O3	No match	Invalid mass	No match	No match	82589.5	288.173	7.815	3.46552e+06	80	3	68.7	8.4	No matches found	No matches found	Multiple matches found	No matches found	Multiple matches found	DDA for preferred ion	3.46552e+06
Andrographolide	C20 H30 O5	No match	Invalid mass	No match	No results	-51434	332.197	7.96	2.42145e+06	80	22	91.5	9.6	No matches found	No matches found	No matches found	No matches found	No matches found	DDA for preferred ion	2.42145e+06
Apigenin 7- (3",6"-di-p-coumarylglucoside)	C39 H32 O14	Not the top hit	No results	Partial match	Full match	0.01	724.179	7.965	6.41029e+06	12	0			Multiple matches found	No matches found	No matches found	No matches found	No matches found	DDA for preferred ion	6.41029e+06
	C13 H25 F N8 O4 P2	Full match	No results	No match	No results	4.73	438.148	7.965	2.07915e+06	138	0			No matches found	No matches found	No matches found	No matches found	No matches found	DDA for preferred ion	2.07915e+06
Coumarin	C9 H6 O2	Full match	Full match	Not the top hit	Partial match	-0.86	146.037	7.966	1.2006e+07	19	10	67.9	47.7	No matches found	No matches found	Multiple matches found	Single match found	Multiple matches found	DDA for preferred ion	1.2006e+07
6-O-[(2E)-3-(4-Hydroxyphenyl)-2-propenoyl]-1-O-[(2E)-3-phenyl-2-propenoyl]-β-D-glucopyranose	C24 H24 O9	No match	Invalid mass	No match	No match	-39484.2	438.132	7.969	2.55534e+07	31	5	72.8	8.6	Single match found	No matches found	No matches found	No matches found	Multiple matches found	DDA for preferred ion	2.55534e+07
(11E,15Z)-9,10,13-trihydroxyoctadeca-11,15-dienoic acid	C18 H32 O5	No match	Invalid mass	No match	No results	66972.8	350.207	7.971	1.75837e+06	4	26	98.5	9.9	No matches found	No matches found	No matches found	No matches found	No matches found	DDA for preferred ion	1.75837e+06
6-O-[(2E)-3-(4-Hydroxyphenyl)-2-propenoyl]-1-O-[(2E)-3-phenyl-2-propenoyl]-β-D-glucopyranose	C24 H24 O9	No match	Invalid mass	No match	No match	-39484.2	438.132	8.014	7.25198e+06	31	5	73.4	8.7	Single match found	No matches found	No matches found	No matches found	Multiple matches found	DDA for preferred ion	7.25198e+06
Coumarin	C9 H6 O2	Full match	Full match	Not the top hit	Partial match	-0.86	146.037	8.017	3.41628e+06	19	8	67.8	47.7	No matches found	No matches found	Multiple matches found	Single match found	Multiple matches found	DDA for preferred ion	3.41628e+06
6-O-[(2E)-3-(4-Hydroxyphenyl)-2-propenoyl]-1-O-[(2E)-3-phenyl-2-propenoyl]-β-D-glucopyranose	C24 H24 O9	No match	Invalid mass	No match	No match	-39484.2	438.132	8.065	3.60522e+06	31	3	73.7	8.7	Single match found	No matches found	No matches found	No matches found	Multiple matches found	DDA for preferred ion	3.60522e+06
Coumarin	C9 H6 O2	Full match	Full match	Not the top hit	Partial match	-0.86	146.037	8.065	2.17718e+06	19	6	66	47.3	No matches found	No matches found	Multiple matches found	Single match found	Multiple matches found	DDA for preferred ion	2.17718e+06
NP-002322	C18 H32 O4	No match	Invalid mass	No match	No results	70402	334.212	8.133	2.1697e+06	2	34	99.8	10	No matches found	No matches found	No matches found	No matches found	No matches found	DDA for preferred ion	2.1697e+06
6-O-[(2E)-3-(4-Hydroxyphenyl)-2-propenoyl]-1-O-[(2E)-3-phenyl-2-propenoyl]-β-D-glucopyranose	C24 H24 O9	No match	Invalid mass	No match	No match	-39484.2	438.132	8.134	1.03646e+07	31	3	72.2	8.6	Single match found	No matches found	No matches found	No matches found	Multiple matches found	DDA for preferred ion	1.03646e+07
Coumarin	C9 H6 O2	Full match	Full match	Not the top hit	Partial match	-0.86	146.037	8.134	4.19901e+06	19	6	68.2	47.7	No matches found	No matches found	Multiple matches found	Single match found	Multiple matches found	DDA for preferred ion	4.19901e+06
Palmitic Acid	C16 H32 O2	No match	Invalid mass	No match	No match	66447.6	273.267	8.206	5.33783e+07	7	2	82.2	51.3	No matches found	No matches found	No matches found	Single match found	No matches found	DDA for preferred ion	5.33783e+07
		No results	No results	No results	No results		273.275	8.208	3.33235e+06	0	0			No matches found	No matches found	No matches found	No matches found	No matches found	DDA for preferred ion	3.33235e+06
		No results	No results	No results	No results		273.258	8.208	1.92195e+06	0	0			No matches found	No matches found	No matches found	No matches found	No matches found	DDA for preferred ion	1.92195e+06
5-(6-hydroxy-6-methyloctyl)-2,5-dihydrofuran-2-one	C13 H22 O3	No match	Invalid mass	No match	No match	-79637.7	208.146	8.215	3.8195e+06	86	2	45	60.6	No matches found	No matches found	No matches found	Single match found	Multiple matches found	DDA for preferred ion	3.8195e+06
Lauryldimethylamine oxide	C14 H31 N O	Full match	No results	Full match	No results	-0.37	229.24	8.255	1.62045e+07	7	0			No matches found	No matches found	No matches found	No matches found	No matches found	DDA for preferred ion	1.62045e+07
Phytosphingosine;D-Ribo-2-amino-1_3_4-Octadecanetriol	C18 H39 N O3	Full match	No results	Partial match	Full match	0.17	317.293	8.273	1.89496e+06	5	0			No matches found	No matches found	Single match found	No matches found	Single match found	No MS2	1.89496e+06
DIHYDROXYETHYL LAURAMINE OXIDE	C16 H35 N O3	Full match	No results	Full match	No results	-1.12	289.261	8.315	1.45103e+07	5	0			No matches found	No matches found	No matches found	No matches found	No matches found	DDA for preferred ion	1.45103e+07
Lauryldimethylamine oxide	C14 H31 N O	Full match	No results	Full match	No results	-0.37	229.24	8.331	3.25014e+06	7	0			No matches found	No matches found	No matches found	No matches found	No matches found	DDA for preferred ion	3.25014e+06
1785113	C16 H33 N O2	Full match	No results	Full match	No results	-1.06	271.251	8.438	1.77062e+06	19	0			No matches found	No matches found	No matches found	No matches found	No matches found	No MS2	1.77062e+06
	C32 H45 F O2 P2	Full match	No results	No match	No results	-0.1	542.288	8.473	2.17885e+06	16	0			No matches found	No matches found	No matches found	No matches found	No matches found	DDA for preferred ion	2.17885e+06
Milbemycin α26	C31 H44 O8	No match	No results	No match	Full match	-0.3	544.303	8.502	1.76584e+06	20	0			No matches found	No matches found	No matches found	No matches found	Multiple matches found	DDA for preferred ion	1.76584e+06
(5Î±,17Î±)-3,3-Difluoropregn-20-yn-17-ol	C21 H30 F2 O	Full match	No results	Not the top hit	No results	2.5	336.227	8.51	1.29531e+06	2	0			No matches found	No matches found	No matches found	No matches found	No matches found	No MS2	1.29531e+06
Eplerenone	C24 H30 O6	Not the top hit	No results	No match	Full match	-0.95	414.204	8.512	3.81836e+06	3	0			No matches found	Single match found	No matches found	Single match found	Multiple matches found	No MS2	3.81836e+06
Hexadecanamide;Palmiticamide	C16 H33 N O	Full match	No results	Partial match	Full match	0.11	255.256	8.582	2.74058e+06	15	0			No matches found	No matches found	Single match found	Single match found	No matches found	No MS2	2.74058e+06
Lauryldimethylamine oxide	C14 H31 N O	Full match	No results	Full match	No results	-0.37	229.24	8.772	2.21111e+06	7	0			No matches found	No matches found	No matches found	No matches found	No matches found	No MS2	2.21111e+06
Milbemycin α26	C31 H44 O8	Full match	No results	Partial match	Full match	0.37	544.304	8.947	1.55413e+06	79	0			No matches found	No matches found	No matches found	No matches found	Multiple matches found	DDA for preferred ion	1.55413e+06
Palmitoleic Acid	C16 H30 O2	No match	Invalid mass	No match	No match	86476.1	276.209	9.139	4.0005e+06	78	4	74.1	53.6	No matches found	No matches found	Single match found	Single match found	Single match found	DDA for preferred ion	4.0005e+06
Palmitoleic Acid	C16 H30 O2	No match	Invalid mass	No match	No match	86476.1	276.209	9.213	4.32689e+06	78	3	75.3	71.8	No matches found	No matches found	Single match found	Single match found	Single match found	DDA for preferred ion	4.32689e+06
Sphinganine;2-Amion-1_3-octadecanediol	C18 H39 N O2	Full match	No results	Partial match	Full match	-0.4	301.298	9.354	4.7409e+06	13	0			No matches found	No matches found	Single match found	No matches found	No matches found	DDA for preferred ion	4.7409e+06
NP-004713	C15 H24 O2	No match	Invalid mass	No match	No match	-76259	218.167	9.368	3.01889e+06	111	10	74.7	54.5	No matches found	No matches found	Multiple matches found	No matches found	Multiple matches found	DDA for preferred ion	3.01889e+06
4-hydroxy-6-[2-(2-methyl-1,2,4a,5,6,7,8,8a-octahydronaphthalen-1-yl)ethyl]oxan-2-one	C18 H28 O3	No match	Invalid mass	No match	No match	-61637.1	274.193	9.368	2.43374e+06	68	8	88.4	55	No matches found	No matches found	No matches found	No matches found	Multiple matches found	DDA for preferred ion	2.43374e+06
Kahweol	C20 H26 O3	No match	Invalid mass	No match	No results	-7.5	314.186	9.371	2.04246e+06	125	16	77.5	48.6	No matches found	No matches found	No matches found	No matches found	No matches found	DDA for preferred ion	2.04246e+06
4-hydroxy-6-[2-(2-methyl-1,2,4a,5,6,7,8,8a-octahydronaphthalen-1-yl)ethyl]oxan-2-one	C18 H28 O3	No match	Invalid mass	No match	No match	-61637.1	274.193	9.488	2.24216e+06	68	8	79.9	50	No matches found	No matches found	No matches found	No matches found	Multiple matches found	DDA for preferred ion	2.24216e+06
	C31 H53 F3 N4 O	Full match	No results	No match	No results	-0.08	554.417	9.624	2.5917e+06	1	0			No matches found	No matches found	No matches found	No matches found	No matches found	DDA for preferred ion	2.5917e+06
α-Eleostearic acid	C18 H30 O2	Not the top hit	Full match	Not the top hit	Partial match	-0.27	278.224	9.659	7.13524e+06	111	20	98.2	83.1	No matches found	No matches found	Multiple matches found	Multiple matches found	Multiple matches found	DDA for preferred ion	7.13524e+06
	C30 H57 F3 O5	Full match	No results	No match	No results	2.64	554.417	9.696	1.29909e+07	1	0			No matches found	No matches found	No matches found	No matches found	No matches found	DDA for preferred ion	1.29909e+07
NP-014287	C18 H32 O3	No match	Invalid mass	No match	No match	-60798.5	278.224	9.714	4.5092e+06	111	20	97.9	81.7	No matches found	No matches found	Multiple matches found	Multiple matches found	Multiple matches found	DDA for preferred ion	4.5092e+06
	C33 H56 N4 O3	Full match	No results	No match	No results	-3.82	556.433	9.798	3.99902e+06	1	0			No matches found	No matches found	No matches found	No matches found	No matches found	DDA for preferred ion	3.99902e+06
	C32 H62 O7	Full match	No results	No match	No results	-0.08	558.45	9.866	1.69404e+06	2	0			No matches found	No matches found	No matches found	No matches found	No matches found	DDA for preferred ion	1.69404e+06
Cafestol	C20 H28 O3	No match	Invalid mass	No match	No match	-69525.7	294.22	9.878	2.09553e+07	74	66	93	9.6	No matches found	No matches found	Multiple matches found	No matches found	Multiple matches found	DDA for preferred ion	2.09553e+07
Palmitoleic Acid	C16 H30 O2	No match	Invalid mass	No match	No match	86476.1	276.209	9.878	1.84746e+07	78	4	82.1	76.7	No matches found	No matches found	Single match found	Single match found	Single match found	DDA for preferred ion	1.84746e+07
Bicyclohexyliden-2-one	C12 H18 O	Full match	No results	Partial match	Full match	-0.8	178.136	9.878	6.92566e+06	70	0			No matches found	No matches found	No matches found	Multiple matches found	Multiple matches found	DDA for preferred ion	6.92566e+06
N-{[(2R,4S,5R)-5-Vinyl-1-azabicyclo[2.2.2]oct-2-yl]methyl}cyclohexanecarboxamide	C17 H28 N2 O	No results	Invalid mass	No results	No results	-12.79	276.217	9.878	1.71735e+06	0	4	53.2	45	No matches found	No matches found	No matches found	No matches found	No matches found	DDA for preferred ion	1.71735e+06
(±)13-HpODE	C18 H32 O4	No match	Invalid mass	No match	No match	-57683.3	294.22	9.949	5.89051e+06	74	12	94.8	84.1	No matches found	No matches found	Multiple matches found	No matches found	Multiple matches found	DDA for preferred ion	5.89051e+06
Palmitoleic Acid	C16 H30 O2	No match	Invalid mass	No match	No match	86476.1	276.209	9.949	4.94297e+06	78	4	79.3	60.8	No matches found	No matches found	Single match found	Single match found	Single match found	DDA for preferred ion	4.94297e+06
	C34 H54 F2 N4	Full match	No results	No match	No results	2.26	556.433	9.982	2.39421e+06	1	0			No matches found	No matches found	No matches found	No matches found	No matches found	DDA for preferred ion	2.39421e+06
Palmitoleic Acid	C16 H30 O2	No match	Invalid mass	No match	No match	86476.1	276.209	10.037	2.2435e+07	78	5	80.2	75.3	No matches found	No matches found	Single match found	Single match found	Single match found	DDA for preferred ion	2.2435e+07
Cafestol	C20 H28 O3	No match	Invalid mass	No match	No match	-69525.6	294.22	10.037	1.56022e+07	74	88	93	9.6	No matches found	No matches found	Multiple matches found	No matches found	Multiple matches found	DDA for preferred ion	1.56022e+07
N-{[(2R,4S,5R)-5-Vinyl-1-azabicyclo[2.2.2]oct-2-yl]methyl}cyclohexanecarboxamide	C17 H28 N2 O	No match	Invalid mass	No match	No results	-12.79	276.217	10.037	1.98648e+06	1	5	47.3	43.9	No matches found	No matches found	No matches found	No matches found	No matches found	DDA for preferred ion	1.98648e+06
5α-hydroxy-3,4-seco-lanosta-4(28),8,24-triene-3,21-dioic acid 3-methyl ester	C31 H48 O5	No match	No results	No match	Full match	-4.45	500.348	10.038	2.2756e+06	1	0			No matches found	No matches found	No matches found	No matches found	Multiple matches found	DDA for preferred ion	2.2756e+06
	C32 H62 O7	Full match	No results	No match	No results	-0.84	558.449	10.061	1.62262e+06	2	0			No matches found	No matches found	No matches found	No matches found	No matches found	DDA for preferred ion	1.62262e+06
Phthalic anhydride	C8 H4 O3	Full match	No results	Full match	Full match	-1.48	148.016	10.07	2.41129e+06	3	0			No matches found	No matches found	No matches found	Single match found	No matches found	No MS2	2.41129e+06
Phthalic anhydride	C8 H4 O3	Full match	No results	Partial match	Full match	-1.48	148.016	10.143	6.66414e+06	3	0			No matches found	No matches found	No matches found	Single match found	No matches found	DDA for preferred ion	6.66414e+06
Palmitoleic Acid	C16 H30 O2	No match	Invalid mass	No match	No match	86476.1	276.209	10.179	2.23121e+07	78	3	82.6	77	No matches found	No matches found	Single match found	Single match found	Single match found	DDA for preferred ion	2.23121e+07
9-Oxo-10(E),12(E)-octadecadienoic acid	C18 H30 O3	Full match	Full match	Full match	Partial match	0.36	294.22	10.179	1.83628e+07	74	24	98.2	92.5	No matches found	No matches found	Multiple matches found	No matches found	Multiple matches found	DDA for preferred ion	1.83628e+07
N-{[(2R,4S,5R)-5-Vinyl-1-azabicyclo[2.2.2]oct-2-yl]methyl}cyclohexanecarboxamide	C17 H28 N2 O	No results	Invalid mass	No results	No results	-12.57	276.217	10.181	2.02296e+06	0	3	53.1	45	No matches found	No matches found	No matches found	No matches found	No matches found	DDA for preferred ion	2.02296e+06
NP-020014	C15 H26 O3	No match	Invalid mass	No match	No match	86487.6	276.172	10.229	2.20578e+06	66	12	80	61.8	No matches found	No matches found	No matches found	Single match found	Multiple matches found	DDA for preferred ion	2.20578e+06
Linoleoyl ethanolamide	C20 H37 N O2	Full match	Full match	Full match	No results	-1.33	323.282	10.761	3.99423e+06	8	12	98.3	9.9	No matches found	No matches found	No matches found	No matches found	No matches found	DDA for preferred ion	3.99423e+06
	C20 H31 F3 O6	Full match	No results	No match	No results	0.33	424.207	10.874	2.30268e+06	1	0			No matches found	No matches found	No matches found	No matches found	No matches found	No MS2	2.30268e+06
Ouabain	C29 H44 O12	No match	Invalid mass	No match	No results	64967.8	622.243	10.948	2.77844e+06	3	2	53.3	41.5	No matches found	No matches found	No matches found	No matches found	No matches found	DDA for preferred ion	2.77844e+06
pheophorbide b	C35 H34 N4 O6	Full match	No results	Full match	No results	-0.07	606.248	11.168	6.31279e+06	15	0			No matches found	No matches found	No matches found	No matches found	No matches found	DDA for preferred ion	6.31279e+06
	C25 H39 F2 N	Full match	No results	No match	No results	2.61	391.306	11.234	1.38407e+06	1	0			No matches found	No matches found	No matches found	No matches found	No matches found	DDA for preferred ion	1.38407e+06
Palmitoyl ethanolamide	C18 H37 N O2	Full match	Full match	Full match	Full match	0.6	299.283	11.276	1.608e+06	55	2	97.3	9.9	No matches found	No matches found	Multiple matches found	No matches found	No matches found	DDA for preferred ion	1.608e+06
4-(Hydroxyamino)-1-({1-hydroxy-1-[2-(hydroxymethyl)-1-pyrrolidinyl]-3-methyl-2-butanyl}amino)-2-pentyl-1,4-butanediol	C19 H41 N3 O5	Full match	No results	Full match	No results	3.72	391.306	11.312	1.46135e+06	2	0			No matches found	No matches found	No matches found	No matches found	No matches found	DDA for preferred ion	1.46135e+06
	C12 H15 Cl2 F2 N6 O2 P	Full match	No results	No match	No results	3.39	414.035	11.398	8.26553e+06	31	0			No matches found	No matches found	No matches found	No matches found	No matches found	No MS2	8.26553e+06
cis-N-Butyl-4-(4-octylphenyl)cyclohexanamine	C24 H41 N	Full match	No results	Full match	No results	-0.71	343.324	11.42	2.60599e+06	6	0			No matches found	No matches found	No matches found	No matches found	No matches found	DDA for preferred ion	2.60599e+06
2-(Tetradecanoylamino)-3-methylbutyric acid 2-deoxy-2-(butyrylamino)-alpha-D-glucopyranosyl ester	C29 H54 N2 O8	No match	No results	Full match	Full match	2.13	558.389	11.468	1.91108e+06	1	0			No matches found	No matches found	No matches found	No matches found	Single match found	DDA for preferred ion	1.91108e+06
Oleoyl ethanolamide	C20 H39 N O2	Full match	Full match	Full match	Full match	-0.74	325.298	11.522	2.25649e+06	17	2	92.9	9.6	No matches found	No matches found	No matches found	Single match found	Single match found	DDA for preferred ion	2.25649e+06
	C21 H42 F N O	Full match	No results	No match	No results	-4.04	343.324	11.623	2.83328e+06	6	0			No matches found	No matches found	No matches found	No matches found	No matches found	DDA for preferred ion	2.83328e+06
NP-010770	C33 H40 N2 O9	No match	Invalid mass	No match	No results	-18.49	608.262	11.86	2.55991e+07	7	10	70.7	44.6	No matches found	No matches found	No matches found	No matches found	No matches found	DDA for preferred ion	2.55991e+07
	C24 H41 F2 N6 O4 P3	Full match	No results	No match	No results	-0.96	608.236	11.86	2.10651e+06	31	0			No matches found	No matches found	No matches found	No matches found	No matches found	DDA for preferred ion	2.10651e+06
	C32 H49 F N3 O8 P	Full match	No results	No match	No results	0.49	653.324	11.91	5.17496e+06	24	0			No matches found	No matches found	No matches found	No matches found	No matches found	DDA for preferred ion	5.17496e+06
NP-018915	C28 H46 N4 O11	No match	Invalid mass	No match	No results	35782.4	636.298	11.91	4.37029e+06	1	1	31	6.6	No matches found	No matches found	No matches found	No matches found	No matches found	DDA for preferred ion	4.37029e+06
	C40 H50 F3 N2 O3 P	Full match	No results	No match	No results	-1.84	694.35	11.91	1.80191e+06	17	0			No matches found	No matches found	No matches found	No matches found	No matches found	No MS2	1.80191e+06
Cryptophycin-19	C34 H41 Cl N2 O7	No match	No results	No match	Full match	-3.79	624.258	12.008	1.45128e+07	4	0			No matches found	No matches found	No matches found	No matches found	Multiple matches found	DDA for preferred ion	1.45128e+07
5'-O-({1-[(2e)-4-(4-Hydroxy-6-Methoxy-7-Methyl-3-Oxo-1,3-Dihydro-2-Benzofuran-5-Yl)-2-Methylbut-2-En-1-Yl]-1h-1,2,3-Triazol-4-Yl}methyl)adenosine	C28 H32 N8 O8	No results	No results	Full match	No results	3.8	608.237	12.147	7.77466e+06	32	0			No matches found	No matches found	No matches found	No matches found	No matches found	DDA for preferred ion	7.77466e+06
NP-010770	C33 H40 N2 O9	No match	Invalid mass	No match	No results	-18.39	608.262	12.152	8.25513e+07	9	8	66.4	43.6	No matches found	No matches found	No matches found	No matches found	No matches found	DDA for preferred ion	8.25513e+07
Decamethylcyclopentasiloxane	C10 H30 O5 Si5	Unused	No results	Full match	Full match	-0.1	370.094	12.273	5.18871e+06	111	0			No matches found	No matches found	No matches found	Single match found	Single match found	DDA for preferred ion	5.18871e+06
1-{2-[(11aS)-5-(4-Isopropylphenyl)-1,3-dioxo-5,6,11,11a-tetrahydro-1H-imidazo[1',5':1,6]pyrido[3,4-b]indol-2(3H)-yl]benzoyl}-4-piperidinecarboxylic acid	C35 H34 N4 O5	Full match	No results	Full match	No results	-1.25	590.252	12.344	1.02995e+07	16	0			No matches found	No matches found	No matches found	No matches found	No matches found	DDA for preferred ion	1.02995e+07
	C17 H43 F5 N10 O3 P2	Full match	No results	No match	No results	2.36	592.293	12.36	1.28423e+07	18	0			No matches found	No matches found	No matches found	No matches found	No matches found	DDA for preferred ion	1.28423e+07
2-(Allyl{4-[(2-ethyl-5,7-dimethyl-3H-imidazo[4,5-b]pyridin-3-yl)methyl]phenyl}amino)-2-phenyl-N-(phenylsulfonyl)acetamide	C34 H35 N5 O3 S	No results	No results	Full match	No results	4.05	593.248	12.363	3.07225e+06	13	0			No matches found	No matches found	No matches found	No matches found	No matches found	DDA for preferred ion	3.07225e+06
3-[(3S,4S,21R)-14-Ethyl-21-(methoxycarbonyl)-4,8,13,18-tetramethyl-20-oxo-9-vinyl-3-phorbinyl]propanoic acid	C35 H36 N4 O5	Full match	No results	Full match	No results	-0.25	592.268	12.365	1.49248e+08	33	0			No matches found	No matches found	No matches found	No matches found	No matches found	DDA for preferred ion	1.49248e+08
3-[(3S,4S,21R)-14-Ethyl-21-(methoxycarbonyl)-4,8,13,18-tetramethyl-20-oxo-9-vinyl-3-phorbinyl]propanoic acid	C35 H36 N4 O5	Full match	No results	Full match	No results	-0.25	592.268	12.549	4.38752e+07	33	0			No matches found	No matches found	No matches found	No matches found	No matches found	DDA for preferred ion	4.38752e+07
	C20 H44 N6 O14	Full match	No results	No match	No results	2.27	592.293	12.549	3.46113e+06	18	0			No matches found	No matches found	No matches found	No matches found	No matches found	DDA for preferred ion	3.46113e+06
N-[2-(3,4-Dimethoxyphenyl)ethyl]-2-({2-[2-(1-piperidinyl)ethyl][1,2,4]triazolo[1,5-c]quinazolin-5-yl}sulfanyl)acetamide	C28 H34 N6 O3 S	No results	No results	Full match	No results	0.93	534.242	12.702	1.52926e+06	45	0			No matches found	No matches found	No matches found	No matches found	No matches found	DDA for preferred ion	1.52926e+06
SB236057A	C33 H34 N4 O3	Not the top hit	Full match	Not the top hit	No match	-0.77	534.263	12.705	2.5896e+07	42	4	76.6	8.8	No matches found	No matches found	No matches found	No matches found	Multiple matches found	DDA for preferred ion	2.5896e+07
5-Olefin phenylpyropene A	C32 H36 O9	Not the top hit	No results	Not the top hit	Full match	2.86	564.238	12.716	1.81958e+07	19	0			No matches found	No matches found	No matches found	No matches found	Single match found	DDA for preferred ion	1.81958e+07
(2E,4S)-4-[(2-Oxohexadecanoyl)amino]-2-octenoic acid	C24 H43 N O4	Full match	No results	Not the top hit	No results	0.58	409.319	12.802	1.44088e+06	9	0			No matches found	No matches found	No matches found	No matches found	No matches found	DDA for preferred ion	1.44088e+06
Octyl isothiocyanate	C9 H17 N S	Full match	No results	Full match	No results	-0.44	171.108	12.947	2.50303e+06	5	0			No matches found	No matches found	No matches found	No matches found	No matches found	No MS2	2.50303e+06
(1R,9S)-5-[(E)-2-(4-Chlorophenyl)vinyl]-11-(5-pyrimidinylcarbonyl)-7,11-diazatricyclo[7.3.1.02,7]trideca-2,4-dien-6-one	C24 H21 Cl N4 O2	No match	Invalid mass	No match	No results	87848.1	470.098	12.948	8.94284e+06	62	3	52.2	7.6	No matches found	No matches found	No matches found	No matches found	No matches found	DDA for preferred ion	8.94284e+06
N-dodecanoylsphinganine	C30 H61 N O3	Full match	No results	Full match	No results	-0.27	483.465	13.034	2.59772e+06	1	0			No matches found	No matches found	No matches found	No matches found	No matches found	DDA for preferred ion	2.59772e+06
N-{4-[4-(4-Chlorophenyl)-1-piperazinyl]benzyl}-2-(dibenzo[b,d]thiophen-2-yl)imidazo[1,2-a]pyridine-3-carboxamide	C37 H30 Cl N5 O S	Full match	No results	Full match	No results	1.07	627.187	13.091	4.55169e+06	1	0			No matches found	No matches found	No matches found	No matches found	No matches found	No MS2	4.55169e+06
Decamethylcyclopentasiloxane	C10 H30 O5 Si5	Invalid mass	No results	Full match	Full match	-0.76	370.094	13.091	1.4519e+06	111	0			No matches found	No matches found	No matches found	Single match found	Single match found	No MS2	1.4519e+06
Uvidin-A lactarinate	C34 H58 O5	Not the top hit	No results	Partial match	Full match	0.03	546.428	13.166	3.87948e+06	2	0			No matches found	No matches found	No matches found	No matches found	Single match found	DDA for preferred ion	3.87948e+06
	C26 H33 Cl F N7 O3 S2	Full match	No results	No match	No results	0.41	609.176	13.462	9.60638e+06	24	0			No matches found	No matches found	No matches found	No matches found	No matches found	DDA for preferred ion	9.60638e+06
	C36 H57 F3 O3	Full match	No results	No match	No results	-1.28	594.425	13.484	1.92009e+06	2	0			No matches found	No matches found	No matches found	No matches found	No matches found	DDA for preferred ion	1.92009e+06
Pestalpolyol D	C34 H60 O5	Full match	No results	Partial match	Full match	0.61	548.444	13.628	6.90752e+06	2	0			No matches found	No matches found	No matches found	No matches found	Single match found	DDA for preferred ion	6.90752e+06
N-(2-Aminoethyl)-N'-(1,5-dicyclohexyl-3-pentanyl)-1,2-ethanediamine	C21 H43 N3	Full match	No results	Full match	No results	0.25	337.346	13.635	942051	4	0			No matches found	No matches found	No matches found	No matches found	No matches found	DDA for preferred ion	942051
Erucamide	C22 H43 N O	Full match	Full match	Full match	Full match	0.62	337.335	13.636	1.47474e+07	16	2	95.1	83.4	No matches found	No matches found	No matches found	Single match found	No matches found	DDA for preferred ion	1.47474e+07
Merocyclophane C	C36 H56 O5	No match	No results	Not the top hit	Full match	-4.42	568.41	13.733	1.9097e+06	17	0			No matches found	No matches found	No matches found	No matches found	Multiple matches found	DDA for preferred ion	1.9097e+06
	C34 H61 N O5	Full match	No results	No results	No results	-0.27	563.455	13.733	1.46741e+06	0	0			No matches found	No matches found	No matches found	No matches found	No matches found	DDA for preferred ion	1.46741e+06
NP-014287	C18 H32 O3	No match	Invalid mass	No match	No match	-60798.5	278.224	13.751	6.39854e+06	111	20	97.5	80.7	No matches found	No matches found	Multiple matches found	Multiple matches found	Multiple matches found	DDA for preferred ion	6.39854e+06
	C44 H35 Cl2 F2 N O	Full match	No results	Unused	No results	-0.39	701.206	13.757	6.50428e+06	5	0			No matches found	No matches found	No matches found	No matches found	No matches found	DDA for preferred ion	6.50428e+06
	C41 H78 F N O4 P2	Full match	No results	No match	No results	-0.28	729.539	13.78	6.3989e+06	2	0			No matches found	No matches found	No matches found	No matches found	No matches found	DDA for preferred ion	6.3989e+06
	C34 H57 F3 O3	Full match	No results	No match	No results	0.27	570.426	13.946	1.75419e+06	17	0			No matches found	No matches found	No matches found	No matches found	No matches found	DDA for preferred ion	1.75419e+06
R-(+)-N-[15-methyl-3-(13-methyl-4Z-tetradecenoyloxy)-hexadecanoyl]glycine	C34 H63 N O5	Not the top hit	No results	No results	Full match	-1.18	565.47	13.948	1.53334e+06	0	0			No matches found	No matches found	No matches found	No matches found	Single match found	DDA for preferred ion	1.53334e+06

## Sheet: DCM_MeOH extract
Table S15: Raw spectral data of E. foeminea dichloromethane/methanol crude extract analyzed using ESI+ LC–MS
Name	Formula	Annot. Source: Predicted Compositions	Annot. Source: mzCloud Search	Annot. Source: ChemSpider Search	Annot. Source: MassList Search	Annot. DeltaMass [ppm]	Calc. MW	RT [min]	Area (Max.)	# ChemSpider Results	# mzCloud Results	mzCloud Best Match	mzCloud Best Match Confidence	Mass List Match: Arita Lab 6549 Flavonoid Structure Database	Mass List Match: EFS HRAM Compound Database	Mass List Match: Endogenous Metabolites database 4400 compounds	Mass List Match: Extractables and Leachables HRAM Compound Database	Mass List Match: Natural Products Atlas 2020_06	MS2	Area: EF.raw (F6)
4-methylpyridine-2,3-diamine	C6 H9 N3	Full match	No results	Full match	No results	-0.89	123.08	1.027	1.88599e+06	21	0			No matches found	No matches found	No matches found	No matches found	No matches found	No MS2	1.88599e+06
	C31 H31 Cl F N S2	Full match	No results	No match	No results	2.59	535.158	1.028	8.21827e+06	66	0			No matches found	No matches found	No matches found	No matches found	No matches found	No MS2	8.21827e+06
	C3 H F4 P	Full match	No results	No match	No results	-3.45	143.975	1.028	8.02477e+06	1	0			No matches found	No matches found	No matches found	No matches found	No matches found	No MS2	8.02477e+06
	C5 H F2 O P	Full match	No results	No results	No results	-3.19	145.973	1.028	3.65529e+06	0	0			No matches found	No matches found	No matches found	No matches found	No matches found	No MS2	3.65529e+06
N,N-Dimethylaniline	C8 H11 N	Full match	Full match	Partial match	Partial match	-1.56	121.089	1.028	2.1833e+06	21	5	92.8	9.6	No matches found	No matches found	Multiple matches found	Multiple matches found	No matches found	DDA for preferred ion	2.1833e+06
	C51 H80 F2 O	Full match	No results	No results	No results	0.08	746.618	1.028	1.68251e+06	0	0			No matches found	No matches found	No matches found	No matches found	No matches found	DDA for preferred ion	1.68251e+06
octadec-9-ynoic acid	C18 H32 O2	No match	Invalid mass	No match	No match	-64269.1	262.229	1.028	1.5977e+06	15	1	92.4	83.2	No matches found	No matches found	No matches found	Multiple matches found	No matches found	DDA for preferred ion	1.5977e+06
NP-011548	C18 H34 O3	No match	Invalid mass	No match	No match	-60387.1	280.24	1.028	1.58214e+06	47	1	90.7	82.6	No matches found	No matches found	Multiple matches found	Single match found	Single match found	DDA for preferred ion	1.58214e+06
Muscone	C16 H30 O	Full match	Full match	Full match	Partial match	-0.59	238.23	1.028	1.27151e+06	6	1	70	44.2	No matches found	No matches found	Single match found	No matches found	Multiple matches found	DDA for preferred ion	1.27151e+06
4_4'-Diapophytoene	C30 H48	Not the top hit	No results	Partial match	Full match	-0.16	408.376	1.028	1.24797e+06	6	0			No matches found	No matches found	Single match found	No matches found	No matches found	DDA for preferred ion	1.24797e+06
	C38 H65 F3 O4	Full match	No results	No results	No results	-0.17	642.483	1.028	941799	0	0			No matches found	No matches found	No matches found	No matches found	No matches found	DDA for preferred ion	941799
5,7-Diisopropyl-1,1-dimethyl-1,2,3,4-tetrahydronaphthalene	C18 H28	Full match	No results	Full match	No results	-0.8	244.219	1.028	916709	1	0			No matches found	No matches found	No matches found	No matches found	No matches found	DDA for preferred ion	916709
		No results	No results	No results	No results		769.694	1.028	825320	0	0			No matches found	No matches found	No matches found	No matches found	No matches found	DDA for preferred ion	825320
Pristinol	C16 H28	Full match	No results	No results	Full match	-0.2	220.219	1.028	773008	0	0			No matches found	No matches found	No matches found	No matches found	Single match found	DDA for preferred ion	773008
	C25 H53 F3 N4 O4	Full match	No results	No match	No results	-2.85	530.4	1.028	598296	2	0			No matches found	No matches found	No matches found	No matches found	No matches found	DDA for preferred ion	598296
5,6-dihydrotoluene	C7 H10	Full match	No results	Full match	No results	-1.23	94.0781	1.028	474495	3	0			No matches found	No matches found	No matches found	No matches found	No matches found	DDA for preferred ion	474495
		No results	No results	No results	No results		120.959	1.029	6.21451e+06	0	0			No matches found	No matches found	No matches found	No matches found	No matches found	DDA for preferred ion	6.21451e+06
		No results	No results	No results	No results		122.957	1.029	2.69479e+06	0	0			No matches found	No matches found	No matches found	No matches found	No matches found	No MS2	2.69479e+06
		No results	No results	No results	No results		102.948	1.029	2.20541e+06	0	0			No matches found	No matches found	No matches found	No matches found	No matches found	No MS2	2.20541e+06
	C38 H71 N O6	Full match	No results	No results	No results	-0.89	637.528	1.029	1.99417e+06	0	0			No matches found	No matches found	No matches found	No matches found	No matches found	DDA for preferred ion	1.99417e+06
	C40 H75 N O6	Full match	No results	No match	No results	-0.28	665.559	1.029	1.36487e+06	1	0			No matches found	No matches found	No matches found	No matches found	No matches found	DDA for preferred ion	1.36487e+06
diisopropylethylamine	C8 H19 N	Full match	No results	Partial match	Full match	-1.88	129.152	1.029	1.3559e+06	6	0			No matches found	No matches found	No matches found	Multiple matches found	No matches found	No MS2	1.3559e+06
(2S, 3S, 4R)-2-[(2'R)-2'-hydroxydocosanoylamino]-1, 3, 4-octadecanetriol	C40 H81 N O5	Full match	No results	Full match	Full match	0.13	655.612	1.029	1.13706e+06	3	0			No matches found	No matches found	No matches found	No matches found	Single match found	DDA for preferred ion	1.13706e+06
		No results	No results	No results	No results		120.956	1.029	1.00965e+06	0	0			No matches found	No matches found	No matches found	No matches found	No matches found	DDA for preferred ion	1.00965e+06
		No results	No results	No results	No results		104.946	1.029	915289	0	0			No matches found	No matches found	No matches found	No matches found	No matches found	No MS2	915289
Acremolin	C11 H13 N5 O	Full match	No results	Not the top hit	Full match	-0.83	231.112	1.029	802064	73	0			No matches found	No matches found	No matches found	No matches found	Single match found	DDA for preferred ion	802064
	C12 H12 Cl F N10 S2	Full match	No results	No match	No results	-1.87	414.035	1.029	579656	31	0			No matches found	No matches found	No matches found	No matches found	No matches found	DDA for preferred ion	579656
N-acetyl-DL-cysteine	C5 H9 N O3 S	Not the top hit	No results	Partial match	Full match	3.79	163.031	1.03	1.16963e+06	9	0			No matches found	No matches found	Single match found	No matches found	No matches found	No MS2	1.16963e+06
1422990	C9 H19 N O2	Full match	No results	Full match	No results	0.32	173.142	1.4	8.60098e+06	32	0			No matches found	No matches found	No matches found	No matches found	No matches found	DDA for preferred ion	8.60098e+06
NP-101A	C9 H10 N2 O2	Full match	No results	Partial match	Full match	-1.75	178.074	3.021	1.04934e+08	67	0			No matches found	No matches found	No matches found	No matches found	Single match found	DDA for preferred ion	1.04934e+08
2,3-Dihydroxysuccinohydrazide	C4 H10 N4 O4	No results	No results	Full match	No results	-2.47	178.07	3.022	1.04952e+07	2	0			No matches found	No matches found	No matches found	No matches found	No matches found	DDA for preferred ion	1.04952e+07
Kynurenic acid	C10 H7 N O3	Full match	Full match	Partial match	Partial match	0.3	189.043	3.199	4.41142e+06	49	5	96.6	78.3	No matches found	No matches found	Multiple matches found	No matches found	Multiple matches found	DDA for preferred ion	4.41142e+06
	C3 H10 F2 N3 O2 P	Full match	No results	No results	No results	-2.75	189.047	3.264	1.01425e+06	0	0			No matches found	No matches found	No matches found	No matches found	No matches found	DDA for preferred ion	1.01425e+06
Kynurenic acid	C10 H7 N O3	Full match	Full match	Partial match	Partial match	0.3	189.043	3.265	1.85956e+07	49	4	96.2	77.1	No matches found	No matches found	Multiple matches found	No matches found	Multiple matches found	DDA for preferred ion	1.85956e+07
MFCD00023759	C16 H25 N3 O	Full match	No results	Full match	No results	0.64	275.2	3.352	6.39628e+06	91	0			No matches found	No matches found	No matches found	No matches found	No matches found	DDA for preferred ion	6.39628e+06
PEG n6	C12 H26 O7	Full match	Full match	Full match	No results	0.04	282.168	3.601	3.06012e+06	26	1	99.1	10	No matches found	No matches found	No matches found	No matches found	No matches found	DDA for preferred ion	3.06012e+06
PEG n7	C14 H30 O8	Full match	Full match	Full match	Full match	0.59	326.194	3.811	2.35521e+06	14	1	98.8	9.9	No matches found	No matches found	No matches found	Single match found	No matches found	DDA for preferred ion	2.35521e+06
	C15 H29 N5 O4	Full match	No results	No match	No results	-3.68	343.221	3.811	1.67321e+06	1	0			No matches found	No matches found	No matches found	No matches found	No matches found	DDA for preferred ion	1.67321e+06
1-{[4-(2,5-dimethyl-1H-pyrrol-1-yl)benzoyl]oxy}dihydro-1H-pyrrole-2,5-dione	C17 H16 N2 O4	No match	Invalid mass	No match	No match	-298156	219.053	3.832	2.76805e+06	68	1	35.2	38.6	No matches found	No matches found	No matches found	No matches found	Multiple matches found	DDA for preferred ion	2.76805e+06
	C17 H33 N5 O5	Full match	No results	No match	No results	-3.58	387.247	3.993	2.56727e+06	4	0			No matches found	No matches found	No matches found	No matches found	No matches found	DDA for preferred ion	2.56727e+06
Istamycin C1	C19 H37 N5 O6	Full match	No results	Full match	No results	-2.58	431.273	4.153	2.90327e+06	2	0			No matches found	No matches found	No matches found	No matches found	No matches found	DDA for preferred ion	2.90327e+06
Z-4-2	C11 H9 N O3	Full match	No results	Partial match	Full match	-0.22	203.058	4.227	4.04223e+06	107	0			No matches found	No matches found	Single match found	No matches found	Single match found	DDA for preferred ion	4.04223e+06
PEG n10	C20 H42 O11	No match	Invalid mass	No match	No match	37153	475.299	4.295	2.91617e+06	3	1	97.2	89.3	No matches found	Single match found	No matches found	No matches found	No matches found	DDA for preferred ion	2.91617e+06
Skeletocutin P	C29 H44 O9	No match	No results	No match	Full match	2.57	536.3	4.372	2.65168e+07	25	0			No matches found	No matches found	No matches found	No matches found	Single match found	DDA for preferred ion	2.65168e+07
Gageomacrolactin 3	C30 H46 O10	No match	No results	No match	Full match	1.24	566.31	4.393	8.88299e+06	55	0			No matches found	No matches found	No matches found	No matches found	Single match found	DDA for preferred ion	8.88299e+06
PEG n11	C22 H46 O12	No match	Invalid mass	No match	No results	33897.6	519.326	4.423	2.6183e+06	1	1	96.2	86.4	No matches found	No matches found	No matches found	No matches found	No matches found	DDA for preferred ion	2.6183e+06
PEG n12	C24 H50 O13	No match	Invalid mass	No match	No results	31166.8	563.352	4.538	2.23859e+06	2	1	97.2	89.3	No matches found	No matches found	No matches found	No matches found	No matches found	DDA for preferred ion	2.23859e+06
	C18 H41 F3 N7 O4 P	Full match	No results	No match	No results	2.64	507.292	4.622	7.56619e+06	15	0			No matches found	No matches found	No matches found	No matches found	No matches found	DDA for preferred ion	7.56619e+06
Speciosin T	C11 H16 O3	Full match	No results	Partial match	Full match	-1.03	196.11	4.628	1.14429e+07	44	0			No matches found	No matches found	No matches found	No matches found	Multiple matches found	DDA for preferred ion	1.14429e+07
(2R,3S,4S,5S,6R)-2-({7-hydroxy-4-[(3Z)-5-hydroxy-3-methylpent-3-en-1-yl]-4a,8,8-trimethyl-3-methylidene-decahydronaphthalen-2-yl}oxy)-6-(hydroxymethyl)oxane-3,4,5-triol	C26 H44 O8	No match	Invalid mass	No match	No match	45394.8	506.288	4.671	6.30404e+07	36	4	79.6	9	No matches found	No matches found	No matches found	No matches found	Multiple matches found	DDA for preferred ion	6.30404e+07
Amoritin	C31 H38 O6	No match	No results	Partial match	Full match	3.78	506.269	4.702	2.78377e+06	55	0			Multiple matches found	No matches found	No matches found	No matches found	No matches found	DDA for preferred ion	2.78377e+06
Pregaliellalactone F	C11 H16 O3	Full match	No results	Partial match	Full match	-1.03	196.11	4.707	1.20123e+07	44	0			No matches found	No matches found	No matches found	No matches found	Multiple matches found	DDA for preferred ion	1.20123e+07
(2S,3R)-2-Amino-1,3-dodecanediol	C12 H27 N O2	Full match	No results	Full match	No results	0.14	217.204	5.357	2.34725e+06	5	0			No matches found	No matches found	No matches found	No matches found	No matches found	DDA for preferred ion	2.34725e+06
Cuminaldehyde	C10 H12 O	Full match	Full match	Not the top hit	Partial match	-0.46	148.089	5.42	2.21168e+06	37	4	65.8	43.5	No matches found	No matches found	Multiple matches found	Single match found	No matches found	DDA for preferred ion	2.21168e+06
(2S,3R)-2-Amino-1,3-dodecanediol	C12 H27 N O2	Full match	No results	Full match	No results	0.14	217.204	5.45	4.1989e+06	5	0			No matches found	No matches found	No matches found	No matches found	No matches found	DDA for preferred ion	4.1989e+06
2-Dibutylaminoethanol	C10 H23 N O	Full match	No results	Full match	Full match	-0.35	173.178	5.46	2.3205e+06	3	0			No matches found	No matches found	No matches found	Single match found	No matches found	DDA for preferred ion	2.3205e+06
Triglycidyl isocyanurate	C12 H15 N3 O6	No match	Invalid mass	No match	No match	13.36	297.1	5.617	1.14079e+07	212	12	38.6	58.7	No matches found	No matches found	No matches found	No matches found	Multiple matches found	DDA for preferred ion	1.14079e+07
2-(Hydroxymethyl)-2-(octylamino)-1,3-propanediol	C12 H27 N O3	Full match	No results	Full match	No results	0.28	233.199	5.624	1.76448e+06	1	0			No matches found	No matches found	No matches found	No matches found	No matches found	No MS2	1.76448e+06
Skeletocutin I	C28 H42 O9	No match	No results	No match	Full match	1.76	522.284	5.71	2.27661e+06	59	0			No matches found	No matches found	No matches found	No matches found	Multiple matches found	DDA for preferred ion	2.27661e+06
3,5,7-Trimethyl-1-azatricyclo[3.3.1.1~3,7~]decane-2,8-diol	C12 H21 N O2	Full match	No results	Full match	No results	0.07	211.157	5.857	1.91378e+06	22	0			No matches found	No matches found	No matches found	No matches found	No matches found	DDA for preferred ion	1.91378e+06
(9aR,9bS)-9a-Hydroxy-6,9-dimethyl-3-methylene-3,3a,4,5,9a,9b-hexahydroazuleno[4,5-b]furan-2,7-dione	C15 H16 O4	Full match	Full match	Partial match	Partial match	-0.41	260.105	5.879	2.42356e+06	127	2	36.5	58.1	No matches found	No matches found	Single match found	No matches found	Multiple matches found	DDA for preferred ion	2.42356e+06
	C21 H37 F4 N O9	Full match	No results	No match	No results	1.67	523.241	5.887	2.76336e+06	32	0			No matches found	No matches found	No matches found	No matches found	No matches found	DDA for preferred ion	2.76336e+06
NP-018660	C13 H22 O3	No match	Invalid mass	No match	No match	-79637.6	208.146	6.128	8.92907e+06	50	4	41.4	59.6	No matches found	No matches found	No matches found	Single match found	Multiple matches found	DDA for preferred ion	8.92907e+06
(6Z,9S)-3,4-trans-9-hydroxy-3-methyldodec-6-en-4-olide	C13 H22 O3	Full match	No results	Partial match	Full match	-0.62	226.157	6.129	3.45759e+06	45	0			No matches found	No matches found	No matches found	No matches found	Multiple matches found	No MS2	3.45759e+06
12-Oxo phytodienoic acid	C18 H28 O3	No match	Invalid mass	No match	No match	-61636.9	274.193	6.208	5.24728e+06	62	16	87.6	80.7	No matches found	No matches found	No matches found	No matches found	Multiple matches found	DDA for preferred ion	5.24728e+06
9S,13R-12-Oxophytodienoic acid	C18 H28 O3	Full match	Full match	Full match	Partial match	0.62	292.204	6.208	3.59731e+06	49	15	92.1	83.1	No matches found	No matches found	Multiple matches found	Single match found	Multiple matches found	DDA for preferred ion	3.59731e+06
(11E,15Z)-9,10,13-trihydroxyoctadeca-11,15-dienoic acid	C18 H32 O5	No match	Invalid mass	No match	No results	66973.5	350.207	6.208	2.25023e+06	1	26	99.6	10	No matches found	No matches found	No matches found	No matches found	No matches found	DDA for preferred ion	2.25023e+06
NP-017152	C13 H23 N O2	Full match	Full match	Partial match	Partial match	-0.59	225.173	6.334	2.31655e+07	22	3	35.2	6.8	No matches found	No matches found	No matches found	Single match found	Multiple matches found	DDA for preferred ion	2.31655e+07
Oxprenolol	C15 H23 N O3	No match	Invalid mass	No match	No results	-82907	243.184	6.334	5.09311e+06	9	3	69	8.5	No matches found	No matches found	No matches found	No matches found	No matches found	DDA for preferred ion	5.09311e+06
		No results	No results	No results	No results		225.167	6.336	1.63987e+06	0	0			No matches found	No matches found	No matches found	No matches found	No matches found	DDA for preferred ion	1.63987e+06
diethylmaleate	C8 H12 O4	Full match	No results	Full match	Full match	0.48	172.074	6.355	1.99664e+06	38	0			No matches found	No matches found	No matches found	Multiple matches found	Multiple matches found	DDA for preferred ion	1.99664e+06
(4S,5S,8S,10R)-4,5,8-trihydroxy-10-methyl-3,4,5,8,9,10-hexahydro-2H-oxecin-2-one	C10 H16 O5	Not the top hit	Full match	Partial match	Not the top hit	-0.12	216.1	6.355	1.96312e+06	10	1	41	59.4	No matches found	No matches found	No matches found	No matches found	Multiple matches found	DDA for preferred ion	1.96312e+06
Imidazosagatriazinone	C17 H20 N4 O2	No match	Invalid mass	No match	No results	-70431.2	290.173	6.356	1.71293e+07	130	2	96.6	9.8	No matches found	No matches found	No matches found	No matches found	No matches found	DDA for preferred ion	1.71293e+07
Penicillinolide A	C14 H24 O5	Not the top hit	No results	Partial match	Full match	0.66	272.163	6.356	1.57275e+06	158	0			No matches found	No matches found	No matches found	No matches found	Multiple matches found	DDA for preferred ion	1.57275e+06
	C16 H33 N O6	Full match	No results	No match	No results	0.56	335.231	6.359	3.92458e+06	33	0			No matches found	No matches found	No matches found	No matches found	No matches found	DDA for preferred ion	3.92458e+06
Dipropylene glycol dimethyl ether	C8 H18 O3	Full match	Full match	Partial match	Partial match	0.3	162.126	6.359	2.98657e+06	5	1	64.6	8.2	No matches found	No matches found	No matches found	Multiple matches found	No matches found	DDA for preferred ion	2.98657e+06
ML-236C	C18 H26 O3	Full match	No results	Full match	Full match	-0.13	290.188	6.458	3.1435e+06	65	0			No matches found	No matches found	No matches found	Single match found	Multiple matches found	DDA for preferred ion	3.1435e+06
5-Hydroxy-7-(hydroxymethyl)-2-methyl-2-(5-oxotetrahydro-2-furanyl)-2,3-dihydro-4H-chromen-4-one	C15 H16 O6	Full match	Full match	Partial match	Full match	0.09	292.095	6.462	8.80163e+06	148	4	33.8	38.3	No matches found	No matches found	No matches found	No matches found	Multiple matches found	DDA for preferred ion	8.80163e+06
Coumarin	C9 H6 O2	Full match	Full match	Not the top hit	Partial match	-0.34	146.037	6.462	2.36047e+06	11	1	32.6	41.3	No matches found	No matches found	Multiple matches found	Single match found	Multiple matches found	DDA for preferred ion	2.36047e+06
3-(1′-Hydroxypentyl)phenol	C11 H16 O2	Full match	No results	Partial match	Full match	-0.46	180.115	6.49	4.7868e+06	48	0			No matches found	No matches found	No matches found	Single match found	Multiple matches found	DDA for preferred ion	4.7868e+06
N-acetyl-3,5,11,18-tetrahydroxyoctadecyl-2-amine	C20 H41 N O5	Not the top hit	No results	Partial match	Full match	0.67	375.299	6.493	2.97442e+06	4	0			No matches found	No matches found	No matches found	No matches found	Single match found	DDA for preferred ion	2.97442e+06
Sedanolide	C12 H18 O2	Full match	Full match	Full match	Partial match	0.15	194.131	6.495	8.5049e+06	60	2	43.9	60.3	No matches found	No matches found	No matches found	No matches found	Multiple matches found	DDA for preferred ion	8.5049e+06
Ectocarpene	C11 H16	Full match	No results	Full match	No results	-0.62	148.125	6.496	3.54696e+06	7	0			No matches found	No matches found	No matches found	No matches found	No matches found	DDA for preferred ion	3.54696e+06
(12Z)-9,10,11-trihydroxyoctadec-12-enoic acid	C18 H34 O5	No match	Invalid mass	No match	No results	66563.9	352.223	6.498	2.08401e+07	2	27	99.7	10	No matches found	No matches found	No matches found	No matches found	No matches found	DDA for preferred ion	2.08401e+07
NP-004036	C12 H22 O4	No match	Invalid mass	No match	No match	-78255.1	212.141	6.498	3.00408e+06	37	3	92.3	83.2	No matches found	No matches found	Multiple matches found	No matches found	Multiple matches found	DDA for preferred ion	3.00408e+06
GRH	C14 H24 N8 O4	No match	Invalid mass	No match	No results	12.05	368.196	6.499	3.40435e+06	13	1	40.3	7	No matches found	No matches found	No matches found	No matches found	No matches found	DDA for preferred ion	3.40435e+06
Palmitoleic Acid	C16 H30 O2	No match	Invalid mass	No match	No match	86476.3	276.209	6.5	1.02659e+07	56	2	65.8	66.7	No matches found	No matches found	Single match found	Single match found	Single match found	DDA for preferred ion	1.02659e+07
(±)13-HpODE	C18 H32 O4	No match	Invalid mass	No match	No match	-57682.9	294.22	6.501	1.46989e+07	51	12	96.1	89.3	No matches found	No matches found	Multiple matches found	No matches found	Multiple matches found	DDA for preferred ion	1.46989e+07
Diapolic acid B	C9 H16 O3	Full match	No results	Partial match	Full match	-0.11	172.11	6.504	2.88808e+06	24	0			No matches found	No matches found	Single match found	No matches found	Multiple matches found	DDA for preferred ion	2.88808e+06
NP-013663	C18 H34 O5	No match	Invalid mass	No match	No results	51557.5	347.267	6.506	3.5973e+06	33	4	93.2	83.5	No matches found	No matches found	No matches found	No matches found	No matches found	DDA for preferred ion	3.5973e+06
Dendryphiellic acid A	C9 H14 O2	Full match	No results	Partial match	Full match	-0.08	154.099	6.507	3.3752e+06	40	0			No matches found	No matches found	No matches found	No matches found	Multiple matches found	DDA for preferred ion	3.3752e+06
1,3,6-Octatriene	C8 H12	Full match	No results	Partial match	Full match	-0.88	108.094	6.526	2.63327e+06	8	0			No matches found	No matches found	No matches found	Single match found	Single match found	DDA for preferred ion	2.63327e+06
OPEO	C16 H26 O2	Full match	Full match	Partial match	Not the top hit	0.32	250.193	6.535	2.01888e+07	48	3	61.2	65.4	No matches found	No matches found	Multiple matches found	Multiple matches found	Single match found	DDA for preferred ion	2.01888e+07
NP-001596	C16 H30 O4	No match	Invalid mass	No match	No results	76803.1	308.197	6.535	1.66575e+07	20	18	99.6	10	No matches found	No matches found	No matches found	No matches found	No matches found	DDA for preferred ion	1.66575e+07
NP-001596	C16 H30 O4	No match	Invalid mass	No match	No match	-62927.2	268.204	6.535	4.76022e+06	34	2	79.4	49.7	No matches found	No matches found	No matches found	No matches found	Multiple matches found	DDA for preferred ion	4.76022e+06
Decanophenone	C16 H24 O	Full match	Full match	Partial match	No results	0.44	232.183	6.535	4.70999e+06	17	1	49.5	61.9	No matches found	No matches found	No matches found	No matches found	No matches found	DDA for preferred ion	4.70999e+06
(4aR,9aS)-7-Ethynyl-4a,9a-dimethyl-1-methylene-2,3,4,4a,5,6,9,9a-octahydro-1H-benzo[7]annulene	C16 H22	Full match	No results	Full match	No results	-0.28	214.172	6.535	3.228e+06	2	0			No matches found	No matches found	No matches found	No matches found	No matches found	DDA for preferred ion	3.228e+06
Escitalopram	C20 H21 F N2 O	No match	Invalid mass	No match	No results	19.91	324.17	6.535	1.67675e+06	186	5	43.8	7.2	No matches found	No matches found	No matches found	No matches found	No matches found	DDA for preferred ion	1.67675e+06
tetranor-12(R)-HETE	C16 H26 O3	No match	Invalid mass	No match	No match	-67660.6	248.178	6.541	2.20222e+06	58	3	63.1	65.9	No matches found	No matches found	No matches found	Multiple matches found	Multiple matches found	DDA for preferred ion	2.20222e+06
5-Hydroxy-7-(hydroxymethyl)-2-methyl-2-(5-oxotetrahydro-2-furanyl)-2,3-dihydro-4H-chromen-4-one	C15 H16 O6	Full match	Full match	Partial match	Full match	0.09	292.095	6.587	4.10804e+06	148	3	34	38.4	No matches found	No matches found	No matches found	No matches found	Multiple matches found	DDA for preferred ion	4.10804e+06
NP-020214	C16 H32 O4	No match	Invalid mass	No match	No results	76265.7	310.212	6.636	1.15442e+06	4	2	90.3	9.5	No matches found	No matches found	No matches found	No matches found	No matches found	DDA for preferred ion	1.15442e+06
Wortmannine F	C16 H28 O2	Full match	No results	Partial match	Full match	-0.68	252.209	6.637	4.13339e+06	34	0			No matches found	No matches found	No matches found	No matches found	Multiple matches found	DDA for preferred ion	4.13339e+06
2,6-di-tert-butyl-4-ethylphenol	C16 H26 O	Full match	No results	Partial match	Full match	-0.58	234.198	6.637	2.75161e+06	22	0			No matches found	No matches found	No matches found	Single match found	No matches found	DDA for preferred ion	2.75161e+06
NP-020214	C16 H32 O4	No match	Invalid mass	No match	No match	-62487.1	270.219	6.637	1.41238e+06	12	1	88.5	73.4	No matches found	No matches found	No matches found	No matches found	Multiple matches found	DDA for preferred ion	1.41238e+06
1-[(2-Hydroxyethyl)amino]-2-dodecanol	C14 H31 N O2	Full match	No results	Full match	No results	-0.08	245.235	6.663	2.00592e+07	2	0			No matches found	No matches found	No matches found	No matches found	No matches found	DDA for preferred ion	2.00592e+07
LAURIMINODIPROPIONIC ACID	C18 H35 N O4	Full match	No results	Full match	No results	-0.09	329.257	6.667	2.13422e+06	16	0			No matches found	No matches found	No matches found	No matches found	No matches found	DDA for preferred ion	2.13422e+06
6-cyclohexyl-5-(cyclohexylimino)-4-thia-6-azaspiro[2.4]heptan-7-one	C17 H26 N2 O S	No match	Invalid mass	No match	No match	-71780.7	284.199	6.671	1.12149e+07	74	2	76.2	8.8	No matches found	No matches found	No matches found	Single match found	Multiple matches found	DDA for preferred ion	1.12149e+07
NP-008563	C16 H28 O4	No match	Invalid mass	No match	No match	-63373	266.188	6.673	1.28061e+07	61	4	64.1	66.2	No matches found	No matches found	Multiple matches found	No matches found	Multiple matches found	DDA for preferred ion	1.28061e+07
Tetranor-12R-HETE	C16 H26 O3	No match	Invalid mass	No match	No match	-67660.6	248.178	6.674	3.19054e+06	58	9	62.2	46.6	No matches found	No matches found	No matches found	Multiple matches found	Multiple matches found	DDA for preferred ion	3.19054e+06
N,N-Dimethyldecylamine N-oxide	C12 H27 N O	Full match	Full match	Full match	No results	0.21	201.209	6.692	8.61427e+06	5	5	80.6	50.4	No matches found	No matches found	No matches found	No matches found	No matches found	DDA for preferred ion	8.61427e+06
2,2,6,6-Tetramethyl-1-piperidinol (TEMPO)	C9 H19 N O	Full match	Full match	Full match	Partial match	-0.65	157.147	6.745	5.01209e+06	30	2	83.5	9.2	No matches found	No matches found	No matches found	Multiple matches found	No matches found	DDA for preferred ion	5.01209e+06
NP-015468	C20 H16 O4	Full match	Full match	Partial match	Partial match	-0.14	320.105	6.787	1.74027e+06	50	7	60	8	Multiple matches found	No matches found	No matches found	No matches found	Multiple matches found	DDA for preferred ion	1.74027e+06
tetradecaphytosphingosine	C14 H31 N O3	Full match	No results	Full match	No results	-0.93	261.23	6.789	8.58207e+06	3	0			No matches found	No matches found	No matches found	No matches found	No matches found	DDA for preferred ion	8.58207e+06
NP-001596	C16 H30 O4	Full match	Full match	Partial match	Partial match	0.66	286.215	6.829	8.5878e+06	48	14	96.8	9.8	No matches found	No matches found	Single match found	Multiple matches found	Multiple matches found	DDA for preferred ion	8.5878e+06
Simplifungin	C18 H37 N O4	Full match	No results	Not the top hit	Full match	-0.35	331.272	6.831	2.60547e+06	15	0			No matches found	No matches found	No matches found	No matches found	Single match found	DDA for preferred ion	2.60547e+06
NP-001596	C16 H30 O4	No match	Invalid mass	No match	No match	-62927.2	268.204	6.832	1.59534e+07	34	4	87.1	71.5	No matches found	No matches found	No matches found	No matches found	Multiple matches found	DDA for preferred ion	1.59534e+07
OPEO	C16 H26 O2	Full match	Full match	Partial match	Not the top hit	0.32	250.193	6.832	7.44706e+06	48	1	69.6	67.8	No matches found	No matches found	Multiple matches found	Multiple matches found	Single match found	DDA for preferred ion	7.44706e+06
Cerinolactone	C18 H26 O3	Full match	No results	Partial match	Full match	-0.13	290.188	6.839	3.35096e+06	65	0			No matches found	No matches found	No matches found	Single match found	Multiple matches found	DDA for preferred ion	3.35096e+06
(2Z)-2-Hepten-1-ylbenzene	C13 H18	Full match	No results	Full match	No results	-0.85	174.141	6.873	6.47962e+06	8	0			No matches found	No matches found	No matches found	No matches found	No matches found	DDA for preferred ion	6.47962e+06
beta-Ionone	C13 H20 O	Full match	No results	Partial match	Full match	-0.24	192.151	6.876	7.08596e+06	40	0			No matches found	No matches found	Single match found	No matches found	No matches found	DDA for preferred ion	7.08596e+06
Arthpyrone E	C24 H33 N O8	Full match	No results	No match	Full match	-1.42	463.22	6.876	5.44469e+06	88	0			No matches found	No matches found	No matches found	No matches found	Multiple matches found	DDA for preferred ion	5.44469e+06
2-[1-(2H-1,3-benzodioxol-5-yl)propan-2-yl]-6-methoxy-4-(prop-2-en-1-yl)phenol	C20 H22 O4	Full match	Full match	Partial match	Partial match	0.48	326.152	6.876	3.31125e+06	131	2	39.5	39.3	Multiple matches found	No matches found	No matches found	Single match found	Multiple matches found	DDA for preferred ion	3.31125e+06
	C32 H34 N3 P	Full match	No results	No match	No results	4.8	491.251	6.876	1.96817e+06	7	0			No matches found	No matches found	No matches found	No matches found	No matches found	DDA for preferred ion	1.96817e+06
Cyprodenate	C13 H25 N O2	Full match	No results	Full match	No results	-0.17	227.188	6.878	3.75752e+07	8	0			No matches found	No matches found	No matches found	No matches found	No matches found	DDA for preferred ion	3.75752e+07
NP-018660	C13 H22 O3	No match	Invalid mass	No match	No match	-79637.6	208.146	7.027	3.89531e+06	50	2	42.4	59.8	No matches found	No matches found	No matches found	Single match found	Multiple matches found	DDA for preferred ion	3.89531e+06
	C16 H27 F3 O2	Full match	No results	No match	No results	1.16	308.197	7.046	912003	20	0			No matches found	No matches found	No matches found	No matches found	No matches found	No MS2	912003
(1R,4aS)-7-(2-Hydroxypropan-2-yl)-1,4a-dimethyl-9-oxo-3,4,10,10a-tetrahydro-2H-phenanthrene-1-carboxylic acid	C20 H26 O4	No match	Invalid mass	No match	No match	-7.63	330.181	7.049	1.96129e+06	99	4	82.5	9.1	No matches found	No matches found	No matches found	No matches found	Multiple matches found	DDA for preferred ion	1.96129e+06
ML-236C	C18 H26 O3	Full match	No results	Full match	Full match	-0.13	290.188	7.05	1.86002e+07	65	0			No matches found	No matches found	No matches found	Single match found	Multiple matches found	DDA for preferred ion	1.86002e+07
19-Norandrostenedione	C18 H24 O2	Full match	Full match	Not the top hit	Partial match	0.11	272.178	7.051	2.55519e+06	70	4	42.1	39.7	No matches found	Single match found	Multiple matches found	No matches found	Multiple matches found	DDA for preferred ion	2.55519e+06
Dichotomocej B	C14 H25 N O2	Full match	No results	Partial match	Full match	-0.71	239.188	7.062	5.853e+06	14	0			No matches found	No matches found	No matches found	No matches found	Multiple matches found	DDA for preferred ion	5.853e+06
	C10 H23 F N8 O	Full match	No results	No match	No results	-3.65	290.197	7.064	736006	4	0			No matches found	No matches found	No matches found	No matches found	No matches found	DDA for preferred ion	736006
Allahabadolactone B	C18 H26 O3	Full match	No results	Partial match	Full match	-0.13	290.188	7.151	7.04691e+06	65	0			No matches found	No matches found	No matches found	Single match found	Multiple matches found	DDA for preferred ion	7.04691e+06
Diimidotricarbonic acid	C3 H4 N2 O5	No results	No results	Full match	No results	3.74	148.013	7.174	4.01947e+06	1	0			No matches found	No matches found	No matches found	No matches found	No matches found	DDA for preferred ion	4.01947e+06
Phthalic anhydride	C8 H4 O3	Full match	No results	Full match	Full match	-1.58	148.016	7.175	6.79612e+07	1	0			No matches found	No matches found	No matches found	Single match found	No matches found	DDA for preferred ion	6.79612e+07
2-aminoethyl (allylamino)methanedithioate hydrochloride	C6 H12 N2 S2	No match	Invalid mass	No match	No match	17.08	176.047	7.175	1.12364e+07	38	9	67.3	47.6	No matches found	No matches found	Multiple matches found	No matches found	Multiple matches found	DDA for preferred ion	1.12364e+07
2-keto-4-methylthiobutyricacid(KMBA)	C5 H8 O3 S	Full match	No results	Partial match	Full match	-0.23	148.019	7.175	2.88144e+06	2	0			No matches found	No matches found	Single match found	No matches found	No matches found	DDA for preferred ion	2.88144e+06
Thromboxane B2	C20 H34 O6	No match	Invalid mass	No match	No results	45988.1	387.262	7.249	2.236e+06	30	2	32.3	6.6	No matches found	No matches found	No matches found	No matches found	No matches found	DDA for preferred ion	2.236e+06
NP-005397	C18 H30 O6	No match	Invalid mass	No match	No results	49756.3	359.231	7.249	1.77288e+06	78	1	67.3	47.6	No matches found	No matches found	No matches found	No matches found	No matches found	DDA for preferred ion	1.77288e+06
	C13 H25 F N6 O5	Full match	No results	No match	No results	-2.9	364.186	7.25	2.46993e+06	15	0			No matches found	No matches found	No matches found	No matches found	No matches found	DDA for preferred ion	2.46993e+06
	C16 H29 F N2 O3 S2	Full match	No results	No match	No results	0.06	380.16	7.25	2.21773e+06	84	0			No matches found	No matches found	No matches found	No matches found	No matches found	DDA for preferred ion	2.21773e+06
NP-020014	C15 H26 O3	No match	Invalid mass	No match	No match	86488.1	276.172	7.308	1.90107e+06	56	4	57.8	45.8	No matches found	No matches found	No matches found	Single match found	Multiple matches found	DDA for preferred ion	1.90107e+06
NP-018660	C13 H22 O3	No match	Invalid mass	No match	No match	-79637.6	208.146	7.317	5.11367e+07	50	10	49.5	61.9	No matches found	No matches found	No matches found	Single match found	Multiple matches found	DDA for preferred ion	5.11367e+07
		No results	No results	No results	No results		208.151	7.317	4.13493e+06	0	0			No matches found	No matches found	No matches found	No matches found	No matches found	DDA for preferred ion	4.13493e+06
NP-016596	C19 H30 O8	No results	Invalid mass	No match	No match	-18.54	386.187	7.411	2.37955e+06	184	12	40.5	7	No matches found	No matches found	No matches found	No matches found	Single match found	DDA for preferred ion	2.37955e+06
SMTP-11L	C28 H39 N O6	Full match	No results	Partial match	Full match	-0.27	485.278	7.411	1.94147e+06	7	0			No matches found	No matches found	No matches found	No matches found	Multiple matches found	DDA for preferred ion	1.94147e+06
Acetophenone	C8 H8 O	Full match	Full match	Partial match	Partial match	-0.21	120.057	7.412	3.31983e+06	13	1	30.7	40.9	No matches found	No matches found	Single match found	Multiple matches found	No matches found	DDA for preferred ion	3.31983e+06
Macrosphelide K	C18 H26 O9	No match	No results	No match	Full match	3.61	386.159	7.414	5.51935e+06	9	0			No matches found	No matches found	No matches found	No matches found	Single match found	DDA for preferred ion	5.51935e+06
Myxopyronin A	C23 H31 N O6	Full match	No results	Partial match	Full match	0.58	417.215	7.414	3.59437e+06	201	0			No matches found	No matches found	No matches found	No matches found	Multiple matches found	DDA for preferred ion	3.59437e+06
3-{(4R,7S,8aS)-7-[(Isopropylcarbamoyl)amino]-1-oxooctahydropyrrolo[1,2-a]pyrazin-4-yl}-N-(4-methoxybenzyl)propanamide	C22 H33 N5 O4	No results	Invalid mass	No match	No match	-19.18	431.245	7.414	3.45951e+06	113	3	37.5	6.9	No matches found	No matches found	No matches found	No matches found	Single match found	DDA for preferred ion	3.45951e+06
Alternatain A	C14 H16 O6	Not the top hit	No results	Partial match	Full match	-0.24	280.095	7.414	3.41695e+06	29	0			No matches found	No matches found	No matches found	Single match found	Multiple matches found	DDA for preferred ion	3.41695e+06
Bis(methylbenzylidene)sorbitol	C22 H26 O6	Full match	Full match	Partial match	Partial match	-1	386.173	7.415	9.84089e+07	329	8	98	9.9	Multiple matches found	No matches found	No matches found	Single match found	Multiple matches found	DDA for preferred ion	9.84089e+07
F1839-B	C24 H33 N O6	Not the top hit	No results	Partial match	Full match	-0.49	431.231	7.415	5.52056e+07	149	0			No matches found	No matches found	No matches found	No matches found	Multiple matches found	DDA for preferred ion	5.52056e+07
Styrene	C8 H8	Full match	No results	Full match	Full match	-0.65	104.063	7.415	1.69357e+07	6	0			No matches found	No matches found	No matches found	Single match found	Single match found	DDA for preferred ion	1.69357e+07
Aculin B	C26 H35 N O7	Not the top hit	No results	No match	Full match	-0.91	473.241	7.415	7.32017e+06	140	0			No matches found	No matches found	No matches found	No matches found	Multiple matches found	DDA for preferred ion	7.32017e+06
NP-005519	C14 H18 O5	Full match	Full match	Partial match	Partial match	-0.07	266.115	7.415	5.1024e+06	52	5	38	39	No matches found	No matches found	No matches found	No matches found	Multiple matches found	DDA for preferred ion	5.1024e+06
NP-006531	C22 H26 O6	No match	Invalid mass	No match	No match	44091	403.2	7.415	3.88404e+06	250	1	30.7	6.5	No matches found	No matches found	No matches found	No matches found	Multiple matches found	DDA for preferred ion	3.88404e+06
	C12 H34 N9 O4 P S	Full match	No results	No match	No results	-4.77	431.217	7.415	3.78755e+06	55	0			No matches found	No matches found	No matches found	No matches found	No matches found	DDA for preferred ion	3.78755e+06
	C22 H28 F5 N5	Full match	No results	No match	No results	1.4	457.227	7.415	3.52042e+06	117	0			No matches found	No matches found	No matches found	No matches found	No matches found	DDA for preferred ion	3.52042e+06
Fluocinolone	C21 H26 F2 O6	Full match	No results	Full match	No results	-1.16	412.169	7.415	3.13365e+06	24	0			No matches found	No matches found	No matches found	No matches found	No matches found	DDA for preferred ion	3.13365e+06
NP-006531	C22 H26 O6	No match	Invalid mass	No match	No match	-46638.8	368.162	7.415	2.88395e+06	193	2	34.2	6.7	Multiple matches found	No matches found	No matches found	No matches found	Multiple matches found	DDA for preferred ion	2.88395e+06
Estriol	C18 H24 O3	Full match	Full match	Full match	Partial match	-0.25	288.172	7.418	4.96378e+06	75	3	69.2	67.7	No matches found	No matches found	Multiple matches found	No matches found	Multiple matches found	DDA for preferred ion	4.96378e+06
2,3-Dinor-11β-prostaglandin F2α	C18 H30 O5	No match	Invalid mass	No match	No results	67387.3	348.192	7.462	3.2642e+06	17	7	48.3	7.4	No matches found	No matches found	No matches found	No matches found	No matches found	DDA for preferred ion	3.2642e+06
N,N'-(2-Hydroxy-1,3-propanediyl)dioctanamide	C19 H38 N2 O3	Full match	No results	Full match	No results	1.29	342.289	7.462	2.44429e+06	6	0			No matches found	No matches found	No matches found	No matches found	No matches found	No MS2	2.44429e+06
TKK	C16 H33 N5 O5	No match	Invalid mass	No match	No results	11.19	375.252	7.537	5.42966e+06	34	2	35.8	41.8	No matches found	No matches found	No matches found	No matches found	No matches found	DDA for preferred ion	5.42966e+06
Apigenin 7- (2",6"-di-p-coumarylglucoside)	C39 H32 O14	Full match	No results	Partial match	Full match	-0.2	724.179	7.537	3.27605e+06	12	0			Multiple matches found	No matches found	No matches found	No matches found	No matches found	DDA for preferred ion	3.27605e+06
9S,13R-12-Oxophytodienoic acid	C18 H28 O3	Full match	Full match	Full match	Partial match	0.62	292.204	7.538	4.2636e+06	49	5	80.5	75.5	No matches found	No matches found	Multiple matches found	Single match found	Multiple matches found	DDA for preferred ion	4.2636e+06
Andrographolide	C20 H30 O5	No match	Invalid mass	No match	No results	-51434.1	332.197	7.538	2.27146e+06	79	11	93.3	80.5	No matches found	No matches found	No matches found	No matches found	No matches found	DDA for preferred ion	2.27146e+06
N-(6-Amino-1-isobutyl-2,4-dioxo-1,2,3,4-tetrahydro-5-pyrimidinyl)-3-cyclohexyl-N-isobutylpropanamide	C21 H36 N4 O3	Full match	No results	Full match	No results	0.14	392.279	7.539	3.44731e+06	10	0			No matches found	No matches found	No matches found	No matches found	No matches found	DDA for preferred ion	3.44731e+06
	C13 H25 F N8 O4 P2	Full match	No results	No match	No results	4.17	438.148	7.54	3.32891e+06	134	0			No matches found	No matches found	No matches found	No matches found	No matches found	DDA for preferred ion	3.32891e+06
12-oxo Phytodienoic Acid	C18 H28 O3	No match	Invalid mass	No match	No match	-61636.9	274.193	7.54	2.57908e+06	62	8	79.2	74.6	No matches found	No matches found	No matches found	No matches found	Multiple matches found	DDA for preferred ion	2.57908e+06
6-O-[(2E)-3-(4-Hydroxyphenyl)-2-propenoyl]-1-O-[(2E)-3-phenyl-2-propenoyl]-β-D-glucopyranose	C24 H24 O9	No match	Invalid mass	No match	No match	-39484	438.132	7.544	3.9435e+07	30	4	77.8	8.9	Single match found	No matches found	No matches found	No matches found	Multiple matches found	DDA for preferred ion	3.9435e+07
2-Hydroxycinnamic acid (o-coumaric acid)	C9 H8 O3	No match	Invalid mass	No match	No match	-109789	146.037	7.547	1.58191e+07	11	10	50	44.4	No matches found	No matches found	Multiple matches found	Single match found	Multiple matches found	DDA for preferred ion	1.58191e+07
N,N-Bis(2-hydroxyethyl)dodecanamide	C16 H33 N O3	Full match	No results	Full match	Full match	-0.3	287.246	7.548	1.57027e+06	8	0			No matches found	No matches found	No matches found	Single match found	No matches found	No MS2	1.57027e+06
	C28 H62 F N5 O8	Full match	No results	No results	No results	-2.98	615.456	7.572	5.88782e+06	0	0			No matches found	No matches found	No matches found	No matches found	No matches found	No MS2	5.88782e+06
2-Hydroxycinnamic acid	C9 H8 O3	No match	Invalid mass	No match	No match	-109789	146.037	7.634	2.08582e+06	11	4	43.1	43.2	No matches found	No matches found	Multiple matches found	Single match found	Multiple matches found	DDA for preferred ion	2.08582e+06
Pranazepide	C26 H19 F N4 O2	No results	No results	Full match	No results	-3.59	438.148	7.693	993763	134	0			No matches found	No matches found	No matches found	No matches found	No matches found	DDA for preferred ion	993763
6-O-[(2E)-3-(4-Hydroxyphenyl)-2-propenoyl]-1-O-[(2E)-3-phenyl-2-propenoyl]-β-D-glucopyranose	C24 H24 O9	No match	Invalid mass	No match	No match	-39484	438.132	7.694	1.35641e+07	30	2	77.5	8.9	Single match found	No matches found	No matches found	No matches found	Multiple matches found	DDA for preferred ion	1.35641e+07
2-Hydroxycinnamic acid	C9 H8 O3	No match	Invalid mass	No match	No match	-109789	146.037	7.694	4.89492e+06	11	6	46.8	43.8	No matches found	No matches found	Multiple matches found	Single match found	Multiple matches found	DDA for preferred ion	4.89492e+06
Apigenin 7- (2",6"-di-p-coumarylglucoside)	C39 H32 O14	No match	No results	Partial match	Full match	-0.2	724.179	7.694	1.56647e+06	13	0			Multiple matches found	No matches found	No matches found	No matches found	No matches found	DDA for preferred ion	1.56647e+06
12-Oxo phytodienoic acid	C18 H28 O3	Full match	Full match	Full match	Partial match	0.62	292.204	7.73	1.94845e+06	49	10	72.6	51.6	No matches found	No matches found	Multiple matches found	Single match found	Multiple matches found	DDA for preferred ion	1.94845e+06
Palmitic Acid	C16 H32 O2	No match	Invalid mass	No match	No match	66447.7	273.267	7.763	1.00922e+08	6	3	84.3	52.6	No matches found	No matches found	No matches found	Single match found	No matches found	DDA for preferred ion	1.00922e+08
		No results	No results	No results	No results		273.275	7.766	8.32324e+06	0	0			No matches found	No matches found	No matches found	No matches found	No matches found	DDA for preferred ion	8.32324e+06
	C15 H34 N2 O2	Full match	No results	No results	No results	0.05	274.262	7.766	1.42003e+06	0	0			No matches found	No matches found	No matches found	No matches found	No matches found	DDA for preferred ion	1.42003e+06
N-[(2S,3S)-3-Fluoro-1-hydroxy-2-dodecanyl]hexanamide	C18 H36 F N O2	Full match	No results	Full match	No results	1.79	317.274	7.767	1.85721e+06	1	0			No matches found	No matches found	No matches found	No matches found	No matches found	DDA for preferred ion	1.85721e+06
		No results	No results	No results	No results		229.247	7.804	2.1513e+06	0	0			No matches found	No matches found	No matches found	No matches found	No matches found	DDA for preferred ion	2.1513e+06
Lauryldimethylamine oxide	C14 H31 N O	Full match	No results	Full match	No results	0.43	229.241	7.805	4.08025e+07	7	0			No matches found	No matches found	No matches found	No matches found	No matches found	DDA for preferred ion	4.08025e+07
		No results	No results	No results	No results		229.234	7.806	1.6979e+06	0	0			No matches found	No matches found	No matches found	No matches found	No matches found	DDA for preferred ion	1.6979e+06
NP-018660	C13 H22 O3	No match	Invalid mass	No match	No match	-79637.6	208.146	7.817	9.7358e+06	50	2	45.6	60.8	No matches found	No matches found	No matches found	Single match found	Multiple matches found	DDA for preferred ion	9.7358e+06
2-Amino-1,3,4-octadecanetriol	C18 H39 N O3	Full match	Full match	Full match	Full match	0.17	317.293	7.825	2.01984e+06	3	1	67.5	8.4	No matches found	No matches found	Single match found	No matches found	Single match found	DDA for preferred ion	2.01984e+06
C16 phytosphingosine	C16 H35 N O3	Full match	No results	Full match	No results	0.25	289.262	7.862	1.83798e+07	2	0			No matches found	No matches found	No matches found	No matches found	No matches found	DDA for preferred ion	1.83798e+07
		No results	No results	No results	No results		289.271	7.865	1.05218e+06	0	0			No matches found	No matches found	No matches found	No matches found	No matches found	DDA for preferred ion	1.05218e+06
	C18 H29 F3 O4	Full match	No results	No match	No results	0.35	366.202	7.905	5.0806e+06	3	0			No matches found	No matches found	No matches found	No matches found	No matches found	DDA for preferred ion	5.0806e+06
	C15 H30 N2 O7 S	Full match	No results	No match	No results	-4.2	382.176	7.908	3.01271e+06	103	0			No matches found	No matches found	No matches found	No matches found	No matches found	DDA for preferred ion	3.01271e+06
(9Z)-Tetradecenoicacid	C14 H26 O2	Full match	No results	Partial match	Full match	-0.86	226.193	7.95	2.65757e+06	32	0			No matches found	No matches found	Single match found	No matches found	Single match found	No MS2	2.65757e+06
Laurixamine	C15 H33 N O	Full match	No results	Full match	No results	0.3	243.256	7.957	1.48955e+06	5	0			No matches found	No matches found	No matches found	No matches found	No matches found	No MS2	1.48955e+06
3-hydroxy-N-(1-hydroxy-4-methylpentan-2-yl)-5-oxo-6-phenylhexanamide	C18 H27 N O4	Full match	Full match	Partial match	Partial match	0.6	321.194	7.974	1.93926e+06	82	1	50.7	41.1	No matches found	No matches found	No matches found	No matches found	Single match found	DDA for preferred ion	1.93926e+06
1785113	C16 H33 N O2	Full match	No results	Full match	No results	0.29	271.251	7.977	3.76485e+06	14	0			No matches found	No matches found	No matches found	No matches found	No matches found	No MS2	3.76485e+06
Aspergilone A	C26 H26 O3	No match	No results	No match	Full match	-4.68	386.186	8.025	5.73356e+06	4	0			No matches found	No matches found	No matches found	No matches found	Single match found	DDA for preferred ion	5.73356e+06
Ketocytochalasin	C28 H33 N O3	No match	No results	Partial match	Full match	-4.16	431.244	8.026	2.33939e+06	112	0			No matches found	No matches found	No matches found	No matches found	Single match found	DDA for preferred ion	2.33939e+06
Cerinolactone	C18 H26 O3	Full match	No results	Partial match	Full match	-0.13	290.188	8.034	2.50273e+06	65	0			No matches found	No matches found	No matches found	Single match found	Multiple matches found	DDA for preferred ion	2.50273e+06
Bis(4-ethylbenzylidene)sorbitol	C24 H30 O6	Full match	Full match	Partial match	Partial match	-0.36	414.204	8.068	1.396e+06	277	2	98.3	9.9	No matches found	Single match found	No matches found	Single match found	Multiple matches found	DDA for preferred ion	1.396e+06
NP-008993	C18 H34 O4	No match	Invalid mass	No match	No results	69952.1	336.228	8.071	1.51931e+06	1	16	100	10	No matches found	No matches found	No matches found	No matches found	No matches found	DDA for preferred ion	1.51931e+06
Acremeremophilane K	C17 H26 O3	Full match	No results	Partial match	Full match	0.42	278.188	8.077	2.46827e+06	50	0			No matches found	No matches found	No matches found	Single match found	Multiple matches found	DDA for preferred ion	2.46827e+06
α-Linolenoyl ethanolamide	C20 H35 N O2	Not the top hit	Full match	Full match	No results	-0.21	321.267	8.097	2.42136e+06	25	2	48.8	61.7	No matches found	No matches found	No matches found	No matches found	No matches found	DDA for preferred ion	2.42136e+06
Hexadecanamide;Palmiticamide	C16 H33 N O	Full match	No results	Partial match	Full match	0.59	255.256	8.113	6.128e+06	5	0			No matches found	No matches found	Single match found	Single match found	No matches found	No MS2	6.128e+06
α-Linolenoyl ethanolamide	C20 H35 N O2	Full match	Full match	Full match	No results	-0.21	321.267	8.21	2.20309e+06	25	2	50.9	62.4	No matches found	No matches found	No matches found	No matches found	No matches found	DDA for preferred ion	2.20309e+06
Medelamine B	C15 H33 N	Full match	No results	Partial match	Full match	-0.3	227.261	8.267	1.83769e+06	1	0			No matches found	No matches found	No matches found	No matches found	Single match found	No MS2	1.83769e+06
Lauryldimethylamine oxide	C14 H31 N O	Full match	No results	Full match	No results	0.43	229.241	8.287	2.99089e+06	7	0			No matches found	No matches found	No matches found	No matches found	No matches found	No MS2	2.99089e+06
tetranor-12(R)-HETE	C16 H26 O3	No match	Invalid mass	No match	No match	-67661.1	248.178	8.383	1.43988e+06	58	3	69.5	67.8	No matches found	No matches found	No matches found	Multiple matches found	Multiple matches found	DDA for preferred ion	1.43988e+06
	C21 H31 F O S	Full match	No results	No match	No results	-1.74	350.207	8.425	1.15566e+06	1	0			No matches found	No matches found	No matches found	No matches found	No matches found	DDA for preferred ion	1.15566e+06
(5ξ,9ξ,16ξ)-17-Hydroxykauran-19-oic acid	C20 H32 O3	No match	Invalid mass	No match	No match	53169.6	337.262	8.468	1.52863e+06	32	2	33	38.2	No matches found	No matches found	No matches found	No matches found	Single match found	DDA for preferred ion	1.52863e+06
(11E,15Z)-9,10,13-trihydroxyoctadeca-11,15-dienoic acid	C18 H32 O5	No match	Invalid mass	No match	No results	66973.5	350.207	8.502	2.52667e+06	3	12	72.4	8.6	No matches found	No matches found	No matches found	No matches found	No matches found	DDA for preferred ion	2.52667e+06
Shogaol	C17 H24 O3	Full match	Full match	Full match	Partial match	-0.37	276.172	8.555	1.91798e+06	56	9	84.5	9.2	No matches found	No matches found	No matches found	Single match found	Multiple matches found	DDA for preferred ion	1.91798e+06
4,4-Difluoropregn-5-ene-3,20-dione	C21 H28 F2 O2	Full match	No results	Not the top hit	No results	4.62	350.207	8.602	2.71473e+06	3	0			No matches found	No matches found	No matches found	No matches found	No matches found	DDA for preferred ion	2.71473e+06
	C18 H29 F3 O3	Full match	No results	No match	No results	1.35	350.207	8.725	993639	1	0			No matches found	No matches found	No matches found	No matches found	No matches found	DDA for preferred ion	993639
Sphinganine;2-Amion-1_3-octadecanediol	C18 H39 N O2	Full match	No results	Partial match	Full match	0.41	301.298	8.831	3.70028e+06	11	0			No matches found	No matches found	Single match found	No matches found	No matches found	No MS2	3.70028e+06
NP-004713	C15 H24 O2	No match	Invalid mass	No match	No match	-76258.3	218.167	8.868	2.82529e+06	92	5	80.8	75.7	No matches found	No matches found	Multiple matches found	No matches found	Multiple matches found	DDA for preferred ion	2.82529e+06
4-hydroxy-6-[2-(2-methyl-1,2,4a,5,6,7,8,8a-octahydronaphthalen-1-yl)ethyl]oxan-2-one	C18 H28 O3	Full match	Full match	Partial match	Partial match	0.6	292.204	8.869	5.72936e+06	49	16	93	9.7	No matches found	No matches found	Multiple matches found	Single match found	Multiple matches found	DDA for preferred ion	5.72936e+06
12-oxo Phytodienoic Acid	C18 H28 O3	No match	Invalid mass	No match	No match	-61636.9	274.193	8.876	3.20236e+06	62	12	84.9	78.7	No matches found	No matches found	No matches found	No matches found	Multiple matches found	DDA for preferred ion	3.20236e+06
(2R,3S,4R,2'R,3'S,4'R)-5,5'-(Cyclododecylimino)di(1,2,3,4-pentanetetrol) (non-preferred name)	C22 H45 N O8	Full match	No results	Full match	No results	-0.04	451.315	8.948	7.21197e+06	3	0			No matches found	No matches found	No matches found	No matches found	No matches found	DDA for preferred ion	7.21197e+06
3,5-di-tert-butyl-4-hydroxybenzaldehyde	C15 H22 O2	Full match	No results	Full match	Full match	0.63	234.162	8.956	3.20011e+06	221	0			No matches found	No matches found	No matches found	Multiple matches found	Multiple matches found	No MS2	3.20011e+06
12-oxo Phytodienoic Acid	C18 H28 O3	No match	Invalid mass	No match	No match	-61636.9	274.193	8.985	4.126e+06	62	12	87	71.4	No matches found	No matches found	No matches found	No matches found	Multiple matches found	DDA for preferred ion	4.126e+06
9S,13R-12-Oxophytodienoic acid	C18 H28 O3	Full match	Full match	Full match	Partial match	0.62	292.204	8.987	3.00289e+06	49	15	86.7	80	No matches found	No matches found	Multiple matches found	Single match found	Multiple matches found	DDA for preferred ion	3.00289e+06
	C39 H31 F2 N5 O2	Full match	No results	No match	No results	1.1	639.245	9.051	2.16679e+06	11	0			No matches found	No matches found	No matches found	No matches found	No matches found	DDA for preferred ion	2.16679e+06
	C33 H59 F O3 S	Full match	No results	No match	No results	1.36	554.418	9.159	2.87244e+06	1	0			No matches found	No matches found	No matches found	No matches found	No matches found	DDA for preferred ion	2.87244e+06
NP-020521	C18 H32 O3	No match	Invalid mass	No match	No match	-60798.5	278.224	9.162	1.77924e+07	78	25	98.3	98.4	No matches found	No matches found	Multiple matches found	Multiple matches found	Multiple matches found	DDA for preferred ion	1.77924e+07
	C32 H60 O7	Full match	No results	No results	No results	-0.8	556.433	9.259	1.55929e+06	0	0			No matches found	No matches found	No matches found	No matches found	No matches found	DDA for preferred ion	1.55929e+06
	C32 H62 O7	Full match	No results	No match	No results	-0.3	558.449	9.317	1.94551e+06	2	0			No matches found	No matches found	No matches found	No matches found	No matches found	DDA for preferred ion	1.94551e+06
	C18 H38 F N O	Full match	No results	No match	No results	-4.21	303.292	9.323	5.28859e+06	1	0			No matches found	No matches found	No matches found	No matches found	No matches found	No MS2	5.28859e+06
	C12 H27 F3 N4 S	Full match	No results	No match	No results	-0.7	316.191	9.337	1.59868e+06	231	0			No matches found	No matches found	No matches found	No matches found	No matches found	DDA for preferred ion	1.59868e+06
Cafestol	C20 H28 O3	No match	Invalid mass	No match	No match	-69525	294.22	9.341	3.52592e+07	51	66	92.9	9.6	No matches found	No matches found	Multiple matches found	No matches found	Multiple matches found	DDA for preferred ion	3.52592e+07
7-[(2E)-3,7-Dimethyl-2,6-octadien-1-yl]-6-(methoxyamino)-9-methyl-9H-purin-7-ium	C17 H26 N5 O	No results	No results	Invalid mass	No results	-6.09	316.212	9.341	1.53774e+06	8	0			No matches found	No matches found	No matches found	No matches found	No matches found	DDA for preferred ion	1.53774e+06
Palmitoleic Acid	C16 H30 O2	No match	Invalid mass	No match	No match	86476.3	276.209	9.342	3.22087e+07	56	4	67.8	67.3	No matches found	No matches found	Single match found	Single match found	Single match found	DDA for preferred ion	3.22087e+07
Bicyclohexyliden-2-one	C12 H18 O	Full match	No results	Partial match	Full match	-0.98	178.136	9.342	1.15499e+07	25	0			No matches found	No matches found	No matches found	Multiple matches found	Multiple matches found	DDA for preferred ion	1.15499e+07
N-{[(2R,4S,5R)-5-Vinyl-1-azabicyclo[2.2.2]oct-2-yl]methyl}cyclohexanecarboxamide	C17 H28 N2 O	No results	Invalid mass	No match	No results	-13.67	276.216	9.342	2.87897e+06	1	4	50.8	44.6	No matches found	No matches found	No matches found	No matches found	No matches found	DDA for preferred ion	2.87897e+06
NP-014287	C18 H32 O3	No match	Invalid mass	No match	No match	-60798.5	278.224	9.345	4.55713e+06	78	5	96.2	90	No matches found	No matches found	Multiple matches found	Multiple matches found	Multiple matches found	DDA for preferred ion	4.55713e+06
N-Methyldioctylamine	C17 H37 N	Full match	Full match	Full match	Partial match	-1	255.292	9.398	1.40532e+07	1	1	82.6	9.1	No matches found	No matches found	No matches found	Single match found	No matches found	DDA for preferred ion	1.40532e+07
Palmitoleic Acid	C16 H30 O2	No match	Invalid mass	No match	No match	86476.3	276.209	9.405	1.07749e+07	56	5	67	67	No matches found	No matches found	Single match found	Single match found	Single match found	DDA for preferred ion	1.07749e+07
(±)13-HpODE	C18 H32 O4	No match	Invalid mass	No match	No match	-57682.9	294.22	9.406	9.66e+06	51	18	94.2	83.9	No matches found	No matches found	Multiple matches found	No matches found	Multiple matches found	DDA for preferred ion	9.66e+06
	C37 H36 F2 N3 O2 P	Full match	No results	No match	No results	-2.04	623.25	9.431	3.91281e+06	1	0			No matches found	No matches found	No matches found	No matches found	No matches found	DDA for preferred ion	3.91281e+06
Palmitoleic Acid	C16 H30 O2	No match	Invalid mass	No match	No match	86476.3	276.209	9.489	4.7789e+07	56	5	63.2	65.9	No matches found	No matches found	Single match found	Single match found	Single match found	DDA for preferred ion	4.7789e+07
Cafestol	C20 H28 O3	No match	Invalid mass	No match	No match	-69525	294.22	9.489	4.19897e+07	51	66	93	9.6	No matches found	No matches found	Multiple matches found	No matches found	Multiple matches found	DDA for preferred ion	4.19897e+07
N-{[(2R,4S,5R)-5-Vinyl-1-azabicyclo[2.2.2]oct-2-yl]methyl}cyclohexanecarboxamide	C17 H28 N2 O	No results	Invalid mass	No match	No results	-13.67	276.216	9.489	4.26152e+06	1	5	44.5	43.4	No matches found	No matches found	No matches found	No matches found	No matches found	DDA for preferred ion	4.26152e+06
	C12 H31 Cl N6	Full match	No results	No match	No results	-1.58	294.229	9.489	2.10973e+06	32	0			No matches found	No matches found	No matches found	No matches found	No matches found	DDA for preferred ion	2.10973e+06
	C32 H62 O7	Full match	No results	No match	No results	-0.41	558.449	9.498	1.60277e+06	3	0			No matches found	No matches found	No matches found	No matches found	No matches found	DDA for preferred ion	1.60277e+06
	C25 H49 N5 O3	Full match	No results	No match	No results	-4	467.382	9.515	3.06264e+06	1	0			No matches found	No matches found	No matches found	No matches found	No matches found	No MS2	3.06264e+06
Phthalic anhydride	C8 H4 O3	Full match	No results	Full match	Full match	-1.58	148.016	9.53	3.10155e+06	1	0			No matches found	No matches found	No matches found	Single match found	No matches found	DDA for preferred ion	3.10155e+06
	C24 H54 F N5 O5	Full match	No results	No results	No results	-4.1	511.409	9.557	3.37941e+06	0	0			No matches found	No matches found	No matches found	No matches found	No matches found	No MS2	3.37941e+06
Phthalic anhydride	C8 H4 O3	Full match	No results	Full match	Full match	-1.58	148.016	9.598	1.24107e+07	1	0			No matches found	No matches found	No matches found	Single match found	No matches found	DDA for preferred ion	1.24107e+07
	C12 H31 Cl N6	Full match	No results	No results	No results	-2.4	294.229	9.615	3.31909e+06	0	0			No matches found	No matches found	No matches found	No matches found	No matches found	DDA for preferred ion	3.31909e+06
Cafestol	C20 H28 O3	No match	Invalid mass	No match	No match	-69525.1	294.22	9.618	5.48198e+07	51	66	93	9.6	No matches found	No matches found	Multiple matches found	No matches found	Multiple matches found	DDA for preferred ion	5.48198e+07
[(1E,4E)-5,9-Dimethyl-1,4,8-decatrien-1-yl]benzene	C18 H24	Full match	No results	Full match	No results	0.22	240.188	9.618	1.38865e+06	3	0			No matches found	No matches found	No matches found	No matches found	No matches found	DDA for preferred ion	1.38865e+06
Palmitoleic Acid	C16 H30 O2	No match	Invalid mass	No match	No match	86476.3	276.209	9.619	5.44997e+07	56	5	67.4	67.2	No matches found	No matches found	Single match found	Single match found	Single match found	DDA for preferred ion	5.44997e+07
N-{[(2R,4S,5R)-5-Vinyl-1-azabicyclo[2.2.2]oct-2-yl]methyl}cyclohexanecarboxamide	C17 H28 N2 O	No results	Invalid mass	No match	No results	-13.67	276.216	9.619	4.48154e+06	1	5	49.8	44.4	No matches found	No matches found	No matches found	No matches found	No matches found	DDA for preferred ion	4.48154e+06
Palmitoleic Acid	C16 H30 O2	No results	Invalid mass	No results	No results	86450.3	276.202	9.619	2.60705e+06	0	5	67.4	67.2	No matches found	No matches found	No matches found	No matches found	No matches found	DDA for preferred ion	2.60705e+06
Shogaol	C17 H24 O3	Full match	Full match	Full match	Partial match	-0.59	276.172	9.658	3.29704e+06	56	17	76.9	8.8	No matches found	No matches found	No matches found	Single match found	Multiple matches found	DDA for preferred ion	3.29704e+06
9-{3-[(4-Cyclohexylbutanoyl)amino]-3-deoxy-beta-D-xylofuranosyl}-9H-purin-6-amine	C20 H30 N6 O4	Full match	No results	Full match	No results	0.61	418.233	9.66	1.87538e+06	13	0			No matches found	No matches found	No matches found	No matches found	No matches found	DDA for preferred ion	1.87538e+06
Oleoyl ethanolamide	C20 H39 N O2	No match	Invalid mass	No match	No results	-55365.3	307.288	9.696	2.81665e+06	6	2	39.7	42.5	No matches found	No matches found	No matches found	No matches found	No matches found	DDA for preferred ion	2.81665e+06
(Z)-N-hydroxy-11-methyldodec-2-enamide	C13 H25 N O2	Full match	No results	Full match	No results	-0.36	227.188	9.696	2.74208e+06	8	0			No matches found	No matches found	No matches found	No matches found	No matches found	DDA for preferred ion	2.74208e+06
Pinolenic acid ethyl ester	C20 H34 O2	No match	Invalid mass	No match	No results	55595.5	323.282	9.698	986871	8	6	74.7	71.3	No matches found	No matches found	No matches found	No matches found	No matches found	DDA for preferred ion	986871
3-(1′-Hydroxypentyl)phenol	C11 H16 O2	Full match	No results	Partial match	Full match	-0.72	180.115	9.722	1.0794e+06	48	0			No matches found	No matches found	No matches found	Single match found	Multiple matches found	DDA for preferred ion	1.0794e+06
(Z)-N-hydroxy-11-methyldodec-2-enamide	C13 H25 N O2	Full match	No results	Full match	No results	-0.36	227.188	9.748	3.82349e+06	8	0			No matches found	No matches found	No matches found	No matches found	No matches found	DDA for preferred ion	3.82349e+06
	C20 H36 F3 N O	Full match	No results	No match	No results	1.15	363.275	9.828	7.86046e+06	1	0			No matches found	No matches found	No matches found	No matches found	No matches found	DDA for preferred ion	7.86046e+06
Celiprolol	C20 H33 N3 O4	No match	Invalid mass	No match	No match	5.1	379.249	9.828	2.46134e+06	4	1	54.4	41.7	No matches found	No matches found	Single match found	No matches found	No matches found	DDA for preferred ion	2.46134e+06
N-(9-oxodecyl)acetamide	C12 H23 N O2	Full match	Full match	Partial match	No results	-0.26	213.173	9.828	1.27764e+06	21	1	51.6	44.7	No matches found	No matches found	No matches found	No matches found	No matches found	DDA for preferred ion	1.27764e+06
Oleoyl ethanolamide	C20 H39 N O2	No match	Invalid mass	No match	No results	-55365.3	307.288	9.829	4.2532e+06	6	1	46.8	43.8	No matches found	No matches found	No matches found	No matches found	No matches found	DDA for preferred ion	4.2532e+06
Microdiplactone	C11 H21 N O2	Full match	No results	Partial match	Full match	-0.46	199.157	9.829	2.95683e+06	31	0			No matches found	No matches found	No matches found	No matches found	Single match found	DDA for preferred ion	2.95683e+06
Pinolenic acid ethyl ester	C20 H34 O2	No match	Invalid mass	No match	No results	55595.5	323.282	9.833	3.20784e+06	8	12	75.1	55.1	No matches found	No matches found	No matches found	No matches found	No matches found	DDA for preferred ion	3.20784e+06
N-[(2S,3R,4E)-1-{[(5R)-5-Ethyl-alpha-L-arabinopyranosyl]oxy}-3-hydroxy-4-octadecen-2-yl]heptanamide	C32 H61 N O7	Full match	No results	Full match	No results	0.01	571.445	9.916	1.3773e+06	3	0			No matches found	No matches found	No matches found	No matches found	No matches found	DDA for preferred ion	1.3773e+06
Defumarylhygrolidin	C34 H56 O7	No match	No results	Partial match	Full match	-4.29	576.4	9.917	1.36095e+06	10	0			No matches found	No matches found	No matches found	No matches found	Multiple matches found	DDA for preferred ion	1.36095e+06
5-(but-3-en-1-yl)-3-propyldihydrofuran-2(3H)-one	C11 H18 O2	Full match	No results	Partial match	Full match	-0.6	182.131	9.921	1.84726e+06	31	0			No matches found	No matches found	No matches found	No matches found	Multiple matches found	DDA for preferred ion	1.84726e+06
	C20 H36 F3 N O	Full match	No results	No match	No results	1.15	363.275	9.922	8.0634e+06	1	0			No matches found	No matches found	No matches found	No matches found	No matches found	DDA for preferred ion	8.0634e+06
Microdiplactone	C11 H21 N O2	Full match	No results	Partial match	Full match	-0.46	199.157	9.922	3.45997e+06	31	0			No matches found	No matches found	No matches found	No matches found	Single match found	DDA for preferred ion	3.45997e+06
D-erythro-Sphingosine1-phosphate	C18 H38 N O5 P	Not the top hit	No results	Partial match	Full match	0.74	379.249	9.922	2.20556e+06	4	0			No matches found	No matches found	Single match found	No matches found	No matches found	DDA for preferred ion	2.20556e+06
Jasmone	C11 H16 O	Full match	Full match	Not the top hit	Partial match	-0.44	164.12	9.922	1.09672e+06	39	2	42.2	59.8	No matches found	No matches found	No matches found	Multiple matches found	No matches found	DDA for preferred ion	1.09672e+06
Oleoyl ethanolamide	C20 H39 N O2	No match	Invalid mass	No match	No results	-55365.3	307.288	9.924	3.0552e+06	6	1	45.8	43.7	No matches found	No matches found	No matches found	No matches found	No matches found	DDA for preferred ion	3.0552e+06
Pinolenic acid ethyl ester	C20 H34 O2	No match	Invalid mass	No match	No results	55595.5	323.282	9.928	5.43333e+06	8	12	80	61.8	No matches found	No matches found	No matches found	No matches found	No matches found	DDA for preferred ion	5.43333e+06
NP-014287	C18 H32 O3	No match	Invalid mass	No match	No results	74204.3	318.217	9.962	2.18832e+06	32	16	95.9	9.8	No matches found	No matches found	No matches found	No matches found	No matches found	DDA for preferred ion	2.18832e+06
Pinolenic acid	C18 H30 O2	Full match	Full match	Not the top hit	Partial match	-0.27	278.224	9.963	2.97256e+06	78	15	82.8	77.2	No matches found	No matches found	Multiple matches found	Multiple matches found	Multiple matches found	DDA for preferred ion	2.97256e+06
4-[(2-Methyl-4-quinolinyl)methoxy]-N-({2,4,6-trioxo-5-[4-(3-pyridinylcarbonyl)-1-piperazinyl]hexahydro-5-pyrimidinyl}methyl)benzamide	C33 H31 N7 O6	No results	No results	Full match	No results	1.85	621.235	10.008	1.48491e+06	24	0			No matches found	No matches found	No matches found	No matches found	No matches found	DDA for preferred ion	1.48491e+06
Ouabain	C29 H44 O12	No results	Invalid mass	No match	No results	64965.3	622.241	10.008	1.44895e+06	35	1	53.8	7.7	No matches found	No matches found	No matches found	No matches found	No matches found	DDA for preferred ion	1.44895e+06
	C38 H35 F2 N O5	Full match	No results	No match	No results	1.78	623.249	10.017	3.02233e+06	19	0			No matches found	No matches found	No matches found	No matches found	No matches found	No MS2	3.02233e+06
	C27 H50 F2 N3 O P	Full match	No results	No match	No results	2.13	501.367	10.078	4.10099e+06	1	0			No matches found	No matches found	No matches found	No matches found	No matches found	No MS2	4.10099e+06
Butyl (2-cyclohexyl-5-{[2-(diethylamino)ethyl](ethyl)amino}-1H-benzimidazol-6-yl)carbamate	C26 H43 N5 O2	Full match	No results	Not the top hit	No results	-2.57	457.341	10.083	5.96637e+06	2	0			No matches found	No matches found	No matches found	No matches found	No matches found	No MS2	5.96637e+06
(2E,4E)-11-Methoxy-3,7,11-trimethyl-2,4-dodecadienamide	C16 H29 N O2	Full match	No results	Full match	No results	0.25	267.22	10.132	2.55988e+06	15	0			No matches found	No matches found	No matches found	No matches found	No matches found	DDA for preferred ion	2.55988e+06
(5alpha,7alpha)-3-Amino-20-methylpregnan-7-ol	C22 H39 N O	Full match	No results	Full match	No results	-0.05	333.303	10.134	5.91662e+06	7	0			No matches found	No matches found	No matches found	No matches found	No matches found	DDA for preferred ion	5.91662e+06
[FA(20:3)]N-(8Z_11Z_14Z-eicosatrienoyl)-ethanolamine	C22 H39 N O2	Full match	No results	Partial match	Full match	0.27	349.298	10.136	4.20484e+06	17	0			No matches found	No matches found	Single match found	No matches found	No matches found	No MS2	4.20484e+06
	C22 H38 F3 N O	Full match	No results	No match	No results	-0.25	389.29	10.14	5.00704e+06	2	0			No matches found	No matches found	No matches found	No matches found	No matches found	DDA for preferred ion	5.00704e+06
Linoleoyl ethanolamide	C20 H37 N O2	Full match	Full match	Full match	No results	-0.29	323.282	10.163	2.66841e+06	8	5	98.1	9.9	No matches found	No matches found	No matches found	No matches found	No matches found	DDA for preferred ion	2.66841e+06
C12E3	C18 H38 O4	Full match	No results	Full match	No results	0.82	318.277	10.201	5.23304e+06	4	0			No matches found	No matches found	No matches found	No matches found	No matches found	DDA for preferred ion	5.23304e+06
(2E,4E)-N-Isobutyl-2,4-octadecadienamide	C22 H41 N O	Full match	No results	Full match	No results	0.51	335.319	10.258	2.63473e+06	5	0			No matches found	No matches found	No matches found	No matches found	No matches found	No MS2	2.63473e+06
	C19 H39 O4 P3	Full match	No results	No match	No results	3.27	424.208	10.266	1.93209e+06	24	0			No matches found	No matches found	No matches found	No matches found	No matches found	No MS2	1.93209e+06
Piptamine	C23 H41 N	Full match	No results	Full match	Full match	0.37	331.324	10.304	2.71324e+06	1	0			No matches found	No matches found	No matches found	No matches found	Single match found	No MS2	2.71324e+06
	C19 H30 F2	Full match	No results	No match	No results	4.21	296.233	10.317	2.06666e+06	1	0			No matches found	No matches found	No matches found	No matches found	No matches found	No MS2	2.06666e+06
Ouabain	C29 H44 O12	No match	Invalid mass	No match	No results	64966.4	622.242	10.322	2.84887e+06	33	2	48	7.4	No matches found	No matches found	No matches found	No matches found	No matches found	DDA for preferred ion	2.84887e+06
4-[(2-Methyl-4-quinolinyl)methoxy]-N-({2,4,6-trioxo-5-[4-(3-pyridinylcarbonyl)-1-piperazinyl]hexahydro-5-pyrimidinyl}methyl)benzamide	C33 H31 N7 O6	No results	No results	Full match	No results	1.85	621.235	10.323	1.72873e+06	24	0			No matches found	No matches found	No matches found	No matches found	No matches found	DDA for preferred ion	1.72873e+06
	C30 H59 N O P2	Full match	No results	No results	No results	3.15	511.409	10.418	2.33615e+06	0	0			No matches found	No matches found	No matches found	No matches found	No matches found	No MS2	2.33615e+06
	C28 H53 N O2 S	Full match	No results	No match	No results	4.21	467.382	10.428	3.3145e+06	1	0			No matches found	No matches found	No matches found	No matches found	No matches found	No MS2	3.3145e+06
Ricinoleic acid methyl ester	C19 H36 O3	No match	Invalid mass	No match	No results	19249	318.277	10.431	3.56034e+06	4	1	38.9	42.4	No matches found	No matches found	No matches found	No matches found	No matches found	DDA for preferred ion	3.56034e+06
	C20 H46 F N5 O3	Full match	No results	No match	No results	-4.74	423.356	10.435	3.99603e+06	1	0			No matches found	No matches found	No matches found	No matches found	No matches found	No MS2	3.99603e+06
3,6,9,12-Tetraoxatetracosan-1-ol	C20 H42 O5	Full match	No results	Not the top hit	Full match	1.47	362.304	10.436	3.81682e+06	2	0			No matches found	No matches found	No matches found	Single match found	No matches found	DDA for preferred ion	3.81682e+06
Cyprodenate	C13 H25 N O2	Full match	No results	Full match	No results	-0.36	227.188	10.449	2.22806e+06	8	0			No matches found	No matches found	No matches found	No matches found	No matches found	No MS2	2.22806e+06
Pyrrolidine, 1-oleoyl-	C22 H41 N O	Full match	No results	Full match	No results	0.51	335.319	10.475	1.77738e+07	5	0			No matches found	No matches found	No matches found	No matches found	No matches found	DDA for preferred ion	1.77738e+07
Phenol, dioctyl-	C22 H38 O	Not the top hit	No results	Partial match	Full match	0.63	318.292	10.475	3.56441e+06	5	0			No matches found	No matches found	No matches found	Single match found	No matches found	DDA for preferred ion	3.56441e+06
		No results	No results	No results	No results		375.311	10.476	5.44772e+06	0	0			No matches found	No matches found	No matches found	No matches found	No matches found	DDA for preferred ion	5.44772e+06
	C19 H41 N	Full match	No results	No results	No results	0.65	283.324	10.476	3.94676e+06	0	0			No matches found	No matches found	No matches found	No matches found	No matches found	No MS2	3.94676e+06
N,S-Ditrityl-L-cysteine	C41 H35 N O2 S	No results	No results	Full match	No results	1.76	605.24	10.52	6.62782e+06	21	0			No matches found	No matches found	No matches found	No matches found	No matches found	DDA for preferred ion	6.62782e+06
	C31 H38 F3 N2 O5 P	Full match	No results	No match	No results	-0.48	606.247	10.525	8.78289e+06	2	0			No matches found	No matches found	No matches found	No matches found	No matches found	DDA for preferred ion	8.78289e+06
(4S,5S)-4-Methyl-5-undecyl-1,3-oxazolidin-2-one	C15 H29 N O2	Full match	No results	Full match	No results	-0.45	255.22	10.546	5.41497e+06	9	0			No matches found	No matches found	No matches found	No matches found	No matches found	DDA for preferred ion	5.41497e+06
Pyrrolidine, 1-oleoyl-	C22 H41 N O	Full match	No results	Full match	No results	0.51	335.319	10.588	6.67539e+07	5	0			No matches found	No matches found	No matches found	No matches found	No matches found	DDA for preferred ion	6.67539e+07
Phenol, dioctyl-	C22 H38 O	Not the top hit	No results	Partial match	Full match	0.63	318.292	10.588	1.17484e+07	5	0			No matches found	No matches found	No matches found	Single match found	No matches found	DDA for preferred ion	1.17484e+07
N-{2-[2-(2-Aminoethoxy)ethoxy]ethyl}octadecanamide	C24 H50 N2 O3	Full match	No results	Full match	No results	0.11	414.382	10.59	4.69964e+06	1	0			No matches found	No matches found	No matches found	No matches found	No matches found	DDA for preferred ion	4.69964e+06
(+)-N-Methylconiine	C9 H19 N	Full match	No results	Not the top hit	Full match	-0.53	141.152	10.59	1.91096e+06	11	0			No matches found	No matches found	Single match found	No matches found	No matches found	No MS2	1.91096e+06
Gymnamide	C14 H25 N O	Full match	No results	Not the top hit	Full match	-0.11	223.194	10.59	1.4941e+06	18	0			No matches found	No matches found	No matches found	No matches found	Single match found	No MS2	1.4941e+06
2-methyl-2-bornene	C11 H18	Full match	No results	Partial match	Full match	-0.88	150.141	10.59	1.33463e+06	9	0			No matches found	No matches found	No matches found	No matches found	Multiple matches found	No MS2	1.33463e+06
1,4-Cyclohexadiene	C6 H8	Full match	No results	Full match	No results	-1.13	80.0625	10.59	1.26211e+06	3	0			No matches found	No matches found	No matches found	No matches found	No matches found	No MS2	1.26211e+06
Semiplenamide F	C22 H43 N O3	Full match	No results	Not the top hit	Full match	-0.43	369.324	10.591	9.51186e+07	10	0			No matches found	No matches found	No matches found	No matches found	Single match found	DDA for preferred ion	9.51186e+07
Cyprodenate	C13 H25 N O2	Full match	No results	Full match	No results	-0.36	227.188	10.591	9.4681e+07	8	0			No matches found	No matches found	No matches found	No matches found	No matches found	DDA for preferred ion	9.4681e+07
(9Z)-1-(4-Morpholinyl)-9-octadecen-1-one	C22 H41 N O2	Full match	No results	Not the top hit	Full match	-0.31	351.314	10.591	5.19744e+07	3	0			No matches found	No matches found	No matches found	Single match found	No matches found	DDA for preferred ion	5.19744e+07
1-Oxa-4-azacyclohexadecan-16-one	C14 H27 N O2	Full match	No results	Full match	No results	-0.19	241.204	10.591	2.55399e+07	5	0			No matches found	No matches found	No matches found	No matches found	No matches found	DDA for preferred ion	2.55399e+07
beta-Ionone	C13 H20 O	Full match	No results	Partial match	Full match	-0.24	192.151	10.591	2.31933e+07	40	0			No matches found	No matches found	Single match found	No matches found	No matches found	DDA for preferred ion	2.31933e+07
1-HEPTENYLBENZENE	C13 H18	Full match	No results	Full match	No results	-0.85	174.141	10.591	2.25828e+07	8	0			No matches found	No matches found	No matches found	No matches found	No matches found	DDA for preferred ion	2.25828e+07
10-Methyldodec-3-en-4-olide	C13 H22 O2	Full match	No results	Partial match	Full match	-0.46	210.162	10.591	1.41703e+07	28	0			No matches found	No matches found	No matches found	No matches found	Multiple matches found	DDA for preferred ion	1.41703e+07
		No results	No results	No results	No results		227.184	10.591	6.66666e+06	0	0			No matches found	No matches found	No matches found	No matches found	No matches found	DDA for preferred ion	6.66666e+06
Dihomo-γ-linolenic acid ethyl ester	C22 H38 O2	No results	Full match	Partial match	Full match	-0.25	334.287	10.591	6.38438e+06	11	2	93.1	83.5	No matches found	No matches found	Single match found	No matches found	No matches found	DDA for preferred ion	6.38438e+06
		No results	No results	No results	No results		227.194	10.591	6.13648e+06	0	0			No matches found	No matches found	No matches found	No matches found	No matches found	DDA for preferred ion	6.13648e+06
Ethyl 4-{[11-(trimethylsilyl)undecyl]amino}benzoate	C23 H41 N O2 Si	No results	No results	Full match	No results	4	391.292	10.591	5.57865e+06	3	0			No matches found	No matches found	No matches found	No matches found	No matches found	DDA for preferred ion	5.57865e+06
1-Dodecyl-5-hexyl-1H-imidazol-2-amine	C21 H41 N3	No results	No results	Full match	No results	0.6	335.33	10.591	4.27882e+06	2	0			No matches found	No matches found	No matches found	No matches found	No matches found	DDA for preferred ion	4.27882e+06
1,3,6-Octatriene	C8 H12	Full match	No results	Partial match	Full match	-0.88	108.094	10.591	3.81641e+06	8	0			No matches found	No matches found	No matches found	Single match found	Single match found	DDA for preferred ion	3.81641e+06
(5S,S)-5-methyl-3-(6-methyloctyl)furan-2(5H)-one	C14 H24 O2	Full match	No results	Partial match	Full match	-0.41	224.178	10.591	3.75091e+06	25	0			No matches found	No matches found	No matches found	No matches found	Multiple matches found	DDA for preferred ion	3.75091e+06
2-Methyl-1-hexen-3-yne	C7 H10	Full match	No results	Full match	No results	-1.23	94.0781	10.591	3.5964e+06	3	0			No matches found	No matches found	No matches found	No matches found	No matches found	DDA for preferred ion	3.5964e+06
(5alpha,7alpha)-3-Amino-20-methylpregnan-7-ol	C22 H39 N O	No results	No results	Full match	No results	0.32	333.303	10.591	3.33857e+06	7	0			No matches found	No matches found	No matches found	No matches found	No matches found	DDA for preferred ion	3.33857e+06
4,10-dihydroxy-10-methyl-dodecan-4-olide	C13 H24 O3	Full match	No results	Partial match	Full match	-0.45	228.172	10.591	3.19871e+06	20	0			No matches found	No matches found	No matches found	No matches found	Multiple matches found	DDA for preferred ion	3.19871e+06
	C50 H84 F2 O	Full match	No results	No results	No results	-0.83	738.648	10.591	2.75204e+06	0	0			No matches found	No matches found	No matches found	No matches found	No matches found	No MS2	2.75204e+06
	C16 H38 F N5 O	Full match	No results	No results	No results	3.3	335.307	10.591	2.59184e+06	0	0			No matches found	No matches found	No matches found	No matches found	No matches found	DDA for preferred ion	2.59184e+06
Mesitylethylene	C11 H14	Full match	No results	Partial match	Full match	-0.56	146.109	10.591	2.08549e+06	5	0			No matches found	No matches found	No matches found	Single match found	No matches found	No MS2	2.08549e+06
UNII:6S7S02945H	C13 H25 N O	Full match	No results	Full match	No results	-0.26	211.194	10.591	1.52946e+06	7	0			No matches found	No matches found	No matches found	No matches found	No matches found	No MS2	1.52946e+06
		No results	No results	No results	No results		192.156	10.591	1.50805e+06	0	0			No matches found	No matches found	No matches found	No matches found	No matches found	DDA for preferred ion	1.50805e+06
3,4-dimethylbenzyl alcohol	C9 H12 O	Full match	No results	Partial match	Full match	-0.39	136.089	10.591	1.20423e+06	28	0			No matches found	No matches found	No matches found	Multiple matches found	Single match found	No MS2	1.20423e+06
		No results	No results	No results	No results		192.146	10.591	1.01702e+06	0	0			No matches found	No matches found	No matches found	No matches found	No matches found	DDA for preferred ion	1.01702e+06
1-(3,3,5-Trimethyl-1-cyclohexen-1-yl)-4-penten-1-one	C14 H22 O	Full match	No results	Partial match	Full match	-0.35	206.167	10.592	5.26699e+06	44	0			No matches found	No matches found	No matches found	Multiple matches found	No matches found	DDA for preferred ion	5.26699e+06
[(3E)-6-Methyl-3-hepten-1-yl]benzene	C14 H20	Full match	No results	Full match	No results	-0.92	188.156	10.592	3.93614e+06	4	0			No matches found	No matches found	No matches found	No matches found	No matches found	DDA for preferred ion	3.93614e+06
SW-B	C13 H23 N O	Full match	No results	Partial match	Full match	-0.29	209.178	10.592	3.62148e+06	16	0			No matches found	No matches found	No matches found	No matches found	Single match found	DDA for preferred ion	3.62148e+06
2,4-Dimethyl-1-vinylbenzene	C10 H12	Full match	No results	Partial match	Full match	-0.78	132.094	10.592	2.22163e+06	11	0			No matches found	No matches found	No matches found	Multiple matches found	No matches found	No MS2	2.22163e+06
3-Vinyltoluene	C9 H10	Full match	No results	Partial match	Full match	-0.72	118.078	10.592	2.04066e+06	8	0			No matches found	No matches found	No matches found	Single match found	No matches found	No MS2	2.04066e+06
		No results	No results	No results	No results		241.21	10.592	1.75143e+06	0	0			No matches found	No matches found	No matches found	No matches found	No matches found	DDA for preferred ion	1.75143e+06
2-methyl-2,4-hexadiene	C7 H12	Full match	No results	Partial match	Full match	-0.91	96.0938	10.592	1.47096e+06	5	0			No matches found	No matches found	No matches found	No matches found	Single match found	No MS2	1.47096e+06
Inflatin B	C29 H40 O6	No match	No results	No match	Full match	0.5	484.283	10.634	4.29414e+06	2	0			No matches found	No matches found	No matches found	No matches found	Multiple matches found	No MS2	4.29414e+06
Palmitoyl ethanolamide	C18 H37 N O2	Full match	Full match	Full match	Full match	0.3	299.283	10.635	2.86014e+06	42	1	97.9	81.7	No matches found	No matches found	Multiple matches found	No matches found	No matches found	DDA for preferred ion	2.86014e+06
hexamethylcyclotrisiloxane	C6 H18 O3 Si3	No match	No results	No match	Full match	-0.16	222.056	10.643	1.17665e+06	3	0			No matches found	No matches found	Multiple matches found	Single match found	Single match found	No MS2	1.17665e+06
Octamethylcyclotetrasiloxane	C8 H24 O4 Si4	No match	No results	Full match	Full match	-0.25	296.075	10.644	1.66163e+06	38	0			No matches found	No matches found	No matches found	Single match found	Single match found	No MS2	1.66163e+06
Didemethylasterriquinone D	C22 H14 N2 O4	No match	No results	Partial match	Full match	-3.8	370.094	10.647	1.80664e+06	104	0			No matches found	No matches found	No matches found	Single match found	Single match found	DDA for preferred ion	1.80664e+06
Dodecamethylcyclohexasiloxane	C12 H36 O6 Si6	No match	No results	No match	Full match	-1.17	444.112	10.648	1.87359e+06	3	0			No matches found	No matches found	No matches found	Single match found	No matches found	No MS2	1.87359e+06
	C45 H87 F2 O4 P	Full match	No results	No results	No results	-0.05	760.631	10.658	2.81431e+06	0	0			No matches found	No matches found	No matches found	No matches found	No matches found	No MS2	2.81431e+06
Bicyclohexyliden-2-one	C12 H18 O	Full match	No results	Partial match	Full match	-0.89	178.136	10.658	2.65157e+06	25	0			No matches found	No matches found	No matches found	Multiple matches found	Multiple matches found	No MS2	2.65157e+06
(9Z)-1-(4-Morpholinyl)-9-octadecen-1-one	C22 H41 N O2	Full match	No results	Not the top hit	Full match	-0.31	351.314	10.659	6.54055e+07	3	0			No matches found	No matches found	No matches found	Single match found	No matches found	DDA for preferred ion	6.54055e+07
Mesitylethylene	C11 H14	Full match	No results	Partial match	Full match	-0.56	146.109	10.66	1.81681e+06	5	0			No matches found	No matches found	No matches found	Single match found	No matches found	No MS2	1.81681e+06
		No results	No results	No results	No results		192.146	10.66	1.27885e+06	0	0			No matches found	No matches found	No matches found	No matches found	No matches found	DDA for preferred ion	1.27885e+06
1-HEPTENYLBENZENE	C13 H18	Full match	No results	Full match	No results	-0.85	174.141	10.661	2.85476e+07	8	0			No matches found	No matches found	No matches found	No matches found	No matches found	DDA for preferred ion	2.85476e+07
10-Methyldodec-3-en-4-olide	C13 H22 O2	Full match	No results	Partial match	Full match	-0.46	210.162	10.661	1.71724e+07	28	0			No matches found	No matches found	No matches found	No matches found	Multiple matches found	DDA for preferred ion	1.71724e+07
		No results	No results	No results	No results		227.194	10.661	7.54933e+06	0	0			No matches found	No matches found	No matches found	No matches found	No matches found	DDA for preferred ion	7.54933e+06
4,10-dihydroxy-10-methyl-dodecan-4-olide	C13 H24 O3	Full match	No results	Partial match	Full match	-0.45	228.172	10.661	3.97964e+06	20	0			No matches found	No matches found	No matches found	No matches found	Multiple matches found	DDA for preferred ion	3.97964e+06
SW-B	C13 H23 N O	Full match	No results	Partial match	Full match	-0.29	209.178	10.661	3.8457e+06	16	0			No matches found	No matches found	No matches found	No matches found	Single match found	DDA for preferred ion	3.8457e+06
1,4-Dimethyl-2-vinylbenzene	C10 H12	Full match	No results	Partial match	Full match	-0.78	132.094	10.661	3.37015e+06	11	0			No matches found	No matches found	No matches found	Multiple matches found	No matches found	DDA for preferred ion	3.37015e+06
N-[1-(1,4'-Bipiperidin-1'-yl)-3-methyl-1-oxo-2-butanyl]-4-methylcyclohexanecarboxamide	C23 H41 N3 O2	Full match	No results	Full match	No results	0.38	391.32	10.661	3.15437e+06	6	0			No matches found	No matches found	No matches found	No matches found	No matches found	DDA for preferred ion	3.15437e+06
	C16 H38 F N5 O	Full match	No results	No results	No results	3.3	335.307	10.661	2.38078e+06	0	0			No matches found	No matches found	No matches found	No matches found	No matches found	DDA for preferred ion	2.38078e+06
Geranylacetate	C12 H20 O2	Full match	No results	Partial match	Full match	0.17	196.146	10.661	2.05893e+06	48	0			No matches found	No matches found	Single match found	Single match found	Multiple matches found	No MS2	2.05893e+06
1,4-Cyclohexadiene	C6 H8	Full match	No results	Full match	No results	-1.13	80.0625	10.661	1.73121e+06	3	0			No matches found	No matches found	No matches found	No matches found	No matches found	No MS2	1.73121e+06
p-cymene	C10 H14	Full match	No results	Full match	Full match	-0.73	134.109	10.661	1.51956e+06	22	0			No matches found	No matches found	No matches found	Single match found	No matches found	No MS2	1.51956e+06
Cyclohexene	C6 H10	Full match	No results	Full match	No results	-0.95	82.0782	10.661	1.21842e+06	10	0			No matches found	No matches found	No matches found	No matches found	No matches found	No MS2	1.21842e+06
Semiplenamide F	C22 H43 N O3	Full match	No results	Not the top hit	Full match	-0.45	369.324	10.662	1.09714e+08	10	0			No matches found	No matches found	No matches found	No matches found	Single match found	DDA for preferred ion	1.09714e+08
(Z)-N-hydroxy-11-methyldodec-2-enamide	C13 H25 N O2	Full match	No results	Full match	No results	-0.36	227.188	10.662	1.07061e+08	8	0			No matches found	No matches found	No matches found	No matches found	No matches found	DDA for preferred ion	1.07061e+08
Pyrrolidine, 1-oleoyl-	C22 H41 N O	Full match	No results	Full match	No results	0.51	335.319	10.662	4.83825e+07	5	0			No matches found	No matches found	No matches found	No matches found	No matches found	DDA for preferred ion	4.83825e+07
beta-Ionone	C13 H20 O	Full match	No results	Partial match	Full match	-0.24	192.151	10.662	2.67086e+07	40	0			No matches found	No matches found	Single match found	No matches found	No matches found	DDA for preferred ion	2.67086e+07
N-(9-oxodecyl)acetamide	C12 H23 N O2	Full match	Full match	Partial match	No results	-0.69	213.173	10.662	8.9995e+06	21	1	52.4	44.9	No matches found	No matches found	No matches found	No matches found	No matches found	DDA for preferred ion	8.9995e+06
		No results	No results	No results	No results		227.184	10.662	7.00633e+06	0	0			No matches found	No matches found	No matches found	No matches found	No matches found	DDA for preferred ion	7.00633e+06
Dihomo-γ-linolenic acid ethyl ester	C22 H38 O2	No results	Full match	Partial match	Full match	-0.25	334.287	10.662	6.26252e+06	11	2	93.8	83.7	No matches found	No matches found	Single match found	No matches found	No matches found	DDA for preferred ion	6.26252e+06
N-{2-[2-(2-Aminoethoxy)ethoxy]ethyl}octadecanamide	C24 H50 N2 O3	Full match	No results	Full match	No results	0.11	414.382	10.662	5.43661e+06	1	0			No matches found	No matches found	No matches found	No matches found	No matches found	DDA for preferred ion	5.43661e+06
2-Methyl-1-hexen-3-yne	C7 H10	Full match	No results	Full match	No results	-1.23	94.0781	10.662	5.01047e+06	3	0			No matches found	No matches found	No matches found	No matches found	No matches found	DDA for preferred ion	5.01047e+06
(9Z)-N-[(3R)-2-Oxo-3-azepanyl]-9-octadecenamide	C24 H44 N2 O2	Full match	No results	Full match	No results	0.02	392.34	10.662	4.69731e+06	4	0			No matches found	No matches found	No matches found	No matches found	No matches found	DDA for preferred ion	4.69731e+06
1,3,6-Octatriene	C8 H12	Full match	No results	Partial match	Full match	-0.88	108.094	10.662	3.95858e+06	8	0			No matches found	No matches found	No matches found	Single match found	Single match found	DDA for preferred ion	3.95858e+06
(5alpha,7alpha)-3-Amino-20-methylpregnan-7-ol	C22 H39 N O	No results	No results	Full match	No results	0.32	333.303	10.662	3.79241e+06	7	0			No matches found	No matches found	No matches found	No matches found	No matches found	DDA for preferred ion	3.79241e+06
1-Dodecyl-5-hexyl-1H-imidazol-2-amine	C21 H41 N3	No results	No results	Full match	No results	0.6	335.33	10.662	3.42491e+06	2	0			No matches found	No matches found	No matches found	No matches found	No matches found	DDA for preferred ion	3.42491e+06
CZ1330000	C12 H16	Full match	No results	Full match	No results	-0.19	160.125	10.662	2.52862e+06	11	0			No matches found	No matches found	No matches found	No matches found	No matches found	No MS2	2.52862e+06
3-Vinyltoluene	C9 H10	Full match	No results	Partial match	Full match	-0.72	118.078	10.662	2.27888e+06	8	0			No matches found	No matches found	No matches found	Single match found	No matches found	No MS2	2.27888e+06
(+)-N-Methylconiine	C9 H19 N	Full match	No results	Not the top hit	Full match	-0.53	141.152	10.662	2.01777e+06	11	0			No matches found	No matches found	Single match found	No matches found	No matches found	No MS2	2.01777e+06
2-methyl-2-bornene	C11 H18	Full match	No results	Partial match	Full match	-0.88	150.141	10.662	1.82306e+06	9	0			No matches found	No matches found	No matches found	No matches found	Multiple matches found	No MS2	1.82306e+06
UNII:6S7S02945H	C13 H25 N O	Full match	No results	Full match	No results	-0.26	211.194	10.662	1.57845e+06	7	0			No matches found	No matches found	No matches found	No matches found	No matches found	No MS2	1.57845e+06
2-methyl-2,4-hexadiene	C7 H12	Full match	No results	Partial match	Full match	-0.91	96.0938	10.662	1.23571e+06	5	0			No matches found	No matches found	No matches found	No matches found	Single match found	No MS2	1.23571e+06
Phenol, dioctyl-	C22 H38 O	Full match	No results	Partial match	Full match	0.63	318.292	10.663	8.73601e+06	5	0			No matches found	No matches found	No matches found	Single match found	No matches found	DDA for preferred ion	8.73601e+06
Pentamethylbenzene	C11 H16	Full match	No results	Full match	No results	-0.83	148.125	10.663	1.0111e+06	7	0			No matches found	No matches found	No matches found	No matches found	No matches found	No MS2	1.0111e+06
Alphaprodine	C16 H23 N O2	No match	Invalid mass	No match	No match	-84175.5	239.189	10.664	9.06609e+06	14	5	93.4	9.7	No matches found	No matches found	No matches found	No matches found	Multiple matches found	DDA for preferred ion	9.06609e+06
MFCD00026548	C22 H47 N	Full match	No results	Full match	No results	-0.04	325.371	10.689	3.22458e+06	1	0			No matches found	No matches found	No matches found	No matches found	No matches found	No MS2	3.22458e+06
N,S-Ditrityl-L-cysteine	C41 H35 N O2 S	No results	No results	Full match	No results	1.16	605.24	10.712	2.1522e+06	21	0			No matches found	No matches found	No matches found	No matches found	No matches found	DDA for preferred ion	2.1522e+06
	C29 H38 F4 O9	Full match	No results	No match	No results	1.66	606.246	10.712	1.44055e+06	37	0			No matches found	No matches found	No matches found	No matches found	No matches found	No MS2	1.44055e+06
	C21 H42 F N O	Full match	No results	No match	No results	-3.86	343.324	10.726	4.60997e+06	6	0			No matches found	No matches found	No matches found	No matches found	No matches found	DDA for preferred ion	4.60997e+06
	C16 H38 F N5 O2	Full match	No results	No results	No results	3.81	351.302	10.741	4.52544e+06	0	0			No matches found	No matches found	No matches found	No matches found	No matches found	DDA for preferred ion	4.52544e+06
(9Z)-1-(4-Morpholinyl)-9-octadecen-1-one	C22 H41 N O2	Full match	No results	Not the top hit	Full match	-0.28	351.314	10.743	6.18852e+07	3	0			No matches found	No matches found	No matches found	Single match found	No matches found	DDA for preferred ion	6.18852e+07
N-HYDROXYETHYL-N-METHYLSTEARAMIDE	C21 H43 N O2	Full match	No results	Full match	No results	-0.32	341.329	10.744	2.57389e+06	4	0			No matches found	No matches found	No matches found	No matches found	No matches found	DDA for preferred ion	2.57389e+06
8-Bromo-2-(3-pyridinylcarbonyl)-1,3,4,12a-tetrahydropyrazino[2,1-c][1,4]benzodiazepine-6,12(2H,11H)-dione	C18 H15 Br N4 O3	No match	Invalid mass	No match	No results	6.14	414.035	10.747	3.23946e+07	31	4	41.1	42.8	No matches found	No matches found	No matches found	No matches found	No matches found	DDA for preferred ion	3.23946e+07
Darunavir	C27 H37 N3 O7 S	No match	No results	No match	Full match	-1.57	547.234	10.78	2.71031e+06	4	0			No matches found	Single match found	No matches found	No matches found	No matches found	DDA for preferred ion	2.71031e+06
	C19 H40 O4	Full match	No results	No match	No results	-0.86	332.292	10.786	6.91673e+06	1	0			No matches found	No matches found	No matches found	No matches found	No matches found	No MS2	6.91673e+06
N-Acetyl-D-sphingosine	C20 H39 N O3	Full match	No results	Partial match	Full match	-0.74	341.293	10.802	1.34285e+06	15	0			No matches found	No matches found	Single match found	No matches found	No matches found	DDA for preferred ion	1.34285e+06
(2R,3R,4S)-1-Butyl-2-{[(9Z)-9-octadecen-1-yloxy]methyl}-3,4-pyrrolidinediol	C27 H53 N O3	Full match	No results	Full match	No results	0.49	439.403	10.854	3.26016e+06	1	0			No matches found	No matches found	No matches found	No matches found	No matches found	DDA for preferred ion	3.26016e+06
N-(2-Hydroxyethyl)-9-octadecenamide	C20 H39 N O2	Full match	No results	Full match	Full match	-0.65	325.298	10.863	2.07636e+06	13	0			No matches found	No matches found	No matches found	Single match found	Single match found	No MS2	2.07636e+06
cis-N-Butyl-4-(4-octylphenyl)cyclohexanamine	C24 H41 N	Full match	No results	Full match	No results	-0.53	343.324	10.911	4.99081e+06	6	0			No matches found	No matches found	No matches found	No matches found	No matches found	DDA for preferred ion	4.99081e+06
(9Z)-1-(4-Morpholinyl)-9-octadecen-1-one	C22 H41 N O2	Full match	No results	Full match	Full match	-0.32	351.314	10.981	2.92287e+06	3	0			No matches found	No matches found	No matches found	Single match found	No matches found	No MS2	2.92287e+06
	C31 H57 N O6	Full match	No results	No match	No results	-0.49	539.418	11.026	1.46859e+06	1	0			No matches found	No matches found	No matches found	No matches found	No matches found	No MS2	1.46859e+06
(9Z)-1-(4-Morpholinyl)-9-octadecen-1-one	C22 H41 N O2	Full match	No results	Full match	Full match	-0.32	351.314	11.076	1.85112e+06	3	0			No matches found	No matches found	No matches found	Single match found	No matches found	No MS2	1.85112e+06
N-gondoylethanolamine	C22 H43 N O2	Full match	No results	Full match	No results	0.99	353.33	11.129	1.1379e+06	3	0			No matches found	No matches found	No matches found	No matches found	No matches found	No MS2	1.1379e+06
4-[1-(3-Carbamimidoyl-N-{[3-(6-oxo-1(6H)-pyridazinyl)phenyl]sulfonyl}phenylalanyl)-4-piperidinyl]-N-methylbutanamide	C30 H37 N7 O5 S	No results	No results	Full match	No results	-4.34	607.255	11.163	1.61882e+07	21	0			No matches found	No matches found	No matches found	No matches found	No matches found	DDA for preferred ion	1.61882e+07
NP-010770	C33 H40 N2 O9	No match	Invalid mass	No match	No results	-18.79	608.262	11.164	3.03377e+07	35	4	67.5	8.4	No matches found	No matches found	No matches found	No matches found	No matches found	DDA for preferred ion	3.03377e+07
	C24 H41 F2 N6 O4 P3	Full match	No results	No match	No results	-0.66	608.237	11.165	2.58257e+06	31	0			No matches found	No matches found	No matches found	No matches found	No matches found	DDA for preferred ion	2.58257e+06
	C32 H57 F3 N3 O3 P3	Full match	No results	No match	No results	-2.5	681.355	11.194	2.19889e+06	23	0			No matches found	No matches found	No matches found	No matches found	No matches found	DDA for preferred ion	2.19889e+06
	C23 H46 F5 N10 O P S	Full match	No results	No match	No results	0.99	636.324	11.196	1.8753e+06	22	0			No matches found	No matches found	No matches found	No matches found	No matches found	DDA for preferred ion	1.8753e+06
NP-018915	C28 H46 N4 O11	No match	Invalid mass	No match	No match	35782	636.298	11.197	2.99619e+07	1	3	36.1	6.8	No matches found	No matches found	No matches found	No matches found	Single match found	DDA for preferred ion	2.99619e+07
	C33 H53 N O8 P2	Full match	No results	No match	No results	-0.48	653.324	11.197	2.96456e+07	24	0			No matches found	No matches found	No matches found	No matches found	No matches found	DDA for preferred ion	2.96456e+07
TCMDC-138865	C39 H48 Cl N5 O2	No results	No results	Full match	No results	2.81	653.351	11.197	2.08947e+06	17	0			No matches found	No matches found	No matches found	No matches found	No matches found	DDA for preferred ion	2.08947e+06
	C27 H38 F2 N10 O4 S	Full match	No results	No match	No results	-0.24	636.276	11.197	1.50085e+06	26	0			No matches found	No matches found	No matches found	No matches found	No matches found	DDA for preferred ion	1.50085e+06
N-[2-(Diethylamino)ethyl]-2-{6-[2-(2,3-difluorophenyl)ethyl]-2,3-dimethyl-4-oxo-1(4H)-pyridinyl}-N-{[4'-(trifluoromethyl)-4-biphenylyl]methyl}acetamide	C37 H40 F5 N3 O2	No results	No results	Full match	No results	-3.56	653.302	11.197	1.3855e+06	8	0			No matches found	No matches found	No matches found	No matches found	No matches found	DDA for preferred ion	1.3855e+06
Cetrimonium	C19 H41 N	Full match	Full match	No results	No results	0.65	283.324	11.208	1.0477e+07	0	1	93.1	9.7	No matches found	No matches found	No matches found	No matches found	No matches found	DDA for preferred ion	1.0477e+07
Pyrrolidine, 1-oleoyl-	C22 H41 N O	Full match	No results	Full match	No results	0.51	335.319	11.284	4.84791e+06	5	0			No matches found	No matches found	No matches found	No matches found	No matches found	DDA for preferred ion	4.84791e+06
	C24 H46 N2 O2	Full match	No results	No results	No results	-0.58	394.356	11.286	2.58702e+06	0	0			No matches found	No matches found	No matches found	No matches found	No matches found	No MS2	2.58702e+06
Cryptophycin-19	C34 H41 Cl N2 O7	No match	No results	No match	Full match	-3.7	624.258	11.291	1.59856e+07	4	0			No matches found	No matches found	No matches found	No matches found	Multiple matches found	DDA for preferred ion	1.59856e+07
N-[(Benzyloxy)carbonyl]-L-valyl-N-{(2S)-4-[(4-benzyl-5-oxo-2,5-dihydro-3-furanyl)oxy]-1-carboxy-3-oxo-2-butanyl}-L-alaninamide	C32 H37 N3 O10	No results	No results	Full match	No results	3.46	623.25	11.292	6.40013e+06	10	0			No matches found	No matches found	No matches found	No matches found	No matches found	No MS2	6.40013e+06
N-gondoylethanolamine	C22 H43 N O2	Full match	No results	Full match	No results	0.7	353.33	11.298	3.2922e+07	3	0			No matches found	No matches found	No matches found	No matches found	No matches found	DDA for preferred ion	3.2922e+07
Pyrrolidine, 1-oleoyl-	C22 H41 N O	Full match	No results	Full match	No results	0.51	335.319	11.326	6.05009e+06	5	0			No matches found	No matches found	No matches found	No matches found	No matches found	DDA for preferred ion	6.05009e+06
	C30 H51 F O8 P2	Full match	No results	No match	No results	-2.28	620.303	11.33	1.53951e+06	31	0			No matches found	No matches found	No matches found	No matches found	No matches found	DDA for preferred ion	1.53951e+06
Dimantine	C20 H43 N	Full match	No results	Full match	No results	0.63	297.34	11.347	4.36371e+06	2	0			No matches found	No matches found	No matches found	No matches found	No matches found	DDA for preferred ion	4.36371e+06
	C21 H45 N3 O5	Full match	No results	No match	No results	3.35	419.337	11.361	8.24813e+06	1	0			No matches found	No matches found	No matches found	No matches found	No matches found	DDA for preferred ion	8.24813e+06
	C36 H77 N7 O P2	Full match	No results	No results	No results	-0.04	685.566	11.361	4.35685e+06	0	0			No matches found	No matches found	No matches found	No matches found	No matches found	No MS2	4.35685e+06
	C45 H70 O5	Full match	No results	No match	No results	0.35	690.523	11.362	4.73185e+06	1	0			No matches found	No matches found	No matches found	No matches found	No matches found	DDA for preferred ion	4.73185e+06
		No results	No results	No results	No results		689.526	11.362	3.19919e+06	0	0			No matches found	No matches found	No matches found	No matches found	No matches found	DDA for preferred ion	3.19919e+06
(4S,5S)-4-Methyl-5-undecyl-1,3-oxazolidin-2-one	C15 H29 N O2	Full match	No results	Full match	No results	-0.22	255.22	11.373	9.03081e+06	9	0			No matches found	No matches found	No matches found	No matches found	No matches found	DDA for preferred ion	9.03081e+06
Didodecyl-3,3-thiodipropionate (DLTDP)	C30 H58 O4 S	Full match	Full match	No match	Full match	-0.03	514.406	11.378	2.82441e+07	1	5	98.3	83.6	No matches found	No matches found	No matches found	Single match found	No matches found	DDA for preferred ion	2.82441e+07
(1S,4S,5aS,9aS)-1,7,7-Tributyl-4-(hydroxymethyl)-5a-methyldecahydro-2H-3-benzazepin-2-one	C24 H45 N O2	Full match	No results	Full match	No results	0.21	379.345	11.391	1.57899e+06	5	0			No matches found	No matches found	No matches found	No matches found	No matches found	DDA for preferred ion	1.57899e+06
N-isobutyl-2,4-eicosadienamide	C24 H45 N O	Full match	No results	Full match	No results	1.6	363.351	11.393	1.33952e+06	6	0			No matches found	No matches found	No matches found	No matches found	No matches found	DDA for preferred ion	1.33952e+06
4-[1-(3-Carbamimidoyl-N-{[3-(6-oxo-1(6H)-pyridazinyl)phenyl]sulfonyl}phenylalanyl)-4-piperidinyl]-N-methylbutanamide	C30 H37 N7 O5 S	No results	No results	Full match	No results	-4.34	607.255	11.425	2.948e+07	21	0			No matches found	No matches found	No matches found	No matches found	No matches found	DDA for preferred ion	2.948e+07
NP-010770	C33 H40 N2 O9	No match	Invalid mass	No match	No results	-18.68	608.262	11.431	8.97005e+07	35	6	65.9	8.3	No matches found	No matches found	No matches found	No matches found	No matches found	DDA for preferred ion	8.97005e+07
	C19 H41 F6 N6 O3 P3	Full match	No results	No match	No results	0.58	608.236	11.431	8.6373e+06	32	0			No matches found	No matches found	No matches found	No matches found	No matches found	DDA for preferred ion	8.6373e+06
Didemethylasterriquinone D	C22 H14 N2 O4	Unused	No results	Partial match	Full match	-3.14	370.094	11.543	9.09189e+06	85	0			No matches found	No matches found	No matches found	Single match found	Single match found	DDA for preferred ion	9.09189e+06
	C25 H29 Cl N9 P S	Full match	No results	No match	No results	-1.62	553.168	11.543	2.51861e+06	35	0			No matches found	No matches found	No matches found	No matches found	No matches found	No MS2	2.51861e+06
		No results	No results	No results	No results		227.183	11.578	1.10379e+06	0	0			No matches found	No matches found	No matches found	No matches found	No matches found	DDA for preferred ion	1.10379e+06
(Z)-N-hydroxy-11-methyldodec-2-enamide	C13 H25 N O2	Full match	No results	Full match	No results	-0.21	227.188	11.58	2.33934e+07	8	0			No matches found	No matches found	No matches found	No matches found	No matches found	DDA for preferred ion	2.33934e+07
NP-017152	C13 H23 N O2	Full match	Full match	Partial match	Partial match	-0.59	225.173	11.58	1.72917e+07	22	1	48.3	7.4	No matches found	No matches found	No matches found	Single match found	Multiple matches found	DDA for preferred ion	1.72917e+07
1,1,6-Trimethyl-1,2-dihydronaphthalene	C13 H16	Full match	No results	Full match	No results	-0.36	172.125	11.58	7.55565e+06	6	0			No matches found	No matches found	No matches found	No matches found	No matches found	No MS2	7.55565e+06
3420	C13 H18 O	Full match	No results	Full match	No results	0.21	190.136	11.58	5.6633e+06	26	0			No matches found	No matches found	No matches found	No matches found	No matches found	No MS2	5.6633e+06
1-HEPTENYLBENZENE	C13 H18	Full match	No results	Full match	No results	-0.85	174.141	11.58	4.98447e+06	8	0			No matches found	No matches found	No matches found	No matches found	No matches found	DDA for preferred ion	4.98447e+06
5-(6-hydroxy-6-methyloctyl)-2,5-dihydrofuran-2-one	C13 H22 O3	No match	Invalid mass	No match	No results	75286.1	243.183	11.58	4.96608e+06	9	2	86.1	79.6	No matches found	No matches found	No matches found	No matches found	No matches found	DDA for preferred ion	4.96608e+06
beta-Ionone	C13 H20 O	Full match	No results	Partial match	Full match	0	192.151	11.58	4.79571e+06	40	0			No matches found	No matches found	Single match found	No matches found	No matches found	DDA for preferred ion	4.79571e+06
NP-017152	C13 H23 N O2	No match	Invalid mass	No match	No results	-79985.1	207.162	11.58	3.31474e+06	43	1	49.6	44.4	No matches found	No matches found	No matches found	No matches found	No matches found	DDA for preferred ion	3.31474e+06
1,3-Diisopropylbenzene	C12 H18	Full match	No results	Partial match	Full match	-0.06	162.141	11.58	2.60026e+06	14	0			No matches found	No matches found	No matches found	Multiple matches found	No matches found	DDA for preferred ion	2.60026e+06
2-Methyl-1-hexen-3-yne	C7 H10	Full match	No results	Full match	No results	-1.23	94.0781	11.58	1.48919e+06	3	0			No matches found	No matches found	No matches found	No matches found	No matches found	DDA for preferred ion	1.48919e+06
5,5-Bis(methylperoxy)nonane	C11 H24 O4	Full match	No results	Not the top hit	No results	1.7	220.168	11.58	1.27193e+06	22	0			No matches found	No matches found	No matches found	No matches found	No matches found	DDA for preferred ion	1.27193e+06
	C44 H85 F2 N4 O2 P	Full match	No results	No results	No results	-0.02	770.638	11.58	1.21195e+06	0	0			No matches found	No matches found	No matches found	No matches found	No matches found	No MS2	1.21195e+06
exo-1,7,7-Trimethylbicyclo(2.2.1)hept-2-yl acrylate	C13 H20 O2	Full match	No results	Partial match	Full match	-0.13	208.146	11.581	9.26915e+06	50	0			No matches found	No matches found	No matches found	Single match found	Multiple matches found	No MS2	9.26915e+06
	C19 H41 N3 O6	Full match	No results	No match	No results	4.37	407.301	11.581	5.97628e+06	1	0			No matches found	No matches found	No matches found	No matches found	No matches found	DDA for preferred ion	5.97628e+06
10-Methyldodec-3-en-4-olide	C13 H22 O2	Full match	No results	Partial match	Full match	-0.25	210.162	11.581	2.87139e+06	28	0			No matches found	No matches found	No matches found	No matches found	Multiple matches found	DDA for preferred ion	2.87139e+06
Laurolactam	C12 H23 N O	Full match	Full match	Full match	No results	-0.77	197.178	11.581	2.7345e+06	5	1	54.3	41.7	No matches found	No matches found	No matches found	No matches found	No matches found	DDA for preferred ion	2.7345e+06
BE-14106	C27 H37 N O3	Not the top hit	No results	Not the top hit	Full match	-4.79	423.275	11.581	2.01048e+06	47	0			No matches found	No matches found	No matches found	No matches found	Single match found	DDA for preferred ion	2.01048e+06
		No results	No results	No results	No results		227.194	11.581	1.35498e+06	0	0			No matches found	No matches found	No matches found	No matches found	No matches found	DDA for preferred ion	1.35498e+06
(1RS,6SR,10SR)-6,10-dimethylbicyclo[4.4.0]decan-3-one	C12 H20 O	Full match	No results	Partial match	Full match	-1.1	180.151	11.581	1.13443e+06	13	0			No matches found	No matches found	No matches found	No matches found	Multiple matches found	DDA for preferred ion	1.13443e+06
12-Aminododecyl 2,6-diamino-2,6-dideoxy-beta-D-glucopyranoside	C18 H39 N3 O4	No results	No results	Full match	No results	4.89	361.296	11.581	953225	1	0			No matches found	No matches found	No matches found	No matches found	No matches found	No MS2	953225
N-[(2S)-4-[(5-Chloro-2-pyridinyl)amino]-1,4-dioxo-1-(1-piperidinyl)-2-butanyl]-2'-{[(2-methoxyethyl)(methyl)amino]methyl}-4-biphenylcarboxamide	C32 H38 Cl N5 O4	No results	No results	Full match	No results	-0.65	591.261	11.619	3.94581e+07	45	0			No matches found	No matches found	No matches found	No matches found	No matches found	DDA for preferred ion	3.94581e+07
	C20 H44 N6 O14	Full match	No results	No match	No results	1.24	592.292	11.62	1.46781e+07	24	0			No matches found	No matches found	No matches found	No matches found	No matches found	DDA for preferred ion	1.46781e+07
Arthripenoid A	C31 H45 N O8 S	No results	No results	No match	Full match	-2.13	591.285	11.621	4.18251e+06	45	0			No matches found	No matches found	No matches found	No matches found	Single match found	DDA for preferred ion	4.18251e+06
Methyl 3-({3-[4-(methoxycarbonyl)-4-phenyl-1-piperidinyl]propyl}carbamoyl)-6-methyl-4-(4-nitrophenyl)-2-oxo-1,2,3,4-tetrahydro-5-pyrimidinecarboxylate	C30 H35 N5 O8	No results	No results	Full match	No results	-1	593.248	11.622	3.13481e+06	13	0			No matches found	No matches found	No matches found	No matches found	No matches found	DDA for preferred ion	3.13481e+06
	C15 H39 F4 N10 O2 P3 S	Full match	No results	No match	No results	-1.89	592.212	11.622	1.63883e+06	44	0			No matches found	No matches found	No matches found	No matches found	No matches found	DDA for preferred ion	1.63883e+06
2-[[(5S,6R,9S)-14-[[(2-fluoroanilino)-oxomethyl]amino]-5-methoxy-3,6,9-trimethyl-2-oxo-11-oxa-3,8-diazabicyclo[10.4.0]hexadeca-1(12),13,15-trien-8-yl]methyl]benzoic acid	C32 H37 F N4 O6	Full match	No results	Not the top hit	No results	-3.18	592.268	11.623	1.78352e+08	32	0			No matches found	No matches found	No matches found	No matches found	No matches found	DDA for preferred ion	1.78352e+08
	C25 H42 F N S	Full match	No results	No match	No results	-2.17	407.301	11.717	1.93928e+06	1	0			No matches found	No matches found	No matches found	No matches found	No matches found	No MS2	1.93928e+06
(Z)-N-hydroxy-11-methyldodec-2-enamide	C13 H25 N O2	Full match	No results	Full match	No results	-0.2	227.188	11.718	1.72868e+07	8	0			No matches found	No matches found	No matches found	No matches found	No matches found	DDA for preferred ion	1.72868e+07
5-(6-hydroxy-6-methyloctyl)-2,5-dihydrofuran-2-one	C13 H22 O3	No match	Invalid mass	No match	No results	75285.8	243.183	11.718	9.61752e+06	9	2	79.1	74.5	No matches found	No matches found	No matches found	No matches found	No matches found	DDA for preferred ion	9.61752e+06
NP-017152	C13 H23 N O2	Full match	Full match	Partial match	Partial match	-0.59	225.173	11.718	8.68256e+06	22	1	48	7.4	No matches found	No matches found	No matches found	Single match found	Multiple matches found	DDA for preferred ion	8.68256e+06
exo-1,7,7-Trimethylbicyclo(2.2.1)hept-2-yl acrylate	C13 H20 O2	Full match	No results	Partial match	Full match	-0.13	208.146	11.718	4.6202e+06	50	0			No matches found	No matches found	No matches found	Single match found	Multiple matches found	No MS2	4.6202e+06
(2Z)-2-Hepten-1-ylbenzene	C13 H18	Full match	No results	Full match	No results	-0.85	174.141	11.718	3.70933e+06	8	0			No matches found	No matches found	No matches found	No matches found	No matches found	DDA for preferred ion	3.70933e+06
beta-Ionone	C13 H20 O	Full match	No results	Partial match	Full match	0	192.151	11.718	3.54774e+06	40	0			No matches found	No matches found	Single match found	No matches found	No matches found	DDA for preferred ion	3.54774e+06
2-Heptynylbenzene	C13 H16	Full match	No results	Full match	No results	-0.36	172.125	11.718	3.44419e+06	6	0			No matches found	No matches found	No matches found	No matches found	No matches found	DDA for preferred ion	3.44419e+06
Heptanophenone	C13 H18 O	Full match	Full match	Partial match	No results	-0.11	190.136	11.718	2.60788e+06	26	1	52.3	44.8	No matches found	No matches found	No matches found	No matches found	No matches found	DDA for preferred ion	2.60788e+06
1,3-Diisopropylbenzene	C12 H18	Full match	No results	Partial match	Full match	-0.82	162.141	11.718	2.5459e+06	14	0			No matches found	No matches found	No matches found	Multiple matches found	No matches found	DDA for preferred ion	2.5459e+06
(1RS,6SR,10SR)-6,10-dimethylbicyclo[4.4.0]decan-3-one	C12 H20 O	Full match	No results	Partial match	Full match	-1.1	180.151	11.718	2.54225e+06	13	0			No matches found	No matches found	No matches found	No matches found	Multiple matches found	DDA for preferred ion	2.54225e+06
10-Methyldodec-3-en-4-olide	C13 H22 O2	Full match	No results	Partial match	Full match	-0.25	210.162	11.718	2.3413e+06	28	0			No matches found	No matches found	No matches found	No matches found	Multiple matches found	DDA for preferred ion	2.3413e+06
Laurolactam	C12 H23 N O	Full match	Full match	Full match	No results	-0.77	197.178	11.718	2.10378e+06	5	1	51.4	41.2	No matches found	No matches found	No matches found	No matches found	No matches found	DDA for preferred ion	2.10378e+06
NP-006888	C13 H24 O4	Full match	Full match	Partial match	Partial match	-0.47	244.167	11.718	1.695e+06	17	1	66.7	47.5	No matches found	No matches found	No matches found	Single match found	Multiple matches found	DDA for preferred ion	1.695e+06
NP-017152	C13 H23 N O2	No match	Invalid mass	No match	No results	-79985.4	207.162	11.718	1.36883e+06	43	1	42.1	43	No matches found	No matches found	No matches found	No matches found	No matches found	DDA for preferred ion	1.36883e+06
	C53 H83 F O2	Full match	No results	No results	No results	0.04	770.638	11.718	1.18938e+06	0	0			No matches found	No matches found	No matches found	No matches found	No matches found	No MS2	1.18938e+06
		No results	No results	No results	No results		227.194	11.718	1.06636e+06	0	0			No matches found	No matches found	No matches found	No matches found	No matches found	DDA for preferred ion	1.06636e+06
5,5-Bis(methylperoxy)nonane	C11 H24 O4	Full match	No results	Not the top hit	No results	1.42	220.168	11.718	1.04293e+06	22	0			No matches found	No matches found	No matches found	No matches found	No matches found	DDA for preferred ion	1.04293e+06
	C29 H57 N O3	Full match	No results	No results	No results	0.28	467.434	11.753	2.51655e+06	0	0			No matches found	No matches found	No matches found	No matches found	No matches found	No MS2	2.51655e+06
3-Ethyl-N-[(2S,3R)-3-hydroxy-1-phenyl-4-{[3-(trifluoromethyl)benzyl]amino}-2-butanyl]-7-(2-oxo-1-pyrrolidinyl)-1H-indole-5-carboxamide	C33 H35 F3 N4 O3	Full match	No results	Full match	No results	2.84	592.268	11.797	4.55929e+07	6	0			No matches found	No matches found	No matches found	No matches found	No matches found	DDA for preferred ion	4.55929e+07
N-[(2S)-4-[(5-Chloro-2-pyridinyl)amino]-1,4-dioxo-1-(1-piperidinyl)-2-butanyl]-2'-{[(2-methoxyethyl)(methyl)amino]methyl}-4-biphenylcarboxamide	C32 H38 Cl N5 O4	No results	No results	Full match	No results	-0.65	591.261	11.797	2.46442e+07	45	0			No matches found	No matches found	No matches found	No matches found	No matches found	DDA for preferred ion	2.46442e+07
Arthripenoid A	C31 H45 N O8 S	No results	No results	No match	Full match	-2.34	591.285	11.803	1.63887e+06	50	0			No matches found	No matches found	No matches found	No matches found	Single match found	DDA for preferred ion	1.63887e+06
	C4 H5 F2 N O5	Full match	No results	No results	No results	-3.28	185.013	11.865	1.674e+06	0	0			No matches found	No matches found	No matches found	No matches found	No matches found	DDA for preferred ion	1.674e+06
NP-010770	C33 H40 N2 O9	No match	Invalid mass	No match	No results	-18.79	608.262	11.914	1.38988e+06	35	2	57	7.9	No matches found	No matches found	No matches found	No matches found	No matches found	DDA for preferred ion	1.38988e+06
SB236057A	C33 H34 N4 O3	No match	Full match	Full match	No match	-2.59	534.262	11.94	1.65419e+07	83	2	81.5	9.1	No matches found	No matches found	No matches found	No matches found	Single match found	DDA for preferred ion	1.65419e+07
N-[(1-{[(4S)-3-{[(2-Methyl-2-propanyl)oxy]carbonyl}-1,3-thiazolidin-4-yl]carbonyl}-4-phenyl-4-piperidinyl)carbonyl]-L-leucine	C27 H39 N3 O6 S	No results	No results	Full match	No results	-2.38	533.255	11.94	1.00826e+07	90	0			No matches found	No matches found	No matches found	No matches found	No matches found	DDA for preferred ion	1.00826e+07
5-Olefin phenylpyropene A	C32 H36 O9	Not the top hit	No results	No match	Full match	2.41	564.237	11.95	1.19159e+07	15	0			No matches found	No matches found	No matches found	No matches found	Single match found	DDA for preferred ion	1.19159e+07
Stearamide	C18 H37 N O	Full match	No results	Partial match	Full match	0.57	283.288	11.981	4.48097e+06	19	0			No matches found	No matches found	No matches found	Single match found	No matches found	No MS2	4.48097e+06
Stearoyl Ethanolamide	C20 H41 N O2	No match	Invalid mass	No match	No results	-55025.4	309.303	12.043	2.00666e+07	13	2	32.6	38.1	No matches found	No matches found	No matches found	No matches found	No matches found	DDA for preferred ion	2.00666e+07
(22E)-23-methylergosta-5, 7-22-trien-3β-ol	C29 H46 O	Not the top hit	No results	Partial match	Full match	0.84	410.355	12.047	2.48627e+06	13	0			No matches found	No matches found	Multiple matches found	No matches found	Single match found	DDA for preferred ion	2.48627e+06
	C21 H45 N	Full match	No results	No results	No results	0.33	311.355	12.113	2.25476e+06	0	0			No matches found	No matches found	No matches found	No matches found	No matches found	No MS2	2.25476e+06
(1R,9S)-5-[(E)-2-(4-Chlorophenyl)vinyl]-11-(5-pyrimidinylcarbonyl)-7,11-diazatricyclo[7.3.1.02,7]trideca-2,4-dien-6-one	C24 H21 Cl N4 O2	No match	Invalid mass	No match	No results	87848.8	470.098	12.16	6.50775e+07	56	9	64.4	8.2	No matches found	No matches found	No matches found	No matches found	No matches found	DDA for preferred ion	6.50775e+07
	C10 H23 F2 N6 O7 P S2	Full match	No results	No match	No results	1.23	472.078	12.16	1.88569e+06	53	0			No matches found	No matches found	No matches found	No matches found	No matches found	DDA for preferred ion	1.88569e+06
(2E,4E)-N-Isobutyl-2,4-octadecadienamide	C22 H41 N O	Full match	No results	Full match	No results	1.15	335.319	12.184	2.60303e+06	5	0			No matches found	No matches found	No matches found	No matches found	No matches found	No MS2	2.60303e+06
N-dodecanoylsphinganine	C30 H61 N O3	Full match	No results	Full match	No results	-0.59	483.465	12.247	3.12081e+06	1	0			No matches found	No matches found	No matches found	No matches found	No matches found	DDA for preferred ion	3.12081e+06
	C39 H81 F N9 O P	Full match	No results	No results	No results	-0.06	741.629	12.264	1.41836e+06	0	0			No matches found	No matches found	No matches found	No matches found	No matches found	No MS2	1.41836e+06
	C42 H85 F N2 O P2 S	Full match	No results	No results	No results	0.04	746.584	12.265	2.01932e+06	0	0			No matches found	No matches found	No matches found	No matches found	No matches found	DDA for preferred ion	2.01932e+06
	C42 H27 Cl F N3	Full match	No results	No match	No results	-1.01	627.187	12.292	7.00495e+06	15	0			No matches found	No matches found	No matches found	No matches found	No matches found	No MS2	7.00495e+06
Didemethylasterriquinone D	C22 H14 N2 O4	No match	No results	No match	Full match	-3.72	370.094	12.292	2.49274e+06	1	0			No matches found	No matches found	No matches found	Single match found	Single match found	DDA for preferred ion	2.49274e+06
	C23 H49 N	Full match	No results	No results	No results	-0.3	339.386	12.305	5.36958e+06	0	0			No matches found	No matches found	No matches found	No matches found	No matches found	No MS2	5.36958e+06
Desferrioxamine Et3	C24 H42 N6 O12	No match	No results	No match	Full match	-3.74	606.284	12.379	1.66558e+06	6	0			No matches found	No matches found	No matches found	No matches found	Single match found	No MS2	1.66558e+06
	C37 H43 Cl F N S4	Full match	No results	No match	No results	-0.32	683.195	12.5	6.62595e+07	8	0			No matches found	No matches found	No matches found	No matches found	No matches found	DDA for preferred ion	6.62595e+07
Cylindrocyclophane E	C38 H58 O6	No match	No results	No match	Full match	-4.02	610.421	12.567	5.06851e+06	6	0			No matches found	No matches found	No matches found	No matches found	Single match found	DDA for preferred ion	5.06851e+06
Epopromycin A	C21 H36 N2 O6	Not the top hit	No results	Not the top hit	Full match	3.64	412.259	12.603	2.29365e+06	25	0			No matches found	No matches found	No matches found	No matches found	Single match found	No MS2	2.29365e+06
Phthalic anhydride	C8 H4 O3	Full match	No results	Full match	Full match	-1.58	148.016	12.607	1.61617e+06	1	0			No matches found	No matches found	No matches found	Single match found	No matches found	No MS2	1.61617e+06
	C4 H5 F2 N O5	Full match	No results	No results	No results	-3.28	185.013	12.661	2.44877e+06	0	0			No matches found	No matches found	No matches found	No matches found	No matches found	No MS2	2.44877e+06
	C29 H37 F N6	Full match	No results	No match	No results	-0.48	488.306	12.743	6.5599e+06	3	0			No matches found	No matches found	No matches found	No matches found	No matches found	DDA for preferred ion	6.5599e+06
Leiwansterol A	C29 H48 O4	Not the top hit	No results	Partial match	Full match	-0.17	460.355	12.743	3.00434e+06	32	0			No matches found	No matches found	No matches found	No matches found	Single match found	DDA for preferred ion	3.00434e+06
N,N-Dimethyloctadecanamide	C20 H41 N O	Full match	No results	Partial match	Full match	0.65	311.319	12.782	5.53522e+06	8	0			No matches found	No matches found	No matches found	Single match found	No matches found	No MS2	5.53522e+06
		No results	No results	No results	No results		674.668	12.8	7.64356e+06	0	0			No matches found	No matches found	No matches found	No matches found	No matches found	No MS2	7.64356e+06
N-(2-Aminoethyl)-N'-(1,5-dicyclohexyl-3-pentanyl)-1,2-ethanediamine	C21 H43 N3	No results	No results	Full match	No results	0.16	337.346	12.802	2.30054e+07	4	0			No matches found	No matches found	No matches found	No matches found	No matches found	DDA for preferred ion	2.30054e+07
2-Octadecylfuran	C22 H40 O	Full match	No results	Full match	No results	0.45	320.308	12.802	9.32298e+06	1	0			No matches found	No matches found	No matches found	No matches found	No matches found	No MS2	9.32298e+06
		No results	No results	No results	No results		337.323	12.802	8.43815e+06	0	0			No matches found	No matches found	No matches found	No matches found	No matches found	DDA for preferred ion	8.43815e+06
Erucamide	C22 H43 N O	Full match	Full match	Full match	Full match	0.25	337.335	12.806	3.15695e+08	12	4	95.6	87	No matches found	No matches found	No matches found	Single match found	No matches found	DDA for preferred ion	3.15695e+08
	C30 H67 N6 O P	Full match	No results	No match	No results	-1.96	558.51	12.841	2.03846e+07	3	0			No matches found	No matches found	No matches found	No matches found	No matches found	No MS2	2.03846e+07
	C34 H68 N2 O2	Full match	No results	No results	No results	0.2	536.528	12.847	9.63302e+07	0	0			No matches found	No matches found	No matches found	No matches found	No matches found	DDA for preferred ion	9.63302e+07
	C39 H58 F2 O3	Full match	No results	No match	No results	2.71	612.437	12.847	1.04464e+07	15	0			No matches found	No matches found	No matches found	No matches found	No matches found	DDA for preferred ion	1.04464e+07
		No results	No results	No results	No results		536.548	12.851	5.05413e+06	0	0			No matches found	No matches found	No matches found	No matches found	No matches found	DDA for preferred ion	5.05413e+06
NP-014287	C18 H32 O3	No match	Invalid mass	No match	No match	-60798.5	278.224	12.892	2.28717e+07	78	25	98.1	98.4	No matches found	No matches found	Multiple matches found	Multiple matches found	Multiple matches found	DDA for preferred ion	2.28717e+07
	C36 H59 F3 O3	Full match	No results	No match	No results	-0.4	596.441	12.897	4.16957e+06	1	0			No matches found	No matches found	No matches found	No matches found	No matches found	DDA for preferred ion	4.16957e+06
	C43 H35 Cl F2 N O2 P	Full match	No results	Unused	No results	0.21	701.206	12.902	1.04998e+07	5	0			No matches found	No matches found	No matches found	No matches found	No matches found	DDA for preferred ion	1.04998e+07
	C41 H70 F2 N7 P	Full match	No results	No match	No results	-0.41	729.54	12.932	6.95072e+06	2	0			No matches found	No matches found	No matches found	No matches found	No matches found	DDA for preferred ion	6.95072e+06
	C23 H49 N	Full match	No results	No results	No results	-0.3	339.386	12.974	8.05823e+06	0	0			No matches found	No matches found	No matches found	No matches found	No matches found	No MS2	8.05823e+06
TOA	C24 H51 N	Full match	No results	Full match	No results	-0.01	353.402	13.083	4.06635e+06	1	0			No matches found	No matches found	No matches found	No matches found	No matches found	DDA for preferred ion	4.06635e+06
N,N-Dimethyloctadecanamide	C20 H41 N O	Full match	No results	Partial match	Full match	0.65	311.319	13.102	1.249e+06	8	0			No matches found	No matches found	No matches found	Single match found	No matches found	No MS2	1.249e+06
	C25 H53 N	Full match	No results	No results	No results	0.01	367.418	13.104	3.95991e+07	0	0			No matches found	No matches found	No matches found	No matches found	No matches found	No MS2	3.95991e+07
NP-014287	C18 H32 O3	No match	Invalid mass	No match	No match	-60798.5	278.224	13.173	2.82266e+06	78	10	96.2	90	No matches found	No matches found	Multiple matches found	Multiple matches found	Multiple matches found	DDA for preferred ion	2.82266e+06
Lanosta-8,24-dien-3beta,23-diol	C29 H48 O2	Full match	No results	Partial match	Full match	0.22	428.366	13.18	1.73561e+06	45	0			No matches found	No matches found	Multiple matches found	No matches found	Single match found	DDA for preferred ion	1.73561e+06
	C32 H60 O5	Full match	No results	No match	No results	-0.24	524.444	13.243	8.84706e+06	2	0			No matches found	No matches found	No matches found	No matches found	No matches found	DDA for preferred ion	8.84706e+06
	C30 H55 F N4 O	Full match	No results	No match	No results	-4.16	506.434	13.244	2.28843e+06	1	0			No matches found	No matches found	No matches found	No matches found	No matches found	DDA for preferred ion	2.28843e+06
OPEO	C16 H26 O2	Not the top hit	Full match	Partial match	Not the top hit	0.32	250.193	13.244	1.66986e+06	48	1	63.1	65.9	No matches found	No matches found	Multiple matches found	Multiple matches found	Single match found	DDA for preferred ion	1.66986e+06
	C33 H54 N4 O	Full match	No results	No results	No results	-1.91	522.429	13.312	6.39005e+06	0	0			No matches found	No matches found	No matches found	No matches found	No matches found	DDA for preferred ion	6.39005e+06
	C30 H58 F N5 O2	Full match	No results	No results	No results	-3.3	539.456	13.312	3.08659e+06	0	0			No matches found	No matches found	No matches found	No matches found	No matches found	DDA for preferred ion	3.08659e+06
	C31 H56 F N O S	Full match	No results	No match	No results	3.47	509.408	13.316	3.286e+06	1	0			No matches found	No matches found	No matches found	No matches found	No matches found	DDA for preferred ion	3.286e+06
9-Oxo-10(E),12(E)-octadecadienoic acid	C18 H30 O3	Not the top hit	Full match	Full match	Partial match	0.74	294.22	13.353	3.30628e+06	50	18	97.4	95.5	No matches found	No matches found	Multiple matches found	No matches found	Multiple matches found	DDA for preferred ion	3.30628e+06
	C53 H33 Cl F3 N	Full match	No results	No match	No results	-0.28	775.225	13.424	1.02081e+07	1	0			No matches found	No matches found	No matches found	No matches found	No matches found	DDA for preferred ion	1.02081e+07
(±)13-HpODE	C18 H32 O4	No match	Invalid mass	No match	No match	-57682.9	294.22	13.45	5.6212e+06	51	18	93.2	83.5	No matches found	No matches found	Multiple matches found	No matches found	Multiple matches found	DDA for preferred ion	5.6212e+06
Palmitoleic Acid	C16 H30 O2	No match	Invalid mass	No match	No match	86476.3	276.209	13.456	1.20295e+07	56	5	67	67.1	No matches found	No matches found	Single match found	Single match found	Single match found	DDA for preferred ion	1.20295e+07
Bicyclohexyliden-2-one	C12 H18 O	Full match	No results	Partial match	Full match	-0.55	178.136	13.457	4.27634e+06	25	0			No matches found	No matches found	No matches found	Multiple matches found	Multiple matches found	DDA for preferred ion	4.27634e+06
	C30 H57 N O5	Full match	No results	No results	No results	-0.2	511.424	13.473	1.81582e+06	0	0			No matches found	No matches found	No matches found	No matches found	No matches found	DDA for preferred ion	1.81582e+06
(4aS,5S,6S,8aS)-2-(6,10-Dimethyl-2-undecanyl)-5,8a-dimethyldecahydro-6-isoquinolinol	C24 H47 N O	Full match	No results	Full match	No results	-0.15	365.366	13.483	6.28761e+06	7	0			No matches found	No matches found	No matches found	No matches found	No matches found	No MS2	6.28761e+06
	C30 H59 F3 O2	Full match	No results	No match	No results	4.12	508.449	13.488	1.88899e+06	3	0			No matches found	No matches found	No matches found	No matches found	No matches found	DDA for preferred ion	1.88899e+06
	C27 H59 N8 P	Full match	No results	No results	No results	-0.24	526.46	13.489	4.2842e+06	0	0			No matches found	No matches found	No matches found	No matches found	No matches found	DDA for preferred ion	4.2842e+06
	C32 H46 F2	Full match	No results	No match	No results	2.24	468.358	13.495	4.26733e+06	1	0			No matches found	No matches found	No matches found	No matches found	No matches found	DDA for preferred ion	4.26733e+06
Docosanamide	C22 H45 N O	Full match	No results	Partial match	Full match	-0.18	339.35	13.498	5.54002e+06	2	0			No matches found	No matches found	No matches found	Single match found	No matches found	No MS2	5.54002e+06
	C32 H60 O5	Full match	No results	No match	No results	-0.21	524.444	13.538	1.17303e+07	2	0			No matches found	No matches found	No matches found	No matches found	No matches found	DDA for preferred ion	1.17303e+07
	C32 H63 N O5	Full match	No results	No results	No results	1.02	541.471	13.539	4.99214e+06	0	0			No matches found	No matches found	No matches found	No matches found	No matches found	DDA for preferred ion	4.99214e+06
(2S,3R,4E,8E)-1-(β-D-glucopyranosyl)-3-hydroxy-2-[(R)-2′-hydroxyhexadecanoyl]amino-9-methyl-4,8-heptadecadiene	C40 H75 N O9	No match	No results	Partial match	Full match	-0.61	713.544	13.578	2.50639e+06	4	0			No matches found	No matches found	No matches found	No matches found	Multiple matches found	DDA for preferred ion	2.50639e+06
Beyer-15-en-19-yl stearate	C38 H66 O2	Full match	No results	Full match	No results	0.65	554.507	13.661	3.62372e+07	2	0			No matches found	No matches found	No matches found	No matches found	No matches found	DDA for preferred ion	3.62372e+07
	C30 H58 O5 S	Full match	No results	No match	No results	0.37	530.401	13.793	5.46391e+07	2	0			No matches found	No matches found	No matches found	No matches found	No matches found	DDA for preferred ion	5.46391e+07
10-Oxo-10-[(3-oxoolean-12-en-28-yl)oxy]decanoic acid	C40 H64 O5	Full match	No results	Full match	No results	1	624.476	13.793	7.60073e+06	1	0			No matches found	No matches found	No matches found	No matches found	No matches found	DDA for preferred ion	7.60073e+06
N-{(2S)-1-[3-(Adamantan-1-yl)-2,4-dioxo-1-imidazolidinyl]-6-amino-2-hexanyl}dodecanamide	C31 H54 N4 O3	No results	No results	Full match	No results	-0.09	530.42	13.793	2.64784e+06	2	0			No matches found	No matches found	No matches found	No matches found	No matches found	DDA for preferred ion	2.64784e+06
(5S)-4-(Cyclohexylmethyl)-1-{4-[(2S)-1-(cyclohexylmethyl)-5,6-dioxo-2-piperazinyl]butyl}-5-isobutyl-2,3-piperazinedione	C30 H50 N4 O4	No results	No results	Full match	No results	-2.61	530.382	13.793	2.59943e+06	10	0			No matches found	No matches found	No matches found	No matches found	No matches found	DDA for preferred ion	2.59943e+06
4_4'-Diapophytoene	C30 H48	Not the top hit	No results	Partial match	Full match	0.51	408.376	13.86	1.44051e+07	6	0			No matches found	No matches found	Single match found	No matches found	No matches found	DDA for preferred ion	1.44051e+07
	C5 H2 F O2 P	Full match	No results	No results	No results	1.83	143.978	13.888	2.38742e+06	0	0			No matches found	No matches found	No matches found	No matches found	No matches found	DDA for preferred ion	2.38742e+06
1-(9Z-hexadecenoyl)-2-(9Z,12Z-octadecadienoyl)-sn-glycerol	C37 H66 O5	No results	No results	Full match	No results	-1.57	590.49	13.942	419966	18	0			No matches found	No matches found	No matches found	No matches found	No matches found	No MS2	419966
N-Dodecyl-N-[2-({[(11beta,16alpha,17alpha)-9-fluoro-11,17-dihydroxy-16-methyl-3-oxoandrosta-1,4-dien-17-yl]carbonyl}amino)ethyl]-N-methyl-1-dodecanaminium	C48 H84 F N2 O4	No results	No results	Full match	No results	-4.49	771.638	13.951	746252	2	0			No matches found	No matches found	No matches found	No matches found	No matches found	DDA for preferred ion	746252
		No results	No results	No results	No results		102.948	13.953	3.10932e+06	0	0			No matches found	No matches found	No matches found	No matches found	No matches found	No MS2	3.10932e+06
	C5 H F2 O P	Full match	No results	No results	No results	-3.4	145.973	13.956	2.93465e+06	0	0			No matches found	No matches found	No matches found	No matches found	No matches found	DDA for preferred ion	2.93465e+06
		No results	No results	No results	No results		104.946	13.958	1.40686e+06	0	0			No matches found	No matches found	No matches found	No matches found	No matches found	No MS2	1.40686e+06
	C23 H30 Cl N7 O2 S2	Full match	No results	No match	No results	-1.23	535.158	13.965	1.77814e+09	66	0			No matches found	No matches found	No matches found	No matches found	No matches found	DDA for preferred ion	1.77814e+09
Tetradecamethylcycloheptasiloxane	C14 H42 O7 Si7	No match	No results	Not the top hit	Full match	-0.56	518.131	13.965	5.13587e+07	63	0			No matches found	No matches found	No matches found	Single match found	No matches found	DDA for preferred ion	5.13587e+07
	C21 H35 Cl F N7 S3	Full match	No results	No match	No results	3.11	535.181	13.966	1.56217e+08	46	0			No matches found	No matches found	No matches found	No matches found	No matches found	DDA for preferred ion	1.56217e+08
	C21 H26 Cl N9 O2 S2	Full match	No results	No match	No results	2.09	535.135	13.966	4.46137e+07	38	0			No matches found	No matches found	No matches found	No matches found	No matches found	DDA for preferred ion	4.46137e+07
	C21 H31 N2 O2 P S4	Full match	No results	No match	No results	-0.72	502.1	13.966	1.40773e+07	1	0			No matches found	No matches found	No matches found	No matches found	No matches found	No MS2	1.40773e+07
N-(1,3-benzodioxol-5-yl)-7-chloroquinolin-4-amine	C16 H11 Cl N2 O2	No match	Invalid mass	No match	No match	12.13	298.055	13.966	7.57053e+06	4	6	70.8	8.5	No matches found	Multiple matches found	No matches found	No matches found	No matches found	DDA for preferred ion	7.57053e+06
	C16 H33 Cl F4 N4 O3 S3	Full match	No results	No match	No results	1.62	536.135	13.967	2.39384e+07	26	0			No matches found	No matches found	No matches found	No matches found	No matches found	DDA for preferred ion	2.39384e+07
	C6 H12 F3 N2 O5 P	Full match	No results	No match	No results	4.15	280.045	13.967	3.44461e+06	61	0			No matches found	No matches found	No matches found	No matches found	No matches found	DDA for preferred ion	3.44461e+06

## Sheet: EtOH extract
Table S16: Raw spectral data of E. foeminea ethanol crude extract analyzed using ESI+ LC–MS
Name	Formula	Annot. Source: Predicted Compositions	Annot. Source: mzCloud Search	Annot. Source: ChemSpider Search	Annot. Source: MassList Search	Annot. DeltaMass [ppm]	Calc. MW	RT [min]	Area (Max.)	# ChemSpider Results	# mzCloud Results	mzCloud Best Match	mzCloud Best Match Confidence	Mass List Match: Arita Lab 6549 Flavonoid Structure Database	Mass List Match: EFS HRAM Compound Database	Mass List Match: Endogenous Metabolites database 4400 compounds	Mass List Match: Extractables and Leachables HRAM Compound Database	Mass List Match: Natural Products Atlas 2020_06	MS2	Area: ID_14_EF_ETOH_LCMS.raw (F15)
4-[(3R,4S)-3-hydroxy-3,7-dimethylocta- 1,6-dienyl(9Z, 12Z)- 9,12-octadecadienoate	C28 H48 O3	Full match	No results	Partial match	Full match	1.04	432.361	0.516	718205	26	0			No matches found	No matches found	Multiple matches found	No matches found	Single match found	DDA for preferred ion	718205
N-Methyl-2-pyrrolidone	C5 H9 N O	Full match	Full match	Partial match	Partial match	-0.61	99.0683	0.517	1.37105e+06	63	4	88.1	9.4	No matches found	No matches found	No matches found	Multiple matches found	No matches found	DDA for preferred ion	1.37105e+06
Lanosta-8,24-dien-3beta,23-diol	C29 H48 O2	Full match	No results	Partial match	Full match	-0.35	428.365	0.528	1.56971e+06	61	0			No matches found	No matches found	Multiple matches found	No matches found	Single match found	DDA for preferred ion	1.56971e+06
DILAURYLMETHYLAMINE	C25 H53 N	Full match	No results	Full match	No results	-0.66	367.418	0.531	1.00264e+06	2	0			No matches found	No matches found	No matches found	No matches found	No matches found	No MS2	1.00264e+06
		No results	No results	No results	No results		103.098	0.583	3.59662e+06	0	0			No matches found	No matches found	No matches found	No matches found	No matches found	DDA for preferred ion	3.59662e+06
Choline	C5 H13 N O	Full match	Full match	Partial match	Full match	-2.4	103.099	0.584	8.39388e+07	20	5	70.7	8.5	No matches found	No matches found	Single match found	No matches found	No matches found	DDA for preferred ion	8.39388e+07
Choline	C5 H13 N O	No results	Invalid mass	No results	No results	18.02	103.102	0.585	6.03602e+06	0	5	70.7	8.5	No matches found	No matches found	No matches found	No matches found	No matches found	DDA for preferred ion	6.03602e+06
Tris(hydroxymethyl)aminomethane	C4 H11 N O3	Full match	No results	Full match	No results	-0.76	121.074	0.586	2.96795e+06	3	0			No matches found	No matches found	No matches found	No matches found	No matches found	DDA for preferred ion	2.96795e+06
1,6-Dimethyl-1,6-Dinitroso-Biurea	C4 H8 N6 O4	Full match	No results	Full match	No results	1.11	204.061	0.595	5.81182e+06	2	0			No matches found	No matches found	No matches found	No matches found	No matches found	DDA for preferred ion	5.81182e+06
Trigonelline	C7 H7 N O2	Full match	Full match	Partial match	Partial match	0.16	137.048	0.608	1.81116e+06	87	18	85	53	No matches found	No matches found	Multiple matches found	No matches found	Multiple matches found	DDA for preferred ion	1.81116e+06
DL-Stachydrine	C7 H13 N O2	Full match	Full match	Partial match	Partial match	-0.69	143.095	0.624	1.23372e+06	83	3	76	8.8	No matches found	Single match found	Single match found	Multiple matches found	Multiple matches found	DDA for preferred ion	1.23372e+06
Kynurenic acid	C10 H7 N O3	Full match	Full match	Partial match	Partial match	-0.83	189.042	0.627	4.55361e+06	90	1	94.8	73.2	No matches found	No matches found	Multiple matches found	No matches found	Multiple matches found	DDA for preferred ion	4.55361e+06
1422990	C9 H19 N O2	Full match	No results	Full match	No results	-1	173.141	0.627	3.17913e+06	45	0			No matches found	No matches found	No matches found	No matches found	No matches found	DDA for preferred ion	3.17913e+06
2-Methylpropanamine	C4 H11 N	Full match	No results	Partial match	Full match	-1.64	73.089	0.627	1.25468e+06	10	0			No matches found	No matches found	Single match found	Single match found	No matches found	DDA for preferred ion	1.25468e+06
Buphedrone	C11 H15 N O	Full match	No results	Partial match	Full match	-0.46	177.115	0.628	3.55543e+06	135	0			No matches found	Multiple matches found	No matches found	No matches found	Multiple matches found	No MS2	3.55543e+06
Prolylleucine	C11 H20 N2 O3	Full match	Full match	Not the top hit	Partial match	-0.9	228.147	0.628	1.28958e+06	37	3	84.2	9.2	No matches found	No matches found	Multiple matches found	No matches found	Multiple matches found	DDA for preferred ion	1.28958e+06
1-Methylamino-1-(3,4-Methylenedioxyphenyl)Propane	C11 H15 N O2	No match	No results	Partial match	Full match	-1.27	193.11	0.629	2.29921e+06	218	0			No matches found	Multiple matches found	Single match found	Multiple matches found	Multiple matches found	No MS2	2.29921e+06
Acetonecyanohydrin	C4 H7 N O	Full match	No results	Partial match	Full match	-1.85	85.0526	0.63	2.38162e+07	47	0			No matches found	No matches found	Single match found	No matches found	No matches found	DDA for preferred ion	2.38162e+07
NP-101A	C9 H10 N2 O2	Full match	No results	Partial match	Full match	-1.41	178.074	0.63	1.47524e+07	97	0			No matches found	No matches found	No matches found	No matches found	Single match found	DDA for preferred ion	1.47524e+07
		No results	No results	No results	No results		85.0513	0.63	2.41348e+06	0	0			No matches found	No matches found	No matches found	No matches found	No matches found	DDA for preferred ion	2.41348e+06
Adenine	C5 H5 N5	Full match	Full match	Partial match	Full match	-1.27	135.054	0.63	1.92802e+06	32	1	86.9	54.1	No matches found	No matches found	Single match found	No matches found	No matches found	DDA for preferred ion	1.92802e+06
Ethyltrimethylpyrazine	C9 H14 N2	Full match	No results	Partial match	Full match	-1.05	150.116	0.63	1.19507e+06	50	0			No matches found	No matches found	No matches found	No matches found	Single match found	DDA for preferred ion	1.19507e+06
Acetonecyanohydrin	C4 H7 N O	Full match	No results	Partial match	Full match	-1.85	85.0526	0.893	9.49652e+06	47	0			No matches found	No matches found	Single match found	No matches found	No matches found	DDA for preferred ion	9.49652e+06
2,3-Dihydroxysuccinohydrazide	C4 H10 N4 O4	Full match	No results	Full match	No results	-1.87	178.07	2.912	1.60385e+06	6	0			No matches found	No matches found	No matches found	No matches found	No matches found	DDA for preferred ion	1.60385e+06
NP-101A	C9 H10 N2 O2	Full match	No results	Partial match	Full match	-1.41	178.074	2.914	2.17323e+07	97	0			No matches found	No matches found	No matches found	No matches found	Single match found	DDA for preferred ion	2.17323e+07
Kynurenic acid	C10 H7 N O3	Full match	Full match	Partial match	Partial match	-1.96	189.042	3.196	1.19715e+07	90	4	95.2	74.4	No matches found	No matches found	Multiple matches found	No matches found	Multiple matches found	DDA for preferred ion	1.19715e+07
	C13 H29 F O P2	Full match	No results	No match	No results	-0.09	282.168	3.627	2.08915e+06	1	0			No matches found	No matches found	No matches found	No matches found	No matches found	No MS2	2.08915e+06
Salinaphthoquinone A	C11 H9 N O4	Full match	No results	Partial match	Full match	-0.53	219.053	3.846	1.67844e+06	80	0			No matches found	No matches found	No matches found	No matches found	Multiple matches found	DDA for preferred ion	1.67844e+06
3,6,9,12,15,18-Hexaoxaicosane-1,20-diol	C14 H30 O8	Not the top hit	No results	No match	Full match	-0.44	326.194	3.863	1.67878e+06	13	0			No matches found	No matches found	No matches found	Single match found	No matches found	No MS2	1.67878e+06
	C19 H35 F N3 O2 P	Full match	No results	No match	No results	3.42	387.246	4.068	2.02149e+06	4	0			No matches found	No matches found	No matches found	No matches found	No matches found	No MS2	2.02149e+06
Istamycin C1	C19 H37 N5 O6	Full match	No results	Full match	No results	-3.78	431.273	4.246	2.345e+06	2	0			No matches found	No matches found	No matches found	No matches found	No matches found	No MS2	2.345e+06
Netilmicin	C21 H41 N5 O7	Not the top hit	No results	Full match	Full match	-4.01	475.299	4.405	2.30953e+06	4	0			No matches found	Single match found	No matches found	No matches found	No matches found	No MS2	2.30953e+06
Glidobactin G	C27 H44 N4 O7	Not the top hit	No results	Partial match	Full match	2.34	536.322	4.524	2.37498e+06	2	0			No matches found	No matches found	No matches found	No matches found	Multiple matches found	DDA for preferred ion	2.37498e+06
Skeletocutin P	C29 H44 O9	No match	No results	No match	Full match	2.46	536.3	4.526	3.0092e+07	28	0			No matches found	No matches found	No matches found	No matches found	Single match found	DDA for preferred ion	3.0092e+07
Gageomacrolactin 3	C30 H46 O10	No match	No results	No match	Full match	1.24	566.31	4.549	9.77083e+06	55	0			No matches found	No matches found	No matches found	No matches found	Single match found	DDA for preferred ion	9.77083e+06
	C23 H45 N5 O8	Full match	No results	No match	No results	-1.97	519.326	4.549	1.89836e+06	1	0			No matches found	No matches found	No matches found	No matches found	No matches found	No MS2	1.89836e+06
	C25 H49 N5 O9	Full match	No results	No match	No results	-2.08	563.352	4.678	1.49902e+06	3	0			No matches found	No matches found	No matches found	No matches found	No matches found	No MS2	1.49902e+06
NP-000919	C11 H18 O4	No match	Invalid mass	No match	No match	-84115.1	196.11	4.756	1.25534e+07	66	2	34.3	6.7	No matches found	No matches found	No matches found	No matches found	Multiple matches found	DDA for preferred ion	1.25534e+07
(2R,3S,4S,5S,6R)-2-({7-hydroxy-4-[(3Z)-5-hydroxy-3-methylpent-3-en-1-yl]-4a,8,8-trimethyl-3-methylidene-decahydronaphthalen-2-yl}oxy)-6-(hydroxymethyl)oxane-3,4,5-triol	C26 H44 O8	No match	Invalid mass	No match	No match	45395.2	506.289	4.824	1.75548e+07	36	5	75	8.8	No matches found	No matches found	No matches found	No matches found	Multiple matches found	DDA for preferred ion	1.75548e+07
(2R,3S,4S,5S,6R)-2-({7-hydroxy-4-[(3Z)-5-hydroxy-3-methylpent-3-en-1-yl]-4a,8,8-trimethyl-3-methylidene-decahydronaphthalen-2-yl}oxy)-6-(hydroxymethyl)oxane-3,4,5-triol	C26 H44 O8	No match	Invalid mass	No match	No match	45395.2	506.289	4.898	5.57334e+07	39	4	74.4	8.7	No matches found	No matches found	No matches found	No matches found	Multiple matches found	DDA for preferred ion	5.57334e+07
Amoritin	C31 H38 O6	No match	No results	Partial match	Full match	4.69	506.269	4.901	5.57163e+06	69	0			Multiple matches found	No matches found	No matches found	No matches found	No matches found	DDA for preferred ion	5.57163e+06
	C26 H58 F N5 O12	Full match	No results	No match	No results	-3.28	651.404	4.901	1.36294e+06	7	0			No matches found	No matches found	No matches found	No matches found	No matches found	No MS2	1.36294e+06
(2S,3R)-2-Amino-1,3-dodecanediol	C12 H27 N O2	Full match	No results	Full match	No results	-0.28	217.204	5.669	2.33563e+06	5	0			No matches found	No matches found	No matches found	No matches found	No matches found	No MS2	2.33563e+06
Skeletocutin I	C28 H42 O9	No match	No results	No match	Full match	1.87	522.284	5.974	1.94596e+06	52	0			No matches found	No matches found	No matches found	No matches found	Multiple matches found	DDA for preferred ion	1.94596e+06
10-Nitrolinoleate	C18 H31 N O4	No match	Invalid mass	No match	No match	-55378.8	307.215	6.281	2.44977e+06	93	2	72.6	51.6	No matches found	Multiple matches found	Multiple matches found	No matches found	Multiple matches found	DDA for preferred ion	2.44977e+06
NP-018660	C13 H22 O3	No match	Invalid mass	No match	No match	-79637.7	208.146	6.41	3.64545e+06	86	2	40.3	59.2	No matches found	No matches found	No matches found	Single match found	Multiple matches found	DDA for preferred ion	3.64545e+06
4-hydroxy-6-[2-(2-methyl-1,2,4a,5,6,7,8,8a-octahydronaphthalen-1-yl)ethyl]oxan-2-one	C18 H28 O3	No match	Invalid mass	No match	No match	-61637	274.193	6.521	2.74731e+06	68	8	86.4	70.5	No matches found	No matches found	No matches found	No matches found	Multiple matches found	DDA for preferred ion	2.74731e+06
(11E,15Z)-9,10,13-trihydroxyoctadeca-11,15-dienoic acid	C18 H32 O5	No match	Invalid mass	No match	No results	66972.2	350.207	6.521	1.76811e+06	2	13	99.6	10	No matches found	No matches found	No matches found	No matches found	No matches found	DDA for preferred ion	1.76811e+06
NP-017152	C13 H23 N O2	Full match	Full match	Partial match	Partial match	-0.99	225.173	6.66	4.03778e+06	27	1	39.2	7	No matches found	No matches found	No matches found	Single match found	Multiple matches found	DDA for preferred ion	4.03778e+06
3-(1′-Hydroxypentyl)phenol	C11 H16 O2	Full match	No results	Partial match	Full match	-1.14	180.115	6.773	2.06611e+06	103	0			No matches found	No matches found	No matches found	Single match found	Multiple matches found	DDA for preferred ion	2.06611e+06
Coumarin	C9 H6 O2	Full match	Full match	Not the top hit	Partial match	-0.76	146.037	6.806	2.58542e+06	19	4	61.1	46.4	No matches found	No matches found	Multiple matches found	Single match found	Multiple matches found	DDA for preferred ion	2.58542e+06
5-Hydroxy-7-(hydroxymethyl)-2-methyl-2-(5-oxotetrahydro-2-furanyl)-2,3-dihydro-4H-chromen-4-one	C15 H16 O6	Full match	Full match	Partial match	Full match	-0.23	292.095	6.807	9.83181e+06	157	3	36.2	38.7	No matches found	No matches found	No matches found	No matches found	Multiple matches found	DDA for preferred ion	9.83181e+06
(12Z)-9,10,11-trihydroxyoctadec-12-enoic acid	C18 H34 O5	No match	Invalid mass	No match	No results	66563.3	352.223	6.835	6.815e+06	2	24	99.8	10	No matches found	No matches found	No matches found	No matches found	No matches found	DDA for preferred ion	6.815e+06
(±)13-HpODE	C18 H32 O4	No match	Invalid mass	No match	No match	-57682.9	294.22	6.841	3.74286e+06	74	12	94	81.5	No matches found	No matches found	Multiple matches found	No matches found	Multiple matches found	DDA for preferred ion	3.74286e+06
Palmitoleic Acid	C16 H30 O2	No match	Invalid mass	No match	No match	86475.9	276.209	6.841	2.70295e+06	78	2	77.5	48.6	No matches found	No matches found	Single match found	Single match found	Single match found	DDA for preferred ion	2.70295e+06
NP-001596	C16 H30 O4	No match	Invalid mass	No match	No results	76802.3	308.196	6.875	2.10699e+07	21	18	99.7	10	No matches found	No matches found	No matches found	No matches found	No matches found	DDA for preferred ion	2.10699e+07
Decanophenone	C16 H24 O	Full match	Full match	Partial match	No results	-1.14	232.182	6.875	4.74882e+06	23	2	61.9	42.9	No matches found	No matches found	No matches found	No matches found	No matches found	DDA for preferred ion	4.74882e+06
3-Methyl-1-phenyl-1,2-nonadiene	C16 H22	Full match	No results	Full match	No results	-0.78	214.172	6.875	3.31761e+06	5	0			No matches found	No matches found	No matches found	No matches found	No matches found	DDA for preferred ion	3.31761e+06
OPEO	C16 H26 O2	Full match	Full match	Partial match	Not the top hit	-0.53	250.193	6.876	1.88924e+07	70	4	67.9	43.9	No matches found	No matches found	Multiple matches found	Multiple matches found	Single match found	DDA for preferred ion	1.88924e+07
NP-001596	C16 H30 O4	No match	Invalid mass	No match	No match	-62927.5	268.204	6.876	4.74411e+06	39	3	80.7	50.5	No matches found	No matches found	No matches found	No matches found	Multiple matches found	DDA for preferred ion	4.74411e+06
NP-001596	C16 H30 O4	No match	Invalid mass	No match	No results	132613	324.17	6.876	3.22295e+06	187	1	33.3	6.7	No matches found	No matches found	No matches found	No matches found	No matches found	DDA for preferred ion	3.22295e+06
2-[(3S)-1-(Cyclohexylmethyl)-3-pyrrolidinyl]-1H-benzimidazole-5-carbonitrile	C19 H24 N4	No results	Invalid mass	No match	No results	19.49	308.206	6.876	1.24092e+06	5	3	94.8	9.7	No matches found	No matches found	No matches found	No matches found	No matches found	DDA for preferred ion	1.24092e+06
Tetranor-12R-HETE	C16 H26 O3	No match	Invalid mass	No match	No match	-67661.2	248.178	6.887	2.38607e+06	76	3	74	46.5	No matches found	No matches found	No matches found	Multiple matches found	Multiple matches found	DDA for preferred ion	2.38607e+06
5-Hydroxy-7-(hydroxymethyl)-2-methyl-2-(5-oxotetrahydro-2-furanyl)-2,3-dihydro-4H-chromen-4-one	C15 H16 O6	Full match	Full match	Partial match	Full match	-0.23	292.095	6.942	3.3319e+06	56	2	35.6	38.6	No matches found	No matches found	No matches found	No matches found	Multiple matches found	DDA for preferred ion	3.3319e+06
NP-020214	C16 H32 O4	No match	Invalid mass	No match	No results	76264.6	310.212	6.985	1.38402e+06	6	2	69.8	44.2	No matches found	No matches found	No matches found	No matches found	No matches found	DDA for preferred ion	1.38402e+06
2,6-di-tert-butyl-4-ethylphenol	C16 H26 O	Full match	No results	Full match	Full match	-1.69	234.198	6.986	1.97818e+06	42	0			No matches found	No matches found	No matches found	Single match found	No matches found	DDA for preferred ion	1.97818e+06
Wortmannine F	C16 H28 O2	Full match	No results	Partial match	Full match	-1.41	252.209	6.987	2.91367e+06	71	0			No matches found	No matches found	No matches found	No matches found	Multiple matches found	DDA for preferred ion	2.91367e+06
6-cyclohexyl-5-(cyclohexylimino)-4-thia-6-azaspiro[2.4]heptan-7-one	C17 H26 N2 O S	No match	Invalid mass	No match	No match	-71781.7	284.199	7.011	7.05243e+06	40	3	76.6	8.8	No matches found	No matches found	No matches found	Single match found	Multiple matches found	DDA for preferred ion	7.05243e+06
NP-008563	C16 H28 O4	No match	Invalid mass	No match	No match	-63373.6	266.188	7.017	7.29149e+06	69	4	66.9	47.5	No matches found	No matches found	Multiple matches found	No matches found	Multiple matches found	DDA for preferred ion	7.29149e+06
tetranor-12(R)-HETE	C16 H26 O3	No match	Invalid mass	No match	No match	-67661.2	248.178	7.018	1.84516e+06	76	5	51.4	41.2	No matches found	No matches found	No matches found	Multiple matches found	Multiple matches found	DDA for preferred ion	1.84516e+06
1-[(2-Hydroxyethyl)amino]-2-dodecanol	C14 H31 N O2	Full match	No results	Full match	No results	-0.39	245.235	7.021	8.52285e+06	3	0			No matches found	No matches found	No matches found	No matches found	No matches found	DDA for preferred ion	8.52285e+06
N,N-Dimethyldecylamine N-oxide	C12 H27 N O	Full match	Full match	Full match	No results	-0.25	201.209	7.055	3.20015e+06	5	1	84.2	52.5	No matches found	No matches found	No matches found	No matches found	No matches found	DDA for preferred ion	3.20015e+06
tetradecaphytosphingosine	C14 H31 N O3	Full match	No results	Full match	No results	-0.93	261.23	7.16	3.84802e+06	3	0			No matches found	No matches found	No matches found	No matches found	No matches found	DDA for preferred ion	3.84802e+06
NP-001596	C16 H30 O4	No match	Invalid mass	No match	No results	76803.1	308.197	7.188	3.00775e+06	21	13	99.7	10	No matches found	No matches found	No matches found	No matches found	No matches found	DDA for preferred ion	3.00775e+06
NP-001596	C16 H30 O4	No match	Invalid mass	No match	No match	-62927.5	268.204	7.19	6.6147e+06	39	3	87.9	54.7	No matches found	No matches found	No matches found	No matches found	Multiple matches found	DDA for preferred ion	6.6147e+06
OPEO	C16 H26 O2	Full match	Full match	Partial match	Not the top hit	-0.53	250.193	7.19	3.11784e+06	70	2	65	43.4	No matches found	No matches found	Multiple matches found	Multiple matches found	Single match found	DDA for preferred ion	3.11784e+06
Cyprodenate	C13 H25 N O2	Full match	No results	Full match	No results	0.11	227.189	7.236	6.64035e+06	13	0			No matches found	No matches found	No matches found	No matches found	No matches found	No MS2	6.64035e+06
exo-1,7,7-Trimethylbicyclo(2.2.1)hept-2-yl acrylate	C13 H20 O2	Full match	No results	Partial match	Full match	-0.27	208.146	7.381	1.5396e+06	86	0			No matches found	No matches found	No matches found	Single match found	Multiple matches found	No MS2	1.5396e+06
ML-236C	C18 H26 O3	Full match	No results	Full match	Full match	0.08	290.188	7.427	5.96518e+06	78	0			No matches found	No matches found	No matches found	Single match found	Multiple matches found	DDA for preferred ion	5.96518e+06
Phthalic anhydride	C8 H4 O3	Full match	No results	Full match	Full match	-1.27	148.016	7.52	2.18048e+06	3	0			No matches found	No matches found	No matches found	Single match found	No matches found	No MS2	2.18048e+06
5-(6-hydroxy-6-methyloctyl)-2,5-dihydrofuran-2-one	C13 H22 O3	No match	Invalid mass	No match	No match	-79637.7	208.146	7.692	2.36181e+07	86	6	50.4	62.2	No matches found	No matches found	No matches found	Single match found	Multiple matches found	DDA for preferred ion	2.36181e+07
Bis(methylbenzylidene)sorbitol	C22 H26 O6	Not the top hit	Full match	Partial match	Partial match	-1.29	386.172	7.809	2.46751e+06	334	4	99.4	10	Multiple matches found	No matches found	No matches found	Single match found	Multiple matches found	DDA for preferred ion	2.46751e+06
Tetranor-12(S)-HETE	C16 H26 O3	No match	Invalid mass	No match	No match	82588.8	288.172	7.817	3.18813e+06	80	6	91.3	9.6	No matches found	No matches found	Multiple matches found	No matches found	Multiple matches found	DDA for preferred ion	3.18813e+06
Apigenin 7- (3",6"-di-p-coumarylglucoside)	C39 H32 O14	No match	No results	Partial match	Full match	-0.53	724.179	7.967	2.43189e+06	14	0			Multiple matches found	No matches found	No matches found	No matches found	No matches found	DDA for preferred ion	2.43189e+06
6-O-[(2E)-3-(4-Hydroxyphenyl)-2-propenoyl]-1-O-[(2E)-3-phenyl-2-propenoyl]-β-D-glucopyranose	C24 H24 O9	No match	Invalid mass	No match	No match	-39484.4	438.132	7.968	1.7419e+07	31	5	73.5	8.7	Single match found	No matches found	No matches found	No matches found	Multiple matches found	DDA for preferred ion	1.7419e+07
Coumarin	C9 H6 O2	Full match	Full match	Not the top hit	Partial match	-0.97	146.037	7.969	7.69062e+06	19	8	68.9	47.9	No matches found	No matches found	Multiple matches found	Single match found	Multiple matches found	DDA for preferred ion	7.69062e+06
Coumarin	C9 H6 O2	Full match	Full match	Not the top hit	Partial match	-0.97	146.037	8.017	2.30816e+06	19	4	68.9	47.9	No matches found	No matches found	Multiple matches found	Single match found	Multiple matches found	DDA for preferred ion	2.30816e+06
6-O-[(2E)-3-(4-Hydroxyphenyl)-2-propenoyl]-1-O-[(2E)-3-phenyl-2-propenoyl]-β-D-glucopyranose	C24 H24 O9	No match	Invalid mass	No match	No match	-39484.4	438.132	8.018	3.86106e+06	31	2	73.1	8.7	Single match found	No matches found	No matches found	No matches found	Multiple matches found	DDA for preferred ion	3.86106e+06
Coumarin	C9 H6 O2	Full match	Full match	Not the top hit	Partial match	-0.97	146.037	8.068	1.17941e+06	19	2	60.1	46.3	No matches found	No matches found	Multiple matches found	Single match found	Multiple matches found	DDA for preferred ion	1.17941e+06
6-O-[(2E)-3-(4-Hydroxyphenyl)-2-propenoyl]-1-O-[(2E)-3-phenyl-2-propenoyl]-β-D-glucopyranose	C24 H24 O9	No match	Invalid mass	No match	No match	-39484.4	438.132	8.133	6.71581e+06	31	3	73.4	8.7	Single match found	No matches found	No matches found	No matches found	Multiple matches found	DDA for preferred ion	6.71581e+06
Coumarin	C9 H6 O2	Full match	Full match	Not the top hit	Partial match	-0.97	146.037	8.133	2.58463e+06	19	4	65.5	47.2	No matches found	No matches found	Multiple matches found	Single match found	Multiple matches found	DDA for preferred ion	2.58463e+06
Palmitic Acid	C16 H32 O2	No match	Invalid mass	No match	No match	66447.8	273.267	8.21	5.11358e+07	7	3	81.4	50.9	No matches found	No matches found	No matches found	Single match found	No matches found	DDA for preferred ion	5.11358e+07
		No results	No results	No results	No results		273.259	8.21	2.09204e+06	0	0			No matches found	No matches found	No matches found	No matches found	No matches found	DDA for preferred ion	2.09204e+06
		No results	No results	No results	No results		273.275	8.211	3.57995e+06	0	0			No matches found	No matches found	No matches found	No matches found	No matches found	DDA for preferred ion	3.57995e+06
5-(6-hydroxy-6-methyloctyl)-2,5-dihydrofuran-2-one	C13 H22 O3	No match	Invalid mass	No match	No match	-79637.7	208.146	8.218	4.01372e+06	86	2	43.8	60.3	No matches found	No matches found	No matches found	Single match found	Multiple matches found	DDA for preferred ion	4.01372e+06
Lauryldimethylamine oxide	C14 H31 N O	Full match	No results	Full match	No results	-1.96	229.24	8.254	1.82507e+07	7	0			No matches found	No matches found	No matches found	No matches found	No matches found	DDA for preferred ion	1.82507e+07
Phytosphingosine;D-Ribo-2-amino-1_3_4-Octadecanetriol	C18 H39 N O3	Full match	No results	Partial match	Full match	-0.03	317.293	8.273	1.86835e+06	5	0			No matches found	No matches found	Single match found	No matches found	Single match found	No MS2	1.86835e+06
Palmitic Acid	C16 H32 O2	No match	Invalid mass	No match	No match	66447.8	273.267	8.315	6.56005e+06	7	2	81.3	50.8	No matches found	No matches found	No matches found	Single match found	No matches found	DDA for preferred ion	6.56005e+06
DIHYDROXYETHYL LAURAMINE OXIDE	C16 H35 N O3	Full match	No results	Full match	No results	-1.12	289.261	8.317	1.48097e+07	5	0			No matches found	No matches found	No matches found	No matches found	No matches found	DDA for preferred ion	1.48097e+07
PPG n11	C33 H68 O12	No match	Invalid mass	No results	No results	25936	673.497	8.412	2.35038e+07	0	4	97.5	9.9	No matches found	No matches found	No matches found	No matches found	No matches found	DDA for preferred ion	2.35038e+07
1785113	C16 H33 N O2	Full match	No results	Full match	No results	-1.17	271.251	8.439	1.87166e+06	19	0			No matches found	No matches found	No matches found	No matches found	No matches found	No MS2	1.87166e+06
	C32 H45 F O2 P2	Full match	No results	No match	No results	0.46	542.288	8.478	1.56451e+06	3	0			No matches found	No matches found	No matches found	No matches found	No matches found	DDA for preferred ion	1.56451e+06
Bis(4-ethylbenzylidene)sorbitol	C24 H30 O6	Full match	Full match	Partial match	Partial match	-0.14	414.204	8.513	4.38536e+06	280	3	98.2	9.9	No matches found	Single match found	No matches found	Single match found	Multiple matches found	DDA for preferred ion	4.38536e+06
Hexadecanamide;Palmiticamide	C16 H33 N O	Full match	No results	Partial match	Full match	0.35	255.256	8.584	2.89614e+06	15	0			No matches found	No matches found	Single match found	Single match found	No matches found	No MS2	2.89614e+06
Lauryldimethylamine oxide	C14 H31 N O	Full match	No results	Full match	No results	-1.96	229.24	8.771	2.50533e+06	7	0			No matches found	No matches found	No matches found	No matches found	No matches found	No MS2	2.50533e+06
	C36 H76 F2 N3 O7 P	Full match	No results	No results	No results	0.04	731.539	8.835	1.75717e+07	0	0			No matches found	No matches found	No matches found	No matches found	No matches found	DDA for preferred ion	1.75717e+07
N-(3-Methylbutanoyl)-D-valyl-N-[(3S)-1-{[(2R)-1-{[(2R)-1,2-dihydroxy-5-methyl-3-hexanyl]amino}-1-oxo-2-propanyl]amino}-3-hydroxy-6-methyl-1-oxo-4-heptanyl]-D-valinamide	C33 H63 N5 O8	Full match	No results	Full match	No results	-1.52	657.467	9.077	3.93793e+06	1	0			No matches found	No matches found	No matches found	No matches found	No matches found	DDA for preferred ion	3.93793e+06
Palmitoleic Acid	C16 H30 O2	No match	Invalid mass	No match	No match	86475.9	276.209	9.142	3.33784e+06	78	3	73.2	52.5	No matches found	No matches found	Single match found	Single match found	Single match found	DDA for preferred ion	3.33784e+06
Palmitoleic Acid	C16 H30 O2	No match	Invalid mass	No match	No match	86475.9	276.209	9.214	3.51076e+06	78	3	76.6	57.1	No matches found	No matches found	Single match found	Single match found	Single match found	DDA for preferred ion	3.51076e+06
	C39 H74 F3 N9 O4	Full match	No results	No results	No results	0.01	789.582	9.242	1.00972e+07	0	0			No matches found	No matches found	No matches found	No matches found	No matches found	DDA for preferred ion	1.00972e+07
Sphinganine;2-Amion-1_3-octadecanediol	C18 H39 N O2	Full match	No results	Partial match	Full match	-0.09	301.298	9.356	4.93714e+06	13	0			No matches found	No matches found	Single match found	No matches found	No matches found	DDA for preferred ion	4.93714e+06
NP-004713	C15 H24 O2	No match	Invalid mass	No match	No match	-76259.1	218.167	9.37	2.27935e+06	111	10	67.6	43.8	No matches found	No matches found	Multiple matches found	No matches found	Multiple matches found	DDA for preferred ion	2.27935e+06
4-hydroxy-6-[2-(2-methyl-1,2,4a,5,6,7,8,8a-octahydronaphthalen-1-yl)ethyl]oxan-2-one	C18 H28 O3	No match	Invalid mass	No match	No results	75228.2	314.186	9.371	1.90593e+06	125	8	71.6	8.6	No matches found	No matches found	No matches found	No matches found	No matches found	DDA for preferred ion	1.90593e+06
4-hydroxy-6-[2-(2-methyl-1,2,4a,5,6,7,8,8a-octahydronaphthalen-1-yl)ethyl]oxan-2-one	C18 H28 O3	No match	Invalid mass	No match	No match	-61637	274.193	9.372	1.68657e+06	68	8	80.1	50.1	No matches found	No matches found	No matches found	No matches found	Multiple matches found	DDA for preferred ion	1.68657e+06
4-hydroxy-6-[2-(2-methyl-1,2,4a,5,6,7,8,8a-octahydronaphthalen-1-yl)ethyl]oxan-2-one	C18 H28 O3	No match	Invalid mass	No match	No match	-61637	274.193	9.491	1.56598e+06	68	8	76.7	48.1	No matches found	No matches found	No matches found	No matches found	Multiple matches found	DDA for preferred ion	1.56598e+06
	C32 H58 O7	Full match	No results	No match	No results	-1.09	554.418	9.625	2.70704e+06	1	0			No matches found	No matches found	No matches found	No matches found	No matches found	DDA for preferred ion	2.70704e+06
α-Eleostearic acid	C18 H30 O2	Full match	Full match	Not the top hit	Partial match	-0.93	278.224	9.66	5.37398e+06	111	15	98	81.9	No matches found	No matches found	Multiple matches found	Multiple matches found	Multiple matches found	DDA for preferred ion	5.37398e+06
	C32 H58 O7	Full match	No results	No match	No results	-0.76	554.418	9.698	8.87434e+06	1	0			No matches found	No matches found	No matches found	No matches found	No matches found	DDA for preferred ion	8.87434e+06
α-Eleostearic acid	C18 H30 O2	Full match	Full match	Not the top hit	Partial match	-0.93	278.224	9.719	3.58189e+06	111	10	97.9	81.6	No matches found	No matches found	Multiple matches found	Multiple matches found	Multiple matches found	DDA for preferred ion	3.58189e+06
Palmitoleic Acid	C16 H30 O2	No match	Invalid mass	No match	No match	86475.9	276.209	9.879	1.19374e+07	78	3	80.7	75.7	No matches found	No matches found	Single match found	Single match found	Single match found	DDA for preferred ion	1.19374e+07
Bicyclohexyliden-2-one	C12 H18 O	Full match	No results	Partial match	Full match	-1.23	178.136	9.879	4.27272e+06	70	0			No matches found	No matches found	No matches found	Multiple matches found	Multiple matches found	DDA for preferred ion	4.27272e+06
N-{[(2R,4S,5R)-5-Vinyl-1-azabicyclo[2.2.2]oct-2-yl]methyl}cyclohexanecarboxamide	C17 H28 N2 O	No results	Invalid mass	No results	No results	-12.46	276.217	9.879	1.07921e+06	0	3	51.2	44.6	No matches found	No matches found	No matches found	No matches found	No matches found	DDA for preferred ion	1.07921e+06
Cafestol	C20 H28 O3	No match	Invalid mass	No match	No match	-69526.1	294.219	9.88	1.23516e+07	74	88	93	9.6	No matches found	No matches found	Multiple matches found	No matches found	Multiple matches found	DDA for preferred ion	1.23516e+07
Palmitoleic Acid	C16 H30 O2	No match	Invalid mass	No match	No match	86475.9	276.209	9.951	3.31383e+06	78	3	77	57.6	No matches found	No matches found	Single match found	Single match found	Single match found	DDA for preferred ion	3.31383e+06
(±)13-HpODE	C18 H32 O4	No match	Invalid mass	No match	No match	-57682.9	294.22	9.951	3.01808e+06	74	6	93.4	83.6	No matches found	No matches found	Multiple matches found	No matches found	Multiple matches found	DDA for preferred ion	3.01808e+06
3-Hydroxy-2,2-bis[(nonanoyloxy)methyl]propyl nonanoate	C32 H60 O7	Full match	No results	Full match	No results	-1.57	556.433	9.985	1.59807e+06	1	0			No matches found	No matches found	No matches found	No matches found	No matches found	DDA for preferred ion	1.59807e+06
N-{[(2R,4S,5R)-5-Vinyl-1-azabicyclo[2.2.2]oct-2-yl]methyl}cyclohexanecarboxamide	C17 H28 N2 O	No results	Invalid mass	No results	No results	-12.57	276.217	10.036	1.46938e+06	0	4	46.7	43.8	No matches found	No matches found	No matches found	No matches found	No matches found	DDA for preferred ion	1.46938e+06
Palmitoleic Acid	C16 H30 O2	No match	Invalid mass	No match	No match	86475.9	276.209	10.039	1.57695e+07	78	5	79.2	74.6	No matches found	No matches found	Single match found	Single match found	Single match found	DDA for preferred ion	1.57695e+07
Cafestol	C20 H28 O3	No match	Invalid mass	No match	No match	-69525.8	294.22	10.039	1.06896e+07	74	88	93	9.6	No matches found	No matches found	Multiple matches found	No matches found	Multiple matches found	DDA for preferred ion	1.06896e+07
5α-hydroxy-3,4-seco-lanosta-4(28),8,24-triene-3,21-dioic acid 3-methyl ester	C31 H48 O5	No match	No results	No match	Full match	-4.57	500.348	10.039	1.54883e+06	1	0			No matches found	No matches found	No matches found	No matches found	Multiple matches found	DDA for preferred ion	1.54883e+06
Phthalic anhydride	C8 H4 O3	Full match	No results	Full match	Full match	-1.27	148.016	10.071	2.06894e+06	3	0			No matches found	No matches found	No matches found	Single match found	No matches found	No MS2	2.06894e+06
Phthalic anhydride	C8 H4 O3	Full match	No results	Partial match	Full match	-1.27	148.016	10.145	5.7355e+06	3	0			No matches found	No matches found	No matches found	Single match found	No matches found	DDA for preferred ion	5.7355e+06
Palmitoleic Acid	C16 H30 O2	No match	Invalid mass	No match	No match	86475.9	276.209	10.18	1.52185e+07	78	3	81.7	76.4	No matches found	No matches found	Single match found	Single match found	Single match found	DDA for preferred ion	1.52185e+07
9-Oxo-10(E),12(E)-octadecadienoic acid	C18 H30 O3	Full match	Full match	Full match	Partial match	0.15	294.22	10.18	1.21521e+07	74	12	97.3	89.6	No matches found	No matches found	Multiple matches found	No matches found	Multiple matches found	DDA for preferred ion	1.21521e+07
N-{[(2R,4S,5R)-5-Vinyl-1-azabicyclo[2.2.2]oct-2-yl]methyl}cyclohexanecarboxamide	C17 H28 N2 O	No results	Invalid mass	No results	No results	-12.9	276.217	10.18	1.26023e+06	0	3	50.9	44.6	No matches found	No matches found	No matches found	No matches found	No matches found	DDA for preferred ion	1.26023e+06
Shogaol	C17 H24 O3	Full match	Full match	Full match	Partial match	-0.48	276.172	10.23	1.41161e+06	66	8	75.6	8.8	No matches found	No matches found	No matches found	Single match found	Multiple matches found	DDA for preferred ion	1.41161e+06
Linoleoyl ethanolamide	C20 H37 N O2	Full match	Full match	Full match	No results	-1.05	323.282	10.763	3.17681e+06	8	12	98.1	9.9	No matches found	No matches found	No matches found	No matches found	No matches found	DDA for preferred ion	3.17681e+06
Difenoxin	C28 H28 N2 O2	No match	Invalid mass	No match	No results	-18.28	424.207	10.877	2.82122e+06	7	8	95	9.8	No matches found	No matches found	No matches found	No matches found	No matches found	DDA for preferred ion	2.82122e+06
pheophorbide b	C35 H34 N4 O6	Full match	No results	Full match	No results	-0.07	606.248	11.168	4.2515e+06	16	0			No matches found	No matches found	No matches found	No matches found	No matches found	DDA for preferred ion	4.2515e+06
3,5-dichloro-2'-O-methylnorstenosporic acid	C23 H26 Cl2 O7	No match	No results	No match	Full match	-0.65	484.105	11.295	1.91292e+06	44	0			No matches found	No matches found	No matches found	No matches found	Multiple matches found	No MS2	1.91292e+06
	C13 H12 Cl2 N8 O4	Full match	No results	No match	No results	-0.91	414.035	11.399	7.44031e+06	32	0			No matches found	No matches found	No matches found	No matches found	No matches found	No MS2	7.44031e+06
cis-N-Butyl-4-(4-octylphenyl)cyclohexanamine	C24 H41 N	Full match	No results	Full match	No results	-0.53	343.324	11.42	2.18836e+06	6	0			No matches found	No matches found	No matches found	No matches found	No matches found	DDA for preferred ion	2.18836e+06
Avobenzone	C20 H22 O3	Full match	Full match	Partial match	Partial match	-0.55	310.157	11.516	2.43368e+06	89	2	91	9.6	Single match found	No matches found	No matches found	Single match found	Multiple matches found	DDA for preferred ion	2.43368e+06
Oleoyl ethanolamide	C20 H39 N O2	Full match	Full match	Full match	Full match	-0.55	325.298	11.523	1.70456e+06	17	2	93	66.8	No matches found	No matches found	No matches found	Single match found	Single match found	DDA for preferred ion	1.70456e+06
cis-N-Butyl-4-(4-octylphenyl)cyclohexanamine	C24 H41 N	Full match	No results	Full match	No results	-0.53	343.324	11.625	2.45838e+06	6	0			No matches found	No matches found	No matches found	No matches found	No matches found	DDA for preferred ion	2.45838e+06
	C26 H36 F2 N8 O3 P2	Full match	No results	No match	No results	1.56	608.236	11.861	1.39002e+06	31	0			No matches found	No matches found	No matches found	No matches found	No matches found	DDA for preferred ion	1.39002e+06
NP-010770	C33 H40 N2 O9	No match	Invalid mass	No match	No results	-18.39	608.262	11.862	1.75204e+07	9	8	67.6	43.8	No matches found	No matches found	No matches found	No matches found	No matches found	DDA for preferred ion	1.75204e+07
NP-018915	C28 H46 N4 O11	No match	Invalid mass	No match	No results	35782.6	636.298	11.911	1.63506e+06	1	1	46.3	7.3	No matches found	No matches found	No matches found	No matches found	No matches found	DDA for preferred ion	1.63506e+06
	C28 H52 F6 N3 O P3	Full match	No results	No match	No results	2.89	653.325	11.912	1.87333e+06	17	0			No matches found	No matches found	No matches found	No matches found	No matches found	No MS2	1.87333e+06
Cryptophycin-19	C34 H41 Cl N2 O7	No match	No results	No match	Full match	-3.4	624.258	12.009	9.50315e+06	4	0			No matches found	No matches found	No matches found	No matches found	Multiple matches found	DDA for preferred ion	9.50315e+06
NP-010770	C33 H40 N2 O9	No match	Invalid mass	No match	No results	-18.28	608.262	12.152	3.92688e+07	9	2	62.4	43	No matches found	No matches found	No matches found	No matches found	No matches found	DDA for preferred ion	3.92688e+07
	C32 H35 F2 N4 O4 P	Full match	No results	No match	No results	0.06	608.236	12.153	2.36892e+06	5	0			No matches found	No matches found	No matches found	No matches found	No matches found	DDA for preferred ion	2.36892e+06
Decamethylcyclopentasiloxane	C10 H30 O5 Si5	No results	No results	Full match	Full match	-0.26	370.094	12.275	5.71004e+06	111	0			No matches found	No matches found	No matches found	Single match found	Single match found	DDA for preferred ion	5.71004e+06
N-[(2R)-2,3-Dihydroxypropyl]-5-fluoro-2-[(2-{[4-(4-isopropyl-1-piperazinyl)-2-methoxyphenyl]amino}-1H-pyrrolo[2,3-d]pyrimidin-4-yl)amino]benzamide	C30 H37 F N8 O4	No results	No results	Full match	No results	1.1	592.293	12.362	9.12316e+06	18	0			No matches found	No matches found	No matches found	No matches found	No matches found	DDA for preferred ion	9.12316e+06
	C38 H35 F3 N2 O	Full match	No results	No match	No results	-3.23	592.268	12.363	1.08085e+08	27	0			No matches found	No matches found	No matches found	No matches found	No matches found	DDA for preferred ion	1.08085e+08
Methyl 3-({3-[4-(methoxycarbonyl)-4-phenyl-1-piperidinyl]propyl}carbamoyl)-6-methyl-4-(4-nitrophenyl)-2-oxo-1,2,3,4-tetrahydro-5-pyrimidinecarboxylate	C30 H35 N5 O8	No results	No results	Full match	No results	-0.48	593.248	12.363	2.02071e+06	13	0			No matches found	No matches found	No matches found	No matches found	No matches found	DDA for preferred ion	2.02071e+06
3-[(3S,4S,21R)-14-Ethyl-21-(methoxycarbonyl)-4,8,13,18-tetramethyl-20-oxo-9-vinyl-3-phorbinyl]propanoic acid	C35 H36 N4 O5	Full match	No results	Full match	No results	-0.56	592.268	12.55	3.39604e+07	27	0			No matches found	No matches found	No matches found	No matches found	No matches found	DDA for preferred ion	3.39604e+07
	C20 H46 F2 N10 O2 S3	Full match	No results	No match	No results	-1.19	592.293	12.55	2.58215e+06	18	0			No matches found	No matches found	No matches found	No matches found	No matches found	DDA for preferred ion	2.58215e+06
SB236057A	C33 H34 N4 O3	Full match	Full match	Not the top hit	No match	-0.65	534.263	12.706	1.60862e+07	42	4	73.9	8.7	No matches found	No matches found	No matches found	No matches found	Multiple matches found	DDA for preferred ion	1.60862e+07
5-Olefin phenylpyropene A	C32 H36 O9	Not the top hit	No results	No match	Full match	2.95	564.238	12.717	9.36993e+06	15	0			No matches found	No matches found	No matches found	No matches found	Single match found	DDA for preferred ion	9.36993e+06
(1R,9S)-5-[(E)-2-(4-Chlorophenyl)vinyl]-11-(5-pyrimidinylcarbonyl)-7,11-diazatricyclo[7.3.1.02,7]trideca-2,4-dien-6-one	C24 H21 Cl N4 O2	No match	Invalid mass	No match	No results	87848.2	470.098	12.949	8.23754e+06	62	3	51.7	7.6	No matches found	No matches found	No matches found	No matches found	No matches found	DDA for preferred ion	8.23754e+06
Octyl isothiocyanate	C9 H17 N S	Full match	No results	Full match	No results	-0.35	171.108	12.949	2.24483e+06	5	0			No matches found	No matches found	No matches found	No matches found	No matches found	No MS2	2.24483e+06
N-dodecanoylsphinganine	C30 H61 N O3	Full match	No results	Full match	No results	-1.03	483.465	13.035	1.9262e+06	1	0			No matches found	No matches found	No matches found	No matches found	No matches found	DDA for preferred ion	1.9262e+06
Decamethylcyclopentasiloxane	C10 H30 O5 Si5	No match	No results	No match	Full match	-0.51	370.094	13.092	1.53396e+06	1	0			No matches found	No matches found	No matches found	Single match found	Single match found	No MS2	1.53396e+06
	C27 H47 Cl N O3 P S4	Full match	No results	No match	No results	0.61	627.187	13.093	4.91427e+06	15	0			No matches found	No matches found	No matches found	No matches found	No matches found	No MS2	4.91427e+06
Merocyclophane C	C36 H56 O5	No match	No results	No match	Full match	-4.84	568.41	13.168	1.10108e+06	4	0			No matches found	No matches found	No matches found	No matches found	Multiple matches found	DDA for preferred ion	1.10108e+06
TIPP?	C37 H40 N4 O5	Full match	No results	Full match	No results	0.76	620.3	13.462	3.23163e+06	11	0			No matches found	No matches found	No matches found	No matches found	No matches found	DDA for preferred ion	3.23163e+06
	C37 H28 Cl N5 S	Full match	No results	No match	No results	1.21	609.176	13.469	1.60251e+07	23	0			No matches found	No matches found	No matches found	No matches found	No matches found	DDA for preferred ion	1.60251e+07
Pestalpolyol D	C34 H60 O5	Not the top hit	No results	Partial match	Full match	0.59	548.444	13.63	5.06923e+06	2	0			No matches found	No matches found	No matches found	No matches found	Single match found	DDA for preferred ion	5.06923e+06
Erucamide	C22 H43 N O	Full match	Full match	Full match	Full match	0.53	337.335	13.637	9.53919e+06	16	2	95.3	83.8	No matches found	No matches found	No matches found	Single match found	No matches found	DDA for preferred ion	9.53919e+06
Merocyclophane C	C36 H56 O5	No match	No results	Not the top hit	Full match	-4.2	568.41	13.734	1.56259e+06	17	0			No matches found	No matches found	No matches found	No matches found	Multiple matches found	DDA for preferred ion	1.56259e+06
	C28 H48 Cl N3 O7 S4	Full match	No results	Unused	No results	-0.11	701.206	13.758	6.96735e+06	5	0			No matches found	No matches found	No matches found	No matches found	No matches found	DDA for preferred ion	6.96735e+06
	C39 H80 F3 N O P2 S	Full match	No results	No match	No results	-0.15	729.539	13.781	2.25834e+06	2	0			No matches found	No matches found	No matches found	No matches found	No matches found	DDA for preferred ion	2.25834e+06

## Sheet: EA extract
Table S17: Raw spectral data of E. foeminea ethyl acetate crude extract analyzed using ESI+ LC–MS
Name	Formula	Annot. Source: Predicted Compositions	Annot. Source: mzCloud Search	Annot. Source: ChemSpider Search	Annot. Source: MassList Search	Annot. DeltaMass [ppm]	Calc. MW	RT [min]	Area (Max.)	# ChemSpider Results	# mzCloud Results	mzCloud Best Match	mzCloud Best Match Confidence	Mass List Match: Arita Lab 6549 Flavonoid Structure Database	Mass List Match: EFS HRAM Compound Database	Mass List Match: Endogenous Metabolites database 4400 compounds	Mass List Match: Extractables and Leachables HRAM Compound Database	Mass List Match: Natural Products Atlas 2020_06	MS2	Area: ID_11_EF_EA_LCMS.raw (F12)
	C26 H49 F O	Full match	No results	No match	No results	-3.36	396.375	0.511	975849	5	0			No matches found	No matches found	No matches found	No matches found	No matches found	No MS2	975849
UV6260496	C6 H9 N3	Full match	No results	Full match	No results	-0.89	123.08	0.525	1.1954e+06	50	0			No matches found	No matches found	No matches found	No matches found	No matches found	No MS2	1.1954e+06
DILAURYLMETHYLAMINE	C25 H53 N	Full match	No results	Full match	No results	-0.41	367.418	0.529	1.71441e+06	2	0			No matches found	No matches found	No matches found	No matches found	No matches found	DDA for preferred ion	1.71441e+06
	C6 H11 F3 O4	Full match	No results	No match	No results	-0.89	204.061	0.594	843227	4	0			No matches found	No matches found	No matches found	No matches found	No matches found	DDA for preferred ion	843227
	C9 H17 F3 N4	Full match	No results	No match	No results	4.57	238.142	0.626	1.18098e+06	1	0			No matches found	No matches found	No matches found	No matches found	No matches found	No MS2	1.18098e+06
N-Formylmethamphetamine	C11 H15 N O	Full match	Full match	Partial match	Partial match	-0.46	177.115	0.627	5.20295e+06	135	4	83.6	9.2	No matches found	Multiple matches found	No matches found	No matches found	Multiple matches found	DDA for preferred ion	5.20295e+06
1-Methylamino-1-(3,4-Methylenedioxyphenyl)Propane	C11 H15 N O2	No results	No results	Partial match	Full match	-1.27	193.11	0.627	3.40025e+06	218	0			No matches found	Multiple matches found	Single match found	Multiple matches found	Multiple matches found	No MS2	3.40025e+06
Aflatoxin G2	C17 H14 O7	No match	Invalid mass	No match	No results	-6.17	330.072	0.627	1.83647e+06	1	6	68.2	8.4	No matches found	No matches found	No matches found	No matches found	No matches found	DDA for preferred ion	1.83647e+06
2-Amino-6-({[(2-chlorobenzyl)oxy]carbonyl}amino)hexanoic acid	C14 H19 Cl N2 O4	No match	Invalid mass	No match	No match	-18.7	314.097	0.627	1.5902e+06	37	3	65.4	8.3	No matches found	Single match found	No matches found	No matches found	No matches found	DDA for preferred ion	1.5902e+06
11-Aminoundecanoic acid	C11 H23 N O2	Full match	No results	Full match	No results	-0.73	201.173	0.627	1.17129e+06	17	0			No matches found	No matches found	No matches found	No matches found	No matches found	DDA for preferred ion	1.17129e+06
	C12 H25 F2 N2 O P	Full match	No results	No match	No results	1.5	282.168	0.627	1.10372e+06	1	0			No matches found	No matches found	No matches found	No matches found	No matches found	No MS2	1.10372e+06
Acetonecyanohydrin	C4 H7 N O	Full match	No results	Partial match	Full match	-1.94	85.0526	0.628	3.74734e+07	47	0			No matches found	No matches found	Single match found	No matches found	No matches found	DDA for preferred ion	3.74734e+07
		No results	No results	No results	No results		85.0513	0.628	3.43061e+06	0	0			No matches found	No matches found	No matches found	No matches found	No matches found	DDA for preferred ion	3.43061e+06
Nicotinamide	C6 H6 N2 O	Full match	Full match	Partial match	Full match	-0.56	122.048	0.628	1.43865e+06	50	1	89.9	55.9	No matches found	No matches found	Single match found	No matches found	No matches found	DDA for preferred ion	1.43865e+06
NP-101A	C9 H10 N2 O2	Full match	No results	Partial match	Full match	-1.32	178.074	0.63	5.45195e+06	97	0			No matches found	No matches found	No matches found	No matches found	Single match found	DDA for preferred ion	5.45195e+06
2-Ethyl-2-oxazoline	C5 H9 N O	Full match	No results	Not the top hit	Full match	-1.07	99.0683	0.634	1.72048e+06	63	0			No matches found	No matches found	No matches found	Multiple matches found	No matches found	No MS2	1.72048e+06
Acetonecyanohydrin	C4 H7 N O	Full match	No results	Partial match	Full match	-1.94	85.0526	0.788	2.543e+06	47	0			No matches found	No matches found	Single match found	No matches found	No matches found	DDA for preferred ion	2.543e+06
Acetonecyanohydrin	C4 H7 N O	Full match	No results	Partial match	Full match	-1.94	85.0526	0.887	1.26728e+07	47	0			No matches found	No matches found	Single match found	No matches found	No matches found	DDA for preferred ion	1.26728e+07
NP-101A	C9 H10 N2 O2	Full match	No results	Partial match	Full match	-1.67	178.074	2.914	8.09248e+06	97	0			No matches found	No matches found	No matches found	No matches found	Single match found	DDA for preferred ion	8.09248e+06
MM3670000	C12 H26 O7	Full match	No results	Full match	No results	-0.61	282.168	3.631	1.96991e+06	1	0			No matches found	No matches found	No matches found	No matches found	No matches found	No MS2	1.96991e+06
3,6,9,12,15,18-Hexaoxaicosane-1,20-diol	C14 H30 O8	Full match	No results	Full match	Full match	-0.72	326.194	3.867	1.77651e+06	14	0			No matches found	No matches found	No matches found	Single match found	No matches found	No MS2	1.77651e+06
	C17 H33 N5 O5	Full match	No results	No match	No results	-4.92	387.246	4.072	2.14486e+06	4	0			No matches found	No matches found	No matches found	No matches found	No matches found	No MS2	2.14486e+06
Istamycin C1	C19 H37 N5 O6	Full match	No results	Full match	No results	-3.22	431.273	4.25	2.38451e+06	2	0			No matches found	No matches found	No matches found	No matches found	No matches found	No MS2	2.38451e+06
Netilmicin	C21 H41 N5 O7	Full match	No results	Full match	Full match	-3.75	475.299	4.408	2.43444e+06	4	0			No matches found	Single match found	No matches found	No matches found	No matches found	No MS2	2.43444e+06
	C22 H48 F2 N3 O6 P	Full match	No results	No match	No results	0.94	519.325	4.551	2.29687e+06	1	0			No matches found	No matches found	No matches found	No matches found	No matches found	No MS2	2.29687e+06
	C25 H49 N5 O9	Full match	No results	No match	No results	-2.3	563.352	4.68	1.70806e+06	3	0			No matches found	No matches found	No matches found	No matches found	No matches found	No MS2	1.70806e+06
NP-000919	C11 H18 O4	No match	Invalid mass	No match	No match	-84114.8	196.11	4.723	6.41166e+06	66	1	31.7	6.6	No matches found	No matches found	No matches found	No matches found	Multiple matches found	DDA for preferred ion	6.41166e+06
NP-000919	C11 H18 O4	No match	Invalid mass	No match	No match	-84114.8	196.11	4.813	3.92618e+06	66	1	31.7	6.6	No matches found	No matches found	No matches found	No matches found	Multiple matches found	DDA for preferred ion	3.92618e+06
(2S,3R)-2-Amino-1,3-dodecanediol	C12 H27 N O2	Full match	No results	Full match	No results	-0.49	217.204	5.671	2.6184e+06	5	0			No matches found	No matches found	No matches found	No matches found	No matches found	No MS2	2.6184e+06
NP-018660	C13 H22 O3	No match	Invalid mass	No match	No match	-79637.9	208.146	6.41	3.62479e+06	86	2	40.2	59.2	No matches found	No matches found	No matches found	Single match found	Multiple matches found	DDA for preferred ion	3.62479e+06
NP-017152	C13 H23 N O2	Full match	Full match	Partial match	Partial match	-0.99	225.173	6.659	4.03879e+06	27	1	36.3	6.8	No matches found	No matches found	No matches found	Single match found	Multiple matches found	DDA for preferred ion	4.03879e+06
3-(1′-Hydroxypentyl)phenol	C11 H16 O2	Full match	No results	Partial match	Full match	-1.23	180.115	6.774	1.89621e+06	103	0			No matches found	No matches found	No matches found	Single match found	Multiple matches found	DDA for preferred ion	1.89621e+06
Coumarin	C9 H6 O2	Full match	Full match	Not the top hit	Partial match	-0.86	146.037	6.806	2.10773e+06	19	4	65.1	47.2	No matches found	No matches found	Multiple matches found	Single match found	Multiple matches found	DDA for preferred ion	2.10773e+06
5-Hydroxy-7-(hydroxymethyl)-2-methyl-2-(5-oxotetrahydro-2-furanyl)-2,3-dihydro-4H-chromen-4-one	C15 H16 O6	Not the top hit	Full match	Partial match	Full match	-0.44	292.095	6.807	8.39459e+06	56	3	36	38.7	No matches found	No matches found	No matches found	No matches found	Multiple matches found	DDA for preferred ion	8.39459e+06
(12Z)-9,10,11-trihydroxyoctadec-12-enoic acid	C18 H34 O5	No match	Invalid mass	No match	No results	66563.5	352.223	6.831	3.2089e+06	2	18	99.8	10	No matches found	No matches found	No matches found	No matches found	No matches found	DDA for preferred ion	3.2089e+06
NP-001596	C16 H30 O4	No match	Invalid mass	No match	No results	76802.6	308.196	6.874	1.63973e+07	21	24	99.6	10	No matches found	No matches found	No matches found	No matches found	No matches found	DDA for preferred ion	1.63973e+07
Decanophenone	C16 H24 O	Full match	Full match	Partial match	No results	-0.22	232.183	6.874	3.4918e+06	23	2	60	46.2	No matches found	No matches found	No matches found	No matches found	No matches found	DDA for preferred ion	3.4918e+06
	C16 H24 F4 O2	Full match	No results	No match	No results	-3.08	324.17	6.874	2.50695e+06	1	0			No matches found	No matches found	No matches found	No matches found	No matches found	DDA for preferred ion	2.50695e+06
OPEO	C16 H26 O2	Full match	Full match	Partial match	Not the top hit	-0.1	250.193	6.875	1.41792e+07	70	4	68.4	47.8	No matches found	No matches found	Multiple matches found	Multiple matches found	Single match found	DDA for preferred ion	1.41792e+07
NP-001596	C16 H30 O4	No match	Invalid mass	No match	No match	-62927.3	268.204	6.875	3.42683e+06	39	2	77	48.3	No matches found	No matches found	No matches found	No matches found	Multiple matches found	DDA for preferred ion	3.42683e+06
1-Ethynyl-4-octylbenzene	C16 H22	Full match	No results	Full match	No results	-0.42	214.172	6.875	2.50419e+06	5	0			No matches found	No matches found	No matches found	No matches found	No matches found	No MS2	2.50419e+06
5-Hydroxy-7-(hydroxymethyl)-2-methyl-2-(5-oxotetrahydro-2-furanyl)-2,3-dihydro-4H-chromen-4-one	C15 H16 O6	Full match	Full match	Partial match	Full match	-0.44	292.095	6.942	3.06186e+06	56	2	35.9	38.7	No matches found	No matches found	No matches found	No matches found	Multiple matches found	DDA for preferred ion	3.06186e+06
Hexadeca-5,9-dienoic acid	C16 H28 O2	Full match	No results	Partial match	Full match	-1.35	252.209	6.986	1.99842e+06	71	0			No matches found	No matches found	No matches found	No matches found	Multiple matches found	DDA for preferred ion	1.99842e+06
6-cyclohexyl-5-(cyclohexylimino)-4-thia-6-azaspiro[2.4]heptan-7-one	C17 H26 N2 O S	No match	Invalid mass	No match	No match	-71781.9	284.199	7.012	5.19535e+06	40	2	76.6	8.8	No matches found	No matches found	No matches found	Single match found	Multiple matches found	DDA for preferred ion	5.19535e+06
NP-008563	C16 H28 O4	No match	Invalid mass	No match	No match	-63373.4	266.188	7.017	6.03057e+06	69	4	67.2	47.6	No matches found	No matches found	Multiple matches found	No matches found	Multiple matches found	DDA for preferred ion	6.03057e+06
1-[(2-Hydroxyethyl)amino]-2-dodecanol	C14 H31 N O2	Full match	No results	Full match	No results	0.05	245.235	7.021	8.93426e+06	3	0			No matches found	No matches found	No matches found	No matches found	No matches found	DDA for preferred ion	8.93426e+06
N,N-Dimethyldecylamine N-oxide	C12 H27 N O	Full match	Full match	Full match	No results	-0.17	201.209	7.055	3.44289e+06	5	1	80.6	50.4	No matches found	No matches found	No matches found	No matches found	No matches found	DDA for preferred ion	3.44289e+06
2,2,6,6-Tetramethyl-4-piperidinol	C9 H19 N O	Full match	No results	Full match	Full match	-0.94	157.147	7.07	2.09564e+06	48	0			No matches found	No matches found	No matches found	Multiple matches found	No matches found	No MS2	2.09564e+06
tetradecaphytosphingosine	C14 H31 N O3	Full match	No results	Full match	No results	-0.82	261.23	7.162	3.79789e+06	3	0			No matches found	No matches found	No matches found	No matches found	No matches found	DDA for preferred ion	3.79789e+06
NP-001596	C16 H30 O4	No match	Invalid mass	No match	No match	-62927.3	268.204	7.19	4.97368e+06	39	3	87.1	54.2	No matches found	No matches found	No matches found	No matches found	Multiple matches found	DDA for preferred ion	4.97368e+06
OPEO	C16 H26 O2	Full match	Full match	Partial match	Not the top hit	-0.1	250.193	7.19	2.39877e+06	70	2	60.6	8	No matches found	No matches found	Multiple matches found	Multiple matches found	Single match found	DDA for preferred ion	2.39877e+06
NP-001596	C16 H30 O4	No match	Invalid mass	No match	No results	76803.4	308.197	7.19	1.46677e+06	21	13	99.7	10	No matches found	No matches found	No matches found	No matches found	No matches found	DDA for preferred ion	1.46677e+06
Cyprodenate	C13 H25 N O2	Full match	No results	Full match	No results	-0.16	227.188	7.24	7.68072e+06	13	0			No matches found	No matches found	No matches found	No matches found	No matches found	No MS2	7.68072e+06
exo-1,7,7-Trimethylbicyclo(2.2.1)hept-2-yl acrylate	C13 H20 O2	Full match	No results	Partial match	Full match	-0.42	208.146	7.381	1.63603e+06	86	0			No matches found	No matches found	No matches found	Single match found	Multiple matches found	No MS2	1.63603e+06
ML-236C	C18 H26 O3	Full match	No results	Full match	Full match	-0.13	290.188	7.426	3.94648e+06	78	0			No matches found	No matches found	No matches found	Single match found	Multiple matches found	DDA for preferred ion	3.94648e+06
Phthalic anhydride	C8 H4 O3	Full match	No results	Full match	Full match	-1.79	148.016	7.518	1.93643e+06	3	0			No matches found	No matches found	No matches found	Single match found	No matches found	No MS2	1.93643e+06
5-(6-hydroxy-6-methyloctyl)-2,5-dihydrofuran-2-one	C13 H22 O3	No match	Invalid mass	No match	No match	-79637.9	208.146	7.69	2.69896e+07	86	6	50.6	62.3	No matches found	No matches found	No matches found	Single match found	Multiple matches found	DDA for preferred ion	2.69896e+07
Bis(methylbenzylidene)sorbitol	C22 H26 O6	Full match	Full match	Partial match	Partial match	-1.02	386.173	7.809	3.6488e+07	334	6	99.5	10	Multiple matches found	No matches found	No matches found	Single match found	Multiple matches found	DDA for preferred ion	3.6488e+07
F1839-B	C24 H33 N O6	Not the top hit	No results	Partial match	Full match	-0.49	431.231	7.809	1.19229e+07	149	0			No matches found	No matches found	No matches found	No matches found	Multiple matches found	DDA for preferred ion	1.19229e+07
Styrene	C8 H8	Full match	No results	Partial match	Full match	-0.8	104.063	7.809	4.62959e+06	10	0			No matches found	No matches found	No matches found	Single match found	Single match found	DDA for preferred ion	4.62959e+06
Macrosphelide K	C18 H26 O9	No match	No results	No match	Full match	4.16	386.159	7.809	2.39e+06	74	0			No matches found	No matches found	No matches found	No matches found	Single match found	DDA for preferred ion	2.39e+06
Aculin B	C26 H35 N O7	No match	No results	No match	Full match	-0.84	473.241	7.809	1.56534e+06	1	0			No matches found	No matches found	No matches found	No matches found	Multiple matches found	DDA for preferred ion	1.56534e+06
4-oxododecanedioic acid	C12 H20 O5	No match	Invalid mass	No match	No match	90051.1	266.115	7.809	1.46572e+06	58	3	42.3	7.1	No matches found	No matches found	No matches found	No matches found	Multiple matches found	DDA for preferred ion	1.46572e+06
JBIR-94	C24 H32 N2 O6	No match	No results	Not the top hit	Full match	-0.15	444.226	7.81	2.26179e+06	164	0			No matches found	No matches found	No matches found	No matches found	Single match found	DDA for preferred ion	2.26179e+06
Estriol	C18 H24 O3	Full match	Full match	Full match	Partial match	-0.36	288.172	7.817	2.14682e+06	80	3	57	64.1	No matches found	No matches found	Multiple matches found	No matches found	Multiple matches found	DDA for preferred ion	2.14682e+06
6-O-[(2E)-3-(4-Hydroxyphenyl)-2-propenoyl]-1-O-[(2E)-3-phenyl-2-propenoyl]-β-D-glucopyranose	C24 H24 O9	No match	Invalid mass	No match	No match	-39484.6	438.131	7.967	1.32354e+07	31	4	73.8	8.7	Single match found	No matches found	No matches found	No matches found	Multiple matches found	DDA for preferred ion	1.32354e+07
Coumarin	C9 H6 O2	Full match	Full match	Not the top hit	Partial match	-0.97	146.037	7.967	5.72575e+06	19	10	69	47.9	No matches found	No matches found	Multiple matches found	Single match found	Multiple matches found	DDA for preferred ion	5.72575e+06
6-O-[(2E)-3-(4-Hydroxyphenyl)-2-propenoyl]-1-O-[(2E)-3-phenyl-2-propenoyl]-β-D-glucopyranose	C24 H24 O9	No match	Invalid mass	No match	No match	-39484.6	438.131	8.015	3.32003e+06	31	2	73.8	8.7	Single match found	No matches found	No matches found	No matches found	Multiple matches found	DDA for preferred ion	3.32003e+06
(11E,15Z)-9,10,13-trihydroxyoctadeca-11,15-dienoic acid	C18 H32 O5	No match	Invalid mass	No match	No results	66972.5	350.207	8.018	1.96362e+06	2	13	99.6	10	No matches found	No matches found	No matches found	No matches found	No matches found	DDA for preferred ion	1.96362e+06
Coumarin	C9 H6 O2	Full match	Full match	Not the top hit	Partial match	-0.97	146.037	8.018	1.93687e+06	19	6	66.5	47.4	No matches found	No matches found	Multiple matches found	Single match found	Multiple matches found	DDA for preferred ion	1.93687e+06
Coumarin	C9 H6 O2	Full match	Full match	Not the top hit	Partial match	-0.97	146.037	8.067	1.16313e+06	19	4	63.4	46.9	No matches found	No matches found	Multiple matches found	Single match found	Multiple matches found	DDA for preferred ion	1.16313e+06
6-O-[(2E)-3-(4-Hydroxyphenyl)-2-propenoyl]-1-O-[(2E)-3-phenyl-2-propenoyl]-β-D-glucopyranose	C24 H24 O9	No match	Invalid mass	No match	No match	-39484.6	438.131	8.133	5.81218e+06	31	3	74.6	8.7	Single match found	No matches found	No matches found	No matches found	Multiple matches found	DDA for preferred ion	5.81218e+06
Coumarin	C9 H6 O2	Full match	Full match	Not the top hit	Partial match	-0.97	146.037	8.135	1.93091e+06	19	4	64.9	47.1	No matches found	No matches found	Multiple matches found	Single match found	Multiple matches found	DDA for preferred ion	1.93091e+06
		No results	No results	No results	No results		273.275	8.207	3.78914e+06	0	0			No matches found	No matches found	No matches found	No matches found	No matches found	DDA for preferred ion	3.78914e+06
Palmitic Acid	C16 H32 O2	No match	Invalid mass	No match	No match	66447.2	273.267	8.208	5.33628e+07	7	2	83.1	51.9	No matches found	No matches found	No matches found	Single match found	No matches found	DDA for preferred ion	5.33628e+07
		No results	No results	No results	No results		273.258	8.211	2.14262e+06	0	0			No matches found	No matches found	No matches found	No matches found	No matches found	DDA for preferred ion	2.14262e+06
5-(6-hydroxy-6-methyloctyl)-2,5-dihydrofuran-2-one	C13 H22 O3	No match	Invalid mass	No match	No match	-79637.9	208.146	8.217	3.85659e+06	86	2	44	60.3	No matches found	No matches found	No matches found	Single match found	Multiple matches found	DDA for preferred ion	3.85659e+06
Lauryldimethylamine oxide	C14 H31 N O	Full match	No results	Full match	No results	-1.3	229.24	8.256	1.64136e+07	7	0			No matches found	No matches found	No matches found	No matches found	No matches found	DDA for preferred ion	1.64136e+07
Phytosphingosine;D-Ribo-2-amino-1_3_4-Octadecanetriol	C18 H39 N O3	Full match	No results	Partial match	Full match	0.74	317.293	8.275	1.90174e+06	5	0			No matches found	No matches found	Single match found	No matches found	Single match found	No MS2	1.90174e+06
NP-002322	C18 H32 O4	No match	Invalid mass	No match	No match	-57684.1	294.219	8.302	2.23721e+06	74	12	80.7	50.5	No matches found	No matches found	Multiple matches found	No matches found	Multiple matches found	DDA for preferred ion	2.23721e+06
DIHYDROXYETHYL LAURAMINE OXIDE	C16 H35 N O3	Full match	No results	Full match	No results	-1.44	289.261	8.317	1.45164e+07	5	0			No matches found	No matches found	No matches found	No matches found	No matches found	DDA for preferred ion	1.45164e+07
1785113	C16 H33 N O2	Full match	No results	Full match	No results	-1.17	271.251	8.442	1.81648e+06	19	0			No matches found	No matches found	No matches found	No matches found	No matches found	No MS2	1.81648e+06
Ethyl hydrogen [(1s,4s)-dispiro[cyclohexane-1,3'-[1,2,4]trioxolane-5',2''-tricyclo[3.3.1.1~3,7~]decan]-4-ylmethyl]phosphonate	C19 H31 O6 P	Full match	No results	Full match	No results	-0.99	386.185	8.465	2.28198e+06	4	0			No matches found	No matches found	No matches found	No matches found	No matches found	DDA for preferred ion	2.28198e+06
Eplerenone	C24 H30 O6	Full match	No results	Partial match	Full match	-0.95	414.204	8.512	4.25491e+06	280	0			No matches found	Single match found	No matches found	Single match found	Multiple matches found	No MS2	4.25491e+06
Hexadecanamide;Palmiticamide	C16 H33 N O	Full match	No results	Partial match	Full match	-0.37	255.256	8.584	2.92618e+06	15	0			No matches found	No matches found	Single match found	Single match found	No matches found	No MS2	2.92618e+06
Lauryldimethylamine oxide	C14 H31 N O	Full match	No results	Full match	No results	-1.3	229.24	8.774	2.40894e+06	7	0			No matches found	No matches found	No matches found	No matches found	No matches found	No MS2	2.40894e+06
Palmitoleic Acid	C16 H30 O2	No match	Invalid mass	No match	No match	86475.7	276.209	9.143	2.13814e+06	78	3	72.5	51.5	No matches found	No matches found	Single match found	Single match found	Single match found	DDA for preferred ion	2.13814e+06
Palmitoleic Acid	C16 H30 O2	No match	Invalid mass	No match	No match	86475.7	276.209	9.214	2.60867e+06	78	2	74.8	54.6	No matches found	No matches found	Single match found	Single match found	Single match found	DDA for preferred ion	2.60867e+06
Sphinganine;2-Amion-1_3-octadecanediol	C18 H39 N O2	Full match	No results	Partial match	Full match	-0.9	301.298	9.359	4.80312e+06	13	0			No matches found	No matches found	Single match found	No matches found	No matches found	DDA for preferred ion	4.80312e+06
NP-004713	C15 H24 O2	No match	Invalid mass	No match	No match	-76258.9	218.167	9.37	1.56347e+06	111	10	66.7	43.7	No matches found	No matches found	Multiple matches found	No matches found	Multiple matches found	DDA for preferred ion	1.56347e+06
4-hydroxy-6-[2-(2-methyl-1,2,4a,5,6,7,8,8a-octahydronaphthalen-1-yl)ethyl]oxan-2-one	C18 H28 O3	No match	Invalid mass	No match	No results	75228.3	314.186	9.371	1.31354e+06	124	16	93	9.7	No matches found	No matches found	No matches found	No matches found	No matches found	DDA for preferred ion	1.31354e+06
	C32 H58 O7	Full match	No results	No match	No results	-1.64	554.417	9.625	1.57248e+06	1	0			No matches found	No matches found	No matches found	No matches found	No matches found	DDA for preferred ion	1.57248e+06
α-Linolenic acid	C18 H30 O2	Not the top hit	Full match	Full match	Full match	-0.27	278.224	9.66	3.80748e+06	111	10	97.7	9.9	No matches found	No matches found	Multiple matches found	Multiple matches found	Multiple matches found	DDA for preferred ion	3.80748e+06
	C33 H56 F2 O4	Invalid mass	No results	No match	No results	5.19	554.418	9.699	5.88727e+06	1	0			No matches found	No matches found	No matches found	No matches found	No matches found	DDA for preferred ion	5.88727e+06
NP-020521	C18 H32 O3	No match	Invalid mass	No match	No match	-60798.5	278.224	9.718	3.09922e+06	111	5	97.6	80.8	No matches found	No matches found	Multiple matches found	Multiple matches found	Multiple matches found	DDA for preferred ion	3.09922e+06
Palmitoleic Acid	C16 H30 O2	No match	Invalid mass	No match	No match	86475.7	276.209	9.879	8.91478e+06	78	3	80	75.2	No matches found	No matches found	Single match found	Single match found	Single match found	DDA for preferred ion	8.91478e+06
Bicyclohexyliden-2-one	C12 H18 O	Full match	No results	Partial match	Full match	-1.06	178.136	9.879	3.17115e+06	70	0			No matches found	No matches found	No matches found	Multiple matches found	Multiple matches found	DDA for preferred ion	3.17115e+06
Cafestol	C20 H28 O3	No match	Invalid mass	No match	No match	-8.21	316.201	9.88	7.65761e+06	78	88	93	9.6	No matches found	No matches found	No matches found	No matches found	Single match found	DDA for preferred ion	7.65761e+06
(±)13-HpODE	C18 H32 O4	No match	Invalid mass	No match	No match	-57684.1	294.219	9.88	1.71441e+06	74	12	86.8	80.1	No matches found	No matches found	Multiple matches found	No matches found	Multiple matches found	DDA for preferred ion	1.71441e+06
Palmitoleic Acid	C16 H30 O2	No match	Invalid mass	No match	No match	86475.7	276.209	9.951	2.598e+06	78	3	78.2	59.3	No matches found	No matches found	Single match found	Single match found	Single match found	DDA for preferred ion	2.598e+06
(±)13-HpODE	C18 H32 O4	No match	Invalid mass	No match	No match	-57684.1	294.219	9.951	1.91053e+06	74	6	91.4	82.9	No matches found	No matches found	Multiple matches found	No matches found	Multiple matches found	DDA for preferred ion	1.91053e+06
Palmitoleic Acid	C16 H30 O2	No match	Invalid mass	No match	No match	86475.7	276.209	10.038	1.13825e+07	78	3	78.8	74.3	No matches found	No matches found	Single match found	Single match found	Single match found	DDA for preferred ion	1.13825e+07
N-{[(2R,4S,5R)-5-Vinyl-1-azabicyclo[2.2.2]oct-2-yl]methyl}cyclohexanecarboxamide	C17 H28 N2 O	No results	Invalid mass	No results	No results	-12.46	276.217	10.038	1.02763e+06	0	3	45.4	43.6	No matches found	No matches found	No matches found	No matches found	No matches found	DDA for preferred ion	1.02763e+06
Cafestol	C20 H28 O3	No match	Invalid mass	No match	No match	-69526.4	294.219	10.039	7.29971e+06	74	66	92.7	9.6	No matches found	No matches found	Multiple matches found	No matches found	Multiple matches found	DDA for preferred ion	7.29971e+06
Phthalic anhydride	C8 H4 O3	Full match	No results	Partial match	Full match	-1.79	148.016	10.069	2.05515e+06	3	0			No matches found	No matches found	No matches found	Single match found	No matches found	DDA for preferred ion	2.05515e+06
Phthalic anhydride	C8 H4 O3	Full match	No results	Partial match	Full match	-1.79	148.016	10.143	4.64821e+06	3	0			No matches found	No matches found	No matches found	Single match found	No matches found	DDA for preferred ion	4.64821e+06
N-{[(2R,4S,5R)-5-Vinyl-1-azabicyclo[2.2.2]oct-2-yl]methyl}cyclohexanecarboxamide	C17 H28 N2 O	No results	Invalid mass	No results	No results	-12.57	276.217	10.177	1.09683e+06	0	2	50.5	44.5	No matches found	No matches found	No matches found	No matches found	No matches found	DDA for preferred ion	1.09683e+06
9-Oxo-10(E),12(E)-octadecadienoic acid	C18 H30 O3	Full match	Full match	Full match	Partial match	-0.56	294.219	10.179	9.01384e+06	74	18	97.4	95.6	No matches found	No matches found	Multiple matches found	No matches found	Multiple matches found	DDA for preferred ion	9.01384e+06
Palmitoleic Acid	C16 H30 O2	No match	Invalid mass	No match	No match	86475.7	276.209	10.18	1.17657e+07	78	2	80.7	75.7	No matches found	No matches found	Single match found	Single match found	Single match found	DDA for preferred ion	1.17657e+07
Linoleoyl ethanolamide	C20 H37 N O2	Full match	Full match	Full match	No results	-1.33	323.282	10.762	2.7655e+06	8	12	97.8	9.9	No matches found	No matches found	No matches found	No matches found	No matches found	DDA for preferred ion	2.7655e+06
	C17 H32 N2 O10	Full match	No results	No match	No results	4.05	424.207	10.878	1.95804e+06	1	0			No matches found	No matches found	No matches found	No matches found	No matches found	No MS2	1.95804e+06
pheophorbide b	C35 H34 N4 O6	Full match	No results	Full match	No results	-0.58	606.247	11.168	4.49879e+06	5	0			No matches found	No matches found	No matches found	No matches found	No matches found	DDA for preferred ion	4.49879e+06
3,5-dichloro-2'-O-methylnorstenosporic acid	C23 H26 Cl2 O7	No match	No results	No match	Full match	-0.84	484.105	11.295	2.12063e+06	47	0			No matches found	No matches found	No matches found	No matches found	Multiple matches found	No MS2	2.12063e+06
	C13 H12 Cl2 N8 O4	Full match	No results	No match	No results	-1.28	414.035	11.4	8.43307e+06	31	0			No matches found	No matches found	No matches found	No matches found	No matches found	No MS2	8.43307e+06
Oleoyl ethanolamide	C20 H39 N O2	Full match	Full match	Full match	Full match	-1.21	325.298	11.523	1.44115e+06	17	2	93.3	9.7	No matches found	No matches found	No matches found	Single match found	Single match found	DDA for preferred ion	1.44115e+06
	C24 H41 F2 N6 O4 P3	Full match	No results	No match	No results	-1.16	608.236	11.86	1.37142e+06	31	0			No matches found	No matches found	No matches found	No matches found	No matches found	DDA for preferred ion	1.37142e+06
NP-010770	C33 H40 N2 O9	No match	Invalid mass	No match	No results	-18.09	608.262	11.861	1.68444e+07	7	6	68.5	67.5	No matches found	No matches found	No matches found	No matches found	No matches found	DDA for preferred ion	1.68444e+07
NP-018915	C28 H46 N4 O11	No match	Invalid mass	No match	No match	35781.4	636.297	11.91	1.22523e+07	1	1	30.1	6.5	No matches found	No matches found	No matches found	No matches found	Single match found	DDA for preferred ion	1.22523e+07
	C32 H49 F N3 O8 P	Full match	No results	No match	No results	-0.07	653.324	11.911	1.10439e+07	23	0			No matches found	No matches found	No matches found	No matches found	No matches found	DDA for preferred ion	1.10439e+07
	C36 H55 O11 P	Full match	No results	No match	No results	1.84	694.349	11.911	3.30436e+06	18	0			No matches found	No matches found	No matches found	No matches found	No matches found	No MS2	3.30436e+06
Cryptophycin-19	C34 H41 Cl N2 O7	No match	No results	No match	Full match	-3.5	624.258	12.009	8.3467e+06	4	0			No matches found	No matches found	No matches found	No matches found	Multiple matches found	DDA for preferred ion	8.3467e+06
NP-010770	C33 H40 N2 O9	No match	Invalid mass	No match	No results	-18.03	608.262	12.152	5.40877e+07	7	4	64.9	43.4	No matches found	No matches found	No matches found	No matches found	No matches found	DDA for preferred ion	5.40877e+07
	C19 H41 F6 N6 O3 P3	Full match	No results	No match	No results	1.48	608.237	12.154	4.8431e+06	32	0			No matches found	No matches found	No matches found	No matches found	No matches found	DDA for preferred ion	4.8431e+06
Decamethylcyclopentasiloxane	C10 H30 O5 Si5	No results	No results	Full match	Full match	-0.84	370.094	12.275	6.00694e+06	112	0			No matches found	No matches found	No matches found	Single match found	Single match found	DDA for preferred ion	6.00694e+06
	C21 H39 F6 N10 O P	Full match	No results	No match	No results	-3.78	592.293	12.363	1.05898e+07	18	0			No matches found	No matches found	No matches found	No matches found	No matches found	DDA for preferred ion	1.05898e+07
3-[(3S,4S,21R)-14-Ethyl-21-(methoxycarbonyl)-4,8,13,18-tetramethyl-20-oxo-9-vinyl-3-phorbinyl]propanoic acid	C35 H36 N4 O5	Full match	No results	Full match	No results	-0.79	592.268	12.367	1.19913e+08	33	0			No matches found	No matches found	No matches found	No matches found	No matches found	DDA for preferred ion	1.19913e+08
2-(Allyl{4-[(2-ethyl-5,7-dimethyl-3H-imidazo[4,5-b]pyridin-3-yl)methyl]phenyl}amino)-2-phenyl-N-(phenylsulfonyl)acetamide	C34 H35 N5 O3 S	No results	No results	Full match	No results	4.25	593.249	12.367	2.1603e+06	13	0			No matches found	No matches found	No matches found	No matches found	No matches found	DDA for preferred ion	2.1603e+06
	C35 H36 N4 O5	Full match	No results	No match	No results	-0.77	592.268	12.549	3.02643e+07	33	0			No matches found	No matches found	No matches found	No matches found	No matches found	DDA for preferred ion	3.02643e+07
	C20 H44 N6 O14	Full match	No results	No match	No results	2.06	592.293	12.549	2.56116e+06	18	0			No matches found	No matches found	No matches found	No matches found	No matches found	DDA for preferred ion	2.56116e+06
SB236057A	C33 H34 N4 O3	Full match	Full match	Not the top hit	No match	-0.77	534.263	12.704	1.5087e+07	66	3	73.4	46.2	No matches found	No matches found	No matches found	No matches found	Multiple matches found	DDA for preferred ion	1.5087e+07
5-Olefin phenylpyropene A	C32 H36 O9	Not the top hit	No results	Not the top hit	Full match	2.3	564.237	12.715	9.58067e+06	20	0			No matches found	No matches found	No matches found	No matches found	Single match found	DDA for preferred ion	9.58067e+06
(1R,9S)-5-[(E)-2-(4-Chlorophenyl)vinyl]-11-(5-pyrimidinylcarbonyl)-7,11-diazatricyclo[7.3.1.02,7]trideca-2,4-dien-6-one	C24 H21 Cl N4 O2	No match	Invalid mass	No match	No results	87847.5	470.097	12.948	9.94029e+06	61	3	57.3	7.9	No matches found	No matches found	No matches found	No matches found	No matches found	DDA for preferred ion	9.94029e+06
Octyl isothiocyanate	C9 H17 N S	Full match	No results	Full match	No results	-0.88	171.108	12.948	2.27688e+06	5	0			No matches found	No matches found	No matches found	No matches found	No matches found	No MS2	2.27688e+06
N-{4-[4-(4-Chlorophenyl)-1-piperazinyl]benzyl}-2-(dibenzo[b,d]thiophen-2-yl)imidazo[1,2-a]pyridine-3-carboxamide	C37 H30 Cl N5 O S	Full match	No results	Full match	No results	0.98	627.187	13.092	5.46572e+06	1	0			No matches found	No matches found	No matches found	No matches found	No matches found	DDA for preferred ion	5.46572e+06
Decamethylcyclopentasiloxane	C10 H30 O5 Si5	Unused	No results	Full match	Full match	-0.84	370.094	13.092	1.69781e+06	112	0			No matches found	No matches found	No matches found	Single match found	Single match found	No MS2	1.69781e+06
Pestalpolyol D	C34 H60 O5	Not the top hit	No results	Partial match	Full match	0.02	548.444	13.632	4.29637e+06	2	0			No matches found	No matches found	No matches found	No matches found	Single match found	DDA for preferred ion	4.29637e+06
Erucamide	C22 H43 N O	Full match	Full match	Full match	Full match	0.71	337.335	13.639	8.96943e+06	16	2	95.3	83.7	No matches found	No matches found	No matches found	Single match found	No matches found	DDA for preferred ion	8.96943e+06
Merocyclophane C	C36 H56 O5	No match	No results	Not the top hit	Full match	-4.31	568.41	13.736	1.69422e+06	17	0			No matches found	No matches found	No matches found	No matches found	Multiple matches found	DDA for preferred ion	1.69422e+06
	C42 H31 Cl F3 N3 O2	Full match	No results	Unused	No results	0.5	701.206	13.76	8.24368e+06	5	0			No matches found	No matches found	No matches found	No matches found	No matches found	DDA for preferred ion	8.24368e+06

## Sheet: MeOH extract
Table S18: Raw spectral data of E. foeminea methanol crude extract analyzed using ESI+ LC–MS
Name	Formula	Annot. Source: Predicted Compositions	Annot. Source: mzCloud Search	Annot. Source: ChemSpider Search	Annot. Source: MassList Search	Annot. DeltaMass [ppm]	Calc. MW	RT [min]	Area (Max.)	# ChemSpider Results	# mzCloud Results	mzCloud Best Match	mzCloud Best Match Confidence	Mass List Match: Arita Lab 6549 Flavonoid Structure Database	Mass List Match: EFS HRAM Compound Database	Mass List Match: Endogenous Metabolites database 4400 compounds	Mass List Match: Extractables and Leachables HRAM Compound Database	Mass List Match: Natural Products Atlas 2020_06	MS2	Area: ID_13_EF_MEOH_LCMS.raw (F14)
5,6-epoxy-24(R)-methylcholesta-7,22-dien-3β-ol	C28 H46 O2	Full match	No results	Partial match	Full match	-0.89	414.349	0.514	603694	41	0			No matches found	No matches found	Multiple matches found	No matches found	Multiple matches found	DDA for preferred ion	603694
4-[(3R,4S)-3-hydroxy-3,7-dimethylocta- 1,6-dienyl(9Z, 12Z)- 9,12-octadecadienoate	C28 H48 O3	Full match	No results	Partial match	Full match	0.05	432.36	0.515	1.44854e+06	26	0			No matches found	No matches found	Multiple matches found	No matches found	Single match found	DDA for preferred ion	1.44854e+06
	C27 H51 N O3	Full match	No results	Invalid mass	No results	0.75	437.387	0.521	641030	1	0			No matches found	No matches found	No matches found	No matches found	No matches found	DDA for preferred ion	641030
2,3,6-Trimethylphenol	C9 H12 O	Full match	No results	Partial match	Full match	-0.61	136.089	0.525	1.08861e+06	80	0			No matches found	No matches found	No matches found	Multiple matches found	Single match found	DDA for preferred ion	1.08861e+06
UV6260496	C6 H9 N3	Full match	No results	Full match	No results	-0.76	123.08	0.525	924939	50	0			No matches found	No matches found	No matches found	No matches found	No matches found	No MS2	924939
Lanosta-8,24-dien-3beta,23-diol	C29 H48 O2	Not the top hit	No results	Partial match	Full match	-0.42	428.365	0.526	2.58103e+06	61	0			No matches found	No matches found	Multiple matches found	No matches found	Single match found	DDA for preferred ion	2.58103e+06
NP-021293	C30 H48 O4	No match	Invalid mass	No match	No results	-38134.5	454.342	0.526	2.10876e+06	2	5	78.3	8.9	No matches found	No matches found	No matches found	No matches found	No matches found	DDA for preferred ion	2.10876e+06
DILAURYLMETHYLAMINE	C25 H53 N	Full match	No results	Full match	No results	-0.82	367.418	0.529	1.21239e+06	2	0			No matches found	No matches found	No matches found	No matches found	No matches found	No MS2	1.21239e+06
Choline	C5 H13 N O	Full match	Full match	Partial match	Full match	-1.74	103.1	0.583	1.02594e+08	20	4	77	8.8	No matches found	No matches found	Single match found	No matches found	No matches found	DDA for preferred ion	1.02594e+08
		No results	No results	No results	No results		103.098	0.585	3.8208e+06	0	0			No matches found	No matches found	No matches found	No matches found	No matches found	DDA for preferred ion	3.8208e+06
Choline	C5 H13 N O	No results	Invalid mass	No results	No results	17.8	103.102	0.591	4.88106e+06	0	4	77	8.8	No matches found	No matches found	No matches found	No matches found	No matches found	DDA for preferred ion	4.88106e+06
	C4 H10 F2 N2 O5	Full match	No results	No match	No results	1.25	204.056	0.594	1.0474e+06	10	0			No matches found	No matches found	No matches found	No matches found	No matches found	DDA for preferred ion	1.0474e+06
1,6-Dimethyl-1,6-Dinitroso-Biurea	C4 H8 N6 O4	Full match	No results	Full match	No results	1.26	204.061	0.596	1.19902e+07	2	0			No matches found	No matches found	No matches found	No matches found	No matches found	DDA for preferred ion	1.19902e+07
Trigonelline	C7 H7 N O2	Full match	Full match	Partial match	Partial match	-0.62	137.048	0.607	7.12094e+06	87	18	86.2	53.7	No matches found	No matches found	Multiple matches found	No matches found	Multiple matches found	DDA for preferred ion	7.12094e+06
Trigonelline	C7 H7 N O2	No match	Invalid mass	No match	No results	19.87	137.05	0.607	532762	1	18	86.2	53.7	No matches found	No matches found	No matches found	No matches found	No matches found	DDA for preferred ion	532762
DL-Stachydrine	C7 H13 N O2	Full match	Full match	Partial match	Partial match	-0.9	143.095	0.623	2.11404e+06	83	3	73.5	8.7	No matches found	Single match found	Single match found	Multiple matches found	Multiple matches found	DDA for preferred ion	2.11404e+06
		No results	No results	No results	No results		85.0513	0.625	2.0504e+06	0	0			No matches found	No matches found	No matches found	No matches found	No matches found	DDA for preferred ion	2.0504e+06
Kynurenic acid	C10 H7 N O3	Full match	Full match	Partial match	Partial match	-1.55	189.042	0.626	6.94243e+06	90	1	95	73.8	No matches found	No matches found	Multiple matches found	No matches found	Multiple matches found	DDA for preferred ion	6.94243e+06
Prolylleucine	C11 H20 N2 O3	Full match	Full match	Not the top hit	Partial match	-1.63	228.147	0.626	1.82298e+06	37	3	80.1	9	No matches found	No matches found	Multiple matches found	No matches found	Multiple matches found	DDA for preferred ion	1.82298e+06
Ethyltrimethylpyrazine	C9 H14 N2	Full match	No results	Partial match	Full match	-1.35	150.115	0.626	1.46048e+06	50	0			No matches found	No matches found	No matches found	No matches found	Single match found	DDA for preferred ion	1.46048e+06
3-(1-hydroxyethyl)-2,3,6,7,8,8a-hexahydropyrrolo[1,2-a]pyrazine-1,4-dione	C9 H14 N2 O3	Full match	Full match	Partial match	Partial match	-1.11	198.1	0.626	1.34161e+06	34	1	30.1	40.8	No matches found	No matches found	No matches found	No matches found	Multiple matches found	DDA for preferred ion	1.34161e+06
Acetonecyanohydrin	C4 H7 N O	Full match	No results	Partial match	Full match	-2.12	85.0526	0.627	2.19408e+07	47	0			No matches found	No matches found	Single match found	No matches found	No matches found	DDA for preferred ion	2.19408e+07
1422990	C9 H19 N O2	Full match	No results	Full match	No results	-1.71	173.141	0.627	4.35382e+06	45	0			No matches found	No matches found	No matches found	No matches found	No matches found	DDA for preferred ion	4.35382e+06
Buphedrone	C11 H15 N O	Full match	No results	Partial match	Full match	-0.72	177.115	0.627	4.0846e+06	135	0			No matches found	Multiple matches found	No matches found	No matches found	Multiple matches found	No MS2	4.0846e+06
1-Methylamino-1-(3,4-Methylenedioxyphenyl)Propane	C11 H15 N O2	No results	No results	Partial match	Full match	-1.75	193.11	0.627	2.6032e+06	218	0			No matches found	Multiple matches found	Single match found	Multiple matches found	Multiple matches found	No MS2	2.6032e+06
N-(tert-Butyl)-N'-(2-hydroxyethyl)urea	C7 H16 N2 O2	No match	Invalid mass	No match	No match	137296	182.105	0.627	1.20451e+06	118	1	57.5	7.9	No matches found	No matches found	No matches found	No matches found	Multiple matches found	DDA for preferred ion	1.20451e+06
2-Ethyl-2-oxazoline	C5 H9 N O	Full match	No results	Not the top hit	Full match	-1.38	99.0683	0.627	922362	63	0			No matches found	No matches found	No matches found	Multiple matches found	No matches found	No MS2	922362
Adenine	C5 H5 N5	Full match	Full match	Partial match	Full match	-1.61	135.054	0.628	2.8248e+06	32	1	88.3	55	No matches found	No matches found	Single match found	No matches found	No matches found	DDA for preferred ion	2.8248e+06
NP-101A	C9 H10 N2 O2	Full match	No results	Partial match	Full match	-1.67	178.074	0.63	2.0229e+07	97	0			No matches found	No matches found	No matches found	No matches found	Single match found	DDA for preferred ion	2.0229e+07
Aflatoxin G2	C17 H14 O7	No match	Invalid mass	No match	No results	-6.91	330.072	0.63	3.28264e+06	1	6	86.7	9.3	No matches found	No matches found	No matches found	No matches found	No matches found	DDA for preferred ion	3.28264e+06
2-Amino-6-({[(2-chlorobenzyl)oxy]carbonyl}amino)hexanoic acid	C14 H19 Cl N2 O4	No match	Invalid mass	No match	No match	-18.8	314.097	0.633	2.17497e+06	37	3	65.4	8.3	No matches found	Single match found	No matches found	No matches found	No matches found	DDA for preferred ion	2.17497e+06
Acetonecyanohydrin	C4 H7 N O	Full match	No results	Partial match	Full match	-2.12	85.0526	0.895	1.11768e+07	47	0			No matches found	No matches found	Single match found	No matches found	No matches found	DDA for preferred ion	1.11768e+07
NP-101A	C9 H10 N2 O2	Full match	No results	Partial match	Full match	-1.67	178.074	2.958	2.78421e+07	97	0			No matches found	No matches found	No matches found	No matches found	Single match found	DDA for preferred ion	2.78421e+07
(2S,3S)-2,3-Dihydroxysuccinohydrazide	C4 H10 N4 O4	Full match	No results	Full match	No results	-1.61	178.07	2.958	2.57208e+06	6	0			No matches found	No matches found	No matches found	No matches found	No matches found	DDA for preferred ion	2.57208e+06
Kynurenic acid	C10 H7 N O3	Full match	Full match	Partial match	Partial match	-2.2	189.042	3.216	1.59694e+07	90	5	95	73.8	No matches found	No matches found	Multiple matches found	No matches found	Multiple matches found	DDA for preferred ion	1.59694e+07
MM3670000	C12 H26 O7	Full match	No results	Full match	No results	-0.72	282.168	3.608	2.10505e+06	1	0			No matches found	No matches found	No matches found	No matches found	No matches found	No MS2	2.10505e+06
Salinaphthoquinone A	C11 H9 N O4	Full match	No results	Partial match	Full match	-0.04	219.053	3.838	2.1794e+06	80	0			No matches found	No matches found	No matches found	No matches found	Multiple matches found	DDA for preferred ion	2.1794e+06
3,6,9,12,15,18-Hexaoxaicosane-1,20-diol	C14 H30 O8	Full match	No results	Full match	Full match	-0.44	326.194	3.847	1.64005e+06	14	0			No matches found	No matches found	No matches found	Single match found	No matches found	No MS2	1.64005e+06
	C20 H39 N O2 P2	Full match	No results	No match	No results	1.47	387.246	4.057	2.06617e+06	4	0			No matches found	No matches found	No matches found	No matches found	No matches found	No MS2	2.06617e+06
Istamycin C1	C19 H37 N5 O6	Full match	No results	Full match	No results	-3.29	431.273	4.24	2.30834e+06	2	0			No matches found	No matches found	No matches found	No matches found	No matches found	No MS2	2.30834e+06
Z-4-2	C11 H9 N O3	Full match	No results	Partial match	Full match	-0.44	203.058	4.29	2.89847e+06	140	0			No matches found	No matches found	Single match found	No matches found	Single match found	DDA for preferred ion	2.89847e+06
Netilmicin	C21 H41 N5 O7	Full match	No results	Full match	Full match	-3.75	475.299	4.4	2.33426e+06	4	0			No matches found	Single match found	No matches found	No matches found	No matches found	No MS2	2.33426e+06
Skeletocutin P	C29 H44 O9	Not the top hit	No results	No match	Full match	2.12	536.3	4.52	1.59782e+07	25	0			No matches found	No matches found	No matches found	No matches found	Single match found	DDA for preferred ion	1.59782e+07
	C23 H45 N5 O8	Full match	No results	No match	No results	-2.2	519.326	4.542	2.0113e+06	1	0			No matches found	No matches found	No matches found	No matches found	No matches found	No MS2	2.0113e+06
Gageomacrolactin 3	C30 H46 O10	No match	No results	No match	Full match	0.92	566.31	4.544	7.03092e+06	49	0			No matches found	No matches found	No matches found	No matches found	Single match found	DDA for preferred ion	7.03092e+06
	C25 H49 N5 O9	Full match	No results	No match	No results	-2.3	563.352	4.671	1.63875e+06	3	0			No matches found	No matches found	No matches found	No matches found	No matches found	No MS2	1.63875e+06
NP-000919	C11 H18 O4	No match	Invalid mass	No match	No match	-84115.2	196.11	4.75	1.29729e+07	66	2	31.6	6.6	No matches found	No matches found	No matches found	No matches found	Multiple matches found	DDA for preferred ion	1.29729e+07
(2R,3S,4S,5S,6R)-2-({7-hydroxy-4-[(3Z)-5-hydroxy-3-methylpent-3-en-1-yl]-4a,8,8-trimethyl-3-methylidene-decahydronaphthalen-2-yl}oxy)-6-(hydroxymethyl)oxane-3,4,5-triol	C26 H44 O8	No match	Invalid mass	No match	No match	45395	506.289	4.801	4.28586e+06	39	5	76.9	8.8	No matches found	No matches found	No matches found	No matches found	Multiple matches found	DDA for preferred ion	4.28586e+06
(2R,3S,4S,5S,6R)-2-({7-hydroxy-4-[(3Z)-5-hydroxy-3-methylpent-3-en-1-yl]-4a,8,8-trimethyl-3-methylidene-decahydronaphthalen-2-yl}oxy)-6-(hydroxymethyl)oxane-3,4,5-triol	C26 H44 O8	No match	Invalid mass	No match	No match	45395	506.289	4.895	3.78017e+07	39	5	74.8	8.7	No matches found	No matches found	No matches found	No matches found	Multiple matches found	DDA for preferred ion	3.78017e+07
Amoritin	C31 H38 O6	No match	No results	Partial match	Full match	4.63	506.269	4.896	3.07885e+06	69	0			Multiple matches found	No matches found	No matches found	No matches found	No matches found	DDA for preferred ion	3.07885e+06
(2S,3R)-2-Amino-1,3-dodecanediol	C12 H27 N O2	Full match	No results	Full match	No results	-0.28	217.204	5.667	2.61404e+06	5	0			No matches found	No matches found	No matches found	No matches found	No matches found	No MS2	2.61404e+06
10-Nitrolinoleate	C18 H31 N O4	No match	Invalid mass	No match	No match	-55380.1	307.214	6.279	2.98954e+06	93	2	74.1	53.7	No matches found	Multiple matches found	Multiple matches found	No matches found	Multiple matches found	DDA for preferred ion	2.98954e+06
NP-018660	C13 H22 O3	No match	Invalid mass	No match	No match	-79637.9	208.146	6.408	3.66641e+06	86	2	38.5	42.3	No matches found	No matches found	No matches found	Single match found	Multiple matches found	DDA for preferred ion	3.66641e+06
N-Dodecyl-3,4,5-trihydroxybenzamide	C19 H31 N O4	Full match	No results	Full match	No results	-0.39	337.225	6.411	2.46631e+06	33	0			No matches found	No matches found	No matches found	No matches found	No matches found	DDA for preferred ion	2.46631e+06
12-Oxo phytodienoic acid	C18 H28 O3	Full match	Full match	Full match	Partial match	-0.42	292.204	6.518	2.61572e+06	58	10	90.8	82.7	No matches found	No matches found	Multiple matches found	Single match found	Multiple matches found	DDA for preferred ion	2.61572e+06
4-hydroxy-6-[2-(2-methyl-1,2,4a,5,6,7,8,8a-octahydronaphthalen-1-yl)ethyl]oxan-2-one	C18 H28 O3	No match	Invalid mass	No match	No match	-61637	274.193	6.519	4.11251e+06	68	4	83.9	52.3	No matches found	No matches found	No matches found	No matches found	Multiple matches found	DDA for preferred ion	4.11251e+06
(11E,15Z)-9,10,13-trihydroxyoctadeca-11,15-dienoic acid	C18 H32 O5	No match	Invalid mass	No match	No results	66972.1	350.207	6.519	3.3927e+06	2	13	99.6	10	No matches found	No matches found	No matches found	No matches found	No matches found	DDA for preferred ion	3.3927e+06
NP-017152	C13 H23 N O2	Full match	Full match	Partial match	Partial match	-1.2	225.173	6.658	4.04935e+06	27	1	38.7	6.9	No matches found	No matches found	No matches found	Single match found	Multiple matches found	DDA for preferred ion	4.04935e+06
3-(1′-Hydroxypentyl)phenol	C11 H16 O2	Full match	No results	Partial match	Full match	-1.14	180.115	6.771	3.65743e+06	103	0			No matches found	No matches found	No matches found	Single match found	Multiple matches found	DDA for preferred ion	3.65743e+06
5-Hydroxy-7-(hydroxymethyl)-2-methyl-2-(5-oxotetrahydro-2-furanyl)-2,3-dihydro-4H-chromen-4-one	C15 H16 O6	Not the top hit	Full match	Partial match	Full match	0.09	292.095	6.807	3.57892e+06	157	2	37	38.8	No matches found	No matches found	No matches found	No matches found	Multiple matches found	DDA for preferred ion	3.57892e+06
(12Z)-9,10,11-trihydroxyoctadec-12-enoic acid	C18 H34 O5	No match	Invalid mass	No match	No results	66563.5	352.223	6.834	1.32636e+07	4	36	99.8	10	No matches found	No matches found	No matches found	No matches found	No matches found	DDA for preferred ion	1.32636e+07
Sedanolide	C12 H18 O2	Full match	Full match	Full match	Partial match	-0.64	194.131	6.834	4.31778e+06	103	1	65.5	47.2	No matches found	No matches found	No matches found	No matches found	Multiple matches found	DDA for preferred ion	4.31778e+06
	C17 H36 F O P3	Full match	No results	No match	No results	0.17	368.196	6.835	2.97175e+06	1	0			No matches found	No matches found	No matches found	No matches found	No matches found	DDA for preferred ion	2.97175e+06
Palmitoleic Acid	C16 H30 O2	No match	Invalid mass	No match	No match	86475.8	276.209	6.838	4.94113e+06	78	3	81.8	64.2	No matches found	No matches found	Single match found	Single match found	Single match found	DDA for preferred ion	4.94113e+06
(±)13-HpODE	C18 H32 O4	No match	Invalid mass	No match	No match	-57683.4	294.22	6.839	6.42533e+06	74	18	95.3	83.9	No matches found	No matches found	Multiple matches found	No matches found	Multiple matches found	DDA for preferred ion	6.42533e+06
NP-001596	C16 H30 O4	No match	Invalid mass	No match	No results	76803.1	308.197	6.859	1.23173e+07	2	18	99.7	10	No matches found	No matches found	No matches found	No matches found	No matches found	DDA for preferred ion	1.23173e+07
OPEO	C16 H26 O2	Full match	Full match	Partial match	Not the top hit	-0.35	250.193	6.873	1.89275e+07	70	4	67.8	47.7	No matches found	No matches found	Multiple matches found	Multiple matches found	Single match found	DDA for preferred ion	1.89275e+07
NP-001596	C16 H30 O4	No match	Invalid mass	No match	No match	-62927.2	268.204	6.873	4.7802e+06	39	2	79.1	60.5	No matches found	No matches found	No matches found	No matches found	Multiple matches found	DDA for preferred ion	4.7802e+06
Decanophenone	C16 H24 O	Full match	Full match	Partial match	No results	-0.55	232.183	6.873	4.61845e+06	23	1	61.2	42.8	No matches found	No matches found	No matches found	No matches found	No matches found	DDA for preferred ion	4.61845e+06
Escitalopram	C20 H21 F N2 O	No match	Invalid mass	No match	No results	19.72	324.17	6.873	3.34478e+06	1	4	58.2	7.9	No matches found	No matches found	No matches found	No matches found	No matches found	DDA for preferred ion	3.34478e+06
3-Methyl-1-phenyl-1,2-nonadiene	C16 H22	Full match	No results	Full match	No results	-0.57	214.172	6.874	3.34413e+06	5	0			No matches found	No matches found	No matches found	No matches found	No matches found	DDA for preferred ion	3.34413e+06
NP-001596	C16 H30 O4	No match	Invalid mass	No match	No results	76803.1	308.197	6.897	2.40011e+06	21	12	99.7	10	No matches found	No matches found	No matches found	No matches found	No matches found	DDA for preferred ion	2.40011e+06
Wortmannine F	C16 H28 O2	Full match	No results	Partial match	Full match	-1.11	252.209	6.985	2.62794e+06	71	0			No matches found	No matches found	No matches found	No matches found	Multiple matches found	DDA for preferred ion	2.62794e+06
2,6-di-tert-butyl-4-ethylphenol	C16 H26 O	Full match	No results	Partial match	Full match	-1.3	234.198	6.985	1.75391e+06	42	0			No matches found	No matches found	No matches found	Single match found	No matches found	DDA for preferred ion	1.75391e+06
6-cyclohexyl-5-(cyclohexylimino)-4-thia-6-azaspiro[2.4]heptan-7-one	C17 H26 N2 O S	No match	Invalid mass	No match	No results	13.98	306.181	7.001	3.99675e+06	19	2	76.6	8.8	No matches found	No matches found	No matches found	No matches found	No matches found	DDA for preferred ion	3.99675e+06
YM-47515 degradation product	C16 H28 O4	Full match	No results	Partial match	Full match	0.17	284.199	7.015	1.99839e+06	80	0			No matches found	No matches found	No matches found	Single match found	Multiple matches found	DDA for preferred ion	1.99839e+06
NP-008563	C16 H28 O4	No match	Invalid mass	No match	No match	-63373.3	266.188	7.016	6.77722e+06	69	4	66.3	47.4	No matches found	No matches found	Multiple matches found	No matches found	Multiple matches found	DDA for preferred ion	6.77722e+06
Tetranor-12R-HETE	C16 H26 O3	No match	Invalid mass	No match	No match	-67660.8	248.178	7.016	1.65081e+06	76	3	39.8	39.3	No matches found	No matches found	No matches found	Multiple matches found	Multiple matches found	DDA for preferred ion	1.65081e+06
1-[(2-Hydroxyethyl)amino]-2-dodecanol	C14 H31 N O2	Full match	No results	Full match	No results	0.05	245.235	7.022	8.37483e+06	3	0			No matches found	No matches found	No matches found	No matches found	No matches found	DDA for preferred ion	8.37483e+06
N,N-Dimethyldecylamine N-oxide	C12 H27 N O	Full match	Full match	Full match	No results	-0.02	201.209	7.054	3.32064e+06	5	1	81.2	50.8	No matches found	No matches found	No matches found	No matches found	No matches found	DDA for preferred ion	3.32064e+06
2,2,6,6-Tetramethyl-4-piperidinol	C9 H19 N O	Full match	No results	Full match	Full match	-1.23	157.146	7.067	1.88282e+06	48	0			No matches found	No matches found	No matches found	Multiple matches found	No matches found	No MS2	1.88282e+06
tetradecaphytosphingosine	C14 H31 N O3	Full match	No results	Full match	No results	-0.82	261.23	7.161	3.62008e+06	3	0			No matches found	No matches found	No matches found	No matches found	No matches found	DDA for preferred ion	3.62008e+06
NP-001596	C16 H30 O4	No match	Invalid mass	No match	No match	-62927.2	268.204	7.189	6.19615e+06	39	3	86.4	70.6	No matches found	No matches found	No matches found	No matches found	Multiple matches found	DDA for preferred ion	6.19615e+06
OPEO	C16 H26 O2	Full match	Full match	Partial match	Not the top hit	-0.35	250.193	7.189	2.97707e+06	70	2	66.1	8.3	No matches found	No matches found	Multiple matches found	Multiple matches found	Single match found	DDA for preferred ion	2.97707e+06
NP-001596	C16 H30 O4	No match	Invalid mass	No match	No results	76803.1	308.197	7.189	2.41147e+06	21	13	99.7	10	No matches found	No matches found	No matches found	No matches found	No matches found	DDA for preferred ion	2.41147e+06
Cyprodenate	C13 H25 N O2	Full match	No results	Full match	No results	-0.09	227.189	7.241	7.31619e+06	13	0			No matches found	No matches found	No matches found	No matches found	No matches found	No MS2	7.31619e+06
exo-1,7,7-Trimethylbicyclo(2.2.1)hept-2-yl acrylate	C13 H20 O2	Full match	No results	Partial match	Full match	-0.42	208.146	7.379	1.58932e+06	86	0			No matches found	No matches found	No matches found	Single match found	Multiple matches found	No MS2	1.58932e+06
ML-236C	C18 H26 O3	Full match	No results	Full match	Full match	-0.02	290.188	7.424	8.34396e+06	78	0			No matches found	No matches found	No matches found	Single match found	Multiple matches found	DDA for preferred ion	8.34396e+06
Allahabadolactone B	C18 H26 O3	Full match	No results	Partial match	Full match	-0.02	290.188	7.504	1.8389e+06	78	0			No matches found	No matches found	No matches found	Single match found	Multiple matches found	DDA for preferred ion	1.8389e+06
Phthalic anhydride	C8 H4 O3	Full match	No results	Full match	Full match	-1.89	148.016	7.517	1.61114e+06	3	0			No matches found	No matches found	No matches found	Single match found	No matches found	No MS2	1.61114e+06
Allahabadolactone B	C18 H26 O3	Full match	No results	Partial match	Full match	-0.02	290.188	7.546	1.89803e+06	78	0			No matches found	No matches found	No matches found	Single match found	Multiple matches found	DDA for preferred ion	1.89803e+06
5-(6-hydroxy-6-methyloctyl)-2,5-dihydrofuran-2-one	C13 H22 O3	No match	Invalid mass	No match	No match	-79637.9	208.146	7.69	2.37767e+07	86	6	50.1	62.1	No matches found	No matches found	No matches found	Single match found	Multiple matches found	DDA for preferred ion	2.37767e+07
Bis(methylbenzylidene)sorbitol	C22 H26 O6	Full match	Full match	Partial match	Partial match	-1.29	386.172	7.808	1.71475e+06	334	4	99.2	10	Multiple matches found	No matches found	No matches found	Single match found	Multiple matches found	DDA for preferred ion	1.71475e+06
Tetranor-12(S)-HETE	C16 H26 O3	No match	Invalid mass	No match	No match	82588.6	288.172	7.816	3.99939e+06	80	12	88.9	9.4	No matches found	No matches found	Multiple matches found	No matches found	Multiple matches found	DDA for preferred ion	3.99939e+06
6-O-[(2E)-3-(4-Hydroxyphenyl)-2-propenoyl]-1-O-[(2E)-3-phenyl-2-propenoyl]-β-D-glucopyranose	C24 H24 O9	No match	Invalid mass	No match	No match	-39483.8	438.132	7.966	8.75243e+06	25	2	72.9	8.6	Single match found	No matches found	No matches found	No matches found	Multiple matches found	DDA for preferred ion	8.75243e+06
Coumarin	C9 H6 O2	Full match	Full match	Not the top hit	Partial match	-0.65	146.037	7.966	3.71704e+06	19	6	68.8	47.8	No matches found	No matches found	Multiple matches found	Single match found	Multiple matches found	DDA for preferred ion	3.71704e+06
Coumarin	C9 H6 O2	Full match	Full match	Not the top hit	Partial match	-0.65	146.037	8.015	1.23436e+06	19	4	65.1	47.2	No matches found	No matches found	Multiple matches found	Single match found	Multiple matches found	DDA for preferred ion	1.23436e+06
6-O-[(2E)-3-(4-Hydroxyphenyl)-2-propenoyl]-1-O-[(2E)-3-phenyl-2-propenoyl]-β-D-glucopyranose	C24 H24 O9	No match	Invalid mass	No match	No match	-39483.8	438.132	8.131	3.56158e+06	31	3	73.3	8.7	Single match found	No matches found	No matches found	No matches found	Multiple matches found	DDA for preferred ion	3.56158e+06
Coumarin	C9 H6 O2	Full match	Full match	Not the top hit	Partial match	-0.65	146.037	8.131	1.17302e+06	19	2	63.1	46.8	No matches found	No matches found	Multiple matches found	Single match found	Multiple matches found	DDA for preferred ion	1.17302e+06
Palmitic Acid	C16 H32 O2	No match	Invalid mass	No match	No match	66446.6	273.267	8.206	5.35783e+07	7	3	82.8	51.7	No matches found	No matches found	No matches found	Single match found	No matches found	DDA for preferred ion	5.35783e+07
		No results	No results	No results	No results		273.258	8.206	2.22818e+06	0	0			No matches found	No matches found	No matches found	No matches found	No matches found	DDA for preferred ion	2.22818e+06
		No results	No results	No results	No results		273.275	8.207	3.2352e+06	0	0			No matches found	No matches found	No matches found	No matches found	No matches found	DDA for preferred ion	3.2352e+06
5-(6-hydroxy-6-methyloctyl)-2,5-dihydrofuran-2-one	C13 H22 O3	No match	Invalid mass	No match	No match	-79637.9	208.146	8.216	3.32289e+06	86	2	45.6	60.8	No matches found	No matches found	No matches found	Single match found	Multiple matches found	DDA for preferred ion	3.32289e+06
Lauryldimethylamine oxide	C14 H31 N O	Full match	No results	Full match	No results	-1.83	229.24	8.252	1.78847e+07	7	0			No matches found	No matches found	No matches found	No matches found	No matches found	DDA for preferred ion	1.78847e+07
Phytosphingosine;D-Ribo-2-amino-1_3_4-Octadecanetriol	C18 H39 N O3	Full match	No results	Partial match	Full match	-0.41	317.293	8.273	1.71917e+06	5	0			No matches found	No matches found	Single match found	No matches found	Single match found	No MS2	1.71917e+06
DIHYDROXYETHYL LAURAMINE OXIDE	C16 H35 N O3	Full match	No results	Full match	No results	-1.33	289.261	8.315	1.45072e+07	5	0			No matches found	No matches found	No matches found	No matches found	No matches found	DDA for preferred ion	1.45072e+07
1785113	C16 H33 N O2	Full match	No results	Full match	No results	-1.29	271.251	8.437	1.96511e+06	19	0			No matches found	No matches found	No matches found	No matches found	No matches found	No MS2	1.96511e+06
Eplerenone	C24 H30 O6	Full match	No results	Partial match	Full match	-0.73	414.204	8.512	3.63245e+06	280	0			No matches found	Single match found	No matches found	Single match found	Multiple matches found	No MS2	3.63245e+06
Hexadecanamide;Palmiticamide	C16 H33 N O	Full match	No results	Partial match	Full match	-0.01	255.256	8.582	2.81177e+06	15	0			No matches found	No matches found	Single match found	Single match found	No matches found	No MS2	2.81177e+06
Lauryldimethylamine oxide	C14 H31 N O	Full match	No results	Full match	No results	-1.83	229.24	8.77	2.54818e+06	7	0			No matches found	No matches found	No matches found	No matches found	No matches found	No MS2	2.54818e+06
Palmitoleic Acid	C16 H30 O2	No match	Invalid mass	No match	No match	86475.8	276.209	9.142	3.81663e+06	78	3	73.9	53.4	No matches found	No matches found	Single match found	Single match found	Single match found	DDA for preferred ion	3.81663e+06
Palmitoleic Acid	C16 H30 O2	No match	Invalid mass	No match	No match	86475.8	276.209	9.213	3.85136e+06	78	3	75.1	55	No matches found	No matches found	Single match found	Single match found	Single match found	DDA for preferred ion	3.85136e+06
Sphinganine;2-Amion-1_3-octadecanediol	C18 H39 N O2	Full match	No results	Partial match	Full match	0.11	301.298	9.358	4.98499e+06	13	0			No matches found	No matches found	Single match found	No matches found	No matches found	DDA for preferred ion	4.98499e+06
NP-004713	C15 H24 O2	No match	Invalid mass	No match	No match	-76259.5	218.167	9.368	2.42316e+06	111	10	67.1	43.7	No matches found	No matches found	Multiple matches found	No matches found	Multiple matches found	DDA for preferred ion	2.42316e+06
4-hydroxy-6-[2-(2-methyl-1,2,4a,5,6,7,8,8a-octahydronaphthalen-1-yl)ethyl]oxan-2-one	C18 H28 O3	No match	Invalid mass	No match	No results	75227.7	314.186	9.369	1.88162e+06	14	16	93	9.7	No matches found	No matches found	No matches found	No matches found	No matches found	DDA for preferred ion	1.88162e+06
4-hydroxy-6-[2-(2-methyl-1,2,4a,5,6,7,8,8a-octahydronaphthalen-1-yl)ethyl]oxan-2-one	C18 H28 O3	No match	Invalid mass	No match	No match	-61637	274.193	9.37	1.44035e+06	68	8	81.8	51.2	No matches found	No matches found	No matches found	No matches found	Multiple matches found	DDA for preferred ion	1.44035e+06
4-hydroxy-6-[2-(2-methyl-1,2,4a,5,6,7,8,8a-octahydronaphthalen-1-yl)ethyl]oxan-2-one	C18 H28 O3	No match	Invalid mass	No match	No match	-61637	274.193	9.49	2.49095e+06	68	7	81.5	63.9	No matches found	No matches found	No matches found	No matches found	Multiple matches found	DDA for preferred ion	2.49095e+06
	C31 H53 F3 N4 O	Full match	No results	No match	No results	0.03	554.417	9.625	1.67879e+06	2	0			No matches found	No matches found	No matches found	No matches found	No matches found	DDA for preferred ion	1.67879e+06
α-Eleostearic acid	C18 H30 O2	Full match	Full match	Not the top hit	Partial match	-0.6	278.224	9.659	6.38786e+06	111	20	98.2	83	No matches found	No matches found	Multiple matches found	Multiple matches found	Multiple matches found	DDA for preferred ion	6.38786e+06
	C33 H56 F2 O4	Full match	No results	No match	No results	4.78	554.417	9.697	9.29215e+06	1	0			No matches found	No matches found	No matches found	No matches found	No matches found	DDA for preferred ion	9.29215e+06
α-Linolenic acid	C18 H30 O2	Full match	Full match	Full match	Full match	-0.6	278.224	9.714	4.13931e+06	111	15	97.9	9.9	No matches found	No matches found	Multiple matches found	Multiple matches found	Multiple matches found	DDA for preferred ion	4.13931e+06
N-{[(2R,4S,5R)-5-Vinyl-1-azabicyclo[2.2.2]oct-2-yl]methyl}cyclohexanecarboxamide	C17 H28 N2 O	No results	Invalid mass	No results	No results	-12.46	276.217	9.877	1.24614e+06	0	3	52.1	44.8	No matches found	No matches found	No matches found	No matches found	No matches found	DDA for preferred ion	1.24614e+06
Palmitoleic Acid	C16 H30 O2	No match	Invalid mass	No match	No match	86475.8	276.209	9.878	1.36463e+07	78	4	80.7	75.7	No matches found	No matches found	Single match found	Single match found	Single match found	DDA for preferred ion	1.36463e+07
Bicyclohexyliden-2-one	C12 H18 O	Full match	No results	Partial match	Full match	-1.15	178.136	9.878	4.82161e+06	70	0			No matches found	No matches found	No matches found	Multiple matches found	Multiple matches found	DDA for preferred ion	4.82161e+06
Cafestol	C20 H28 O3	No match	Invalid mass	No match	No match	-69526.5	294.219	9.879	1.51049e+07	74	88	93	9.6	No matches found	No matches found	Multiple matches found	No matches found	Multiple matches found	DDA for preferred ion	1.51049e+07
Palmitoleic Acid	C16 H30 O2	No match	Invalid mass	No match	No match	86475.8	276.209	9.949	4.17222e+06	78	3	78.7	60	No matches found	No matches found	Single match found	Single match found	Single match found	DDA for preferred ion	4.17222e+06
(±)13-HpODE	C18 H32 O4	No match	Invalid mass	No match	No match	-57683.7	294.219	9.95	5.11516e+06	74	12	93.4	83.6	No matches found	No matches found	Multiple matches found	No matches found	Multiple matches found	DDA for preferred ion	5.11516e+06
Palmitoleic Acid	C16 H30 O2	No match	Invalid mass	No match	No match	86475.8	276.209	10.037	2.30699e+07	78	3	79.4	74.8	No matches found	No matches found	Single match found	Single match found	Single match found	DDA for preferred ion	2.30699e+07
Cafestol	C20 H28 O3	No match	Invalid mass	No match	No match	-69526.2	294.219	10.037	1.51405e+07	74	88	93	9.6	No matches found	No matches found	Multiple matches found	No matches found	Multiple matches found	DDA for preferred ion	1.51405e+07
N-{[(2R,4S,5R)-5-Vinyl-1-azabicyclo[2.2.2]oct-2-yl]methyl}cyclohexanecarboxamide	C17 H28 N2 O	No results	Invalid mass	No results	No results	-12.46	276.217	10.037	2.13416e+06	0	3	44.7	43.5	No matches found	No matches found	No matches found	No matches found	No matches found	DDA for preferred ion	2.13416e+06
Phthalic anhydride	C8 H4 O3	Full match	No results	Partial match	Full match	-1.89	148.016	10.067	2.31365e+06	3	0			No matches found	No matches found	No matches found	Single match found	No matches found	DDA for preferred ion	2.31365e+06
Phthalic anhydride	C8 H4 O3	Full match	No results	Partial match	Full match	-1.89	148.016	10.14	5.30856e+06	3	0			No matches found	No matches found	No matches found	Single match found	No matches found	DDA for preferred ion	5.30856e+06
Palmitoleic Acid	C16 H30 O2	No match	Invalid mass	No match	No match	86475.8	276.209	10.178	2.13748e+07	78	5	82.8	77.2	No matches found	No matches found	Single match found	Single match found	Single match found	DDA for preferred ion	2.13748e+07
N-{[(2R,4S,5R)-5-Vinyl-1-azabicyclo[2.2.2]oct-2-yl]methyl}cyclohexanecarboxamide	C17 H28 N2 O	No results	Invalid mass	No results	No results	-12.46	276.217	10.178	1.8878e+06	0	5	51.8	44.8	No matches found	No matches found	No matches found	No matches found	No matches found	DDA for preferred ion	1.8878e+06
9-Oxo-10(E),12(E)-octadecadienoic acid	C18 H30 O3	Full match	Full match	Full match	Partial match	-0.27	294.219	10.179	1.64434e+07	74	24	98	91.4	No matches found	No matches found	Multiple matches found	No matches found	Multiple matches found	DDA for preferred ion	1.64434e+07
Linoleoyl ethanolamide	C20 H37 N O2	Full match	Full match	Full match	No results	-1.52	323.282	10.761	3.88763e+06	8	13	98	9.9	No matches found	No matches found	No matches found	No matches found	No matches found	DDA for preferred ion	3.88763e+06
	C20 H31 F3 O6	Full match	No results	No match	No results	0.48	424.207	10.875	1.96115e+06	1	0			No matches found	No matches found	No matches found	No matches found	No matches found	No MS2	1.96115e+06
pheophorbide b	C35 H34 N4 O6	Full match	No results	Full match	No results	-0.68	606.247	11.167	2.44687e+06	15	0			No matches found	No matches found	No matches found	No matches found	No matches found	DDA for preferred ion	2.44687e+06
3,5-dichloro-2'-O-methylnorstenosporic acid	C23 H26 Cl2 O7	No match	No results	No match	Full match	-0.53	484.105	11.293	3.16676e+06	44	0			No matches found	No matches found	No matches found	No matches found	Multiple matches found	No MS2	3.16676e+06
(4R,4'S)-2'-(3-Chlorophenyl)-5'-phenyl-4'-(2-thienyl)-2,2',3,4'-tetrahydro-5H-spiro[1-benzothiepine-4,3'-pyrazol]-5-one	C28 H21 Cl N2 O S2	Full match	No results	Full match	No results	0.62	500.079	11.293	2.40934e+06	1	0			No matches found	No matches found	No matches found	No matches found	No matches found	No MS2	2.40934e+06
Dodecamethylcyclohexasiloxane	C12 H36 O6 Si6	No match	Full match	No match	Full match	-1.03	444.112	11.293	1.88577e+06	2	4	94.8	84.1	No matches found	No matches found	No matches found	Single match found	No matches found	DDA for preferred ion	1.88577e+06
Decamethylcyclopentasiloxane	C10 H30 O5 Si5	Unused	No results	No match	Full match	-0.68	370.094	11.294	1.77442e+06	1	0			No matches found	No matches found	No matches found	Single match found	Single match found	DDA for preferred ion	1.77442e+06
8-Bromo-2-(3-pyridinylcarbonyl)-1,3,4,12a-tetrahydropyrazino[2,1-c][1,4]benzodiazepine-6,12(2H,11H)-dione	C18 H15 Br N4 O3	No match	Invalid mass	No match	No results	5.92	414.035	11.398	8.04225e+06	31	1	33.3	41.4	No matches found	No matches found	No matches found	No matches found	No matches found	DDA for preferred ion	8.04225e+06
	C21 H42 F N O	Full match	No results	No match	No results	-4.13	343.324	11.42	1.97624e+06	6	0			No matches found	No matches found	No matches found	No matches found	No matches found	DDA for preferred ion	1.97624e+06
Oleoyl ethanolamide	C20 H39 N O2	Full match	Full match	Full match	Full match	-1.12	325.298	11.521	2.02832e+06	17	2	95.2	74.3	No matches found	No matches found	No matches found	Single match found	Single match found	DDA for preferred ion	2.02832e+06
	C21 H42 F N O	Full match	No results	No match	No results	-4.13	343.324	11.623	2.2267e+06	6	0			No matches found	No matches found	No matches found	No matches found	No matches found	DDA for preferred ion	2.2267e+06
NP-010770	C33 H40 N2 O9	No match	Invalid mass	No match	No results	-18.09	608.262	11.859	8.52295e+06	9	4	69.7	67.8	No matches found	No matches found	No matches found	No matches found	No matches found	DDA for preferred ion	8.52295e+06
	C33 H53 N O8 P2	Full match	No results	No match	No results	-0.76	653.324	11.908	1.66692e+06	23	0			No matches found	No matches found	No matches found	No matches found	No matches found	No MS2	1.66692e+06
Cryptophycin-19	C34 H41 Cl N2 O7	No match	No results	No match	Full match	-2.82	624.258	12.007	4.8608e+06	4	0			No matches found	No matches found	No matches found	No matches found	Multiple matches found	DDA for preferred ion	4.8608e+06
NP-010770	C33 H40 N2 O9	No match	Invalid mass	No match	No results	-18.09	608.262	12.151	1.90706e+07	12	8	63.7	43.2	No matches found	No matches found	No matches found	No matches found	No matches found	DDA for preferred ion	1.90706e+07
5'-O-({1-[(2e)-4-(4-Hydroxy-6-Methoxy-7-Methyl-3-Oxo-1,3-Dihydro-2-Benzofuran-5-Yl)-2-Methylbut-2-En-1-Yl]-1h-1,2,3-Triazol-4-Yl}methyl)adenosine	C28 H32 N8 O8	No results	No results	Full match	No results	3.4	608.236	12.154	654693	31	0			No matches found	No matches found	No matches found	No matches found	No matches found	DDA for preferred ion	654693
Didemethylasterriquinone D	C22 H14 N2 O4	Invalid mass	No results	Partial match	Full match	-4.63	370.094	12.273	8.95868e+06	112	0			No matches found	No matches found	No matches found	Single match found	Single match found	DDA for preferred ion	8.95868e+06
	C31 H33 Cl F N O S2	Full match	No results	No match	No results	0.84	553.168	12.273	2.7063e+06	35	0			No matches found	No matches found	No matches found	No matches found	No matches found	No MS2	2.7063e+06
3-[(3S,4S,21R)-14-Ethyl-21-(methoxycarbonyl)-4,8,13,18-tetramethyl-20-oxo-9-vinyl-3-phorbinyl]propanoic acid (Pheophorbide A)	C35 H36 N4 O5	Full match	No results	Full match	No results	-0.44	592.268	12.36	8.07526e+07	27	0			No matches found	No matches found	No matches found	No matches found	No matches found	DDA for preferred ion	8.07526e+07
	C20 H42 F4 N10 O2 P2	Full match	No results	No match	No results	4.18	592.293	12.36	7.16083e+06	18	0			No matches found	No matches found	No matches found	No matches found	No matches found	DDA for preferred ion	7.16083e+06
2-(Allyl{4-[(2-ethyl-5,7-dimethyl-3H-imidazo[4,5-b]pyridin-3-yl)methyl]phenyl}amino)-2-phenyl-N-(phenylsulfonyl)acetamide	C34 H35 N5 O3 S	No results	No results	Full match	No results	3.94	593.248	12.36	1.48824e+06	13	0			No matches found	No matches found	No matches found	No matches found	No matches found	DDA for preferred ion	1.48824e+06
3-[(3S,4S,21R)-14-Ethyl-21-(methoxycarbonyl)-4,8,13,18-tetramethyl-20-oxo-9-vinyl-3-phorbinyl]propanoic acid	C35 H36 N4 O5	Full match	No results	Full match	No results	-0.46	592.268	12.548	2.07208e+07	27	0			No matches found	No matches found	No matches found	No matches found	No matches found	DDA for preferred ion	2.07208e+07
	C20 H44 N6 O14	Full match	No results	No match	No results	1.65	592.293	12.549	1.66752e+06	26	0			No matches found	No matches found	No matches found	No matches found	No matches found	DDA for preferred ion	1.66752e+06
SB236057A	C33 H34 N4 O3	Full match	Full match	Partial match	No match	-0.88	534.263	12.702	7.62331e+06	58	3	72.1	8.6	No matches found	No matches found	No matches found	No matches found	Multiple matches found	DDA for preferred ion	7.62331e+06
5-Olefin phenylpyropene A	C32 H36 O9	Not the top hit	No results	Not the top hit	Full match	2.3	564.237	12.714	4.71694e+06	19	0			No matches found	No matches found	No matches found	No matches found	Single match found	DDA for preferred ion	4.71694e+06
(1R,9S)-5-[(E)-2-(4-Chlorophenyl)vinyl]-11-(5-pyrimidinylcarbonyl)-7,11-diazatricyclo[7.3.1.02,7]trideca-2,4-dien-6-one	C24 H21 Cl N4 O2	No match	Invalid mass	No match	No results	87847.4	470.097	12.946	8.33419e+06	61	6	56.2	7.8	No matches found	No matches found	No matches found	No matches found	No matches found	DDA for preferred ion	8.33419e+06
Octyl isothiocyanate	C9 H17 N S	Full match	No results	Full match	No results	-1.06	171.108	12.947	2.69778e+06	5	0			No matches found	No matches found	No matches found	No matches found	No matches found	No MS2	2.69778e+06
N-dodecanoylsphinganine	C30 H61 N O3	Full match	No results	Full match	No results	-0.4	483.465	13.034	1.53189e+06	1	0			No matches found	No matches found	No matches found	No matches found	No matches found	DDA for preferred ion	1.53189e+06
N-{4-[4-(4-Chlorophenyl)-1-piperazinyl]benzyl}-2-(dibenzo[b,d]thiophen-2-yl)imidazo[1,2-a]pyridine-3-carboxamide	C37 H30 Cl N5 O S	Full match	No results	Full match	No results	0.68	627.186	13.091	8.19169e+06	1	0			No matches found	No matches found	No matches found	No matches found	No matches found	DDA for preferred ion	8.19169e+06
Decamethylcyclopentasiloxane	C10 H30 O5 Si5	Invalid mass	No results	Full match	Full match	-0.92	370.094	13.091	2.5382e+06	112	0			No matches found	No matches found	No matches found	Single match found	Single match found	No MS2	2.5382e+06
Merocyclophane C	C36 H56 O5	No match	No results	Not the top hit	Full match	-4.95	568.41	13.167	1.01744e+06	17	0			No matches found	No matches found	No matches found	No matches found	Multiple matches found	DDA for preferred ion	1.01744e+06
Pestalpolyol D	C34 H60 O5	Full match	No results	Partial match	Full match	-0.72	548.444	13.631	4.82511e+06	2	0			No matches found	No matches found	No matches found	No matches found	Single match found	DDA for preferred ion	4.82511e+06
Erucamide	C22 H43 N O	Full match	Full match	Full match	Full match	0.62	337.335	13.638	1.25291e+07	16	2	95.3	83.8	No matches found	No matches found	No matches found	Single match found	No matches found	DDA for preferred ion	1.25291e+07
Merocyclophane C	C36 H56 O5	No match	No results	Not the top hit	Full match	-4.31	568.41	13.734	1.56126e+06	17	0			No matches found	No matches found	No matches found	No matches found	Multiple matches found	DDA for preferred ion	1.56126e+06
	C28 H48 Cl N3 O7 S4	Full match	No results	Unused	No results	-0.37	701.206	13.759	1.14159e+07	5	0			No matches found	No matches found	No matches found	No matches found	No matches found	DDA for preferred ion	1.14159e+07
