# Supplementary material for: Untargeted Metabolomic Profiling and Antioxidant Capacities of Different Solvent Crude Extracts of Ephedra foeminea
Source: Metabolites. 2022 May 17;12(5):451. doi: 10.3390/metabo12050451 (PMC9146585; doi:10.3390/metabo12050451)
Supplement: Supplementary file 1 [file metabolites-12-00451-s001.zip › Supplementary Tables.pdf]

**Table S1.** Identified metabolites in *E. foeminea* crude extracts analyzed by positive mode LC–MS.

| <b>(a) acetone extract.</b>                                                                                                                                              |                   |          |
|--------------------------------------------------------------------------------------------------------------------------------------------------------------------------|-------------------|----------|
| Compound Name                                                                                                                                                            | Formula           | RT [min] |
| Unknown                                                                                                                                                                  | C26 H49 F O       | 0.519    |
| 1-Methylpyrrolidin-2-one                                                                                                                                                 | C5 H9 N O         | 0.531    |
| 4,6-dimethylpyrimidin-2-amine                                                                                                                                            | C6 H9 N3          | 0.531    |
| Lanosta-8,24-dien-3 $\beta$ ,23-diol                                                                                                                                     | C29 H48 O2        | 0.536    |
| NP-021293                                                                                                                                                                | C30 H48 O4        | 0.536    |
| 2-Hydroxy-N,N,N-trimethylethan-1-aminium                                                                                                                                 | C5 H13 N O        | 0.578    |
| (3bS,5aS,7R,8R,10aR,10bS)-7-(Hydroxymethyl)-10b-methyl-3b,4,5,6,7,8,9,10,10a,10b,11,12-dodecahydro-5a,8-methanocyclohepta[5,6]naphtho[2,1-b]furan-7-ol                   | C5 H13 N O        | 0.583    |
| Unknown                                                                                                                                                                  | C4 H10 F2 N2 O5   | 0.591    |
| 4-(Hydroxyamino)-1-((1-hydroxy-1-[2-(hydroxymethyl)-1-pyrrolidinyl]-3-methyl-2-butanyl)amino)-2-pentyl-1,4-butanediol                                                    | C9 H8 N4 O2       | 0.595    |
| 2-Hydroxy-2-methylpropanenitrile                                                                                                                                         | C5 H5 N5          | 0.626    |
| cis-N-Butyl-4-(4-octylphenyl)cyclohexanamine                                                                                                                             | C26 H28 O14       | 0.626    |
| 1-Methylamino-1-(3,4-Methylenedioxyphenyl)Propane                                                                                                                        | C11 H15 N O2      | 0.627    |
| 3-(Dimethylamino)propyl acrylate                                                                                                                                         | C8 H15 N O2       | 0.627    |
| (2Z,4S,5S,6S,7R,8Z)-2,9-Diphenyldeca-2,8-diene-3,4,5,6,7,8-hexol                                                                                                         | C11 H15 N O       | 0.627    |
| exo-1,7,7-Trimethylbicyclo(2.2.1)hept-2-yl acrylate                                                                                                                      | C9 H17 N O2       | 0.627    |
| 4-Hydroxyquinoline-2-carboxylic acid                                                                                                                                     | C10 H7 N O3       | 0.627    |
| pyridine-3-carboxamide                                                                                                                                                   | C6 H6 N2 O        | 0.627    |
| (10E,12E)-9-oxooctadeca-10,12-dienoic acid                                                                                                                               | C4 H7 N O         | 0.628    |
| Unknown                                                                                                                                                                  | C9 H17 F3 N4      | 0.629    |
| 2-Ethyl-2-oxazoline                                                                                                                                                      | C5 H9 N O         | 0.63     |
| exo-1,7,7-Trimethylbicyclo(2.2.1)hept-2-yl acrylate                                                                                                                      | C13 H20 O2        | 0.63     |
| 2-Amino-6-(((2-chlorobenzyl)oxy)carbonyl)amino)hexanoic acid                                                                                                             | C14 H19 Cl N2 O4  | 0.631    |
| 2-Hydroxy-2-methylpropanenitrile                                                                                                                                         | C4 H7 N O         | 0.897    |
| 2,3-dihydroxybutanedihydrazide                                                                                                                                           | C4 H10 N4 O4      | 2.995    |
| 4-Hydroxyquinoline-2-carboxylic acid                                                                                                                                     | C10 H7 N O3       | 3.237    |
| Hexadecanamide                                                                                                                                                           | C12 H26 O7        | 3.598    |
| 3,6,9,12,15,18-Hexaoxaicosane-1,20-diol                                                                                                                                  | C14 H30 O8        | 3.819    |
| Unknown                                                                                                                                                                  | C19 H35 F N3 O2 P | 4.027    |
| Unknown                                                                                                                                                                  | C23 H45 N5 O8     | 4.533    |
| Unknown                                                                                                                                                                  | C25 H49 N5 O9     | 4.665    |
| (2R,3S,4S,5S,6R)-2-((7-hydroxy-4-[(3Z)-5-hydroxy-3-methylpent-3-en-1-yl]-4a,8,8-trimethyl-3-methylidene-decahydronaphthalen-2-yl)oxy)-6-(hydroxymethyl)oxane-3,4,5-triol | C26 H44 O8        | 4.724    |
| (2R,3S,4S,5S,6R)-2-((7-hydroxy-4-[(3Z)-5-hydroxy-3-methylpent-3-en-1-yl]-4a,8,8-trimethyl-3-methylidene-decahydronaphthalen-2-yl)oxy)-6-(hydroxymethyl)oxane-3,4,5-triol | C26 H44 O8        | 4.821    |
| (2R,3S,4S,5S,6R)-2-((7-hydroxy-4-[(3Z)-5-hydroxy-3-methylpent-3-en-1-yl]-4a,8,8-trimethyl-3-methylidene-decahydronaphthalen-2-yl)oxy)-6-(hydroxymethyl)oxane-3,4,5-triol | C26 H44 O8        | 4.887    |
| 3-[(3S,4S,21R)-14-Ethyl-21-(methoxycarbonyl)-4,8,13,18-tetramethyl-20-oxo-9-vinyl-3-phorbiny]propanoic acid                                                              | C20 H22 O7        | 6.045    |
| NP-018660                                                                                                                                                                | C13 H22 O3        | 6.406    |
| (11E,15Z)-9,10,13-trihydroxyoctadeca-11,15-dienoic acid                                                                                                                  | C18 H32 O5        | 6.519    |
| NP-017152                                                                                                                                                                | C13 H23 N O2      | 6.658    |
| 3-(1'-Hydroxypentyl)phenol                                                                                                                                               | C11 H16 O2        | 6.769    |
| 3-(4-Hydroxyphenyl)-1-(2,4,6-trihydroxyphenyl)propan-1-one                                                                                                               | C15 H14 O5        | 6.798    |
| chromen-2-one                                                                                                                                                            | C9 H6 O2          | 6.805    |

|                                                                                                                                                                      |                    |       |
|----------------------------------------------------------------------------------------------------------------------------------------------------------------------|--------------------|-------|
| 3,5,7-trihydroxy-2-(4-hydroxyphenyl)-4H-1-benzopyran-4-one                                                                                                           | C15 H10 O6         | 6.805 |
| (9Z)-Hexadec-9-enoic acid                                                                                                                                            | C16 H30 O2         | 6.839 |
| (9Z,11E,13S)-13-hydroperoxyoctadeca-9,11-dienoic acid                                                                                                                | C18 H32 O4         | 6.84  |
| 2-[(3S)-1-(Cyclohexylmethyl)-3-pyrrolidinyl]-1H-benzimidazole-5-carbonitrile                                                                                         | C19 H24 N4         | 6.87  |
| 3-hydroxy-3,4-bis[(4-hydroxy-3-methoxyphenyl)methyl]oxolan-2-one                                                                                                     | C16 H22            | 6.873 |
| Decamethylcyclopentasiloxane                                                                                                                                         | C16 H24 O          | 6.874 |
| OPEO                                                                                                                                                                 | C16 H26 O2         | 6.874 |
| (4Z,6E,8R,10Z)-8-hydroxyhexadeca-4,6,10-trienoic acid                                                                                                                | C16 H26 O3         | 6.884 |
| NP-020214                                                                                                                                                            | C16 H32 O4         | 6.982 |
| 2,6-di-tert-butyl-4-ethylphenol                                                                                                                                      | C16 H26 O          | 6.985 |
| NP-020214                                                                                                                                                            | C16 H32 O4         | 6.985 |
| 5'-O-([1-[(2e)-4-(4-Hydroxy-6-Methoxy-7-Methyl-3-Oxo-1,3-Dihydro-2-Benzofuran-5-Yl)-2-Methylbut-2-En-1-Yl]-1h-1,2,3-Triazol-4-Yl)methyl]adenosine                    | C17 H26 N2 O S     | 7.009 |
| NP-008563                                                                                                                                                            | C16 H28 O4         | 7.014 |
| (4Z,6E,8R,10Z)-8-hydroxyhexadeca-4,6,10-trienoic acid                                                                                                                | C16 H26 O3         | 7.014 |
| 1-[(2-Hydroxyethyl)amino]-2-dodecanol                                                                                                                                | C14 H31 N O2       | 7.022 |
| N,N-Dimethyldodecan-1-amine N-oxide                                                                                                                                  | C12 H27 N O        | 7.054 |
| NP-015468                                                                                                                                                            | C20 H16 O4         | 7.133 |
| (2S,3S,4R)-2-aminotetradecane-1,3,4-triol                                                                                                                            | C14 H31 N O3       | 7.158 |
| OPEO                                                                                                                                                                 | C16 H26 O2         | 7.188 |
| 2-[1-(2H-1,3-benzodioxol-5-yl)propan-2-yl]-6-methoxy-4-(prop-2-en-1-yl)phenol                                                                                        | C20 H22 O4         | 7.232 |
| chromen-2-one                                                                                                                                                        | C13 H25 N O2       | 7.235 |
| (Z)-docos-13-enamide                                                                                                                                                 | C13 H20 O2         | 7.377 |
| Bicyclohexyliden-2-one                                                                                                                                               | C22 H26 O6         | 7.807 |
| Ethenylbenzene                                                                                                                                                       | C8 H8              | 7.807 |
| (4Z,6E,8S,10Z)-8-hydroxyhexadeca-4,6,10-trienoic acid                                                                                                                | C16 H26 O3         | 7.815 |
| 9H-Purin-6-amine                                                                                                                                                     | C20 H30 O5         | 7.96  |
| (3E,4S)-3-[2-[(1R,4aS,5R,6R,8aS)-6-hydroxy-5-(hydroxymethyl)-5,8a-dimethyl-2-methylidene-3,4,4a,6,7,8-hexahydro-1H-naphthalen-1-yl]ethylidene]-4-hydroxyoxolan-2-one | C39 H32 O14        | 7.965 |
| Unknown                                                                                                                                                              | C13 H25 F N8 O4 P2 | 7.965 |
| 5,7-dihydroxy-2-(4-hydroxyphenyl)-8-[3,4,5-trihydroxy-6-(hydroxymethyl)oxan-2-yl]-6-(3,4,5-trihydroxyoxan-2-yl)chromen-4-one                                         | C9 H6 O2           | 7.966 |
| 6-cyclohexyl-5-(cyclohexylimino)-4-thia-6-azaspiro[2.4]heptan-7-one                                                                                                  | C24 H24 O9         | 7.969 |
| (11E,15Z)-9,10,13-trihydroxyoctadeca-11,15-dienoic acid                                                                                                              | C18 H32 O5         | 7.971 |
| 6-O-[(2E)-3-(4-Hydroxyphenyl)-2-propenoyl]-1-O-[(2E)-3-phenyl-2-propenoyl]-β-D-glucopyranose                                                                         | C24 H24 O9         | 8.014 |
| chromen-2-one                                                                                                                                                        | C9 H6 O2           | 8.017 |
| 6-O-[(2E)-3-(4-Hydroxyphenyl)-2-propenoyl]-1-O-[(2E)-3-phenyl-2-propenoyl]-β-D-glucopyranose                                                                         | C24 H24 O9         | 8.065 |
| chromen-2-one                                                                                                                                                        | C9 H6 O2           | 8.065 |
| 6-O-[(2E)-3-(4-Hydroxyphenyl)-2-propenoyl]-1-O-[(2E)-3-phenyl-2-propenoyl]-β-D-glucopyranose                                                                         | C24 H24 O9         | 8.134 |
| chromen-2-one                                                                                                                                                        | C9 H6 O2           | 8.134 |
| Hexadecanoic acid                                                                                                                                                    | C16 H32 O2         | 8.206 |
| N,N-Dimethyldodecan-1-amine N-oxide                                                                                                                                  | C14 H31 N O        | 8.255 |
| (2S,3S,4R)-2-Aminooctadecane-1,3,4-triol                                                                                                                             | C18 H39 N O3       | 8.273 |
| 1-phenyldecan-1-one                                                                                                                                                  | C16 H35 N O3       | 8.315 |
| N,N-Dimethyldodecan-1-amine N-oxide                                                                                                                                  | C14 H31 N O        | 8.331 |
| 2-Aminohexadecanoic acid                                                                                                                                             | C16 H33 N O2       | 8.438 |
| Unknown                                                                                                                                                              | C32 H45 F O2 P2    | 8.473 |

|                                                                                                                                                                                                                                                 |                        |        |
|-------------------------------------------------------------------------------------------------------------------------------------------------------------------------------------------------------------------------------------------------|------------------------|--------|
| (5alpha,17alpha)-3,3-Difluoropregn-20-yn-17-ol                                                                                                                                                                                                  | C21 H30 F2 O           | 8.51   |
| N,N-bis(2-hydroxyethyl)dodecan-1-amine oxide                                                                                                                                                                                                    | C24 H30 O6             | 8.512  |
| 2-[1-(Aminomethyl)cyclohexyl]acetic acid                                                                                                                                                                                                        | C16 H33 N O            | 8.582  |
| N,N-Dimethyldodecan-1-amine N-oxide                                                                                                                                                                                                             | C14 H31 N O            | 8.772  |
| (9Z)-Hexadec-9-enoic acid                                                                                                                                                                                                                       | C16 H30 O2             | 9.139  |
| (9Z)-Hexadec-9-enoic acid                                                                                                                                                                                                                       | C16 H30 O2             | 9.213  |
| (2S,3R)-2-aminooctadecane-1,3-diol                                                                                                                                                                                                              | C18 H39 N O2           | 9.354  |
| NP-004713                                                                                                                                                                                                                                       | C15 H24 O2             | 9.368  |
| (3bS,5aS,7R,8R,10aR,10bS)-3b,4,5,6,7,8,9,10,10a,10b-Decahydro-7-hydroxy-10b-methyl-5a,8-Methano-5aH-cyclohepta(5,6)naphtho(2,1-b)furan-7-methanol                                                                                               | C20 H26 O3             | 9.371  |
| Unknown                                                                                                                                                                                                                                         | C31 H53 F3 N4 O        | 9.624  |
| (9Z,11E,13E)-Octadeca-9,11,13-trienoic acid                                                                                                                                                                                                     | C18 H30 O2             | 9.659  |
| Unknown                                                                                                                                                                                                                                         | C30 H57 F3 O5          | 9.696  |
| NP-014287                                                                                                                                                                                                                                       | C18 H32 O3             | 9.714  |
| Unknown                                                                                                                                                                                                                                         | C33 H56 N4 O3          | 9.798  |
| Unknown                                                                                                                                                                                                                                         | C32 H62 O7             | 9.866  |
| Apigenin 7- (3",6"-di-p-coumarylglucoside)                                                                                                                                                                                                      | C12 H18 O              | 9.878  |
| Unknown                                                                                                                                                                                                                                         | C20 H28 O3             | 9.878  |
| N-[[[(2R,4S,5R)-5-Vinyl-1-azabicyclo[2.2.2]oct-2-yl)methyl]cyclohexanecarboxamide                                                                                                                                                               | C17 H28 N2 O           | 9.878  |
| (9Z)-Hexadec-9-enoic acid                                                                                                                                                                                                                       | C16 H30 O2             | 9.878  |
| (9Z,11E,13S)-13-hydroperoxyoctadeca-9,11-dienoic acid                                                                                                                                                                                           | C18 H32 O4             | 9.949  |
| (9Z)-Hexadec-9-enoic acid                                                                                                                                                                                                                       | C16 H30 O2             | 9.949  |
| Unknown                                                                                                                                                                                                                                         | C34 H54 F2 N4          | 9.982  |
| (3bS,5aS,7R,8R,10aR,10bS)-7-(Hydroxymethyl)-10b-methyl-3b,4,5,6,7,8,9,10,10a,10b,11,12-dodecahydro-5a,8-methanocyclohepta[5,6]naphtho[2,1-b]furan-7-ol                                                                                          | C20 H28 O3             | 10.037 |
| N-[[[(2R,4S,5R)-5-Vinyl-1-azabicyclo[2.2.2]oct-2-yl)methyl]cyclohexanecarboxamide                                                                                                                                                               | C17 H28 N2 O           | 10.037 |
| (9Z)-Hexadec-9-enoic acid                                                                                                                                                                                                                       | C16 H30 O2             | 10.037 |
| Unknown                                                                                                                                                                                                                                         | C32 H62 O7             | 10.061 |
| 6-O-[(2E)-3-(4-Hydroxyphenyl)-2-propenoyl]-1-O-[(2E)-3-phenyl-2-propenoyl]-β-D-glucopyranose                                                                                                                                                    | C18 H30 O3             | 10.179 |
| (9Z)-Hexadec-9-enoic acid                                                                                                                                                                                                                       | C16 H30 O2             | 10.179 |
| N-[[[(2R,4S,5R)-5-Vinyl-1-azabicyclo[2.2.2]oct-2-yl)methyl]cyclohexanecarboxamide                                                                                                                                                               | C17 H28 N2 O           | 10.181 |
| NP-020014                                                                                                                                                                                                                                       | C15 H26 O3             | 10.229 |
| (9Z,12Z)-N-(2-hydroxyethyl)octadeca-9,12-dienamide                                                                                                                                                                                              | C20 H37 N O2           | 10.761 |
| Unknown                                                                                                                                                                                                                                         | C20 H31 F3 O6          | 10.874 |
| 4-[(1R,3S,5S,8R,9S,10R,11R,13R,14S,17R)-1,5,11,14-tetrahydroxy-10-(hydroxymethyl)-13-methyl-3-((2R,3R,4R,5R,6S)-3,4,5-trihydroxy-6-methyltetrahydro-2H-pyran-2-yloxy)hexadecahydro-1H-cyclopenta[a]phenanthren-17-yl]furan-2(5H)-one            | C29 H44 O12            | 10.948 |
| 3-[(3R,12Z,21S,22S)-16-ethenyl-11-ethyl-12-(hydroxymethylidene)-3-methoxycarbonyl-17,21,26-trimethyl-4-oxo-7,23,24,25-tetrazahexacyclo[18.2.1.15.8.110,13.115,18.02,6]hexacos-1,5(26),6,8,10,13(25),14,16,18(24),19-decaen-22-yl]propanoic acid | C35 H34 N4 O6          | 11.168 |
| Unknown                                                                                                                                                                                                                                         | C25 H39 F2 N           | 11.234 |
| N,N-bis(2-hydroxyethyl)hexadecanamide                                                                                                                                                                                                           | C18 H37 N O2           | 11.276 |
| 3-Methyl-1-phenyl-1,2-nonadiene                                                                                                                                                                                                                 | C19 H41 N3 O5          | 11.312 |
| 2-(methylamino)-1-phenylbutan-1-one                                                                                                                                                                                                             | C12 H15 Cl2 F2 N6 O2 P | 11.398 |
| 2-Hydroxy-N,N,N-trimethylethan-1-aminium                                                                                                                                                                                                        | C24 H41 N              | 11.42  |
| (9Z)-N-(2-Hydroxyethyl)octadec-9-enamide                                                                                                                                                                                                        | C20 H39 N O2           | 11.522 |
| Unknown                                                                                                                                                                                                                                         | C21 H42 F N O          | 11.623 |

|                                                                                                                                                                                                        |                       |        |
|--------------------------------------------------------------------------------------------------------------------------------------------------------------------------------------------------------|-----------------------|--------|
| Unknown                                                                                                                                                                                                | C24 H41 F2 N6 O4 P3   | 11.86  |
| methyl (1R,15S,17R,18R,19S,20S)-6,18-dimethoxy-17-(3,4,5-trimethoxybenzoyl)oxy-1,3,11,12,14,15,16,17,18,19,20,21-dodecahydroyohimban-19-carboxylate                                                    | C33 H40 N2 O9         | 11.86  |
| Unknown                                                                                                                                                                                                | C32 H49 F N3 O8 P     | 11.91  |
| Unknown                                                                                                                                                                                                | C40 H50 F3 N2 O3 P    | 11.91  |
| 5-hydroxy-3-methyl-N-{3-[(2R,5R)-5-{3-[(2E)-3-methyl-5-[[{(2S,3R,4R,5S,6S)-3,4,5-trihydroxy-6-(hydroxymethyl)oxan-2-yl]oxy}pent-2-enamido]propyl}-3,6-dioxopiperazin-2-yl]propyl}pent-2-enamide        | C28 H46 N4 O11        | 11.91  |
| 4-Oxo-3,4-dihydroquinazoline-2-carbohydrazide                                                                                                                                                          | C28 H32 N8 O8         | 12.147 |
| methyl (1R,15S,17R,18R,19S,20S)-6,18-dimethoxy-17-(3,4,5-trimethoxybenzoyl)oxy-1,3,11,12,14,15,16,17,18,19,20,21-dodecahydroyohimban-19-carboxylate                                                    | C33 H40 N2 O9         | 12.152 |
| 2-(dimethylamino)ethyl 3-cyclohexylpropanoate                                                                                                                                                          | C10 H30 O5 Si5        | 12.273 |
| 1-{2-[(11aS)-5-(4-Isopropylphenyl)-1,3-dioxo-5,6,11,11a-tetrahydro-1H-imidazo[1',5':1,6]pyrido[3,4-b]indol-2(3H)-yl]benzoyl}-4-piperidinecarboxylic acid                                               | C35 H34 N4 O5         | 12.344 |
| Unknown                                                                                                                                                                                                | C17 H43 F5 N10 O3 P2  | 12.36  |
| 2-(Allyl[4-[(2-ethyl-5,7-dimethyl-3H-imidazo[4,5-b]pyridin-3-yl)methyl]phenyl]amino)-2-phenyl-N-(phenylsulfonyl)acetamide                                                                              | C34 H35 N5 O3 S       | 12.363 |
| 3,6,9,12,15-Pentaoxaheptadecan-1,17-diol                                                                                                                                                               | C35 H36 N4 O5         | 12.365 |
| 3-[(3S,4S,21R)-14-Ethyl-21-(methoxycarbonyl)-4,8,13,18-tetramethyl-20-oxo-9-vinyl-3-phorbiny]propanoic acid                                                                                            | C35 H36 N4 O5         | 12.549 |
| Unknown                                                                                                                                                                                                | C20 H44 N6 O14        | 12.549 |
| N-[2-(3,4-Dimethoxyphenyl)ethyl]-2-({2-[2-(1-piperidinyl)ethyl][1,2,4]triazolo[1,5-c]quinazolin-5-yl)sulfonyl}acetamide                                                                                | C28 H34 N6 O3 S       | 12.702 |
| 1'-ethyl-5-[2'-methyl-4'-(5-methyl-1,3,4-oxadiazolyl-2-yl)biphenyl-4-carbonyl]-2,3,6,7-tetrahydrospiro(furo[2,3-f]indole-3,4'-piperidine)                                                              | C33 H34 N4 O3         | 12.705 |
| (2E,4S)-4-[(2-Oxohexadecanoyl)amino]-2-octenoic acid                                                                                                                                                   | C24 H43 N O4          | 12.802 |
| 1-isothiocyanatooctane                                                                                                                                                                                 | C9 H17 N S            | 12.947 |
| (1R,9S)-5-[(E)-2-(4-Chlorophenyl)vinyl]-11-(5-pyrimidinylcarbonyl)-7,11-diazatricyclo[7.3.1.02,7]trideca-2,4-dien-6-one                                                                                | C24 H21 Cl N4 O2      | 12.948 |
| N-[(2S,3R)-1,3-dihydroxyoctadecan-2-yl]dodecanamide                                                                                                                                                    | C30 H61 N O3          | 13.034 |
| Decamethylcyclopentasiloxane                                                                                                                                                                           | C10 H30 O5 Si5        | 13.091 |
| N-{4-[4-(4-Chlorophenyl)-1-piperazinyl]benzyl}-2-(dibenzo[b,d]thiophen-2-yl)imidazo[1,2-a]pyridine-3-carboxamide                                                                                       | C37 H30 Cl N5 O S     | 13.091 |
| Unknown                                                                                                                                                                                                | C26 H33 Cl F N7 O3 S2 | 13.462 |
| Unknown                                                                                                                                                                                                | C36 H57 F3 O3         | 13.484 |
| N-(2-Aminoethyl)-N'-(1,5-dicyclohexyl-3-pentanyl)-1,2-ethanediamine                                                                                                                                    | C21 H43 N3            | 13.635 |
| methyl (4aS,4bR,5aR,6aS,7R,9aS,9bR,10R)-4a,6a-dimethyl-2,5'-dioxo-2,4,4',4a,5',5a,6,6a,8,9,9a,9b,10,11-tetradecahydro-3H,3'H-spiro[cyclopenta[7,8]phenanthro[4b,5-b]oxirene-7,2'-furan]-10-carboxylate | C22 H43 N O           | 13.636 |
| Unknown                                                                                                                                                                                                | C34 H61 N O5          | 13.733 |
| NP-014287                                                                                                                                                                                              | C18 H32 O3            | 13.751 |
| Unknown                                                                                                                                                                                                | C44 H35 Cl2 F2 N O    | 13.757 |
| Unknown                                                                                                                                                                                                | C41 H78 F N O4 P2     | 13.78  |
| Unknown                                                                                                                                                                                                | C34 H57 F3 O3         | 13.946 |

**(b) dichloromethane/methanol extract.**

| Compound Name                                              | Formula           | RT [min] |
|------------------------------------------------------------|-------------------|----------|
| 4-methylpyridine-2,3-diamine                               | C6 H9 N3          | 1.027    |
| 5,7-Diisopropyl-1,1-dimethyl-1,2,3,4-tetrahydronaphthalene | C18 H28           | 1.028    |
| Unknown                                                    | C25 H53 F3 N4 O4  | 1.028    |
| Unknown                                                    | C3 H F4 P         | 1.028    |
| Unknown                                                    | C31 H31 Cl F N S2 | 1.028    |
| Unknown                                                    | C38 H65 F3 O4     | 1.028    |

|                                                                                                                                                                                                                                      |                     |       |
|--------------------------------------------------------------------------------------------------------------------------------------------------------------------------------------------------------------------------------------|---------------------|-------|
| Unknown                                                                                                                                                                                                                              | C5 H F2 O P         | 1.028 |
| Unknown                                                                                                                                                                                                                              | C51 H80 F2 O        | 1.028 |
| NP-020521                                                                                                                                                                                                                            | C18 H32 O2          | 1.028 |
| Unknown                                                                                                                                                                                                                              | C12 H12 Cl F N10 S2 | 1.029 |
| Unknown                                                                                                                                                                                                                              | C38 H71 N O6        | 1.029 |
| Unknown                                                                                                                                                                                                                              | C40 H75 N O6        | 1.029 |
| 2-acetamido-3-sulfanylpropanoic acid                                                                                                                                                                                                 | C5 H9 N O3 S        | 1.03  |
| 1-hydroxy-2,2,6,6-tetramethylpiperidin-4-ol                                                                                                                                                                                          | C9 H19 N O2         | 1.4   |
| 2,3-dihydroxybutanedihydrazide                                                                                                                                                                                                       | C4 H10 N4 O4        | 3.022 |
| 4-Hydroxyquinoline-2-carboxylic acid                                                                                                                                                                                                 | C10 H7 N O3         | 3.199 |
| Unknown                                                                                                                                                                                                                              | C3 H10 F2 N3 O2 P   | 3.264 |
| 4-Hydroxyquinoline-2-carboxylic acid                                                                                                                                                                                                 | C10 H7 N O3         | 3.265 |
| 1-BENZYL-4-PROPYLAMINO-4-PIPERIDINECARBOXAMIDE                                                                                                                                                                                       | C16 H25 N3 O        | 3.352 |
| Unknown                                                                                                                                                                                                                              | C15 H29 N5 O4       | 3.811 |
| 1-[[4-(2,5-dimethyl-1H-pyrrol-1-yl)benzoyl]oxy]dihydro-1H-pyrrole-2,5-dione                                                                                                                                                          | C17 H16 N2 O4       | 3.832 |
| Unknown                                                                                                                                                                                                                              | C17 H33 N5 O5       | 3.993 |
| Unknown                                                                                                                                                                                                                              | C18 H41 F3 N7 O4 P  | 4.622 |
| (2R,3S,4S,5S,6R)-2-((7-hydroxy-4-[(3Z)-5-hydroxy-3-methylpent-3-en-1-yl]-4a,8,8-trimethyl-3-methylidene-decahydronaphthalen-2-yl)oxy)-6-(hydroxymethyl)oxane-3,4,5-triol                                                             | C26 H44 O8          | 4.671 |
| 4-Isopropylbenzaldehyde                                                                                                                                                                                                              | C10 H12 O           | 5.42  |
| 2-(dibutylamino)ethanol                                                                                                                                                                                                              | C10 H23 N O         | 5.46  |
| 2-(Hydroxymethyl)-2-(octylamino)-1,3-propanediol                                                                                                                                                                                     | C12 H27 N O3        | 5.624 |
| 3,5,7-Trimethyl-1-azatricyclo[3.3.1.1~3,7~]decane-2,8-diol                                                                                                                                                                           | C12 H21 N O2        | 5.857 |
| (9aR,9bS)-9a-Hydroxy-6,9-dimethyl-3-methylene-3,3a,4,5,9a,9b-hexahydroazuleno[4,5-b]furan-2,7-dione                                                                                                                                  | C15 H16 O4          | 5.879 |
| Unknown                                                                                                                                                                                                                              | C21 H37 F4 N O9     | 5.887 |
| NP-018660                                                                                                                                                                                                                            | C13 H22 O3          | 6.128 |
| (11E,15Z)-9,10,13-trihydroxyoctadeca-11,15-dienoic acid                                                                                                                                                                              | C18 H32 O5          | 6.208 |
| 8-(4-oxo-5-pent-2-enylcyclopent-2-en-1-yl)octanoic acid                                                                                                                                                                              | C18 H28 O3          | 6.208 |
| 8-[(1S,5R)-4-oxo-5-[(Z)-pent-2-enyl]cyclopent-2-en-1-yl]octanoic acid                                                                                                                                                                | C18 H28 O3          | 6.208 |
| 4-[(1R,3S,5S,8R,9S,10R,11R,13R,14S,17R)-1,5,11,14-tetrahydroxy-10-(hydroxymethyl)-13-methyl-3-((2R,3R,4R,5R,6S)-3,4,5-trihydroxy-6-methyltetrahydro-2H-pyran-2-yloxy)hexadecahydro-1H-cyclopenta[a]phenanthren-17-yl]furan-2(5H)-one | C15 H23 N O3        | 6.334 |
| 5-(2-Ethoxyphenyl)-1-methyl-3-propyl-1,6-dihydro-7H-pyrazolo[4,3-d]pyrimidin-7-one                                                                                                                                                   | C17 H20 N4 O2       | 6.356 |
| Unknown                                                                                                                                                                                                                              | C16 H33 N O6        | 6.359 |
| chromen-2-one                                                                                                                                                                                                                        | C9 H6 O2            | 6.462 |
| 3-Butyl-3a,4,5,6-tetrahydro-2-benzofuran-1(3H)-one                                                                                                                                                                                   | C12 H18 O2          | 6.495 |
| (6S)-6-[(1Z)-But-1-en-1-yl]cyclohepta-1,4-diene                                                                                                                                                                                      | C11 H16             | 6.496 |
| (12Z)-9,10,11-trihydroxyoctadec-12-enoic acid                                                                                                                                                                                        | C18 H34 O5          | 6.498 |
| (9Z)-Hexadec-9-enoic acid                                                                                                                                                                                                            | C16 H30 O2          | 6.5   |
| (9Z,11E,13S)-13-hydroperoxyoctadeca-9,11-dienoic acid                                                                                                                                                                                | C18 H32 O4          | 6.501 |
| (4aR,9aS)-7-Ethynyl-4a,9a-dimethyl-1-methylene-2,3,4,4a,5,6,9,9a-octahydro-1H-benzo[7]annulene                                                                                                                                       | C16 H22             | 6.535 |
| 1-phenyldecan-1-one                                                                                                                                                                                                                  | C16 H24 O           | 6.535 |
| (S)-1-[3-(Dimethylamino)propyl]-1-(4-fluorophenyl)-1,3-dihydroisobenzofuran-5-carbonitrile                                                                                                                                           | C20 H21 F N2 O      | 6.535 |
| (9Z)-N-(2-Hydroxyethyl)octadec-9-enamide                                                                                                                                                                                             | C16 H26 O2          | 6.535 |
| (4Z,6E,8R,10Z)-8-hydroxyhexadeca-4,6,10-trienoic acid                                                                                                                                                                                | C16 H26 O3          | 6.541 |
| NP-020214                                                                                                                                                                                                                            | C16 H32 O4          | 6.636 |
| 2,6-di-tert-butyl-4-ethylphenol                                                                                                                                                                                                      | C16 H26 O           | 6.637 |

|                                                                                                                                                                                               |                    |       |
|-----------------------------------------------------------------------------------------------------------------------------------------------------------------------------------------------|--------------------|-------|
| NP-020014                                                                                                                                                                                     | C16 H32 O4         | 6.637 |
| 1-[(2-Hydroxyethyl)amino]-2-dodecanol                                                                                                                                                         | C14 H31 N O2       | 6.663 |
| 3-[2-carboxyethyl(dodecyl)amino]propanoic acid                                                                                                                                                | C18 H35 N O4       | 6.667 |
| 6-cyclohexyl-5-(cyclohexylimino)-4-thia-6-azaspiro[2.4]heptan-7-one                                                                                                                           | C17 H26 N2 O S     | 6.671 |
| NP-006888                                                                                                                                                                                     | C16 H28 O4         | 6.673 |
| (4Z,6E,8R,10Z)-8-hydroxyhexadeca-4,6,10-trienoic acid                                                                                                                                         | C16 H26 O3         | 6.674 |
| N,N-Dimethyldodecan-1-amine N-oxide                                                                                                                                                           | C12 H27 N O        | 6.692 |
| 1-hydroxy-2,2,6,6-tetramethylpiperidine (TEMPO) (TEMPO)                                                                                                                                       | C9 H19 N O         | 6.745 |
| (2S,3S,4R)-2-aminotetradecane-1,3,4-triol                                                                                                                                                     | C14 H31 N O3       | 6.789 |
| OPEO                                                                                                                                                                                          | C16 H26 O2         | 6.832 |
| (2Z)-2-Hepten-1-ylbenzene                                                                                                                                                                     | C13 H18            | 6.873 |
| 2-[1-(2H-1,3-benzodioxol-5-yl)propan-2-yl]-6-methoxy-4-(prop-2-en-1-yl)phenol                                                                                                                 | C20 H22 O4         | 6.876 |
| (E)-4-(2,6,6-trimethylcyclohexen-1-yl)but-3-en-2-one                                                                                                                                          | C13 H20 O          | 6.876 |
| Unknown                                                                                                                                                                                       | C32 H34 N3 P       | 6.876 |
| 2-(dimethylamino)ethyl 3-cyclohexylpropanoate                                                                                                                                                 | C13 H25 N O2       | 6.878 |
| NP-018660                                                                                                                                                                                     | C13 H22 O3         | 7.027 |
| Unknown                                                                                                                                                                                       | C16 H27 F3 O2      | 7.046 |
| (1R,4aS)-7-(2-Hydroxypropan-2-yl)-1,4a-dimethyl-9-oxo-3,4,10,10a-tetrahydro-2H-phenanthrene-1-carboxylic acid                                                                                 | C20 H26 O4         | 7.049 |
| Unknown                                                                                                                                                                                       | C10 H23 F N8 O     | 7.064 |
| 2-aminoethyl (allylamino)methanedithioate hydrochloride                                                                                                                                       | C6 H12 N2 S2       | 7.175 |
| Unknown                                                                                                                                                                                       | C13 H25 F N6 O5    | 7.25  |
| Unknown                                                                                                                                                                                       | C16 H29 F N2 O3 S2 | 7.25  |
| 5-hydroxy-3-methyl-N-[3-[(2R,5R)-5-[3-[(2E)-3-methyl-5-[(2S,3R,4R,5S,6S)-3,4,5-trihydroxy-6-(hydroxymethyl)oxan-2-yl]oxy]pent-2-enamido]propyl]-3,6-dioxopiperazin-2-yl]propyl]pent-2-enamide | C15 H26 O3         | 7.308 |
| NP-016596                                                                                                                                                                                     | C13 H22 O3         | 7.317 |
| NP-014287                                                                                                                                                                                     | C19 H30 O8         | 7.411 |
| 1-phenylethanone                                                                                                                                                                              | C8 H8 O            | 7.412 |
| 3-[(4R,7S,8aS)-7-[(Isopropylcarbamoyl)amino]-1-oxooctahydropyrrolo[1,2-a]pyrazin-4-yl]-N-(4-methoxybenzyl)propanamide                                                                         | C22 H33 N5 O4      | 7.414 |
| (2Z,4S,5S,6S,7R,8Z)-2,9-Diphenyldeca-2,8-diene-3,4,5,6,7,8-hexol                                                                                                                              | C22 H26 O6         | 7.415 |
| Unknown                                                                                                                                                                                       | C12 H34 N9 O4 P S  | 7.415 |
| Unknown                                                                                                                                                                                       | C22 H28 F5 N5      | 7.415 |
| (1S,2S,4R,8S,9S,11S,12R,13S,19S)-12,19-difluoro-11-hydroxy-8-(2-hydroxyacetyl)-6,6,9,13-tetramethyl-5,7-dioxapentacyclo[10.8.0.0.2,9.04,8.013,18]icosa-14,17-dien-16-one                      | C21 H26 F2 O6      | 7.415 |
| Ethenylbenzene                                                                                                                                                                                | C8 H8              | 7.415 |
| N,N'-(2-Hydroxy-1,3-propanediyl)dioctanamide                                                                                                                                                  | C19 H38 N2 O3      | 7.462 |
| [(3S,4S,6S)-3,4-dihydroxy-6-[5-hydroxy-2-(4-hydroxyphenyl)-4-oxochromen-7-yl]oxy-5-[(E)-3-(4-hydroxyphenyl)prop-2-enoyl]oxyoxan-2-yl]methyl (E)-3-(4-hydroxyphenyl)prop-2-enoate              | C39 H32 O14        | 7.537 |
| 8-[(1S,5R)-4-oxo-5-[(Z)-pent-2-enyl]cyclopent-2-en-1-yl]octanoic acid                                                                                                                         | C18 H28 O3         | 7.538 |
| (3E,4S)-3-[2-[(1R,4aS,5R,6R,8aS)-6-hydroxy-5-(hydroxymethyl)-5,8a-dimethyl-2-methylidene-3,4,4a,6,7,8-hexahydro-1H-naphthalen-1-yl]ethylidene]-4-hydroxyoxolan-2-one                          | C20 H30 O5         | 7.538 |
| N-(6-Amino-1-isobutyl-2,4-dioxo-1,2,3,4-tetrahydro-5-pyrimidinyl)-3-cyclohexyl-N-isobutylpropanamide                                                                                          | C21 H36 N4 O3      | 7.539 |
| 8-(4-oxo-5-pent-2-enylcyclopent-2-en-1-yl)octanoic acid                                                                                                                                       | C18 H28 O3         | 7.54  |
| Unknown                                                                                                                                                                                       | C13 H25 F N8 O4 P2 | 7.54  |
| 6-O-[(2E)-3-(4-Hydroxyphenyl)-2-propenoyl]-1-O-[(2E)-3-phenyl-2-propenoyl]-β-D-glucopyranose                                                                                                  | C24 H24 O9         | 7.544 |
| (E)-3-(2-hydroxyphenyl)prop-2-enoic acid (o-coumaric acid)                                                                                                                                    | C9 H8 O3           | 7.547 |
| N,N-Bis(2-hydroxyethyl)dodecanamide                                                                                                                                                           | C16 H33 N O3       | 7.548 |

|                                                                                                                                                                                  |                  |       |
|----------------------------------------------------------------------------------------------------------------------------------------------------------------------------------|------------------|-------|
| Unknown                                                                                                                                                                          | C28 H62 F N5 O8  | 7.572 |
| (E)-3-(2-hydroxyphenyl)prop-2-enoic acid                                                                                                                                         | C9 H8 O3         | 7.634 |
| (E)-3-(2-hydroxyphenyl)prop-2-enoic acid                                                                                                                                         | C9 H8 O3         | 7.694 |
| 6-O-[(2E)-3-(4-Hydroxyphenyl)-2-propenoyl]-1-O-[(2E)-3-phenyl-2-propenoyl]-β-D-glucopyranose                                                                                     | C24 H24 O9       | 7.694 |
| [(3S,4S,6S)-3,4-dihydroxy-6-[5-hydroxy-2-(4-hydroxyphenyl)-4-oxochromen-7-yl]oxy-5-[(E)-3-(4-hydroxyphenyl)prop-2-enoyl]oxyoxan-2-yl]methyl (E)-3-(4-hydroxyphenyl)prop-2-enoate | C39 H32 O14      | 7.694 |
| 8-(4-oxo-5-pent-2-enylcyclopent-2-en-1-yl)octanoic acid                                                                                                                          | C18 H28 O3       | 7.73  |
| (RS)-1-[2-(Allyloxy)phenoxy]-3-(isopropylamino)propan-2-ol                                                                                                                       | C16 H32 O2       | 7.763 |
| Unknown                                                                                                                                                                          | C15 H34 N2 O2    | 7.766 |
| N-[(2S,3S)-3-Fluoro-1-hydroxy-2-dodecanyl]hexanamide                                                                                                                             | C18 H36 F N O2   | 7.767 |
| N,N-Dimethyldodecan-1-amine N-oxide                                                                                                                                              | C14 H31 N O      | 7.805 |
| NP-018660                                                                                                                                                                        | C13 H22 O3       | 7.817 |
| C16 (2S,3S,4R)-2-Aminooctadecane-1,3,4-triol                                                                                                                                     | C16 H35 N O3     | 7.862 |
| Unknown                                                                                                                                                                          | C18 H29 F3 O4    | 7.905 |
| Unknown                                                                                                                                                                          | C15 H30 N2 O7 S  | 7.908 |
| (9Z)-Tetradec-9-enoic acid                                                                                                                                                       | C14 H26 O2       | 7.95  |
| 3-dodecoxypropan-1-amine                                                                                                                                                         | C15 H33 N O      | 7.957 |
| 3-hydroxy-N-(1-hydroxy-4-methylpentan-2-yl)-5-oxo-6-phenylhexanamide                                                                                                             | C18 H27 N O4     | 7.974 |
| 2-aminohexadecanoic acid                                                                                                                                                         | C16 H33 N O2     | 7.977 |
| 1-[2,6-Bis(4-ethylphenyl)-4,4a,8,8a-tetrahydro-[1,3]dioxino[5,4-d][1,3]dioxin-4-yl]ethane-1,2-diol                                                                               | C24 H30 O6       | 8.068 |
| (9Z,12Z,15Z)-N-(2-hydroxyethyl)octadeca-9,12,15-trienamide                                                                                                                       | C20 H35 N O2     | 8.097 |
| Hexadecanamide                                                                                                                                                                   | C16 H33 N O      | 8.113 |
| (9Z,12Z,15Z)-N-(2-hydroxyethyl)octadeca-9,12,15-trienamide                                                                                                                       | C20 H35 N O2     | 8.21  |
| N,N-Dimethyldodecan-1-amine N-oxide                                                                                                                                              | C14 H31 N O      | 8.287 |
| (4Z,6E,8R,10Z)-8-hydroxyhexadeca-4,6,10-trienoic acid                                                                                                                            | C16 H26 O3       | 8.383 |
| Unknown                                                                                                                                                                          | C21 H31 F O S    | 8.425 |
| (11E,15Z)-9,10,13-trihydroxyoctadeca-11,15-dienoic acid                                                                                                                          | C18 H32 O5       | 8.502 |
| (4E)-1-(4-Hydroxy-3-methoxyphenyl)dec-4-en-3-one                                                                                                                                 | C17 H24 O3       | 8.555 |
| 4,4-Difluoropregn-5-ene-3,20-dione                                                                                                                                               | C21 H28 F2 O2    | 8.602 |
| Unknown                                                                                                                                                                          | C18 H29 F3 O3    | 8.725 |
| (2S,3R)-2-aminooctadecane-1,3-diol                                                                                                                                               | C18 H39 N O2     | 8.831 |
| 8-(4-oxo-5-pent-2-enylcyclopent-2-en-1-yl)octanoic acid                                                                                                                          | C18 H28 O3       | 8.876 |
| (2R,3S,4R,2'R,3'S,4'R)-5,5'-(Cyclododecylimino)di(1,2,3,4-pentanetetrol) (non-preferred name)                                                                                    | C22 H45 N O8     | 8.948 |
| 3,5-di-tert-butyl-4-hydroxybenzaldehyde                                                                                                                                          | C15 H22 O2       | 8.956 |
| 8-(4-oxo-5-pent-2-enylcyclopent-2-en-1-yl)octanoic acid                                                                                                                          | C18 H28 O3       | 8.985 |
| 8-[(1S,5R)-4-oxo-5-[(Z)-pent-2-enyl]cyclopent-2-en-1-yl]octanoic acid                                                                                                            | C18 H28 O3       | 8.987 |
| Unknown                                                                                                                                                                          | C39 H31 F2 N5 O2 | 9.051 |
| Unknown                                                                                                                                                                          | C33 H59 F O3 S   | 9.159 |
| NP-020214                                                                                                                                                                        | C18 H32 O3       | 9.162 |
| Unknown                                                                                                                                                                          | C32 H60 O7       | 9.259 |
| Unknown                                                                                                                                                                          | C32 H62 O7       | 9.317 |
| Unknown                                                                                                                                                                          | C18 H38 F N O    | 9.323 |
| Unknown                                                                                                                                                                          | C12 H27 F3 N4 S  | 9.337 |
| 7-[(2E)-3,7-Dimethyl-2,6-octadien-1-yl]-6-(methoxyamino)-9-methyl-9H-purin-7-ium                                                                                                 | C17 H26 N5 O     | 9.341 |
| (3bS,5aS,7R,8R,10aR,10bS)-7-(Hydroxymethyl)-10b-methyl-3b,4,5,6,7,8,9,10,10a,10b,11,12-dodecahydro-5a,8-methanocyclohepta[5,6]naphtho[2,1-b]furan-7-ol                           | C20 H28 O3       | 9.341 |
| 2-cyclohexylidenecyclohexan-1-one                                                                                                                                                | C12 H18 O        | 9.342 |

|                                                                                                                                                                                                                                      |                    |        |
|--------------------------------------------------------------------------------------------------------------------------------------------------------------------------------------------------------------------------------------|--------------------|--------|
| N-[[[(2R,4S,5R)-5-Vinyl-1-azabicyclo[2.2.2]oct-2-yl)methyl]cyclohexanecarboxamide                                                                                                                                                    | C17 H28 N2 O       | 9.342  |
| (9Z)-Hexadec-9-enoic acid                                                                                                                                                                                                            | C16 H30 O2         | 9.342  |
| NP-014287                                                                                                                                                                                                                            | C18 H32 O3         | 9.345  |
| N-methyl-N-octyloctan-1-amine                                                                                                                                                                                                        | C17 H37 N          | 9.398  |
| (9Z)-Hexadec-9-enoic acid                                                                                                                                                                                                            | C16 H30 O2         | 9.405  |
| (9Z,11E,13S)-13-hydroperoxyoctadeca-9,11-dienoic acid                                                                                                                                                                                | C18 H32 O4         | 9.406  |
| Unknown                                                                                                                                                                                                                              | C37 H36 F2 N3 O2 P | 9.431  |
| Unknown                                                                                                                                                                                                                              | C12 H31 Cl N6      | 9.489  |
| (3bS,5aS,7R,8R,10aR,10bS)-7-(Hydroxymethyl)-10b-methyl-3b,4,5,6,7,8,9,10,10a,10b,11,12-dodecahydro-5a,8-methanocyclohepta[5,6]naphtho[2,1-b]furan-7-ol                                                                               | C20 H28 O3         | 9.489  |
| N-[[[(2R,4S,5R)-5-Vinyl-1-azabicyclo[2.2.2]oct-2-yl)methyl]cyclohexanecarboxamide                                                                                                                                                    | C17 H28 N2 O       | 9.489  |
| (9Z)-Hexadec-9-enoic acid                                                                                                                                                                                                            | C16 H30 O2         | 9.489  |
| Unknown                                                                                                                                                                                                                              | C32 H62 O7         | 9.498  |
| Unknown                                                                                                                                                                                                                              | C25 H49 N5 O3      | 9.515  |
| Unknown                                                                                                                                                                                                                              | C24 H54 F N5 O5    | 9.557  |
| Unknown                                                                                                                                                                                                                              | C12 H31 Cl N6      | 9.615  |
| [(1E,4E)-5,9-Dimethyl-1,4,8-decatrien-1-yl]benzene                                                                                                                                                                                   | C18 H24            | 9.618  |
| (3bS,5aS,7R,8R,10aR,10bS)-7-(Hydroxymethyl)-10b-methyl-3b,4,5,6,7,8,9,10,10a,10b,11,12-dodecahydro-5a,8-methanocyclohepta[5,6]naphtho[2,1-b]furan-7-ol                                                                               | C20 H28 O3         | 9.618  |
| N-[[[(2R,4S,5R)-5-Vinyl-1-azabicyclo[2.2.2]oct-2-yl)methyl]cyclohexanecarboxamide                                                                                                                                                    | C17 H28 N2 O       | 9.619  |
| Hexadecanoic acid                                                                                                                                                                                                                    | C16 H30 O2         | 9.619  |
| (9Z)-Hexadec-9-enoic acid                                                                                                                                                                                                            | C16 H30 O2         | 9.619  |
| (4E)-1-(4-Hydroxy-3-methoxyphenyl)dec-4-en-3-one                                                                                                                                                                                     | C17 H24 O3         | 9.658  |
| 9-{3-[(4-Cyclohexylbutanoyl)amino]-3-deoxy-beta-D-xylofuranosyl}-9H-purin-6-amine                                                                                                                                                    | C20 H30 N6 O4      | 9.66   |
| (Z)-N-hydroxy-11-methyldodec-2-enamide                                                                                                                                                                                               | C13 H25 N O2       | 9.696  |
| (9Z)-N-(2-Hydroxyethyl)octadec-9-enamide                                                                                                                                                                                             | C20 H39 N O2       | 9.696  |
| (5Z,9Z,12Z)-Octadeca-5,9,12-trienoic acid ethyl ester                                                                                                                                                                                | C20 H34 O2         | 9.698  |
| (Z)-N-hydroxy-11-methyldodec-2-enamide                                                                                                                                                                                               | C13 H25 N O2       | 9.748  |
| Unknown                                                                                                                                                                                                                              | C20 H36 F3 N O     | 9.828  |
| N-(9-oxodecyl)acetamide                                                                                                                                                                                                              | C12 H23 N O2       | 9.828  |
| Octamethyl-1,3,5,7,2,4,6,8-tetroxatetrasilocane                                                                                                                                                                                      | C20 H39 N O2       | 9.829  |
| (5Z,9Z,12Z)-Octadeca-5,9,12-trienoic acid ethyl ester                                                                                                                                                                                | C20 H34 O2         | 9.833  |
| N-[(2S,3R,4E)-1-[(5R)-5-Ethyl-alpha-L-arabinopyranosyl]oxy]-3-hydroxy-4-octadecen-2-yl]heptanamide                                                                                                                                   | C32 H61 N O7       | 9.916  |
| 5-(but-3-en-1-yl)-3-propyldihydrofuran-2(3H)-one                                                                                                                                                                                     | C11 H18 O2         | 9.921  |
| Unknown                                                                                                                                                                                                                              | C20 H36 F3 N O     | 9.922  |
| 3-methyl-2-[(2Z)-pent-2-en-1-yl]cyclopent-2-en-1-one                                                                                                                                                                                 | C11 H16 O          | 9.922  |
| (9Z)-N-(2-Hydroxyethyl)octadec-9-enamide                                                                                                                                                                                             | C20 H39 N O2       | 9.924  |
| (5Z,9Z,12Z)-Octadeca-5,9,12-trienoic acid                                                                                                                                                                                            | C20 H34 O2         | 9.928  |
| NP-014287                                                                                                                                                                                                                            | C18 H32 O3         | 9.962  |
| 1,2,3,4,5-Pentamethylbenzene                                                                                                                                                                                                         | C18 H30 O2         | 9.963  |
| 4-[(2-Methyl-4-quinolinyl)methoxy]-N-([2,4,6-trioxo-5-[4-(3-pyridinylcarbonyl)-1-piperazinyl]hexahydro-5-pyrimidinyl)methyl]benzamide                                                                                                | C33 H31 N7 O6      | 10.008 |
| 4-[(1R,3S,5S,8R,9S,10R,11R,13R,14S,17R)-1,5,11,14-tetrahydroxy-10-(hydroxymethyl)-13-methyl-3-((2R,3R,4R,5R,6S)-3,4,5-trihydroxy-6-methyltetrahydro-2H-pyran-2-yloxy)hexadecahydro-1H-cyclopenta[a]phenanthren-17-yl]furan-2(5H)-one | C29 H44 O12        | 10.008 |
| Unknown                                                                                                                                                                                                                              | C38 H35 F2 N O5    | 10.017 |

|                                                                                                                                                     |                    |        |
|-----------------------------------------------------------------------------------------------------------------------------------------------------|--------------------|--------|
| Unknown                                                                                                                                             | C27 H50 F2 N3 O P  | 10.078 |
| (2E,4E)-11-Methoxy-3,7,11-trimethyl-2,4-dodecadienamide                                                                                             | C16 H29 N O2       | 10.132 |
| (5alpha,7alpha)-3-Amino-20-methylpregnan-7-ol                                                                                                       | C22 H39 N O        | 10.134 |
| N-(8Z,11Z,14Z-eicosatrienoyl)-ethanolamine                                                                                                          | C22 H39 N O2       | 10.136 |
| Unknown                                                                                                                                             | C22 H38 F3 N O     | 10.14  |
| (9Z,12Z)-N-(2-hydroxyethyl)octadeca-9,12-dienamide                                                                                                  | C20 H37 N O2       | 10.163 |
| 2-{2-[2-(Dodecyloxy)ethoxy]ethoxy}ethanol                                                                                                           | C18 H38 O4         | 10.201 |
| (2E,4E)-N-Isobutyl-2,4-octadecadienamide                                                                                                            | C22 H41 N O        | 10.258 |
| Unknown                                                                                                                                             | C19 H39 O4 P3      | 10.266 |
| Unknown                                                                                                                                             | C19 H30 F2         | 10.317 |
| OPEO                                                                                                                                                | C29 H44 O12        | 10.322 |
| 4-[(2-Methyl-4-quinolinyl)methoxy]-N-({2,4,6-trioxo-5-[4-(3-pyridinylcarbonyl)-1-piperazinyl]hexahydro-5-pyrimidinyl)methyl}benzamide               | C33 H31 N7 O6      | 10.323 |
| Unknown                                                                                                                                             | C30 H59 N O P2     | 10.418 |
| Unknown                                                                                                                                             | C28 H53 N O2 S     | 10.428 |
| methyl (1R,15S,17R,18R,19S,20S)-6,18-dimethoxy-17-(3,4,5-trimethoxybenzoyl)oxy-1,3,11,12,14,15,16,17,18,19,20,21-dodecahydroyohimban-19-carboxylate | C19 H36 O3         | 10.431 |
| Unknown                                                                                                                                             | C20 H46 F N5 O3    | 10.435 |
| 2-(dimethylamino)ethyl 3-cyclohexylpropanoate                                                                                                       | C13 H25 N O2       | 10.449 |
| Unknown                                                                                                                                             | C19 H41 N          | 10.476 |
| N,S-Ditrityl-L-cysteine                                                                                                                             | C41 H35 N O2 S     | 10.52  |
| Unknown                                                                                                                                             | C31 H38 F3 N2 O5 P | 10.525 |
| (4S,5S)-4-Methyl-5-undecyl-1,3-oxazolidin-2-one                                                                                                     | C15 H29 N O2       | 10.546 |
| 1-Methyl-2-propylpiperidine                                                                                                                         | C9 H19 N           | 10.59  |
| 1,4-Cyclohexadiene                                                                                                                                  | C6 H8              | 10.59  |
| 1,2,7,7-tetramethylbicyclo[2.2.1]hept-2-ene                                                                                                         | C11 H18            | 10.59  |
| N-[2-[2-(2-Aminoethoxy)ethoxy]ethyl]octadecanamide                                                                                                  | C24 H50 N2 O3      | 10.59  |
| (5alpha,7alpha)-3-Amino-20-methylpregnan-7-ol                                                                                                       | C22 H39 N O        | 10.591 |
| (9Z)-1-(4-Morpholinyl)-9-octadecen-1-one                                                                                                            | C22 H41 N O2       | 10.591 |
| 1-Dodecyl-5-hexyl-1H-imidazol-2-amine                                                                                                               | C21 H41 N3         | 10.591 |
| [(E)-hept-1-enyl]benzene                                                                                                                            | C13 H18            | 10.591 |
| 1-Oxa-4-azacyclohexadecan-16-one                                                                                                                    | C14 H27 N O2       | 10.591 |
| (3,4-dimethylphenyl)methanol                                                                                                                        | C9 H12 O           | 10.591 |
| 4,10-dihydroxy-10-methyl-dodecan-4-olide                                                                                                            | C13 H24 O3         | 10.591 |
| (E)-4-(2,6,6-trimethylcyclohexen-1-yl)but-3-en-2-one                                                                                                | C13 H20 O          | 10.591 |
| Unknown                                                                                                                                             | C16 H38 F N5 O     | 10.591 |
| Unknown                                                                                                                                             | C50 H84 F2 O       | 10.591 |
| Cyclohexanecarboxamide, N-ethyl-5-methyl-2-(1-methylethyl)-                                                                                         | C13 H25 N O        | 10.591 |
| 2-(dimethylamino)ethyl 3-cyclohexylpropanoate                                                                                                       | C13 H25 N O2       | 10.591 |
| Ethyl (8Z,11Z,14Z)-icosa-8,11,14-trienoate                                                                                                          | C22 H38 O2         | 10.591 |
| [(3E)-6-Methyl-3-hepten-1-yl]benzene                                                                                                                | C14 H20            | 10.592 |
| 1-(3,3,5-Trimethyl-1-cyclohexen-1-yl)-4-penten-1-one                                                                                                | C14 H22 O          | 10.592 |
| 1-ethenyl-2,4-dimethylbenzene                                                                                                                       | C10 H12            | 10.592 |
| (9Z)-Hexadec-9-enoic acid                                                                                                                           | C18 H37 N O2       | 10.635 |
| octadec-9-ynoic acid                                                                                                                                | C8 H24 O4 Si4      | 10.644 |
| 2,2,4,4,6,6,8,8,10,10,12,12-dodecamethyl-1,3,5,7,9,11-hexaoxa-2,4,6,8,10,12-hexasilacyclododecane                                                   | C12 H36 O6 Si6     | 10.648 |
| 2-cyclohexylidenecyclohexan-1-one                                                                                                                   | C12 H18 O          | 10.658 |
| Unknown                                                                                                                                             | C45 H87 F2 O4 P    | 10.658 |
| (9Z)-1-(4-Morpholinyl)-9-octadecen-1-one                                                                                                            | C22 H41 N O2       | 10.659 |
| 1,4-Cyclohexadiene                                                                                                                                  | C6 H8              | 10.661 |
| [(E)-hept-1-enyl]benzene                                                                                                                            | C13 H18            | 10.661 |

|                                                                                                                                                       |                      |        |
|-------------------------------------------------------------------------------------------------------------------------------------------------------|----------------------|--------|
| 4,10-dihydroxy-10-methyl-dodecan-4-olide                                                                                                              | C13 H24 O3           | 10.661 |
| Unknown                                                                                                                                               | C16 H38 F N5 O       | 10.661 |
| Cyclohexene                                                                                                                                           | C6 H10               | 10.661 |
| (2E)-3,7-Dimethylocta-2,6-dien-1-yl acetate                                                                                                           | C12 H20 O2           | 10.661 |
| N-[1-(1,4'-Bipiperidin-1'-yl)-3-methyl-1-oxo-2-butanyl]-4-methylcyclohexanecarboxamide                                                                | C23 H41 N3 O2        | 10.661 |
| N,N-bis(2-hydroxyethyl)hexadecanamide                                                                                                                 | C10 H14              | 10.661 |
| 1-Methyl-2-propylpiperidine                                                                                                                           | C9 H19 N             | 10.662 |
| (5alpha,7alpha)-3-Amino-20-methylpregnan-7-ol                                                                                                         | C22 H39 N O          | 10.662 |
| (9Z)-N-[(3R)-2-Oxo-3-azepanyl]-9-octadecanamide                                                                                                       | C24 H44 N2 O2        | 10.662 |
| (Z)-N-hydroxy-11-methyldodec-2-enamide                                                                                                                | C13 H25 N O2         | 10.662 |
| 1-Dodecyl-5-hexyl-1H-imidazol-2-amine                                                                                                                 | C21 H41 N3           | 10.662 |
| 1,2,7,7-tetramethylbicyclo[2.2.1]hept-2-ene                                                                                                           | C11 H18              | 10.662 |
| (E)-4-(2,6,6-trimethylcyclohexen-1-yl)but-3-en-2-one                                                                                                  | C13 H20 O            | 10.662 |
| Cyclohexanecarboxamide, N-ethyl-5-methyl-2-(1-methylethyl)-                                                                                           | C13 H25 N O          | 10.662 |
| Ethyl (8Z,11Z,14Z)-icosa-8,11,14-trienoate                                                                                                            | C22 H38 O2           | 10.662 |
| N-(9-oxodecyl)acetamide                                                                                                                               | C12 H23 N O2         | 10.662 |
| N-{2-[2-(2-Aminoethoxy)ethoxy]ethyl}octadecanamide                                                                                                    | C24 H50 N2 O3        | 10.662 |
| 1-methyl-4-propan-2-ylbenzene                                                                                                                         | C11 H16              | 10.663 |
| (1,3-dimethyl-4-phenylpiperidin-4-yl) propanoate                                                                                                      | C16 H23 N O2         | 10.664 |
| Unknown                                                                                                                                               | C29 H38 F4 O9        | 10.712 |
| N,S-Ditrityl-L-cysteine                                                                                                                               | C41 H35 N O2 S       | 10.712 |
| Unknown                                                                                                                                               | C21 H42 F N O        | 10.726 |
| Unknown                                                                                                                                               | C16 H38 F N5 O2      | 10.741 |
| (9Z)-1-(4-Morpholinyl)-9-octadecen-1-one                                                                                                              | C22 H41 N O2         | 10.743 |
| N-(2-hydroxyethyl)-N-methyloctadecanamide                                                                                                             | C21 H43 N O2         | 10.744 |
| 8-Bromo-2-(3-pyridinylcarbonyl)-1,3,4,12a-tetrahydropyrazino[2,1-c][1,4]benzodiazepine-6,12(2H,11H)-dione                                             | C18 H15 Br N4 O3     | 10.747 |
| Unknown                                                                                                                                               | C19 H40 O4           | 10.786 |
| N-[(E,2S,3R)-1,3-dihydroxyoctadec-4-en-2-yl]acetamide                                                                                                 | C20 H39 N O3         | 10.802 |
| (2R,3R,4S)-1-Butyl-2-[[[(9Z)-9-octadecen-1-yloxy]methyl]-3,4-pyrrolidinediol                                                                          | C27 H53 N O3         | 10.854 |
| N-(2-Hydroxyethyl)-9-octadecanamide                                                                                                                   | C20 H39 N O2         | 10.863 |
| cis-N-Butyl-4-(4-octylphenyl)cyclohexanamine                                                                                                          | C24 H41 N            | 10.911 |
| (9Z)-1-(4-Morpholinyl)-9-octadecen-1-one                                                                                                              | C22 H41 N O2         | 10.981 |
| Unknown                                                                                                                                               | C31 H57 N O6         | 11.026 |
| (9Z)-1-(4-Morpholinyl)-9-octadecen-1-one                                                                                                              | C22 H41 N O2         | 11.076 |
| (Z)-N-(2-hydroxyethyl)icos-11-enamide                                                                                                                 | C22 H43 N O2         | 11.129 |
| methyl (1R,15S,17R,18R,19S,20S)-6,18-dimethoxy-17-(3,4,5-trimethoxybenzoyl)oxy-1,3,11,12,14,15,16,17,18,19,20,21-dodecahydroyohimban-19-carboxylate   | C33 H40 N2 O9        | 11.164 |
| Unknown                                                                                                                                               | C24 H41 F2 N6 O4 P3  | 11.165 |
| Unknown                                                                                                                                               | C32 H57 F3 N3 O3 P3  | 11.194 |
| Unknown                                                                                                                                               | C23 H46 F5 N10 O P S | 11.196 |
| Unknown                                                                                                                                               | C27 H38 F2 N10 O4 S  | 11.197 |
| Unknown                                                                                                                                               | C33 H53 N O8 P2      | 11.197 |
| N-[2-(Diethylamino)ethyl]-2-{6-[2-(2,3-difluorophenyl)ethyl]-2,3-dimethyl-4-oxo-1(4H)-pyridinyl]-N-[[4'-(trifluoromethyl)-4-biphenyl]methyl]acetamide | C37 H40 F5 N3 O2     | 11.197 |
| NP-018660                                                                                                                                             | C28 H46 N4 O11       | 11.197 |
| hexadecyl(trimethyl)azanium                                                                                                                           | C19 H41 N            | 11.208 |
| Unknown                                                                                                                                               | C24 H46 N2 O2        | 11.286 |
| N-[(Benzyloxy)carbonyl]-L-valyl-N-[(2S)-4-[(4-benzyl-5-oxo-2,5-dihydro-furanyl)oxy]-1-carboxy-3-oxo-2-butanyl]-L-alaninamide                          | C32 H37 N3 O10       | 11.292 |
| (Z)-N-(2-hydroxyethyl)icos-11-enamide                                                                                                                 | C22 H43 N O2         | 11.298 |
| Unknown                                                                                                                                               | C30 H51 F O8 P2      | 11.33  |

|                                                                                                                                                                            |                        |        |
|----------------------------------------------------------------------------------------------------------------------------------------------------------------------------|------------------------|--------|
| Unknown                                                                                                                                                                    | C21 H45 N3 O5          | 11.361 |
| Unknown                                                                                                                                                                    | C36 H77 N7 O P2        | 11.361 |
| Unknown                                                                                                                                                                    | C45 H70 O5             | 11.362 |
| (4S,5S)-4-Methyl-5-undecyl-1,3-oxazolidin-2-one                                                                                                                            | C15 H29 N O2           | 11.373 |
| (1S,4S,5aS,9aS)-1,7,7-Tributyl-4-(hydroxymethyl)-5a-methyldecahydro-2H-3-benzazepin-2-one                                                                                  | C24 H45 N O2           | 11.391 |
| (2E,4E)-N-(2-methylpropyl)icosa-2,4-dienamide                                                                                                                              | C24 H45 N O            | 11.393 |
| Unknown                                                                                                                                                                    | C19 H41 F6 N6 O3 P3    | 11.431 |
| (5Z,9Z,12Z)-Octadeca-5,9,12-trienoic acid ethyl ester                                                                                                                      | C33 H40 N2 O9          | 11.431 |
| Unknown                                                                                                                                                                    | C25 H29 Cl N9 P S      | 11.543 |
| (Z)-N-hydroxy-11-methyldodec-2-enamide                                                                                                                                     | C13 H25 N O2           | 11.58  |
| 1,1,6-Trimethyl-1,2-dihydronaphthalene                                                                                                                                     | C13 H16                | 11.58  |
| 1,3-Di(propan-2-yl)benzene                                                                                                                                                 | C12 H18                | 11.58  |
| [(E)-hept-1-enyl]benzene                                                                                                                                                   | C13 H18                | 11.58  |
| 5,5-Bis(methylperoxy)nonane                                                                                                                                                | C11 H24 O4             | 11.58  |
| (E)-4-(2,6,6-trimethylcyclohexen-1-yl)but-3-en-2-one                                                                                                                       | C13 H20 O              | 11.58  |
| Unknown                                                                                                                                                                    | C44 H85 F2 N4 O2 P     | 11.58  |
| (1RS,6SR,10SR)-6,10-dimethylbicyclo[4.4.0]decan-3-one                                                                                                                      | C12 H20 O              | 11.581 |
| 12-Aminododecyl 2,6-diamino-2,6-dideoxy-beta-D-glucopyranoside                                                                                                             | C18 H39 N3 O4          | 11.581 |
| Unknown                                                                                                                                                                    | C19 H41 N3 O6          | 11.581 |
| exo-1,7,7-Trimethylbicyclo(2.2.1)hept-2-yl acrylate                                                                                                                        | C13 H20 O2             | 11.581 |
| Azacyclotridecan-2-one                                                                                                                                                     | C12 H23 N O            | 11.581 |
| N-[(2S)-4-[(5-Chloro-2-pyridinyl)amino]-1,4-dioxo-1-(1-piperidinyl)-2-butanyl]-2'-[[2-methoxyethyl](methyl)amino]methyl]-4-biphenylcarboxamide                             | C32 H38 Cl N5 O4       | 11.619 |
| Unknown                                                                                                                                                                    | C20 H44 N6 O14         | 11.62  |
| Unknown                                                                                                                                                                    | C15 H39 F4 N10 O2 P3 S | 11.622 |
| Methyl 3-({3-[4-(methoxycarbonyl)-4-phenyl-1-piperidinyl]propyl}carbamoyl)-6-methyl-4-(4-nitrophenyl)-2-oxo-1,2,3,4-tetrahydro-5-pyrimidinecarboxylate                     | C30 H35 N5 O8          | 11.622 |
| 2-[[[(5S,6R,9S)-14-[[2-(fluoroanilino)-oxomethyl]amino]-5-methoxy-3,6,9-trimethyl-2-oxo-11-oxa-3,8-diazabicyclo[10.4.0]hexadeca-1(12),13,15-trien-8-yl]methyl]benzoic acid | C32 H37 F N4 O6        | 11.623 |
| Unknown                                                                                                                                                                    | C25 H42 F N S          | 11.717 |
| (1RS,6SR,10SR)-6,10-dimethylbicyclo[4.4.0]decan-3-one                                                                                                                      | C12 H20 O              | 11.718 |
| (2Z)-2-Hepten-1-ylbenzene                                                                                                                                                  | C13 H18                | 11.718 |
| (Z)-N-hydroxy-11-methyldodec-2-enamide                                                                                                                                     | C13 H25 N O2           | 11.718 |
| 1,3-Di(propan-2-yl)benzene                                                                                                                                                 | C12 H18                | 11.718 |
| hept-2-ynylbenzene                                                                                                                                                         | C13 H16                | 11.718 |
| 5,5-Bis(methylperoxy)nonane                                                                                                                                                | C11 H24 O4             | 11.718 |
| (E)-4-(2,6,6-trimethylcyclohexen-1-yl)but-3-en-2-one                                                                                                                       | C13 H20 O              | 11.718 |
| Unknown                                                                                                                                                                    | C53 H83 F O2           | 11.718 |
| exo-1,7,7-Trimethylbicyclo(2.2.1)hept-2-yl acrylate                                                                                                                        | C13 H20 O2             | 11.718 |
| Azacyclotridecan-2-one                                                                                                                                                     | C12 H23 N O            | 11.718 |
| (3R,4E)-5-(4-methoxy-5-methyl-6-oxopyran-2-yl)-3-methylhex-4-enoate                                                                                                        | C13 H24 O4             | 11.718 |
| Unknown                                                                                                                                                                    | C29 H57 N O3           | 11.753 |
| 3-Ethyl-N-[(2S,3R)-3-hydroxy-1-phenyl-4-[[3-(trifluoromethyl)benzyl]amino]-2-butanyl]-7-(2-oxo-1-pyrrolidinyl)-1H-indole-5-carboxamide                                     | C33 H35 F3 N4 O3       | 11.797 |
| N-[(2S)-4-[(5-Chloro-2-pyridinyl)amino]-1,4-dioxo-1-(1-piperidinyl)-2-butanyl]-2'-[[2-methoxyethyl](methyl)amino]methyl]-4-biphenylcarboxamide                             | C32 H38 Cl N5 O4       | 11.797 |
| Unknown                                                                                                                                                                    | C4 H5 F2 N O5          | 11.865 |

|                                                                                                                                                         |                       |        |
|---------------------------------------------------------------------------------------------------------------------------------------------------------|-----------------------|--------|
| methyl (1R,15S,17R,18R,19S,20S)-6,18-dimethoxy-17-(3,4,5-trimethoxybenzoyloxy)-1,3,11,12,14,15,16,17,18,19,20,21-dodecahydroyohimban-19-carboxylate     | C33 H40 N2 O9         | 11.914 |
| N-[(1-[[[(4S)-3-[(2-Methyl-2-propanyl)oxy]carbonyl]-1,3-thiazolidin-4-yl]carbonyl]-4-phenyl-4-piperidiny]carbonyl]-L-leucine                            | C27 H39 N3 O6 S       | 11.94  |
| 1'-ethyl-5-[2'-methyl-4'-(5-methyl-1,3,4-oxadiazolyl-2-yl)biphenyl-4-carbonyl]-2,3,6,7-tetrahydrospiro(furo[2,3-f]indole-3,4'-piperidine)octadecanamide | C33 H34 N4 O3         | 11.94  |
| N-(2-Hydroxyethyl)octadecanamide                                                                                                                        | C18 H37 N O           | 11.981 |
| Unknown                                                                                                                                                 | C20 H41 N O2          | 12.043 |
| (1R,9S)-5-[(E)-2-(4-Chlorophenyl)vinyl]-11-(5-pyrimidinylcarbonyl)-7,11-diazatricyclo[7.3.1.02,7]trideca-2,4-dien-6-one                                 | C21 H45 N             | 12.113 |
| Unknown                                                                                                                                                 | C24 H21 Cl N4 O2      | 12.16  |
| (2E,4E)-N-Isobutyl-2,4-octadecadienamide                                                                                                                | C10 H23 F2 N6 O7 P S2 | 12.16  |
| N-[(2S,3R)-1,3-dihydroxyoctadecan-2-yl]dodecanamide                                                                                                     | C22 H41 N O           | 12.184 |
| Unknown                                                                                                                                                 | C30 H61 N O3          | 12.247 |
| Unknown                                                                                                                                                 | C39 H81 F N9 O P      | 12.264 |
| Unknown                                                                                                                                                 | C42 H85 F N2 O P2 S   | 12.265 |
| Unknown                                                                                                                                                 | C42 H27 Cl F N3       | 12.292 |
| Unknown                                                                                                                                                 | C23 H49 N             | 12.305 |
| Unknown                                                                                                                                                 | C37 H43 Cl F N S4     | 12.5   |
| Unknown                                                                                                                                                 | C4 H5 F2 N O5         | 12.661 |
| Unknown                                                                                                                                                 | C29 H37 F N6          | 12.743 |
| N,N-Dimethyloctadecanamide                                                                                                                              | C20 H41 N O           | 12.782 |
| 2-Octadecylfuran                                                                                                                                        | C22 H40 O             | 12.802 |
| (Z)-docos-13-enamide                                                                                                                                    | C22 H43 N O           | 12.806 |
| Unknown                                                                                                                                                 | C30 H67 N6 O P        | 12.841 |
| Unknown                                                                                                                                                 | C34 H68 N2 O2         | 12.847 |
| Unknown                                                                                                                                                 | C39 H58 F2 O3         | 12.847 |
| NP-008563                                                                                                                                               | C18 H32 O3            | 12.892 |
| Unknown                                                                                                                                                 | C36 H59 F3 O3         | 12.897 |
| Unknown                                                                                                                                                 | C43 H35 Cl F2 N O2 P  | 12.902 |
| Unknown                                                                                                                                                 | C41 H70 F2 N7 P       | 12.932 |
| Unknown                                                                                                                                                 | C23 H49 N             | 12.974 |
| N,N-Dimethyloctadecanamide                                                                                                                              | C20 H41 N O           | 13.102 |
| Unknown                                                                                                                                                 | C25 H53 N             | 13.104 |
| NP-014287                                                                                                                                               | C18 H32 O3            | 13.173 |
| Lanosta-8,24-dien-3beta,23-diol                                                                                                                         | C29 H48 O2            | 13.18  |
| Unknown                                                                                                                                                 | C32 H60 O5            | 13.243 |
| Unknown                                                                                                                                                 | C30 H55 F N4 O        | 13.244 |
| OPEO                                                                                                                                                    | C16 H26 O2            | 13.244 |
| Unknown                                                                                                                                                 | C30 H58 F N5 O2       | 13.312 |
| Unknown                                                                                                                                                 | C33 H54 N4 O          | 13.312 |
| Unknown                                                                                                                                                 | C31 H56 F N O S       | 13.316 |
| (10E,12E)-9-oxooctadeca-10,12-dienoic acid                                                                                                              | C18 H30 O3            | 13.353 |
| Unknown                                                                                                                                                 | C53 H33 Cl F3 N       | 13.424 |
| (9Z,11E,13S)-13-hydroperoxyoctadeca-9,11-dienoic acid                                                                                                   | C18 H32 O4            | 13.45  |
| (9Z)-Hexadec-9-enoic acid                                                                                                                               | C16 H30 O2            | 13.456 |
| 2-cyclohexylidenecyclohexan-1-one                                                                                                                       | C12 H18 O             | 13.457 |
| Unknown                                                                                                                                                 | C30 H57 N O5          | 13.473 |
| (4aS,5S,6S,8aS)-2-(6,10-Dimethyl-2-undecanyl)-5,8a-dimethyldecahydro-6-isoquinolinol                                                                    | C24 H47 N O           | 13.483 |
| Unknown                                                                                                                                                 | C30 H59 F3 O2         | 13.488 |
| Unknown                                                                                                                                                 | C27 H59 N8 P          | 13.489 |
| Unknown                                                                                                                                                 | C32 H46 F2            | 13.495 |

|                                                                                                                                                           |                        |        |
|-----------------------------------------------------------------------------------------------------------------------------------------------------------|------------------------|--------|
| Docosanamide                                                                                                                                              | C22 H45 N O            | 13.498 |
| Unknown                                                                                                                                                   | C32 H60 O5             | 13.538 |
| Unknown                                                                                                                                                   | C32 H63 N O5           | 13.539 |
| (2S,3R,4E,8E)-1-( $\beta$ -D-glucopyranosyl)-3-hydroxy-2-[(R)-2'-hydroxyhexadecanoyl]amino-9-methyl-4,8-heptadecadiene                                    | C40 H75 N O9           | 13.578 |
| Beyer-15-en-19-yl stearate                                                                                                                                | C38 H66 O2             | 13.661 |
| (5S)-4-(Cyclohexylmethyl)-1-{4-[(2S)-1-(cyclohexylmethyl)-5,6-dioxo-2-piperazinyl]butyl}-5-isobutyl-2,3-piperazinedione                                   | C30 H50 N4 O4          | 13.793 |
| 10-Oxo-10-[(3-oxoolean-12-en-28-yl)oxy]decanoic acid                                                                                                      | C40 H64 O5             | 13.793 |
| Unknown                                                                                                                                                   | C30 H58 O5 S           | 13.793 |
| N-[(2S)-1-[3-(Adamantan-1-yl)-2,4-dioxo-1-imidazolidinyl]-6-amino-2-hexanyl]dodecanamide                                                                  | C31 H54 N4 O3          | 13.793 |
| Unknown                                                                                                                                                   | C5 H2 F O2 P           | 13.888 |
| 1-(9Z-hexadecenoyl)-2-(9Z,12Z-octadecadienoyl)-sn-glycerol                                                                                                | C37 H66 O5             | 13.942 |
| N-Dodecyl-N-[2-([(11beta,16alpha,17alpha)-9-fluoro-11,17-dihydroxy-16-methyl-3-oxoandrosta-1,4-dien-17-yl]carbonyl]amino)ethyl]-N-methyl-1-dodecanaminium | C48 H84 F N2 O4        | 13.951 |
| Unknown                                                                                                                                                   | C5 H F2 O P            | 13.956 |
| Unknown                                                                                                                                                   | C23 H30 Cl N7 O2 S2    | 13.965 |
| Unknown                                                                                                                                                   | C21 H26 Cl N9 O2 S2    | 13.966 |
| Unknown                                                                                                                                                   | C21 H31 N2 O2 P S4     | 13.966 |
| Unknown                                                                                                                                                   | C21 H35 Cl F N7 S3     | 13.966 |
| N-(1,3-benzodioxol-5-yl)-7-chloroquinolin-4-amine                                                                                                         | C16 H11 Cl N2 O2       | 13.966 |
| Unknown                                                                                                                                                   | C16 H33 Cl F4 N4 O3 S3 | 13.967 |
| Unknown                                                                                                                                                   | C6 H12 F3 N2 O5 P      | 13.967 |

**(c) ethanol extract.**

| Compound Name                                                                             | Formula           | RT [min] |
|-------------------------------------------------------------------------------------------|-------------------|----------|
| 1-Methylpyrrolidin-2-one                                                                  | C5 H9 N O         | 0.517    |
| Lanosta-8,24-dien-3beta,23-diol                                                           | C29 H48 O2        | 0.528    |
| N,N-Dimethyldodecan-1-amine N-oxide                                                       | C25 H53 N         | 0.531    |
| 2-Hydroxy-N,N,N-trimethylethan-1-aminium                                                  | C5 H13 N O        | 0.584    |
| 2-Hydroxy-N,N,N-trimethylethan-1-aminium                                                  | C5 H13 N O        | 0.585    |
| 1,6-Dimethyl-1,6-Dinitroso-Biurea                                                         | C4 H8 N6 O4       | 0.595    |
| 1-Methylpyridin-1-ium-3-carboxylate                                                       | C7 H7 N O2        | 0.608    |
| 1,1-dimethylpyrrolidin-1-ium-2-carboxylic acid                                            | C7 H13 N O2       | 0.624    |
| 2,2,6,6-Tetramethyl-1,4-piperidinediol                                                    | C9 H19 N O2       | 0.627    |
| 2-Methylpropanamine                                                                       | C4 H11 N          | 0.627    |
| 4-Hydroxyquinoline-2-carboxylic acid                                                      | C10 H7 N O3       | 0.627    |
| 2-(methylamino)-1-phenylbutan-1-one                                                       | C11 H15 N O       | 0.628    |
| (2R)-4-methyl-2-([(2S)-1-phenylmethoxycarbonylpyrrolidine-2-carbonyl]amino]pentanoic acid | C11 H20 N2 O3     | 0.628    |
| 2,3-dihydroxybutanedihydrazide                                                            | C11 H15 N O2      | 0.629    |
| 2-Hydroxy-2-methylpropanenitrile                                                          | C4 H7 N O         | 0.63     |
| 9H-Purin-6-amine                                                                          | C5 H5 N5          | 0.63     |
| 2-Hydroxy-2-methylpropanenitrile                                                          | C4 H7 N O         | 0.893    |
| 2,6-di-tert-butyl-4-ethylphenol                                                           | C4 H10 N4 O4      | 2.912    |
| 4-Hydroxyquinoline-2-carboxylic acid                                                      | C10 H7 N O3       | 3.196    |
| Unknown                                                                                   | C13 H29 F O P2    | 3.627    |
| 3,6,9,12,15,18-Hexaoxaicosane-1,20-diol                                                   | C14 H30 O8        | 3.863    |
| Unknown                                                                                   | C19 H35 F N3 O2 P | 4.068    |
| Unknown                                                                                   | C23 H45 N5 O8     | 4.549    |
| Unknown                                                                                   | C25 H49 N5 O9     | 4.678    |

|                                                                                                                                                                          |                  |       |
|--------------------------------------------------------------------------------------------------------------------------------------------------------------------------|------------------|-------|
| (2R,3S,4S,5S,6R)-2-((7-hydroxy-4-[(3Z)-5-hydroxy-3-methylpent-3-en-1-yl]-4a,8,8-trimethyl-3-methylidene-decahydronaphthalen-2-yl)oxy)-6-(hydroxymethyl)oxane-3,4,5-triol | C26 H44 O8       | 4.824 |
| (2R,3S,4S,5S,6R)-2-((7-hydroxy-4-[(3Z)-5-hydroxy-3-methylpent-3-en-1-yl]-4a,8,8-trimethyl-3-methylidene-decahydronaphthalen-2-yl)oxy)-6-(hydroxymethyl)oxane-3,4,5-triol | C26 H44 O8       | 4.898 |
| Unknown                                                                                                                                                                  | C26 H58 F N5 O12 | 4.901 |
| (9E,12Z)-10-nitrooctadeca-9,12-dienoic acid                                                                                                                              | C18 H31 N O4     | 6.281 |
| NP-018660                                                                                                                                                                | C13 H22 O3       | 6.41  |
| (11E,15Z)-9,10,13-trihydroxyoctadeca-11,15-dienoic acid                                                                                                                  | C18 H32 O5       | 6.521 |
| NP-017152                                                                                                                                                                | C13 H23 N O2     | 6.66  |
| 3-(1'-Hydroxypentyl)phenol                                                                                                                                               | C11 H16 O2       | 6.773 |
| chromen-2-one                                                                                                                                                            | C9 H6 O2         | 6.806 |
| (9Z,11E,13S)-13-hydroperoxyoctadeca-9,11-dienoic acid                                                                                                                    | C18 H32 O4       | 6.841 |
| (9Z)-Hexadec-9-enoic acid                                                                                                                                                | C16 H30 O2       | 6.841 |
| 3-Methyl-1-phenyl-1,2-nonadiene                                                                                                                                          | C16 H22          | 6.875 |
| 1-phenyldecan-1-one                                                                                                                                                      | C16 H24 O        | 6.875 |
| 2-Aminohexadecanoic acid                                                                                                                                                 | C19 H24 N4       | 6.876 |
| OPEO                                                                                                                                                                     | C16 H26 O2       | 6.876 |
| (4Z,6E,8R,10Z)-8-hydroxyhexadeca-4,6,10-trienoic acid                                                                                                                    | C16 H26 O3       | 6.887 |
| NP-020214                                                                                                                                                                | C16 H32 O4       | 6.985 |
| 2-[(3S)-1-(Cyclohexylmethyl)-3-pyrrolidinyl]-1H-benzimidazole-5-carbonitrile                                                                                             | C16 H26 O        | 6.986 |
| 6-cyclohexyl-5-(cyclohexylimino)-4-thia-6-azaspiro[2.4]heptan-7-one                                                                                                      | C17 H26 N2 O S   | 7.011 |
| NP-008563                                                                                                                                                                | C16 H28 O4       | 7.017 |
| (4Z,6E,8R,10Z)-8-hydroxyhexadeca-4,6,10-trienoic acid                                                                                                                    | C16 H26 O3       | 7.018 |
| 1-[(2-Hydroxyethyl)amino]-2-dodecanol                                                                                                                                    | C14 H31 N O2     | 7.021 |
| N,N-Dimethyldodecan-1-amine N-oxide                                                                                                                                      | C12 H27 N O      | 7.055 |
| (2S,3S,4R)-2-aminotetradecane-1,3,4-triol                                                                                                                                | C14 H31 N O3     | 7.16  |
| OPEO                                                                                                                                                                     | C16 H26 O2       | 7.19  |
| 2-(dimethylamino)ethyl 3-cyclohexylpropanoate                                                                                                                            | C13 H25 N O2     | 7.236 |
| exo-1,7,7-Trimethylbicyclo(2.2.1)hept-2-yl acrylate                                                                                                                      | C13 H20 O2       | 7.381 |
| (2Z,4S,5S,6S,7R,8Z)-2,9-Diphenyldeca-2,8-diene-3,4,5,6,7,8-hexol                                                                                                         | C22 H26 O6       | 7.809 |
| (4Z,6E,8S,10Z)-8-hydroxyhexadeca-4,6,10-trienoic acid                                                                                                                    | C16 H26 O3       | 7.817 |
| Apigenin 7- (3",6"-di-p-coumarylglucoside)                                                                                                                               | C39 H32 O14      | 7.967 |
| 6-O-[(2E)-3-(4-Hydroxyphenyl)-2-propenoyl]-1-O-[(2E)-3-phenyl-2-propenoyl]-β-D-glucopyranose                                                                             | C24 H24 O9       | 7.968 |
| chromen-2-one                                                                                                                                                            | C9 H6 O2         | 7.969 |
| chromen-2-one                                                                                                                                                            | C9 H6 O2         | 8.017 |
| 6-O-[(2E)-3-(4-Hydroxyphenyl)-2-propenoyl]-1-O-[(2E)-3-phenyl-2-propenoyl]-β-D-glucopyranose                                                                             | C24 H24 O9       | 8.018 |
| chromen-2-one                                                                                                                                                            | C9 H6 O2         | 8.068 |
| 6-O-[(2E)-3-(4-Hydroxyphenyl)-2-propenoyl]-1-O-[(2E)-3-phenyl-2-propenoyl]-β-D-glucopyranose                                                                             | C24 H24 O9       | 8.133 |
| chromen-2-one                                                                                                                                                            | C9 H6 O2         | 8.133 |
| Hexadecanoic acid                                                                                                                                                        | C16 H32 O2       | 8.21  |
| N,N-Dimethyldodecan-1-amine N-oxide                                                                                                                                      | C14 H31 N O      | 8.254 |
| (2S,3S,4R)-2-Aminooctadecane-1,3,4-triol                                                                                                                                 | C18 H39 N O3     | 8.273 |
| Hexadecanoic acid                                                                                                                                                        | C16 H32 O2       | 8.315 |
| N,N-bis(2-hydroxyethyl)dodecan-1-amine oxide                                                                                                                             | C16 H35 N O3     | 8.317 |
| 1-Methylamino-1-(3,4-Methylenedioxyphenyl)Propane                                                                                                                        | C16 H33 N O2     | 8.439 |
| Unknown                                                                                                                                                                  | C32 H45 F O2 P2  | 8.478 |
| 1-[2,6-Bis(4-ethylphenyl)-4,4a,8,8a-tetrahydro-[1,3]dioxino[5,4-d][1,3]dioxin-4-yl]ethane-1,2-diol                                                                       | C24 H30 O6       | 8.513 |

|                                                                                                                                                                                                                                                |                     |        |
|------------------------------------------------------------------------------------------------------------------------------------------------------------------------------------------------------------------------------------------------|---------------------|--------|
| Hexadecanamide                                                                                                                                                                                                                                 | C16 H33 N O         | 8.584  |
| N,N-Dimethyldodecan-1-amine N-oxide                                                                                                                                                                                                            | C14 H31 N O         | 8.771  |
| Unknown                                                                                                                                                                                                                                        | C36 H76 F2 N3 O7 P  | 8.835  |
| N-(3-Methylbutanoyl)-D-valyl-N-[(3S)-1-[(2R)-1-[(2R)-1,2-dihydroxy-5-methyl-3-hexanyl]amino]-1-oxo-2-propanyl]amino}-3-hydroxy-6-methyl-1-oxo-4-heptanyl]-D-valinamide                                                                         | C33 H63 N5 O8       | 9.077  |
| (9Z)-Hexadec-9-enoic acid                                                                                                                                                                                                                      | C16 H30 O2          | 9.142  |
| (9Z)-Hexadec-9-enoic acid                                                                                                                                                                                                                      | C16 H30 O2          | 9.214  |
| Unknown                                                                                                                                                                                                                                        | C39 H74 F3 N9 O4    | 9.242  |
| (2S,3R)-2-aminooctadecane-1,3-diol                                                                                                                                                                                                             | C18 H39 N O2        | 9.356  |
| NP-004713                                                                                                                                                                                                                                      | C15 H24 O2          | 9.37   |
| Unknown                                                                                                                                                                                                                                        | C32 H58 O7          | 9.625  |
| (9Z,11E,13E)-Octadeca-9,11,13-trienoic acid                                                                                                                                                                                                    | C18 H30 O2          | 9.66   |
| Unknown                                                                                                                                                                                                                                        | C32 H58 O7          | 9.698  |
| (9Z,11E,13E)-Octadeca-9,11,13-trienoic acid                                                                                                                                                                                                    | C18 H30 O2          | 9.719  |
| 2-cyclohexylidenecyclohexan-1-one                                                                                                                                                                                                              | C12 H18 O           | 9.879  |
| N-[(2R,4S,5R)-5-Vinyl-1-azabicyclo[2.2.2]oct-2-yl)methyl]cyclohexanecarboxamide                                                                                                                                                                | C17 H28 N2 O        | 9.879  |
| (9Z)-Hexadec-9-enoic acid                                                                                                                                                                                                                      | C16 H30 O2          | 9.879  |
| (3bS,5aS,7R,8R,10aR,10bS)-7-(Hydroxymethyl)-10b-methyl-3b,4,5,6,7,8,9,10,10a,10b,11,12-dodecahydro-5a,8-methanocyclohepta[5,6]naphtho[2,1-b]furan-7-ol                                                                                         | C20 H28 O3          | 9.88   |
| (9Z,11E,13S)-13-hydroperoxyoctadeca-9,11-dienoic acid                                                                                                                                                                                          | C18 H32 O4          | 9.951  |
| (9Z)-Hexadec-9-enoic acid                                                                                                                                                                                                                      | C16 H30 O2          | 9.951  |
| 3-Hydroxy-2,2-bis[(nonanoyloxy)methyl]propyl nonanoate                                                                                                                                                                                         | C32 H60 O7          | 9.985  |
| N-[(2R,4S,5R)-5-Vinyl-1-azabicyclo[2.2.2]oct-2-yl)methyl]cyclohexanecarboxamide                                                                                                                                                                | C17 H28 N2 O        | 10.036 |
| (3bS,5aS,7R,8R,10aR,10bS)-7-(Hydroxymethyl)-10b-methyl-3b,4,5,6,7,8,9,10,10a,10b,11,12-dodecahydro-5a,8-methanocyclohepta[5,6]naphtho[2,1-b]furan-7-ol                                                                                         | C20 H28 O3          | 10.039 |
| (9Z)-Hexadec-9-enoic acid                                                                                                                                                                                                                      | C16 H30 O2          | 10.039 |
| (10E,12E)-9-oxooctadeca-10,12-dienoic acid                                                                                                                                                                                                     | C18 H30 O3          | 10.18  |
| N-[(2R,4S,5R)-5-Vinyl-1-azabicyclo[2.2.2]oct-2-yl)methyl]cyclohexanecarboxamide                                                                                                                                                                | C17 H28 N2 O        | 10.18  |
| (9Z)-Hexadec-9-enoic acid                                                                                                                                                                                                                      | C16 H30 O2          | 10.18  |
| (4E)-1-(4-Hydroxy-3-methoxyphenyl)dec-4-en-3-one                                                                                                                                                                                               | C17 H24 O3          | 10.23  |
| (9Z,12Z)-N-(2-hydroxyethyl)octadeca-9,12-dienamide                                                                                                                                                                                             | C20 H37 N O2        | 10.763 |
| 1-(3-cyano-3,3-diphenylpropyl)-4-phenylpiperidine-4-carboxylic acid                                                                                                                                                                            | C28 H28 N2 O2       | 10.877 |
| 3-[(3R,12Z,21S,22S)-16-ethenyl-11-ethyl-12-(hydroxymethylidene)-3-methoxycarbonyl-17,21,26-trimethyl-4-oxo-7,23,24,25-tetrazaheacyclo[18.2.1.15,8.110,13.115,18.02,6]hexacos-1,5(26),6,8,10,13(25),14,16,18(24),19-decaen-22-yl]propanoic acid | C35 H34 N4 O6       | 11.168 |
| 3,5-dichloro-2'-O-methylnorstenosporic acid                                                                                                                                                                                                    | C23 H26 Cl2 O7      | 11.295 |
| Unknown                                                                                                                                                                                                                                        | C13 H12 Cl2 N8 O4   | 11.399 |
| cis-N-Butyl-4-(4-octylphenyl)cyclohexanamine                                                                                                                                                                                                   | C24 H41 N           | 11.42  |
| 3-(4-tert-Butylphenyl)-1-(4-methoxyphenyl)propane-1,3-dione                                                                                                                                                                                    | C20 H22 O3          | 11.516 |
| (9Z)-N-(2-Hydroxyethyl)octadec-9-enamide                                                                                                                                                                                                       | C20 H39 N O2        | 11.523 |
| cis-N-Butyl-4-(4-octylphenyl)cyclohexanamine                                                                                                                                                                                                   | C24 H41 N           | 11.625 |
| Unknown                                                                                                                                                                                                                                        | C26 H36 F2 N8 O3 P2 | 11.861 |
| methyl (1R,15S,17R,18R,19S,20S)-6,18-dimethoxy-17-(3,4,5-trimethoxybenzoyl)oxy-1,3,11,12,14,15,16,17,18,19,20,21-dodecahydroyohimban-19-carboxylate                                                                                            | C33 H40 N2 O9       | 11.862 |
| 5-hydroxy-3-methyl-N-[3-[(2R,5R)-5-[3-[(2E)-3-methyl-5-[(2S,3R,4R,5S,6S)-3,4,5-trihydroxy-6-(hydroxymethyl)oxan-2-yl]oxy}pent-2-enamido]propyl]-3,6-dioxopiperazin-2-yl]propyl]pent-2-enamide                                                  | C28 H46 N4 O11      | 11.911 |

|                                                                                                                                                        |                      |        |
|--------------------------------------------------------------------------------------------------------------------------------------------------------|----------------------|--------|
| Unknown                                                                                                                                                | C28 H52 F6 N3 O P3   | 11.912 |
| methyl (1R,15S,17R,18R,19S,20S)-6,18-dimethoxy-17-(3,4,5-trimethoxybenzoyl)oxy-1,3,11,12,14,15,16,17,18,19,20,21-dodecahydroyohimban-19-carboxylate    | C33 H40 N2 O9        | 12.152 |
| Unknown                                                                                                                                                | C32 H35 F2 N4 O4 P   | 12.153 |
| Decamethylcyclopentasiloxane                                                                                                                           | C10 H30 O5 Si5       | 12.275 |
| N-[(2R)-2,3-Dihydroxypropyl]-5-fluoro-2-[(2-{[4-(4-isopropyl-1-piperazinyl)-2-methoxyphenyl]amino}-1H-pyrrolo[2,3-d]pyrimidin-4-yl)amino]benzamide     | C30 H37 F N8 O4      | 12.362 |
| Unknown                                                                                                                                                | C38 H35 F3 N2 O      | 12.363 |
| Methyl 3-({3-[4-(methoxycarbonyl)-4-phenyl-1-piperidinyl]propyl}carbamoyl)-6-methyl-4-(4-nitrophenyl)-2-oxo-1,2,3,4-tetrahydro-5-pyrimidinecarboxylate | C30 H35 N5 O8        | 12.363 |
| 3-[(3S,4S,21R)-14-Ethyl-21-(methoxycarbonyl)-4,8,13,18-tetramethyl-20-oxo-9-vinyl-3-phorbiny]propanoic acid                                            | C35 H36 N4 O5        | 12.55  |
| Unknown                                                                                                                                                | C20 H46 F2 N10 O2 S3 | 12.55  |
| 1'-ethyl-5-[2'-methyl-4'-(5-methyl-1,3,4-oxadiazolyl-2-yl)biphenyl-4-carbonyl]-2,3,6,7-tetrahydrospiro(furo[2,3-f]indole-3,4'-piperidine)              | C33 H34 N4 O3        | 12.706 |
| (1R,9S)-5-[(E)-2-(4-Chlorophenyl)vinyl]-11-(5-pyrimidinylcarbonyl)-7,11-diazatricyclo[7.3.1.02,7]trideca-2,4-dien-6-one                                | C24 H21 Cl N4 O2     | 12.949 |
| 1-isothiocyanatooctane                                                                                                                                 | C9 H17 N S           | 12.949 |
| N-[(2S,3R)-1,3-dihydroxyoctadecan-2-yl]dodecanamide                                                                                                    | C30 H61 N O3         | 13.035 |
| Decamethylcyclopentasiloxane                                                                                                                           | C10 H30 O5 Si5       | 13.092 |
| Unknown                                                                                                                                                | C27 H47 Cl N O3 P S4 | 13.093 |
| Unknown                                                                                                                                                | C37 H28 Cl N5 S      | 13.469 |
| (Z)-docos-13-enamide                                                                                                                                   | C22 H43 N O          | 13.637 |
| Unknown                                                                                                                                                | C28 H48 Cl N3 O7 S4  | 13.758 |
| Unknown                                                                                                                                                | C39 H80 F3 N O P2 S  | 13.781 |

**(d) ethyl acetate extract.**

| Compound Name                                                | Formula            | RT [min] |
|--------------------------------------------------------------|--------------------|----------|
| Unknown                                                      | C26 H49 F O        | 0.511    |
| 4,6-dimethylpyrimidin-2-amine                                | C6 H9 N3           | 0.525    |
| N,N-Dimethyldodecan-1-amine N-oxide                          | C25 H53 N          | 0.529    |
| Unknown                                                      | C6 H11 F3 O4       | 0.594    |
| Unknown                                                      | C9 H17 F3 N4       | 0.626    |
| 11-Aminoundecanoic acid                                      | C11 H23 N O2       | 0.627    |
| 1-Methylamino-1-(3,4-Methylenedioxyphenyl)Propane            | C11 H15 N O2       | 0.627    |
| 2-Amino-6-(((2-chlorobenzyl)oxy)carbonyl)amino)hexanoic acid | C14 H19 Cl N2 O4   | 0.627    |
| Unknown                                                      | C12 H25 F2 N2 O P  | 0.627    |
| 2-Hydroxy-2-methylpropanenitrile                             | C4 H7 N O          | 0.628    |
| pyridine-3-carboxamide                                       | C6 H6 N2 O         | 0.628    |
| 2-Ethyl-2-oxazoline                                          | C5 H9 N O          | 0.634    |
| 2-Hydroxy-2-methylpropanenitrile                             | C4 H7 N O          | 0.788    |
| 2-Hydroxy-2-methylpropanenitrile                             | C4 H7 N O          | 0.887    |
| 3,6,9,12,15-Pentaoxaheptadecan-1,17-diol                     | C12 H26 O7         | 3.631    |
| 3,6,9,12,15,18-Hexaoxaicosane-1,20-diol                      | C14 H30 O8         | 3.867    |
| Unknown                                                      | C17 H33 N5 O5      | 4.072    |
| Unknown                                                      | C22 H48 F2 N3 O6 P | 4.551    |
| Unknown                                                      | C25 H49 N5 O9      | 4.68     |
| NP-018660                                                    | C13 H22 O3         | 6.41     |
| 3-(1'-Hydroxypentyl)phenol                                   | C11 H16 O2         | 6.774    |
| chromen-2-one                                                | C9 H6 O2           | 6.806    |
| (12Z)-9,10,11-trihydroxyoctadec-12-enoic acid                | C18 H34 O5         | 6.831    |
| Unknown                                                      | C16 H24 F4 O2      | 6.874    |

|                                                                                                                                                                                                        |                |       |
|--------------------------------------------------------------------------------------------------------------------------------------------------------------------------------------------------------|----------------|-------|
| 1-phenyldecan-1-one                                                                                                                                                                                    | C16 H24 O      | 6.874 |
| 1-Ethynyl-4-octylbenzene                                                                                                                                                                               | C16 H22        | 6.875 |
| OPEO                                                                                                                                                                                                   | C16 H26 O2     | 6.875 |
| 6-cyclohexyl-5-(cyclohexylimino)-4-thia-6-azaspiro[2.4]heptan-7-one                                                                                                                                    | C17 H26 N2 O S | 7.012 |
| NP-008563                                                                                                                                                                                              | C16 H28 O4     | 7.017 |
| 1-[(2-Hydroxyethyl)amino]-2-dodecanol                                                                                                                                                                  | C14 H31 N O2   | 7.021 |
| N,N-Dimethyldodecan-1-amine N-oxide                                                                                                                                                                    | C12 H27 N O    | 7.055 |
| 2,2,6,6-Tetramethyl-4-piperidinol                                                                                                                                                                      | C9 H19 N O     | 7.07  |
| (2S,3S,4R)-2-aminotetradecane-1,3,4-triol                                                                                                                                                              | C14 H31 N O3   | 7.162 |
| OPEO                                                                                                                                                                                                   | C16 H26 O2     | 7.19  |
| 2-(dimethylamino)ethyl 3-cyclohexylpropanoate                                                                                                                                                          | C13 H25 N O2   | 7.24  |
| exo-1,7,7-Trimethylbicyclo(2.2.1)hept-2-yl acrylate                                                                                                                                                    | C13 H20 O2     | 7.381 |
| 4-oxododecanedioic acid                                                                                                                                                                                | C12 H20 O5     | 7.809 |
| (2Z,4S,5S,6S,7R,8Z)-2,9-Diphenyldeca-2,8-diene-3,4,5,6,7,8-hexol                                                                                                                                       | C22 H26 O6     | 7.809 |
| Ethenylbenzene                                                                                                                                                                                         | C8 H8          | 7.809 |
| 3-(4-hydroxy-3-methoxyphenyl)-N-{4-[3-(4-hydroxy-3-methoxyphenyl)propanamido]butyl}propanamide                                                                                                         | C24 H32 N2 O6  | 7.81  |
| 6-O-[(2E)-3-(4-Hydroxyphenyl)-2-propenoyl]-1-O-[(2E)-3-phenyl-2-propenoyl]-β-D-glucopyranose                                                                                                           | C24 H24 O9     | 7.967 |
| chromen-2-one                                                                                                                                                                                          | C9 H6 O2       | 7.967 |
| 6-O-[(2E)-3-(4-Hydroxyphenyl)-2-propenoyl]-1-O-[(2E)-3-phenyl-2-propenoyl]-β-D-glucopyranose                                                                                                           | C24 H24 O9     | 8.015 |
| (11E,15Z)-9,10,13-trihydroxyoctadeca-11,15-dienoic acid                                                                                                                                                | C18 H32 O5     | 8.018 |
| chromen-2-one                                                                                                                                                                                          | C9 H6 O2       | 8.018 |
| chromen-2-one                                                                                                                                                                                          | C9 H6 O2       | 8.067 |
| 6-O-[(2E)-3-(4-Hydroxyphenyl)-2-propenoyl]-1-O-[(2E)-3-phenyl-2-propenoyl]-β-D-glucopyranose                                                                                                           | C24 H24 O9     | 8.133 |
| chromen-2-one                                                                                                                                                                                          | C9 H6 O2       | 8.135 |
| Hexadecanoic acid                                                                                                                                                                                      | C16 H32 O2     | 8.208 |
| N,N-Dimethyldodecan-1-amine N-oxide                                                                                                                                                                    | C14 H31 N O    | 8.256 |
| (2S,3S,4R)-2-Aminooctadecane-1,3,4-triol                                                                                                                                                               | C18 H39 N O3   | 8.275 |
| N,N-bis(2-hydroxyethyl)dodecan-1-amine oxide                                                                                                                                                           | C16 H35 N O3   | 8.317 |
| 2-aminohexadecanoic acid                                                                                                                                                                               | C16 H33 N O2   | 8.442 |
| Ethyl hydrogen [(1s,4s)-dispiro[cyclohexane-1,3'-[1,2,4]trioxolane-5',2''-tricyclo[3.3.1.1~3,7~]decan]-4-ylmethyl]phosphonate                                                                          | C19 H31 O6 P   | 8.465 |
| methyl (4aS,4bR,5aR,6aS,7R,9aS,9bR,10R)-4a,6a-dimethyl-2,5'-dioxo-2,4,4',4a,5',5a,6,6a,8,9,9a,9b,10,11-tetradecahydro-3H,3'H-spiro[cyclopenta[7,8]phenanthro[4b,5-b]oxirene-7,2'-furan]-10-carboxylate | C24 H30 O6     | 8.512 |
| Hexadecanamide                                                                                                                                                                                         | C16 H33 N O    | 8.584 |
| N,N-Dimethyldodecan-1-amine N-oxide                                                                                                                                                                    | C14 H31 N O    | 8.774 |
| (9Z)-Hexadec-9-enoic acid                                                                                                                                                                              | C16 H30 O2     | 9.143 |
| (9Z)-Hexadec-9-enoic acid                                                                                                                                                                              | C16 H30 O2     | 9.214 |
| (2S,3R)-2-aminooctadecane-1,3-diol                                                                                                                                                                     | C18 H39 N O2   | 9.359 |
| NP-004713                                                                                                                                                                                              | C15 H24 O2     | 9.37  |
| Unknown                                                                                                                                                                                                | C32 H58 O7     | 9.625 |
| (9Z,12Z,15Z)-Octadeca-9,12,15-trienoic acid                                                                                                                                                            | C18 H30 O2     | 9.66  |
| Unknown                                                                                                                                                                                                | C33 H56 F2 O4  | 9.699 |
| NP-020521                                                                                                                                                                                              | C18 H32 O3     | 9.718 |
| 2-cyclohexylidenecyclohexan-1-one                                                                                                                                                                      | C12 H18 O      | 9.879 |
| (9Z)-Hexadec-9-enoic acid                                                                                                                                                                              | C16 H30 O2     | 9.879 |
| (9Z,11E,13S)-13-hydroperoxyoctadeca-9,11-dienoic acid                                                                                                                                                  | C18 H32 O4     | 9.88  |
| (3bS,5aS,7R,8R,10aR,10bS)-7-(Hydroxymethyl)-10b-methyl-3b,4,5,6,7,8,9,10,10a,10b,11,12-dodecahydro-5a,8-methanocyclohepta[5,6]naphtho[2,1-b]furan-7-ol                                                 | C20 H28 O3     | 9.88  |

|                                                                                                                                                                                                                                                   |                     |        |
|---------------------------------------------------------------------------------------------------------------------------------------------------------------------------------------------------------------------------------------------------|---------------------|--------|
| (9Z,11E,13S)-13-hydroperoxyoctadeca-9,11-dienoic acid                                                                                                                                                                                             | C18 H32 O4          | 9.951  |
| (9Z)-Hexadec-9-enoic acid                                                                                                                                                                                                                         | C16 H30 O2          | 9.951  |
| N-[[[(2R,4S,5R)-5-Vinyl-1-azabicyclo[2.2.2]oct-2-yl)methyl]cyclohexanecarboxamide                                                                                                                                                                 | C17 H28 N2 O        | 10.038 |
| (9Z)-Hexadec-9-enoic acid                                                                                                                                                                                                                         | C16 H30 O2          | 10.038 |
| (3bS,5aS,7R,8R,10aR,10bS)-7-(Hydroxymethyl)-10b-methyl-3b,4,5,6,7,8,9,10,10a,10b,11,12-dodecahydro-5a,8-methanocyclohepta[5,6]naphtho[2,1-b]furan-7-ol                                                                                            | C20 H28 O3          | 10.039 |
| N-[[[(2R,4S,5R)-5-Vinyl-1-azabicyclo[2.2.2]oct-2-yl)methyl]cyclohexanecarboxamide                                                                                                                                                                 | C17 H28 N2 O        | 10.177 |
| (10E,12E)-9-oxooctadeca-10,12-dienoic acid                                                                                                                                                                                                        | C18 H30 O3          | 10.179 |
| (9Z)-Hexadec-9-enoic acid                                                                                                                                                                                                                         | C16 H30 O2          | 10.18  |
| (9Z,12Z)-N-(2-hydroxyethyl)octadeca-9,12-dienamide                                                                                                                                                                                                | C20 H37 N O2        | 10.762 |
| Unknown                                                                                                                                                                                                                                           | C17 H32 N2 O10      | 10.878 |
| 3-[(3R,12Z,21S,22S)-16-ethenyl-11-ethyl-12-(hydroxymethylidene)-3-methoxycarbonyl-17,21,26-trimethyl-4-oxo-7,23,24,25-tetrazahexacyclo[18.2.1.15,8.110,13.115,18.02,6]hexacosal-1,5(26),6,8,10,13(25),14,16,18(24),19-decaen-22-yl]propanoic acid | C35 H34 N4 O6       | 11.168 |
| 3,5-dichloro-2'-O-methylnorstenosporic acid                                                                                                                                                                                                       | C23 H26 Cl2 O7      | 11.295 |
| Unknown                                                                                                                                                                                                                                           | C13 H12 Cl2 N8 O4   | 11.4   |
| (9Z)-N-(2-Hydroxyethyl)octadec-9-enamide                                                                                                                                                                                                          | C20 H39 N O2        | 11.523 |
| Unknown                                                                                                                                                                                                                                           | C24 H41 F2 N6 O4 P3 | 11.86  |
| methyl (1R,15S,17R,18R,19S,20S)-6,18-dimethoxy-17-(3,4,5-trimethoxybenzoyl)oxy-1,3,11,12,14,15,16,17,18,19,20,21-dodecahydroyohimban-19-carboxylate                                                                                               | C33 H40 N2 O9       | 11.861 |
| 5-hydroxy-3-methyl-N-{3-[(2R,5R)-5-{3-[(2E)-3-methyl-5-[(2S,3R,4R,5S,6S)-3,4,5-trihydroxy-6-(hydroxymethyl)oxan-2-yl]oxy}pent-2-enamido]propyl}-3,6-dioxopiperazin-2-yl]propyl}pent-2-enamide                                                     | C28 H46 N4 O11      | 11.91  |
| Unknown                                                                                                                                                                                                                                           | C32 H49 F N3 O8 P   | 11.911 |
| Unknown                                                                                                                                                                                                                                           | C36 H55 O11 P       | 11.911 |
| methyl (1R,15S,17R,18R,19S,20S)-6,18-dimethoxy-17-(3,4,5-trimethoxybenzoyl)oxy-1,3,11,12,14,15,16,17,18,19,20,21-dodecahydroyohimban-19-carboxylate                                                                                               | C33 H40 N2 O9       | 12.152 |
| Unknown                                                                                                                                                                                                                                           | C19 H41 F6 N6 O3 P3 | 12.154 |
| Decamethylcyclopentasiloxane                                                                                                                                                                                                                      | C10 H30 O5 Si5      | 12.275 |
| Unknown                                                                                                                                                                                                                                           | C21 H39 F6 N10 O P  | 12.363 |
| 2-(Allyl[4-[(2-ethyl-5,7-dimethyl-3H-imidazo[4,5-b]pyridin-3-yl)methyl]phenyl]amino)-2-phenyl-N-(phenylsulfonyl)acetamide                                                                                                                         | C34 H35 N5 O3 S     | 12.367 |
| 3-[(3S,4S,21R)-14-Ethyl-21-(methoxycarbonyl)-4,8,13,18-tetramethyl-20-oxo-9-vinyl-3-phorbiny]propanoic acid                                                                                                                                       | C35 H36 N4 O5       | 12.367 |
| Unknown                                                                                                                                                                                                                                           | C20 H44 N6 O14      | 12.549 |
| Unknown                                                                                                                                                                                                                                           | C35 H36 N4 O5       | 12.549 |
| 1'-ethyl-5-[2'-methyl-4'-(5-methyl-1,3,4-oxadiazolyl-2-yl)biphenyl-4-carbonyl]-2,3,6,7-tetrahydrospiro(furo[2,3-f]indole-3,4'-piperidine)                                                                                                         | C33 H34 N4 O3       | 12.704 |
| (1R,9S)-5-[(E)-2-(4-Chlorophenyl)vinyl]-11-(5-pyrimidinylcarbonyl)-7,11-diazatricyclo[7.3.1.02,7]trideca-2,4-dien-6-one                                                                                                                           | C24 H21 Cl N4 O2    | 12.948 |
| 1-isothiocyanatooctane                                                                                                                                                                                                                            | C9 H17 N S          | 12.948 |
| Decamethylcyclopentasiloxane                                                                                                                                                                                                                      | C10 H30 O5 Si5      | 13.092 |
| N-{4-[4-(4-Chlorophenyl)-1-piperazinyl]benzyl}-2-(dibenzo[b,d]thiophen-2-yl)imidazo[1,2-a]pyridine-3-carboxamide                                                                                                                                  | C37 H30 Cl N5 O S   | 13.092 |
| (Z)-docos-13-enamide                                                                                                                                                                                                                              | C22 H43 N O         | 13.639 |
| Unknown                                                                                                                                                                                                                                           | C42 H31 Cl F3 N3 O2 | 13.76  |

**(e) methanol extract.**

| Compound Name                                          | Formula    | RT [min] |
|--------------------------------------------------------|------------|----------|
| 5,6-epoxy-24(R)-methylcholesta-7,22-dien-3 $\beta$ -ol | C28 H46 O2 | 0.514    |

|                                                                                                                                                                          |                  |       |
|--------------------------------------------------------------------------------------------------------------------------------------------------------------------------|------------------|-------|
| Unknown                                                                                                                                                                  | C27 H51 N O3     | 0.521 |
| 2,6-di-tert-butyl-4-ethylphenol                                                                                                                                          | C9 H12 O         | 0.525 |
| 2-Amino-6-(((2-chlorobenzyl)oxy)carbonyl)amino)hexanoic acid                                                                                                             | C6 H9 N3         | 0.525 |
| Lanosta-8,24-dien-3beta,23-diol                                                                                                                                          | C29 H48 O2       | 0.526 |
| NP-021293                                                                                                                                                                | C30 H48 O4       | 0.526 |
| N,N-Dimethyldodecan-1-amine N-oxide                                                                                                                                      | C25 H53 N        | 0.529 |
| 2-Hydroxy-N,N,N-trimethylethan-1-aminium                                                                                                                                 | C5 H13 N O       | 0.583 |
| 2-Hydroxy-N,N,N-trimethylethan-1-aminium                                                                                                                                 | C5 H13 N O       | 0.591 |
| Unknown                                                                                                                                                                  | C4 H10 F2 N2 O5  | 0.594 |
| 1,6-Dimethyl-1,6-Dinitroso-Biurea                                                                                                                                        | C4 H8 N6 O4      | 0.596 |
| 1-Methylpyridin-1-ium-3-carboxylate                                                                                                                                      | C7 H7 N O2       | 0.607 |
| 1-Methylpyridin-1-ium-3-carboxylate                                                                                                                                      | C7 H7 N O2       | 0.607 |
| 1,1-dimethylpyrrolidin-1-ium-2-carboxylic acid                                                                                                                           | C7 H13 N O2      | 0.623 |
| 3-(1-hydroxyethyl)-2,3,6,7,8,8a-hexahydropyrrolo[1,2-a]pyrazine-1,4-dione                                                                                                | C9 H14 N2 O3     | 0.626 |
| 4-Hydroxyquinoline-2-carboxylic acid                                                                                                                                     | C10 H7 N O3      | 0.626 |
| (2R)-4-methyl-2-(((2S)-1-phenylmethoxycarbonylpyrrolidine-2-carbonyl)amino)pentanoic acid                                                                                | C11 H20 N2 O3    | 0.626 |
| 2,2,6,6-Tetramethyl-1,4-piperidinediol                                                                                                                                   | C9 H19 N O2      | 0.627 |
| 2-(Allyl{4-[(2-ethyl-5,7-dimethyl-3H-imidazo[4,5-b]pyridin-3-yl)methyl]phenyl}amino)-2-phenyl-N-(phenylsulfonyl)acetamide                                                | C11 H15 N O2     | 0.627 |
| 2-Ethyl-2-oxazoline                                                                                                                                                      | C5 H9 N O        | 0.627 |
| 2-Hydroxy-2-methylpropanenitrile                                                                                                                                         | C4 H7 N O        | 0.627 |
| 2-(methylamino)-1-phenylbutan-1-one                                                                                                                                      | C11 H15 N O      | 0.627 |
| N-(tert-Butyl)-N'-(2-hydroxyethyl)urea                                                                                                                                   | C7 H16 N2 O2     | 0.627 |
| 9H-Purin-6-amine                                                                                                                                                         | C5 H5 N5         | 0.628 |
| 2-Aminohexadecanoic acid                                                                                                                                                 | C14 H19 Cl N2 O4 | 0.633 |
| 2-Hydroxy-2-methylpropanenitrile                                                                                                                                         | C4 H7 N O        | 0.895 |
| 2,3-dihydroxybutanedihydrazide                                                                                                                                           | C4 H10 N4 O4     | 2.958 |
| 4-Hydroxyquinoline-2-carboxylic acid                                                                                                                                     | C10 H7 N O3      | 3.216 |
| 3,6,9,12,15,18-Hexaoxaicosane-1,20-diol                                                                                                                                  | C14 H30 O8       | 3.847 |
| Unknown                                                                                                                                                                  | C20 H39 N O2 P2  | 4.057 |
| Unknown                                                                                                                                                                  | C23 H45 N5 O8    | 4.542 |
| Unknown                                                                                                                                                                  | C25 H49 N5 O9    | 4.671 |
| (2R,3S,4S,5S,6R)-2-((7-hydroxy-4-[(3Z)-5-hydroxy-3-methylpent-3-en-1-yl]-4a,8,8-trimethyl-3-methylidene-decahydronaphthalen-2-yl)oxy)-6-(hydroxymethyl)oxane-3,4,5-triol | C26 H44 O8       | 4.801 |
| (2R,3S,4S,5S,6R)-2-((7-hydroxy-4-[(3Z)-5-hydroxy-3-methylpent-3-en-1-yl]-4a,8,8-trimethyl-3-methylidene-decahydronaphthalen-2-yl)oxy)-6-(hydroxymethyl)oxane-3,4,5-triol | C26 H44 O8       | 4.895 |
| (9E,12Z)-10-nitrooctadeca-9,12-dienoic acid                                                                                                                              | C18 H31 N O4     | 6.279 |
| NP-018660                                                                                                                                                                | C13 H22 O3       | 6.408 |
| N-Dodecyl-3,4,5-trihydroxybenzamide                                                                                                                                      | C19 H31 N O4     | 6.411 |
| 8-(4-oxo-5-pent-2-enylcyclopent-2-en-1-yl)octanoic acid                                                                                                                  | C18 H28 O3       | 6.518 |
| (11E,15Z)-9,10,13-trihydroxyoctadeca-11,15-dienoic acid                                                                                                                  | C18 H32 O5       | 6.519 |
| NP-017152                                                                                                                                                                | C13 H23 N O2     | 6.658 |
| 3-Butyl-3a,4,5,6-tetrahydro-2-benzofuran-1(3H)-one                                                                                                                       | C12 H18 O2       | 6.834 |
| Unknown                                                                                                                                                                  | C17 H36 F O P3   | 6.835 |
| (9Z)-Hexadec-9-enoic acid                                                                                                                                                | C16 H30 O2       | 6.838 |
| (9Z,11E,13S)-13-hydroperoxyoctadeca-9,11-dienoic acid                                                                                                                    | C18 H32 O4       | 6.839 |
| Hexadecanedioic acid                                                                                                                                                     | C16 H30 O4       | 6.859 |
| 1-phenyldecan-1-one                                                                                                                                                      | C16 H24 O        | 6.873 |
| (S)-1-[3-(Dimethylamino)propyl]-1-(4-fluorophenyl)-1,3-dihydroisobenzofuran-5-carbonitrile                                                                               | C20 H21 F N2 O   | 6.873 |
| OPEO                                                                                                                                                                     | C16 H26 O2       | 6.873 |

|                                                                                                                                                                                                        |                 |       |
|--------------------------------------------------------------------------------------------------------------------------------------------------------------------------------------------------------|-----------------|-------|
| Hexadecanedioic acid                                                                                                                                                                                   | C16 H30 O4      | 6.873 |
| 3-Methyl-1-phenyl-1,2-nonadiene                                                                                                                                                                        | C16 H22         | 6.874 |
| Hexadecanedioic acid                                                                                                                                                                                   | C16 H30 O4      | 6.897 |
| 2-Amino-4,6-dimethylpyrimidine                                                                                                                                                                         | C16 H26 O       | 6.985 |
| 6-cyclohexyl-5-(cyclohexylimino)-4-thia-6-azaspiro[2.4]heptan-7-one                                                                                                                                    | C17 H26 N2 O S  | 7.001 |
| NP-008563                                                                                                                                                                                              | C16 H28 O4      | 7.016 |
| (4Z,6E,8R,10Z)-8-hydroxyhexadeca-4,6,10-trienoic acid                                                                                                                                                  | C16 H26 O3      | 7.016 |
| 1-[(2-Hydroxyethyl)amino]-2-dodecanol                                                                                                                                                                  | C14 H31 N O2    | 7.022 |
| N,N-Dimethyldodecan-1-amine N-oxide                                                                                                                                                                    | C12 H27 N O     | 7.054 |
| 2,3,6-Trimethylphenol                                                                                                                                                                                  | C9 H19 N O      | 7.067 |
| (2S,3S,4R)-2-aminotetradecane-1,3,4-triol                                                                                                                                                              | C14 H31 N O3    | 7.161 |
| OPEO                                                                                                                                                                                                   | C16 H26 O2      | 7.189 |
| Hexadecanedioic acid                                                                                                                                                                                   | C16 H30 O4      | 7.189 |
| Hexadecanedioic acid                                                                                                                                                                                   | C16 H30 O4      | 7.189 |
| 2-(dimethylamino)ethyl 3-cyclohexylpropanoate                                                                                                                                                          | C13 H25 N O2    | 7.241 |
| exo-1,7,7-Trimethylbicyclo(2.2.1)hept-2-yl acrylate                                                                                                                                                    | C13 H20 O2      | 7.379 |
| (2Z,4S,5S,6S,7R,8Z)-2,9-Diphenyldeca-2,8-diene-3,4,5,6,7,8-hexol                                                                                                                                       | C22 H26 O6      | 7.808 |
| (4Z,6E,8S,10Z)-8-hydroxyhexadeca-4,6,10-trienoic acid                                                                                                                                                  | C16 H26 O3      | 7.816 |
| 6-O-[(2E)-3-(4-Hydroxyphenyl)-2-propenoyl]-1-O-[(2E)-3-phenyl-2-propenoyl]-β-D-glucopyranose                                                                                                           | C24 H24 O9      | 7.966 |
| chromen-2-one                                                                                                                                                                                          | C9 H6 O2        | 7.966 |
| chromen-2-one                                                                                                                                                                                          | C9 H6 O2        | 8.015 |
| 6-O-[(2E)-3-(4-Hydroxyphenyl)-2-propenoyl]-1-O-[(2E)-3-phenyl-2-propenoyl]-β-D-glucopyranose                                                                                                           | C24 H24 O9      | 8.131 |
| chromen-2-one                                                                                                                                                                                          | C9 H6 O2        | 8.131 |
| Hexadecanoic acid                                                                                                                                                                                      | C16 H32 O2      | 8.206 |
| N,N-Dimethyldodecan-1-amine N-oxide                                                                                                                                                                    | C14 H31 N O     | 8.252 |
| (2S,3S,4R)-2-Aminooctadecane-1,3,4-triol                                                                                                                                                               | C18 H39 N O3    | 8.273 |
| N,N-bis(2-hydroxyethyl)dodecan-1-amine oxide                                                                                                                                                           | C16 H35 N O3    | 8.315 |
| 1-Methylamino-1-(3,4-Methylenedioxyphenyl)Propane                                                                                                                                                      | C16 H33 N O2    | 8.437 |
| methyl (4aS,4bR,5aR,6aS,7R,9aS,9bR,10R)-4a,6a-dimethyl-2,5'-dioxo-2,4,4',4a,5',5a,6,6a,8,9,9a,9b,10,11-tetradecahydro-3H,3'H-spiro[cyclopenta[7,8]phenanthro[4b,5-b]oxirene-7,2'-furan]-10-carboxylate | C24 H30 O6      | 8.512 |
| Hexadecanamide                                                                                                                                                                                         | C16 H33 N O     | 8.582 |
| N,N-Dimethyldodecan-1-amine N-oxide                                                                                                                                                                    | C14 H31 N O     | 8.77  |
| (9Z)-Hexadec-9-enoic acid                                                                                                                                                                              | C16 H30 O2      | 9.142 |
| (9Z)-Hexadec-9-enoic acid                                                                                                                                                                              | C16 H30 O2      | 9.213 |
| (2S,3R)-2-aminooctadecane-1,3-diol                                                                                                                                                                     | C18 H39 N O2    | 9.358 |
| NP-004713                                                                                                                                                                                              | C15 H24 O2      | 9.368 |
| Unknown                                                                                                                                                                                                | C31 H53 F3 N4 O | 9.625 |
| (9Z,11E,13E)-Octadeca-9,11,13-trienoic acid                                                                                                                                                            | C18 H30 O2      | 9.659 |
| Unknown                                                                                                                                                                                                | C33 H56 F2 O4   | 9.697 |
| (9Z,12Z,15Z)-Octadeca-9,12,15-trienoic acid                                                                                                                                                            | C18 H30 O2      | 9.714 |
| N-[[[(2R,4S,5R)-5-Vinyl-1-azabicyclo[2.2.2]oct-2-yl)methyl]cyclohexanecarboxamide                                                                                                                      | C17 H28 N2 O    | 9.877 |
| 2-cyclohexylidenecyclohexan-1-one                                                                                                                                                                      | C12 H18 O       | 9.878 |
| (9Z)-Hexadec-9-enoic acid                                                                                                                                                                              | C16 H30 O2      | 9.878 |
| (3bS,5aS,7R,8R,10aR,10bS)-7-(Hydroxymethyl)-10b-methyl-3b,4,5,6,7,8,9,10,10a,10b,11,12-dodecahydro-5a,8-methanocyclohepta[5,6]naphtho[2,1-b]furan-7-ol                                                 | C20 H28 O3      | 9.879 |
| (9Z)-Hexadec-9-enoic acid                                                                                                                                                                              | C16 H30 O2      | 9.949 |
| (9Z,11E,13S)-13-hydroperoxyoctadeca-9,11-dienoic acid                                                                                                                                                  | C18 H32 O4      | 9.95  |

|                                                                                                                                                                                                                                                 |                      |        |
|-------------------------------------------------------------------------------------------------------------------------------------------------------------------------------------------------------------------------------------------------|----------------------|--------|
| (3bS,5aS,7R,8R,10aR,10bS)-7-(Hydroxymethyl)-10b-methyl-3b,4,5,6,7,8,9,10,10a,10b,11,12-dodecahydro-5a,8-methanocyclohepta[5,6]naphtho[2,1-b]furan-7-ol                                                                                          | C20 H28 O3           | 10.037 |
| N-[[[(2R,4S,5R)-5-Vinyl-1-azabicyclo[2.2.2]oct-2-yl)methyl]cyclohexanecarboxamide                                                                                                                                                               | C17 H28 N2 O         | 10.037 |
| (9Z)-Hexadec-9-enoic acid                                                                                                                                                                                                                       | C16 H30 O2           | 10.037 |
| N-[[[(2R,4S,5R)-5-Vinyl-1-azabicyclo[2.2.2]oct-2-yl)methyl]cyclohexanecarboxamide                                                                                                                                                               | C17 H28 N2 O         | 10.178 |
| (9Z)-Hexadec-9-enoic acid                                                                                                                                                                                                                       | C16 H30 O2           | 10.178 |
| (10E,12E)-9-oxooctadeca-10,12-dienoic acid                                                                                                                                                                                                      | C18 H30 O3           | 10.179 |
| (9Z,12Z)-N-(2-hydroxyethyl)octadeca-9,12-dienamide                                                                                                                                                                                              | C20 H37 N O2         | 10.761 |
| Unknown                                                                                                                                                                                                                                         | C20 H31 F3 O6        | 10.875 |
| 3-[(3R,12Z,21S,22S)-16-ethenyl-11-ethyl-12-(hydroxymethylidene)-3-methoxycarbonyl-17,21,26-trimethyl-4-oxo-7,23,24,25-tetrazahexacyclo[18.2.1.15,8.110,13.115,18.02,6]hexacos-1,5(26),6,8,10,13(25),14,16,18(24),19-decaen-22-yl]propanoic acid | C35 H34 N4 O6        | 11.167 |
| (4R,4'S)-2'-(3-Chlorophenyl)-5'-phenyl-4'-(2-thienyl)-2,2',3,4'-tetrahydro-5H-spiro[1-benzothiepine-4,3'-pyrazol]-5-one                                                                                                                         | C28 H21 Cl N2 O S2   | 11.293 |
| 2,2,4,4,6,6,8,8,10,10,12,12-dodecamethyl-1,3,5,7,9,11-hexaoxa-2,4,6,8,10,12-hexasilacyclododecane                                                                                                                                               | C12 H36 O6 Si6       | 11.293 |
| Decamethylcyclopentasiloxane                                                                                                                                                                                                                    | C10 H30 O5 Si5       | 11.294 |
| 8-Bromo-2-(3-pyridinylcarbonyl)-1,3,4,12a-tetrahydropyrazino[2,1-c][1,4]benzodiazepine-6,12(2H,11H)-dione                                                                                                                                       | C18 H15 Br N4 O3     | 11.398 |
| Unknown                                                                                                                                                                                                                                         | C21 H42 F N O        | 11.42  |
| (9Z)-N-(2-Hydroxyethyl)octadec-9-enamide                                                                                                                                                                                                        | C20 H39 N O2         | 11.521 |
| Unknown                                                                                                                                                                                                                                         | C21 H42 F N O        | 11.623 |
| methyl (1R,15S,17R,18R,19S,20S)-6,18-dimethoxy-17-(3,4,5-trimethoxybenzoyl)oxy-1,3,11,12,14,15,16,17,18,19,20,21-dodecahydroyohimban-19-carboxylate                                                                                             | C33 H40 N2 O9        | 11.859 |
| Unknown                                                                                                                                                                                                                                         | C33 H53 N O8 P2      | 11.908 |
| methyl (1R,15S,17R,18R,19S,20S)-6,18-dimethoxy-17-(3,4,5-trimethoxybenzoyl)oxy-1,3,11,12,14,15,16,17,18,19,20,21-dodecahydroyohimban-19-carboxylate                                                                                             | C33 H40 N2 O9        | 12.151 |
| 5'-O-((1-[(2e)-4-(4-Hydroxy-6-Methoxy-7-Methyl-3-Oxo-1,3-Dihydro-2-Benzofuran-5-Yl)-2-Methylbut-2-En-1-Yl]-1h-1,2,3-Triazol-4-Yl)methyl)adenosine                                                                                               | C28 H32 N8 O8        | 12.154 |
| Unknown                                                                                                                                                                                                                                         | C31 H33 Cl F N O S2  | 12.273 |
| 2,2,6,6-Tetramethyl-4-piperidinol                                                                                                                                                                                                               | C34 H35 N5 O3 S      | 12.36  |
| 3-[(3S,4S,21R)-14-Ethyl-21-(methoxycarbonyl)-4,8,13,18-tetramethyl-20-oxo-9-vinyl-3-phorbiny]propanoic acid (Pheophorbide A)                                                                                                                    | C35 H36 N4 O5        | 12.36  |
| Unknown                                                                                                                                                                                                                                         | C20 H42 F4 N10 O2 P2 | 12.36  |
| 3-[(3S,4S,21R)-14-Ethyl-21-(methoxycarbonyl)-4,8,13,18-tetramethyl-20-oxo-9-vinyl-3-phorbiny]propanoic acid                                                                                                                                     | C35 H36 N4 O5        | 12.548 |
| Unknown                                                                                                                                                                                                                                         | C20 H44 N6 O14       | 12.549 |
| 1'-ethyl-5-[2'-methyl-4'-(5-methyl-1,3,4-oxadiazolyl-2-yl)biphenyl-4-carbonyl]-2,3,6,7-tetrahydrospiro(furo[2,3-f]indole-3,4'-piperidine)                                                                                                       | C33 H34 N4 O3        | 12.702 |
| (1R,9S)-5-[(E)-2-(4-Chlorophenyl)vinyl]-11-(5-pyrimidinylcarbonyl)-7,11-diazatricyclo[7.3.1.02,7]trideca-2,4-dien-6-one                                                                                                                         | C24 H21 Cl N4 O2     | 12.946 |
| 1-isothiocyanatooctane                                                                                                                                                                                                                          | C9 H17 N S           | 12.947 |
| N-[(2S,3R)-1,3-dihydroxyoctadecan-2-yl]dodecanamide                                                                                                                                                                                             | C30 H61 N O3         | 13.034 |
| Decamethylcyclopentasiloxane                                                                                                                                                                                                                    | C10 H30 O5 Si5       | 13.091 |
| N-{4-[4-(4-Chlorophenyl)-1-piperazinyl]benzyl}-2-(dibenzo[b,d]thiophen-2-yl)imidazo[1,2-a]pyridine-3-carboxamide                                                                                                                                | C37 H30 Cl N5 O S    | 13.091 |
| (Z)-docos-13-enamide                                                                                                                                                                                                                            | C22 H43 N O          | 13.638 |
| Unknown                                                                                                                                                                                                                                         | C28 H48 Cl N3 O7 S4  | 13.759 |

**Table S2.** Common and unique compounds identified in different *E. foeminea* crude extracts via Venn diagram analysis using positive ion mode LC–MS.

| Occurrence                   | Total | Compound Name                                                                                                                                                                                                                                                                                                                                                                                                                                                                                                                                                                                                                                                                                                                                                                                                                                                                                                                                                                                                                                                                                                                                                                                                                                                                                                                                                                                                                                                                                                                                                                                                                                                                                                                                                                                            |
|------------------------------|-------|----------------------------------------------------------------------------------------------------------------------------------------------------------------------------------------------------------------------------------------------------------------------------------------------------------------------------------------------------------------------------------------------------------------------------------------------------------------------------------------------------------------------------------------------------------------------------------------------------------------------------------------------------------------------------------------------------------------------------------------------------------------------------------------------------------------------------------------------------------------------------------------------------------------------------------------------------------------------------------------------------------------------------------------------------------------------------------------------------------------------------------------------------------------------------------------------------------------------------------------------------------------------------------------------------------------------------------------------------------------------------------------------------------------------------------------------------------------------------------------------------------------------------------------------------------------------------------------------------------------------------------------------------------------------------------------------------------------------------------------------------------------------------------------------------------|
| ACE DCM/MeOH EA<br>EtOH MeOH | 29    | <p>2-Aminohexadecanoic Acid</p> <p>1-Phenyldecan-1-one</p> <p>(1R,9S)-5-[(E)-2-(4-Chlorophenyl)Vinyl]-11-(5-Pyrimidinylcarbonyl)-7,11-Diazatricyclo[7.3.1.0<sup>2,7</sup>]Trideca-2,4-Dien-6-one</p> <p>(2S,3S,4R)-2-Aminotetradecane-1,3,4-triol</p> <p>(2S,3R)-2-Aminooctadecane-1,3-diol</p> <p>(10E,12E)-9-Oxoctadeca-10,12-Dienoic Acid</p> <p>Hexadecanamide</p> <p>(9Z,11E,13S)-13-Hydroperoxyoctadeca-9,11-Dienoic Acid</p> <p>NP-018660</p> <p>(11E,15Z)-9,10,13-Trihydroxyoctadeca-11,15-Dienoic Acid</p> <p>(9Z,12Z)-N-(2-Hydroxyethyl)Octadeca-9,12-Dienamide</p> <p>Hexadecanoic Acid</p> <p>N-[[ (2R,4S,5R)-5-Vinyl-1-Azabicyclo[2.2.2]Oct-2-yl]Methyl]Cyclohexanecarboxamide</p> <p>Methyl (1R,15S,17R,18R,19S,20S)-6,18-Dimethoxy-17-(3,4,5-Trimethoxybenzoyl)Oxy-1,3,11,12,14,15,16,17,18,19,20,21-Dodecahydroyohimban-19-Carboxylate</p> <p>6-Cyclohexyl-5-(Cyclohexylimino)-4-Thia-6-Azaspiro[2.4]Heptan-7-one</p> <p>(Z)-Docos-13-enamide</p> <p>Exo-1,7,7-Trimethylbicyclo(2.2.1)Hept-2-yl Acrylate</p> <p>N,N-Dimethyldodecan-1-Amine N-Oxide</p> <p>1'-Ethyl-5-[2'-Methyl-4'-(5-Methyl-1,3,4-Oxadiazolyl-2-yl)Biphenyl-4-Carbonyl]-2,3,6,7-Tetrahydrospiro(Furo[2,3-F]Indole-3,4'-Piperidine)</p> <p>(3BS,5AS,7R,8R,10AR,10BS)-7-(Hydroxymethyl)-10b-Methyl-3b,4,5,6,7,8,9,10,10a,10b,11,12-Dodecahydro-5a,8-Methanocyclohepta[5,6]Naphtho[2,1-B]Furan-7-ol</p> <p>Chromen-2-one</p> <p>(2Z,4S,5S,6S,7R,8Z)-2,9-Diphenyldeca-2,8-Diene-3,4,5,6,7,8-hexol</p> <p>(9Z)-Hexadec-9-Enoic Acid</p> <p>OPEO</p> <p>6-O-[(2E)-3-(4-Hydroxyphenyl)-2-Propenoyl]-1-O-[(2E)-3-Phenyl-2-Propenoyl]-Î'-D-Glucopyranose</p> <p>(9Z)-N-(2-Hydroxyethyl)Octadec-9-enamide</p> <p>1-[(2-Hydroxyethyl)Amino]-2-Dodecanol</p> <p>2-(Dimethylamino)Ethyl 3-Cyclohexylpropanoate</p> <p>NP-008563</p> |
| DCM/MeOH EA EtOH<br>MeOH     | 1     | 2-Cyclohexylidenecyclohexan-1-one                                                                                                                                                                                                                                                                                                                                                                                                                                                                                                                                                                                                                                                                                                                                                                                                                                                                                                                                                                                                                                                                                                                                                                                                                                                                                                                                                                                                                                                                                                                                                                                                                                                                                                                                                                        |
| ACE DCM/MeOH<br>EtOH MeOH    | 7     | <p>2,3-Dihydroxybutanedihydrazide</p> <p>Lanosta-8,24-Dien-3beta,23-diol</p> <p>4-Hydroxyquinoline-2-Carboxylic Acid</p> <p>(4Z,6E,8R,10Z)-8-Hydroxyhexadeca-4,6,10-Trienoic Acid</p> <p>2,6-Di-Tert-Butyl-4-Ethylphenol</p> <p>N-[(2S,3R)-1,3-Dihydroxyoctadecan-2-yl]Dodecanamide</p> <p>(2R,3S,4S,5S,6R)-2-[(7-Hydroxy-4-[(3Z)-5-Hydroxy-3-Methylpent-3-en-1-yl]-4a,8,8-Trimethyl-3-Methylidene-Decahydronaphthalen-2-yl)Oxy]-6-(Hydroxymethyl)Oxane-3,4,5-triol</p>                                                                                                                                                                                                                                                                                                                                                                                                                                                                                                                                                                                                                                                                                                                                                                                                                                                                                                                                                                                                                                                                                                                                                                                                                                                                                                                                  |

|                         |    |                                                                                                                                                                                                                                                                                                                                                                                                                                                                                                                                                                                                                                                                                     |
|-------------------------|----|-------------------------------------------------------------------------------------------------------------------------------------------------------------------------------------------------------------------------------------------------------------------------------------------------------------------------------------------------------------------------------------------------------------------------------------------------------------------------------------------------------------------------------------------------------------------------------------------------------------------------------------------------------------------------------------|
| ACE DCM/MeOH EA<br>MeOH | 1  | C20 H44 N6 O13                                                                                                                                                                                                                                                                                                                                                                                                                                                                                                                                                                                                                                                                      |
| ACE DCM/MeOH EA<br>EtOH | 1  | 5-hydroxy-3-methyl-N-[3-[(2R,5R)-5-[3-[(2E)-3-methyl-5-[(2S,3R,4R,5S,6S)-3,4,5-trihydroxy-6-(hydroxymethyl)oxan-2-yl]oxy]pent-2-enamido]propyl]-3,6-dioxopiperazin-2-yl]propyl]pent-2-enamide                                                                                                                                                                                                                                                                                                                                                                                                                                                                                       |
| ACE EA EtOH MeOH        | 11 | 1-Isothiocyanatooctane<br>C25 H49 N5 O8<br>3-[(3S,4S,21R)-14-Ethyl-21-(methoxycarbonyl)-4,8,13,18-tetramethyl-20-oxo-9-vinyl-3-phorbiny]propanoic acid<br>2-Hydroxy-2-methylpropanenitrile<br>3,6,9,12,15,18-Hexaoxaicosane-1,20-diol<br>1-Methylamino-1-(3,4-Methylenedioxyphenyl)Propane<br>Decamethylcyclopentasiloxane<br>(2S,3S,4R)-2-Aminooctadecane-1,3,4-triol<br>N,N-Bis(2-Hydroxyethyl)Dodecan-1-Amine Oxide<br>NP-004713<br>3-[(3R,21S,22S)-16-ethenyl-11-ethyl-12-(hydroxymethylidene)-3-methoxycarbonyl-17,21,26-trimethyl-4-oxo-7,23,24,25-tetrazahexacyclo[18.2.1.15.8.110,13.115,18.02,6]hexacosa-1,5(26),6,8,10,13(25),14,16,18(24),19-decaen-22-yl]propanoic acid |
| ACE DCM/MeOH<br>MeOH    | 1  | C21 H42 F N O                                                                                                                                                                                                                                                                                                                                                                                                                                                                                                                                                                                                                                                                       |
| ACE DCM/MeOH<br>EtOH    | 2  | Cis-N-Butyl-4-(4-Octylphenyl)Cyclohexanamine<br>NP-020214                                                                                                                                                                                                                                                                                                                                                                                                                                                                                                                                                                                                                           |
| ACE DCM/MeOH EA         | 2  | Ethenylbenzene<br>C24 H41 F2 N6 O4 P2                                                                                                                                                                                                                                                                                                                                                                                                                                                                                                                                                                                                                                               |
| ACE EtOH MeOH           | 8  | 2-(Methylamino)-1-Phenylbutan-1-one<br>C23 H45 N5 O7<br>2-Hydroxy-N,N,N-Trimethylethan-1-Aminium<br>9H-Purin-6-Amine<br>(4Z,6E,8S,10Z)-8-hydroxyhexadeca-4,6,10-trienoic acid<br>3-Methyl-1-Phenyl-1,2-Nonadiene<br>(9E,11Z,13E)-octadeca-9,11,13-trienoic acid<br>NP-017152                                                                                                                                                                                                                                                                                                                                                                                                        |
| ACE EA MeOH             | 5  | 2-Ethyl-2-Oxazoline<br>Methyl (4aS,4bS,5aS,6aS,7R,9aS,9bR,10R)-4a,6a-dimethyl-2,5'-dioxo-2,4,4a,4',5a,5',6,6a,8,9,9a,9b,10,11-tetradecahydro-3H,3'H-spiro[cyclopenta[1,2]phenanthro[4,4a-b]oxirene-7,2'-furan]-10-carboxylate<br>2-(Allyl[4-[(2-Ethyl-5,7-Dimethyl-3H-Imidazo[4,5-B]Pyridin-3-yl)Methyl]Phenyl]Amino)-2-Phenyl-N-(Phenylsulfonyl)Acetamide<br>2-Amino-6-(((2-Chlorobenzyl)Oxy)Carbonyl)Amino)Hexanoic Acid<br>N-[4-[4-(4-Chlorophenyl)-1-Piperazinyl]Benzyl]-2-(Dibenzo[B,D]Thiophen-2-yl)Imidazo[1,2-A]Pyridine-3-Carboxamide                                                                                                                                      |
| ACE EA EtOH             | 1  | 3-(2-Hydroxypentyl)phenol                                                                                                                                                                                                                                                                                                                                                                                                                                                                                                                                                                                                                                                           |
| DCM/MeOH MeOH           | 6  | 2,2,4,4,6,6,8,8,10,10,12,12-Dodecamethyl-1,3,5,7,9,11-Hexaoxa-2,4,6,8,10,12-Hexasilacyclododecane<br>3-Butyl-3a,4,5,6-Tetrahydro-2-Benzofuran-1(3H)-one<br>8-(4-Oxo-5-Pent-2-Enylcyclopent-2-en-1-yl)Octanoic Acid<br>C33 H53 N O8 P1<br>8-Bromo-2-(3-pyridinylcarbonyl)-1,3,4,12a-tetrahydropyrazino[2,1-c][1,4]benzodiazepine-6,12(2H,11H)-dione<br>(S)-1-[3-(Dimethylamino)Propyl]-1-(4-Fluorophenyl)-1,3-Dihydroisobenzofuran-5-Carbonitrile                                                                                                                                                                                                                                    |

|               |   |                                                                                                                                                                                                                                                                                                                                                                                                                                                                                                                                                                                                     |
|---------------|---|-----------------------------------------------------------------------------------------------------------------------------------------------------------------------------------------------------------------------------------------------------------------------------------------------------------------------------------------------------------------------------------------------------------------------------------------------------------------------------------------------------------------------------------------------------------------------------------------------------|
| DCM/MeOH EtOH | 3 | 1-[2,6-Bis(4-Ethylphenyl)-4,4a,8,8a-Tetrahydro-[1,3]Dioxino[5,4-D][1,3]Dioxin-4-yl]Ethane-1,2-diol (4E)-1-(4-Hydroxy-3-methoxyphenyl)dec-4-en-3-one<br>Methyl 3-((3-[4-(Methoxycarbonyl)-4-Phenyl-1-Piperidinyl]Propyl)Carbamoyl)-6-Methyl-4-(4-Nitrophenyl)-2-Oxo-1,2,3,4-Tetrahydro-5-Pyrimidinecarboxylate                                                                                                                                                                                                                                                                                       |
| DCM/MeOH EA   | 4 | C17 H33 N5 O4<br>C19 H41 F6 N6 O3 P2<br>NP-020521<br>(12Z)-9,10,11-trihydroxyoctadec-12-enoic acid                                                                                                                                                                                                                                                                                                                                                                                                                                                                                                  |
| ACE DCM/MeOH  | 8 | N,N-Bis(2-Hydroxyethyl)Hexadecanamide<br>(3E,4S)-3-[2-[(1S,4aS,5R,6R,8aS)-6-hydroxy-5-(hydroxymethyl)-5,8a-dimethyl-2-methylidene-3,4,4a,6,7,8-hexahydro-1H-naphthalen-1-yl]ethylidene]-4-hydroxyoxolan-2-one<br>NP-014287<br>C13 H25 F N8 O4 P1<br>4-((1R,3S,5S,8R,10R,11R,13R,14S,17R)-1,5,11,14-tetrahydroxy-10-(hydroxymethyl)-13-methyl-3-((2R,3R,4R,5R,6S)-3,4,5-trihydroxy-6-methyl-tetrahydro-2H-pyran-2-yloxy)-hexadecahydro-1H-cyclopenta[a]phenanthren-17-yl)furan-2(5H)-one<br>2-[1-(2H-1,3-benzodioxol-5-yl)propan-2-yl]-6-methoxy-4-(prop-2-en-1-yl)phenol<br>NP-020014<br>C32 H62 O6 |
| EtOH MeOH     | 7 | 1,1-Dimethylpyrrolidin-1-ium-2-Carboxylic Acid<br>(9E,12Z)-10-Nitrooctadeca-9,12-dienoic acid<br>2,2,6,6-Tetramethyl-1,4-Piperidinediol<br>(2R)-4-methyl-2-[[[(2S)-1-phenylmethoxycarbonylpyrrolidine-2-carbonyl]amino]pentanoic acid<br>1,6-Dimethyl-1,6-Dinitroso-Biurea<br>1-Methylpyridin-1-ium-3-Carboxylate<br>C28 H48 Cl N3 O7 S3                                                                                                                                                                                                                                                            |
| EA MeOH       | 3 | (9Z,12Z,15Z)-octadeca-9,12,15-trienoic acid<br>2,2,6,6-Tetramethyl-4-Piperidinol<br>C33 H56 F2 O3                                                                                                                                                                                                                                                                                                                                                                                                                                                                                                   |
| ACE MeOH      | 5 | C4 H10 F2 N2 O4<br>NP-021293<br>C20 H31 F3 O5<br>C31 H53 F3 N4 O<br>5'-O-([1-[(2E)-4-(4-Hydroxy-6-Methoxy-7-Methyl-3-Oxo-1,3-Dihydro-2-Benzofuran-5-yl)-2-Methylbut-2-en-1-yl]-1h-1,2,3-Triazol-4-yl]Methyl)Adenosine                                                                                                                                                                                                                                                                                                                                                                               |
| EA EtOH       | 3 | C32 H58 O6<br>3,5-Dichloro-2'-O-Methylnorstenosporic Acid<br>C13 H12 Cl2 N8 O3                                                                                                                                                                                                                                                                                                                                                                                                                                                                                                                      |
| ACE EtOH      | 5 | C32 H45 F O2 P1<br>1-Methylpyrrolidin-2-one<br>C19 H35 F N3 O2 P<br>2-[(3S)-1-(Cyclohexylmethyl)-3-pyrrolidinyl]-1H-benzimidazole-5-carbonitrile<br>Apigenin 7- (3",6"-Di-P-Coumarylglucoside)                                                                                                                                                                                                                                                                                                                                                                                                      |
| ACE EA        | 6 | C32 H49 F N3 O8 P<br>C26 H49 F O<br>4,6-Dimethylpyrimidin-2-Amine<br>C9 H17 F3 N3<br>Pyridine-3-Carboxamide<br>3,6,9,12,15-Pentaoxaheptadecan-1,17-diol                                                                                                                                                                                                                                                                                                                                                                                                                                             |

|     |                                                                                                                                        |
|-----|----------------------------------------------------------------------------------------------------------------------------------------|
| 225 | 5,5-Bis(Methylperoxy)Nonane                                                                                                            |
|     | C32 H63 N O4                                                                                                                           |
|     | 3-Ethyl-N-[(2S,3R)-3-Hydroxy-1-Phenyl-4-[[3-(Trifluoromethyl)Benzyl]Amino]-2-Butanyl]-7-(2-Oxo-1-Pyrrolidinyl)-1h-Indole-5-Carboxamide |
|     | (9aR,9bS)-9a-Hydroxy-6,9-dimethyl-3-methylene-3,3a,4,5,9a,9b-hexahydroazuleno[4,5-b]furan-2,7-dione                                    |
|     | C38 H35 F2 N O4                                                                                                                        |
|     | C33 H59 F O3 S                                                                                                                         |
|     | 4-Methylpyridine-2,3-Diamine                                                                                                           |
|     | (3,4-Dimethylphenyl)Methanol                                                                                                           |
|     | C23 H30 Cl N7 O2 S1                                                                                                                    |
|     | 4,4-Difluoropregn-5-Ene-3,20-dione                                                                                                     |
|     | 2-Aminoethyl (Allylamino)Methanedithioate Hydrochloride                                                                                |
|     | (4aR,9aS)-7-Ethynyl-4a,9a-Dimethyl-1-Methylene-2,3,4,4a,5,6,9,9a-Octahydro-1H-Benzo[7]Annulene                                         |
|     | 1-[[4-(2,5-Dimethyl-1h-Pyrrol-1-yl)Benzoyl]Oxy]Dihydro-1h-Pyrrole-2,5-dione                                                            |
|     | Azacyclotridecan-2-one                                                                                                                 |
|     | C45 H70 O4                                                                                                                             |
|     | 3-Hydroxy-N-(1-Hydroxy-4-Methylpentan-2-yl)-5-Oxo-6-Phenylhexanamide                                                                   |
|     | C53 H33 Cl F3 N                                                                                                                        |
|     | (1S,4S,5aS,9aS)-1,7,7-Tributyl-4-(Hydroxymethyl)-5a-Methyldecahydro-2H-3-Benzazepin-2-one                                              |
|     | 4,10-Dihydroxy-10-Methyl-Dodecan-4-olide                                                                                               |
|     | C21 H26 Cl N9 O2 S1                                                                                                                    |
|     | C44 H85 F2 N4 O2 P                                                                                                                     |
|     | C19 H40 O3                                                                                                                             |
|     | N-(9-Oxodecyl)Acetamide                                                                                                                |
|     | (Z)-N-Hydroxy-11-Methyldodec-2-enamide                                                                                                 |
|     | C30 H59 N O P1                                                                                                                         |
|     | C28 H62 F N5 O7                                                                                                                        |
|     | N-[2-[2-(2-Aminoethoxy)Ethoxy]Ethyl]Octadecanamide                                                                                     |
|     | C37 H36 F2 N3 O2 P                                                                                                                     |
|     | C27 H59 N8 P                                                                                                                           |
|     | C3 H F4 P                                                                                                                              |
|     | 4-Isopropylbenzaldehyde                                                                                                                |
|     | (E)-4-(2,6,6-Trimethylcyclohexen-1-yl)But-3-en-2-one                                                                                   |
|     | C21 H45 N                                                                                                                              |
|     | N-[(Benzyloxy)Carbonyl]-L-Valyl-N-[(2S)-4-[(4-Benzyl-5-Oxo-2,5-Dihydro-3-Furanyl)Oxy]-1-Carboxy-3-Oxo-2-Butanyl]-L-Alaninamide         |
|     | C22 H38 F3 N O                                                                                                                         |
|     | 3-[2-Carboxyethyl(Dodecyl)Amino]Propanoic Acid                                                                                         |
|     | Hexadecyl(Trimethyl)Azanium                                                                                                            |
|     | C28 H53 N O2 S                                                                                                                         |
|     | 3,5,7-Trimethyl-1-Azatricyclo[3.3.1.1~3,7~]Decane-2,8-diol                                                                             |
|     | (2E,4E)-N-(2-methylpropyl)icosa-2,4-dienamide                                                                                          |
|     | (2Z)-2-Hepten-1-ylbenzene                                                                                                              |
|     | (2R,3R,4S)-1-Butyl-2-[[[(9Z)-9-Octadecen-1-yloxy]Methyl]-3,4-Pyrrolidinediol                                                           |
|     | C38 H71 N O5                                                                                                                           |
|     | C41 H70 F2 N7 P                                                                                                                        |
|     | N-(8Z,11Z,14Z-eicosatrienoyl)-ethanolamine                                                                                             |

C51 H80 F2 O  
 (4aS,5S,6S,8aS)-2-(6,10-dimethyl-2-undecanyl)-5,8a-dimethyldecahydro-6-isoquinolinol  
 C18 H29 F3 O2  
 (1R,6SR,10sSR)-6,10-dimethylbicyclo[4.4.0]decan-3-one  
 C43 H35 Cl F2 N O2 P  
 C31 H31 Cl F N S1  
 (1S,2S,4R,8S,9S,11S,12R,13S,19S)-12,19-difluoro-11-hydroxy-8-(2-hydroxyacetyl)-6,6,9,13-tetramethyl-5,7-dioxapentacyclo[10.8.0.02,9.04,8.013,18]jicosa-14,17-dien-16-one  
 (5alpha,7alpha)-3-Amino-20-Methylpregnan-7-ol  
 C18 H29 F3 O3  
 1-Phenylethanone  
 (2E)-3,7-Dimethylocta-2,6-Dien-1-yl Acetate  
 N-[(2S)-1-[3-(adamantan-1-yl)-2,4-dioxo-1-imidazolidinyl]-6-amino-2-hexanyl]dodecanamide  
 (2R,3S,4R,2'R,3'S,4'R)-5,5'-(Cyclododecylimino)Di(1,2,3,4-Pentanetetrol)  
 C23 H49 N  
 1-Methyl-2-Propylpiperidine  
 C24 H54 F N5 O4  
 C20 H36 F3 N O  
 C20 H46 F N5 O2  
 C30 H57 N O4  
 5,7-Diisopropyl-1,1-Dimethyl-1,2,3,4-Tetrahydronaphthalene  
 1-Methyl-4-Propan-2-ylbenzene  
 C3 H10 F2 N3 O2 P  
 C25 H53 F3 N4 O3  
 Ethyl (8Z,11Z,14Z)-8,11,14-icosatrienoate  
 C16 H38 F N5 O  
 C21 H31 F O S  
 (1R,4aS,10aS)-7-(2-hydroxypropan-2-yl)-1,4a-dimethyl-9-oxo-3,4,10,10a-tetrahydro-2H-phenanthrene-1-carboxylic acid  
 C4 H5 F2 N O4  
 [(1E,4E)-5,9-Dimethyl-1,4,8-Decatrien-1-yl]Benzene  
 N,N-Dimethyloctadecanamide  
 Octamethyl-1,3,5,7,2,4,6,8-Tetroxatetrasilocane  
 C32 H60 O6  
 1,2,3,4,5-Pentamethylbenzene  
 C10 H23 F N8 O  
 N-[(2s,3s)-3-Fluoro-1-Hydroxy-2-Dodecanyl]Hexanamide  
 3-[(4r,7s,8as)-7-[(Isopropylcarbamoyl)Amino]-1-Oxo-octahydropyrrolo[1,2-A]pyrazin-4-yl]-N-(4-Methoxybenzyl)Propanamide  
 (Rs)-1-[2-(Allyloxy)Phenoxy]-3-(Isopropylamino)Propan-2-ol  
 C27 H38 F2 N10 O4 S  
 C21 H37 F4 N O8  
 C27 H50 F2 N3 O P  
 N-[(1-[(4s)-3-[(2-Methyl-2-Propanyl)Oxy]Carbonyl]-1,3-Thiazolidin-4-yl]Carbonyl]-4-Phenyl-4-Piperidiny]Carbonyl]-L-Leucine  
 (6s)-6-[(1z)-But-1-en-1-yl]Cyclohepta-1,4-Diene  
 N-(1,3-Benzodioxol-5-yl)-7-Chloroquinolin-4-Amine  
 1-Benzyl-4-Propylamino-4-Piperidinecarboxamide  
 N,N-Bis(2-Hydroxyethyl)Dodecanamide

C12 H31 Cl N5  
1,2,7,7-Tetramethylbicyclo[2.2.1]Hept-2-Ene  
C22 H28 F5 N4  
3,5-Di-Tert-Butyl-4-Hydroxybenzaldehyde  
3-Dodecoxypropan-1-Amine  
C21 H35 Cl F N7 S2  
C31 H38 F3 N2 O5 P  
C25 H42 F N S  
C16 (2S,3S,4R)-2-Aminooctadecane-1,3,4-triol  
C30 H67 N6 O P  
C29 H38 F4 O8  
(3r,4e)-5-(4-Methoxy-5-Methyl-6-Oxopyran-2-yl)-3-Methylhex-4-Enoate  
N-(2-Hydroxyethyl)-9-Octadecenamide  
1,1,6-Trimethyl-1,2-Dihydronaphthalene  
C18 H38 F N O  
(5z,9Z,12Z)-Octadeca-5,9,12-Trienoic Acid  
1-Hydroxy-2,2,6,6-Tetramethylpiperidin-4-ol  
(2S, 3R, 4E, 8E)1-(β-D-glucopyranosyl)-3-hydroxy-2-[(R)-2'-hydroxyhexadecanoyl]amino-9-methyl-4, 8-heptadecadiene  
5-(But-3-en-1-yl)-3-Propyldihydrofuran-2(3H)-one  
C5 H F2 O P  
Cyclohexene  
(E)-3-(2-Hydroxyphenyl)Prop-2-Enoic Acid  
C15 H39 F4 N10 O2 P3 S  
C45 H87 F2 O4 P  
(9Z)-1-(4-Morpholinyl)-9-Octadecen-1-one  
C32 H46 F1  
C30 H55 F N4 O  
1-Oxa-4-Azacyclohexadecan-16-one  
C23 H46 F5 N10 O P S  
C15 H30 N2 O7 S  
C15 H34 N2 O1  
Octadec-9-Ynoic Acid  
2-[[[(5S,6R,9S)-14-[[[(2-Fluoroanilino)-Oxomethyl]Amino]-5-Methoxy-3,6,9-Trimethyl-2-Oxo-11-Oxa-3,8-Diazabicyclo[10.4.0]Hexadeca-1(12),13,15-Trien-8-yl]Methyl]Benzoic Acid  
8-[(1S,5R)-4-Oxo-5-[(Z)-pent-2-enyl]cyclopent-2-en-1-yl]octanoic acid  
(2E,4E)-11-methoxy-3,7,11-trimethyl-2,4-dodecadienamide  
(1,3-Dimethyl-4-Phenylpiperidin-4-yl) Propanoate  
1-(3,3,5-Trimethyl-1-Cyclohexen-1-yl)-4-Penten-1-one  
C12 H12 Cl F N10 S1  
C31 H56 F N O S  
1,3-Di(Propan-2-yl)Benzene  
C25 H49 N5 O2  
C30 H58 F N5 O1  
[(3E)-6-Methyl-3-Hepten-1-yl]Benzene  
C39 H31 F2 N5 O1  
C5 H2 F O2 P  
C6 H12 F3 N2 O5 P

C42 H27 Cl F N2  
C53 H83 F O1  
1-(9Z-Hexadecenoyl)-2-(9Z,12Z-Octadecadienoyl)-Sn-Glycerol  
C39 H81 F N9 O P  
N-Dodecyl-N-[2-({[(11beta,16alpha,17alpha)-9-Fluoro-11,17-Dihydroxy-16-Methyl-3-Oxoandrosta-1,4-Dien-17-yl]Carbonyl}Amino)Ethyl]-N-Methyl-1-Dodecanaminium  
C39 H58 F2 O2  
(4S,5S)-4-Methyl-5-Undecyl-1,3-Oxazolidin-2-one  
1-Dodecyl-5-Hexyl-1h-Imidazol-2-Amine  
1-Ethenyl-2,4-Dimethylbenzene  
2-Octadecylfuran  
N-[2-(Diethylamino)Ethyl]-2-{6-[2-(2,3-Difluorophenyl)Ethyl]-2,3-Dimethyl-4-Oxo-1(4H)-Pyridinyl]-N-{{4'-(Trifluoromethyl)-4-Biphenyl}Methyl}Acetamide  
12-Aminododecyl 2,6-Diamino-2,6-Dideoxy-Beta-D-Glucopyranoside  
N-[(2S,3R,4E)-1-[(5R)-5-Ethyl-Alpha-L-Arabinopyranosyl]Oxy]-3-Hydroxy-4-Octadecen-2-yl]Heptanamide  
Docosanamide  
2-Acetamido-3-Sulfanylpropanoic Acid  
C21 H31 N2 O2 P S3  
Hept-2-Ynylbenzene  
2-(Hydroxymethyl)-2-(Octylamino)-1,3-Propanediol  
C30 H51 F O8 P1  
C32 H57 F3 N3 O3 P2  
2-{2-[2-(Dodecyloxy)Ethoxy]Ethoxy}Ethanol  
C24 H46 N2 O1  
C25 H29 Cl N9 P S  
C36 H59 F3 O2  
C40 H75 N O5  
4-[(2-Methyl-4-Quinoliny)Methoxy]-N-({2,4,6-Trioxo-5-[4-(3-Pyridinylcarbonyl)-1-Piperazinyl]Hexahydro-5-Pyrimidinyl}Methyl)Benzamide  
C16 H33 N O5  
N-[1-(1,4'-Bipiperidin-1'-yl)-3-Methyl-1-Oxo-2-Butanyl]-4-Methylcyclohexanecarboxamide  
N-Methyl-N-Octyloctan-1-Amine  
1-Hydroxy-2,2,6,6-Tetramethylpiperidine (Tempo)  
(9Z)-Tetradec-9-Enoic Acid  
C18 H41 F3 N7 O4 P  
C15 H29 N5 O3  
7-[(2E)-3,7-Dimethyl-2,6-Octadien-1-yl]-6-(Methoxyamino)-9-Methyl-9H-Purin-7-Ium  
Octadecanamide  
N,S-Ditrityl-L-Cysteine  
C32 H60 O4  
C50 H84 F2 O  
C30 H58 O5 S  
(2E,4e)-N-Isobutyl-2,4-Octadecadienamide  
C29 H57 N O2  
C21 H45 N3 O4  
10-Oxo-10-[(3-Oxoolean-12-en-28-yl)Oxy]Decanoic Acid  
C16 H38 F N5 O1  
C37 H43 Cl F N S3

NP-006888  
 C19 H30 F1  
 C19 H41 N  
 C19 H41 N3 O5  
 C16 H27 F3 O1  
 [(E)-Hept-1-Enyl]Benzene  
 2-(Dibutylamino)Ethanol  
 N,N'-(2-Hydroxy-1,3-Propanediyl)Dioctanamide  
 C16 H33 Cl F4 N4 O3 S2  
 C12 H34 N9 O4 P S  
 Cyclohexanecarboxamide, N-Ethyl-5-Methyl-2-(1-Methylethyl)-  
 5-(2-Ethoxyphenyl)-1-Methyl-3-Propyl-1,6-Dihydro-7h-Pyrazolo[4,3-D]Pyrimidin-7-one  
 (9Z)-N-[(3R)-2-Oxo-3-Azepanyl]-9-Octadecenamamide  
 3-Methyl-2-[(2Z)-Pent-2-en-1-yl]Cyclopent-2-en-1-one  
 C30 H59 F3 O1  
 C13 H25 F N6 O4  
 1,4-Cyclohexadiene  
 C33 H54 N4 O  
 N-[(2S)-4-[(5-Chloro-2-Pyridinyl)Amino]-1,4-Dioxo-1-(1-Piperidinyl)-2-Butanyl]-2'-{[(2-Methoxyethyl)(Methyl)Amino]Methyl}-4-Biphenylcarboxamide  
 Beyer-15-en-19-yl Stearate  
 (5Z,9Z,12Z)-Octadeca-5,9,12-Trienoic Acid Ethyl Ester  
 C31 H57 N O5  
 C10 H23 F2 N6 O7 P S1  
 N-(2-Hydroxyethyl)-N-Methyloctadecanamide  
 C25 H53 N  
 N-[(E,2S,3R)-1,3-Dihydroxyoctadec-4-en-2-yl]Acetamide  
 C16 H29 F N2 O3 S1  
 C34 H68 N2 O1  
 NP-016596  
 C19 H39 O4 P2  
 C12 H27 F3 N4 S  
 N-(2-Hydroxyethyl)Octadecanamide  
 (E)-3-(2-Hydroxyphenyl)Prop-2-Enoic Acid (O-Coumaric Acid)  
 N-(6-Amino-1-Isobutyl-2,4-Dioxo-1,2,3,4-Tetrahydro-5-Pyrimidinyl)-3-Cyclohexyl-N-Isobutylpropanamide  
 (Z)-N-(2-Hydroxyethyl)Icos-11-enamide  
 C29 H37 F N5  
 C42 H85 F N2 O P2 S  
 (5S)-4-(Cyclohexylmethyl)-1-{4-[(2S)-1-(Cyclohexylmethyl)-5,6-Dioxo-2-Piperazinyl]Butyl}-5-Isobutyl-2,3-Piperazinedione  
 9-[3-[(4-Cyclohexylbutanoyl)Amino]-3-Deoxy-Beta-D-Xylofuranosyl]-9H-Purin-6-Amine  
 C32 H34 N3 P  
 C36 H77 N7 O P1  
 C38 H65 F3 O3  
 (9Z,12Z,15Z)-N-(2-Hydroxyethyl)Octadeca-9,12,15-Trienamide  
 [(3S,4S,6S)-3,4-Dihydroxy-6-[5-Hydroxy-2-(4-Hydroxyphenyl)-4-Oxochromen-7-yl]Oxy-5-[(E)-3-(4-Hydroxyphenyl)Prop-2-Enoyl]Oxyoxan-2-yl]Methyl (E)-3-(4-Hydroxyphenyl)Prop-2-Enoate

|      |    |                                                                                                                                                                                                                                                                                                                                                                                                                                                                                                                                                                                                                                                                                                                                                                                                                         |
|------|----|-------------------------------------------------------------------------------------------------------------------------------------------------------------------------------------------------------------------------------------------------------------------------------------------------------------------------------------------------------------------------------------------------------------------------------------------------------------------------------------------------------------------------------------------------------------------------------------------------------------------------------------------------------------------------------------------------------------------------------------------------------------------------------------------------------------------------|
|      |    | C20 H39 N O2 P1<br>(4R,4'S)-2'-(3-Chlorophenyl)-5'-Phenyl-4'-(2-Thienyl)-2,2',3,4'-Tetrahydro-5h-Spiro[1-Benzothiepine-4,3'-Pyrazol]-5-one<br>N-Dodecyl-3,4,5-Trihydroxybenzamide<br>C31 H33 Cl F N O S1<br>C27 H51 N O2<br>3-[(3S,4S,21R)-14-Ethyl-21-(methoxycarbonyl)-4,8,13,18-tetramethyl-20-oxo-9-vinyl-3-phorbiny]propanoic acid (Pheophorbide A)<br>Hexadecanedioic Acid<br>5,6-Epoxy-24(R)-Methylcholesta-7,22-Dien-3i'-ol<br>2-Amino-4,6-Dimethylpyrimidine<br>N-(Tert-Butyl)-N'-(2-Hydroxyethyl)Urea<br>3-(1-Hydroxyethyl)-2,3,6,7,8,8a-Hexahydropyrrolo[1,2-A]Pyrazine-1,4-dione<br>2,3,6-Trimethylphenol<br>C20 H42 F4 N10 O2 P1                                                                                                                                                                           |
| EtOH | 18 | C26 H36 F2 N8 O3 P1<br>N-(3-Methylbutanoyl)-D-Valyl-N-[(3s)-1-[[[(2r)-1-[[[(2r)-1,2-Dihydroxy-5-Methyl-3-Hexanyl]Amino]-1-Oxo-2-Propanyl]Amino]-3-Hydroxy-6-Methyl-1-Oxo-4-Heptanyl]-D-Valinamide<br>3-(4-Tert-Butylphenyl)-1-(4-Methoxyphenyl)Propane-1,3-dione<br>C13 H29 F O P1<br>C38 H35 F3 N2 O<br>C27 H47 Cl N O3 P S3<br>N-[(2R)-2,3-Dihydroxypropyl]-5-Fluoro-2-[(2-[[4-(4-Isopropyl-1-Piperazinyl)-2-Methoxyphenyl]Amino]-1h-Pyrrolo[2,3-D]Pyrimidin-4-yl)Amino]Benzamide<br>C39 H80 F3 N O P2 S<br>C32 H35 F2 N4 O4 P<br>C39 H74 F3 N9 O3<br>C20 H46 F2 N10 O2 S2<br>C28 H52 F6 N3 O P2<br>C37 H28 Cl N5 S<br>C36 H76 F2 N3 O7 P<br>C26 H58 F N5 O11<br>3-Hydroxy-2,2-Bis[(Nonanoyloxy)Methyl]Propyl Nonanoate<br>1-(3-Cyano-3,3-Diphenylpropyl)-4-Phenylpiperidine-4-Carboxylic Acid<br>2-Methylpropanamine |
| EA   | 14 | C22 H48 F2 N3 O6 P<br>C36 H55 O11 P<br>C35 H36 N4 O4<br>C42 H31 Cl F3 N3 O1<br>4-Oxododecanedioic Acid<br>1-Ethynyl-4-Octylbenzene<br>C12 H25 F2 N2 O P<br>3-(4-Hydroxy-3-Methoxyphenyl)-N-{4-[3-(4-Hydroxy-3-Methoxyphenyl)Propanamido]Butyl}Propanamide<br>C6 H11 F3 O3<br>11-Aminoundecanoic Acid<br>C16 H24 F4 O1<br>C17 H32 N2 O9                                                                                                                                                                                                                                                                                                                                                                                                                                                                                  |

|     |    |                                                                                                                                                                                                                                                                                                                                                                                                                                                                                                                                                                                                                                                                                                                                                                                                                                                                                                                                                                                                                                                                                                                                                                                                                                                                                                                                                                                                                                                                                                                              |
|-----|----|------------------------------------------------------------------------------------------------------------------------------------------------------------------------------------------------------------------------------------------------------------------------------------------------------------------------------------------------------------------------------------------------------------------------------------------------------------------------------------------------------------------------------------------------------------------------------------------------------------------------------------------------------------------------------------------------------------------------------------------------------------------------------------------------------------------------------------------------------------------------------------------------------------------------------------------------------------------------------------------------------------------------------------------------------------------------------------------------------------------------------------------------------------------------------------------------------------------------------------------------------------------------------------------------------------------------------------------------------------------------------------------------------------------------------------------------------------------------------------------------------------------------------|
|     |    | C21 H39 F6 N10 O P<br>Ethyl Hydrogen [(1S,4S)-Dispiro[Cyclohexane-1,3'-[1,2,4]Trioxolane-5',2''-Tricyclo[3.3.1.1~3,7~]Decan]-4-ylmethyl]Phosphonate                                                                                                                                                                                                                                                                                                                                                                                                                                                                                                                                                                                                                                                                                                                                                                                                                                                                                                                                                                                                                                                                                                                                                                                                                                                                                                                                                                          |
| ACE | 29 | C34 H61 N O4<br>C25 H39 F2 N<br>3-(4-Hydroxyphenyl)-1-(2,4,6-Trihydroxyphenyl)Propan-1-one<br>N-(2-Aminoethyl)-N'-(1,5-Dicyclohexyl-3-Pentanyl)-1,2-Ethanediamine<br>1-{2-[(11AS)-5-(4-Isopropylphenyl)-1,3-Dioxo-5,6,11,11A-Tetrahydro-1h-Imidazo[1',5':1,6]Pyrido[3,4-B]Indol-2(3H)-yl]Benzoyl}-4-Piperidinecarboxylic Acid<br>(3BS,5AS,7R,8R,10AR,10BS)-3b,4,5,6,7,8,9,10,10a,10b-Decahydro-7-Hydroxy-10b-Methyl-5a,8-Methano-5ah-Cyclohepta(5,6)Naphtho(2,1-B)Furan-7-Methanol<br>C34 H57 F3 O2<br>C40 H50 F3 N2 O3 P<br>2-[1-(Aminomethyl)Cyclohexyl]Acetic Acid<br>3-Hydroxy-3,4-Bis[(4-Hydroxy-3-Methoxyphenyl)Methyl]Oxolan-2-one<br>C44 H35 Cl2 F2 N O<br>C17 H43 F5 N10 O3 P1<br>N-[2-(3,4-Dimethoxyphenyl)Ethyl]-2-({2-[2-(1-Piperidinyl)Ethyl][1,2,4]Triazolo[1,5-C]Quinazolin-5-yl]Sulfanyl)Acetamide<br>C12 H15 Cl2 F2 N6 O2 P<br>C26 H33 Cl F N7 O3 S1<br>Bicyclohexyliden-2-one<br>C34 H54 F2 N3<br>3,5,7-Trihydroxy-2-(4-Hydroxyphenyl)-4H-1-Benzopyran-4-one<br>3-(Dimethylamino)Propyl Acrylate<br>C30 H57 F3 O4<br>NP-015468<br>C41 H78 F N O4 P1<br>4-(Hydroxyamino)-1-({1-Hydroxy-1-[2-(Hydroxymethyl)-1-Pyrrolidinyl]-3-Methyl-2-Butanyl}Amino)-2-Pentyl-1,4-Butanediol<br>(2E,4S)-4-[(2-Oxoheptadecanoyl)Amino]-2-Octenoic Acid<br>C33 H56 N4 O2<br>C36 H57 F3 O2<br>(5alpha,17alpha)-3,3-Difluoropregn-20-Yn-17-ol<br>5,7-Dihydroxy-2-(4-Hydroxyphenyl)-8-[3,4,5-Trihydroxy-6-(Hydroxymethyl)Oxan-2-yl]-6-(3,4,5-Trihydroxyoxan-2-yl)Chromen-4-one<br>4-Oxo-3,4-Dihydroquinazoline-2-Carbohydrazide |

**Table S3.** Identified metabolites in *E. foeminea* crude extracts analyzed by negative mode LC–MS. **(a)** acetone.

| Compound Name                           | Formula           | RT [min] |
|-----------------------------------------|-------------------|----------|
| (2R,3S,4S,5R)-hexane-1,2,3,4,5,6-hexol  | C6 H14 O6         | 0.596    |
| Unknown                                 | C2 H N3 O5 P2     | 0.661    |
| Unknown                                 | C3 H4 N2 O8 P2 S3 | 0.664    |
| Unknown                                 | C3 H N3 O6 P2     | 0.669    |
| 9,10,13-trihydroxy-11-octadecenoic acid | C18 H34 O5        | 7.418    |
| Hexadecanedioic acid                    | C16 H30 O4        | 7.543    |
| 10,16-Dihydroxyhexadecanoic acid        | C16 H32 O4        | 7.684    |
| dihexyl (E)-but-2-enedioate             | C16 H28 O4        | 7.732    |

|                                                                                                                                                              |                   |        |
|--------------------------------------------------------------------------------------------------------------------------------------------------------------|-------------------|--------|
| [(2S,3R,4S,5S,6R)-2-[5,7-dihydroxy-2-(4-hydroxyphenyl)-4-oxochromen-8-yl]-4,5-dihydroxy-6-(hydroxymethyl)oxan-3-yl] (E)-3-(4-hydroxyphenyl)prop-2-enoate     | C30 H26 O12       | 7.798  |
| Unknown                                                                                                                                                      | C36 H27 N2 O6 P S | 7.798  |
| [(2S,3R,4S,5S,6R)-2-[5,7-dihydroxy-2-(4-hydroxyphenyl)-4-oxochromen-8-yl]-4,5-dihydroxy-6-(hydroxymethyl)oxan-3-yl] (E)-3-(4-hydroxyphenyl)prop-2-enoate     | C30 H26 O12       | 7.887  |
| Hexadecanedioic acid                                                                                                                                         | C16 H30 O4        | 7.92   |
| (3-hydroxy-9-methyldecyl) 4-hydroxybenzoate                                                                                                                  | C18 H28 O4        | 8.196  |
| dipentyl benzene-1,2-dicarboxylate                                                                                                                           | C18 H26 O4        | 8.64   |
| exo-1,7,7-Trimethylbicyclo(2.2.1)hept-2-yl acrylate                                                                                                          | C13 H20 O2        | 8.754  |
| 8-Hydroxyluteolin 4'-methyl ether 7- (6'''-acetylallosyl) (1->2) (6''-acetylglucoside)                                                                       | C32 H36 O19       | 9.171  |
| 6-Hydroxyluteolin 6-glucoside-7- [ 6'''- (3-hydroxy-3-methylglutaryl) glucoside ]                                                                            | C33 H38 O21       | 9.176  |
| Unknown                                                                                                                                                      | C42 H31 F6 O7 P   | 9.176  |
| Unknown                                                                                                                                                      | C29 H29 Cl N10    | 9.178  |
|                                                                                                                                                              | O13               |        |
| 11β,17,20R,21-tetrahydroxy-pregna-1,4-dien-3-one                                                                                                             | C21 H30 O5        | 9.998  |
| (9Z)-(13S)-12,13-Epoxyoctadeca-9,11-dienoic acid                                                                                                             | C18 H30 O3        | 10     |
| (9S,10S)-9,10-Dihydroxyoctadecanoate                                                                                                                         | C18 H36 O4        | 10.016 |
| (9Z)-(13S)-12,13-Epoxyoctadeca-9,11-dienoic acid                                                                                                             | C18 H30 O3        | 10.078 |
| 13S-hydroperoxy-9Z,11E,14Z-octadecatrienoic acid                                                                                                             | C18 H30 O4        | 10.266 |
| (6R,10R,11S,13S,17R)-6,11,17-trihydroxy-17-(2-hydroxyacetyl)-10,13-dimethyl-2,6,7,8,9,11,12,14,15,16-decahydro-1H-cyclopenta[a]phenanthren-3-one             | C21 H30 O6        | 10.267 |
| Unknown                                                                                                                                                      | C14 H25 F3 O10    | 10.271 |
| (9Z,15Z)-(13S)-12,13-Epoxyoctadeca-9,11,15-trienoic acid                                                                                                     | C18 H28 O3        | 10.274 |
| (8S,9S,10R,11S,13S,14S,17R)-17-[(1S)-1,2-dihydroxyethyl]-11,17-dihydroxy-10,13-dimethyl-2,6,7,8,9,11,12,14,15,16-decahydro-1H-cyclopenta[a]phenanthren-3-one | C21 H32 O5        | 10.575 |
| (2E)-3-(3,4-Dihydroxyphenyl)prop-2-enoic acid                                                                                                                | C18 H32 O4 Si3    | 10.578 |
| 12R,13S-epoxy-9Z-octadecenoic acid                                                                                                                           | C18 H32 O3        | 10.58  |
| (9Z)-(13S)-12,13-Epoxyoctadeca-9,11-dienoic acid                                                                                                             | C18 H30 O3        | 10.81  |
| Unknown                                                                                                                                                      | C35 H63 F O9      | 10.812 |
| (7S,8S,9Z,12Z)-7,8-dihydroxyoctadeca-9,12-dienoic acid                                                                                                       | C18 H32 O4        | 10.813 |
| Unknown                                                                                                                                                      | C17 H26 F2 O9     | 10.813 |
| 2-Oxo-octadecanoic acid                                                                                                                                      | C18 H34 O3        | 11.148 |
| 12R,13S-epoxy-9Z-octadecenoic acid                                                                                                                           | C18 H32 O3        | 11.356 |
| 12,13-dihydroxy-9Z-octadecenoic acid                                                                                                                         | C18 H34 O4        | 11.358 |
| 12R,13S-epoxy-9Z-octadecenoic acid                                                                                                                           | C18 H32 O3        | 11.432 |
| 12,13-dihydroxy-9Z-octadecenoic acid                                                                                                                         | C18 H34 O4        | 11.435 |
| (8S,10S,13S,14S,17S)-17-acetyl-10,13-dimethyl-1,2,6,7,8,12,14,15,16,17-decahydrocyclopenta[a]phenanthren-3-one                                               | C21 H28 O2        | 11.457 |
| Unknown                                                                                                                                                      | C14 H25 F3 O8     | 12.412 |
| 9Z,11E-octadecadienoic acid                                                                                                                                  | C18 H32 O2        | 13.071 |
| Unknown                                                                                                                                                      | C6 H4 Fe S        | 13.075 |
| Unknown                                                                                                                                                      | C17 H26 F2 O7     | 13.078 |
| Unknown                                                                                                                                                      | C6 H4 Fe S        | 13.743 |
| Unknown                                                                                                                                                      | C15 H26 F2 O7     | 13.748 |

**(b) dichloromethane/methanol extract.**

| Compound Name                          | Formula           | RT [min] |
|----------------------------------------|-------------------|----------|
| (2R,3S,4S,5R)-hexane-1,2,3,4,5,6-hexol | C6 H14 O6         | 0.602    |
| Unknown                                | C3 H4 N2 O8 P2 S3 | 0.666    |
| Unknown                                | C3 H N3 O6 P2     | 0.672    |
| Tetrachloro(hydrido)iron               | H Cl4 Fe          | 1.471    |

|                                                                                                                                                              |                        |        |
|--------------------------------------------------------------------------------------------------------------------------------------------------------------|------------------------|--------|
| 1(2H)-Isoquinolinone                                                                                                                                         | C9 H7 N O              | 5.355  |
| Nonanedioic acid                                                                                                                                             | C9 H16 O4              | 5.845  |
| 9,10,13-trihydroxy-11-octadecenoic acid                                                                                                                      | C18 H34 O5             | 7.424  |
| Hexadecanedioic acid                                                                                                                                         | C16 H30 O4             | 7.544  |
| 10,16-Dihydroxyhexadecanoic acid                                                                                                                             | C16 H32 O4             | 7.686  |
| dihexyl (E)-but-2-enedioate                                                                                                                                  | C16 H28 O4             | 7.732  |
| [(2S,3R,4S,5S,6R)-2-[5,7-dihydroxy-2-(4-hydroxyphenyl)-4-oxochromen-8-yl]-4,5-dihydroxy-6-(hydroxymethyl)oxan-3-yl] (E)-3-(4-hydroxyphenyl)prop-2-enoate     | C30 H26 O12            | 7.801  |
| Hexadecanedioic acid                                                                                                                                         | C16 H30 O4             | 7.927  |
| (3-hydroxy-9-methyldecyl) 4-hydroxybenzoate                                                                                                                  | C18 H28 O4             | 8.2    |
| dipentyl benzene-1,2-dicarboxylate                                                                                                                           | C18 H26 O4             | 8.644  |
| exo-1,7,7-Trimethylbicyclo(2.2.1)hept-2-yl acrylate                                                                                                          | C13 H20 O2             | 8.758  |
| 8-Hydroxyluteolin 4'-methyl ether 7- (6'''-acetylallosyl) (1->2) (6''-acetylglucoside)                                                                       | C32 H36 O19            | 9.18   |
| Unknown                                                                                                                                                      | C30 H32 Cl F N10 O7 P2 | 9.18   |
| Unknown                                                                                                                                                      | C36 H34 F2 O18         | 9.18   |
| 6-Hydroxyluteolin 6-glucoside-7- [ 6'''- (3-hydroxy-3-methylglutaryl) glucoside ]                                                                            | C33 H38 O21            | 9.182  |
| (9Z)-(13S)-12,13-Epoxyoctadeca-9,11-dienoic acid                                                                                                             | C18 H30 O3             | 10.004 |
| (9S,10S)-9,10-Dihydroxyoctadecanoate                                                                                                                         | C18 H36 O4             | 10.021 |
| (9Z)-(13S)-12,13-Epoxyoctadeca-9,11-dienoic acid                                                                                                             | C18 H30 O3             | 10.083 |
| 13S-hydroperoxy-9Z,11E,14Z-octadecatrienoic acid                                                                                                             | C18 H30 O4             | 10.267 |
| (6R,10R,11S,13S,17R)-6,11,17-trihydroxy-17-(2-hydroxyacetyl)-10,13-dimethyl-2,6,7,8,9,11,12,14,15,16-decahydro-1H-cyclopenta[a]phenanthren-3-one             | C21 H30 O6             | 10.272 |
| (9Z,15Z)-(13S)-12,13-Epoxyoctadeca-9,11,15-trienoic acid                                                                                                     | C18 H28 O3             | 10.279 |
| (8S,9S,10R,11S,13S,14S,17R)-17-[(1S)-1,2-dihydroxyethyl]-11,17-dihydroxy-10,13-dimethyl-2,6,7,8,9,11,12,14,15,16-decahydro-1H-cyclopenta[a]phenanthren-3-one | C21 H32 O5             | 10.581 |
| 12R,13S-epoxy-9Z-octadecenoic acid                                                                                                                           | C18 H32 O3             | 10.583 |
| (2E)-3-(3,4-Dihydroxyphenyl)prop-2-enoic acid                                                                                                                | C18 H32 O4 Si3         | 10.584 |
| (9Z)-(13S)-12,13-Epoxyoctadeca-9,11-dienoic acid                                                                                                             | C18 H30 O3             | 10.812 |
| (7S,8S,9Z,12Z)-7,8-dihydroxyoctadeca-9,12-dienoic acid                                                                                                       | C18 H32 O4             | 10.814 |
| Unknown                                                                                                                                                      | C12 H24 N6 O10         | 10.817 |
| (9Z)-(13S)-12,13-Epoxyoctadeca-9,11-dienoic acid                                                                                                             | C18 H30 O3             | 10.921 |
| (9Z)-(13S)-12,13-Epoxyoctadeca-9,11-dienoic acid                                                                                                             | C18 H30 O3             | 11.053 |
| 2-Oxoctadecanoic acid                                                                                                                                        | C18 H34 O3             | 11.151 |
| 12R,13S-epoxy-9Z-octadecenoic acid                                                                                                                           | C18 H32 O3             | 11.436 |
| (8S,10S,13S,14S,17S)-17-acetyl-10,13-dimethyl-1,2,6,7,8,12,14,15,16,17-decahydrocyclopenta[a]phenanthren-3-one                                               | C21 H28 O2             | 11.46  |
| Unknown                                                                                                                                                      | C14 H25 F3 O8          | 12.415 |
| Unknown                                                                                                                                                      | C6 H4 Fe S             | 13.08  |
| Unknown                                                                                                                                                      | C17 H26 F2 O7          | 13.082 |
| Unknown                                                                                                                                                      | C6 H4 Fe S             | 13.746 |
| Unknown                                                                                                                                                      | C15 H26 F2 O7          | 13.75  |

**(c) ethanol extract.**

| Compound Name                           | Formula             | RT [min] |
|-----------------------------------------|---------------------|----------|
| (2R,3S,4S,5R)-hexane-1,2,3,4,5,6-hexol  | C6 H14 O6           | 0.597    |
| Unknown                                 | C4 H6 N O P3 S      | 0.662    |
| Unknown                                 | C5 H F4 N2 O2 P3 S2 | 0.668    |
| Unknown                                 | C3 H N3 O6 P2       | 0.671    |
| Tetrachloro(hydrido)iron                | H Cl4 Fe            | 1.464    |
| 1(2H)-Isoquinolinone                    | C9 H7 N O           | 5.413    |
| 9,10,13-trihydroxy-11-octadecenoic acid | C18 H34 O5          | 7.418    |
| Hexadecanedioic acid                    | C16 H30 O4          | 7.543    |
| 10,16-Dihydroxyhexadecanoic acid        | C16 H32 O4          | 7.685    |

|                                                                                                                                                              |                  |        |
|--------------------------------------------------------------------------------------------------------------------------------------------------------------|------------------|--------|
| [(2S,3R,4S,5S,6R)-2-[5,7-dihydroxy-2-(4-hydroxyphenyl)-4-oxochromen-8-yl]-4,5-dihydroxy-6-(hydroxymethyl)oxan-3-yl] (E)-3-(4-hydroxyphenyl)prop-2-enoate     | C30 H26 O12      | 7.8    |
| Unknown                                                                                                                                                      | C30 H27 F O15    | 7.8    |
| [(2S,3R,4S,5S,6R)-2-[5,7-dihydroxy-2-(4-hydroxyphenyl)-4-oxochromen-8-yl]-4,5-dihydroxy-6-(hydroxymethyl)oxan-3-yl] (E)-3-(4-hydroxyphenyl)prop-2-enoate     | C30 H26 O12      | 7.889  |
| Hexadecanedioic acid                                                                                                                                         | C16 H30 O4       | 7.924  |
| (3-hydroxy-9-methyldecyl) 4-hydroxybenzoate                                                                                                                  | C18 H28 O4       | 8.198  |
| dipentyl benzene-1,2-dicarboxylate                                                                                                                           | C18 H26 O4       | 8.642  |
| exo-1,7,7-Trimethylbicyclo(2.2.1)hept-2-yl acrylate                                                                                                          | C13 H20 O2       | 8.755  |
| 8-Hydroxyluteolin 4'-methyl ether 7- (6'''-acetylallosyl) (1->2) (6''-acetylglucoside)                                                                       | C32 H36 O19      | 9.179  |
| Unknown                                                                                                                                                      | C46 H27 Cl F6 O2 | 9.181  |
| (9Z)-(13S)-12,13-Epoxyoctadeca-9,11-dienoic acid                                                                                                             | C18 H30 O3       | 10.008 |
| (9Z)-(13S)-12,13-Epoxyoctadeca-9,11-dienoic acid                                                                                                             | C18 H30 O3       | 10.075 |
| 13S-hydroperoxy-9Z,11E,14Z-octadecatrienoic acid                                                                                                             | C18 H30 O4       | 10.265 |
| (6R,10R,11S,13S,17R)-6,11,17-trihydroxy-17-(2-hydroxyacetyl)-10,13-dimethyl-2,6,7,8,9,11,12,14,15,16-decahydro-1H-cyclopenta[a]phenanthren-3-one             | C21 H30 O6       | 10.266 |
| (9Z,15Z)-(13S)-12,13-Epoxyoctadeca-9,11,15-trienoic acid                                                                                                     | C18 H28 O3       | 10.277 |
| 12R,13S-epoxy-9Z-octadecenoic acid                                                                                                                           | C18 H32 O3       | 10.578 |
| (2E)-3-(3,4-Dihydroxyphenyl)prop-2-enoic acid                                                                                                                | C18 H32 O4 Si3   | 10.58  |
| (8S,9S,10R,11S,13S,14S,17R)-17-[(1S)-1,2-dihydroxyethyl]-11,17-dihydroxy-10,13-dimethyl-2,6,7,8,9,11,12,14,15,16-decahydro-1H-cyclopenta[a]phenanthren-3-one | C21 H32 O5       | 10.581 |
| (9Z)-(13S)-12,13-Epoxyoctadeca-9,11-dienoic acid                                                                                                             | C18 H30 O3       | 10.809 |
| Unknown                                                                                                                                                      | C16 H28 O12      | 10.809 |
| (7S,8S,9Z,12Z)-7,8-dihydroxyoctadeca-9,12-dienoic acid                                                                                                       | C18 H32 O4       | 10.811 |
| (9Z)-(13S)-12,13-Epoxyoctadeca-9,11-dienoic acid                                                                                                             | C18 H30 O3       | 11.049 |
| 2-Oxoctadecanoic acid                                                                                                                                        | C18 H34 O3       | 11.153 |
| 12R,13S-epoxy-9Z-octadecenoic acid                                                                                                                           | C18 H32 O3       | 11.35  |
| 12,13-dihydroxy-9Z-octadecenoic acid                                                                                                                         | C18 H34 O4       | 11.425 |
| 12R,13S-epoxy-9Z-octadecenoic acid                                                                                                                           | C18 H32 O3       | 11.432 |
| (8S,10S,13S,14S,17S)-17-acetyl-10,13-dimethyl-1,2,6,7,8,12,14,15,16,17-decahydrocyclopenta[a]phenanthren-3-one                                               | C21 H28 O2       | 11.455 |
| Unknown                                                                                                                                                      | C14 H25 F3 O8    | 12.405 |
| Unknown                                                                                                                                                      | C17 H26 F2 O7    | 13.069 |
| (9Z),(11E)-octadecadienoic acid                                                                                                                              | C18 H32 O2       | 13.07  |
| Unknown                                                                                                                                                      | C6 H4 Fe S       | 13.739 |
| Unknown                                                                                                                                                      | C15 H26 F2 O7    | 13.742 |

**(d) ethyl acetate extract.**

| Compound Name                                                                                                                                            | Formula             | RT [min] |
|----------------------------------------------------------------------------------------------------------------------------------------------------------|---------------------|----------|
| (2R,3S,4S,5R)-hexane-1,2,3,4,5,6-hexol                                                                                                                   | C6 H14 O6           | 0.591    |
| Unknown                                                                                                                                                  | C2 H N3 O5 P2       | 0.657    |
| Unknown                                                                                                                                                  | C3 H4 N2 O8 P2 S3   | 0.66     |
| Unknown                                                                                                                                                  | C5 H6 N O2 P3 S     | 0.665    |
| 9,10,13-trihydroxy-11-octadecenoic acid                                                                                                                  | C18 H34 O5          | 7.407    |
| Unknown                                                                                                                                                  | C18 H25 F3 N4       | 7.527    |
| Hexadecanedioic acid                                                                                                                                     | C16 H30 O4          | 7.527    |
| 10,16-Dihydroxyhexadecanoic acid                                                                                                                         | C16 H32 O4          | 7.668    |
| dihexyl (E)-but-2-enedioate                                                                                                                              | C16 H28 O4          | 7.713    |
| [(2S,3R,4S,5S,6R)-2-[5,7-dihydroxy-2-(4-hydroxyphenyl)-4-oxochromen-8-yl]-4,5-dihydroxy-6-(hydroxymethyl)oxan-3-yl] (E)-3-(4-hydroxyphenyl)prop-2-enoate | C30 H26 O12         | 7.781    |
| Unknown                                                                                                                                                  | C34 H22 Cl F3 N2 O4 | 7.781    |
| Unknown                                                                                                                                                  | C25 H32 N2 O14 P2   | 7.785    |
| [(2S,3R,4S,5S,6R)-2-[5,7-dihydroxy-2-(4-hydroxyphenyl)-4-oxochromen-8-yl]-4,5-dihydroxy-6-(hydroxymethyl)oxan-3-yl] (E)-3-(4-hydroxyphenyl)prop-2-enoate | C30 H26 O12         | 7.872    |

|                                                                                                                                                              |                        |        |
|--------------------------------------------------------------------------------------------------------------------------------------------------------------|------------------------|--------|
| Hexadecanedioic acid                                                                                                                                         | C16 H30 O4             | 7.907  |
| (3-hydroxy-9-methyldecyl) 4-hydroxybenzoate                                                                                                                  | C18 H28 O4             | 8.184  |
| dipentyl benzene-1,2-dicarboxylate                                                                                                                           | C18 H26 O4             | 8.622  |
| exo-1,7,7-Trimethylbicyclo(2.2.1)hept-2-yl acrylate                                                                                                          | C13 H20 O2             | 8.733  |
| 8-Hydroxyluteolin 4'-methyl ether 7- (6'''-acetylallosyl) (1->2) (6''-acetylglucoside)                                                                       | C32 H36 O19            | 9.158  |
| Unknown                                                                                                                                                      | C41 H32 F2 N4 O7<br>P2 | 9.159  |
| Unknown                                                                                                                                                      | C46 H27 Cl F6 O2       | 9.16   |
| 6-Hydroxyluteolin 6-glucoside-7- [ 6'''- (3-hydroxy-3-methylglutaryl) glucoside ]                                                                            | C33 H38 O21            | 9.162  |
| 6Z,9Z,12Z,15Z-octadecatetraenoic acid                                                                                                                        | C18 H28 O2             | 9.977  |
| 11β,17,20R,21-tetrahydroxy-pregna-1,4-dien-3-one                                                                                                             | C21 H30 O5             | 9.988  |
| (9Z)-(13S)-12,13-Epoxyoctadeca-9,11-dienoic acid                                                                                                             | C18 H30 O3             | 9.992  |
| (9S,10S)-9,10-Dihydroxyoctadecanoate                                                                                                                         | C18 H36 O4             | 10.001 |
| (9Z)-(13S)-12,13-Epoxyoctadeca-9,11-dienoic acid                                                                                                             | C18 H30 O3             | 10.068 |
| 11β,17,20R,21-tetrahydroxy-pregna-1,4-dien-3-one                                                                                                             | C21 H30 O5             | 10.072 |
| 13S-hydroperoxy-9Z,11E,14Z-octadecatrienoic acid                                                                                                             | C18 H30 O4             | 10.249 |
| (6R,10R,11S,13S,17R)-6,11,17-trihydroxy-17-(2-hydroxyacetyl)-10,13-dimethyl-2,6,7,8,9,11,12,14,15,16-decahydro-1H-cyclopenta[a]phenanthren-3-one             | C21 H30 O6             | 10.252 |
| (9Z,15Z)-(13S)-12,13-Epoxyoctadeca-9,11,15-trienoic acid                                                                                                     | C18 H28 O3             | 10.261 |
| Unknown                                                                                                                                                      | C15 H21 F3 N4 O6       | 10.264 |
| Unknown                                                                                                                                                      | C31 H51 F N8           | 10.555 |
| (8S,9S,10R,11S,13S,14S,17R)-17-[(1S)-1,2-dihydroxyethyl]-11,17-dihydroxy-10,13-dimethyl-2,6,7,8,9,11,12,14,15,16-decahydro-1H-cyclopenta[a]phenanthren-3-one | C21 H32 O5             | 10.556 |
| 12R,13S-epoxy-9Z-octadecenoic acid                                                                                                                           | C18 H32 O3             | 10.557 |
| (2E)-3-(3,4-Dihydroxyphenyl)prop-2-enoic acid                                                                                                                | C18 H32 O4 Si3         | 10.562 |
| Unknown                                                                                                                                                      | C42 H62 O S            | 10.563 |
| (9Z)-(13S)-12,13-Epoxyoctadeca-9,11-dienoic acid                                                                                                             | C18 H30 O3             | 10.741 |
| (7S,8S,9Z,12Z)-7,8-dihydroxyoctadeca-9,12-dienoic acid                                                                                                       | C18 H32 O4             | 10.742 |
| 1-Cyclohexyl-3-[3-(1H-imidazol-1-yl)propyl]thiourea                                                                                                          | C13 H22 N4 S           | 10.787 |
| (9Z)-(13S)-12,13-Epoxyoctadeca-9,11-dienoic acid                                                                                                             | C18 H30 O3             | 10.788 |
| Unknown                                                                                                                                                      | C35 H62 F3 N2 O3<br>P  | 10.788 |
| Unknown                                                                                                                                                      | C16 H28 O12            | 10.789 |
| (7S,8S,9Z,12Z)-7,8-dihydroxyoctadeca-9,12-dienoic acid                                                                                                       | C18 H32 O4             | 10.795 |
| (9Z)-(13S)-12,13-Epoxyoctadeca-9,11-dienoic acid                                                                                                             | C18 H30 O3             | 11.03  |
| (9Z)-(13S)-12,13-Epoxyoctadeca-9,11-dienoic acid                                                                                                             | C18 H30 O3             | 11.088 |
| 2-Oxoctadecanoic acid                                                                                                                                        | C18 H34 O3             | 11.142 |
| 12,13-dihydroxy-9Z-octadecenoic acid                                                                                                                         | C18 H34 O4             | 11.329 |
| 12R,13S-epoxy-9Z-octadecenoic acid                                                                                                                           | C18 H32 O3             | 11.332 |
| 12R,13S-epoxy-9Z-octadecenoic acid                                                                                                                           | C18 H32 O3             | 11.407 |
| 12,13-dihydroxy-9Z-octadecenoic acid                                                                                                                         | C18 H34 O4             | 11.412 |
| Unknown                                                                                                                                                      | C21 H34 O6             | 11.413 |
| (8S,10S,13S,14S,17S)-17-acetyl-10,13-dimethyl-1,2,6,7,8,12,14,15,16,17-decahydrocyclopenta[a]phenanthren-3-one                                               | C21 H28 O2             | 11.439 |
| Unknown                                                                                                                                                      | C14 H25 F3 O8          | 12.382 |
| 9Z-Octadecen-12-ynoic acid                                                                                                                                   | C18 H30 O2             | 12.383 |
| (2Z,4E)-5-[(1S,4S,6R)-4-Hydroxy-2,2,6-trimethyl-7-oxabicyclo[4.1.0]heptan-1-yl]-3-methylpenta-2,4-dienal                                                     | C15 H22 O3             | 12.952 |
| 9Z,11E-octadecadienoic acid                                                                                                                                  | C18 H32 O2             | 13.045 |
| Unknown                                                                                                                                                      | C14 H27 F3 O8          | 13.05  |
| Unknown                                                                                                                                                      | C6 H4 Fe S             | 13.052 |
| 2,2'-Methylenebis(6-tert-butyl-4-ethylphenol)                                                                                                                | C25 H36 O2             | 13.19  |
| Unknown                                                                                                                                                      | C34 H37 N6 O2 P        | 13.396 |
| Unknown                                                                                                                                                      | C15 H26 F2 O7          | 13.711 |

|         |            |        |
|---------|------------|--------|
| Unknown | C6 H4 Fe S | 13.719 |
|---------|------------|--------|

**(e)** methanol extract.

| Compound Name                                                                                                                                                | Formula            | RT [min] |
|--------------------------------------------------------------------------------------------------------------------------------------------------------------|--------------------|----------|
| (2R,3S,4S,5R)-hexane-1,2,3,4,5,6-hexol                                                                                                                       | C6 H14 O6          | 0.598    |
| Unknown                                                                                                                                                      | C2 H N3 O5 P2      | 0.66     |
| Unknown                                                                                                                                                      | C3 H4 N2 O8 P2 S3  | 0.667    |
| Unknown                                                                                                                                                      | C3 H N3 O6 P2      | 0.669    |
| Tetrachloro(hydrido)iron                                                                                                                                     | H Cl4 Fe           | 1.469    |
| 1(2H)-Isoquinolinone                                                                                                                                         | C9 H7 N O          | 5.351    |
| 9,10,13-trihydroxy-11-octadecenoic acid                                                                                                                      | C18 H34 O5         | 7.416    |
| Hexadecanedioic acid                                                                                                                                         | C16 H30 O4         | 7.541    |
| 10,16-Dihydroxyhexadecanoic acid                                                                                                                             | C16 H32 O4         | 7.681    |
| [(2S,3R,4S,5S,6R)-2-[5,7-dihydroxy-2-(4-hydroxyphenyl)-4-oxochromen-8-yl]-4,5-dihydroxy-6-(hydroxymethyl)oxan-3-yl] (E)-3-(4-hydroxyphenyl)prop-2-enoate     | C30 H26 O12        | 7.799    |
| Hexadecanedioic acid                                                                                                                                         | C16 H30 O4         | 7.922    |
| (3-hydroxy-9-methyldecyl) 4-hydroxybenzoate                                                                                                                  | C18 H28 O4         | 8.196    |
| dipentyl benzene-1,2-dicarboxylate                                                                                                                           | C18 H26 O4         | 8.638    |
| exo-1,7,7-Trimethylbicyclo(2.2.1)hept-2-yl acrylate                                                                                                          | C13 H20 O2         | 8.752    |
| 8-Hydroxyluteolin 4'-methyl ether 7- (6'''-acetylallosyl) (1->2) (6''-acetylglucoside)                                                                       | C32 H36 O19        | 9.172    |
| Unknown                                                                                                                                                      | C46 H26 F5 N4 O2 P | 9.173    |
| 6Z,9Z,12Z,15Z-octadecatetraenoic acid                                                                                                                        | C18 H28 O2         | 9.995    |
| 11β,17,20R,21-tetrahydroxy-pregna-1,4-dien-3-one                                                                                                             | C21 H30 O5         | 9.999    |
| (9Z)-(13S)-12,13-Epoxyoctadeca-9,11-dienoic acid                                                                                                             | C18 H30 O3         | 10.003   |
| (9S,10S)-9,10-Dihydroxyoctadecanoate                                                                                                                         | C18 H36 O4         | 10.013   |
| (9Z)-(13S)-12,13-Epoxyoctadeca-9,11-dienoic acid                                                                                                             | C18 H30 O3         | 10.084   |
| 13S-hydroperoxy-9Z,11E,14Z-octadecatrienoic acid                                                                                                             | C18 H30 O4         | 10.262   |
| (6R,10R,11S,13S,17R)-6,11,17-trihydroxy-17-(2-hydroxyacetyl)-10,13-dimethyl-2,6,7,8,9,11,12,14,15,16-decahydro-1H-cyclopenta[a]phenanthren-3-one             | C21 H30 O6         | 10.265   |
| (9Z,15Z)-(13S)-12,13-Epoxyoctadeca-9,11,15-trienoic acid                                                                                                     | C18 H28 O3         | 10.274   |
| (8S,9S,10R,11S,13S,14S,17R)-17-[(1S)-1,2-dihydroxyethyl]-11,17-dihydroxy-10,13-dimethyl-2,6,7,8,9,11,12,14,15,16-decahydro-1H-cyclopenta[a]phenanthren-3-one | C21 H32 O5         | 10.572   |
| 12R,13S-epoxy-9Z-octadecenoic acid                                                                                                                           | C18 H32 O3         | 10.576   |
| (2E)-3-(3,4-Dihydroxyphenyl)prop-2-enoic acid                                                                                                                | C18 H32 O4 Si3     | 10.577   |
| Unknown                                                                                                                                                      | C38 H62 O6         | 10.578   |
| (7S,8S,9Z,12Z)-7,8-dihydroxyoctadeca-9,12-dienoic acid                                                                                                       | C18 H32 O4         | 10.804   |
| Unknown                                                                                                                                                      | C16 H28 O12        | 10.804   |
| (9Z)-(13S)-12,13-Epoxyoctadeca-9,11-dienoic acid                                                                                                             | C18 H30 O3         | 10.805   |
| (9Z)-(13S)-12,13-Epoxyoctadeca-9,11-dienoic acid                                                                                                             | C18 H30 O3         | 10.917   |
| (9Z)-(13S)-12,13-Epoxyoctadeca-9,11-dienoic acid                                                                                                             | C18 H30 O3         | 11.047   |
| 2-Oxoctadecanoic acid                                                                                                                                        | C18 H34 O3         | 11.149   |
| 12R,13S-epoxy-9Z-octadecenoic acid                                                                                                                           | C18 H32 O3         | 11.431   |
| (8S,10S,13S,14S,17S)-17-acetyl-10,13-dimethyl-1,2,6,7,8,12,14,15,16,17-decahydrocyclopenta[a]phenanthren-3-one                                               | C21 H28 O2         | 11.455   |
| 9Z-Octadecen-12-ynoic acid                                                                                                                                   | C18 H30 O2         | 12.406   |
| Unknown                                                                                                                                                      | C17 H24 F2 O7      | 12.406   |
| Unknown                                                                                                                                                      | C17 H26 F2 O7      | 13.071   |
| Unknown                                                                                                                                                      | C6 H4 Fe S         | 13.071   |
| 2,2'-Methylenebis(6-tert-butyl-4-ethylphenol)                                                                                                                | C25 H36 O2         | 13.207   |
| Unknown                                                                                                                                                      | C6 H4 Fe S         | 13.739   |
| Unknown                                                                                                                                                      | C15 H26 F2 O7      | 13.741   |

**Table S4.** Common and unique compounds identified in different *E. foeminea* crude extracts via Venn diagram analysis using negative ion mode LC–MS.

| Occurrence                   | Total | Compound Name                                                                                                                                                                                                                                                                                                                                                                                                                                                                                                                                                                                                                                                                                                                                                                                                                                                                                                                                                                                                                                                                                                                                               |
|------------------------------|-------|-------------------------------------------------------------------------------------------------------------------------------------------------------------------------------------------------------------------------------------------------------------------------------------------------------------------------------------------------------------------------------------------------------------------------------------------------------------------------------------------------------------------------------------------------------------------------------------------------------------------------------------------------------------------------------------------------------------------------------------------------------------------------------------------------------------------------------------------------------------------------------------------------------------------------------------------------------------------------------------------------------------------------------------------------------------------------------------------------------------------------------------------------------------|
| ACE DCM/MeOH EA<br>EtOH MeOH | 15    | 2-Oxo-octadecanoic Acid<br><br>(7S,8S,9Z,12Z)-7,8-dihydroxyoctadeca-9,12-dienoic acid<br>(8S,10S,13S,14S,17S)-17-Acetyl-10,13-dimethyl-1,2,6,7,8,12,14,15,16,17-decahydrocyclopenta[a]phenanthren-3-one<br>8-Hydroxyluteolin 4'-Methyl Ether 7- (6'''-Acetylallosyl) (1->2) (6''-Acetylglucoside)<br>(2E)-3-(3,4-Dihydroxyphenyl)Prop-2-Enoic Acid<br>Dipentyl Benzene-1,2-Dicarboxylate<br>C <sub>6</sub> H <sub>4</sub> Fe S<br>(3-Hydroxy-9-Methyldecyl) 4-Hydroxybenzoate<br>C <sub>15</sub> H <sub>26</sub> F <sub>2</sub> O <sub>6</sub><br>(8S,9S,10R,11S,13S,14S,17R)-17-[(1S)-1,2-Dihydroxyethyl]-11,17-Dihydroxy-10,13-Dimethyl-2,6,7,8,9,11,12,14,15,16-Decahydro-1H-Cyclopenta[a]phenanthren-3-one<br>Exo-1,7,7-Trimethylbicyclo(2.2.1)Hept-2-yl Acrylate<br>[(2S,3R,4S,5S,6R)-2-[5,7-dihydroxy-2-(4-hydroxyphenyl)-4-oxochromen-8-yl]-4,5-dihydroxy-6-(hydroxymethyl)oxan-3-yl] (E)-3-(4-hydroxyphenyl)prop-2-enoate<br>(2R,3R,4R,5R)-hexane-1,2,3,4,5,6-hexol<br>Hexadecanedioic Acid<br>(6R,8S,10R,11S,13S,17R)-6,11,17-trihydroxy-17-(2-hydroxyacetyl)-10,13-dimethyl-2,6,7,8,9,11,12,14,15,16-decahydro-1H-cyclopenta[a]phenanthren-3-one. |
| ACE DCM/MeOH EtOH<br>MeOH    | 2     | C <sub>3</sub> H N <sub>3</sub> O <sub>6</sub> P <sub>1</sub><br><br>C <sub>17</sub> H <sub>26</sub> F <sub>2</sub> O <sub>6</sub>                                                                                                                                                                                                                                                                                                                                                                                                                                                                                                                                                                                                                                                                                                                                                                                                                                                                                                                                                                                                                          |
| ACE DCM/MeOH EA<br>MeOH      | 6     | 13S-hydroperoxy-9Z,11E,14Z-octadecatrienoic acid<br><br>(9Z,13S)-12,13-epoxyoctadeca-9,11-dienoic acid<br>10,16-Dihydroxyhexadecanoic Acid<br>C <sub>3</sub> H <sub>4</sub> N <sub>2</sub> O <sub>8</sub> P <sub>2</sub> S <sub>2</sub><br>(9S,10S)-9,10-Dihydroxyoctadecanoate<br>12(R),13(S)-Epoxy-9(Z)-octadecenoic acid                                                                                                                                                                                                                                                                                                                                                                                                                                                                                                                                                                                                                                                                                                                                                                                                                                 |
| DCM/MeOH EtOH<br>MeOH        | 2     | 1(2H)-Isoquinolinone<br><br>Tetrachloro(Hydrido)Iron                                                                                                                                                                                                                                                                                                                                                                                                                                                                                                                                                                                                                                                                                                                                                                                                                                                                                                                                                                                                                                                                                                        |
| ACE DCM/MeOH EA              | 5     | C <sub>14</sub> H <sub>25</sub> F <sub>3</sub> O <sub>7</sub><br>(9Z,15Z)-(13S)-12,13-Epoxyoctadeca-9,11,15-Trienoic Acid<br>6-Hydroxyluteolin 6-Glucoside-7- [ 6'''- (3-Hydroxy-3-Methylglutaryl) Glucoside<br>9,10,13-Trihydroxy-11-Octadecenoic Acid<br>Dihexyl (E)-But-2-Enedioate                                                                                                                                                                                                                                                                                                                                                                                                                                                                                                                                                                                                                                                                                                                                                                                                                                                                      |
| ACE EA MeOH                  | 2     | 11i',17,20r,21-Tetrahydroxy-Pregna-1,4-Dien-3-one<br>C <sub>2</sub> H N <sub>3</sub> O <sub>5</sub> P <sub>1</sub>                                                                                                                                                                                                                                                                                                                                                                                                                                                                                                                                                                                                                                                                                                                                                                                                                                                                                                                                                                                                                                          |
| ACE EA EtOH                  | 1     | 12,13-Dihydroxy-9Z-Octadecenoic Acid                                                                                                                                                                                                                                                                                                                                                                                                                                                                                                                                                                                                                                                                                                                                                                                                                                                                                                                                                                                                                                                                                                                        |
| EA MeOH                      | 4     | 6Z,9Z,12Z,15Z-Octadecatetraenoic Acid<br>9Z-Octadecen-12-Ynoic Acid<br>C <sub>16</sub> H <sub>28</sub> O <sub>11</sub><br>2,2'-Methylenebis(6-Tert-Butyl-4-Ethylphenol)                                                                                                                                                                                                                                                                                                                                                                                                                                                                                                                                                                                                                                                                                                                                                                                                                                                                                                                                                                                     |
| ACE EA                       | 1     | 9Z,11E-Octadecadienoic Acid                                                                                                                                                                                                                                                                                                                                                                                                                                                                                                                                                                                                                                                                                                                                                                                                                                                                                                                                                                                                                                                                                                                                 |
| DCM/MeOH                     | 4     | Nonanedioic Acid                                                                                                                                                                                                                                                                                                                                                                                                                                                                                                                                                                                                                                                                                                                                                                                                                                                                                                                                                                                                                                                                                                                                            |

|      |    |                                                                                                                                                                                                                                                                                                                                                                                                                                                               |
|------|----|---------------------------------------------------------------------------------------------------------------------------------------------------------------------------------------------------------------------------------------------------------------------------------------------------------------------------------------------------------------------------------------------------------------------------------------------------------------|
|      |    | C36 H34 F2 O17<br>C12 H24 N6 O9<br>C30 H32 Cl F N10 O7 P1                                                                                                                                                                                                                                                                                                                                                                                                     |
| MeOH | 6  | C46 H26 F5 N4 O2 P<br>(9Z)-(13S)-12,13-Epoxyoctadeca-9,11-Dienoic Acid<br>9,10,13-Trihydroxy-11-Octadecenoic Acid<br>(9Z,15Z)-(13S)-12,13-Epoxyoctadeca-9,11,15-Trienoic Acid<br>C38 H62 O5<br>C17 H24 F2 O6                                                                                                                                                                                                                                                  |
| EtOH | 14 | C4 H6 N O P3 S<br>C14 H25 F3 O8<br>12(R),13(S)-Epoxy-9(Z)-octadecenoic acid<br>C30 H27 F O15<br>Hexadecanedioicacid<br>(9Z,15Z)-(13S)-12,13-Epoxyoctadeca-9,11,15-Trienoicacid<br>(9Z),(11E)-Octadecadienoicacid<br>(9Z)-(13S)-12,13-Epoxyoctadeca-9,11-Dienoicacid<br>C5 H F4 N2 O2 P3 S1<br>13S-Hydroperoxy-9Z,11E,14z-Octadecatrienoicacid<br>10,16-Dihydroxyhexadecanoicacid<br>9,10,13-Trihydroxy-11-Octadecenoicacid<br>C46 H27 Cl F6 O2<br>C16 H28 O12 |
| EA   | 15 | C42 H62 O S<br>C35 H62 F3 N2 O3 P<br>1-Cyclohexyl-3-[3-(1h-Imidazol-1-yl)Propyl]Thiourea<br>(2Z,4E)-5-[(1S,4S,6R)-4-hydroxy-2,2,6-trimethyl-7-oxabicyclo[4.1.0]hept-1-yl]-3-methylpenta-2,4-dienal<br>C41 H32 F2 N4 O7 P1<br>C15 H21 F3 N4 O5<br>C5 H6 N O2 P3 S<br>C46 H27 Cl F6 O1<br>C31 H51 F N7<br>C34 H22 Cl F3 N2 O3<br>C25 H32 N2 O14 P1<br>C34 H37 N6 O2 P<br>C18 H25 F3 N3<br>C14 H27 F3 O7<br>C21 H34 O5                                           |
| ACE  | 6  | C35 H63 F O8<br>C14 H25 F3 O9<br>C29 H29 Cl N10 O12<br>C36 H27 N2 O6 P S<br>C17 H26 F2 O8<br>C42 H31 F6 O7 P                                                                                                                                                                                                                                                                                                                                                  |

**Table S5.** Identified metabolites in *E. foeminea* crude extracts analyzed by GC–MS. **(a)** acetone.

| Compound Name | RT(min) |
|---------------|---------|
|---------------|---------|

| Boric Acid                                                  | 8.190467 |
|-------------------------------------------------------------|----------|
| 1,2-Xylene                                                  | 8.374233 |
| Pyridine                                                    | 8.4141   |
| Pyridine                                                    | 8.418533 |
| Pyridine                                                    | 8.859117 |
| O-Methylhydroxylamine                                       | 8.960967 |
| O-Methylhydroxylamine                                       | 8.9632   |
| Propan-1-amine                                              | 9.19345  |
| 1H-pyridin-2-one                                            | 9.556583 |
| 2-Hydroxypropanoic acid                                     | 10.15885 |
| 2-Hydroxypropanoic acid                                     | 10.16107 |
| Hydroxyacetic acid                                          | 10.25185 |
| Hydroxyacetic acid                                          | 10.6039  |
| 2-Methylpropan-1-amine                                      | 11.11098 |
| 1-Butyl-ethylhydrazine                                      | 11.9768  |
| Oxalic Acid                                                 | 12.03657 |
| 1,3-diazinane-2,4-dione                                     | 12.30452 |
| Pyrrolidin-2-one                                            | 12.39528 |
| 3-Hydroxypropionic Acid                                     | 12.43515 |
| (2S)-2-(methylamino)propanoic acid                          | 13.18135 |
| Benzoic Acid                                                | 15.0768  |
| Propane-1,2,3-triol                                         | 15.69238 |
| Propane-1,2,3-triol                                         | 15.69903 |
| (2S,3R)-butane-1,2,3-triol                                  | 16.08435 |
| 2-oxohexanoic acid                                          | 16.5826  |
| Butanedioic acid                                            | 16.6446  |
| Pentanedioic acid                                           | 18.49585 |
| (2R,3S)-Butane-1,2,3,4-tetrol                               | 20.73677 |
| (2R,3R)-Butane-1,2,3,4-tetrol                               | 20.90947 |
| 5-OxoProline                                                | 21.18407 |
| (2R,3S,4S)-Pentane-1,2,3,4,5-pentol                         | 25.1477  |
| (3R,4S,5R)-3,4,5-Trihydroxycyclohex-1-ene-1-carboxylic acid | 26.66452 |
| (3S,4R,5R)-1,3,4,5,6-Pentahydroxyhexan-2-one                | 27.74062 |
| (3S,4R,5S)-1,3,4,5,6-Pentahydroxyhexan-2-one                | 27.90448 |
| (2R,3S,4R,5R)-2,3,4,5,6-Pentahydroxyhexanal                 | 28.16353 |
| (3S,4S,5S,6R)-6-(hydroxymethyl)oxane-2,3,4,5-tetrol         | 28.16797 |
| (2R,3S,4S,5R)-Hexane-1,2,3,4,5,6-hexol                      | 28.84115 |
| (2S,3R,4R,5R)-Hexane-1,2,3,4,5,6-hexol                      | 28.84778 |
| Hexadecanoic acid                                           | 30.65027 |
| Hexadecanoic acid                                           | 30.66133 |
| Hexadecanoic acid                                           | 30.66577 |
| Hexadecanoic acid                                           | 30.67018 |
| (9Z,12Z)-Octadeca-9,12-dienoic acid                         | 33.16796 |
| (9Z,12Z)-Octadeca-9,12-dienoic acid                         | 33.17019 |
| (9Z,12Z,15Z)-Octadeca-9,12,15-trienoic acid                 | 33.25875 |
| Octadecanoic acid                                           | 33.64403 |
| Octadecanoic acid                                           | 33.64847 |
| <b>(b) dichloromethane/methanol extract.</b>                |          |
| Compound Name                                               | RT(min)  |
| Pyridine                                                    | 8.633533 |
| 1H-pyridin-2-one                                            | 9.604883 |
| 2-Hydroxypropanoic acid                                     | 9.963717 |
| Hydroxyacetic acid                                          | 10.4896  |

|                                                                                                                          |          |
|--------------------------------------------------------------------------------------------------------------------------|----------|
| 2-Methylpropan-1-amine                                                                                                   | 10.85463 |
| Oxalic Acid                                                                                                              | 11.88372 |
| 1,3-diazinane-2,4-dione                                                                                                  | 12.26318 |
| 3-Hydroxypropionic Acid                                                                                                  | 12.30442 |
| Pyrrolidin-2-one                                                                                                         | 12.67152 |
| Valine                                                                                                                   | 14.01618 |
| 2-Aminoethan-1-ol                                                                                                        | 15.21648 |
| Benzoic Acid                                                                                                             | 15.2433  |
| Propane-1,2,3-triol                                                                                                      | 15.33815 |
| Propane-1,2,3-triol                                                                                                      | 15.3464  |
| Aminoacetic acid                                                                                                         | 16.20847 |
| Butanedioic acid                                                                                                         | 16.59207 |
| 2,3-Dihydroxypropanoic acid                                                                                              | 16.71995 |
| 2-Hydroxybutanedioic acid                                                                                                | 20.23425 |
| (2R,3S)-Butane-1,2,3,4-tetrol                                                                                            | 20.26312 |
| (2R,3R)-Butane-1,2,3,4-tetrol                                                                                            | 20.41987 |
| (2R,3S)-Butane-1,2,3,4-tetrol                                                                                            | 20.42192 |
| 4-Aminobutanoic acid                                                                                                     | 21.17055 |
| 4-Aminobutanoic acid                                                                                                     | 21.17262 |
| 4-Aminobutanoic acid                                                                                                     | 21.18912 |
| 5-OxoProline                                                                                                             | 21.25717 |
| Xylose                                                                                                                   | 23.48662 |
| (2R,4R)-Pentane-1,2,3,4,5-pentol                                                                                         | 24.19607 |
| (2R,3s,4S)-Pentane-1,2,3,4,5-pentol                                                                                      | 24.19813 |
| (2R,4R)-Pentane-1,2,3,4,5-pentol                                                                                         | 24.2002  |
| (2R,3s,4S)-Pentane-1,2,3,4,5-pentol                                                                                      | 24.46212 |
| (2R,3R,4S)-Pentane-1,2,3,4,5-pentol                                                                                      | 24.54667 |
| (3R,4S,5R)-3,4,5-Trihydroxycyclohex-1-ene-1-carboxylic acid                                                              | 26.343   |
| 3,4-DihydroxyBenzoic Acid                                                                                                | 26.72248 |
| (3R,4R,5R)-2-(hydroxymethyl)oxane-2,3,4,5-tetrol                                                                         | 27.14115 |
| (3S,4R,5S)-1,3,4,5,6-Pentahydroxyhexan-2-one                                                                             | 27.1494  |
| (3R,4R,5R)-2-(hydroxymethyl)oxane-2,3,4,5-tetrol                                                                         | 27.15352 |
| (3S,4R,5S)-1,3,4,5,6-Pentahydroxyhexan-2-one                                                                             | 27.32057 |
| (3S,4R,5R)-1,3,4,5,6-Pentahydroxyhexan-2-one                                                                             | 27.32675 |
| (3S,4S,5S,6R)-6-(hydroxymethyl)oxane-2,3,4,5-tetrol                                                                      | 27.58867 |
| (3S,4S,5S,6R)-6-(hydroxymethyl)oxane-2,3,4,5-tetrol                                                                      | 27.6031  |
| (2R,3R,4S,5S,6R)-6-(hydroxymethyl)oxane-2,3,4,5-tetrol                                                                   | 27.9331  |
| (2R)-2-[(1S)-1,2-dihydroxyethyl]-3,4-dihydroxy-2H-furan-5-one                                                            | 28.14138 |
| (2S,3R,4S,5R,6R)-6-(hydroxymethyl)oxane-2,3,4,5-tetrol                                                                   | 28.14552 |
| (2R,3R,4R,5R)-Hexane-1,2,3,4,5,6-hexol                                                                                   | 28.1517  |
| (2R,3R,4R,5R)-Hexane-1,2,3,4,5,6-hexol                                                                                   | 28.19087 |
| (2R,3R,4R,5R)-Hexane-1,2,3,4,5,6-hexol                                                                                   | 28.19498 |
| (2R,3S,4S,5R)-Hexane-1,2,3,4,5,6-hexol                                                                                   | 28.1991  |
| (2R,3s,4S)-Pentane-1,2,3,4,5-pentol                                                                                      | 28.20323 |
| (2S,3R,4S,5R,6R)-2-[(2R,3S,4S,5R)-4,5-dihydroxy-2,5-bis(hydroxymethyl)oxolan-3-yl]oxy-6-(hydroxymethyl)oxane-3,4,5-triol | 30.03877 |
| Hexadecanoic acid                                                                                                        | 30.58942 |
| Tetradecanoic acid                                                                                                       | 30.5956  |
| (1R,2S,3r,4R,5S,6s)-Cyclohexane-1,2,3,4,5,6-hexol                                                                        | 30.73583 |
| (9Z,12Z)-Octadeca-9,12-dienoic acid                                                                                      | 33.1241  |
| (9Z)-Octadec-9-enoic acid                                                                                                | 33.1901  |
| (9Z,12Z,15Z)-Octadeca-9,12,15-trienoic acid                                                                              | 33.24373 |
| Octadecanoic acid                                                                                                        | 33.55927 |

|                    |          |
|--------------------|----------|
| Tetradecanoic acid | 33.56133 |
| Acetic acid        | 37.59743 |

**(c) ethanol extract.**

| Compound Name                                               | RT(min)  |
|-------------------------------------------------------------|----------|
| Boric Acid                                                  | 8.179383 |
| Pyridine                                                    | 8.400817 |
| Pyridine                                                    | 8.845866 |
| Propan-1-amine                                              | 9.186883 |
| 1H-pyridin-2-one                                            | 9.567717 |
| 2-Hydroxypropanoic acid                                     | 10.15008 |
| Hydroxyacetic acid                                          | 10.59735 |
| 2-Aminopropanoic acid                                       | 11.31922 |
| Butan-1-amine                                               | 11.4255  |
| Oxalic Acid                                                 | 12.03222 |
| Pyrrolidin-2-one                                            | 12.39093 |
| 3-Hydroxypropionic Acid                                     | 12.42857 |
| 1,3-diazinane-2,4-dione                                     | 12.51492 |
| 3-Hydroxybutanoic acid                                      | 12.84485 |
| Valine                                                      | 14.25537 |
| Valine                                                      | 14.27085 |
| 4-Hydroxybutanoic acid                                      | 14.77795 |
| Urea                                                        | 14.84882 |
| Benzoic Acid                                                | 15.0769  |
| 2-Aminoethan-1-ol                                           | 15.52642 |
| Propane-1,2,3-triol                                         | 15.66812 |
| Propane-1,2,3-triol                                         | 15.69248 |
| Propane-1,2,3-triol                                         | 15.70575 |
| (2S,3R)-butane-1,2,3-triol                                  | 16.08218 |
| Isoleucine                                                  | 16.15748 |
| Proline                                                     | 16.25712 |
| 2-oxohexanoic acid                                          | 16.58262 |
| Butanedioic acid                                            | 16.64462 |
| Nonanoic acid                                               | 17.75618 |
| 2,3-Bis(phosphonooxy)propanoic acid                         | 18.79242 |
| 2-Hydroxybutanedioic acid                                   | 20.4975  |
| (2R,3S)-Butane-1,2,3,4-tetrol                               | 20.7477  |
| (2R,3S)-Butane-1,2,3,4-tetrol                               | 20.91155 |
| 5-OxoProline                                                | 21.18392 |
| 4-Aminobutanoic acid                                        | 21.3943  |
| 4-Hydroxybenzoic Acid                                       | 23.35617 |
| Dodecanoic acid                                             | 23.84555 |
| (2R,3R,4S,5R)-5-(hydroxymethyl)oxolane-2,3,4-triol          | 23.97398 |
| (2R,4R)-Pentane-1,2,3,4,5-pentol                            | 24.6405  |
| ethenyl icosyl carbonate                                    | 24.82428 |
| (2R,3s,4S)-Pentane-1,2,3,4,5-pentol                         | 25.05457 |
| (3R,4S,5R)-3,4,5-Trihydroxycyclohex-1-ene-1-carboxylic acid | 26.66872 |
| 3,4-DihydroxyBenzoic Acid                                   | 26.86578 |
| Tetradecanoic acid                                          | 27.41272 |
| (3S,4R,5R)-1,3,4,5,6-Pentahydroxyhexan-2-one                | 27.74263 |
| (3S,4R,5S)-1,3,4,5,6-Pentahydroxyhexan-2-one                | 27.74707 |
| (3S,4R,5R)-1,3,4,5,6-Pentahydroxyhexan-2-one                | 27.9065  |
| (2R,3S,4R,5R)-2,3,4,5,6-Pentahydroxyhexanal                 | 27.98398 |
| (2R,3R,4S,5S,6R)-6-(hydroxymethyl)oxane-2,3,4,5-tetrol      | 28.1722  |

|                                                          |          |
|----------------------------------------------------------|----------|
| (2R,3R,4S,5S,6R)-6-(hydroxymethyl)oxane-2,3,4,5-tetrol   | 28.50215 |
| (2S,3R,4R,5R)-Hexane-1,2,3,4,5,6-hexol                   | 28.82983 |
| (2R,3S,4S,5R)-Hexane-1,2,3,4,5,6-hexol                   | 28.83205 |
| (2S,3R,4R,5R)-Hexane-1,2,3,4,5,6-hexol                   | 28.84312 |
| (2S,3R,4S,5R,6R)-6-(hydroxymethyl)oxane-2,3,4,5-tetrol   | 28.85197 |
| (3R,4R,5R,6R)-3-amino-6-(hydroxymethyl)oxane-2,4,5-triol | 28.86745 |
| Hexadecanoic acid                                        | 30.66323 |
| Hexadecanoic acid                                        | 30.66767 |
| Hexadecanoic acid                                        | 30.67208 |
| Hexadecanoic acid                                        | 30.68315 |
| (1R,2S,3r,4R,5S,6s)-Cyclohexane-1,2,3,4,5,6-hexol        | 31.332   |
| (9Z,12Z)-Octadeca-9,12-dienoic acid                      | 33.16767 |
| (9Z,12Z)-Octadeca-9,12-dienoic acid                      | 33.16988 |
| (9Z,12Z)-Octadeca-9,12-dienoic acid                      | 33.17208 |
| (9Z)-Octadec-9-enoic acid                                | 33.26067 |
| Octadecanoic acid                                        | 33.63928 |
| Octadecanoic acid                                        | 33.64594 |

**(d) ethyl acetate extract.**

| Compound Name                                                | RT(min)  |
|--------------------------------------------------------------|----------|
| Boric Acid                                                   | 8.192683 |
| Pyridine                                                     | 8.42075  |
| Pyridine                                                     | 8.863584 |
| O-Methylhydroxylamine                                        | 8.965433 |
| Propan-1-amine                                               | 9.1935   |
| 1H-pyridin-2-one                                             | 9.556633 |
| 2-Hydroxypropanoic acid                                      | 10.15888 |
| Hydroxyacetic acid                                           | 10.60397 |
| Oxalic Acid                                                  | 11.98125 |
| Methylpropanedioic acid                                      | 12.03662 |
| Oxalic Acid                                                  | 12.03882 |
| Oxalic Acid                                                  | 12.31118 |
| 1,3-diazinane-2,4-dione                                      | 12.33112 |
| 3-Hydroxypropionic Acid                                      | 12.43518 |
| Benzoic Acid                                                 | 15.07902 |
| Propane-1,2,3-triol                                          | 15.69238 |
| 3-Hydroxybutan-2-one                                         | 16.58472 |
| Butanedioic acid                                             | 16.64673 |
| (2R,3S)-Butane-1,2,3,4-tetrol                                | 20.9137  |
| (3S,4R,5R)-1,3,4,5,6-Pentahydroxyhexan-2-one                 | 27.7426  |
| (2S,3R,4R,5R)-Hexane-1,2,3,4,5,6-hexol                       | 28.84083 |
| (2R,3S,4S,5R)-Hexane-1,2,3,4,5,6-hexol                       | 28.84305 |
| 1-O-(2-ethylhexyl) 2-O-propan-2-yl benzene-1,2-dicarboxylate | 29.26375 |
| Hexadecanoic acid                                            | 30.66537 |
| (9Z,12Z)-Octadeca-9,12-dienoic acid                          | 33.15873 |
| (9Z,12Z)-Octadeca-9,12-dienoic acid                          | 33.1698  |
| (9Z,12Z)-Octadeca-9,12-dienoic acid                          | 33.172   |
| (9Z)-Octadec-9-enoic acid                                    | 33.26058 |
| Octadecanoic acid                                            | 33.62597 |
| Octadecanoic acid                                            | 33.63925 |
| Octadecanoic acid                                            | 33.65032 |
| Octadecanoic acid                                            | 33.65918 |

**(e) methanol extract.**

| Compound Name | RT(min) |
|---------------|---------|
|---------------|---------|

|                                       |          |
|---------------------------------------|----------|
| Pyridine                              | 8.429584 |
| Propan-1-amine                        | 9.193533 |
| Pyridine                              | 9.386167 |
| 1H-pyridin-2-one                      | 9.578816 |
| Butane-2,3-diol                       | 9.689533 |
| 2-Hydroxypropanoic acid               | 10.15895 |
| Hydroxyacetic acid                    | 10.60405 |
| 2-Methylpropan-1-amine                | 11.11338 |
| 2-Aminopropanoic acid                 | 11.32372 |
| Butan-1-amine                         | 11.43222 |
| Oxalic Acid                           | 12.03897 |
| Pyrrolidin-2-one                      | 12.3888  |
| 1,3-diazinane-2,4-dione               | 12.41537 |
| 3-Hydroxypropionic Acid               | 12.43308 |
| Pyridin-4(1H)-one                     | 12.67002 |
| 3-Hydroxybutanoic acid                | 12.8494  |
| (2S)-2-(methylamino)propanoic acid    | 13.1793  |
| Propanedioic acid                     | 13.9499  |
| Valine                                | 14.25768 |
| Urea                                  | 14.8489  |
| Benzoic Acid                          | 15.07697 |
| 2-Aminoethan-1-ol                     | 15.52648 |
| phosphono dihydrogen phosphate        | 15.5774  |
| Leucine                               | 15.63718 |
| Leucine                               | 15.63942 |
| Propane-1,2,3-triol                   | 15.69697 |
| Cyclohexene-4-carboxylic acid ester   | 15.7014  |
| Propane-1,2,3-triol                   | 15.70805 |
| (2S,3R)-butane-1,2,3-triol            | 16.0823  |
| Isoleucine                            | 16.15758 |
| 2-DEOXY(2R,3S)-Butane-1,2,3,4-tetrol  | 16.17087 |
| Proline                               | 16.24172 |
| Aminoacetic acid                      | 16.46095 |
| 2-oxohexanoic acid                    | 16.58273 |
| Butanedioic acid                      | 16.64472 |
| 2,3-Dihydroxypropanoic acid           | 17.0012  |
| Serine                                | 17.70095 |
| Threonine                             | 18.2789  |
| Pentanedioic acid                     | 18.4959  |
| 3-Aminopropanoic acid                 | 19.23105 |
| 3,4-dihydroxybutanoic acid            | 19.313   |
| 2-Hydroxybutanedioic acid             | 20.49762 |
| 2-Hydroxybutanedioic acid             | 20.50868 |
| 4-Hydroxybenzaldehyde                 | 20.66368 |
| (2R,3S)-Butane-1,2,3,4-tetrol         | 20.74563 |
| (2R,3S)-Butane-1,2,3,4-tetrol         | 20.90947 |
| 2-HydroxyBenzoic Acid                 | 20.95817 |
| 5-OxoProline                          | 21.18403 |
| 5-OxoProline                          | 21.20175 |
| 4-Aminobutanoic acid                  | 21.39438 |
| (2R,3S)-2,3,4-Trihydroxybutanoic acid | 21.62025 |
| (2R,3S)-2,3,4-Trihydroxybutanoic acid | 21.97895 |
| (2S)-2-aminopentanedioic acid         | 23.16802 |

|                                                                                                                                                                                            |          |
|--------------------------------------------------------------------------------------------------------------------------------------------------------------------------------------------|----------|
| (S)-2-Amino-3-phenylpropanoic acid                                                                                                                                                         | 23.31417 |
| (2R,3R,4S,5R)-5-(hydroxymethyl)oxolane-2,3,4-triol                                                                                                                                         | 23.9696  |
| Asparagine                                                                                                                                                                                 | 24.1069  |
| (2R,3R,4S)-Pentane-1,2,3,4,5-pentol                                                                                                                                                        | 24.63833 |
| (2R,4R)-Pentane-1,2,3,4,5-pentol                                                                                                                                                           | 24.7933  |
| Ethenyl icosyl carbonate                                                                                                                                                                   | 24.81767 |
| Ethenyl icosyl carbonate                                                                                                                                                                   | 24.81987 |
| (2R,3s,4S)-Pentane-1,2,3,4,5-pentol                                                                                                                                                        | 25.05237 |
| (2R,4R)-Pentane-1,2,3,4,5-pentol                                                                                                                                                           | 25.1498  |
| 3,6-ANHYDRO-(2S,3R,4S,5R,6R)-6-(hydroxymethyl)oxane-2,3,4,5-tetrol                                                                                                                         | 25.65688 |
| (2S,3R,4R,5R)-hexane-1,2,3,4,5-pentol                                                                                                                                                      | 25.8916  |
| (2R,3s,4S)-Pentane-1,2,3,4,5-pentol                                                                                                                                                        | 26.03332 |
| (3R,4S,5R)-3,4,5-Trihydroxycyclohex-1-ene-1-carboxylic acid                                                                                                                                | 26.6467  |
| (3R,4S,5R)-3,4,5-Trihydroxycyclohex-1-ene-1-carboxylic acid                                                                                                                                | 26.66662 |
| [(2R,3R,4R,5S,6R)-3-acetamido-4,5-dihydroxy-6-(hydroxymethyl)oxan-2-yl] [[(2R,3S,4R,5R)-5-(2,4-dioxypyrimidin-1-yl)-3,4-dihydroxyoxolan-2-yl]methoxy-hydroxyphosphoryl] hydrogen phosphate | 26.81718 |
| Citric Acid                                                                                                                                                                                | 26.82162 |
| 3,4-DihydroxyBenzoic Acid                                                                                                                                                                  | 26.86368 |
| (3S,4R,5R)-1,3,4,5,6-Pentahydroxyhexan-2-one                                                                                                                                               | 27.47042 |
| (3S,4R,5R)-1,3,4,5,6-Pentahydroxyhexan-2-one                                                                                                                                               | 27.72727 |
| (3S,4R,5S)-1,3,4,5,6-Pentahydroxyhexan-2-one                                                                                                                                               | 27.72948 |
| (3S,4R,5R)-1,3,4,5,6-Pentahydroxyhexan-2-one                                                                                                                                               | 27.74055 |
| (2R)-2-[(1S)-1,2-dihydroxyethyl]-3,4-dihydroxy-2H-furan-5-one                                                                                                                              | 27.7671  |
| (3S,4R,5R)-1,3,4,5,6-Pentahydroxyhexan-2-one                                                                                                                                               | 27.89993 |
| (2S,3R,4S,5R,6R)-6-(hydroxymethyl)oxane-2,3,4,5-tetrol                                                                                                                                     | 27.90215 |
| (3S,4S,5R)-1,3,4,5,6-Pentahydroxy-hexan-2-one                                                                                                                                              | 27.90658 |
| (2,5-Dioxo-4-imidazolidinyl) Urea                                                                                                                                                          | 27.97077 |
| (2R,3R,4S,5S,6R)-6-(hydroxymethyl)oxane-2,3,4,5-tetrol                                                                                                                                     | 28.0682  |
| (3S,4S,5S,6R)-6-(hydroxymethyl)oxane-2,3,4,5-tetrol                                                                                                                                        | 28.17227 |
| (2R,3R,4S,5S,6R)-6-(hydroxymethyl)oxane-2,3,4,5-tetrol                                                                                                                                     | 28.17668 |
| (2R,3R,4S,5S,6R)-6-(hydroxymethyl)oxane-2,3,4,5-tetrol                                                                                                                                     | 28.5     |
| (2R,3S,4S,5R)-Hexane-1,2,3,4,5,6-hexol                                                                                                                                                     | 28.73695 |
| 3-[(2R)-2,4-Dihydroxy-3,3-dimethylbutanamido]propanoic acid                                                                                                                                | 28.82328 |
| (2R,3R,4R,5R)-Hexane-1,2,3,4,5,6-hexol                                                                                                                                                     | 28.8255  |
| (2S,3R,4R,5R)-Hexane-1,2,3,4,5,6-hexol                                                                                                                                                     | 28.82993 |
| (2S,3R,4R,5R)-Hexane-1,2,3,4,5,6-hexol                                                                                                                                                     | 28.83435 |
| (2R,3S,4R,5S)-hexane-1,2,3,4,5,6-hexol                                                                                                                                                     | 28.89853 |
| (2R,3R,4R,5R)-Hexane-1,2,3,4,5,6-hexol                                                                                                                                                     | 28.90073 |
| (2R,3R,4R,5R)-Hexane-1,2,3,4,5,6-hexol                                                                                                                                                     | 28.90295 |
| (1R,2S,3r,4R,5S,6s)-Cyclohexane-1,2,3,4,5,6-hexol                                                                                                                                          | 29.17088 |
| 4-Methylpentanoic acid                                                                                                                                                                     | 29.86622 |
| Hexadecanoic acid                                                                                                                                                                          | 30.66782 |
| 4-Hydroxyquinoline-2-carboxylic acid                                                                                                                                                       | 30.9756  |
| 4-Hydroxyquinoline-2-carboxylic acid                                                                                                                                                       | 30.97782 |
| (1R,2S,3r,4R,5S,6s)-Cyclohexane-1,2,3,4,5,6-hexol                                                                                                                                          | 31.33213 |
| 2-(Acetylamino)-2-deoxy-β-D-mannopyranose                                                                                                                                                  | 31.64437 |
| N-[2,4,5-trihydroxy-6-(hydroxymethyl)oxan-3-yl]acetamide                                                                                                                                   | 31.83258 |
| 2-(Acetylamino)-2-deoxy-D-galactose                                                                                                                                                        | 31.94773 |
| N-[2,4,5-trihydroxy-6-(hydroxymethyl)oxan-3-yl]acetamide                                                                                                                                   | 32.0341  |
| (9E,12E)-Octadeca-9,12-dienoic acid                                                                                                                                                        | 33.16567 |
| (9Z,12Z)-Octadeca-9,12-dienoic acid                                                                                                                                                        | 33.16788 |
| (9Z,12Z)-Octadeca-9,12-dienoic acid                                                                                                                                                        | 33.1701  |
| (9Z,12Z)-Octadeca-9,12-dienoic acid                                                                                                                                                        | 33.17232 |

|                                                                                                                             |          |
|-----------------------------------------------------------------------------------------------------------------------------|----------|
| (9Z)-Octadec-9-enoic acid                                                                                                   | 33.25868 |
| (9Z,12Z,15Z)-Octadeca-9,12,15-trienoic acid                                                                                 | 33.28082 |
| Hexadecanoic acid                                                                                                           | 33.61742 |
| Octadecanoic acid                                                                                                           | 33.63957 |
| Octadecanoic acid                                                                                                           | 33.64178 |
| Propane-1,2,3-triol-3-galactoside                                                                                           | 34.3504  |
| (2R,3R,4S,5R,6S)-2-()-6-[[[(2R,3S,4R,5R,6R)-4,5,6-trihydroxy-2-(hydroxymethyl)oxan-3-yl]oxy}oxane-3,4,5-triol               | 37.33541 |
| (2R,3R,4S,5S,6R)-2-[[[(2S,3S,4S,5R)-3,4-Dihydroxy-2,5-bis(hydroxymethyl)oxolan-2-yl]oxy}-6-(hydroxymethyl)oxane-3,4,5-triol | 38.82132 |

**Table S6.** Common and unique compounds identified in different *E. foeminea* crude extracts via Venn diagram analysis using GC–MS.

| Occurrence                   | Total | Compound Name                                               |
|------------------------------|-------|-------------------------------------------------------------|
| ACE DCM/MeOH EA<br>EtOH MeOH | 16    | Oxalic Acid                                                 |
|                              |       | Hexadecanoic Acid                                           |
|                              |       | 3-Hydroxypropionic Acid                                     |
|                              |       | Pyridine                                                    |
|                              |       | (3S,4R,5R)-1,3,4,5,6-Pentahydroxyhexan-2-one                |
|                              |       | Benzoic Acid                                                |
|                              |       | 1,3-Diazinane-2,4-dione                                     |
|                              |       | (9Z,12Z)-Octadeca-9,12-Dienoic Acid                         |
|                              |       | (2R,3S)-Butane-1,2,3,4-Tetrol                               |
|                              |       | 1h-Pyridin-2-one                                            |
|                              |       | Hydroxyacetic Acid                                          |
|                              |       | (2R,3R,4R,5R)-hexane-1,2,3,4,5,6-hexol                      |
|                              |       | 2-Hydroxypropanoic Acid                                     |
|                              |       | Propane-1,2,3-triol                                         |
|                              |       | Butanedioic Acid                                            |
|                              |       | Octadecanoic Acid                                           |
| DCM/MeOH EA EtOH<br>MeOH     | 1     | (9Z)-Octadec-9-Enoic Acid                                   |
| ACE DCM/MeOH<br>EtOH MeOH    | 5     | Pyrrolidin-2-one                                            |
|                              |       | (3S,4R,5S)-1,3,4,5,6-Pentahydroxyhexan-2-one                |
|                              |       | 5-Oxoproline                                                |
|                              |       | (2R,3S,4S)-Pentane-1,2,3,4,5-Pentol                         |
| ACE EA EtOH MeOH             | 2     | (3R,4S,5R)-3,4,5-Trihydroxycyclohex-1-Ene-1-Carboxylic Acid |
|                              |       | Propan-1-Amine                                              |
|                              |       | (2S,3R,4R,5R)-Hexane-1,2,3,4,5,6-hexol                      |
| DCM/MeOH EtOH<br>MeOH        | 9     | (2S,3R,4S,5R,6R)-6-(Hydroxymethyl)Oxane-2,3,4,5-Tetrol      |
|                              |       | (1R,2S,3R,4R,5S,6S)-Cyclohexane-1,2,3,4,5,6-hexol           |
|                              |       | 2-Aminoethan-1-ol                                           |
|                              |       | 4-Aminobutanoic Acid                                        |
|                              |       | Valine                                                      |
|                              |       | 2-Hydroxybutanedioic Acid                                   |
|                              |       | 3,4-Dihydroxybenzoic Acid                                   |
|                              |       | (2R,3R,4S,5S,6R)-6-(Hydroxymethyl)Oxane-2,3,4,5-Tetrol      |

|                      |    |                                                                                                                                                                                                                                                                                                                                                                                                                                                                                                                                                                                                                                                                                                                                                                                            |
|----------------------|----|--------------------------------------------------------------------------------------------------------------------------------------------------------------------------------------------------------------------------------------------------------------------------------------------------------------------------------------------------------------------------------------------------------------------------------------------------------------------------------------------------------------------------------------------------------------------------------------------------------------------------------------------------------------------------------------------------------------------------------------------------------------------------------------------|
|                      |    | (2R,4R)-Pentane-1,2,3,4,5-Pentol                                                                                                                                                                                                                                                                                                                                                                                                                                                                                                                                                                                                                                                                                                                                                           |
| ACE DCM/MeOH<br>MeOH | 3  | (9Z,12Z,15Z)-octadeca-9,12,15-trienoic acid<br><br>(3S,4S,5S,6R)-6-(Hydroxymethyl)Oxane-2,3,4,5-Tetrol<br>2-Methylpropan-1-Amine                                                                                                                                                                                                                                                                                                                                                                                                                                                                                                                                                                                                                                                           |
| ACE EtOH MeOH        | 2  | (2S,3R)-Butane-1,2,3-triol<br>2-Oxohexanoic Acid                                                                                                                                                                                                                                                                                                                                                                                                                                                                                                                                                                                                                                                                                                                                           |
| ACE EA EtOH          | 1  | Boric Acid                                                                                                                                                                                                                                                                                                                                                                                                                                                                                                                                                                                                                                                                                                                                                                                 |
| DCM/MeOH MeOH        | 5  | (2R)-2-[(1S)-1,2-Dihydroxyethyl]-3,4-Dihydroxy-2H-Furan-5-one<br>Aminoacetic Acid<br>(2R,3R,4S)-Pentane-1,2,3,4,5-Pentol<br>2,3-Dihydroxypropanoic Acid<br>(2R,3R,4R,5R)-Hexane-1,2,3,4,5,6-hexol                                                                                                                                                                                                                                                                                                                                                                                                                                                                                                                                                                                          |
| DCM/MeOH EtOH        | 1  | Tetradecanoic Acid                                                                                                                                                                                                                                                                                                                                                                                                                                                                                                                                                                                                                                                                                                                                                                         |
| ACE DCM/MeOH         | 1  | (2R,3R)-Butane-1,2,3,4-Tetrol                                                                                                                                                                                                                                                                                                                                                                                                                                                                                                                                                                                                                                                                                                                                                              |
| EtOH MeOH            | 8  | Isoleucine<br>Proline<br>Urea<br>3-Hydroxybutanoic Acid<br>Butan-1-Amine<br>Ethenyl Icosyl Carbonate<br>(2R,3R,4S,5R)-5-(Hydroxymethyl)Oxolane-2,3,4-triol<br>2-Aminopropanoic Acid                                                                                                                                                                                                                                                                                                                                                                                                                                                                                                                                                                                                        |
| ACE MeOH             | 2  | Pentanedioic Acid<br>(2S)-2-(Methylamino)Propanoic Acid                                                                                                                                                                                                                                                                                                                                                                                                                                                                                                                                                                                                                                                                                                                                    |
| ACE EtOH             | 1  | (2R,3S,4R,5R)-2,3,4,5,6-Pentahydroxyhexanal                                                                                                                                                                                                                                                                                                                                                                                                                                                                                                                                                                                                                                                                                                                                                |
| ACE EA               | 1  | O-Methylhydroxylamine                                                                                                                                                                                                                                                                                                                                                                                                                                                                                                                                                                                                                                                                                                                                                                      |
| DCM/MeOH             | 4  | Xylose<br>(3R,4R,5R)-2-(Hydroxymethyl)Oxane-2,3,4,5-Tetrol<br>Acetic Acid<br>(2S,3R,4S,5R,6R)-2-[(2R,3S,4S,5R)-4,5-Dihydroxy-2,5-Bis(Hydroxymethyl)Oxolan-3-yl]Oxy-6-(Hydroxymethyl)Oxane-3,4,5-triol                                                                                                                                                                                                                                                                                                                                                                                                                                                                                                                                                                                      |
| MeOH                 | 34 | (2R,3R,4S,5R,6S)-2-()-6-[[[(2R,3S,4R,5R,6R)-4,5,6-Trihydroxy-2-(Hydroxymethyl)Oxan-3-yl]Oxy]Oxane-3,4,5-triol<br>Pyridin-4(1H)-one<br>(2R,3S,4R,5S)-Hexane-1,2,3,4,5,6-hexol<br>3-Aminopropanoic Acid<br>Propanedioic Acid<br>[(2R,3R,4R,5S,6R)-3-Acetamido-4,5-Dihydroxy-6-(Hydroxymethyl)Oxan-2-yl] [[[2R,3S,4R,5R)-5-(2,4-Dioxypyrimidin-1-yl)-3,4-Dihydroxyoxolan-2-yl]Methoxy-Hydroxyphosphoryl] Hydrogen Phosphate<br>2-Hydroxybenzoic Acid<br>2-Deoxy(2R,3S)-Butane-1,2,3,4-Tetrol<br>3-[(2R)-2,4-Dihydroxy-3,3-Dimethylbutanamido]Propanoic Acid<br>N-[2,4,5-Trihydroxy-6-(Hydroxymethyl)Oxan-3-yl]Acetamide<br>(3S,4S,5R)-1,3,4,5,6-Pentahydroxy-Hexan-2-one<br>Propane-1,2,3-triol-3-Galactoside<br>Serine<br>3,6-Anhydro-(2S,3R,4S,5R,6R)-6-(Hydroxymethyl)Oxane-2,3,4,5-Tetrol |

|      |   |                                                                                                                                                                                                                                                                                                                                                                                                                                                                                                                                                                                                                                                                                                                                 |
|------|---|---------------------------------------------------------------------------------------------------------------------------------------------------------------------------------------------------------------------------------------------------------------------------------------------------------------------------------------------------------------------------------------------------------------------------------------------------------------------------------------------------------------------------------------------------------------------------------------------------------------------------------------------------------------------------------------------------------------------------------|
|      |   | Phosphono Dihydrogen Phosphate<br>(2,5-Dioxo-4-Imidazolidinyl) Urea<br>Leucine<br>(2R,3S)-2,3,4-Trihydroxybutanoic Acid<br>(2S,3R,4R,5R)-Hexane-1,2,3,4,5-Pentol<br>Cyclohexene-4-Carboxylic Acid Ester<br>(2R,3R,4S,5S,6R)-2-[[[(2S,3S,4S,5R)-3,4-Dihydroxy-2,5-Bis(Hydroxymethyl)Oxolan-2-yl]Oxy}-6-(Hydroxymethyl)Oxane-3,4,5-triol<br>4-Hydroxyquinoline-2-Carboxylic Acid<br>4-Methylpentanoic Acid<br>Threonine<br>(9E,12E)-Octadeca-9,12-Dienoic Acid<br>4-Hydroxybenzaldehyde<br>2-(Acetylamino)-2-Deoxy-Î'-D-Mannopyranose<br>Citric Acid<br>(S)-2-Amino-3-Phenylpropanoic Acid<br>Asparagine<br>2-(Acetylamino)-2-Deoxy-D-Galactose<br>(2S)-2-Aminopentanedioic Acid<br>Butane-2,3-diol<br>3,4-Dihydroxybutanoic Acid |
| EtOH | 6 | Nonanoic Acid<br>4-Hydroxybenzoic Acid<br>4-Hydroxybutanoic Acid<br>(3R,4R,5R,6R)-3-Amino-6-(Hydroxymethyl)Oxane-2,4,5-triol<br>2,3-Bis(Phosphonoxy)Propanoic Acid<br>Dodecanoic Acid                                                                                                                                                                                                                                                                                                                                                                                                                                                                                                                                           |
| EA   | 3 | Methylpropanedioic Acid<br>1-O-(2-Ethylhexyl) 2-O-Propan-2-yl Benzene-1,2-Dicarboxylate<br>3-Hydroxybutan-2-one                                                                                                                                                                                                                                                                                                                                                                                                                                                                                                                                                                                                                 |
| ACE  | 2 | 1-Butyl-1-Ethylhydrazine<br>1,2-Xylene                                                                                                                                                                                                                                                                                                                                                                                                                                                                                                                                                                                                                                                                                          |

**Table S7.** Result from Over Representation Analysis (ORA) of all five *E. foeminea* crude extract samples.

| Class group                | Total | Expected | Hits | Raw p    | Holm p   | FDR <sup>1</sup> |
|----------------------------|-------|----------|------|----------|----------|------------------|
| Amino acids                | 277   | 0.13     | 10   | 1.73E-16 | 1.81E-13 | 1.81E-13         |
| Sugar alcohols             | 12    | 0.00562  | 5    | 1.59E-14 | 1.67E-11 | 8.34E-12         |
| Saturated Fatty Acids      | 38    | 0.0178   | 6    | 2.44E-14 | 2.55E-11 | 8.51E-12         |
| Monosaccharides            | 18    | 0.00843  | 4    | 1.37E-10 | 1.43E-07 | 3.59E-08         |
| Dicarboxylic acids         | 140   | 0.0656   | 5    | 8.01E-09 | 8.35E-06 | 1.68E-06         |
| 1,2-aminoalcohols          | 3     | 0.0014   | 2    | 6.51E-07 | 0.000677 | 9.72E-05         |
| Pyridines                  | 3     | 0.0014   | 2    | 6.51E-07 | 0.000677 | 9.72E-05         |
| Hydroxybenzoic acids       | 6     | 0.00281  | 2    | 3.25E-06 | 0.00338  | 0.000425         |
| Disaccharides              | 9     | 0.00421  | 2    | 7.79E-06 | 0.00809  | 0.000807         |
| TCA acids                  | 9     | 0.00421  | 2    | 7.79E-06 | 0.00809  | 0.000807         |
| Unsaturated Fatty Acids    | 267   | 0.125    | 4    | 8.49E-06 | 0.00879  | 0.000807         |
| Sugar acids                | 23    | 0.0108   | 2    | 5.45E-05 | 0.0564   | 0.00439          |
| Organic dicarboxylic acids | 23    | 0.0108   | 2    | 5.45E-05 | 0.0564   | 0.00439          |

|                                        |      |          |   |          |       |        |
|----------------------------------------|------|----------|---|----------|-------|--------|
| Hydroxy Fatty Acids                    | 274  | 0.128    | 3 | 0.000308 | 0.318 | 0.023  |
| Alkali metal pyrophosphates            | 1    | 0.000468 | 1 | 0.000468 | 0.483 | 0.0288 |
| Pyrroline carboxylic acids             | 1    | 0.000468 | 1 | 0.000468 | 0.483 | 0.0288 |
| o-Xylenes                              | 1    | 0.000468 | 1 | 0.000468 | 0.483 | 0.0288 |
| Beta hydroxy acids                     | 3    | 0.0014   | 1 | 0.0014   | 1     | 0.0734 |
| Salicylic acids                        | 3    | 0.0014   | 1 | 0.0014   | 1     | 0.0734 |
| Hydroxybenzaldehydes                   | 3    | 0.0014   | 1 | 0.0014   | 1     | 0.0734 |
| Butenolides                            | 4    | 0.00187  | 1 | 0.00187  | 1     | 0.089  |
| Cyclitols                              | 4    | 0.00187  | 1 | 0.00187  | 1     | 0.089  |
| Acylaminosugars                        | 6    | 0.00281  | 1 | 0.00281  | 1     | 0.117  |
| Ureas                                  | 6    | 0.00281  | 1 | 0.00281  | 1     | 0.117  |
| Straight chain Fatty Acids             | 6    | 0.00281  | 1 | 0.00281  | 1     | 0.117  |
| Short-chain acids and derivatives      | 7    | 0.00328  | 1 | 0.00327  | 1     | 0.132  |
| Quinoline carboxylic acids             | 8    | 0.00375  | 1 | 0.00374  | 1     | 0.145  |
| Pyrimidines                            | 9    | 0.00421  | 1 | 0.00421  | 1     | 0.157  |
| Pyrimidine ribonucleoside diphosphates | 10   | 0.00468  | 1 | 0.00467  | 1     | 0.169  |
| Monoalkylamines                        | 14   | 0.00656  | 1 | 0.00654  | 1     | 0.228  |
| Benzoic acids                          | 24   | 0.0112   | 1 | 0.0112   | 1     | 0.377  |
| Branched Fatty Acids                   | 38   | 0.0178   | 1 | 0.0176   | 1     | 0.577  |
| Oxo Fatty Acids                        | 43   | 0.0201   | 1 | 0.0199   | 1     | 0.628  |
| Amino Fatty Acids                      | 44   | 0.0206   | 1 | 0.0204   | 1     | 0.628  |
| Hydroxy Fatty Acids                    | 293  | 0.137    | 1 | 0.128    | 1     | 1      |
| Hippuric acids                         | 1470 | 0.687    | 2 | 0.151    | 1     | 1      |

<sup>1</sup> FDR: False Discovery Rate

**Table S8.** Result from Over Representation Analysis (ORA) of different *E. foeminea* crude extract samples.

| (a) acetone extract.                  |       |          |      |          |          |                  |
|---------------------------------------|-------|----------|------|----------|----------|------------------|
| Class group                           | Total | Expected | Hits | Raw p    | Holm p   | FDR <sup>1</sup> |
| Sugar alcohols                        | 12    | 0.00187  | 3    | 7.57E-10 | 7.92E-07 | 7.92E-07         |
| Pyridines                             | 3     | 0.000468 | 2    | 7.07E-08 | 7.39E-05 | 3.70E-05         |
| Dicarboxylic acids                    | 140   | 0.0219   | 3    | 1.52E-06 | 0.00159  | 0.00053          |
| Monosaccharides                       | 18    | 0.00281  | 2    | 3.60E-06 | 0.00376  | 0.000942         |
| Saturated Fatty Acids                 | 38    | 0.00593  | 2    | 1.65E-05 | 0.0172   | 0.00346          |
| Pyrroline carboxylic acids            | 1     | 0.000156 | 1    | 0.000156 | 0.162    | 0.0233           |
| o-Xylenes                             | 1     | 0.000156 | 1    | 0.000156 | 0.162    | 0.0233           |
| Cyclitols                             | 4     | 0.000624 | 1    | 0.000624 | 0.649    | 0.0816           |
| Unsaturated Fatty Acids               | 267   | 0.0417   | 2    | 0.000816 | 0.847    | 0.0898           |
| Hydroxy Fatty Acids                   | 274   | 0.0428   | 2    | 0.000859 | 0.891    | 0.0898           |
| TCA acids                             | 9     | 0.0014   | 1    | 0.0014   | 1        | 0.122            |
| Pyrimidines                           | 9     | 0.0014   | 1    | 0.0014   | 1        | 0.122            |
| Benzoic acids                         | 24    | 0.00375  | 1    | 0.00374  | 1        | 0.301            |
| Oxo Fatty Acids                       | 43    | 0.00671  | 1    | 0.00669  | 1        | 0.5              |
| Hippuric acids                        | 1470  | 0.229    | 1    | 0.205    | 1        | 1                |
| (b) dichloromethane/methanol extract. |       |          |      |          |          |                  |
| Class group                           | Total | Expected | Hits | Raw p    | Holm p   | FDR <sup>1</sup> |
| Saturated Fatty Acids                 | 38    | 0.00842  | 4    | 1.54E-10 | 1.61E-07 | 1.61E-07         |
| Sugar alcohols                        | 12    | 0.00266  | 3    | 2.23E-09 | 2.33E-06 | 1.17E-06         |
| Pyridines                             | 3     | 0.000665 | 2    | 1.44E-07 | 0.00015  | 5.02E-05         |

|                            |      |          |   |          |         |         |
|----------------------------|------|----------|---|----------|---------|---------|
| Monosaccharides            | 18   | 0.00399  | 2 | 7.32E-06 | 0.00764 | 0.00192 |
| Unsaturated Fatty Acids    | 267  | 0.0592   | 3 | 3.06E-05 | 0.0318  | 0.00639 |
| Pyrroline carboxylic acids | 1    | 0.000222 | 1 | 0.000222 | 0.231   | 0.0386  |
| Dicarboxylic acids         | 140  | 0.031    | 2 | 0.000458 | 0.476   | 0.0684  |
| 1,2-aminoalcohols          | 3    | 0.000665 | 1 | 0.000665 | 0.69    | 0.0869  |
| Butenolides                | 4    | 0.000886 | 1 | 0.000886 | 0.92    | 0.0927  |
| Cyclitols                  | 4    | 0.000886 | 1 | 0.000886 | 0.92    | 0.0927  |
| Hydroxybenzoic acids       | 6    | 0.00133  | 1 | 0.00133  | 1       | 0.116   |
| Straight chain Fatty Acids | 6    | 0.00133  | 1 | 0.00133  | 1       | 0.116   |
| Hydroxy Fatty Acids        | 274  | 0.0607   | 2 | 0.00173  | 1       | 0.123   |
| Amino acids                | 277  | 0.0614   | 2 | 0.00176  | 1       | 0.123   |
| Disaccharides              | 9    | 0.00199  | 1 | 0.00199  | 1       | 0.123   |
| TCA acids                  | 9    | 0.00199  | 1 | 0.00199  | 1       | 0.123   |
| Pyrimidines                | 9    | 0.00199  | 1 | 0.00199  | 1       | 0.123   |
| Sugar acids                | 23   | 0.0051   | 1 | 0.00508  | 1       | 0.292   |
| Benzoic acids              | 24   | 0.00532  | 1 | 0.0053   | 1       | 0.292   |
| Amino Fatty Acids          | 44   | 0.00975  | 1 | 0.0097   | 1       | 0.507   |
| Hippuric acids             | 1470 | 0.325    | 2 | 0.0421   | 1       | 1       |

**(c)** ethanol extract.

| Class group                       | Total | Expected | Hits | Raw p    | Holm p   | FDR <sup>1</sup> |
|-----------------------------------|-------|----------|------|----------|----------|------------------|
| Saturated Fatty Acids             | 38    | 0.00976  | 5    | 4.55E-13 | 4.76E-10 | 4.76E-10         |
| Sugar alcohols                    | 12    | 0.00308  | 3    | 3.50E-09 | 3.66E-06 | 1.83E-06         |
| 1,2-aminoalcohols                 | 3     | 0.00077  | 2    | 1.94E-07 | 0.000202 | 5.07E-05         |
| Pyridines                         | 3     | 0.00077  | 2    | 1.94E-07 | 0.000202 | 5.07E-05         |
| Amino acids                       | 277   | 0.0711   | 4    | 8.79E-07 | 0.000916 | 0.000169         |
| Hydroxybenzoic acids              | 6     | 0.00154  | 2    | 9.69E-07 | 0.00101  | 0.000169         |
| Monosaccharides                   | 18    | 0.00462  | 2    | 9.87E-06 | 0.0103   | 0.00147          |
| Hydroxy Fatty Acids               | 274   | 0.0704   | 3    | 5.15E-05 | 0.0535   | 0.00673          |
| Pyrroline carboxylic acids        | 1     | 0.000257 | 1    | 0.000257 | 0.267    | 0.0298           |
| Dicarboxylic acids                | 140   | 0.036    | 2    | 0.000615 | 0.638    | 0.0643           |
| Beta hydroxy acids                | 3     | 0.00077  | 1    | 0.00077  | 0.798    | 0.0732           |
| Cyclitols                         | 4     | 0.00103  | 1    | 0.00103  | 1        | 0.0826           |
| 1,2-diols                         | 4     | 0.00103  | 1    | 0.00103  | 1        | 0.0826           |
| Ureas                             | 6     | 0.00154  | 1    | 0.00154  | 1        | 0.115            |
| Short-chain acids and derivatives | 7     | 0.0018   | 1    | 0.0018   | 1        | 0.125            |
| Unsaturated Fatty Acids           | 267   | 0.0686   | 2    | 0.0022   | 1        | 0.134            |
| TCA acids                         | 9     | 0.00231  | 1    | 0.00231  | 1        | 0.134            |
| Pyrimidines                       | 9     | 0.00231  | 1    | 0.00231  | 1        | 0.134            |
| Monoalkylamines                   | 14    | 0.0036   | 1    | 0.00359  | 1        | 0.198            |
| Benzoic acids                     | 24    | 0.00616  | 1    | 0.00615  | 1        | 0.321            |
| Hippuric acids                    | 1470  | 0.377    | 3    | 0.00645  | 1        | 0.321            |
| Oxo Fatty Acids                   | 43    | 0.011    | 1    | 0.011    | 1        | 0.511            |
| Amino Fatty Acids                 | 44    | 0.0113   | 1    | 0.0112   | 1        | 0.511            |

**(d)** ethyl acetate extract.

| Class group    | Total | Expected | Hits | Raw p    | Holm p   | FDR <sup>1</sup> |
|----------------|-------|----------|------|----------|----------|------------------|
| Sugar alcohols | 12    | 0.00133  | 3    | 2.59E-10 | 2.71E-07 | 2.71E-07         |
| Pyridines      | 3     | 0.000332 | 2    | 3.51E-08 | 3.67E-05 | 1.84E-05         |

|                            |     |          |   |          |          |          |
|----------------------------|-----|----------|---|----------|----------|----------|
| Dicarboxylic acids         | 140 | 0.0155   | 3 | 5.23E-07 | 0.000546 | 0.000182 |
| Saturated Fatty Acids      | 38  | 0.00421  | 2 | 8.22E-06 | 0.00857  | 0.00215  |
| Unsaturated Fatty Acids    | 267 | 0.0296   | 2 | 0.000409 | 0.426    | 0.075    |
| Hydroxy Fatty Acids        | 274 | 0.0304   | 2 | 0.00043  | 0.448    | 0.075    |
| TCA acids                  | 9   | 0.000997 | 1 | 0.000997 | 1        | 0.13     |
| Pyrimidines                | 9   | 0.000997 | 1 | 0.000997 | 1        | 0.13     |
| Organic dicarboxylic acids | 23  | 0.00255  | 1 | 0.00254  | 1        | 0.278    |
| Benzoic acids              | 24  | 0.00266  | 1 | 0.00266  | 1        | 0.278    |

**(e)** methanol extract.

| Class group                            | Total | Expected | Hits | Raw p    | Holm p   | FDR <sup>1</sup> |
|----------------------------------------|-------|----------|------|----------|----------|------------------|
| Amino acids                            | 277   | 0.107    | 10   | 2.39E-17 | 2.50E-14 | 2.50E-14         |
| Sugar alcohols                         | 12    | 0.00465  | 5    | 6.07E-15 | 6.34E-12 | 3.17E-12         |
| Dicarboxylic acids                     | 140   | 0.0543   | 4    | 3.08E-07 | 0.000321 | 0.000107         |
| Pyridines                              | 3     | 0.00116  | 2    | 4.45E-07 | 0.000464 | 0.000116         |
| Unsaturated Fatty Acids                | 267   | 0.104    | 4    | 4.00E-06 | 0.00417  | 0.000837         |
| TCA acids                              | 9     | 0.00349  | 2    | 5.33E-06 | 0.00555  | 0.00093          |
| Monosaccharides                        | 18    | 0.00698  | 2    | 2.26E-05 | 0.0235   | 0.00338          |
| Sugar acids                            | 23    | 0.00892  | 2    | 3.73E-05 | 0.0388   | 0.00488          |
| Saturated Fatty Acids                  | 38    | 0.0147   | 2    | 0.000103 | 0.107    | 0.012            |
| Alkali metal pyrophosphates            | 1     | 0.000388 | 1    | 0.000388 | 0.402    | 0.0369           |
| Pyrroline carboxylic acids             | 1     | 0.000388 | 1    | 0.000388 | 0.402    | 0.0369           |
| 1,2-aminoalcohols                      | 3     | 0.00116  | 1    | 0.00116  | 1        | 0.0811           |
| Beta hydroxy acids                     | 3     | 0.00116  | 1    | 0.00116  | 1        | 0.0811           |
| Salicylic acids                        | 3     | 0.00116  | 1    | 0.00116  | 1        | 0.0811           |
| Hydroxybenzaldehydes                   | 3     | 0.00116  | 1    | 0.00116  | 1        | 0.0811           |
| Butenolides                            | 4     | 0.00155  | 1    | 0.00155  | 1        | 0.0954           |
| Cyclitols                              | 4     | 0.00155  | 1    | 0.00155  | 1        | 0.0954           |
| Hydroxybenzoic acids                   | 6     | 0.00233  | 1    | 0.00232  | 1        | 0.122            |
| Acylaminosugars                        | 6     | 0.00233  | 1    | 0.00232  | 1        | 0.122            |
| Ureas                                  | 6     | 0.00233  | 1    | 0.00232  | 1        | 0.122            |
| Quinoline carboxylic acids             | 8     | 0.0031   | 1    | 0.0031   | 1        | 0.154            |
| Disaccharides                          | 9     | 0.00349  | 1    | 0.00348  | 1        | 0.158            |
| Pyrimidines                            | 9     | 0.00349  | 1    | 0.00348  | 1        | 0.158            |
| Pyrimidine ribonucleoside diphosphates | 10    | 0.00388  | 1    | 0.00387  | 1        | 0.169            |
| Hydroxy Fatty Acids                    | 274   | 0.106    | 2    | 0.00518  | 1        | 0.217            |
| Monoalkylamines                        | 14    | 0.00543  | 1    | 0.00541  | 1        | 0.218            |
| Organic dicarboxylic acids             | 23    | 0.00892  | 1    | 0.00888  | 1        | 0.344            |
| Benzoic acids                          | 24    | 0.00931  | 1    | 0.00926  | 1        | 0.346            |
| Branched Fatty Acids                   | 38    | 0.0147   | 1    | 0.0146   | 1        | 0.528            |
| Oxo Fatty Acids                        | 43    | 0.0167   | 1    | 0.0165   | 1        | 0.571            |
| Amino Fatty Acids                      | 44    | 0.0171   | 1    | 0.0169   | 1        | 0.571            |
| Hydroxy Fatty Acids                    | 293   | 0.114    | 1    | 0.107    | 1        | 1                |
| Hippuric acids                         | 1470  | 0.569    | 2    | 0.111    | 1        | 1                |

<sup>1</sup>FDR: False Discovery Rate
